# Supplementary material for: Dimeric polyphenols to pave the way for new antimalarial drugs
Source: Royal Society of Chemistry journal article supplement (doi:10.1039/d2md00392a), 2023-01-01

## Supporting Information

### Dimeric Polyphenols to Pave the Way for New Antimalarial Drugs.

Degotte Gilles<sup>a,b\*</sup>, Pendeville Hélène<sup>c</sup>, Di Chio Carla<sup>d</sup>, Ettari Roberta<sup>d</sup>, Pirotte Bernard<sup>a</sup>,  
Frédérich Michel<sup>b</sup> & Francotte Pierre<sup>a</sup>

<sup>a</sup> Laboratory of Medicinal Chemistry, CIRM, University of Liège, Department of Pharmacy, Quartier Hôpital - B36 Tower 4, +5, Avenue Hippocrate 15, 4000 Liège, Belgium

<sup>b</sup> Laboratory of Pharmacognosy, CIRM, University of Liège, Department of Pharmacy, Quartier Hôpital - B36 Tower 4, +5, Avenue Hippocrate 15, 4000 Liège, Belgium

<sup>c</sup> Platform Zebrafish facility & transgenics, GIGA, University of Liège, Quartier Hôpital - B34, +2, Avenue de l'Hôpital 11, 4000 Liège, Belgium

<sup>d</sup> Dipartimento di Scienze chimiche, biologiche, farmaceutiche e ambientali, Università degli Studi di Messina, Viale Annunziata, 98168 Messina, Italy

### Table of contents

|                                                                          |    |
|--------------------------------------------------------------------------|----|
| <i>Synthesis propyl caffeate &amp; gallate</i> .....                     | 1  |
| <i>Synthesis of (4-methoxybenzyl)oxydiol</i> .....                       | 1  |
| <i>Addition of hydroxybenzoic acid on (4-methoxybenzyl)oxydiol</i> ..... | 2  |
| <i>Determination of LogP by HPLC</i> .....                               | 3  |
| <i>Biological activities of synthetic intermediates</i> .....            | 5  |
| <i>References</i> .....                                                  | 6  |
| <i>UV spectra</i> .....                                                  | 3  |
| <i>NMR Spectra</i> .....                                                 | 13 |

### Synthesis propyl caffeate & gallate

The carboxylic acid (1.0 g) was dissolved in 50 mL of *n*-propanol and a few drops of concentrated H<sub>2</sub>SO<sub>4</sub> were cautiously added. The mixture was heated under reflux until the end of the reaction (monitored by TLC, ~ 6h). The reaction mixture was cooled before a part of the organic solvent was eliminated by evaporation under vacuo. After that, water (25 mL) was added, and the solution was extracted three times with ethyl acetate (50 mL). Then, the organic phase was washed with brine (50 mL) and dried over anhydrous magnesium sulfate (MgSO<sub>4</sub>). The suspension was filtered, and the solvent was removed by evaporation under vacuo. The solid was placed overnight in a stove (30°C).

**Propyl gallate**, white solid, Yield 86 %, MP. 145°C/Lit. 145-146°C,<sup>1</sup> <sup>1</sup>H-NMR (in DMSO) δ 6.95 (2H, s), 4.12 (2H, t), 1.68 (2H, m), 0.95 (3H, t); <sup>13</sup>C-NMR (in DMSO) δ 166.33, 146.02, 138.81, 120.02, 108.91, 65.89, 22.16, 10.86; EA Th C, 56.60%; H, 5.70%; Found: C, 56.93%; H, 6.10%.

**Propyl caffeate**, white solid, Yield 66 % after DCVC (DCM/MeOH (1/0 to 95/5), MP = 128 °C/Lit. 127 °C,<sup>2</sup> <sup>1</sup>H-NMR (in DMSO) δ 7.47 (1H, d), 7.04 (1H, d), 7.01 (1H, dd), 6.75 (1H, d), 6.26 (1H, d), 4.07 (2H, t), 1.64 (2H, m), 0.92 (3H, t); <sup>13</sup>C-NMR (in DMSO) δ 167.09, 148.86, 146.03, 145.48, 125.96, 121.81, 116.19, 115.28, 114.46, 65.65, 22.15, 10.86; EA Th: C, 64.85%; H, 6.35%; Found: C, 64.84%; H, 6.39%.

### Synthesis of (4-methoxybenzyl)oxydiol

The diol (13.0 mmol) was dispersed in DMSO (12 mL) at 0°C. Potassium hydroxide (13.0 mmol) was added to the reaction media and stirred until the solution was clear. Then, *para*-methoxybenzyl chloride (6.50 mmol) was poured in the mixture and stirred until the end of the reaction at RT. After that, 6 mL ether and 5 mL 5N HCl were poured to quench the reaction. The aqueous part was extracted 3 times with ether. The organic phase was dried with MgSO<sub>4</sub>, filtrated, and evaporated. The oil was purified on DCVC (*n*-hexane/EtOAc, 1/0 to 0/1).

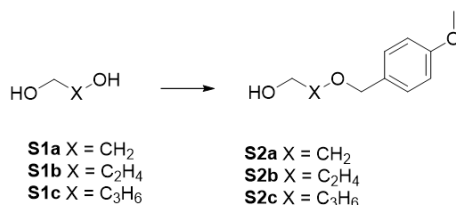

**2-((4-methoxybenzyl)oxy)ethan-1-ol (S2a)**, colourless oil, <sup>1</sup>H-NMR (in CDCl<sub>3</sub>) δ 7.27 (2H, d), 6.89 (2H, d), 4.49 (2H, s), 3.81 (3H, s), 3.74 (2H, t), 3.57 (2H, t); <sup>13</sup>C-NMR (in CDCl<sub>3</sub>) δ 159.34, 130.07, 129.46, 113.88, 72.97, 71.06, 61.92, 55.29.

**3-((4-methoxybenzyl)oxy)propan-1-ol (S2b)**, colourless oil, <sup>1</sup>H-NMR (in CDCl<sub>3</sub>) δ 7.25 (2H, d), 6.88 (2H, d), 4.45 (2H, s), 3.80 (3H, s), 3.77 (2H, t), 3.64 (2H, t), 1.85 (2H, m); <sup>13</sup>C-NMR (in CDCl<sub>3</sub>) δ 159.26, 130.16, 129.30, 113.85, 72.95, 69.20, 62.07, 55.29, 32.07.

**4-((4-methoxybenzyl)oxy)butan-1-ol (S2c)**, colourless oil,  $^1\text{H-NMR}$  (in  $\text{CDCl}_3$ )  $\delta$  7.25 (2H, d), 6.88 (2H, d), 4.44 (2H, s), 3.79 (3H, s), 3.62 (2H, t), 3.49 (2H, t), 1.71-1.64 (4H, m);  $^{13}\text{C-NMR}$  (in  $\text{CDCl}_3$ )  $\delta$  159.22, 130.20, 129.37, 113.82, 72.71, 70.05, 62.66, 55.26, 30.19, 26.75.

#### *Addition of hydroxybenzoic acid on (4-methoxybenzyl)oxydiol*

To a solution of the protected alcohol (1.5 eq.) in  $\text{CH}_2\text{Cl}_2$  (167 mL) were added the hydroxybenzoic acid (8.73 g, 25.1 mmol), DMAP (2.04 g, 16.7 mmol), and EDCI.HCl (6.41 g, 33.4 mmol). The mixture was stirred at rt until the term of the reaction (controlled by TLC). Then, the mixture was neutralized with 1 N aq.  $\text{H}_3\text{PO}_4$ , and diluted with  $\text{H}_2\text{O}$  (25 mL). After, the solution was extracted with EtOAc. The organic layer was washed with  $\text{H}_2\text{O}$  and brine. After the general drying procedure and evaporation under vacuo, the resulting product was purified by flash chromatography to obtain a colourless oil.<sup>3</sup>

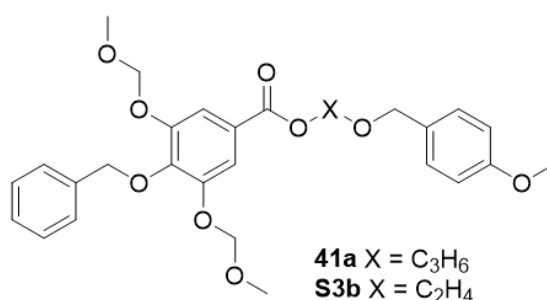

**3-((4-methoxybenzyl)oxy)propyl 4-(benzyloxy)-3,5-bis(methoxymethoxy)benzoate (41a)**, colourless oil,  $^1\text{H-NMR}$  (in  $\text{CDCl}_3$ ) 7.50 (2H, s), 7.47 (2H, d), 7.36-7.31 (3H, m), 7.26 (2H, d), 6.86 (2H, d), 5.18 (4H, s), 5.13 (2H, s), 4.45 (2H, s), 4.40 (2H, t), 3.78 (3H, s), 3.59 (2H, t) 3.48 (6H, s), 2.05 (2H, m).

**2-((4-methoxybenzyl)oxy)ethyl 4-(benzyloxy)-3,5-bis(methoxymethoxy)benzoate (S3b)**, colourless oil,  $^1\text{H-NMR}$  (in  $\text{CDCl}_3$ ) 7.54 (2H, s), 7.47 (2H, dd), 7.36-7.26 (5H, m), 6.87 (2H, d), 5.19 (4H, s), 5.13 (2H, s), 4.54 (2H, s), 4.46 (2H, t), 3.80 (3H, s), 3.76 (2H, t), 3.48 (6H, s).

### Determination of LogP by HPLC

To confirm that the water solubility variation could be partially explained by the molecular behaviour in the solvent, we have experimentally measured the logP of three dimeric structures. Indeed,  $C_{\max}$  value of **22-24** showed a surprising trend as  $24 > 22 > 23$ , while their lipophilicity let expected a different situation with ethane more soluble than the corresponding propane (logP 1.13 and 1.23, respectively). Thus, as their estimated logP value were quite close, it could be possible that their experimental values will explain this situation.

Therefore, we have employed an isocratic HPLC method inspired by the protocol reported by Liang *et al.* (2017).<sup>4</sup> As our compounds belongs to the polyphenols' family, we have first selected references whose the logP value have already been experimentally determined and which are polyphenols. Consequently, we have chosen methyl and propyl gallate, as well as propyl caffeate (logP = 0.77, 1.69 & 2.03, respectively) to establish the calibration curve. All these compounds have been freshly prepared as previously reported and their purity controlled by elemental analysis.<sup>5,6</sup>

Figure 1 Modification of retention time from polyphenolic references with percentage of acetonitrile.

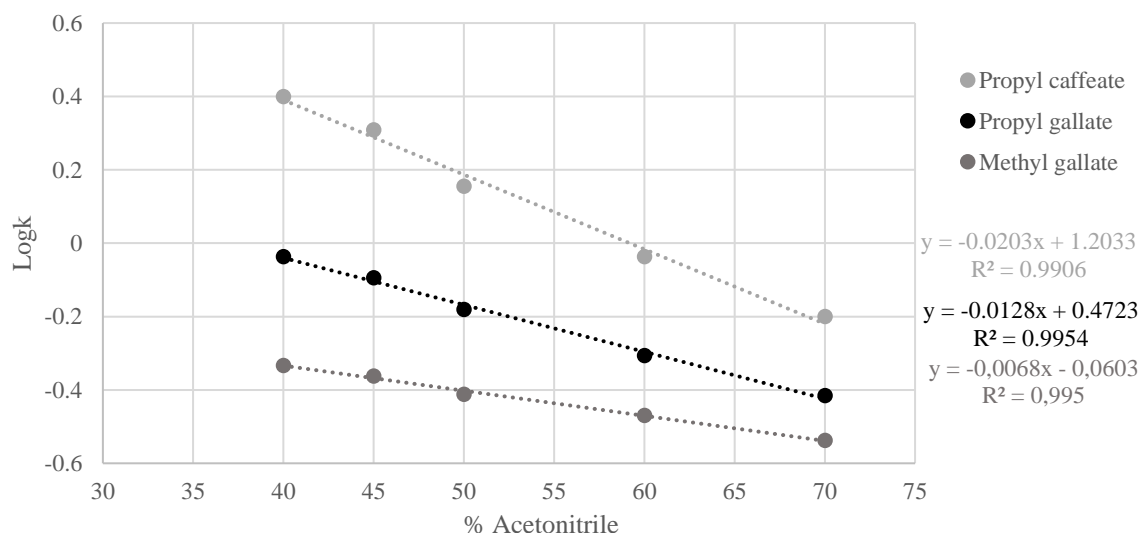

Thanks to their retention time values obtained with several mobile phase ( $H_2O$ /Acetonitrile, from 70/30 to 20/80 + 0.05% TFA), we have first determined a graph of the  $\log(T_R)$  following the organic modifier percentage (Fig. 1). Then, the linear regression allowed to estimate the  $\log(T_R)$  value for 100% water and to draw a graph of  $\log(T_R)$  following the logP value (Fig. 2).

Figure 2 Calibration curve of LogP value with LogTr at 100% water.

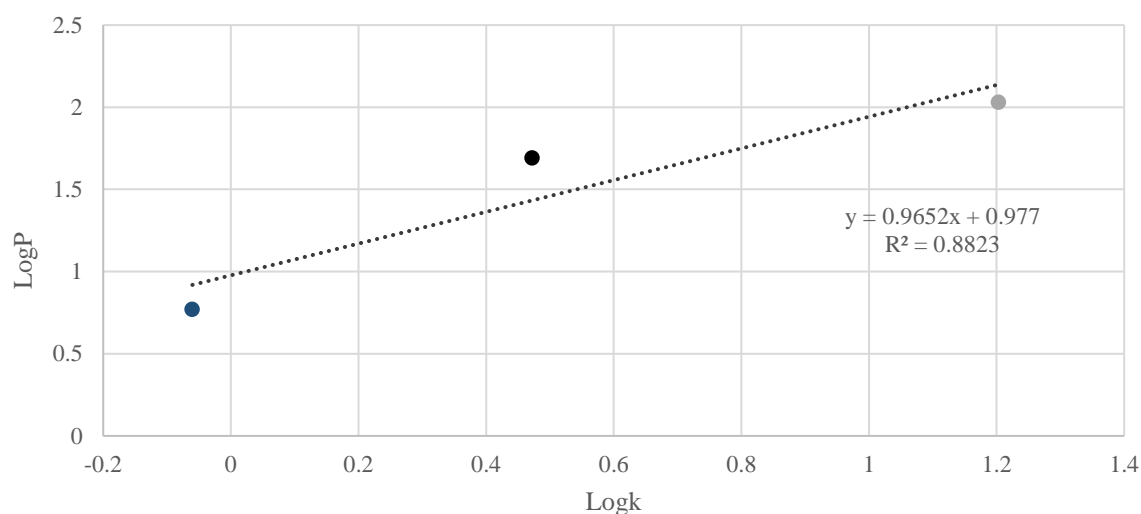

After that, the test compounds have been injected in similar conditions to determine their own  $\log(T_R)$  value in pure water (Fig. 3). Finally, the calibration curve was used to calculate the  $\log P$  value of these compounds. These results were quite similar to the estimated ones according to Chemdraw 12.0 software.

In conclusion, the influence of other parameters that lipophilicity ( $\log P$ ) in the water solubility of the dimeric structures seemed confirmed.

Figure 3 Modification of retention time with percentage of acetonitrile.

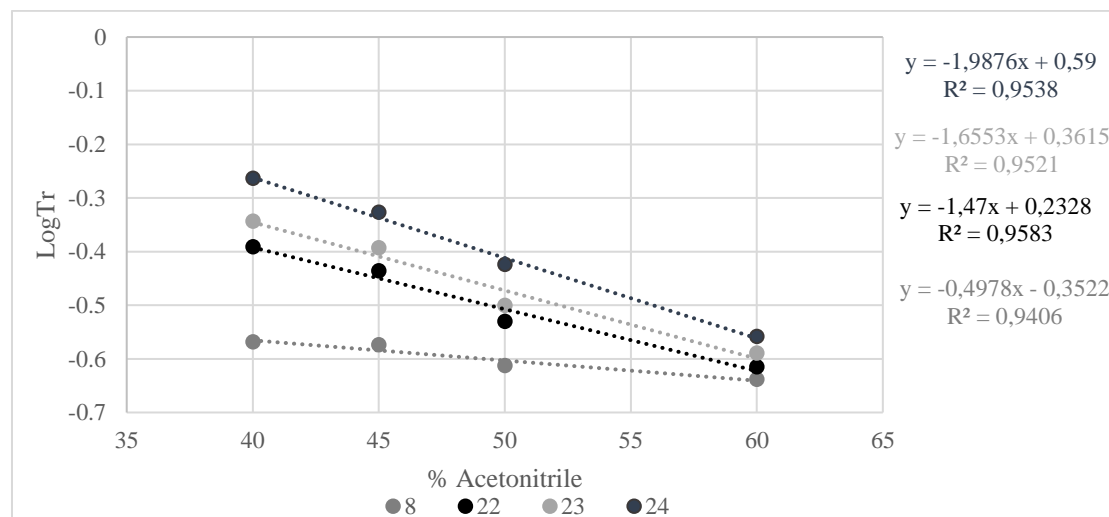

## Biological activities of synthetic intermediates

Table 1 Pharmacological activities and Physical characterization of the reported compounds.

| Compounds       | 3D7 <sup>a</sup>      | FcB1 <sup>b</sup> | W2 <sup>c</sup> | HUVEC <sup>d</sup> | SI   | Solubility <sup>e</sup> | Increment Solubility | cLogP <sup>f</sup> |
|-----------------|-----------------------|-------------------|-----------------|--------------------|------|-------------------------|----------------------|--------------------|
| 9               | 2.8 ± 1.9             | 7.5 ± 2.8         | 8.9 ± 5.9       | > 165              | > 59 | 0.018 ± 0.003           | 1                    | 1.1                |
| 8               | 68 ± 20               | -                 | -               | > 294              | > 4  | 70 ± 8.2                | 3879                 | 0.63 <sup>g</sup>  |
| 35              | 27 ± 1.8              | -                 | -               | 171 ± 43           | 6    | 74 ± 7.7                | 4102                 | 0.77 <sup>h</sup>  |
| 36              | 9.3 ± 3.0             | -                 | -               | > 161              | > 17 | 0.59 ± 0.75             | 32                   | 1.2                |
| 37a             | 56 ± 2.2              | -                 | -               | > 140              | > 3  | 0.46 ± 0.22             | 26                   | 3.6                |
| 37b             | 59 ± 0.49             | -                 | -               | > 129              | > 2  | 0.074 ± 0.049           | 4                    | 2.5                |
| 37d             | > 262                 | -                 | -               | > 131              | -    | -                       | -                    | 0.5                |
| 38a             | 33 ± 5.4              | -                 | -               | > 182              | > 6  | 3.7 ± 0.79              | 206                  | 2.3                |
| 38c             | 17 ± 4                | -                 | -               | 140 ± 4.3          | 8    | 0.005 ± 0.001           | 0.3                  | 3.5                |
| 38b             | 95 ± 15               | -                 | -               | 143 ± 14           | 1.5  | 0.20 ± 0.058            | 11                   | 2.6                |
| 38d             | > 353                 | -                 | -               | -                  | -    | -                       | -                    | 0.6                |
| 39d             | > 316                 | -                 | -               | > 158              | -    | -                       | -                    | 1.2                |
| 39f             | 70 ± 23               | -                 | -               | > 123              | -    | -                       | -                    | 3.3                |
| 40a             | 29 ± 11               | -                 | -               | -                  | -    | 0.65 ± 0.15             | 36                   | 3.2                |
| 40c             | 209 ± 42              | -                 | -               | > 126              | -    | -                       | -                    | 4.2                |
| 40b             | > 264                 | -                 | -               | > 132              | -    | -                       | -                    | 3.1                |
| 40d             | > 269                 | -                 | -               | -                  | -    | -                       | -                    | 1.1                |
| 40f             | > 255                 | -                 | -               | > 127              | -    | -                       | -                    | 3                  |
| 41a             | > 190                 | -                 | -               | -                  | -    | -                       | -                    | 5                  |
| 42a             | 195 ± 39              | -                 | -               | -                  | -    | -                       | -                    | 4                  |
| 11              | 4.5 ± 3.1             | -                 | -               | -                  | -    | 0.003 ± 0.00006         | 0.2                  | 6.7                |
| 12              | 21 ± 1.1              | -                 | -               | -                  | -    | -                       | -                    | -                  |
| 17              | 1.8 ± 0.9             | 1.7 ± 1.1         | 1.9 ± 1.1       | 14 ± 5.8           | 8    | 0.026 ± 0.004           | 2                    | 5.2                |
| 18              | 0.9 ± 0.4             | 0.9 ± 0.2         | 0.4 ± 0.2       | 6.9 ± 0.2          | 5    | -                       | -                    | 7.2                |
| 19              | 3.2 ± 0.96            | -                 | -               | 15 ± 3.6           | 5    | -                       | -                    | 4.9                |
| 20              | 4.0 ± 0.7             | 1.1 ± 0.6         | 1.8 ± 1.0       | 9.7 ± 1.0          | 2.4  | -                       | -                    | 6.2                |
| 22              | 3.7 ± 1.1             | 3.7 ± 1.2         | 6.7 ± 3.2       | 69 ± 12            | 19   | 0.43 ± 0.25             | 24                   | 1.04 <sup>g</sup>  |
| 23              | 5.8 ± 1.9             | 3.2 ± 1.4         | 4.1 ± 2.9       | > 132              | > 23 | 2.7 ± 0.64              | 150                  | 1.13 <sup>g</sup>  |
| 24              | 3.7 ± 1.1             | 5.7 ± 3.4         | 5.0 ± 4.2       | > 127              | > 35 | 0.15 ± 0.05             | 8                    | 1.30 <sup>g</sup>  |
| 25              | 5.5 ± 1               | 4.9 ± 2.5         | 7.6 ± 4.4       | 84 ± 5.4           | 41   | 0.28 ± 0.04             | 15                   | 2.4                |
| 26              | 4.6 ± 0.6             | 3.8 ± 2.0         | 3.6 ± 1.2       | -                  | > 21 | 1.2 ± 0.14              | 64                   | 0.6                |
| 27              | 27 ± 1.9              | 11 ± 1.5          | 13 ± 2.4        | 78 ± 41            | 3    | 0.6 ± 0.014             | 33                   | 2                  |
| 28              | > 352                 | -                 | -               | -                  | -    | 0.007 ± 0.004           | 0.4                  | 3.6                |
| 29              | 6.3 ± 4.8             | 4.7 ± 2.9         | 6.8 ± 3.2       | 59 ± 9.9           | 11   | 2.1 ± 0.27              | 114                  | 1.6                |
| 30              | 9.9 ± 3.2             | 26 ± 6.7          | 12 ± 1.5        | 130 ± 6.8          | 28   | 0.61 ± 0.006            | 34                   | 1.6                |
| 31              | 2.1 ± 1.0             | 3.7 ± 1.9         | 3.4 ± 0.9       | 54 ± 2.5           | 6    | 0.30 ± 0.11             | 16                   | 2.0                |
| 32              | 3.9 ± 2.8             | 3.1 ± 1.1         | 2.9 ± 0.7       | > 121              | > 13 | 0.066 ± 0.003           | 4                    | -0.1               |
| 33              | 9.0 ± 4.3             | -                 | -               | > 144              | > 42 | 0.033 ± 0.008           | 2                    | 2                  |
| 34              | 20 ± 3.0              | 4.3 ± 1.7         | 7.6 ± 4.5       | > 118              | > 14 | -                       | -                    | 0.98               |
| Artemisinin (1) | 13 ± 3.5 <sup>h</sup> | 17 ± 6            | 24 ± 5          | -                  | -    | -                       | -                    | 2.9                |
| Quinine (6)     | 0.60 ± 0.12           | -                 | -               | -                  | -    | -                       | 86                   | 3.4                |
| Chloroquine (7) | 0.5 ± 0.2             | 1.9 ± 0.3         | 1.5 ± 0.9       | -                  | -    | -                       | -                    | -                  |

<sup>a</sup> IC<sub>50</sub> value in μM against *Plasmodium falciparum* (chloroquine-sensitive) in triplicate with standard deviation; <sup>b</sup> IC<sub>50</sub> value in μM against *Plasmodium falciparum* (chloroquine-resistant) in triplicate with standard deviation; <sup>c</sup> IC<sub>50</sub> value in μM against *Plasmodium falciparum* (multi-resistant) in triplicate with standard deviation; <sup>d</sup> IC<sub>50</sub> value from cell toxicity assay in triplicate with standard deviation; <sup>e</sup> C<sub>max</sub> value in mM in triplicate with standard deviation; <sup>f</sup> Calculated with ChemDraw 12.0; <sup>g</sup> experimental LogP (Supplementary); <sup>h</sup> IC<sub>50</sub> value in nM on *P. falciparum* in triplicate with standard deviation.

## References

- 1 L. A. Savi, P. C. Leal, T. O. Vieira, R. Rosso, R. J. Nunes, R. A. Yunes, T. B. Crezynski-Pasa, C. R. M. Barardi and C. M. O. Simões, *Arzneimittelforschung*, 2005, **55**, 66–75.
- 2 B. Helferich and F. Vorsatz, *J. für Prakt. Chemie*, 1935, **142**, 191–192.
- 3 T. Hirokane, Y. Hirata, T. Ishimoto, K. Nishii and H. Yamada, *Nat. Commun.*, 2014, **5**, 2017–2019.
- 4 C. Liang, J. qin Qiao and H. zhen Lian, *J. Chromatogr. A*, 2017, **1528**, 25–34.
- 5 G. Degotte, B. Pirotte, M. Frédérick and P. Francotte, *Arch. Pharm. (Weinheim)*, 2021, **354**, 2100190.
- 6 S. G. Alson, O. Jansen, E. Cieckiewicz, H. Rakotoarimanana, H. Rafatro, G. Degotte, P. Francotte and M. Frederich, *J. Pharm. Pharmacol.*, 2018, **70**, 1349–1356.

## UV spectra

### Gallic acid (8)

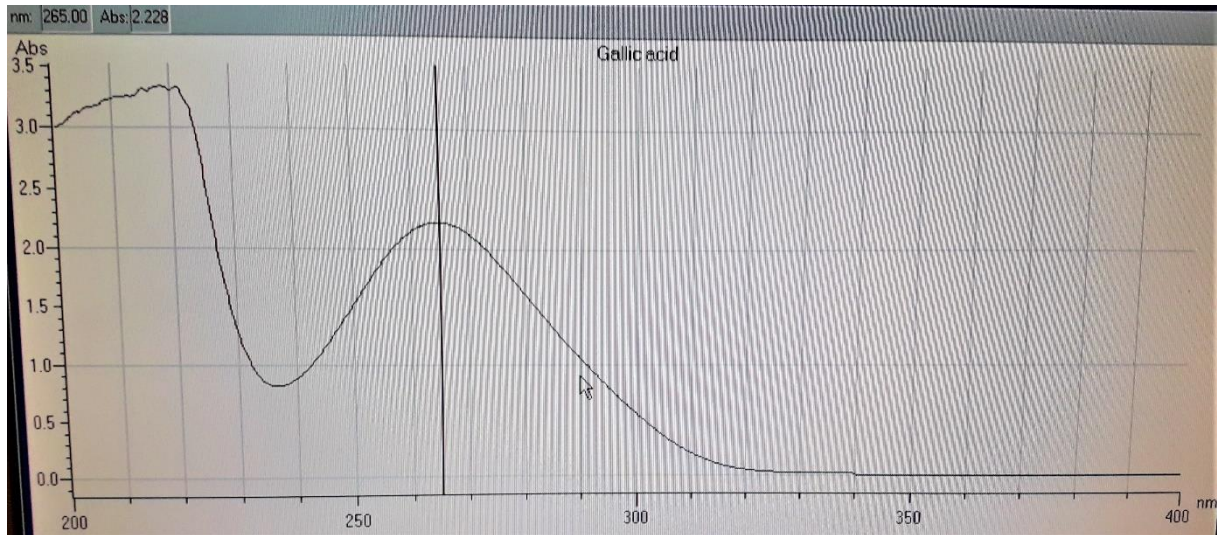

### Ellagic acid (9)

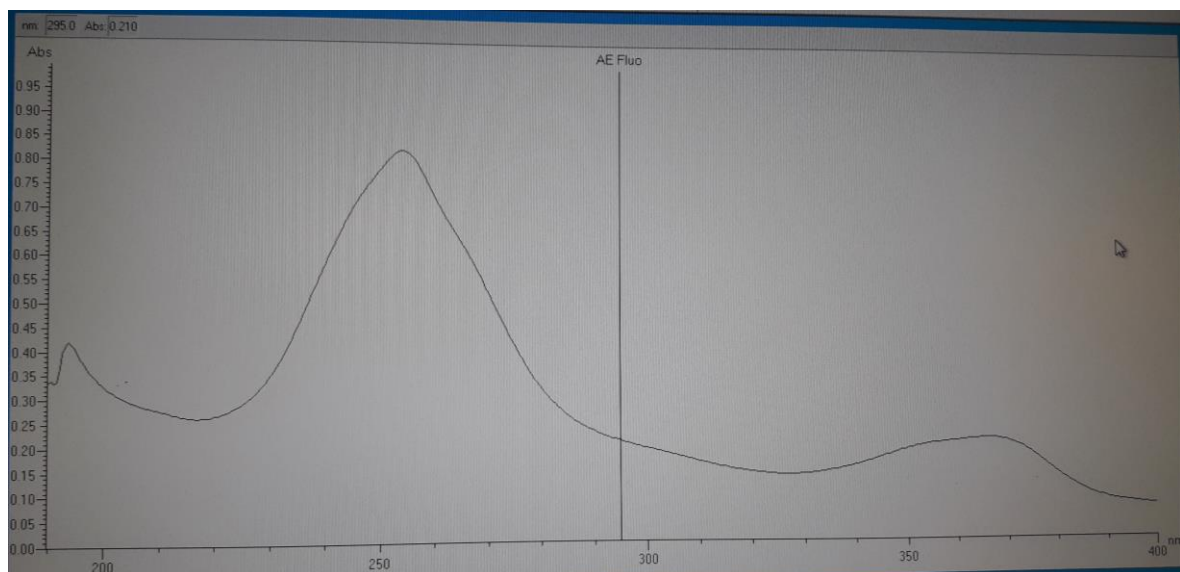



Propane-1,3-diyl bis(4-(benzyloxy)-3,5-dihydroxybenzoate) (**17**)

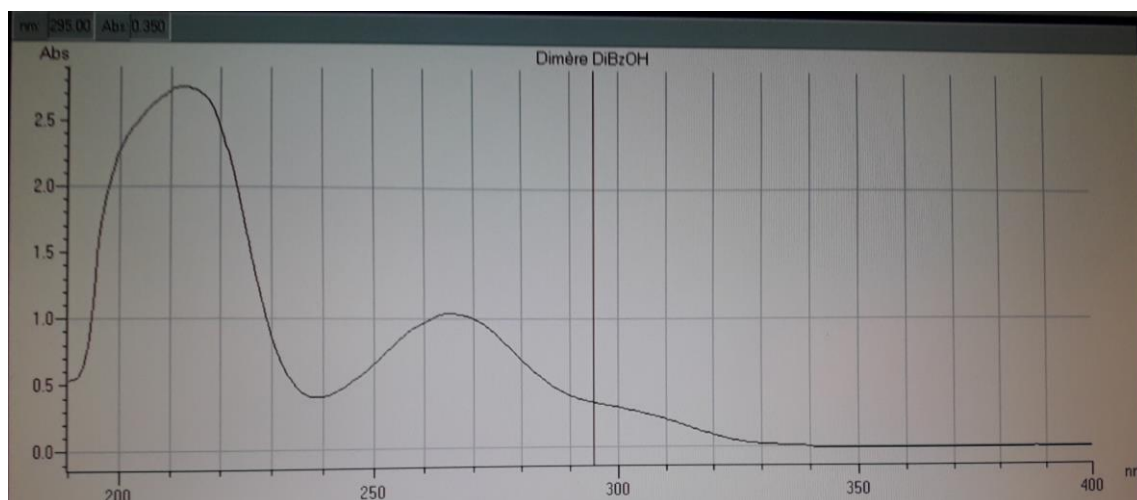

Ethane-1,2-diyl bis(3,4,5-trihydroxybenzoate) (**22**)

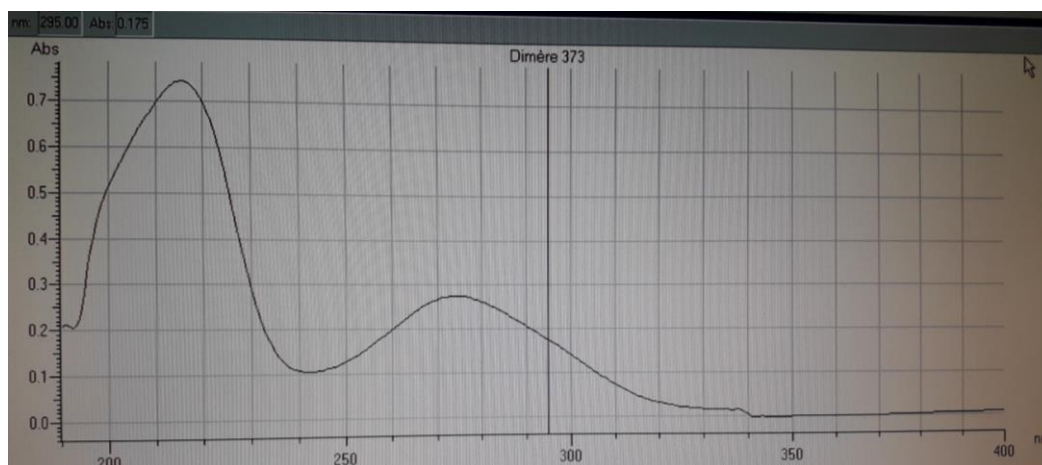

Propane-1,3-diyl bis(3,4,5-trihydroxybenzoate) (**23**)

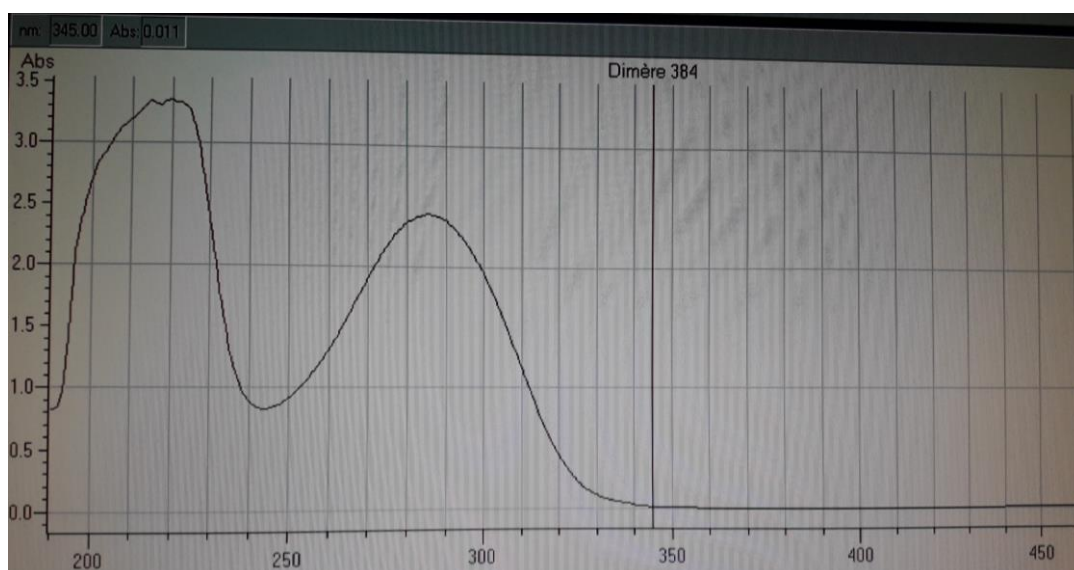

Butane-1,4-diyl bis(3,4,5-trihydroxybenzoate) (**24**)

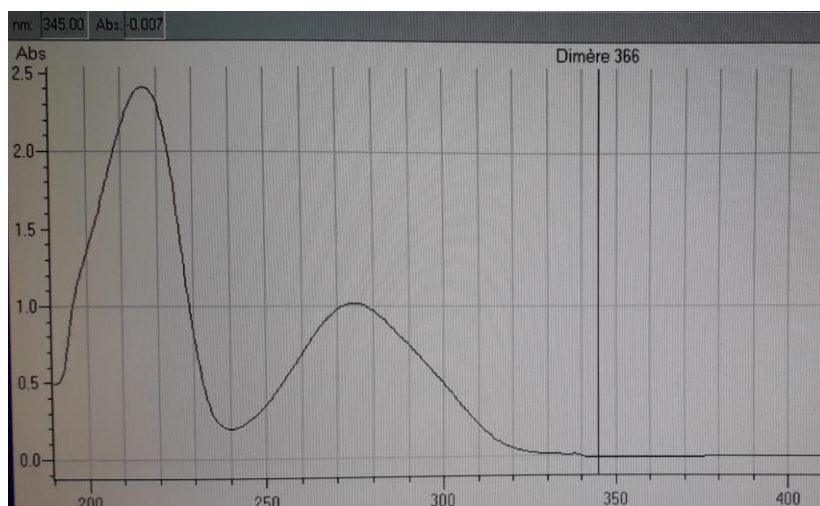

3-((3,4-dihydroxybenzoyl)oxy)propyl 3,4,5-trihydroxybenzoate (**25**)

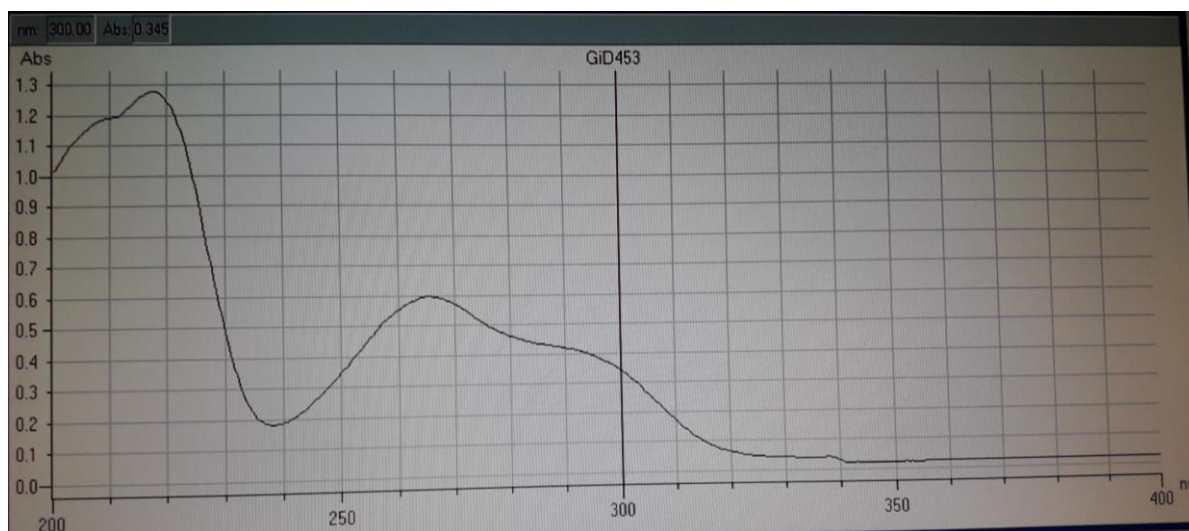

3-((3,5-dihydroxybenzoyl)oxy)propyl 3,4,5-trihydroxybenzoate (**26**)

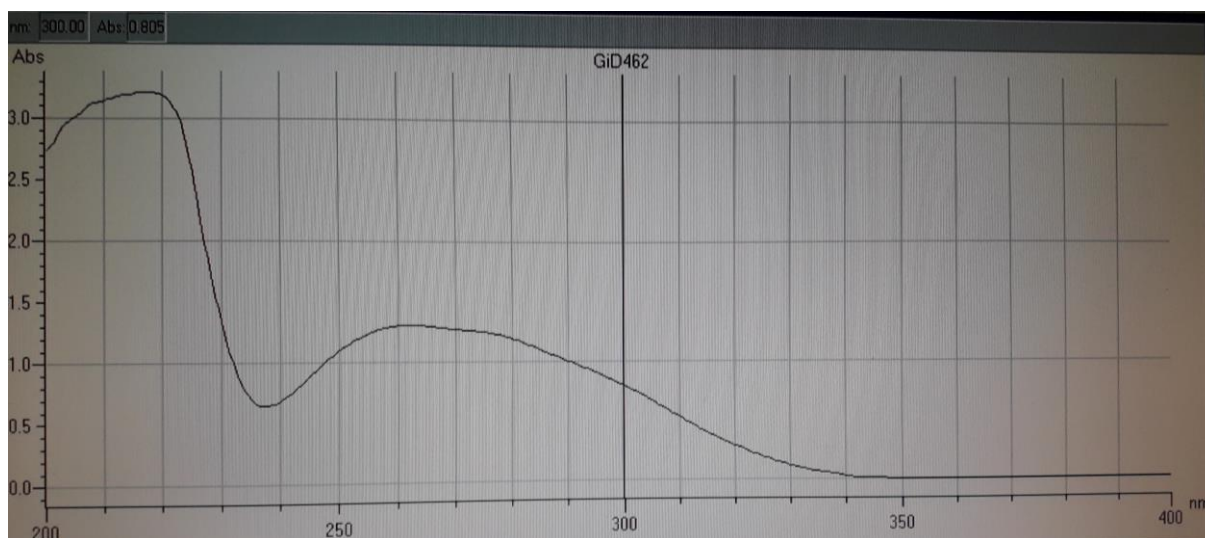

3-(benzyloxy)propyl-3,4,5-trihydroxybenzoate (**27**)

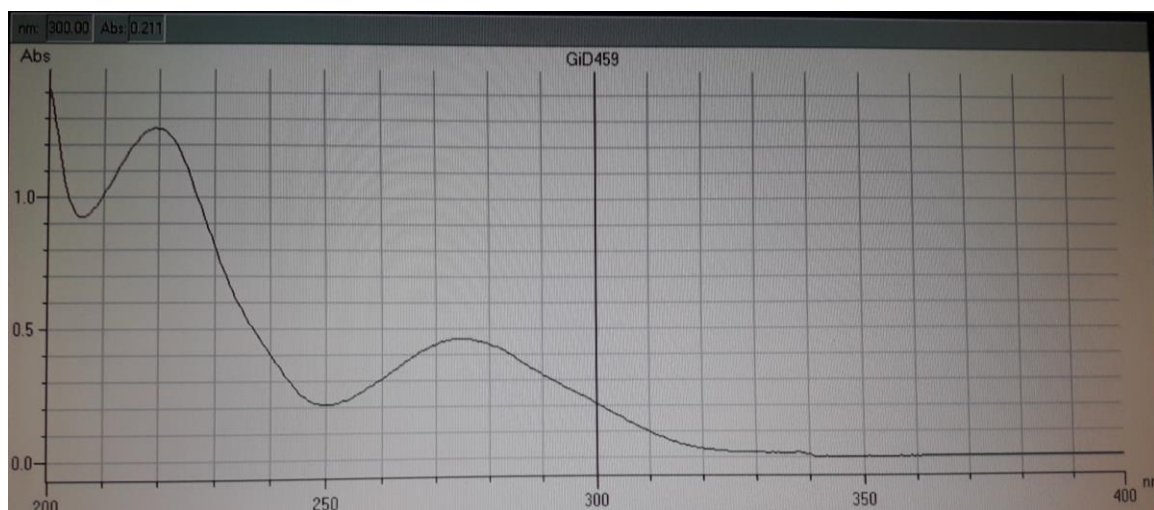

Propane-1,3-diyl dibenzoate (**28**)

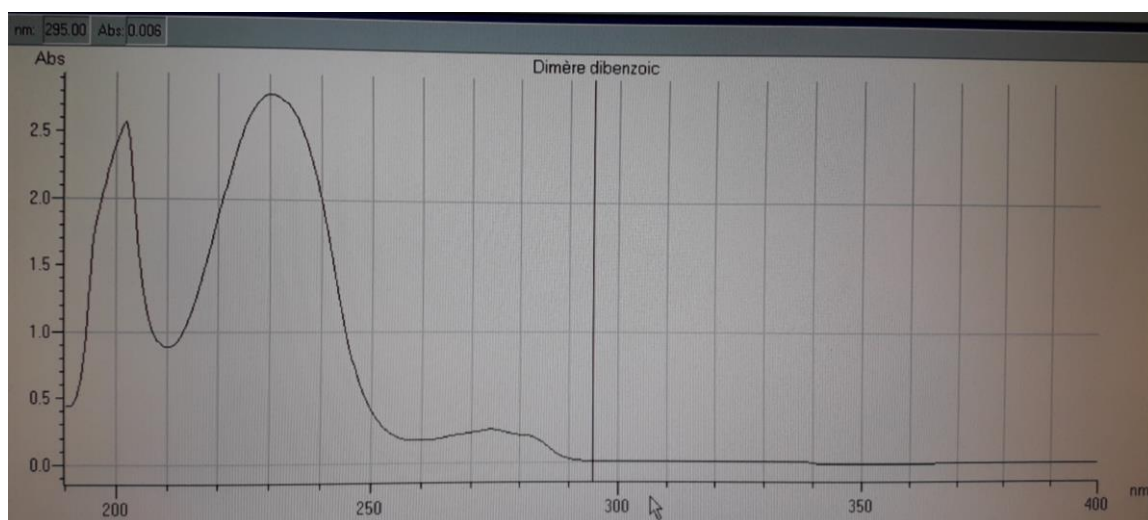

3-(3,4,5-trihydroxybenzamido)propyl 3,4,5-trihydroxybenzoate (**29**)

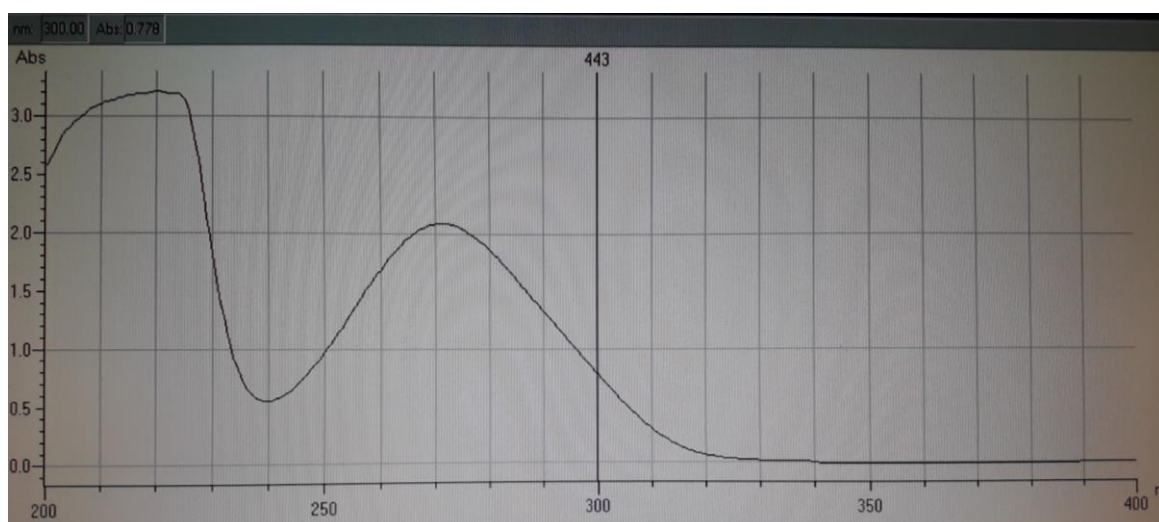



*N,N'*-(propane-1,3-diyl)bis(3,4,5-trihydroxybenzamide) (**30**)

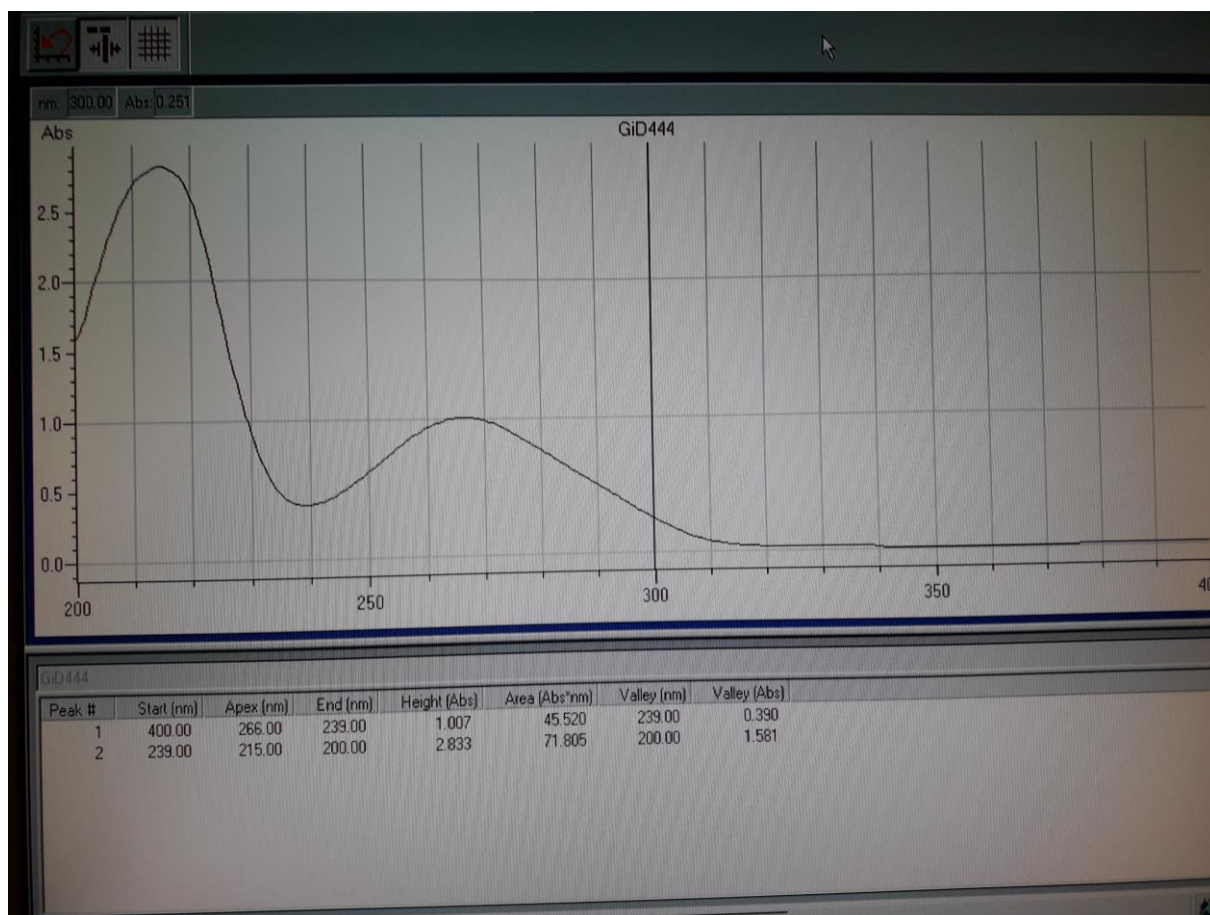

3-(3,4,5-trihydroxybenzamido)phenyl 3,4,5-trihydroxybenzoate (**31**)

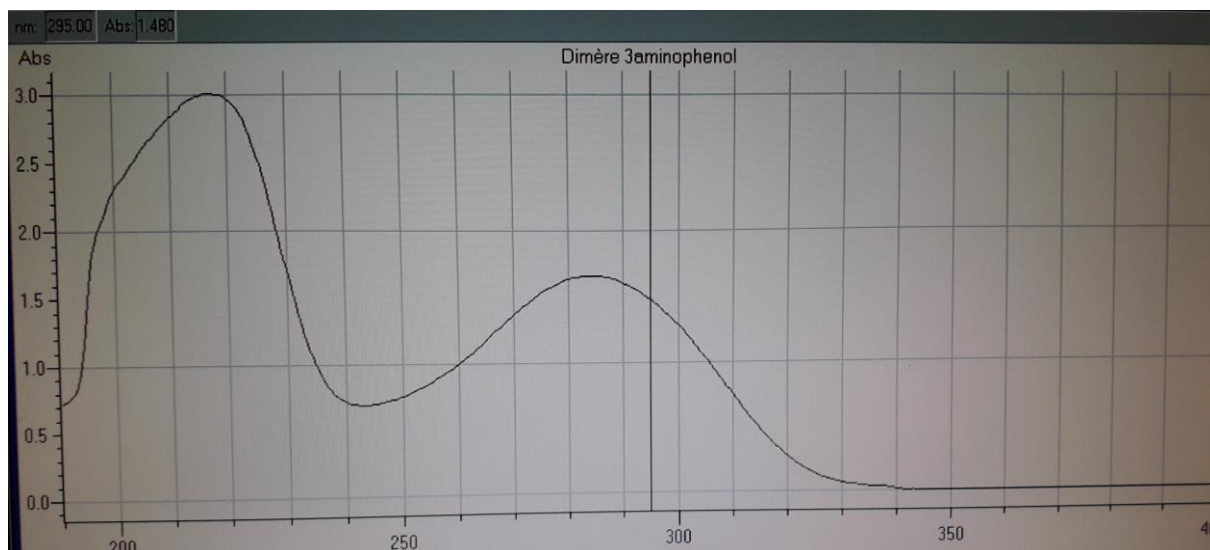

4-(3,4,5-trihydroxybenzamido)phenyl 3,4,5-trihydroxybenzoate (32)

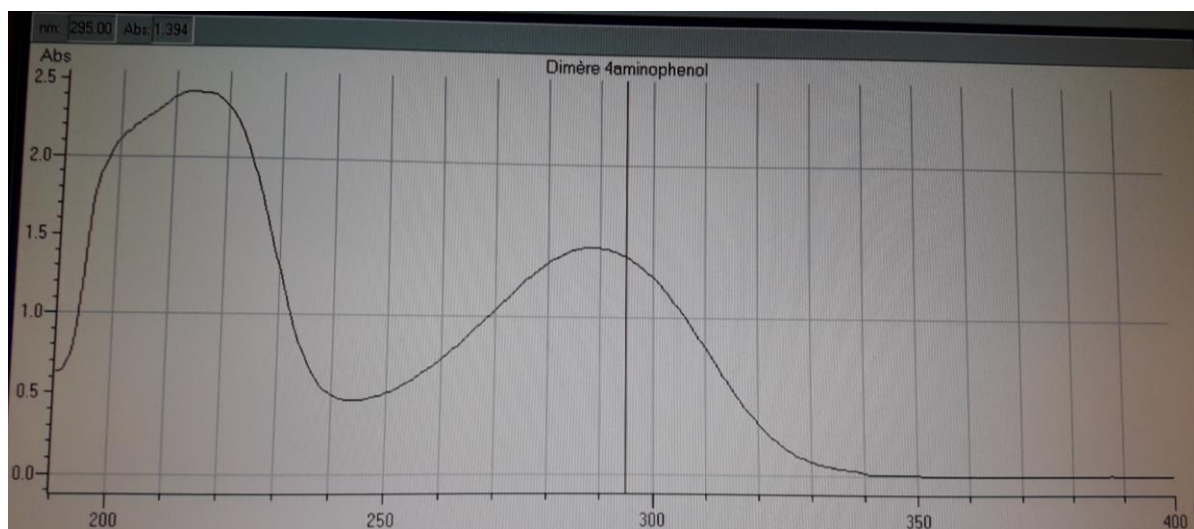

Propane-1,3-diyl bis(3,4-dihydroxybenzoate)(33)

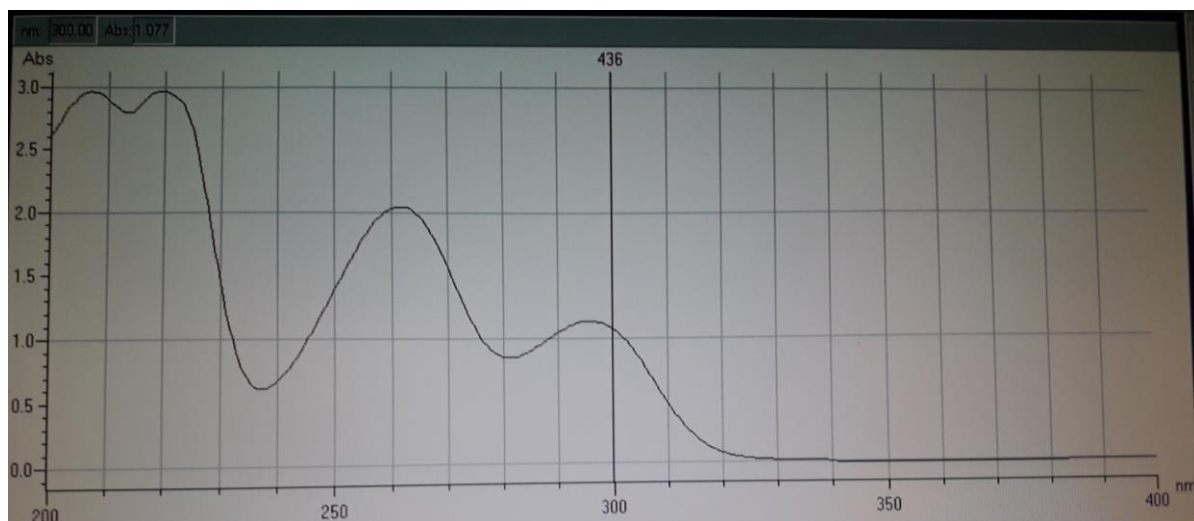

Methyl gallate (35)

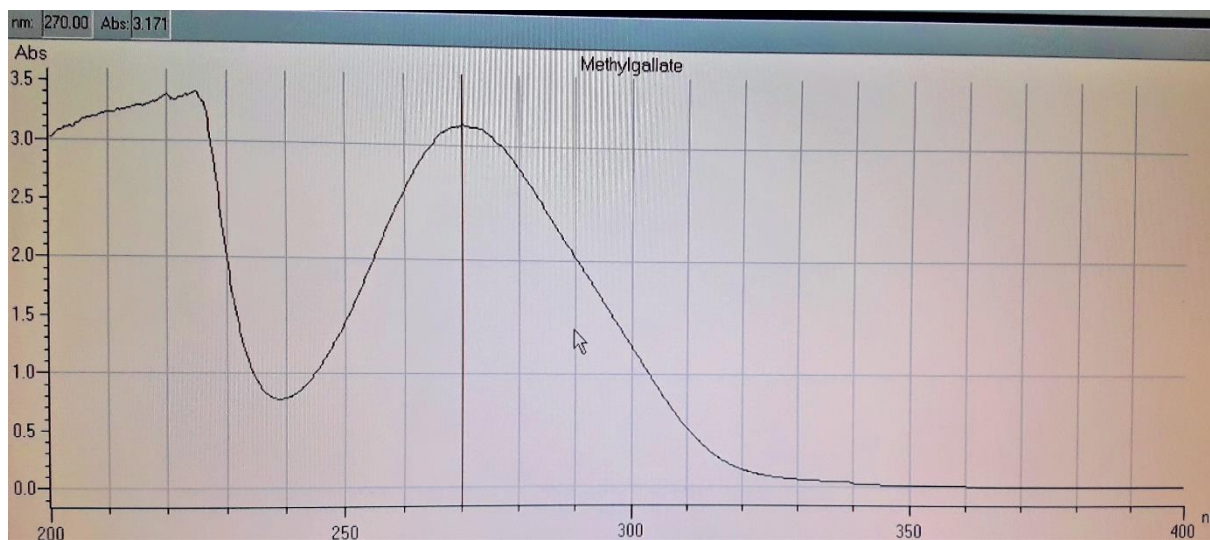

## Propyl gallate

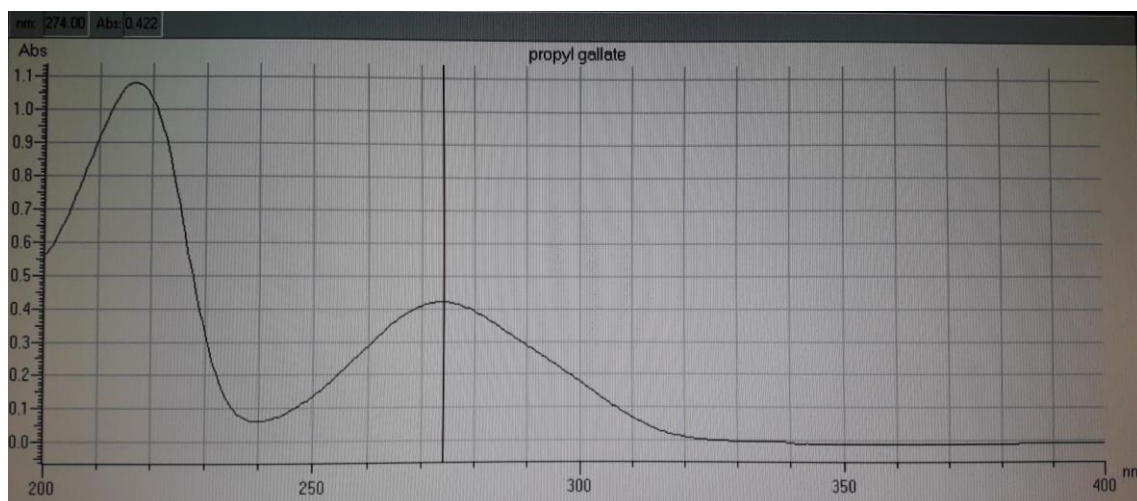

## Methyl 3,4,5-triacetoxybenzoate (36)

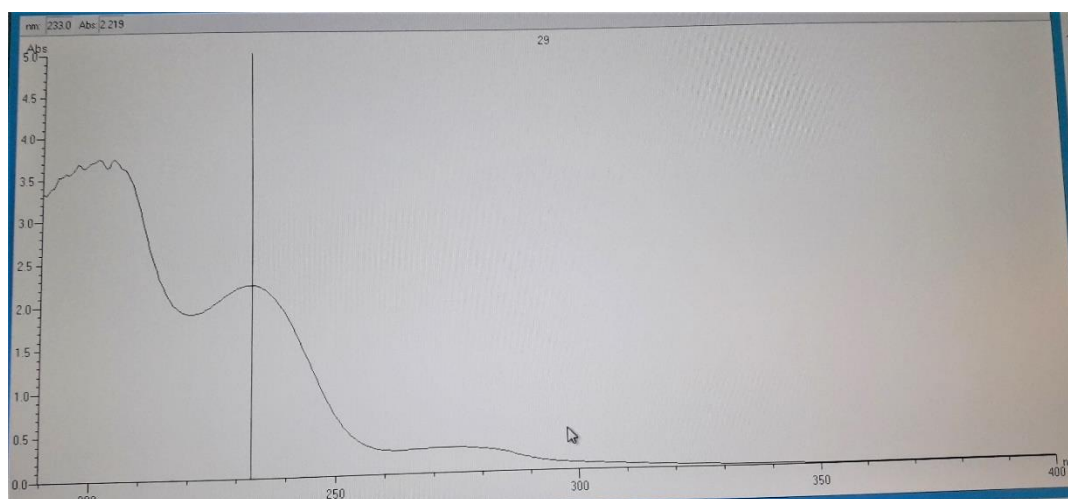

## Methyl 4-benzyloxy-3,5-diacetoxybenzoate (37a)

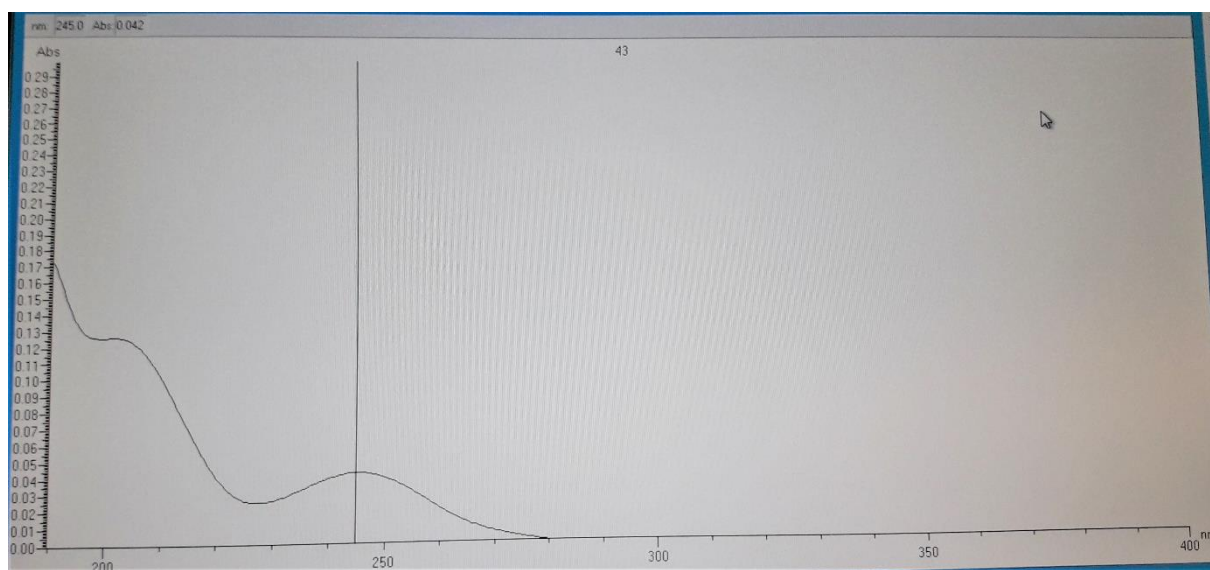



Methyl 4-benzoxy-3,5-dihydroxybenzoate (**38a**)

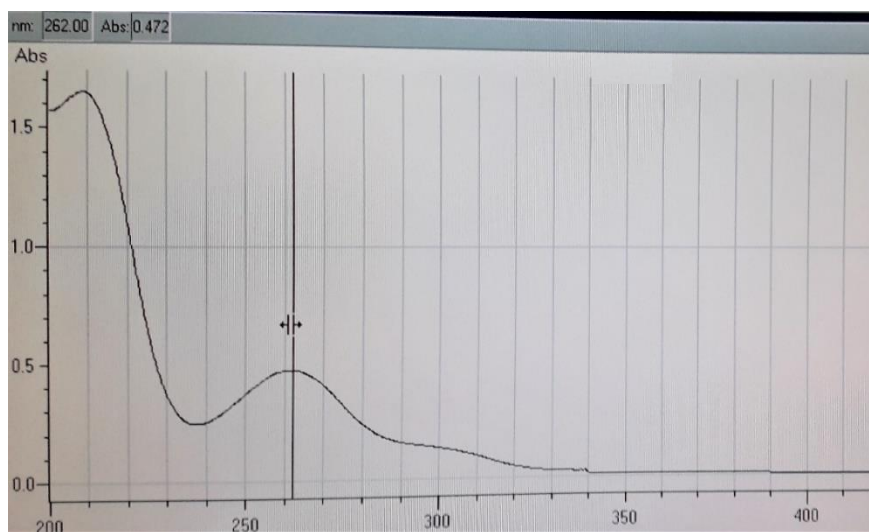

Methyl 4-naphthyl-3,5-dihydroxybenzoate (**38c**)

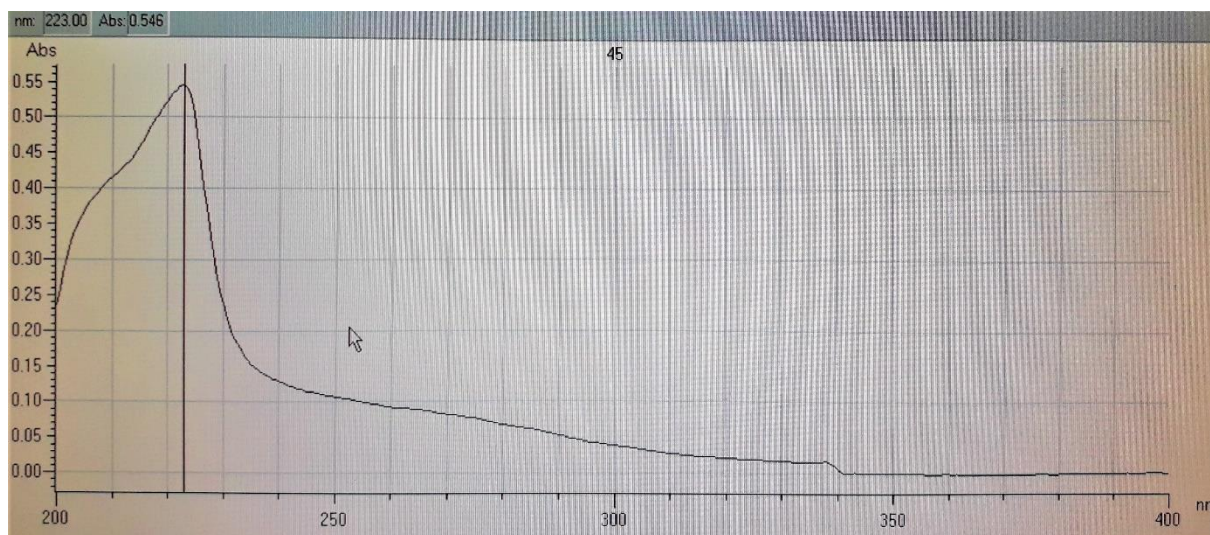

Propyl caffeate

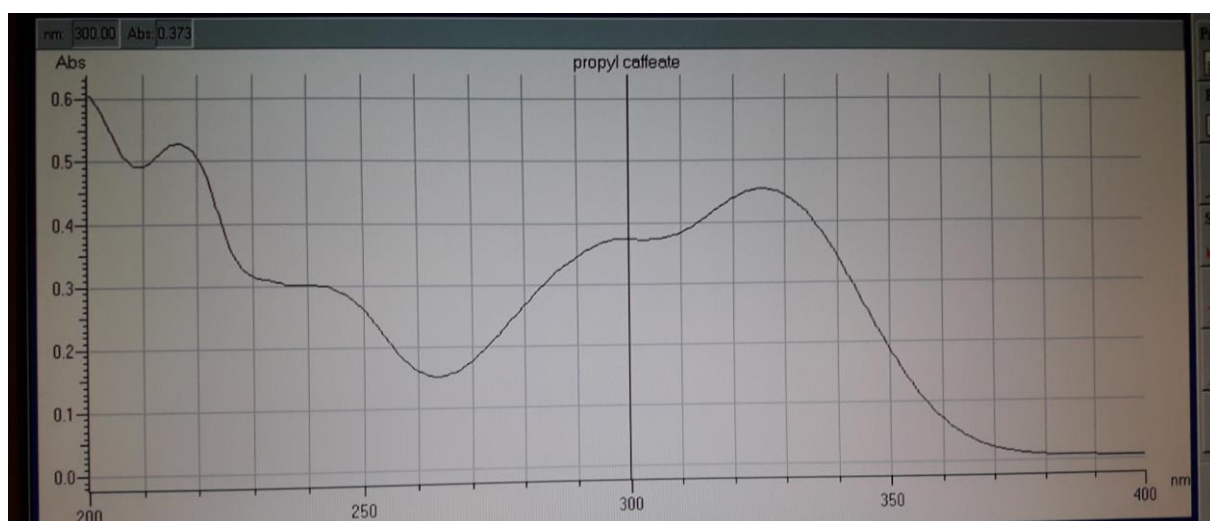

4-(benzyloxy)-3,5-bis(methoxymethoxy)benzoic acid (**40a**)

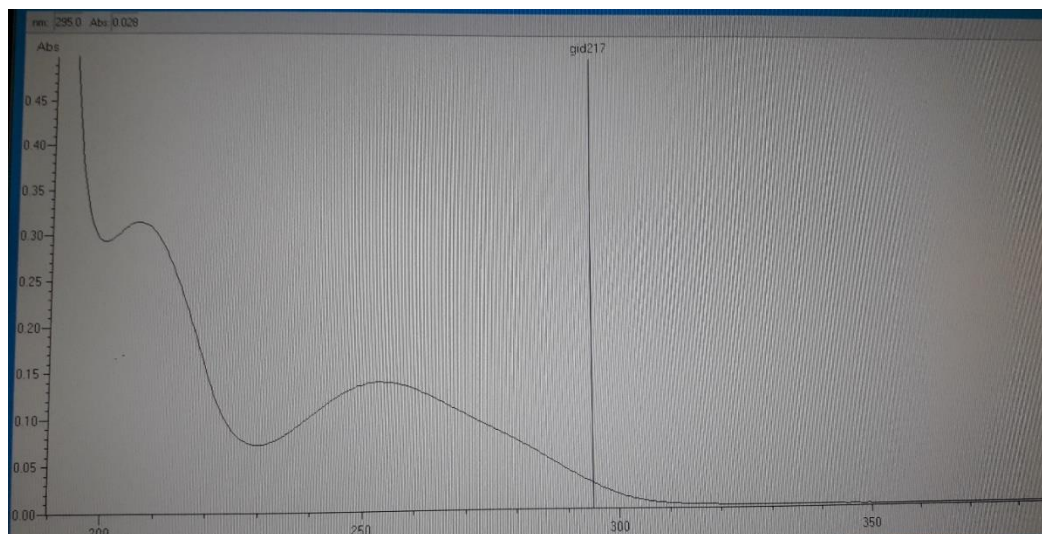

Propane-1,3-diyl bis(4-(benzyloxy)-3,5-bis(methoxymethoxy)benzoate) (**11**)

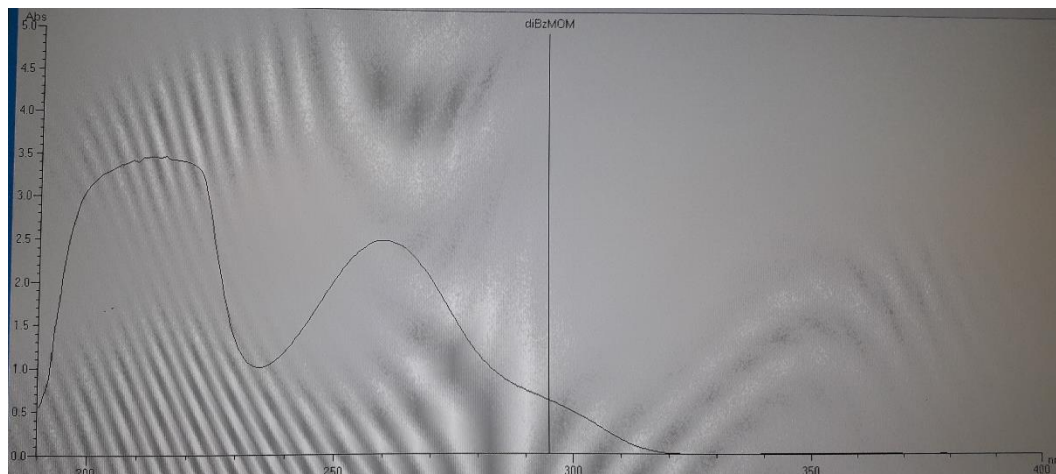

Methyl 4-naphth-2-ylmethoxy-3,5-diacetoxybenzoate (**37c**)

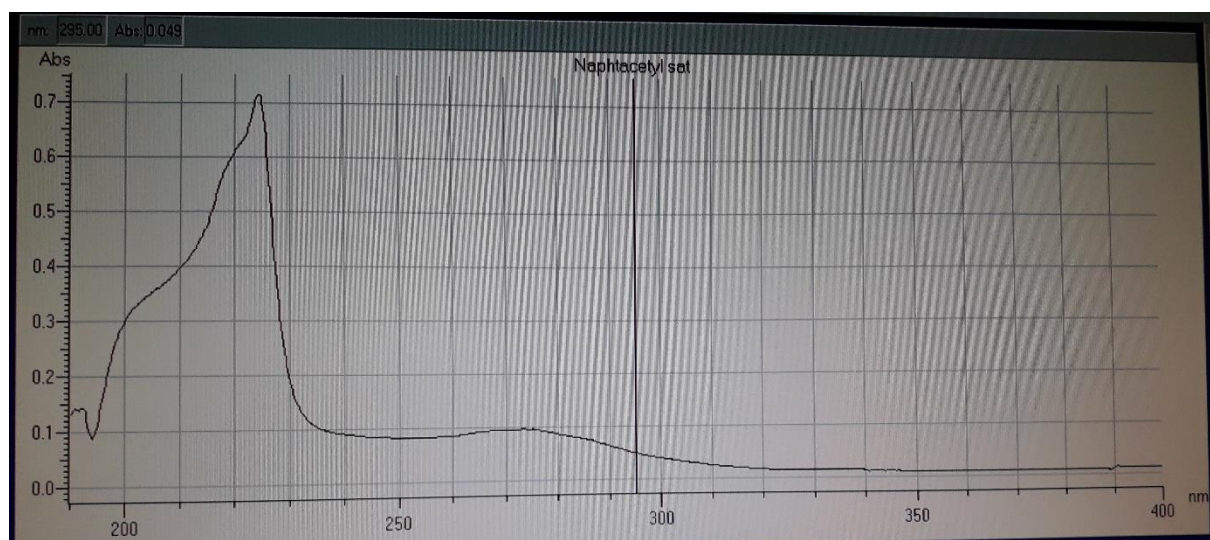



Methyl 4-(4-methoxybenzoxy)-3,5-diacetoxybenzoate (**37b**)

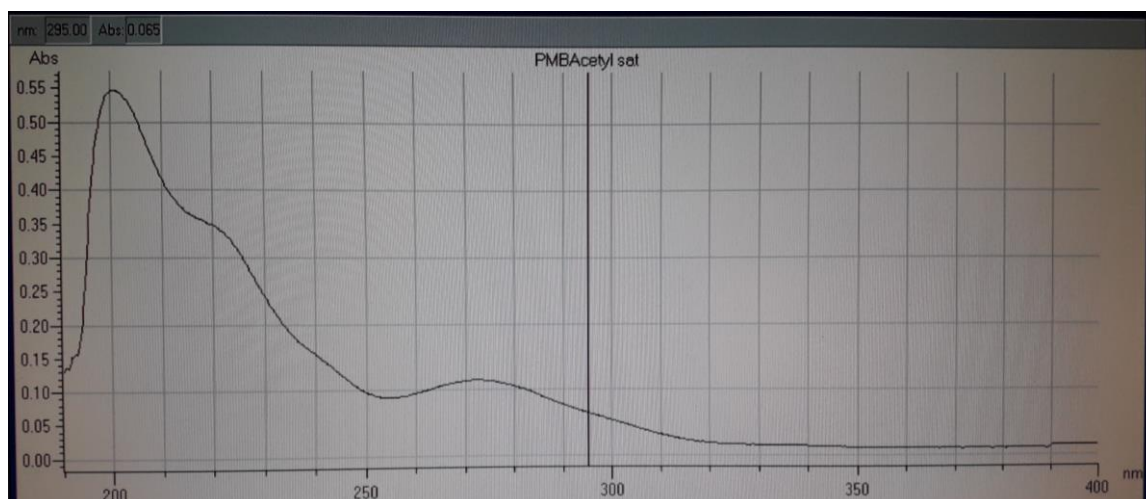

Methyl 4-(4-methoxybenzoxy)-3,5-dihydroxybenzoate (**38b**)

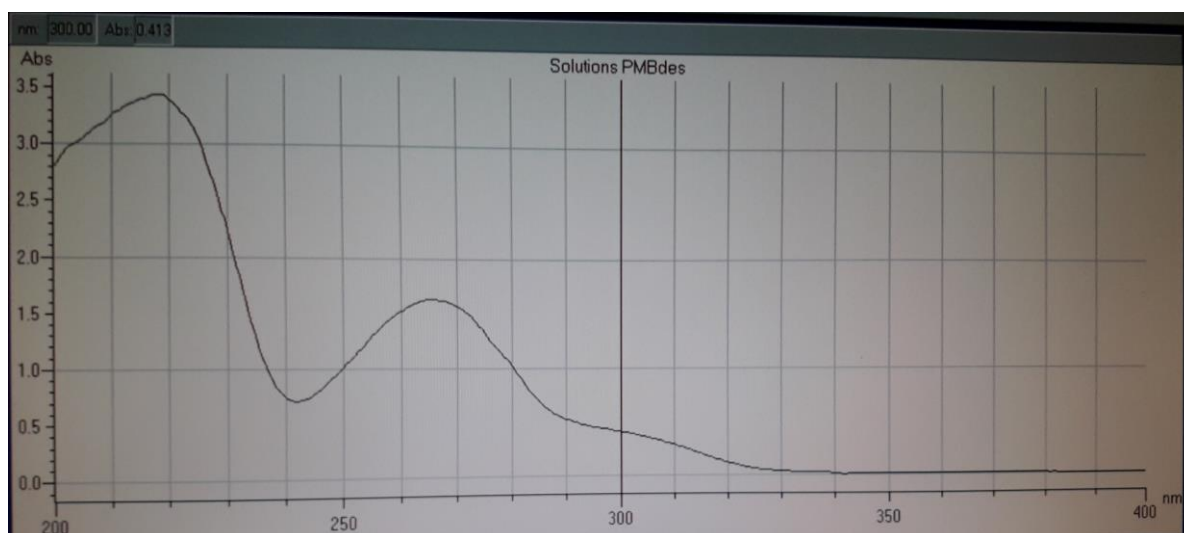

## *NMR Spectra*

EA\_Sigma-Aldrich\_DMSO

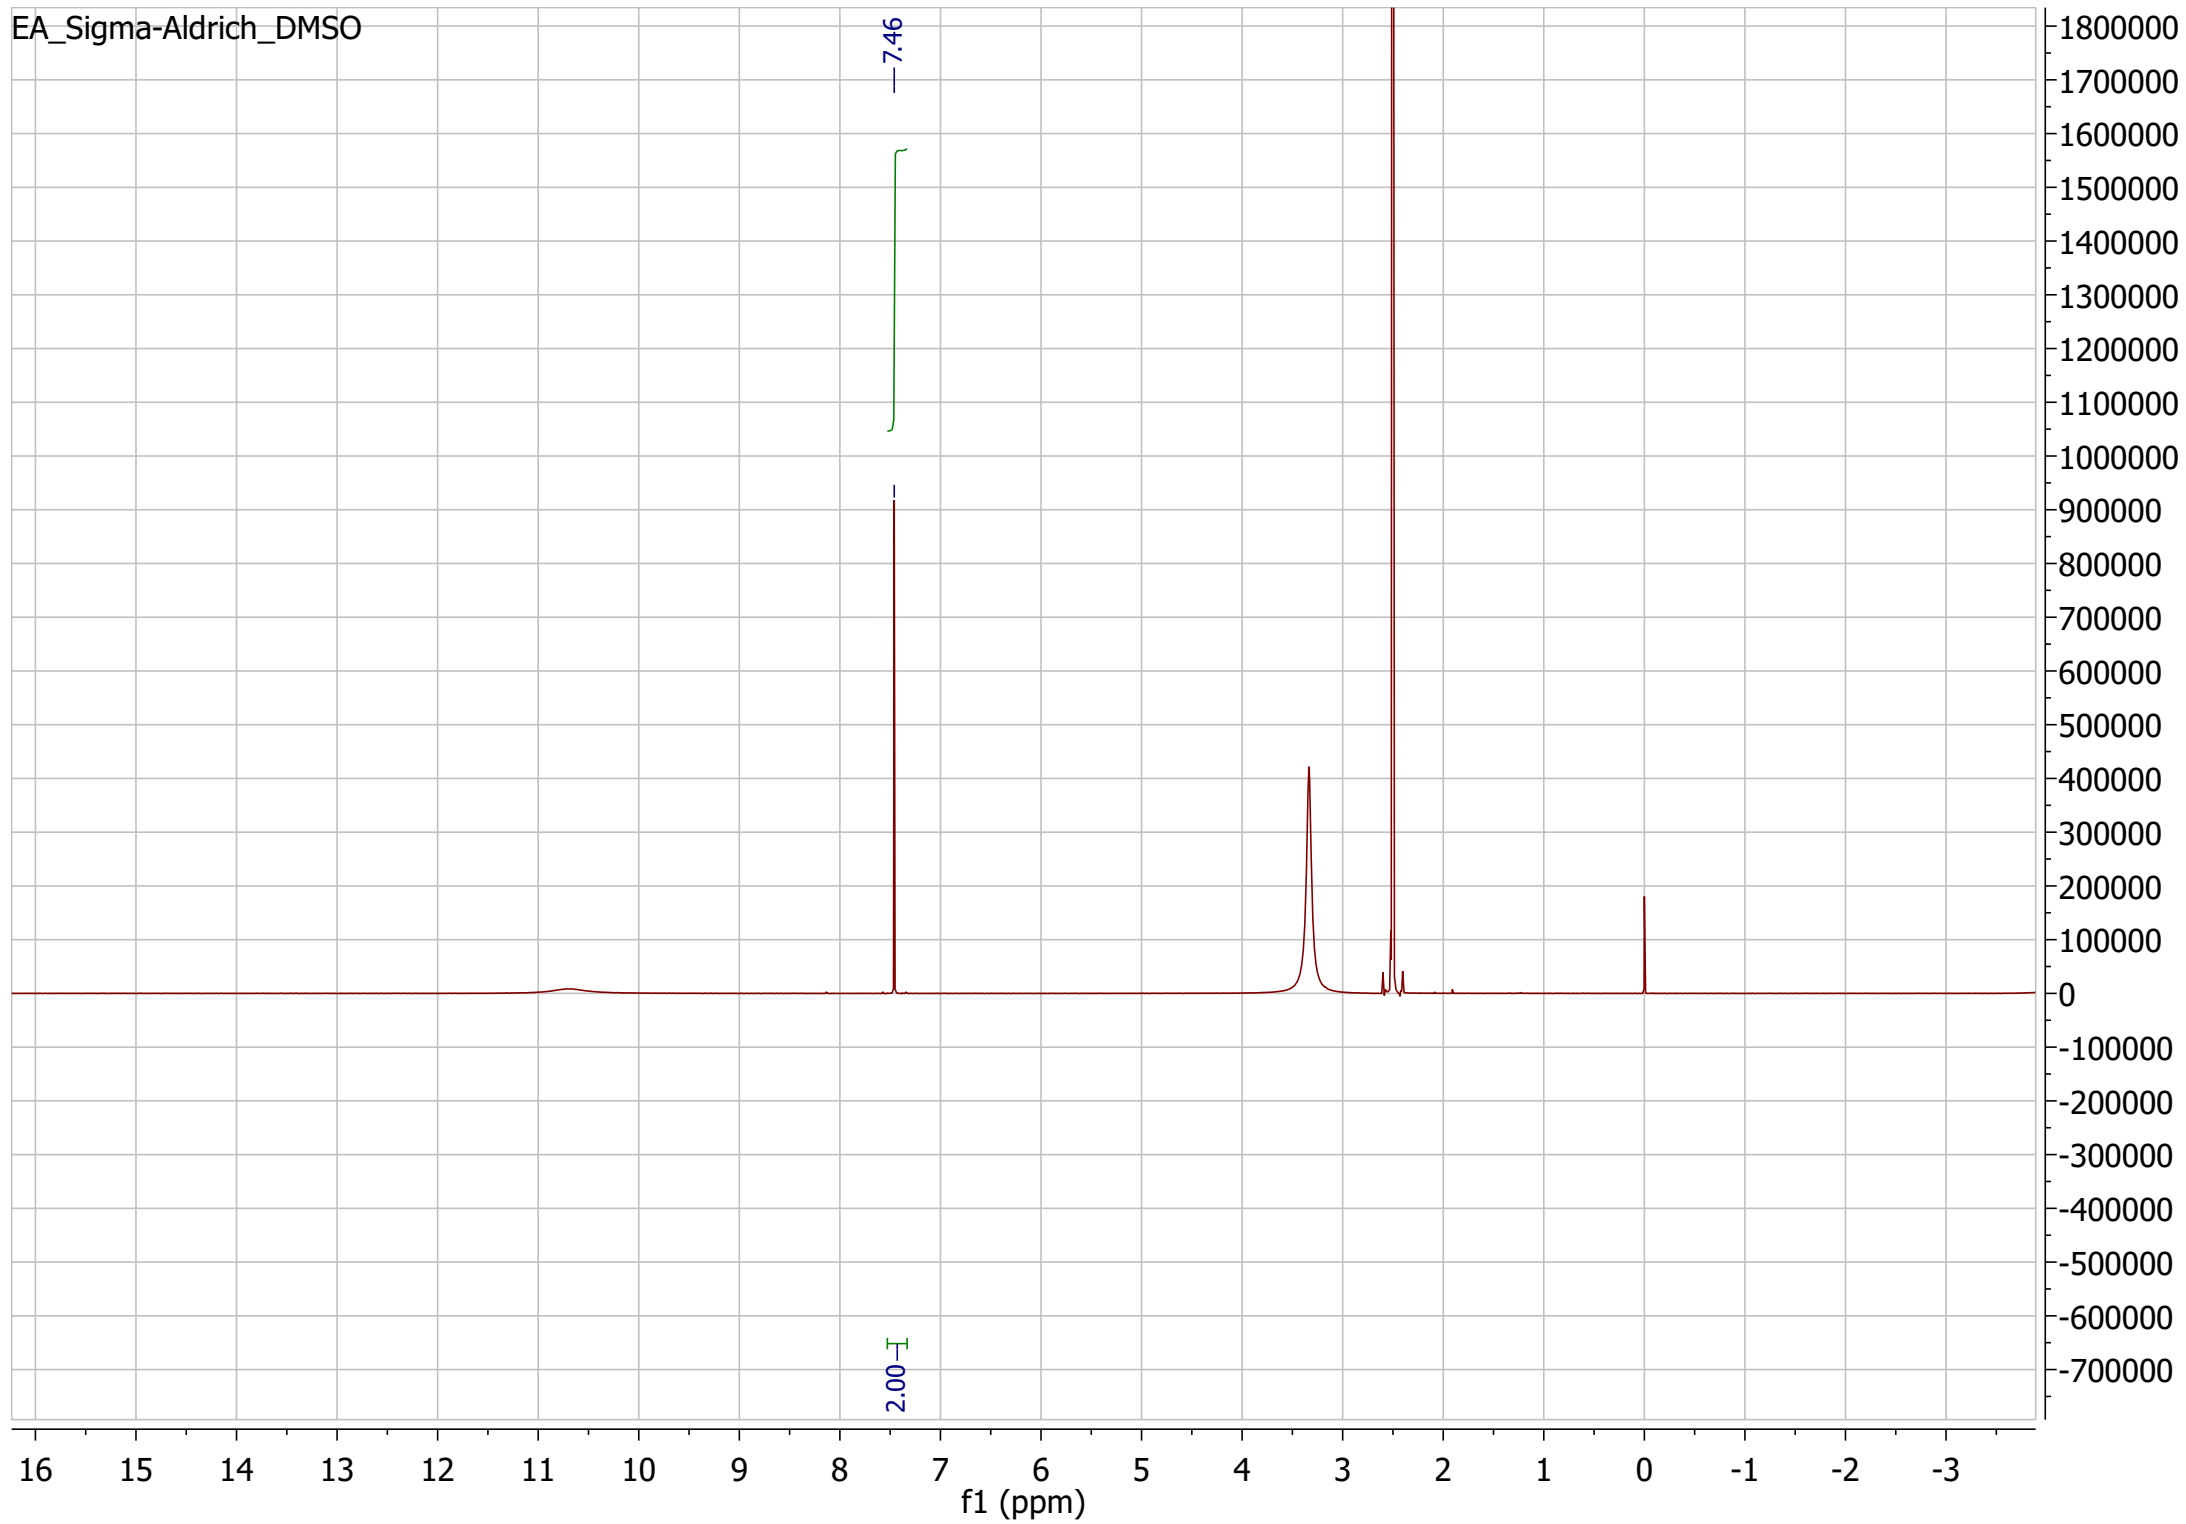

EA\_Sigma-Aldrich\_DMSO

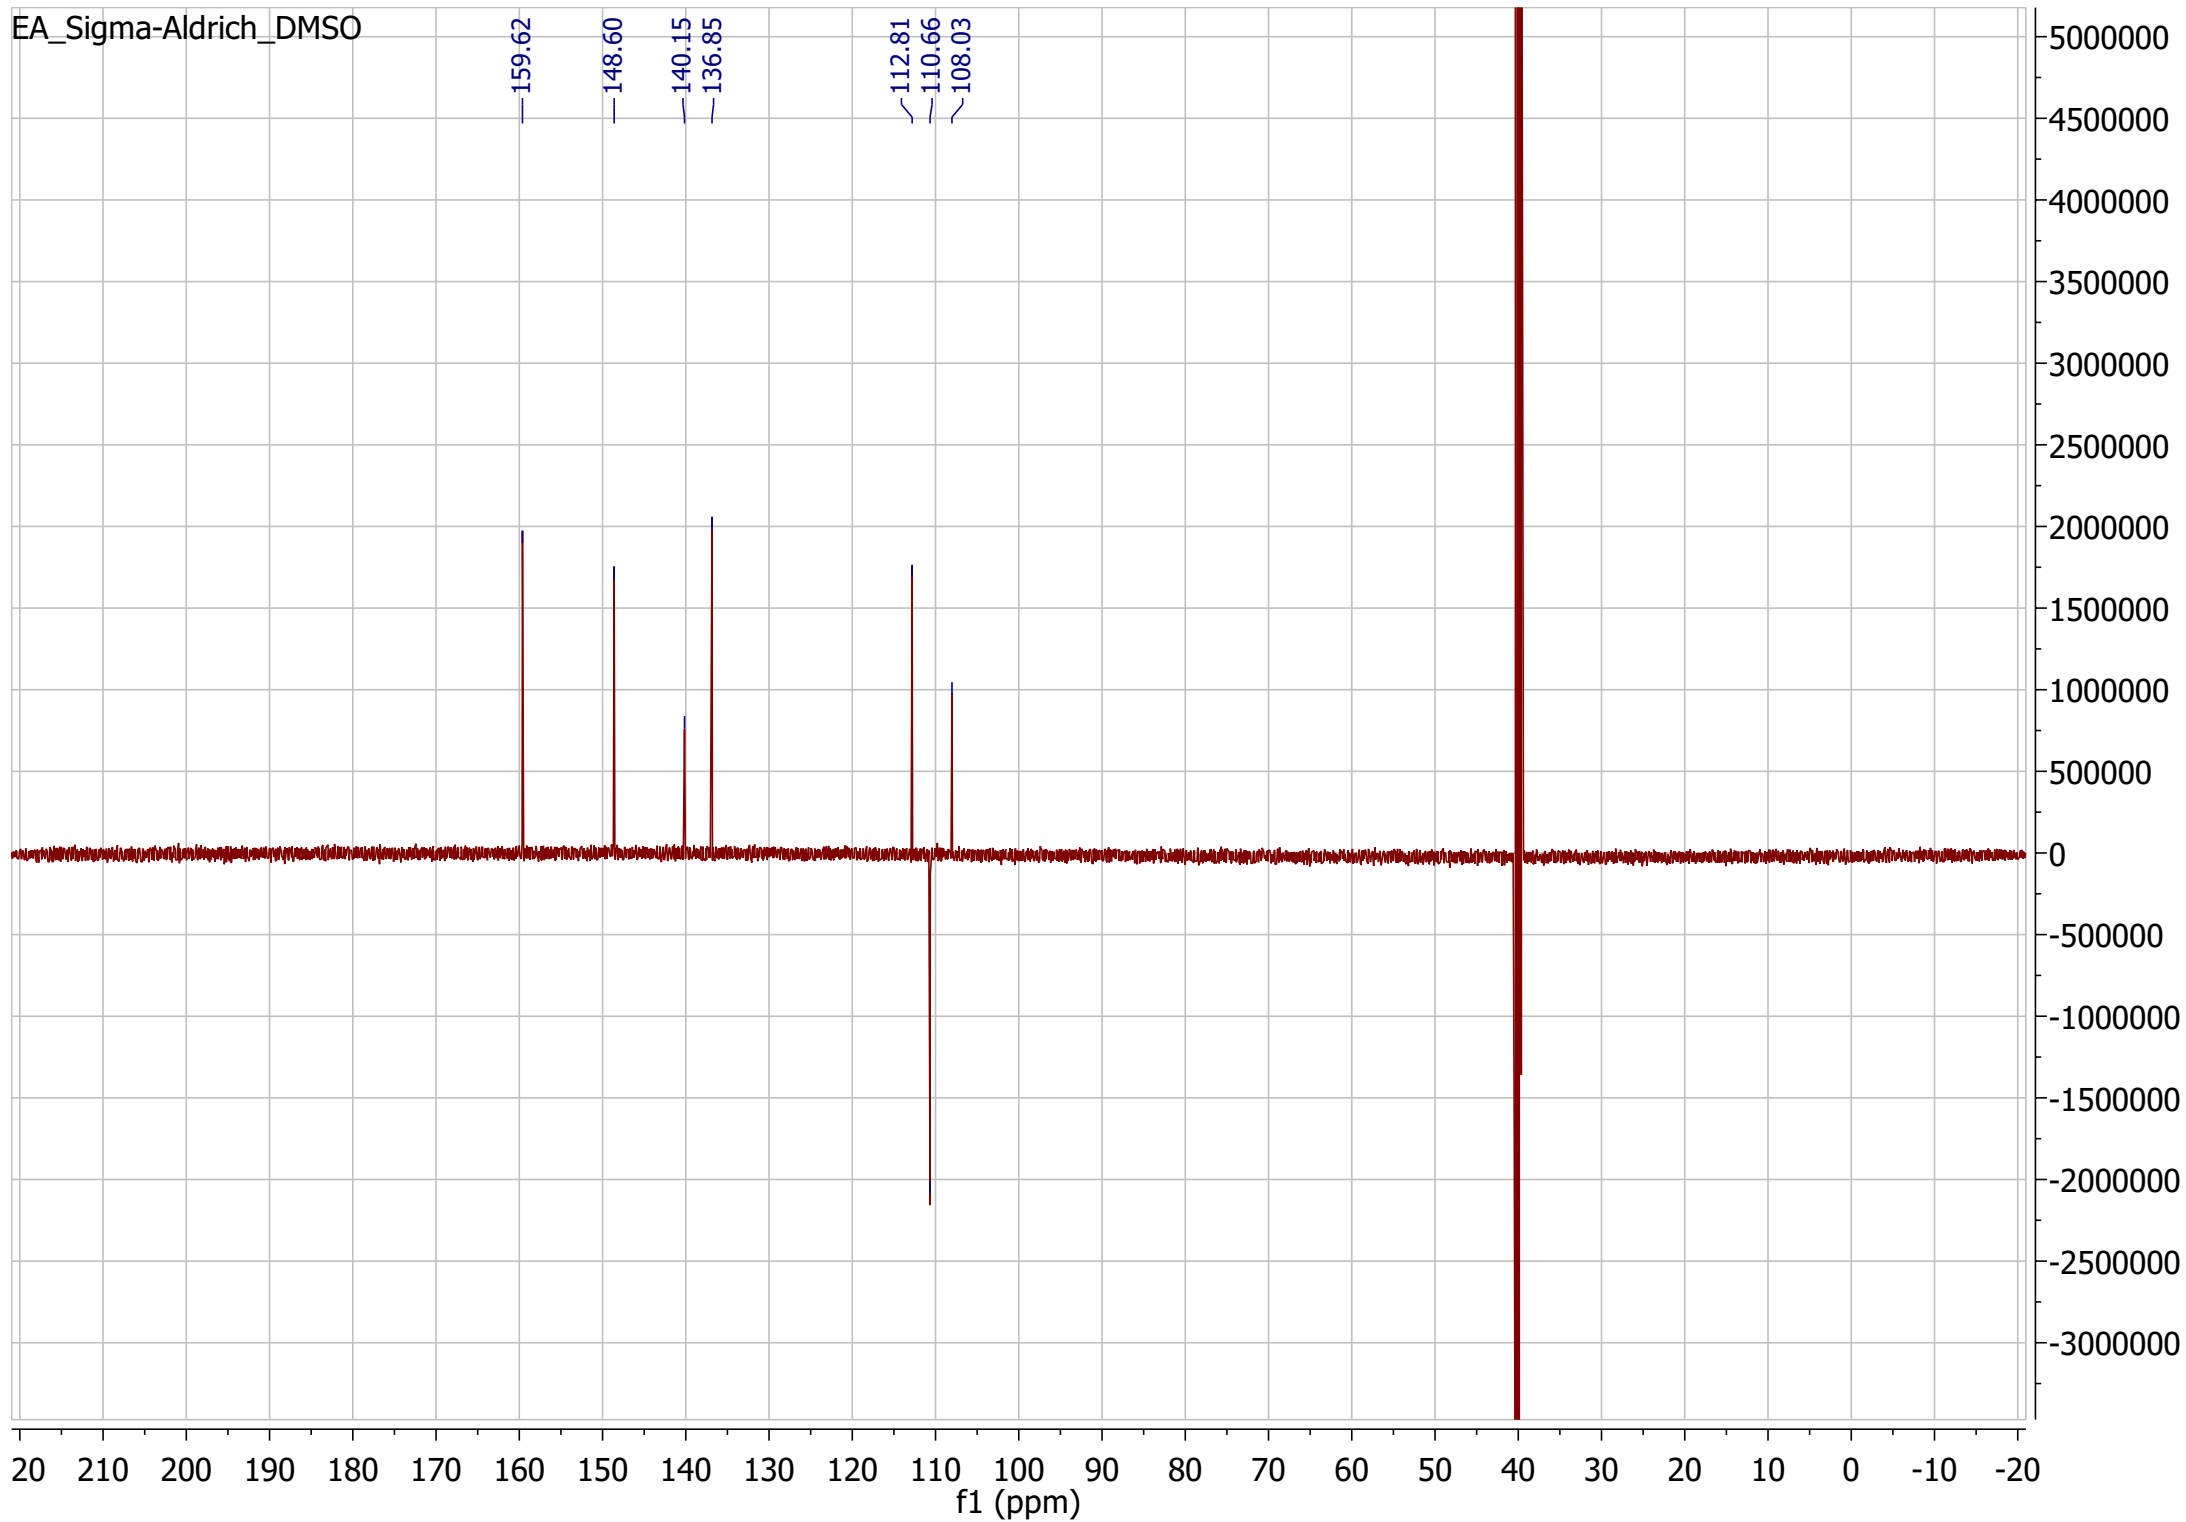

EA\_Fluorochem\_DMSO

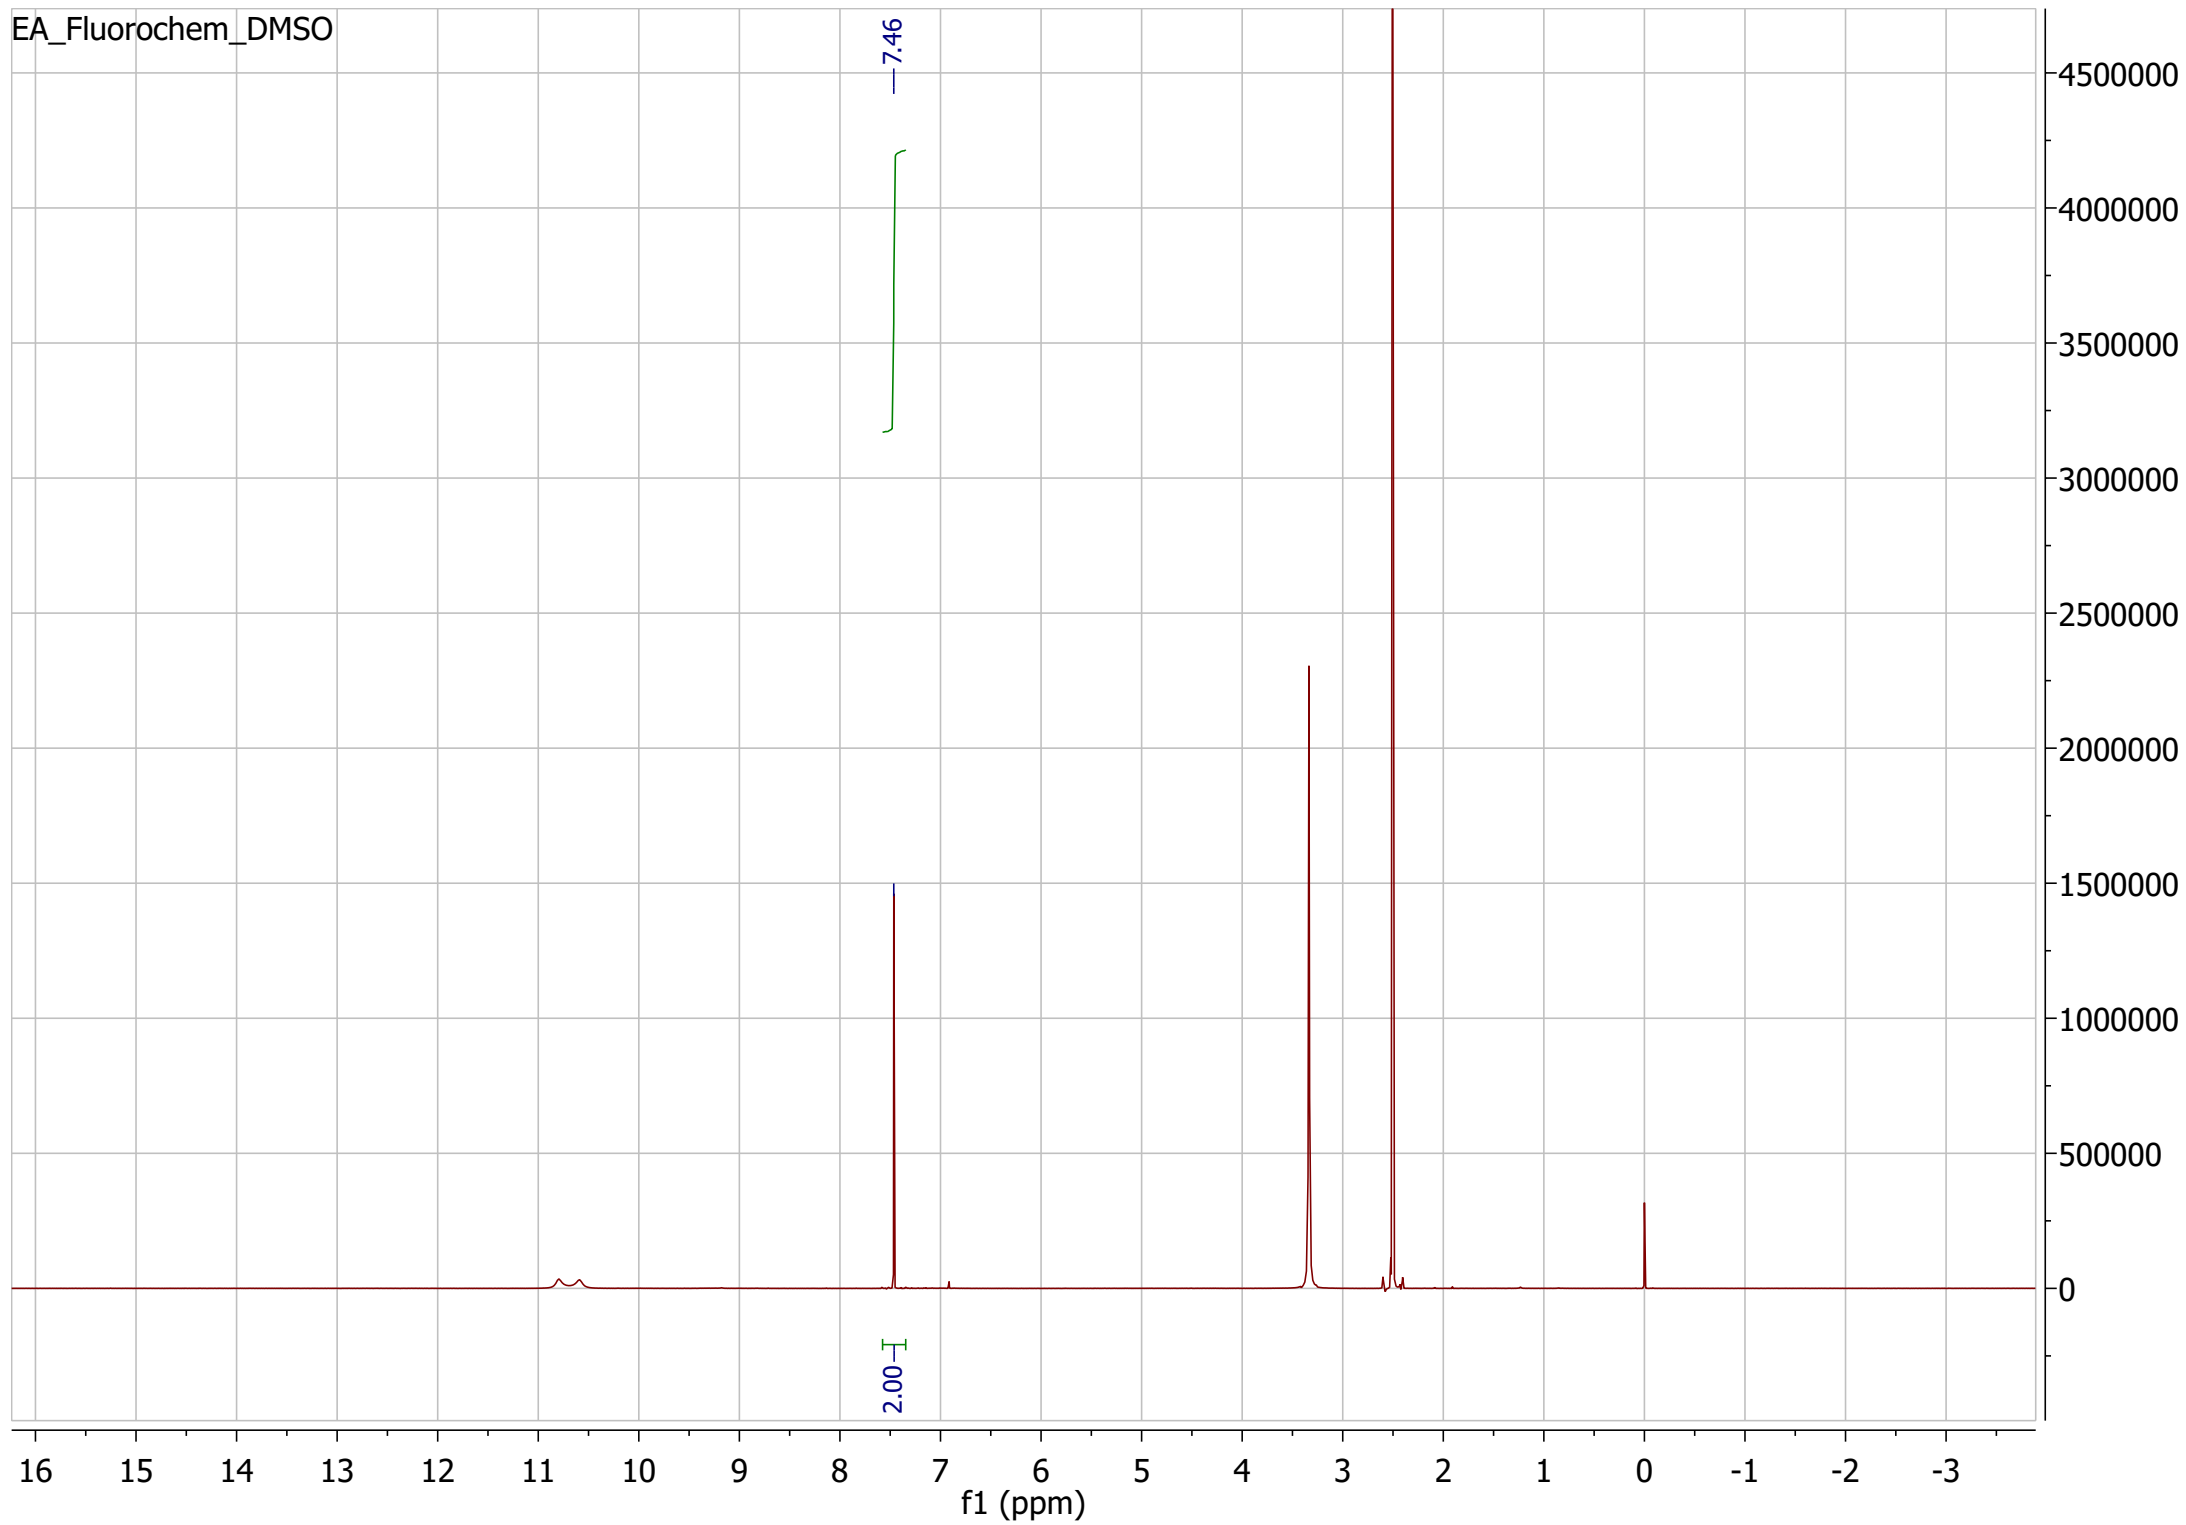

EA\_Fluorochem\_DMSO

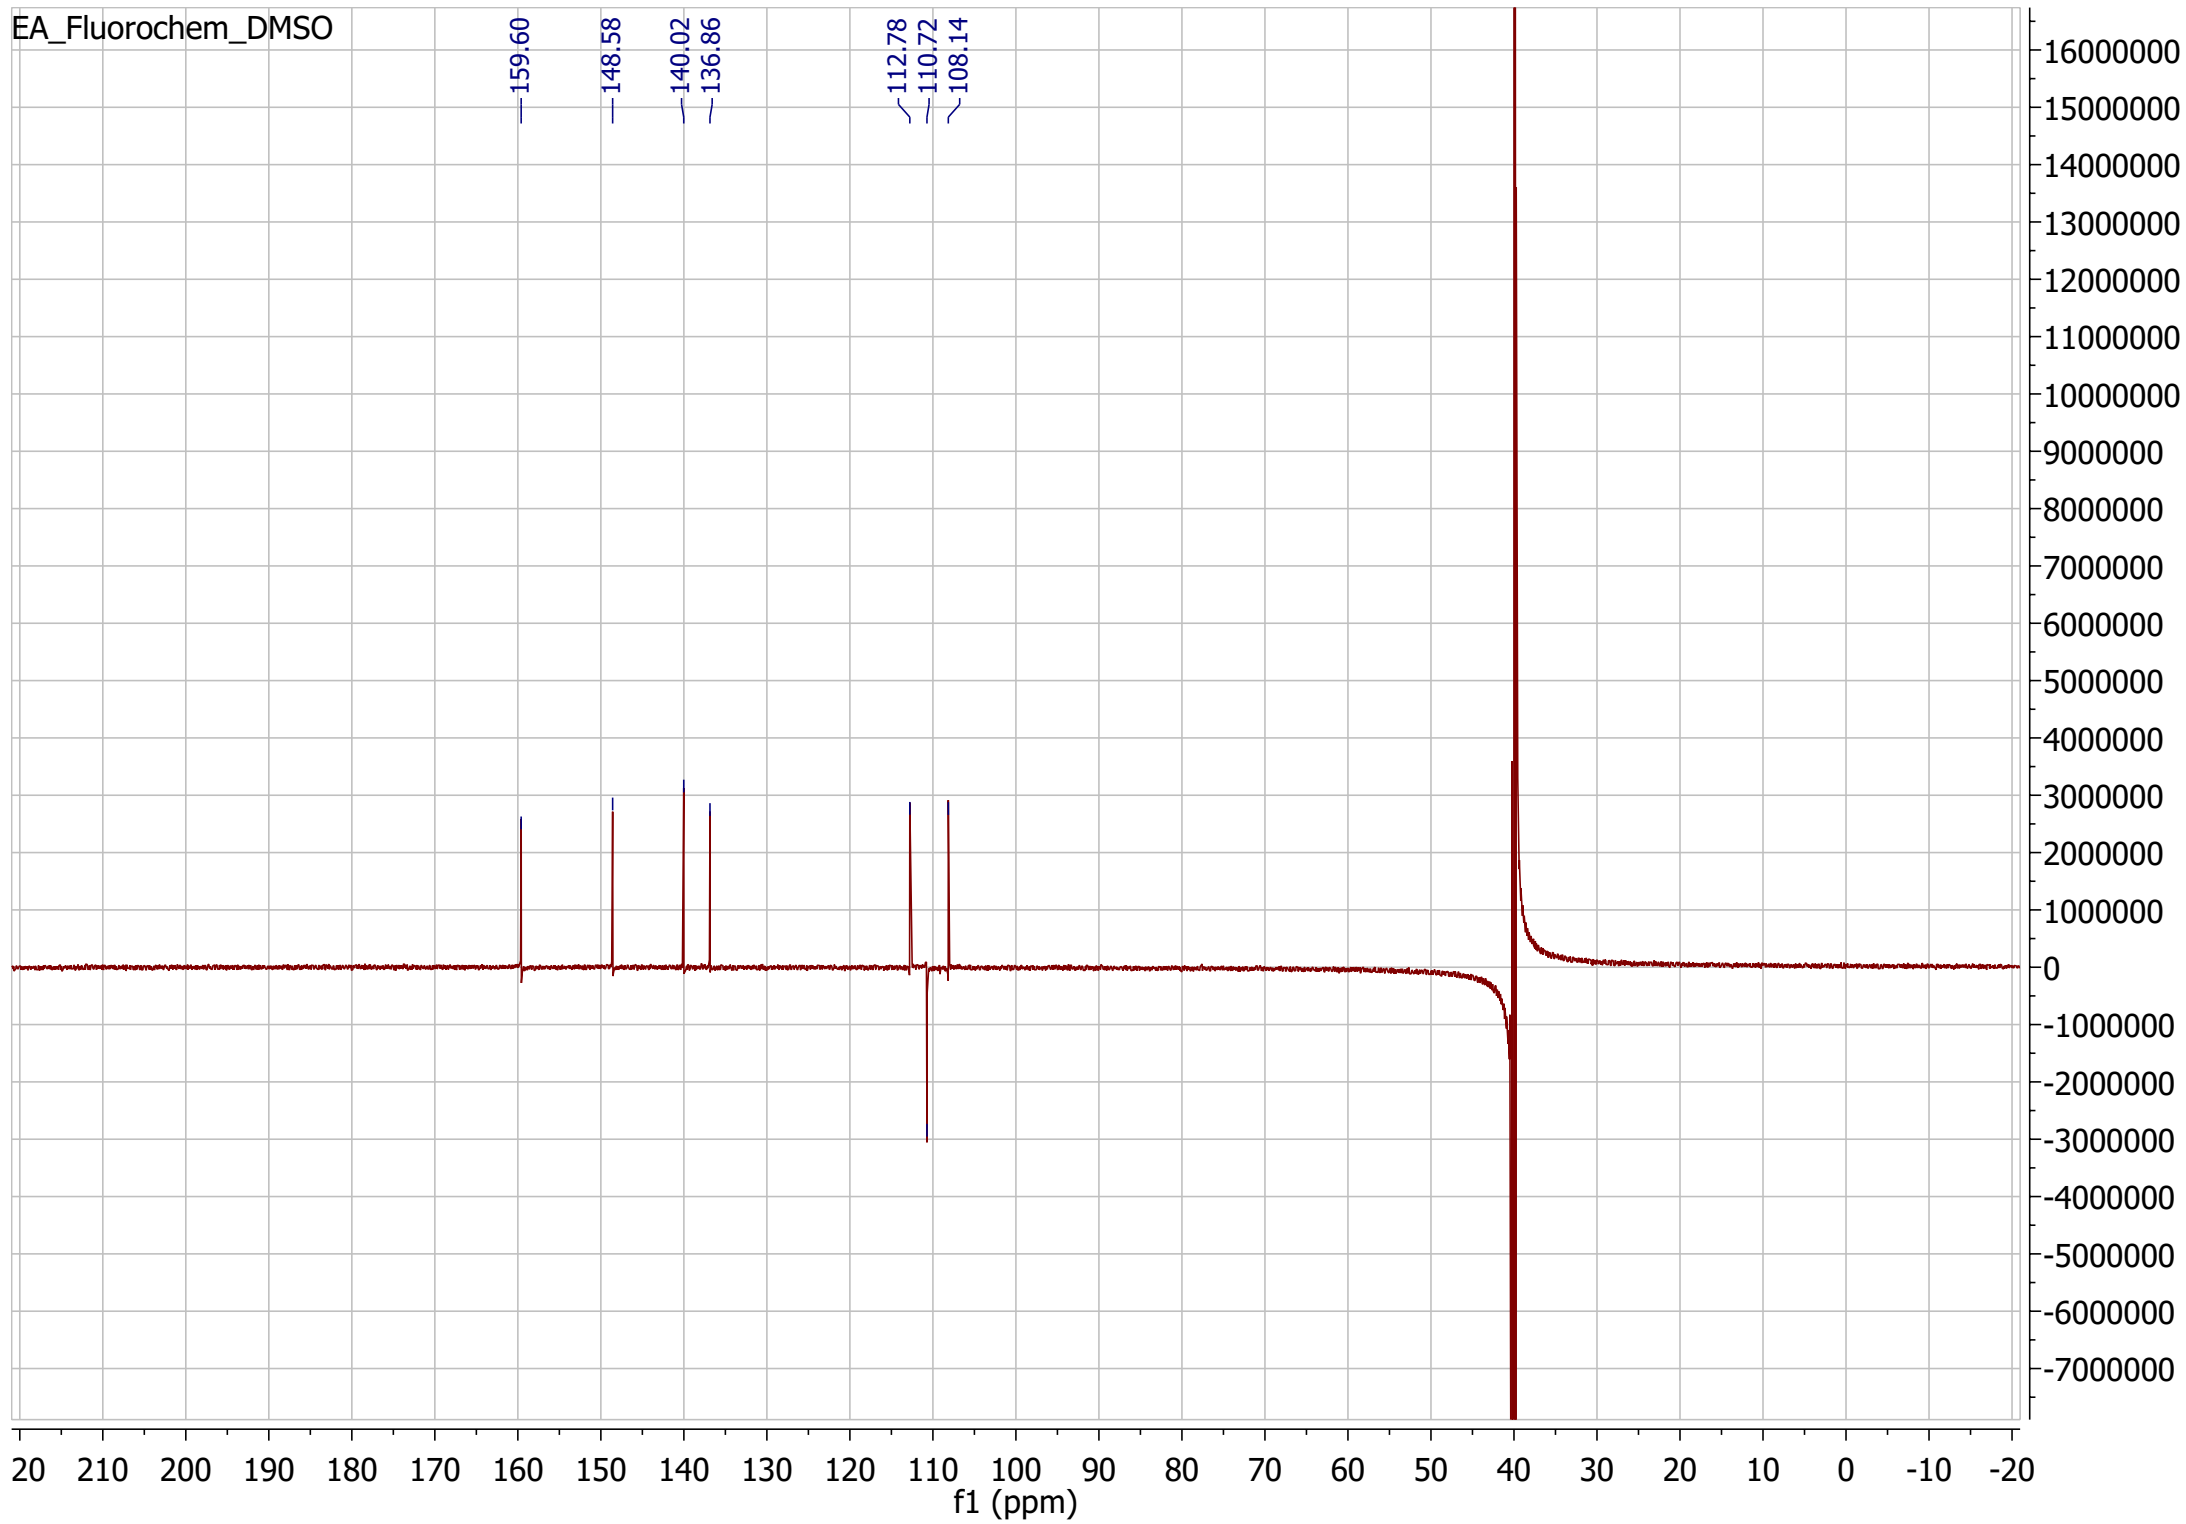

Gallic acid\_DMSO

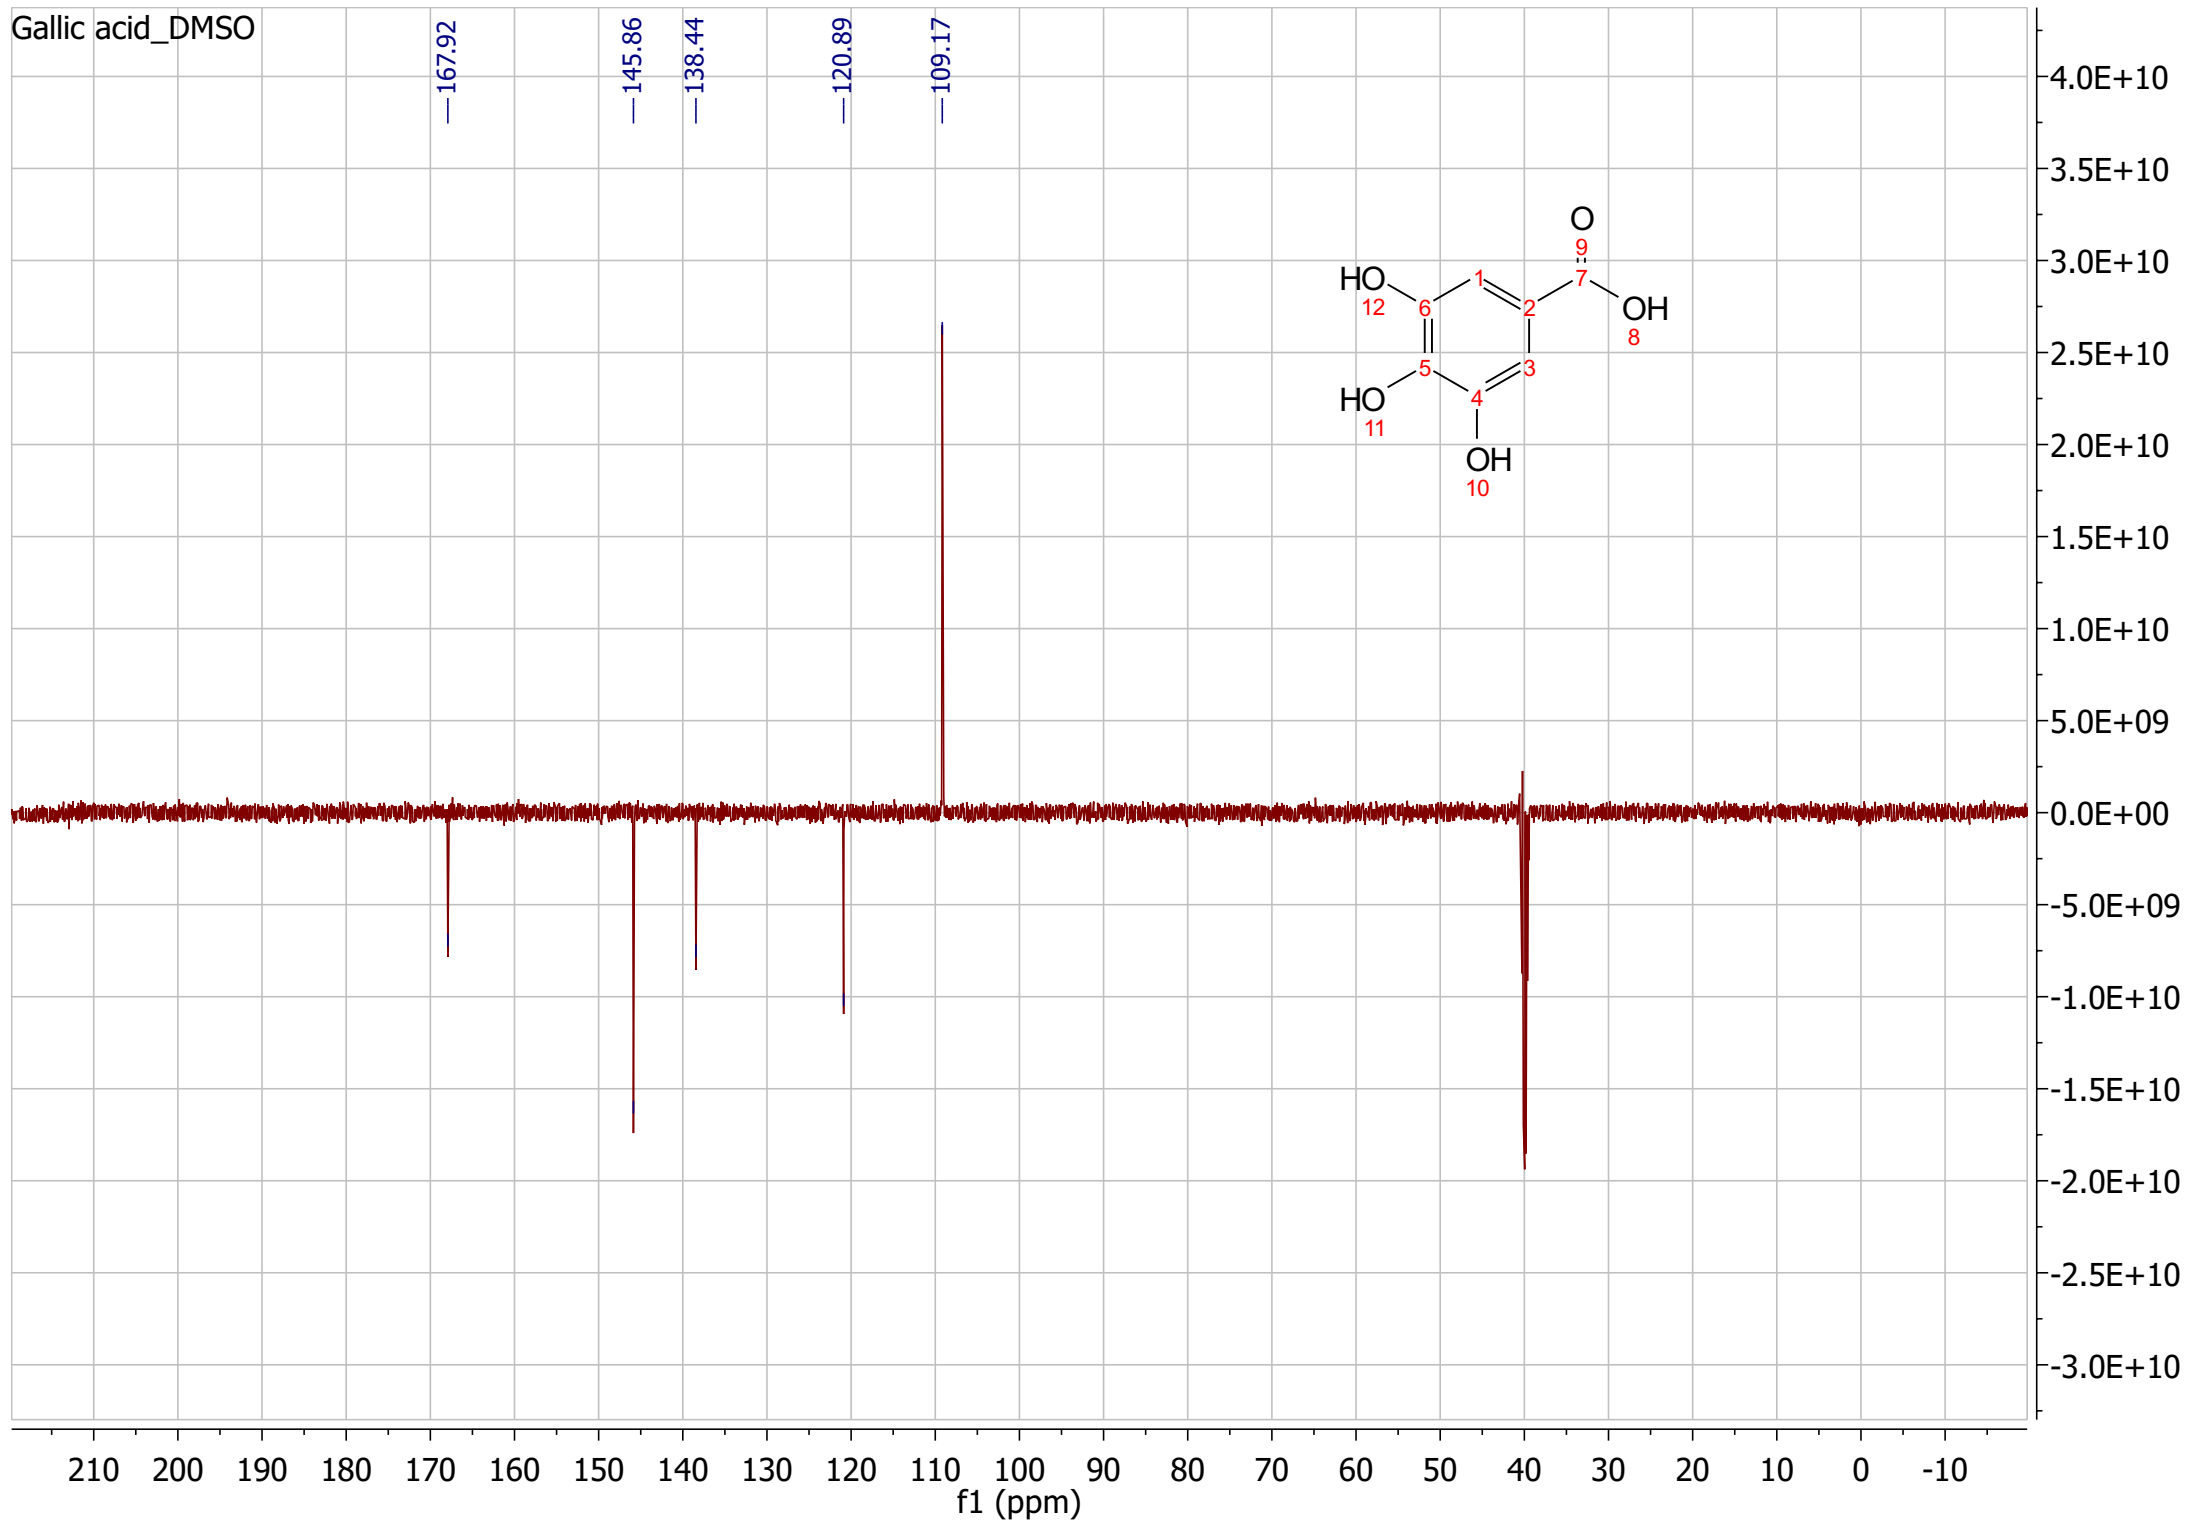

Gallic acid\_DMSO

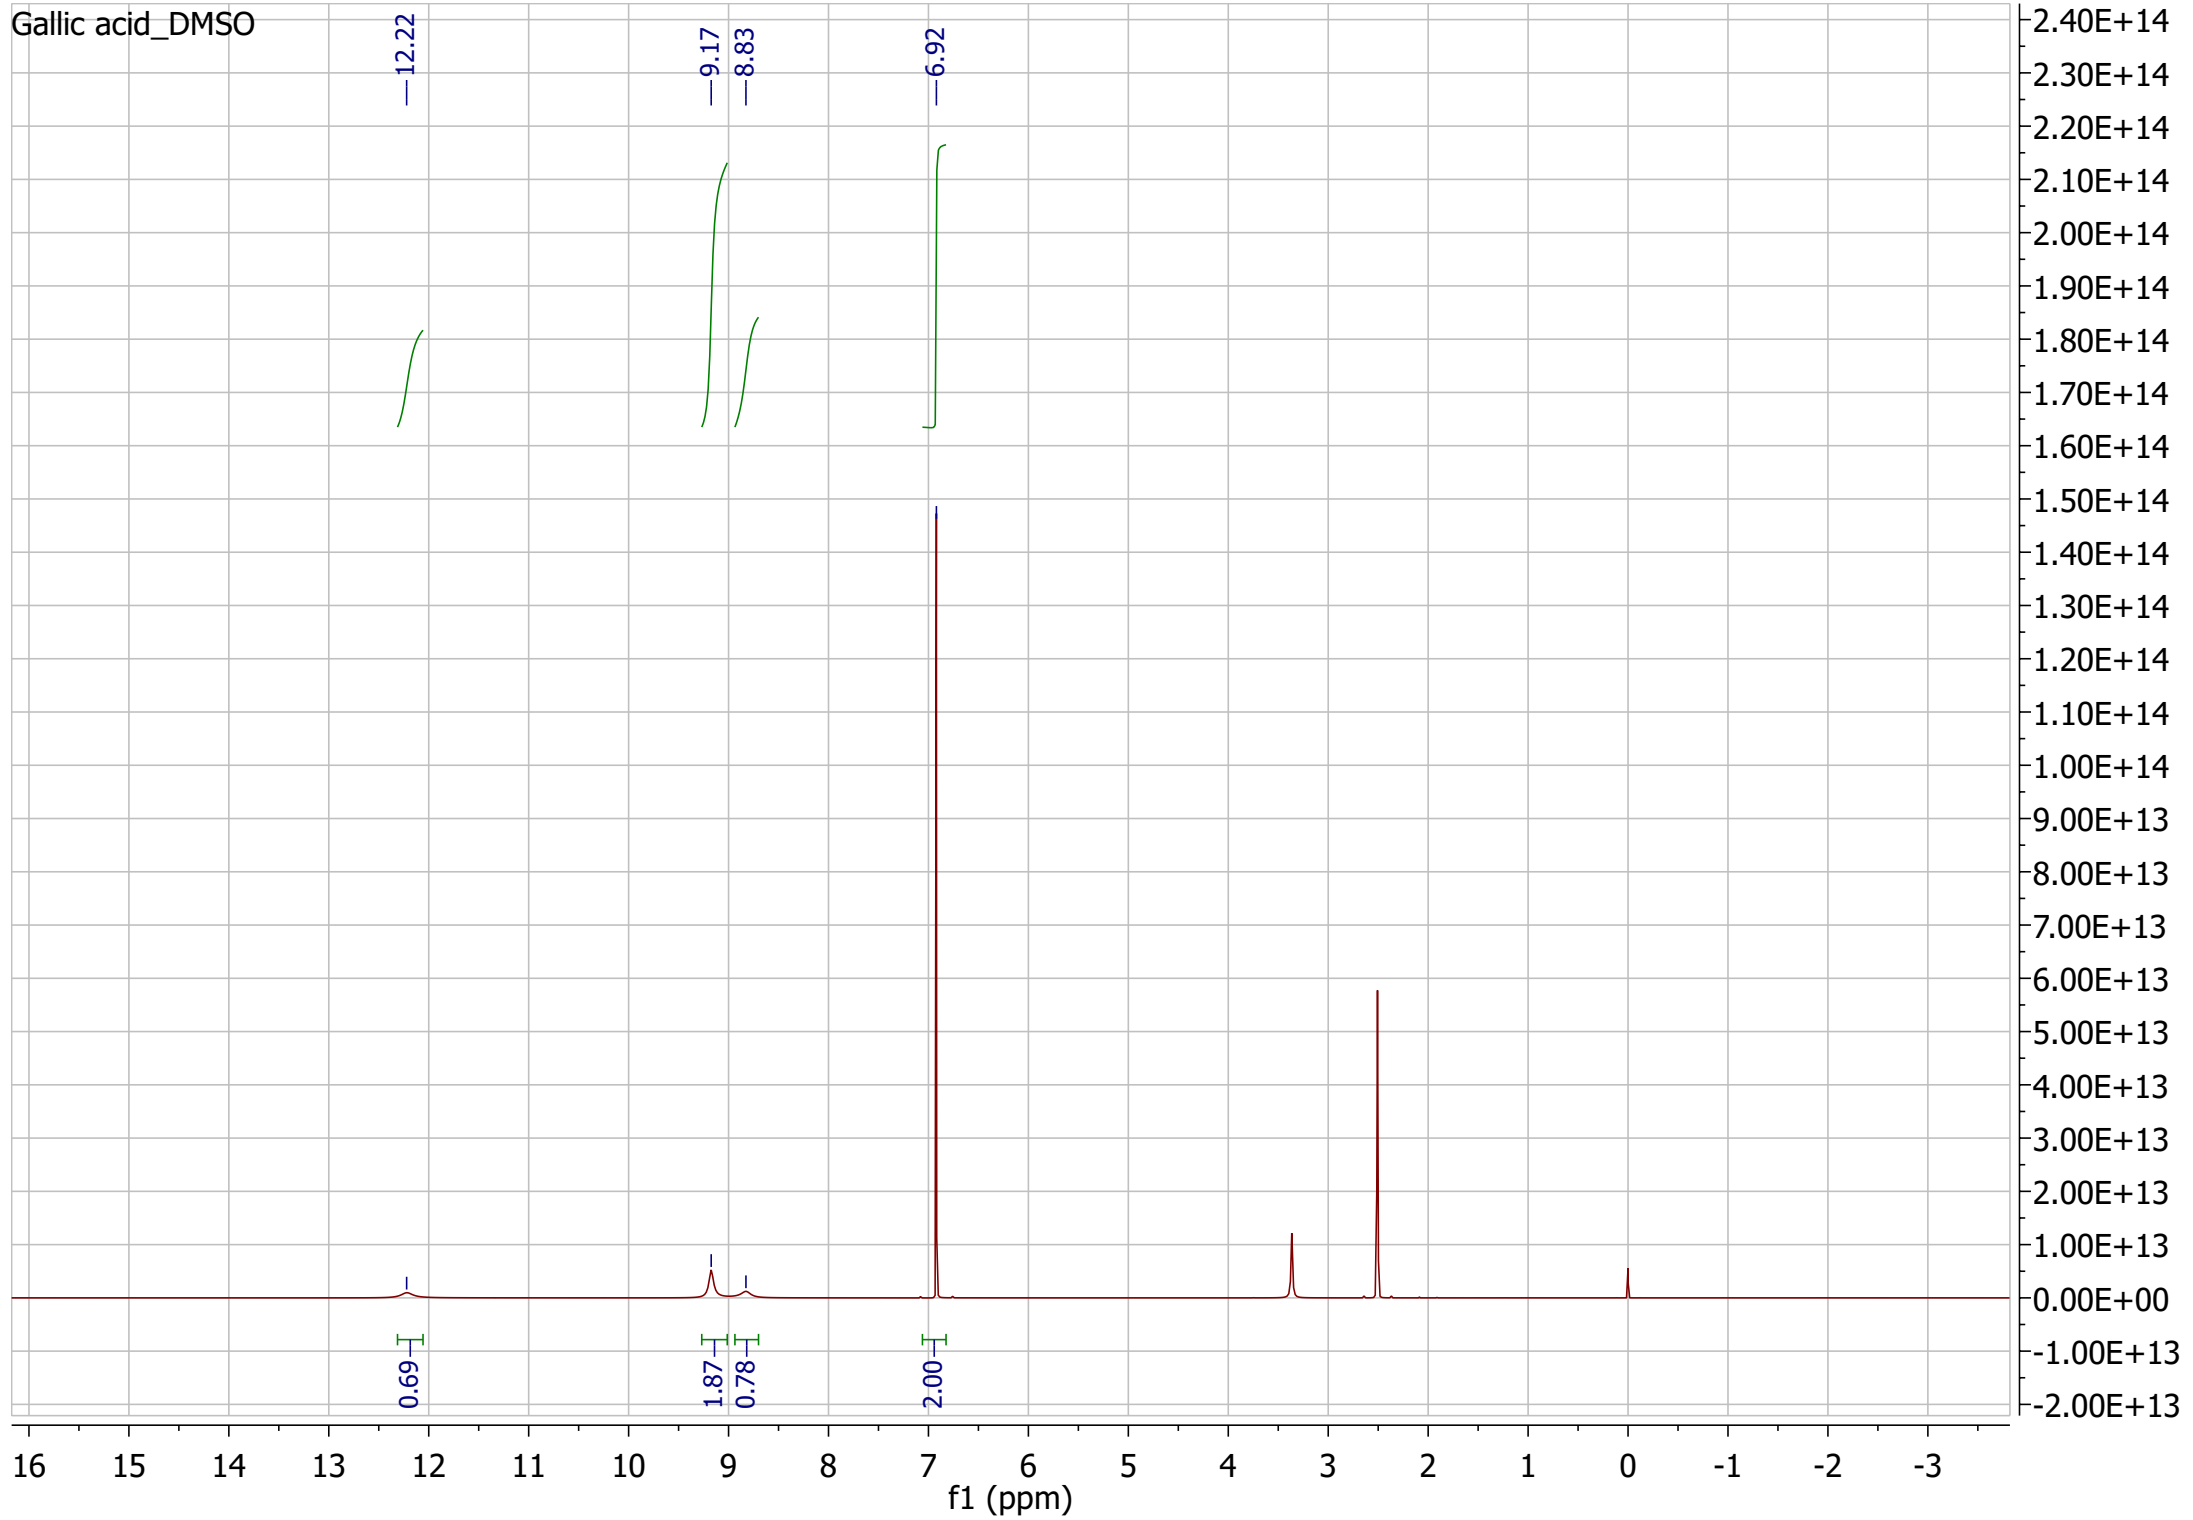



Methylgallate (17)\_DMSO

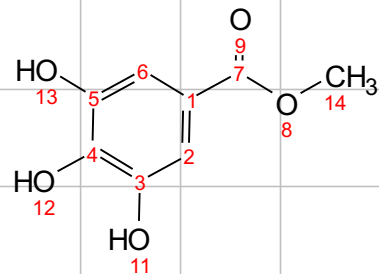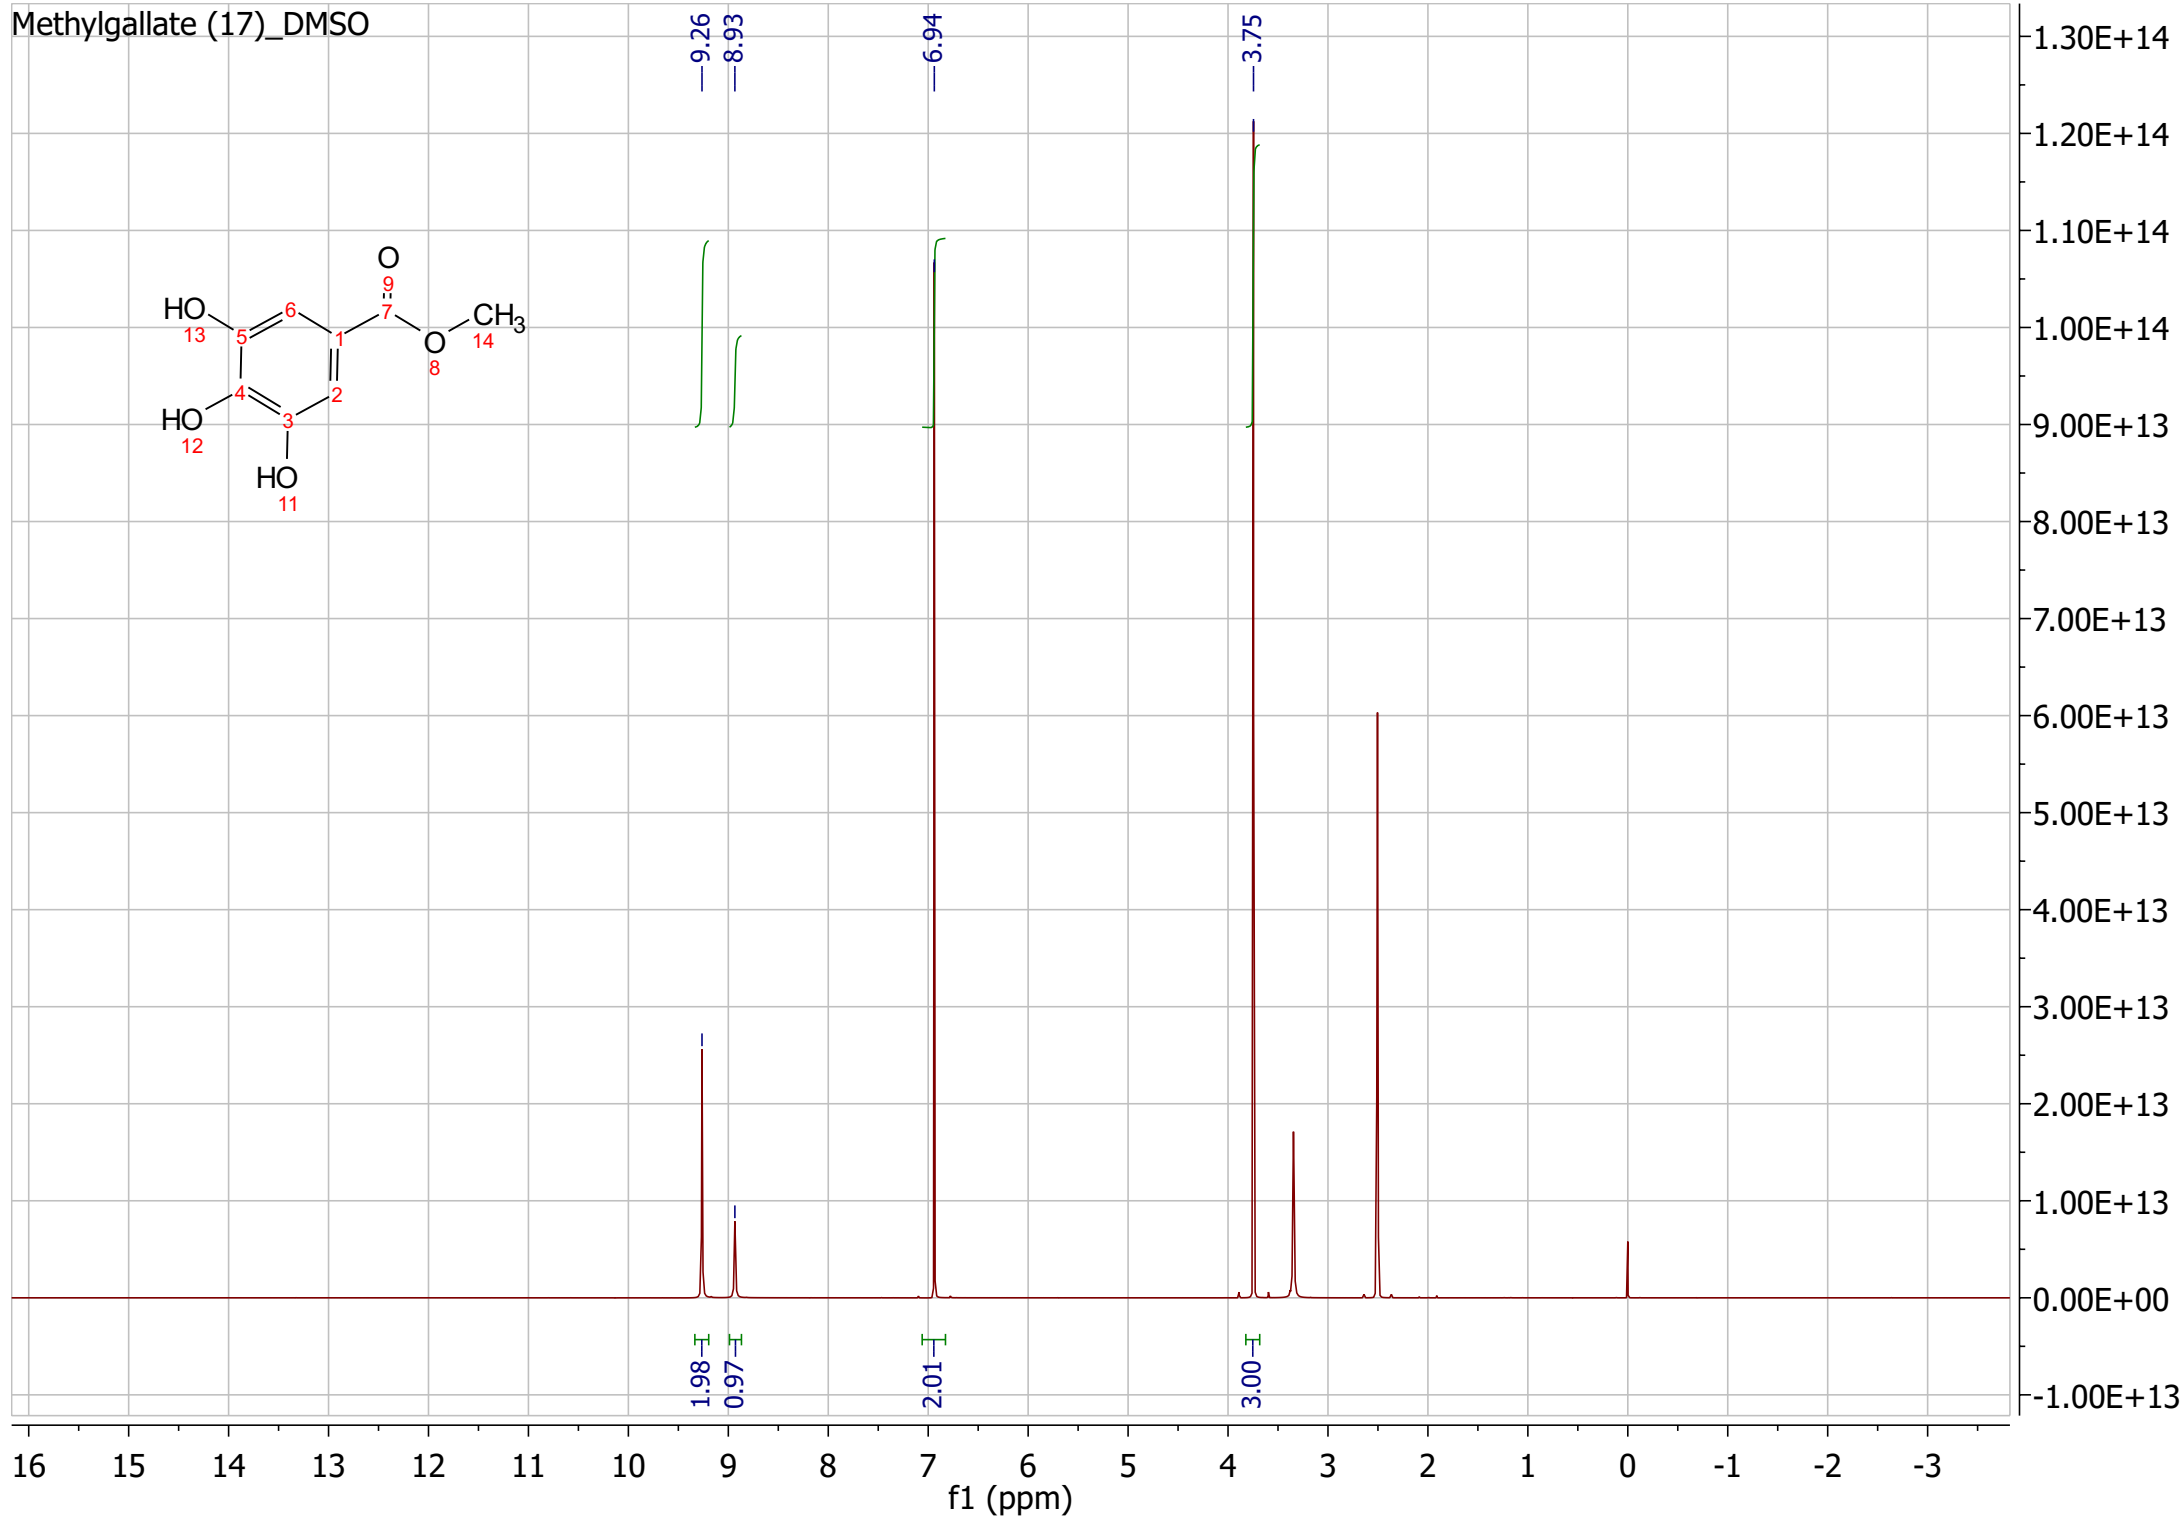

Methylgallate (17)\_DMSO

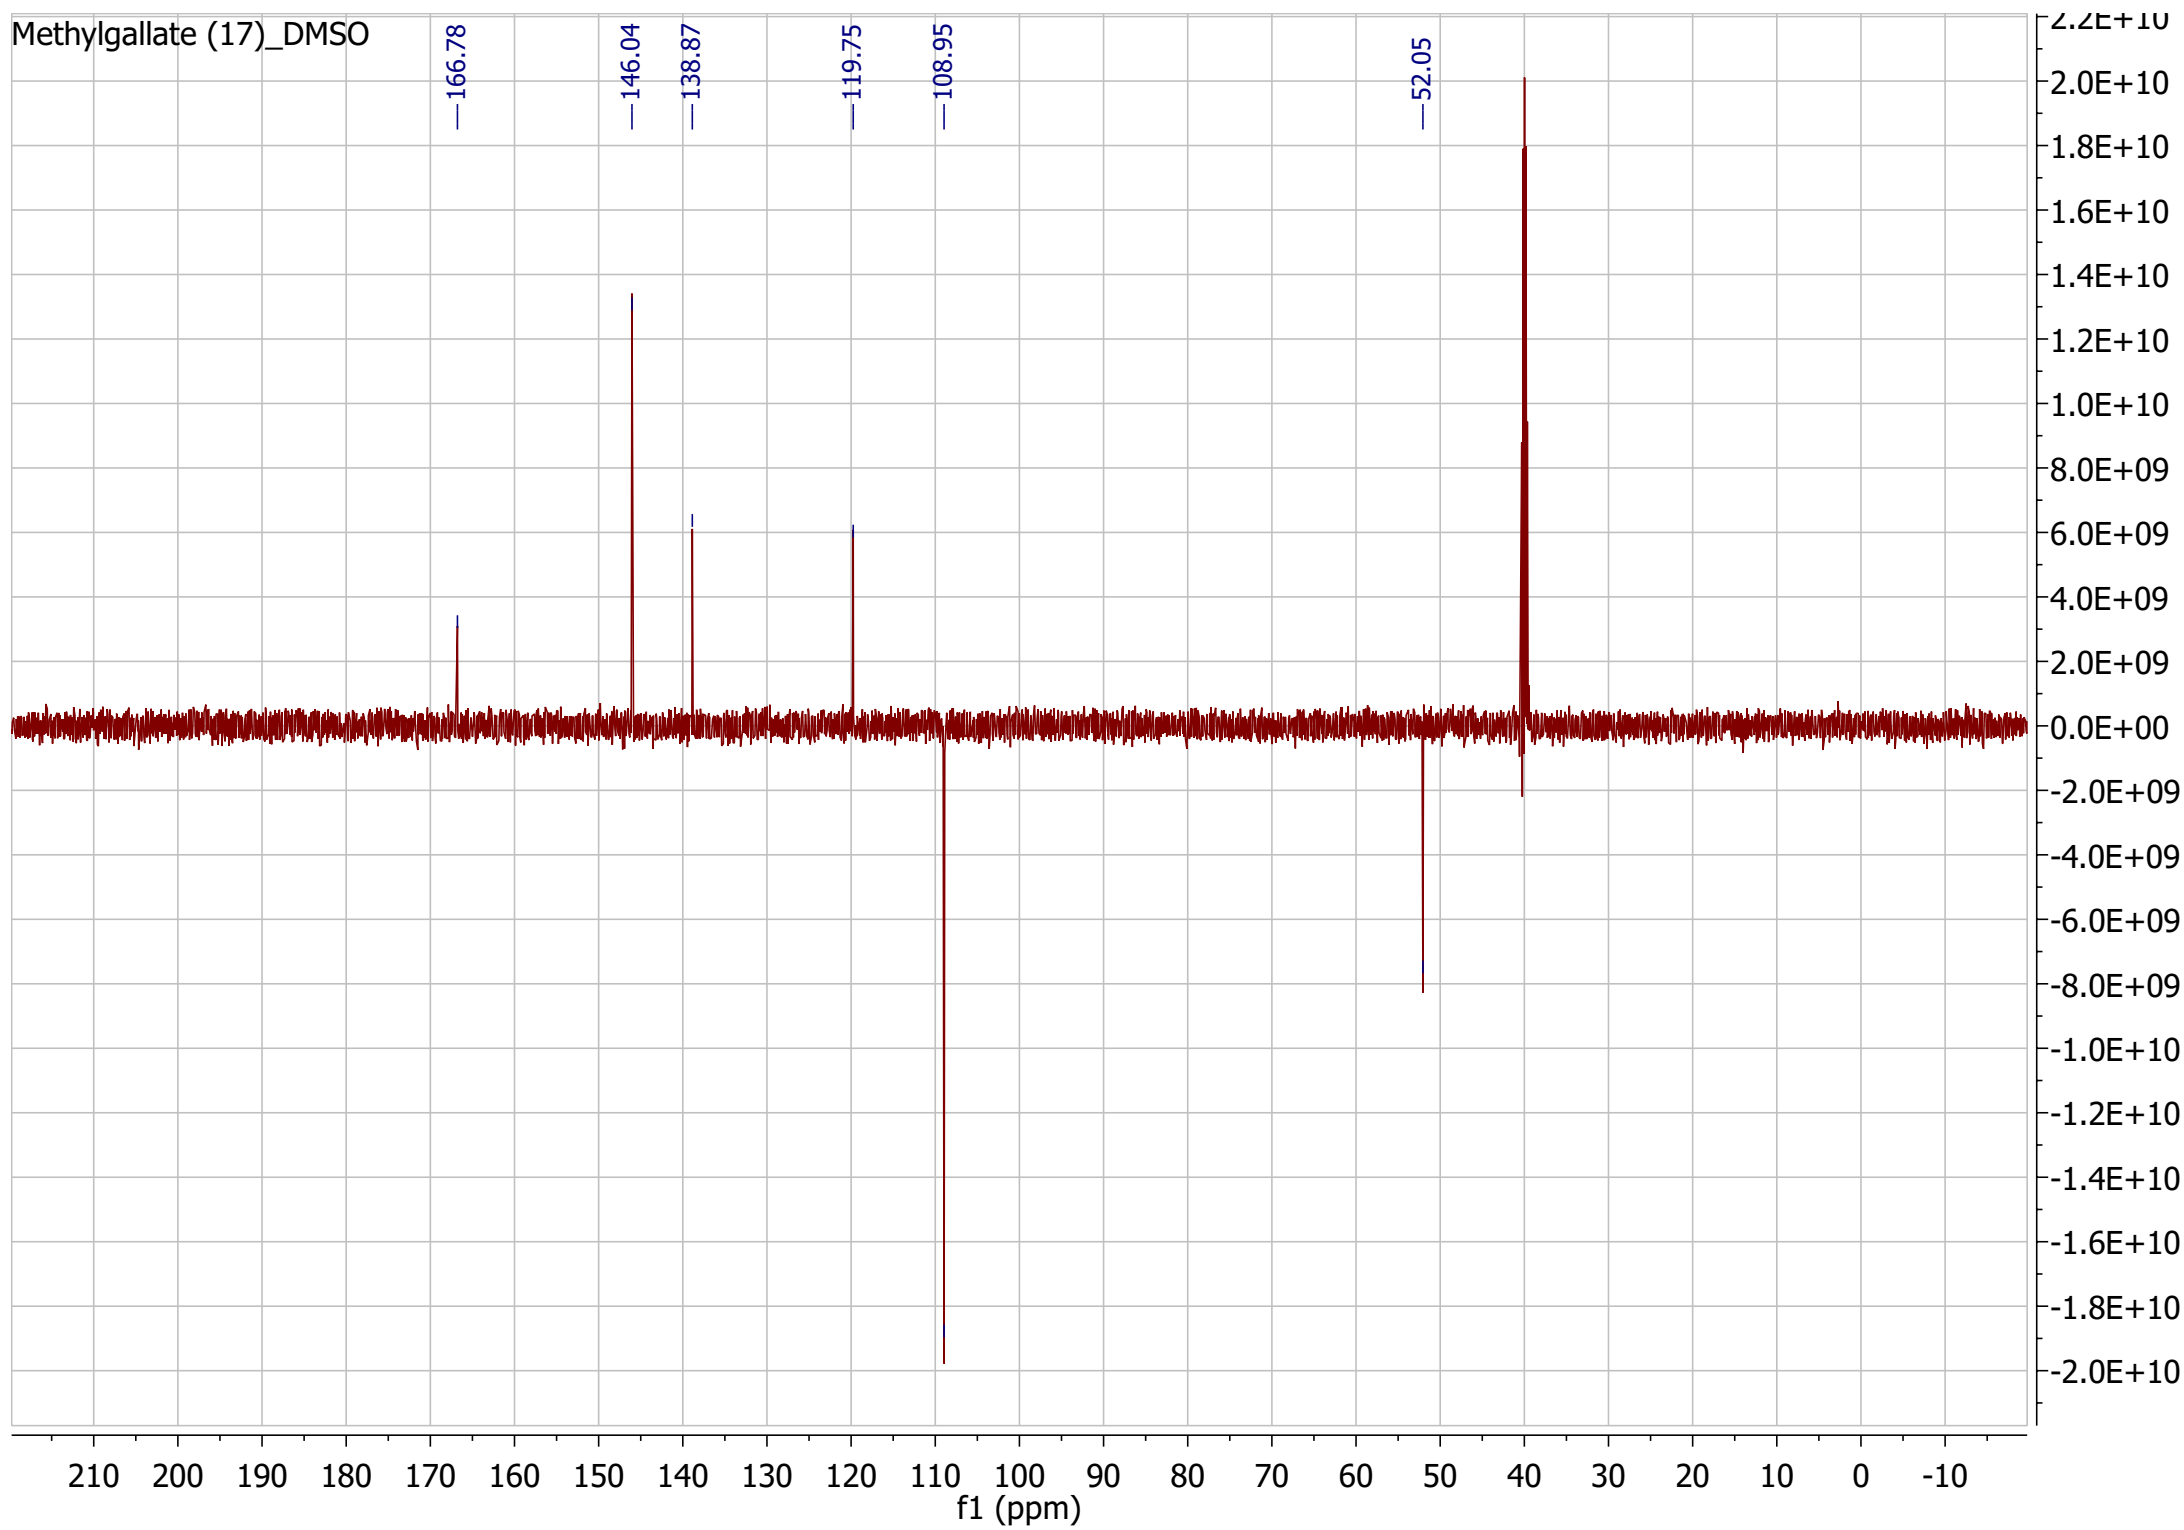

Methyl 3,4-dihydroxybenzoate (21) DMSO

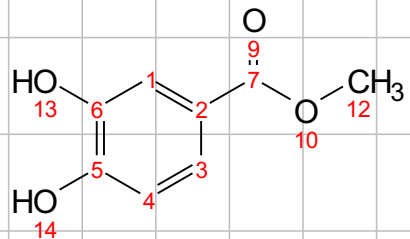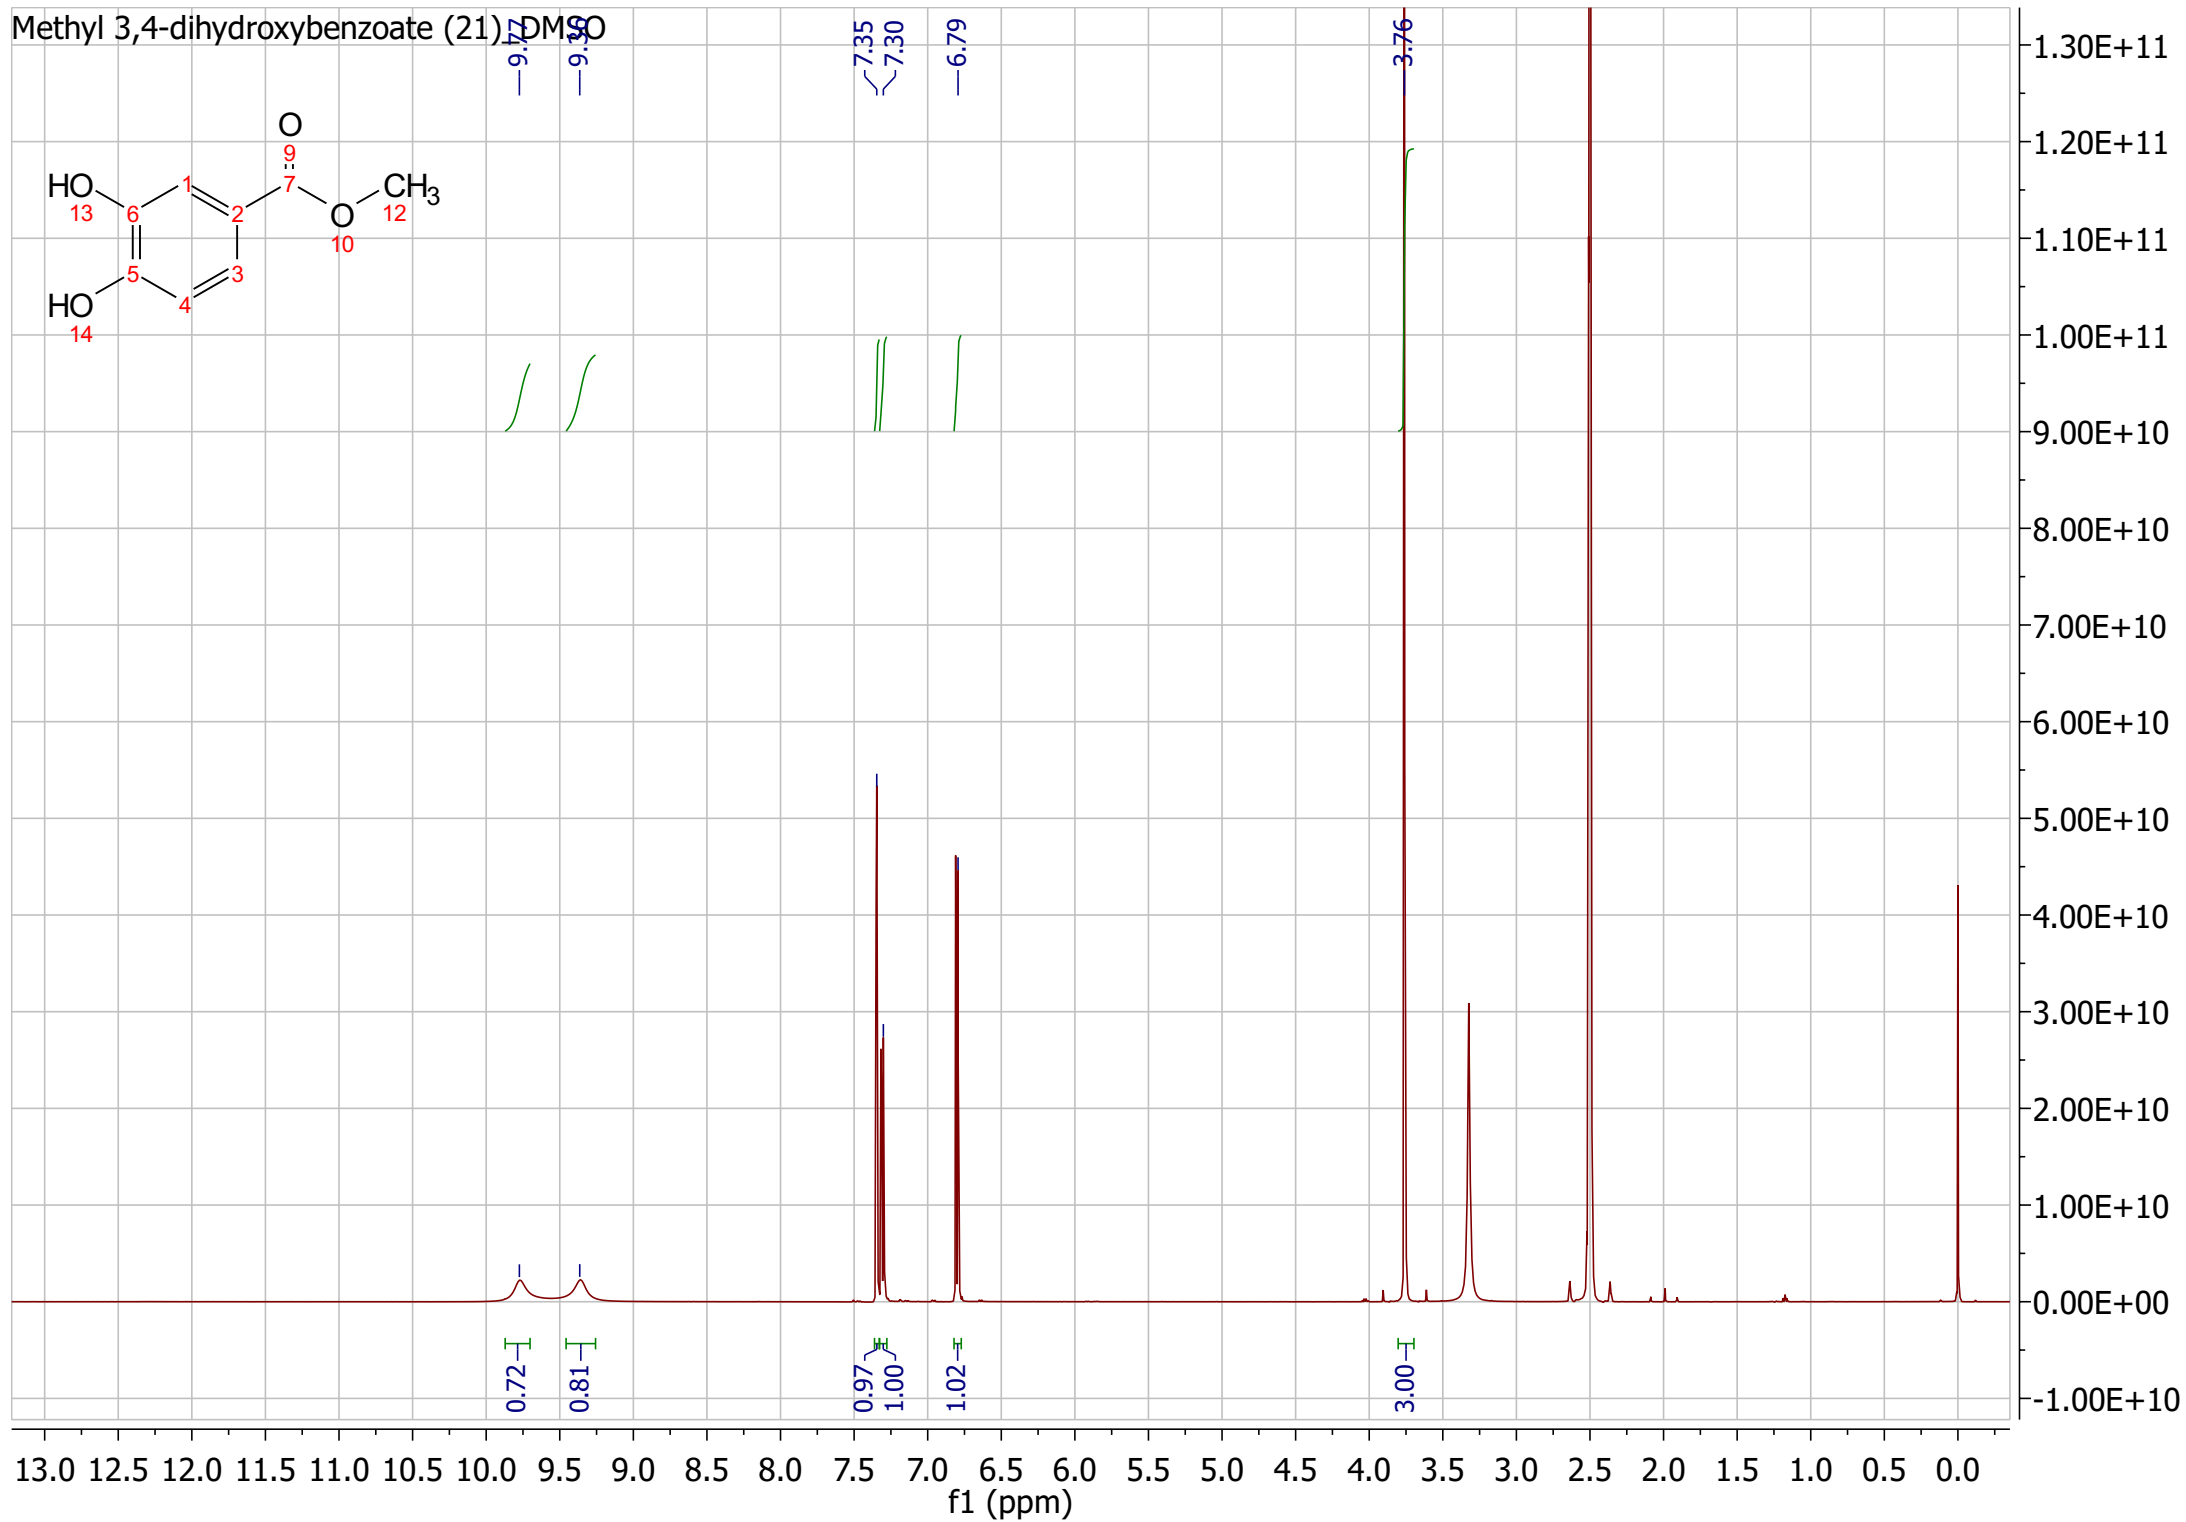

Methyl 3,4-dihydroxybenzoate (21)\_DMSO

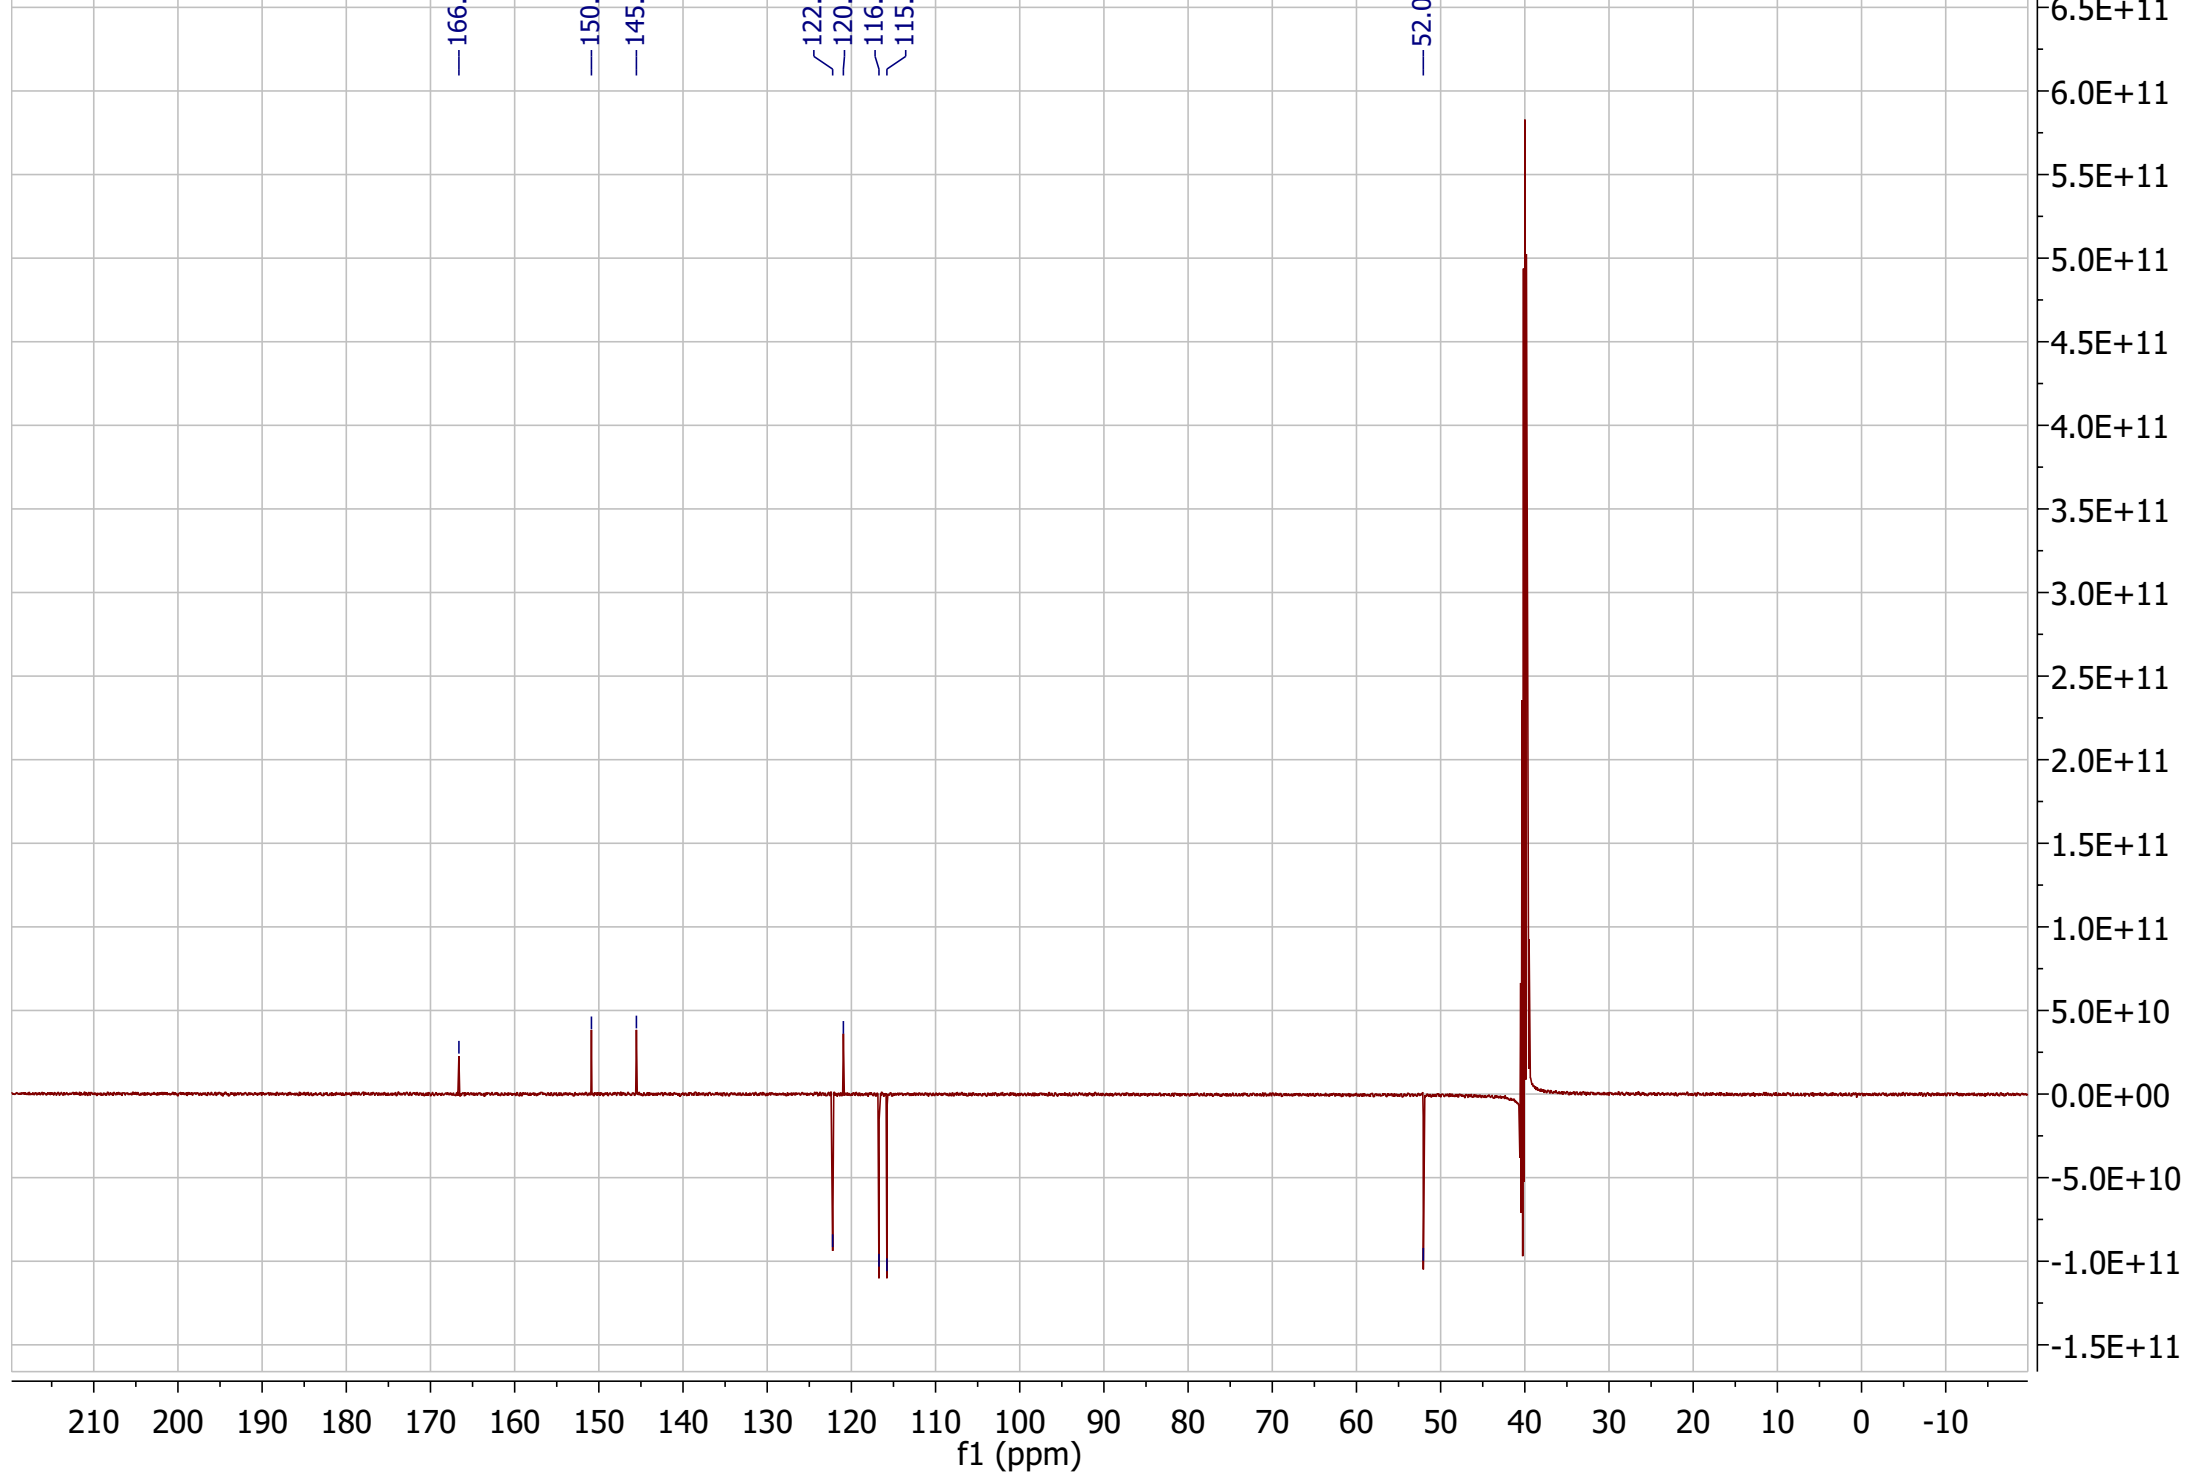

Methyl 3,5-dihydroxybenzoate (22)\_DMSO

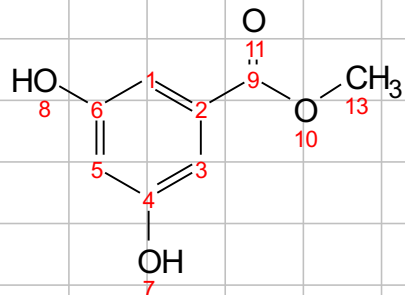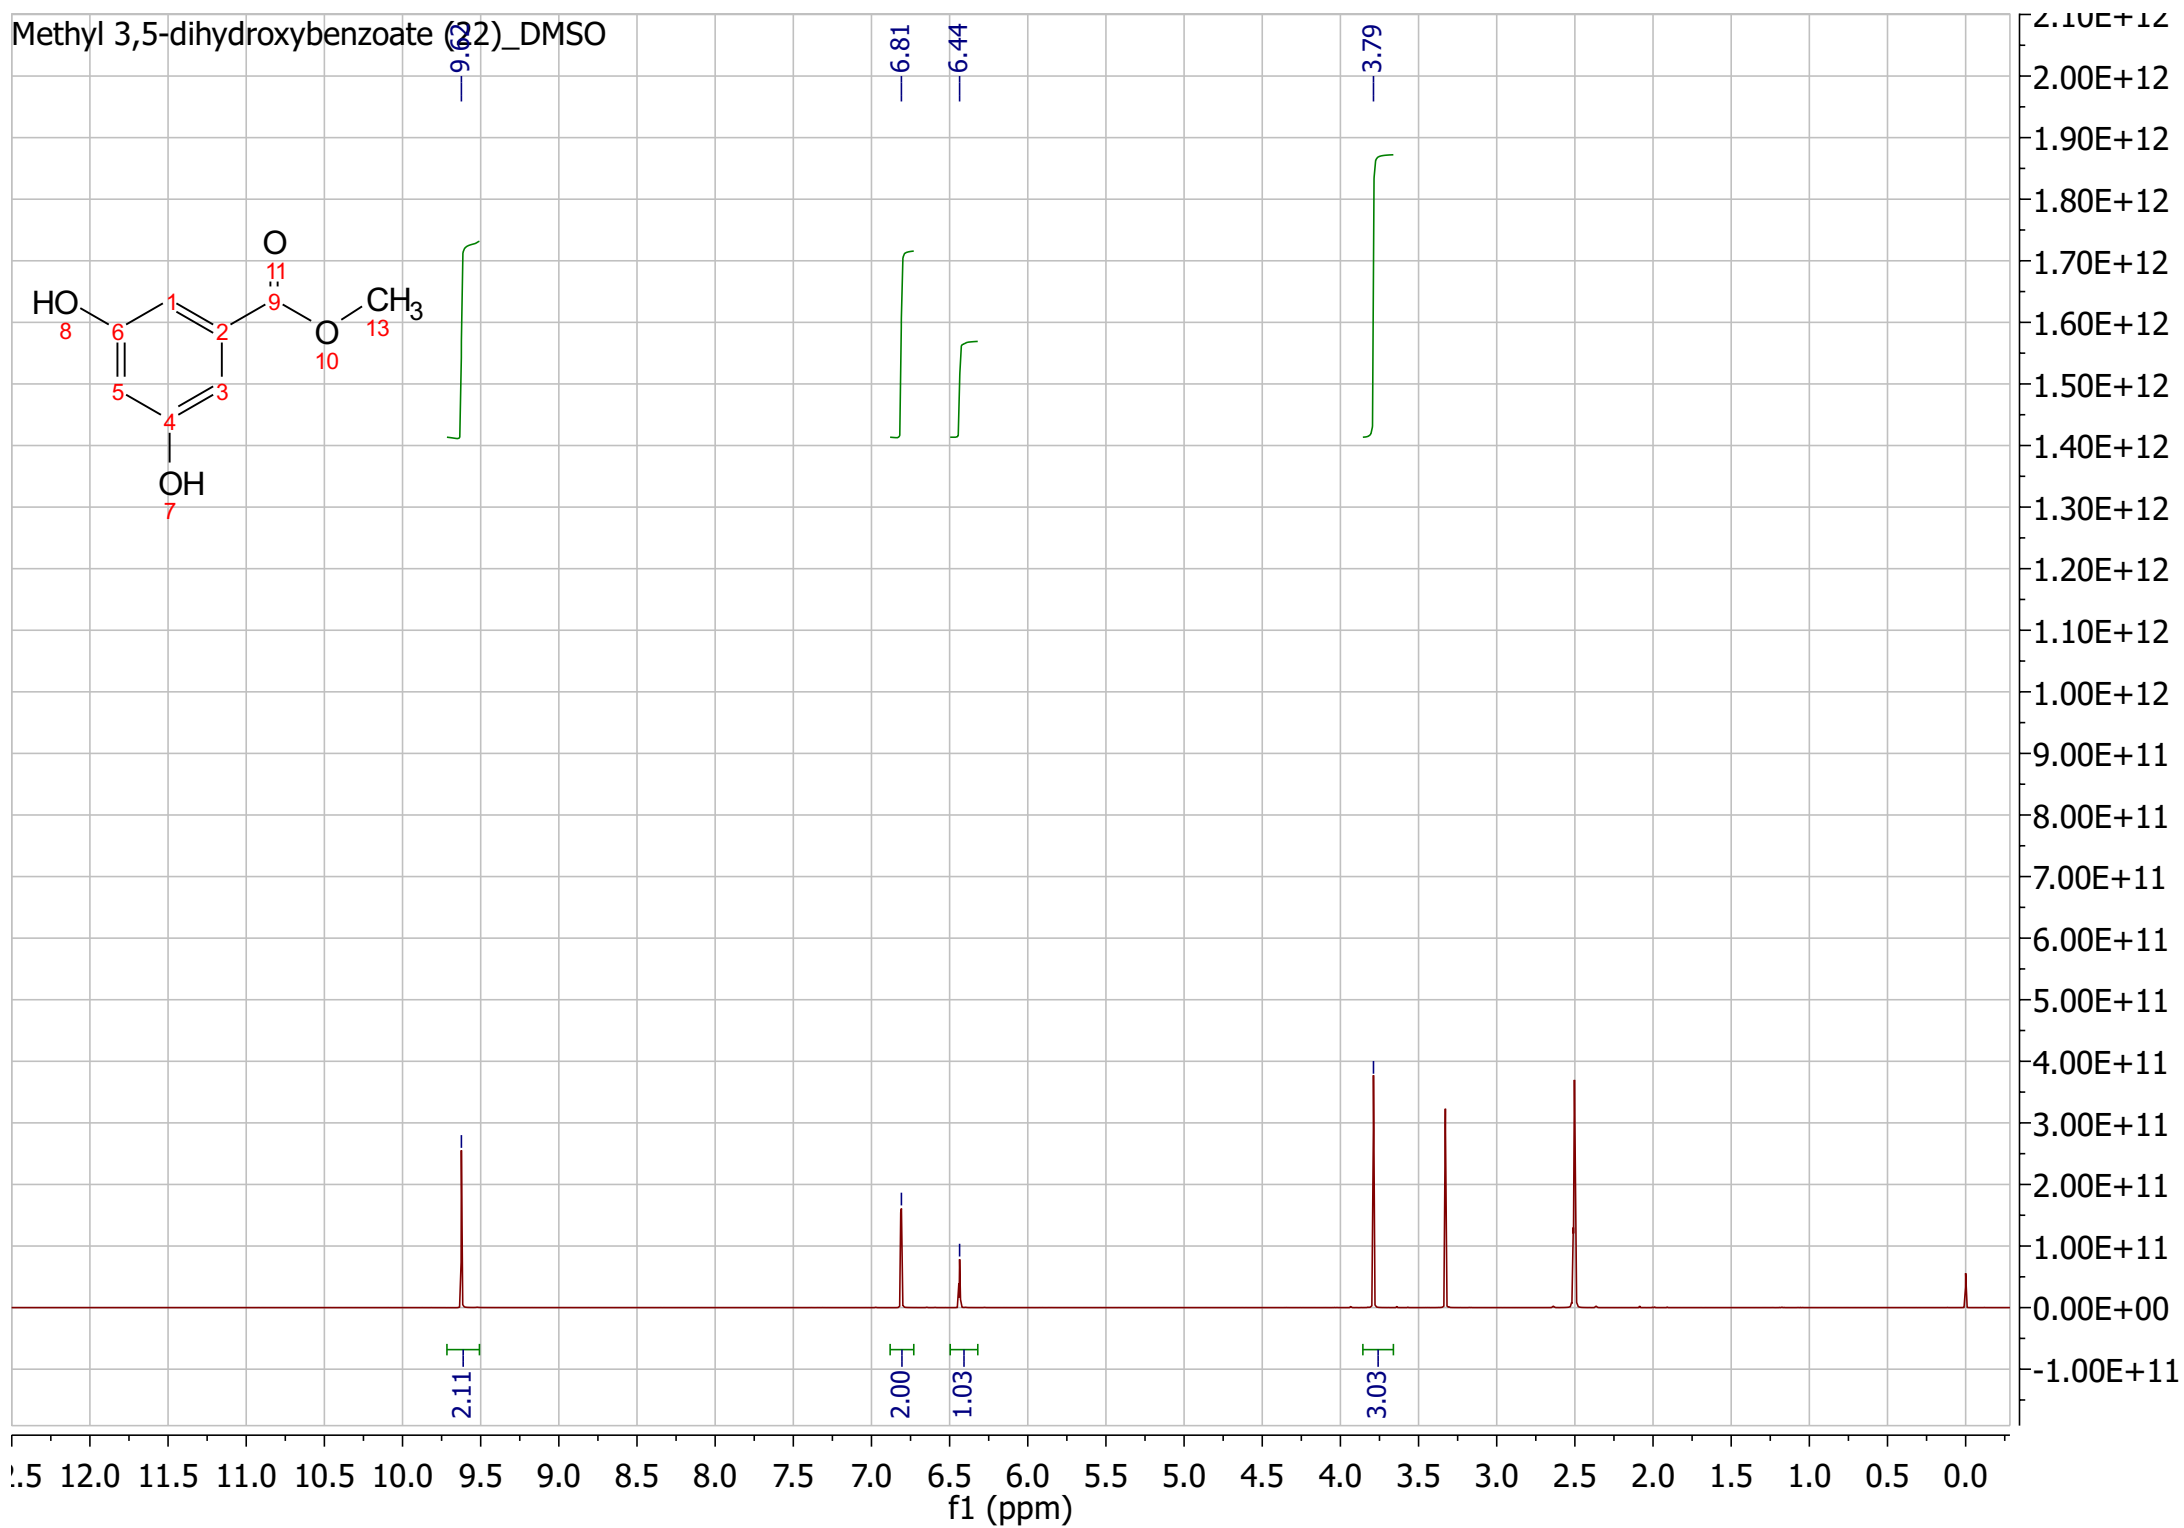

Methyl 3,5-dihydroxybenzoate (22) DMSO

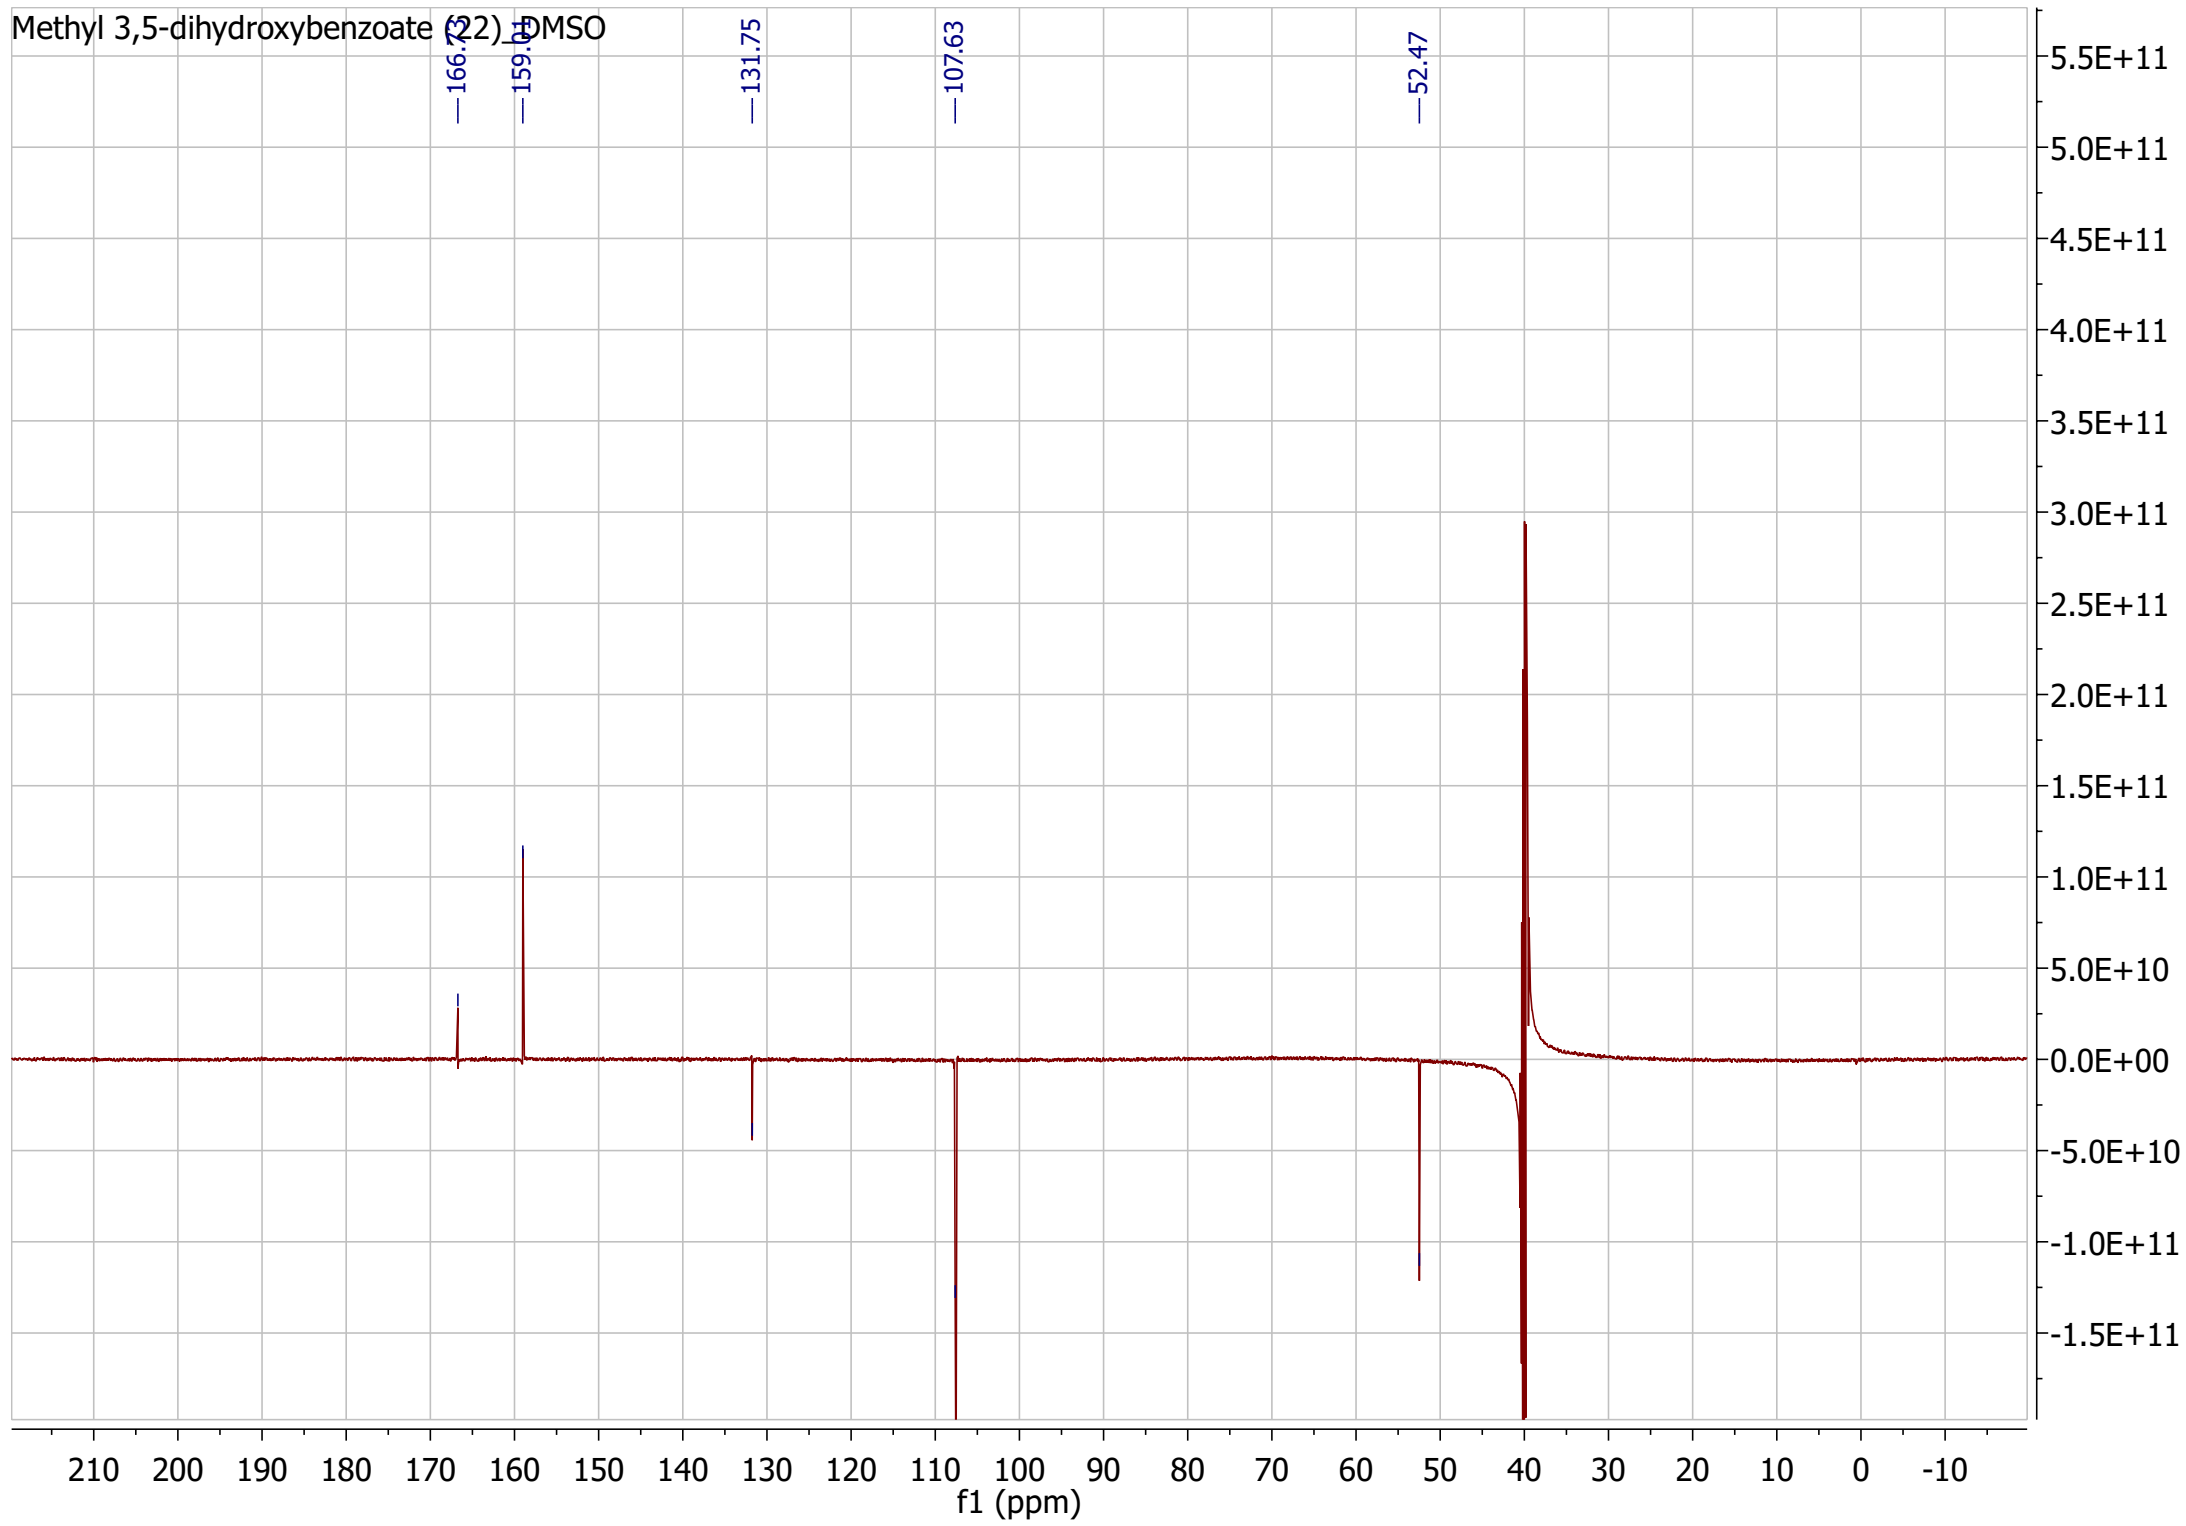

Methyl 3,4,5-triacetoxybenzoate(24)\_DMSO

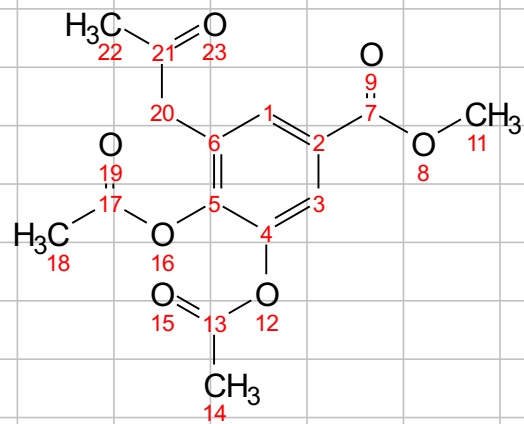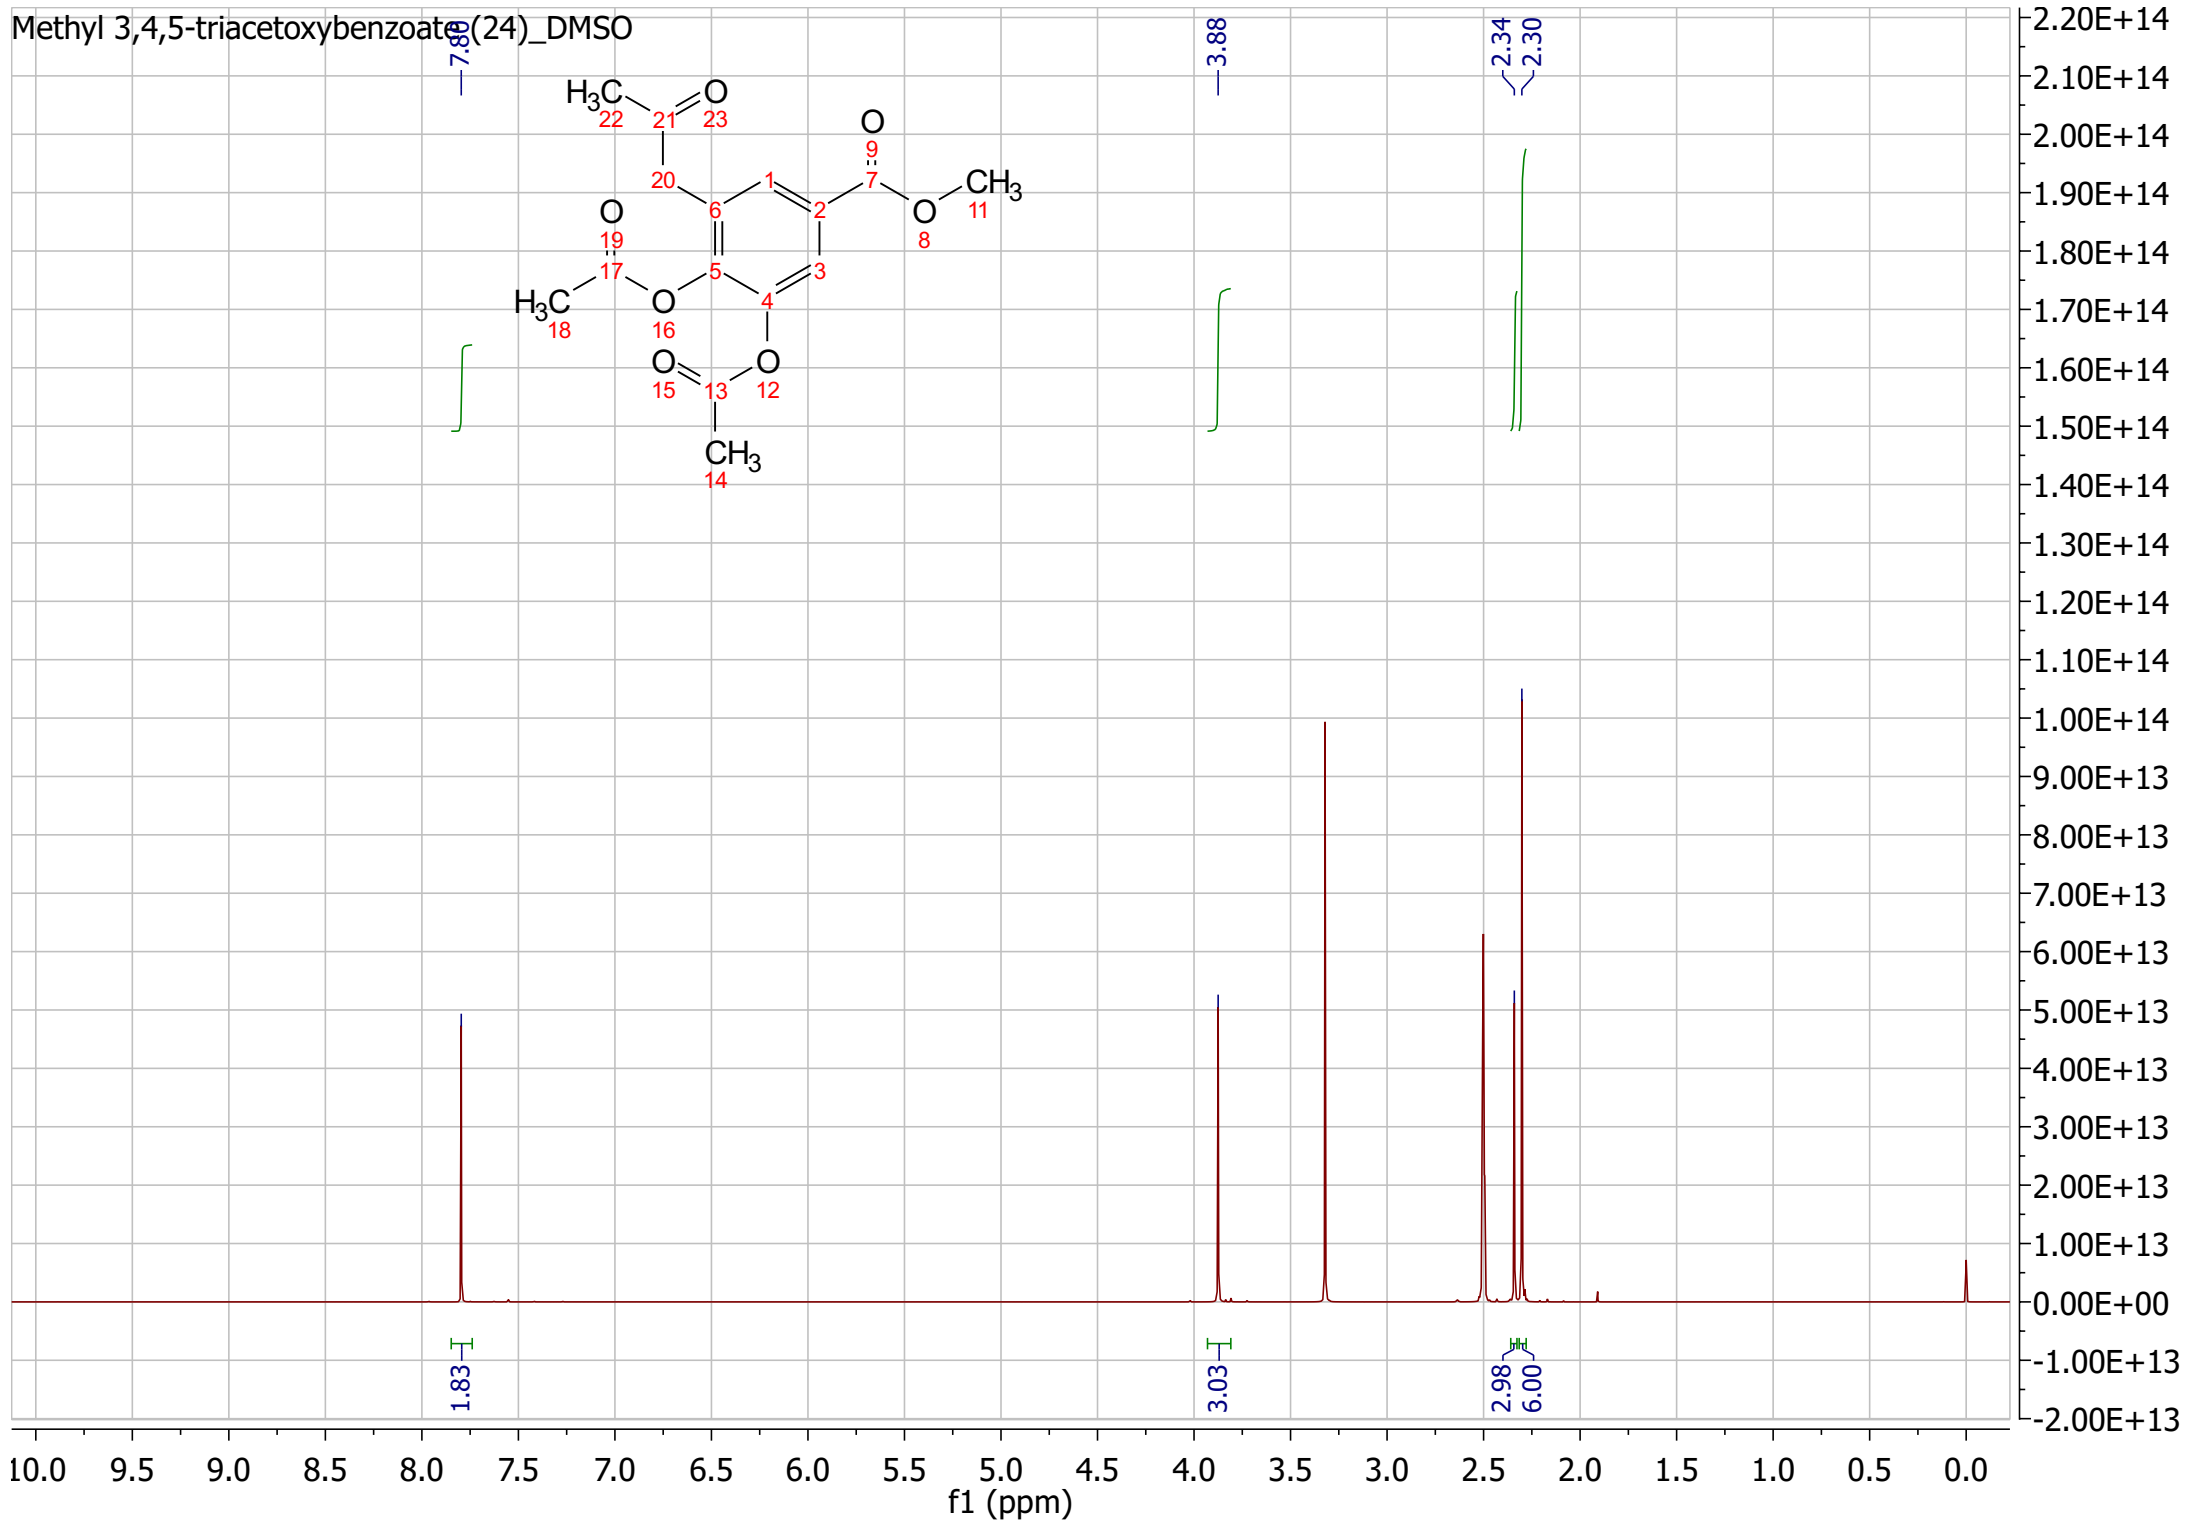

Methyl 3,4,5-triacetoxybenzoate (64)\_DMSO

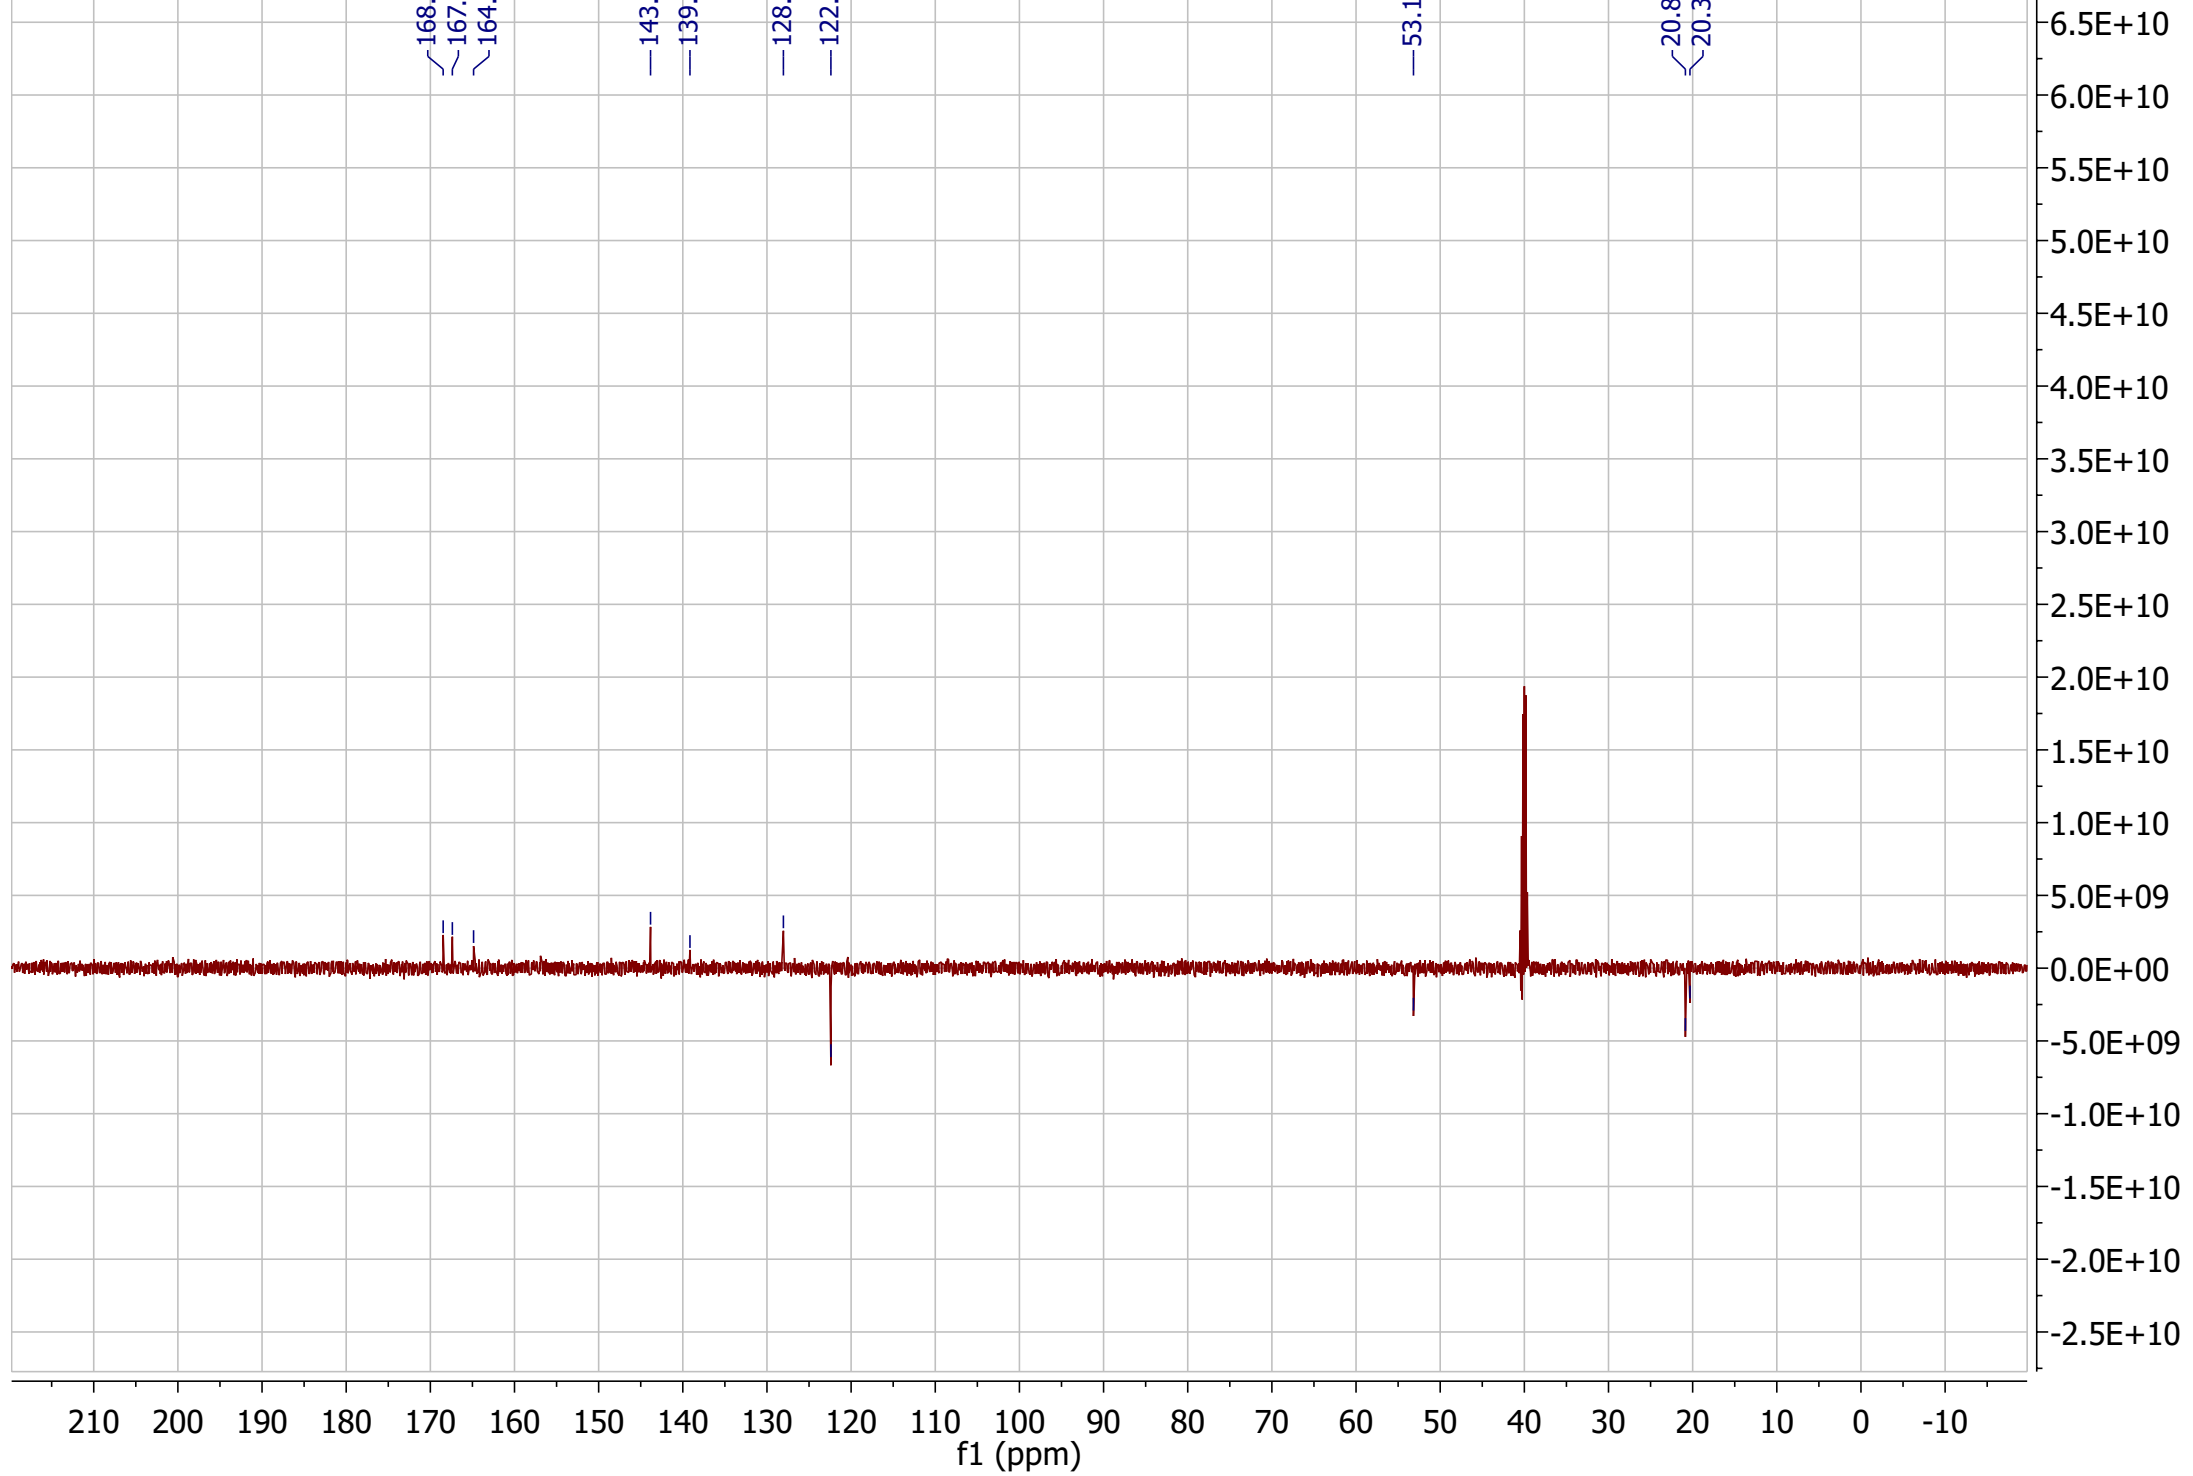



Methyl 4-benzoxy-3,5-diacetoxybenzoate (38)\_DMSO

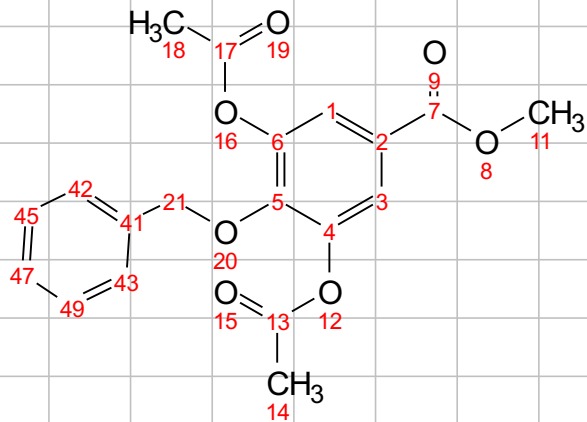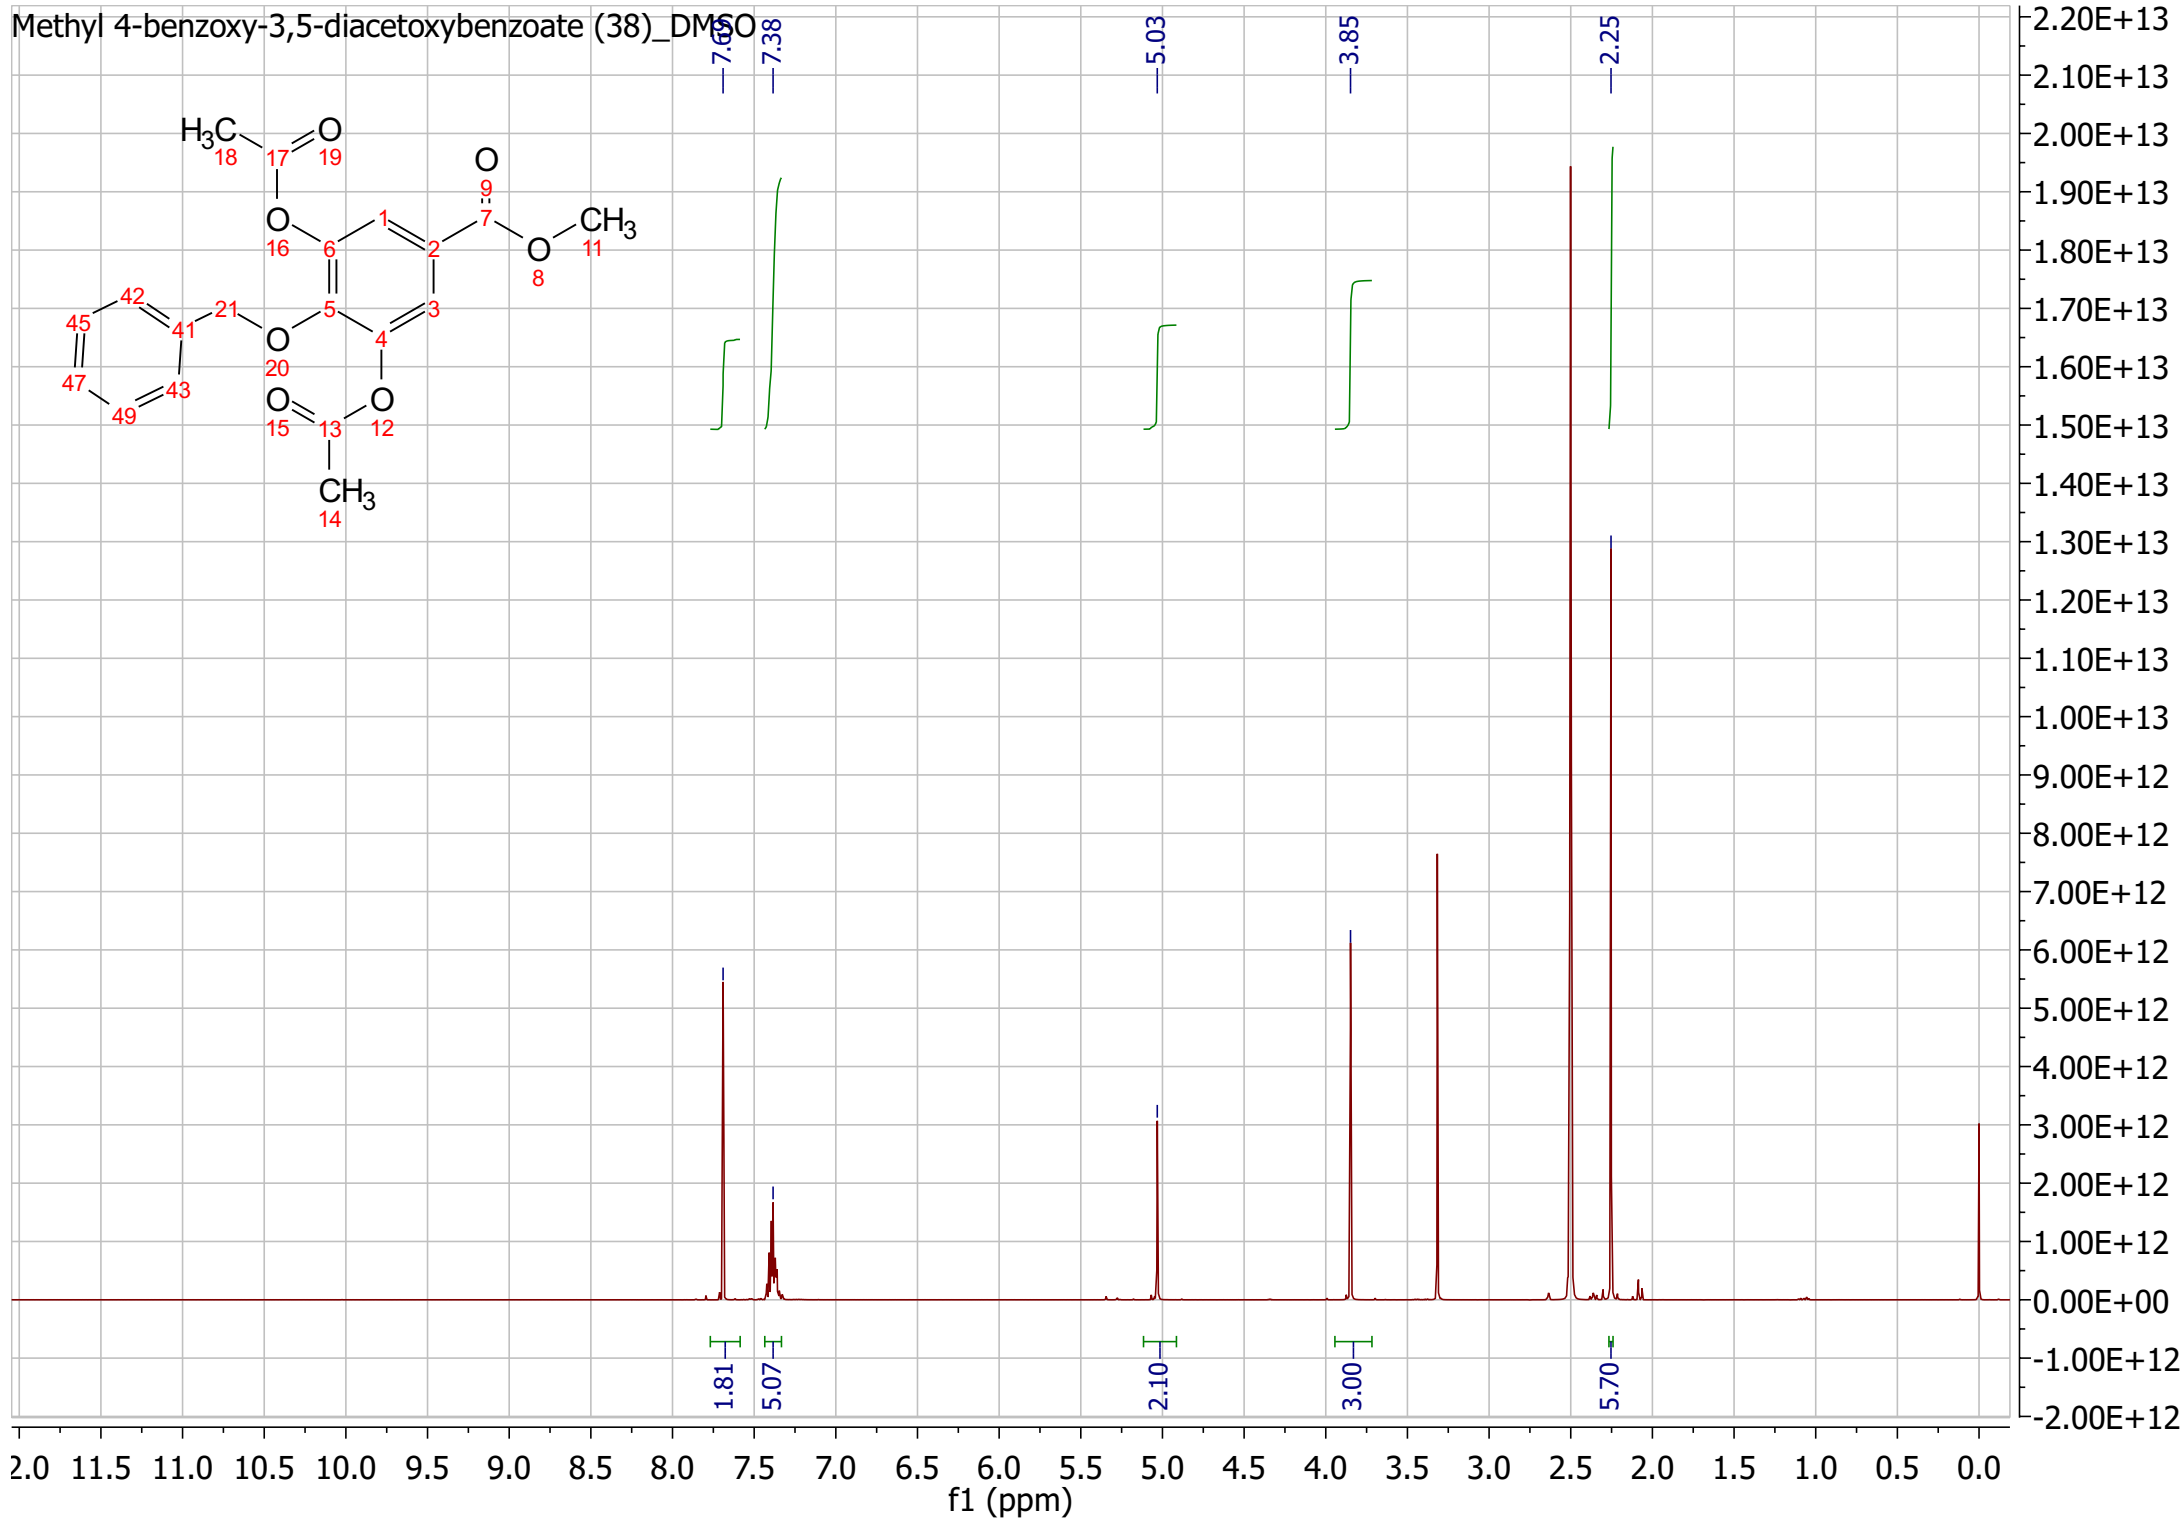

Methyl 4-benzyloxy-3,5-diacetoxybenzoate (88) DMSO

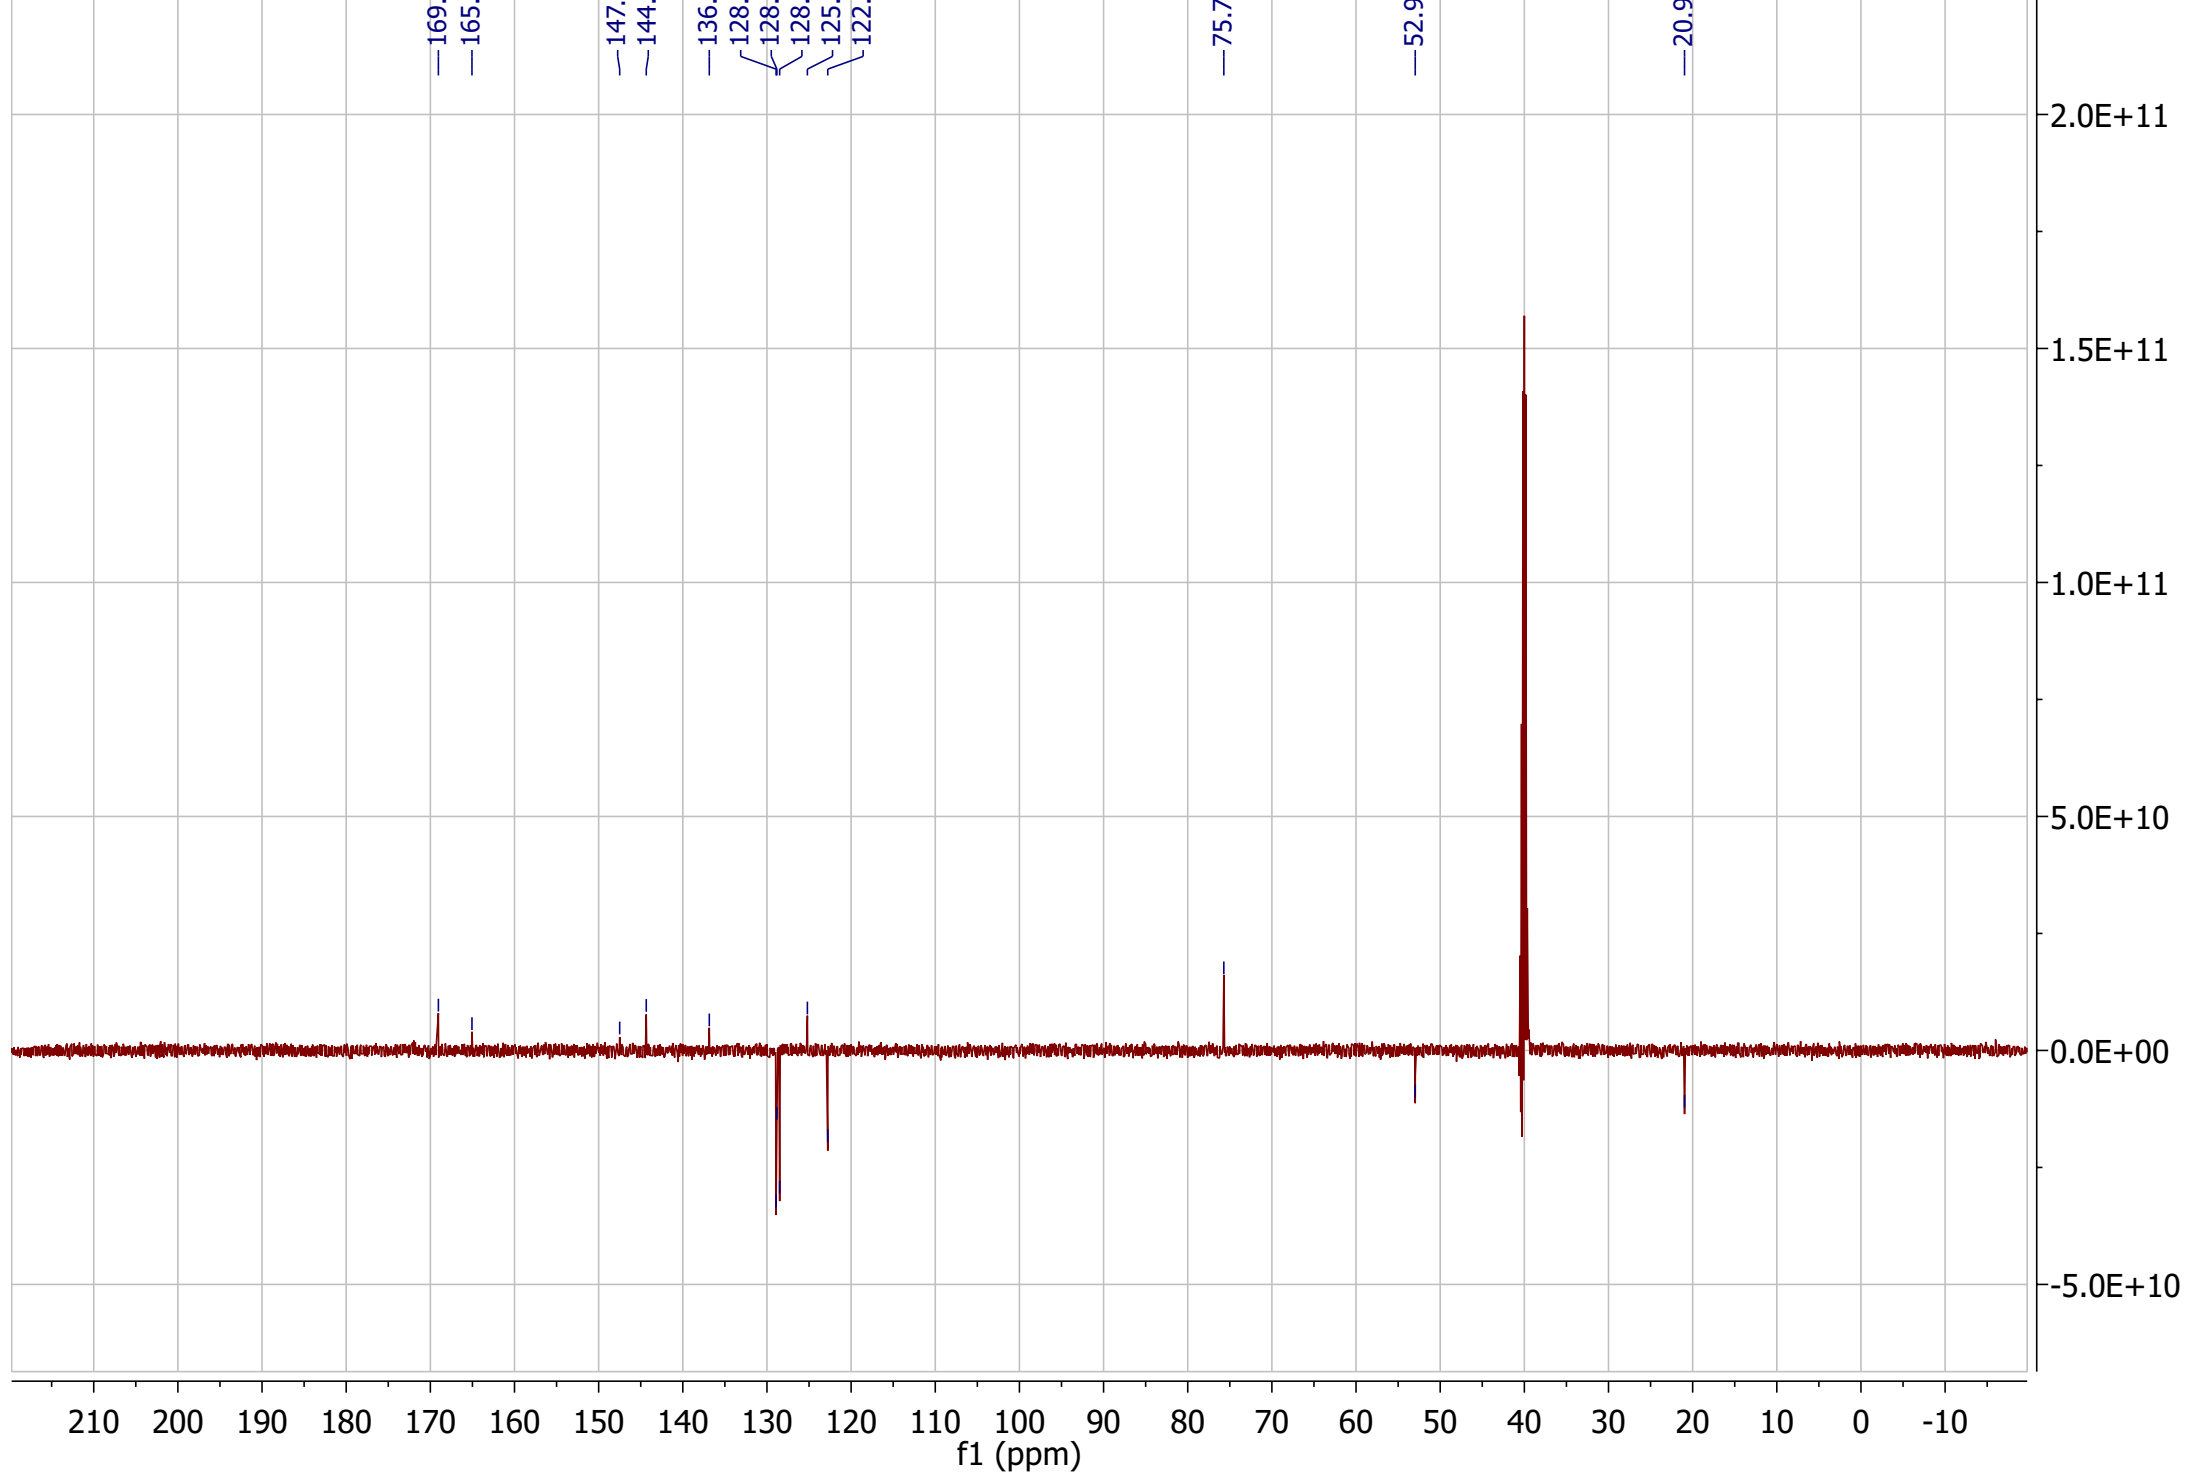

Methyl 4-naphtyl-3,5-diacetoxybenzoate\_CDCI3

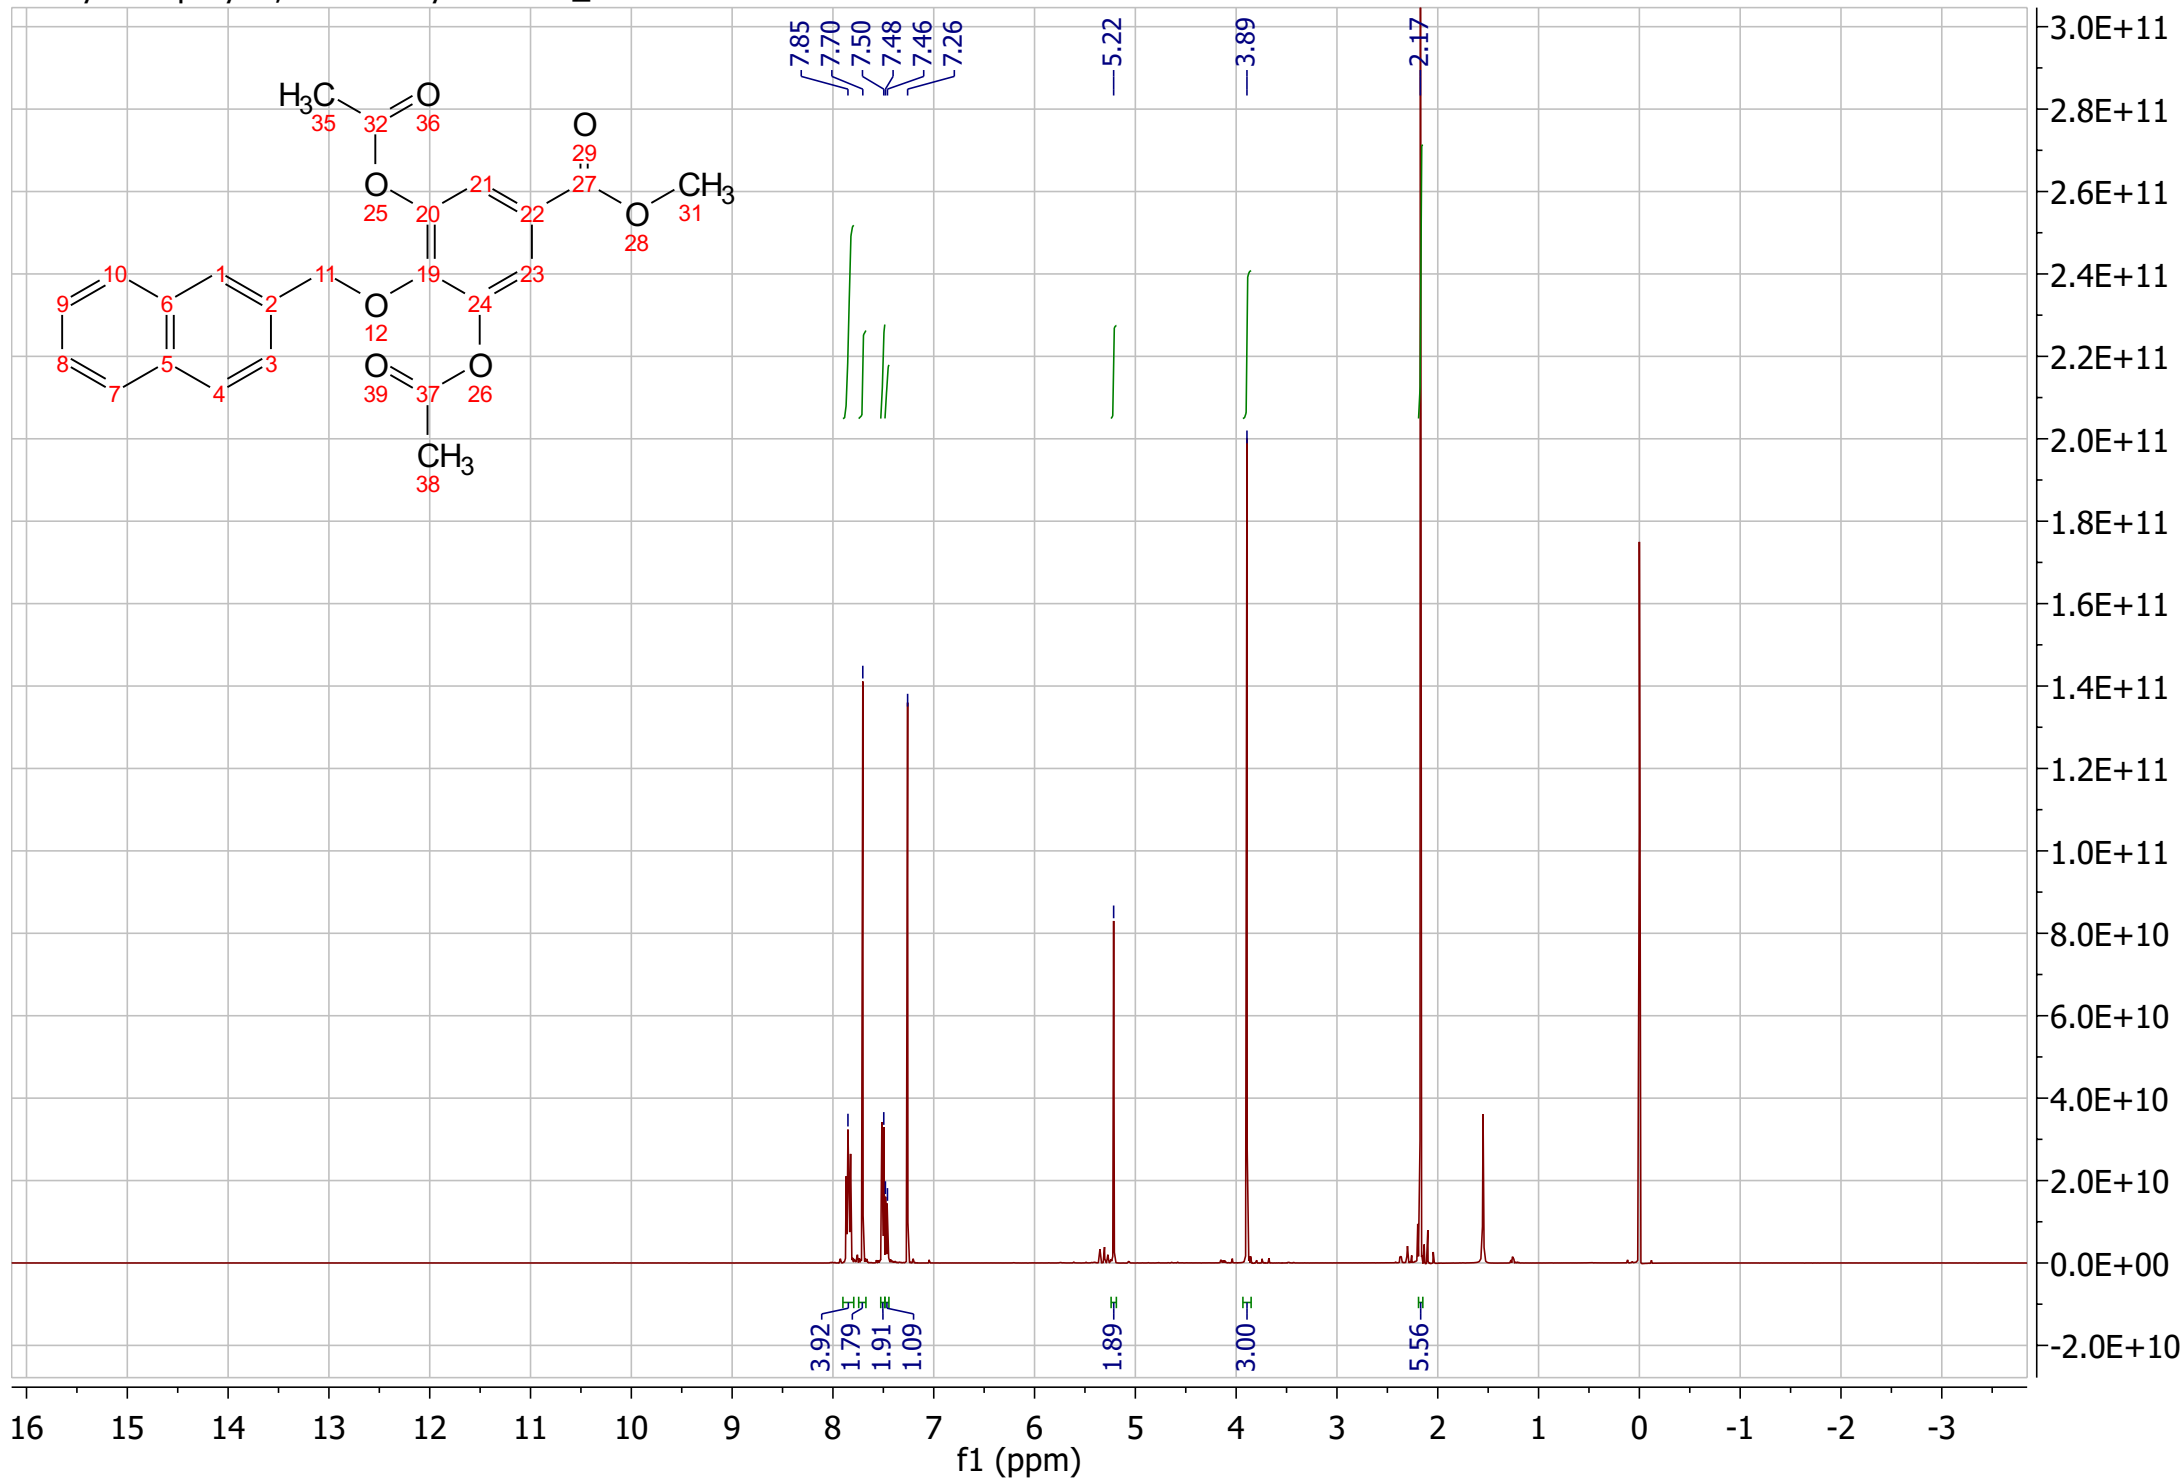

Methyl 4-naphtyl-3,5-diacetoxybenzoate\_CDCl3

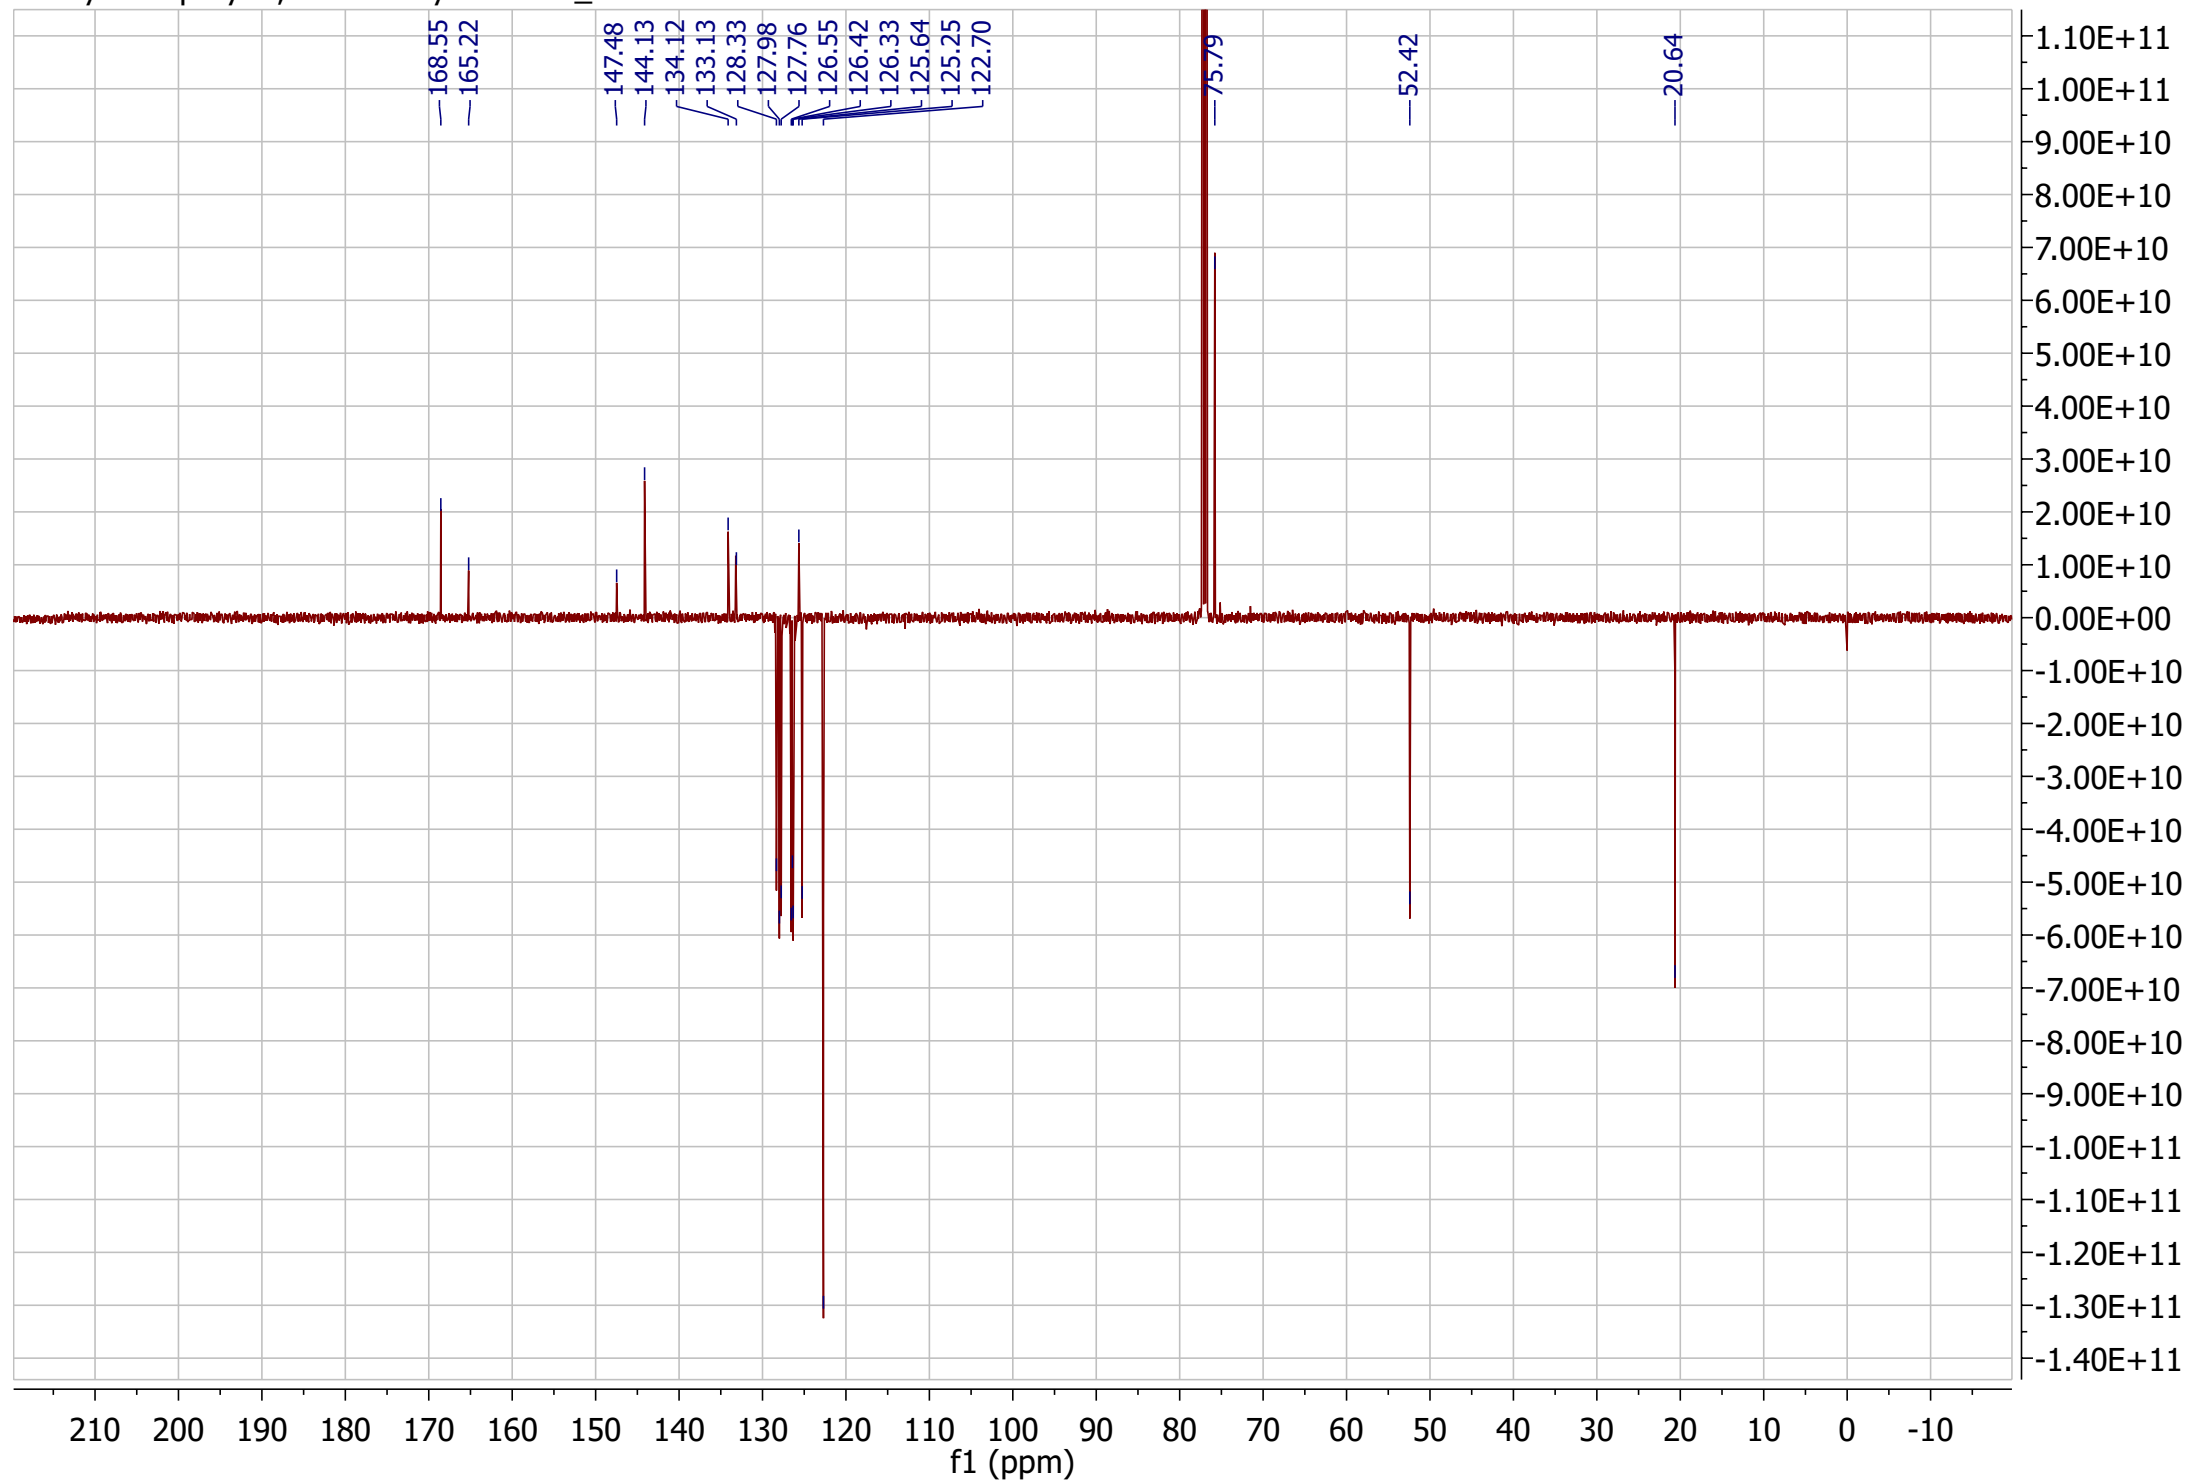

Methyl 4-(4-methoxybenzoxy)-3,5-diacetoxybenzoate\_CDCl3

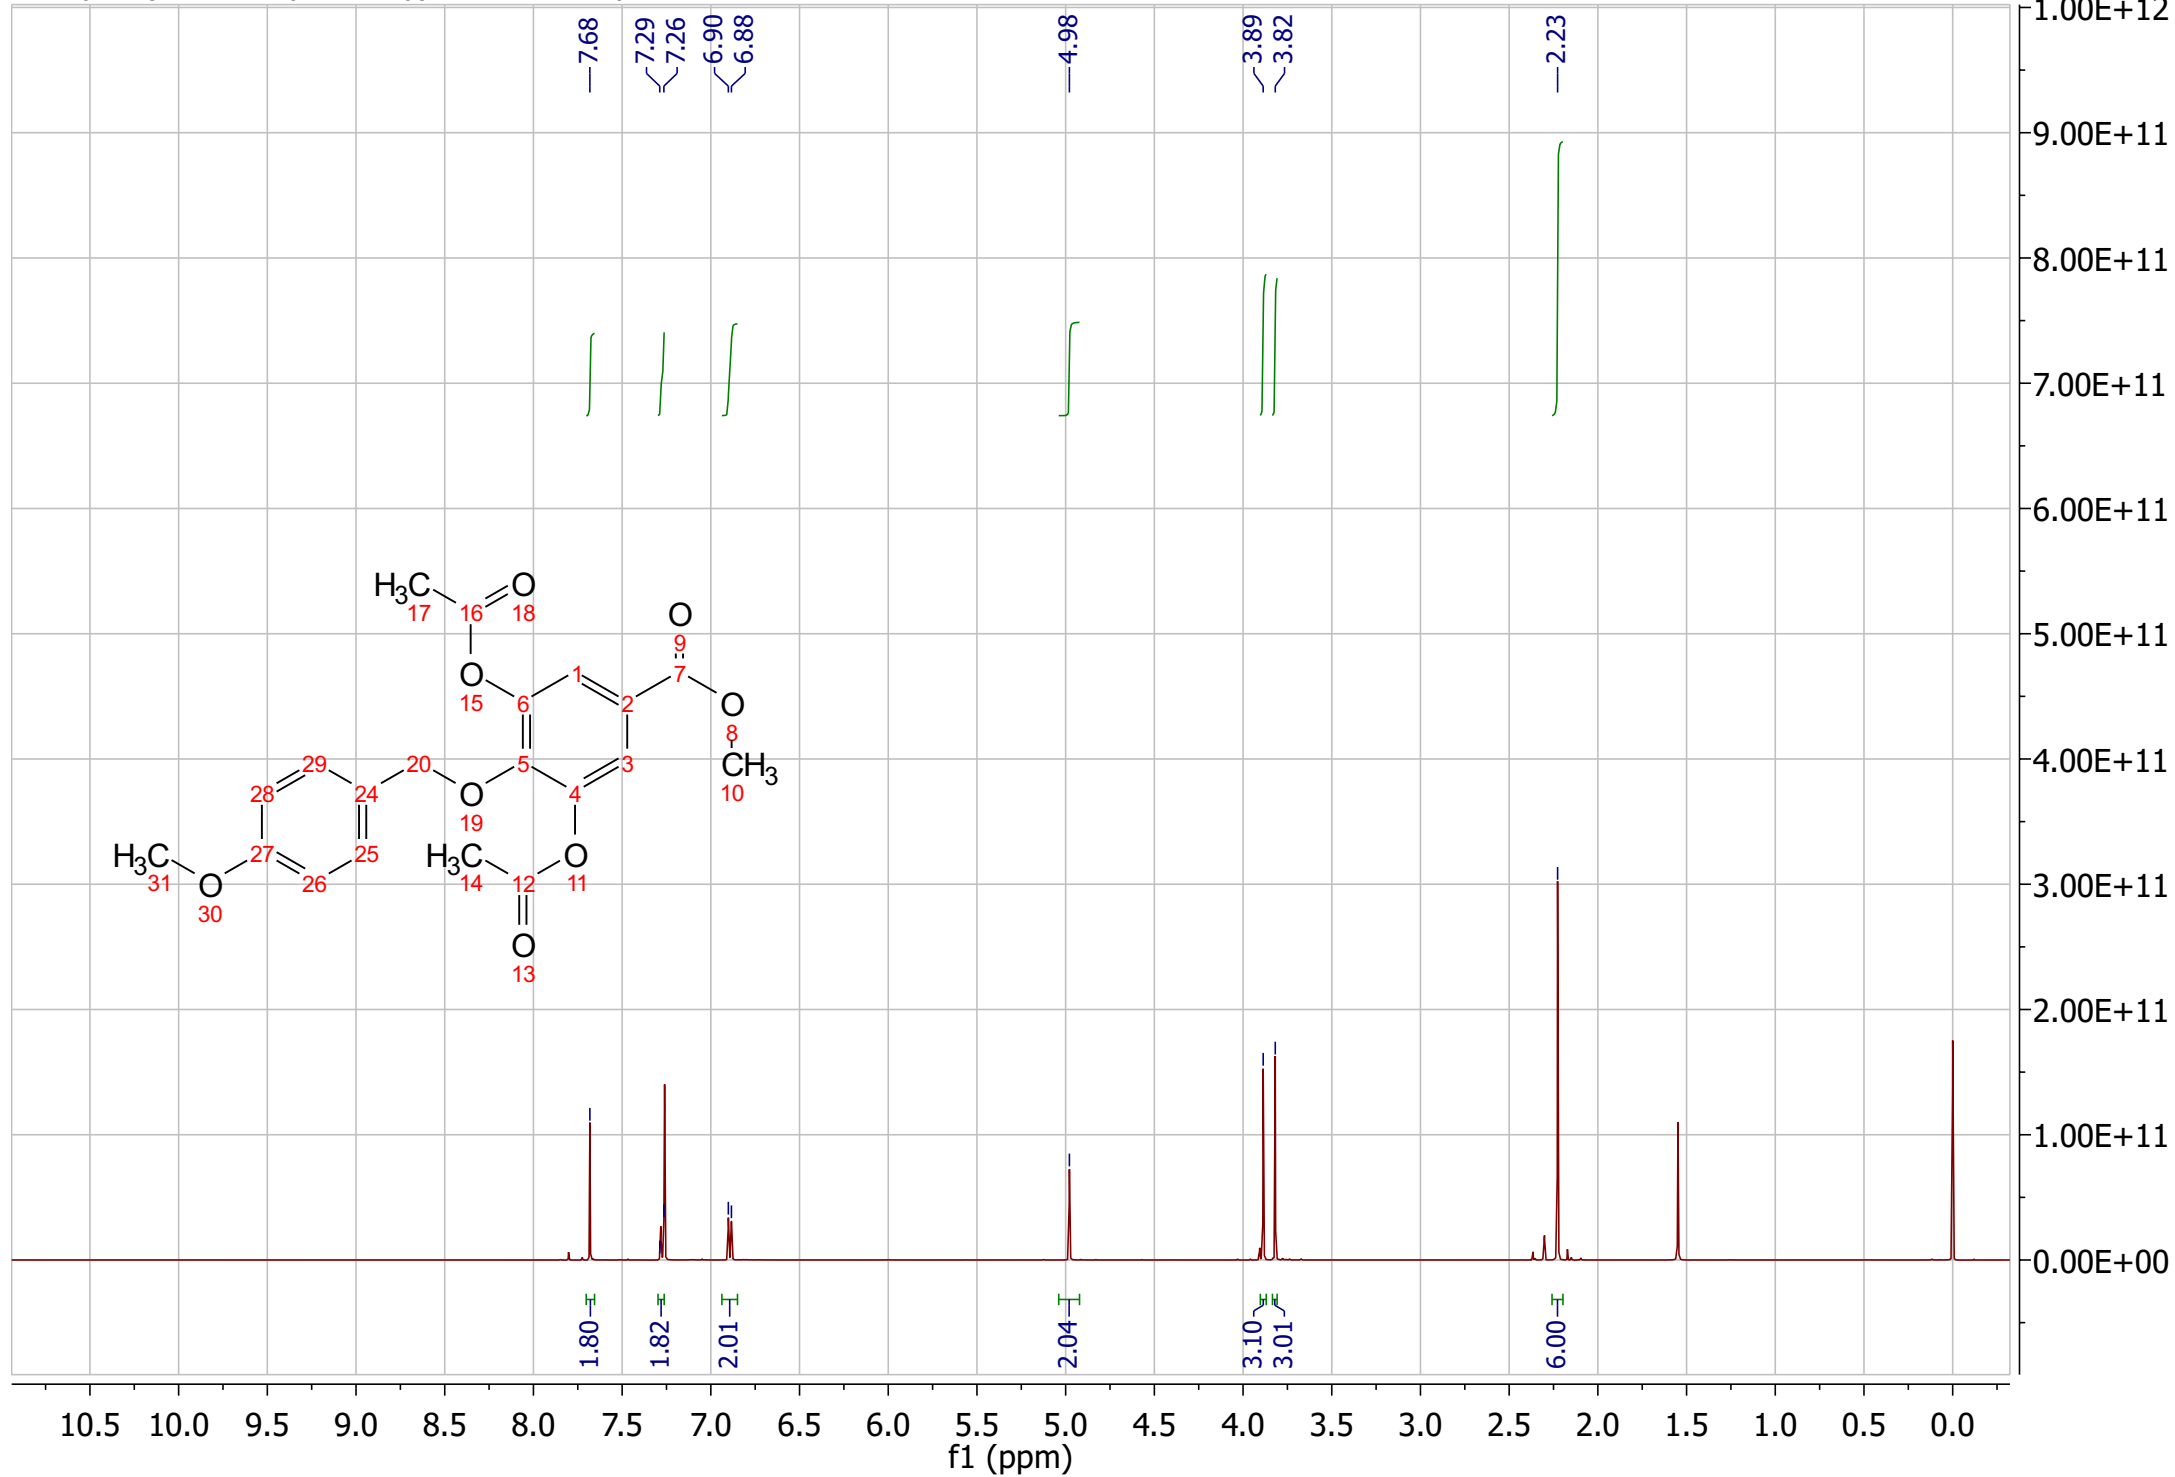

Methyl 4-(4-methoxybenzoxy)-3,5-diacetoxybenzoate\_CDCl3

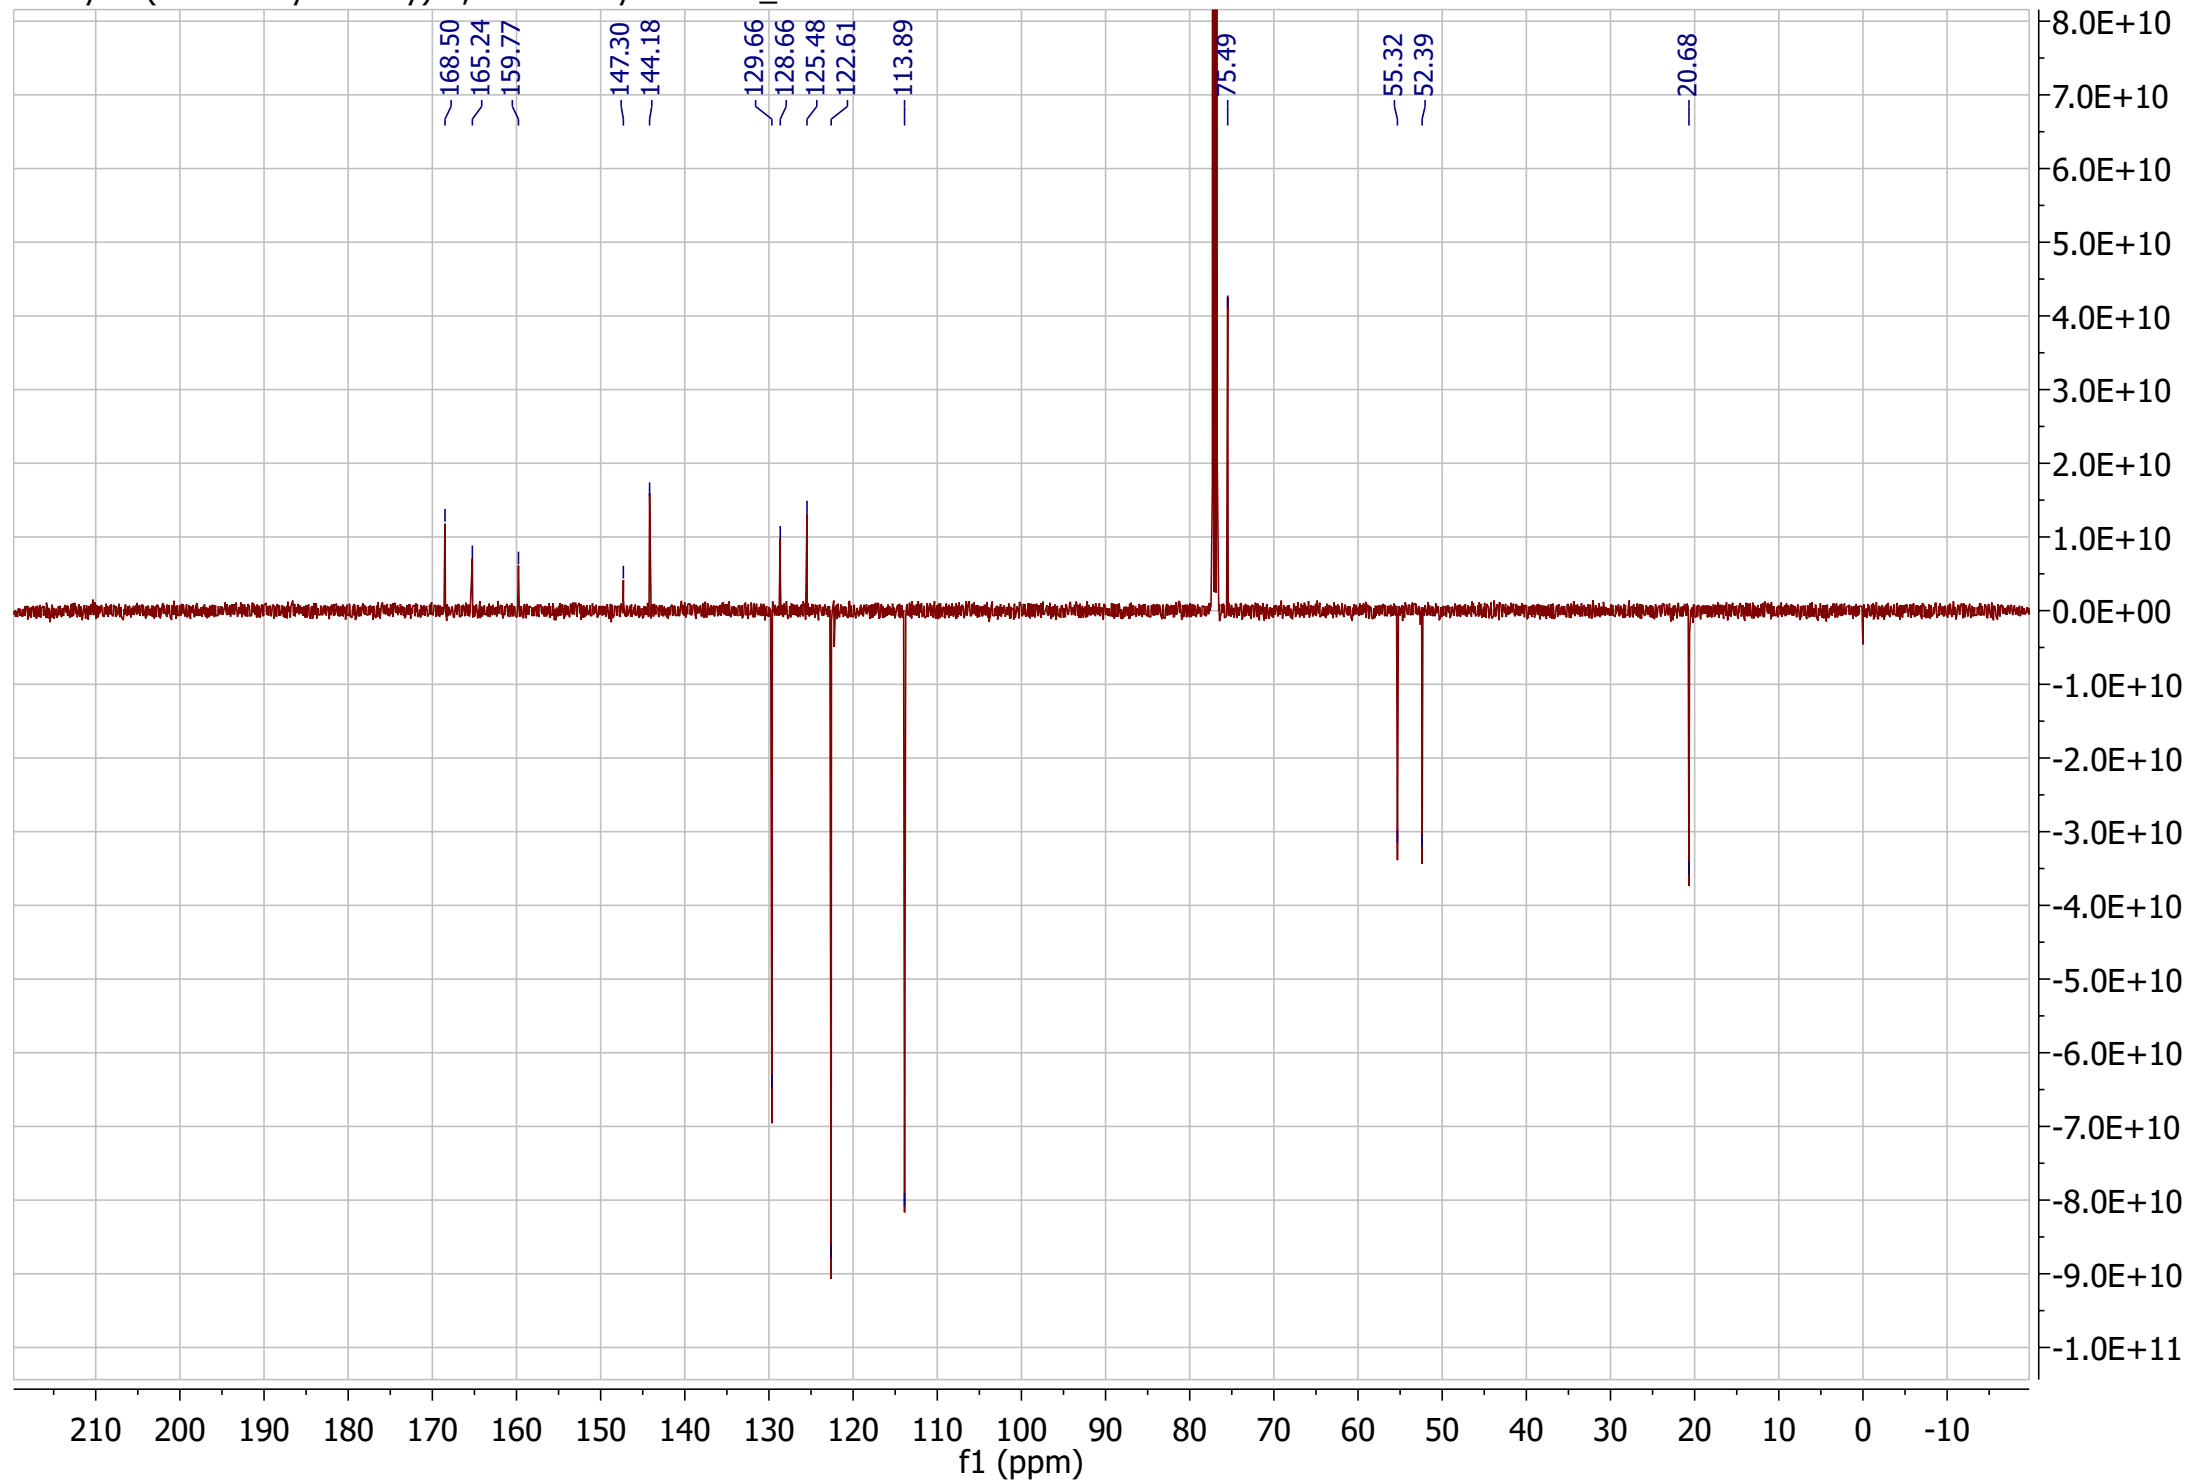

Methyl 4-(2-morpholinoethoxy)-3,5-diacetoxybenzoate\_DMSO

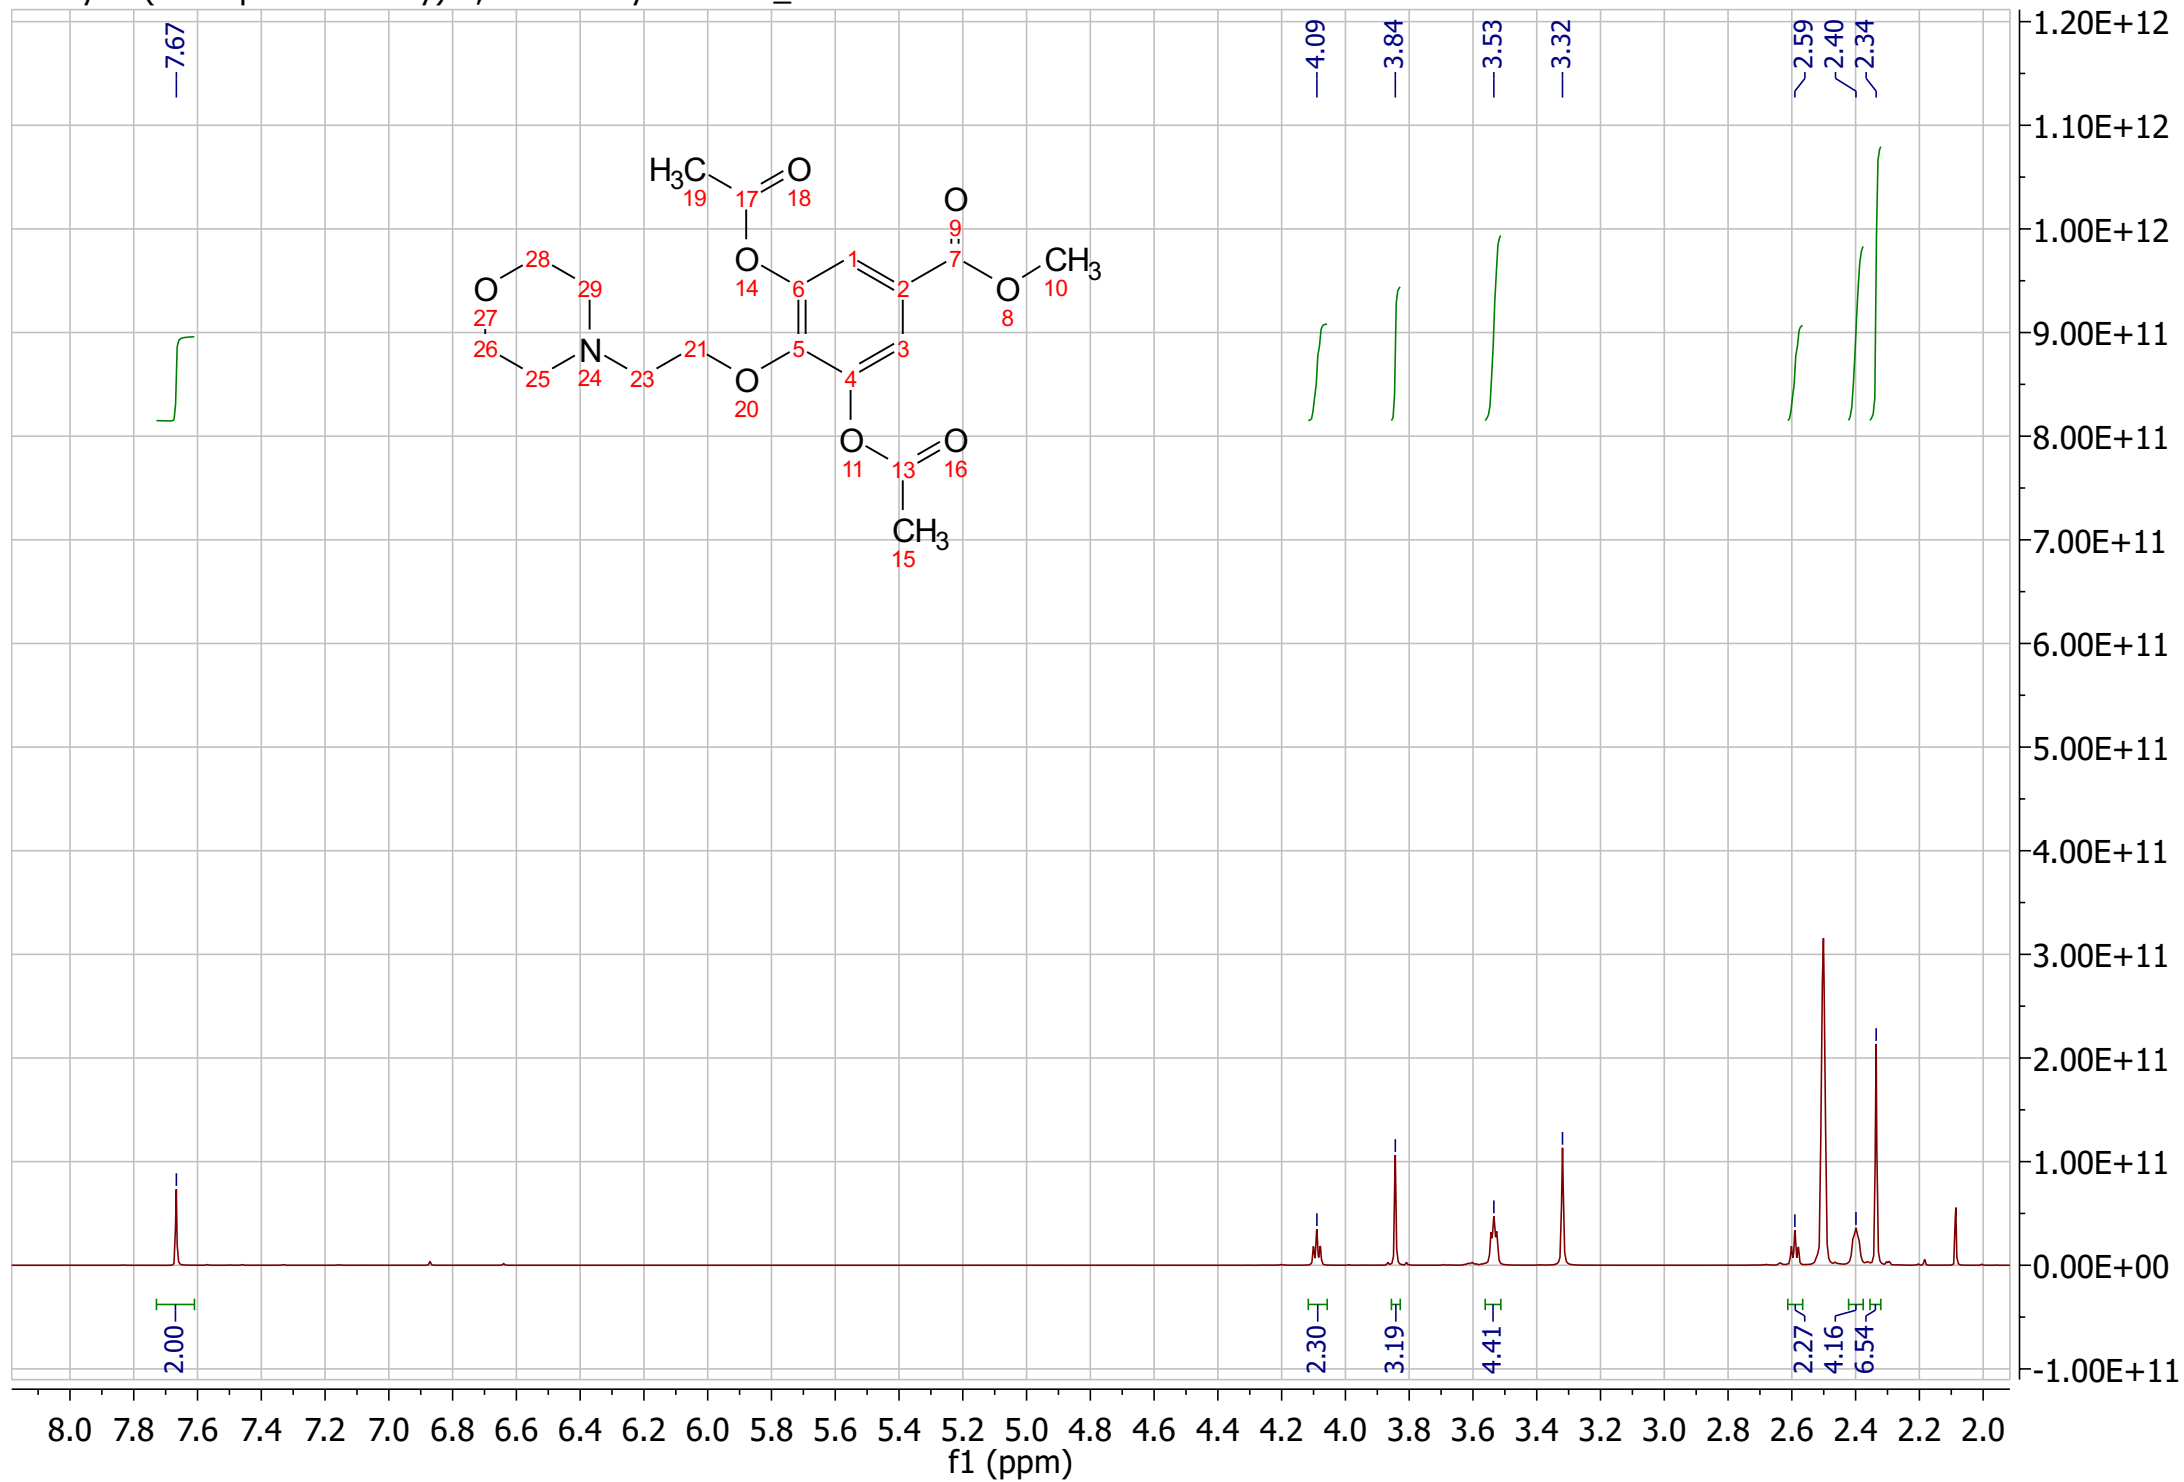

Methyl 4-(2-morpholinoethoxy)-3,5-diacetoxybenzoate\_DMSO

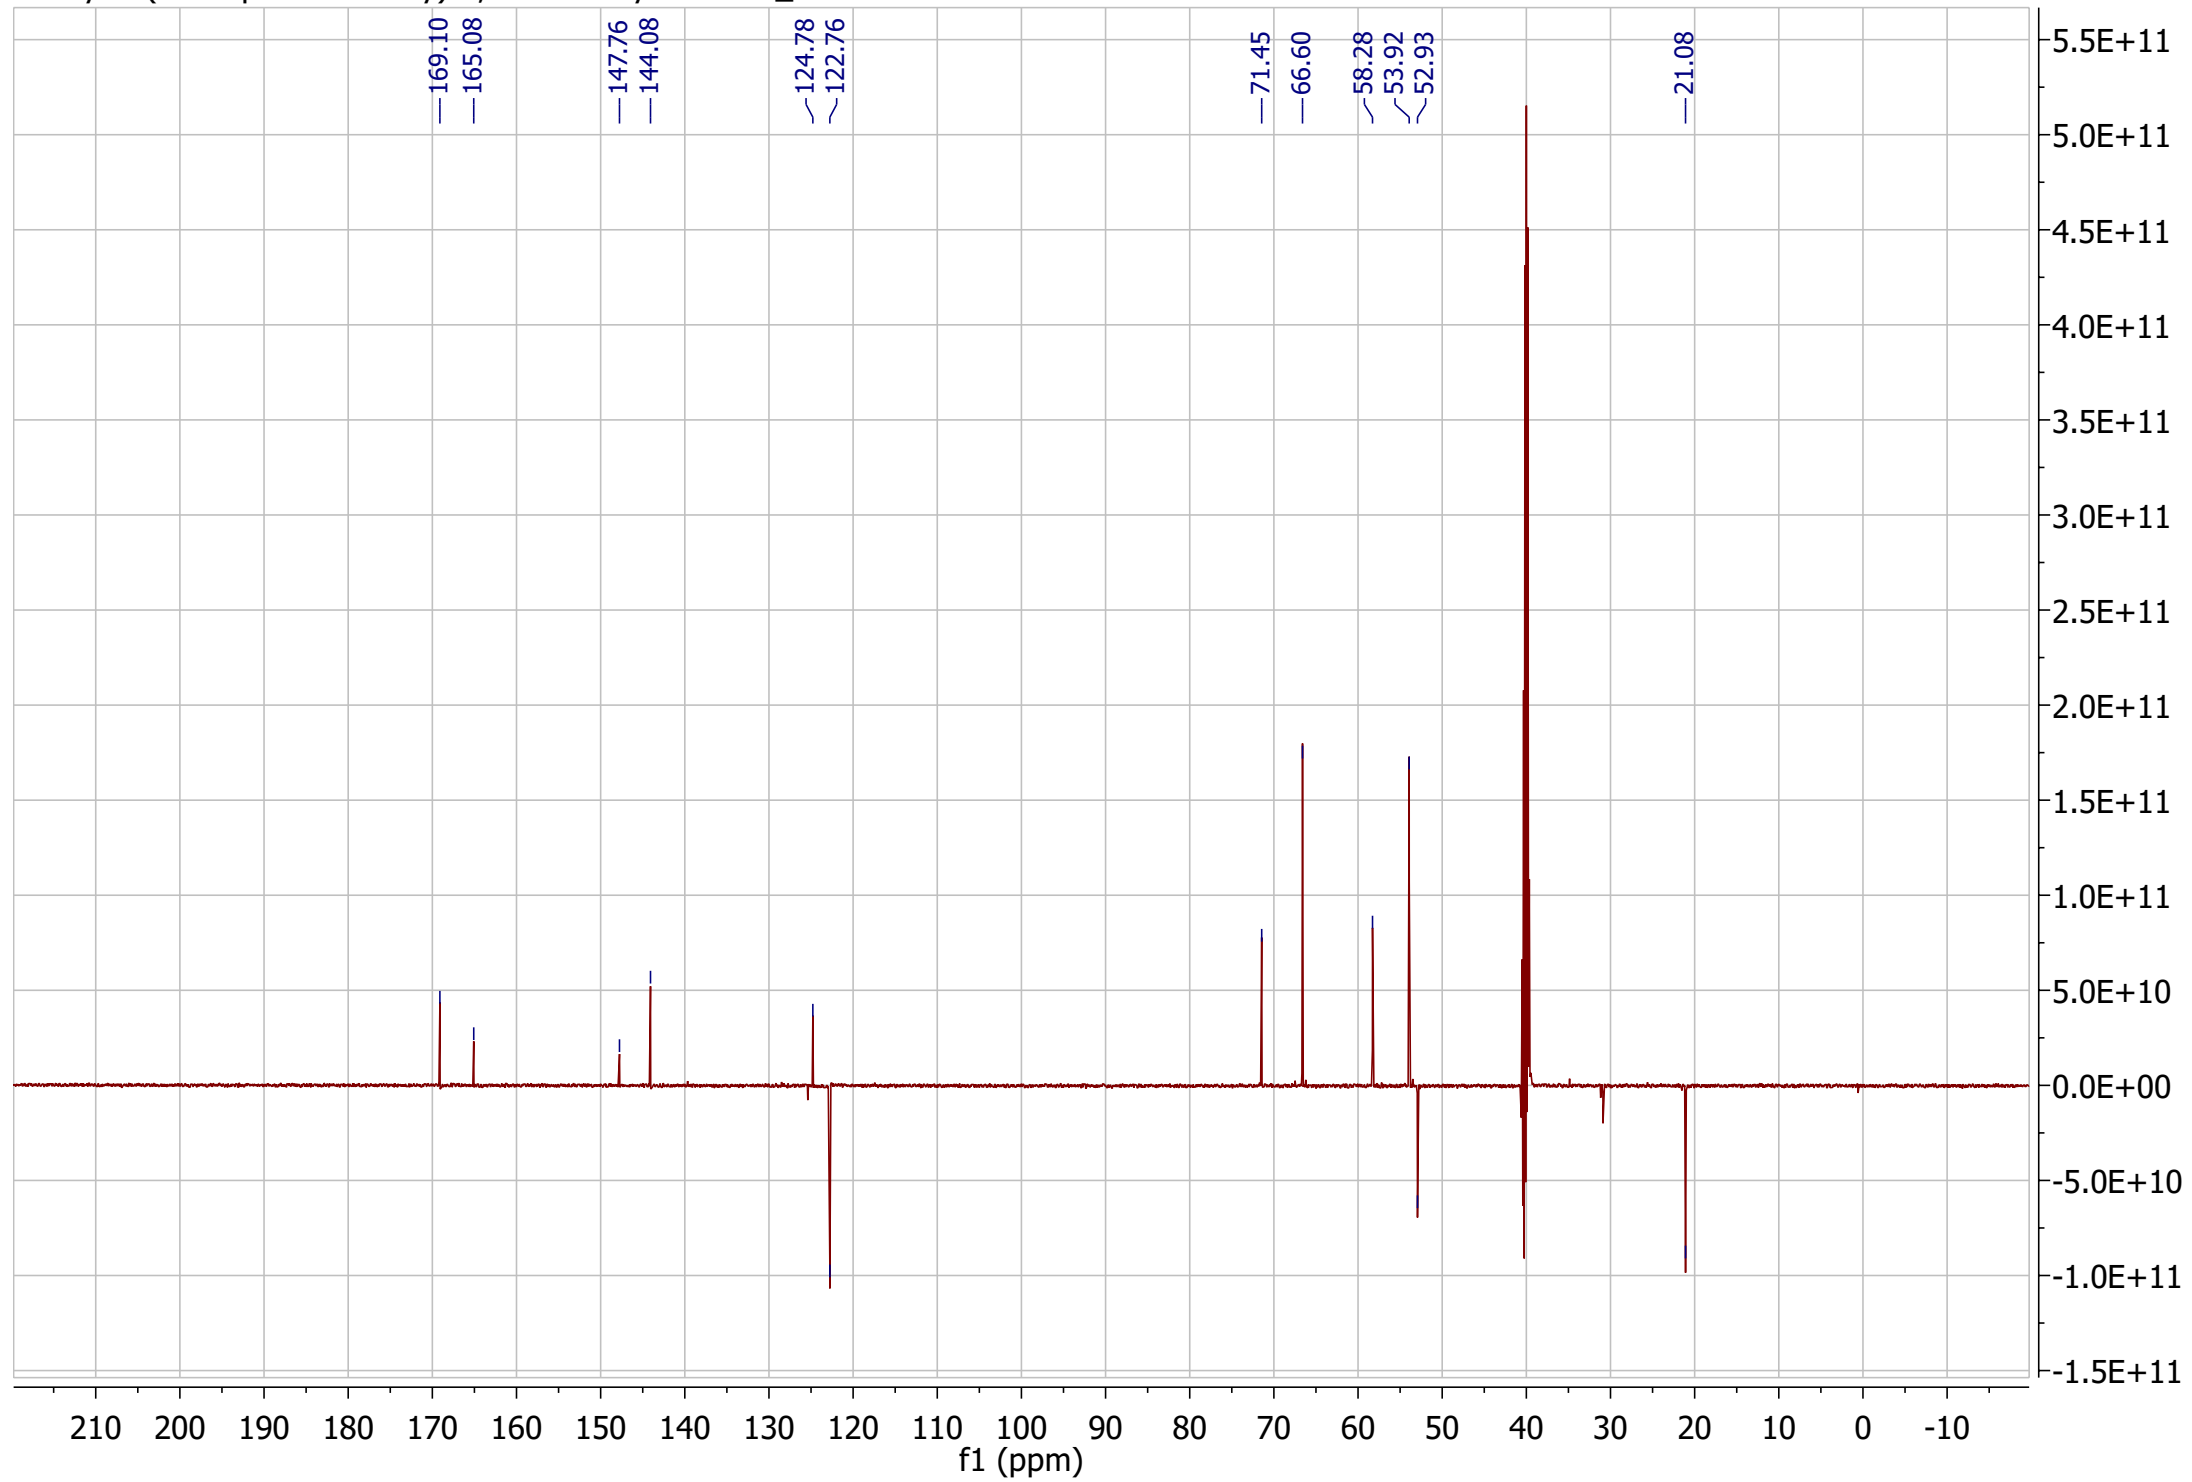



Methyl 4-benzoxy-3,5-dihydroxybenzoate (39) in DMSO

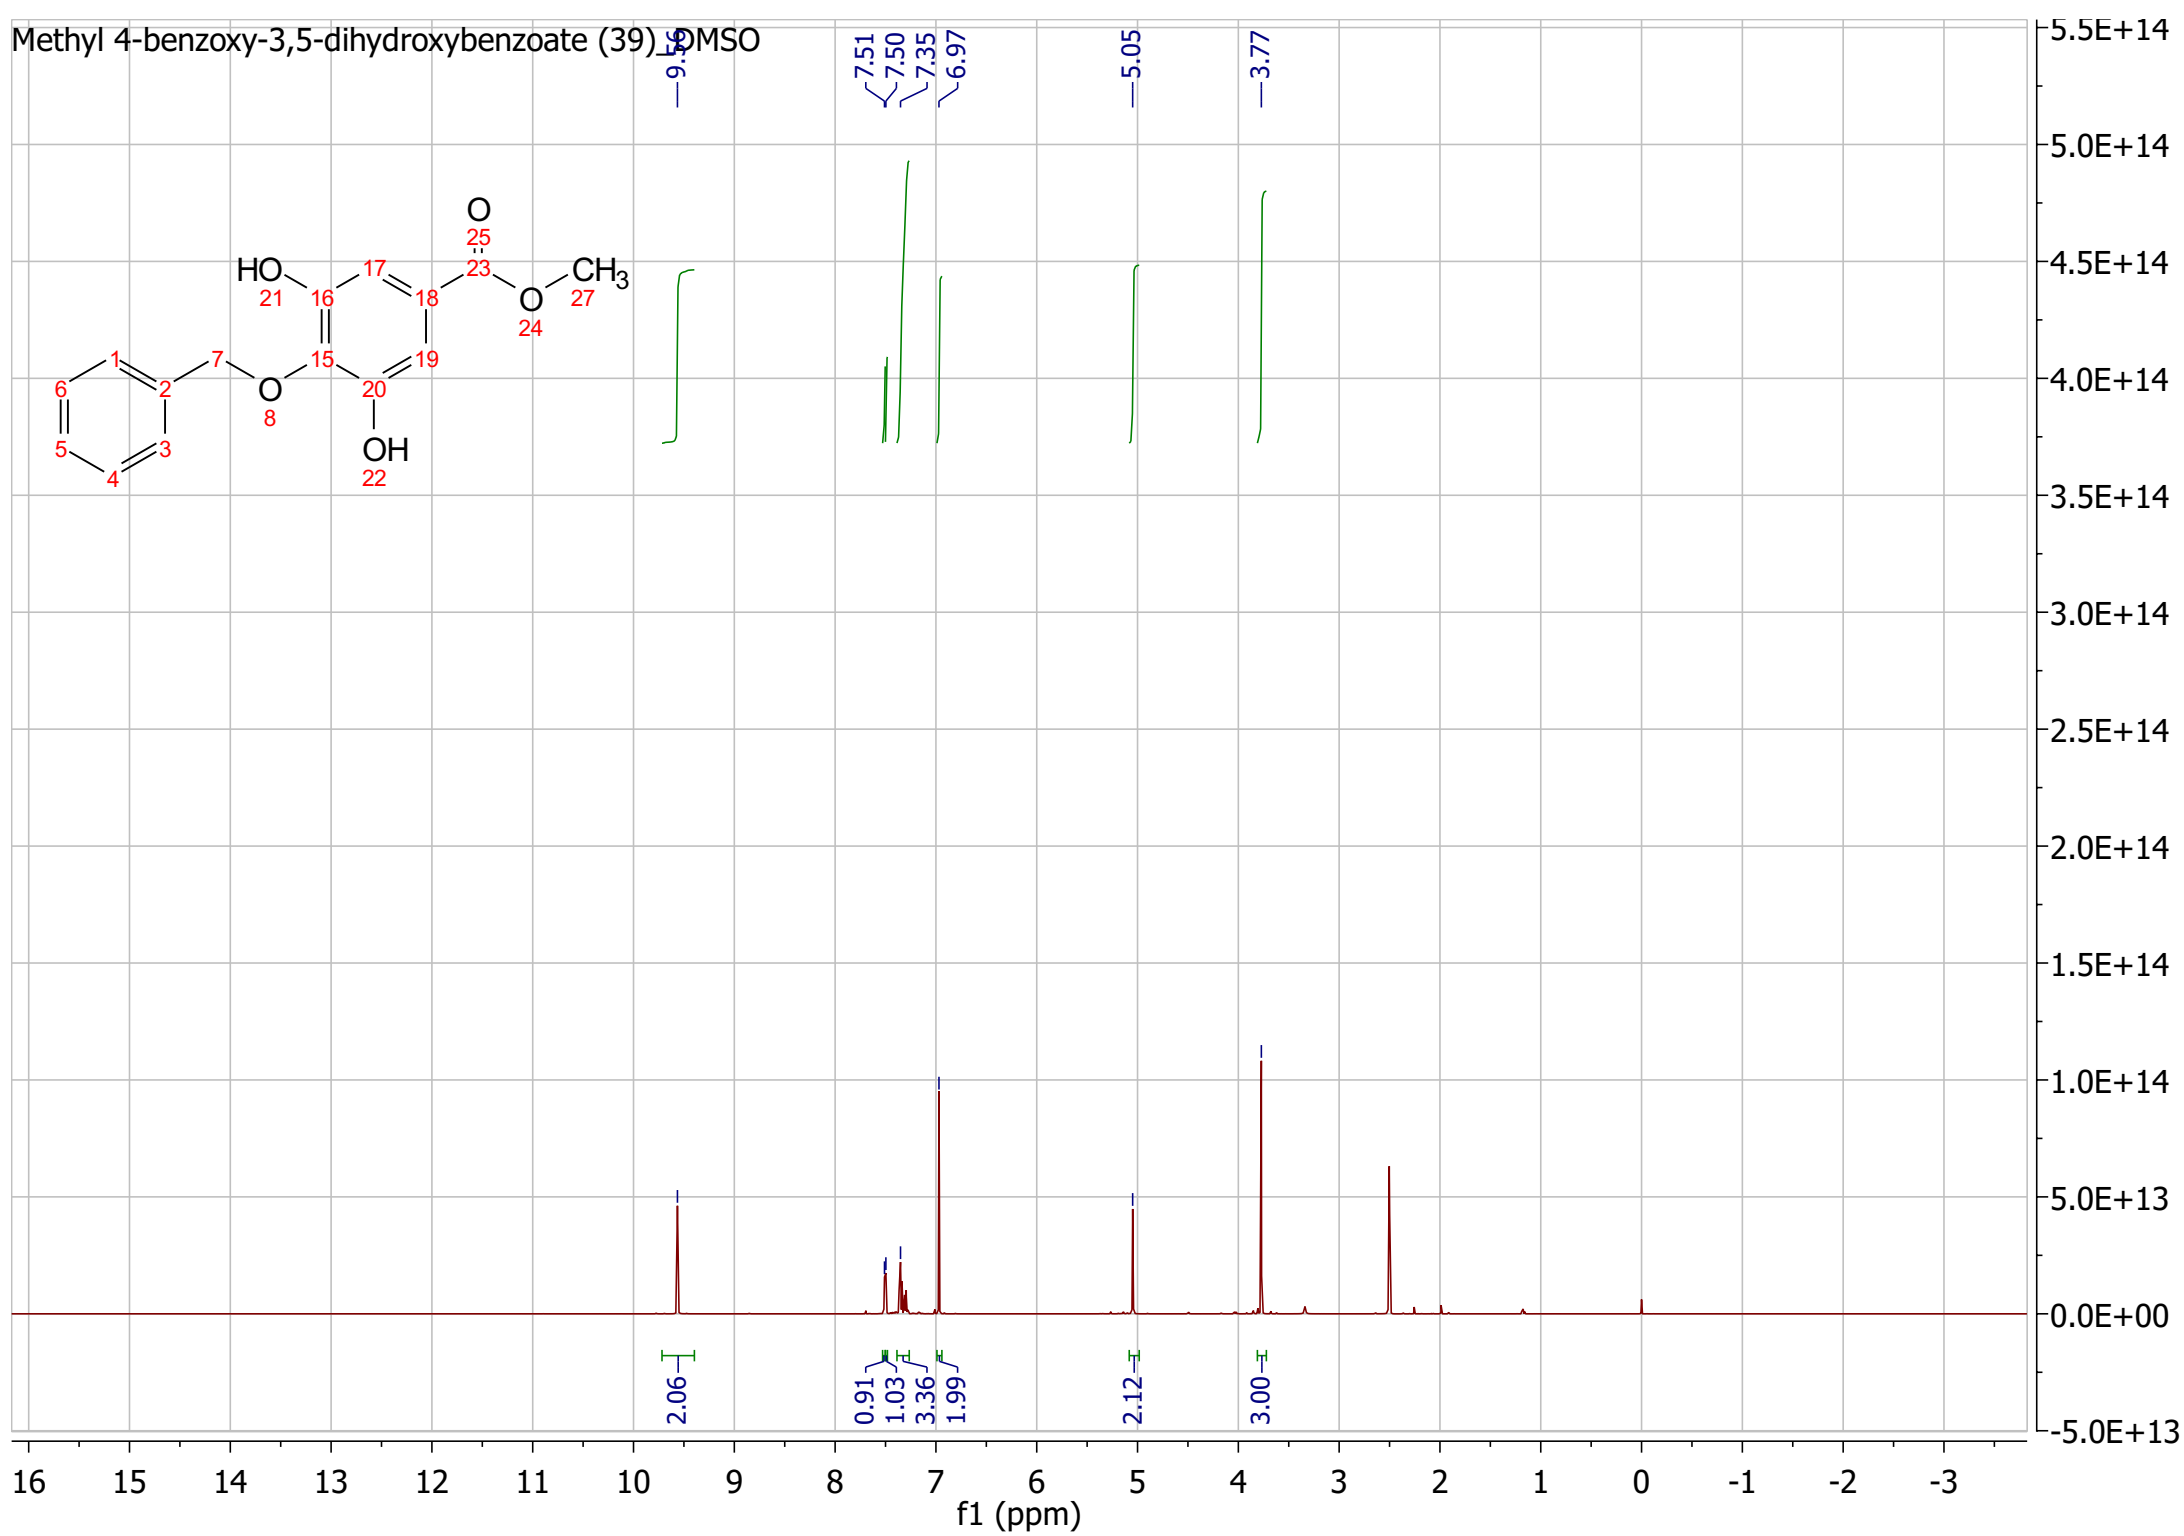

Methyl 4-benzyloxy-3,5-dihydroxybenzoate (39)

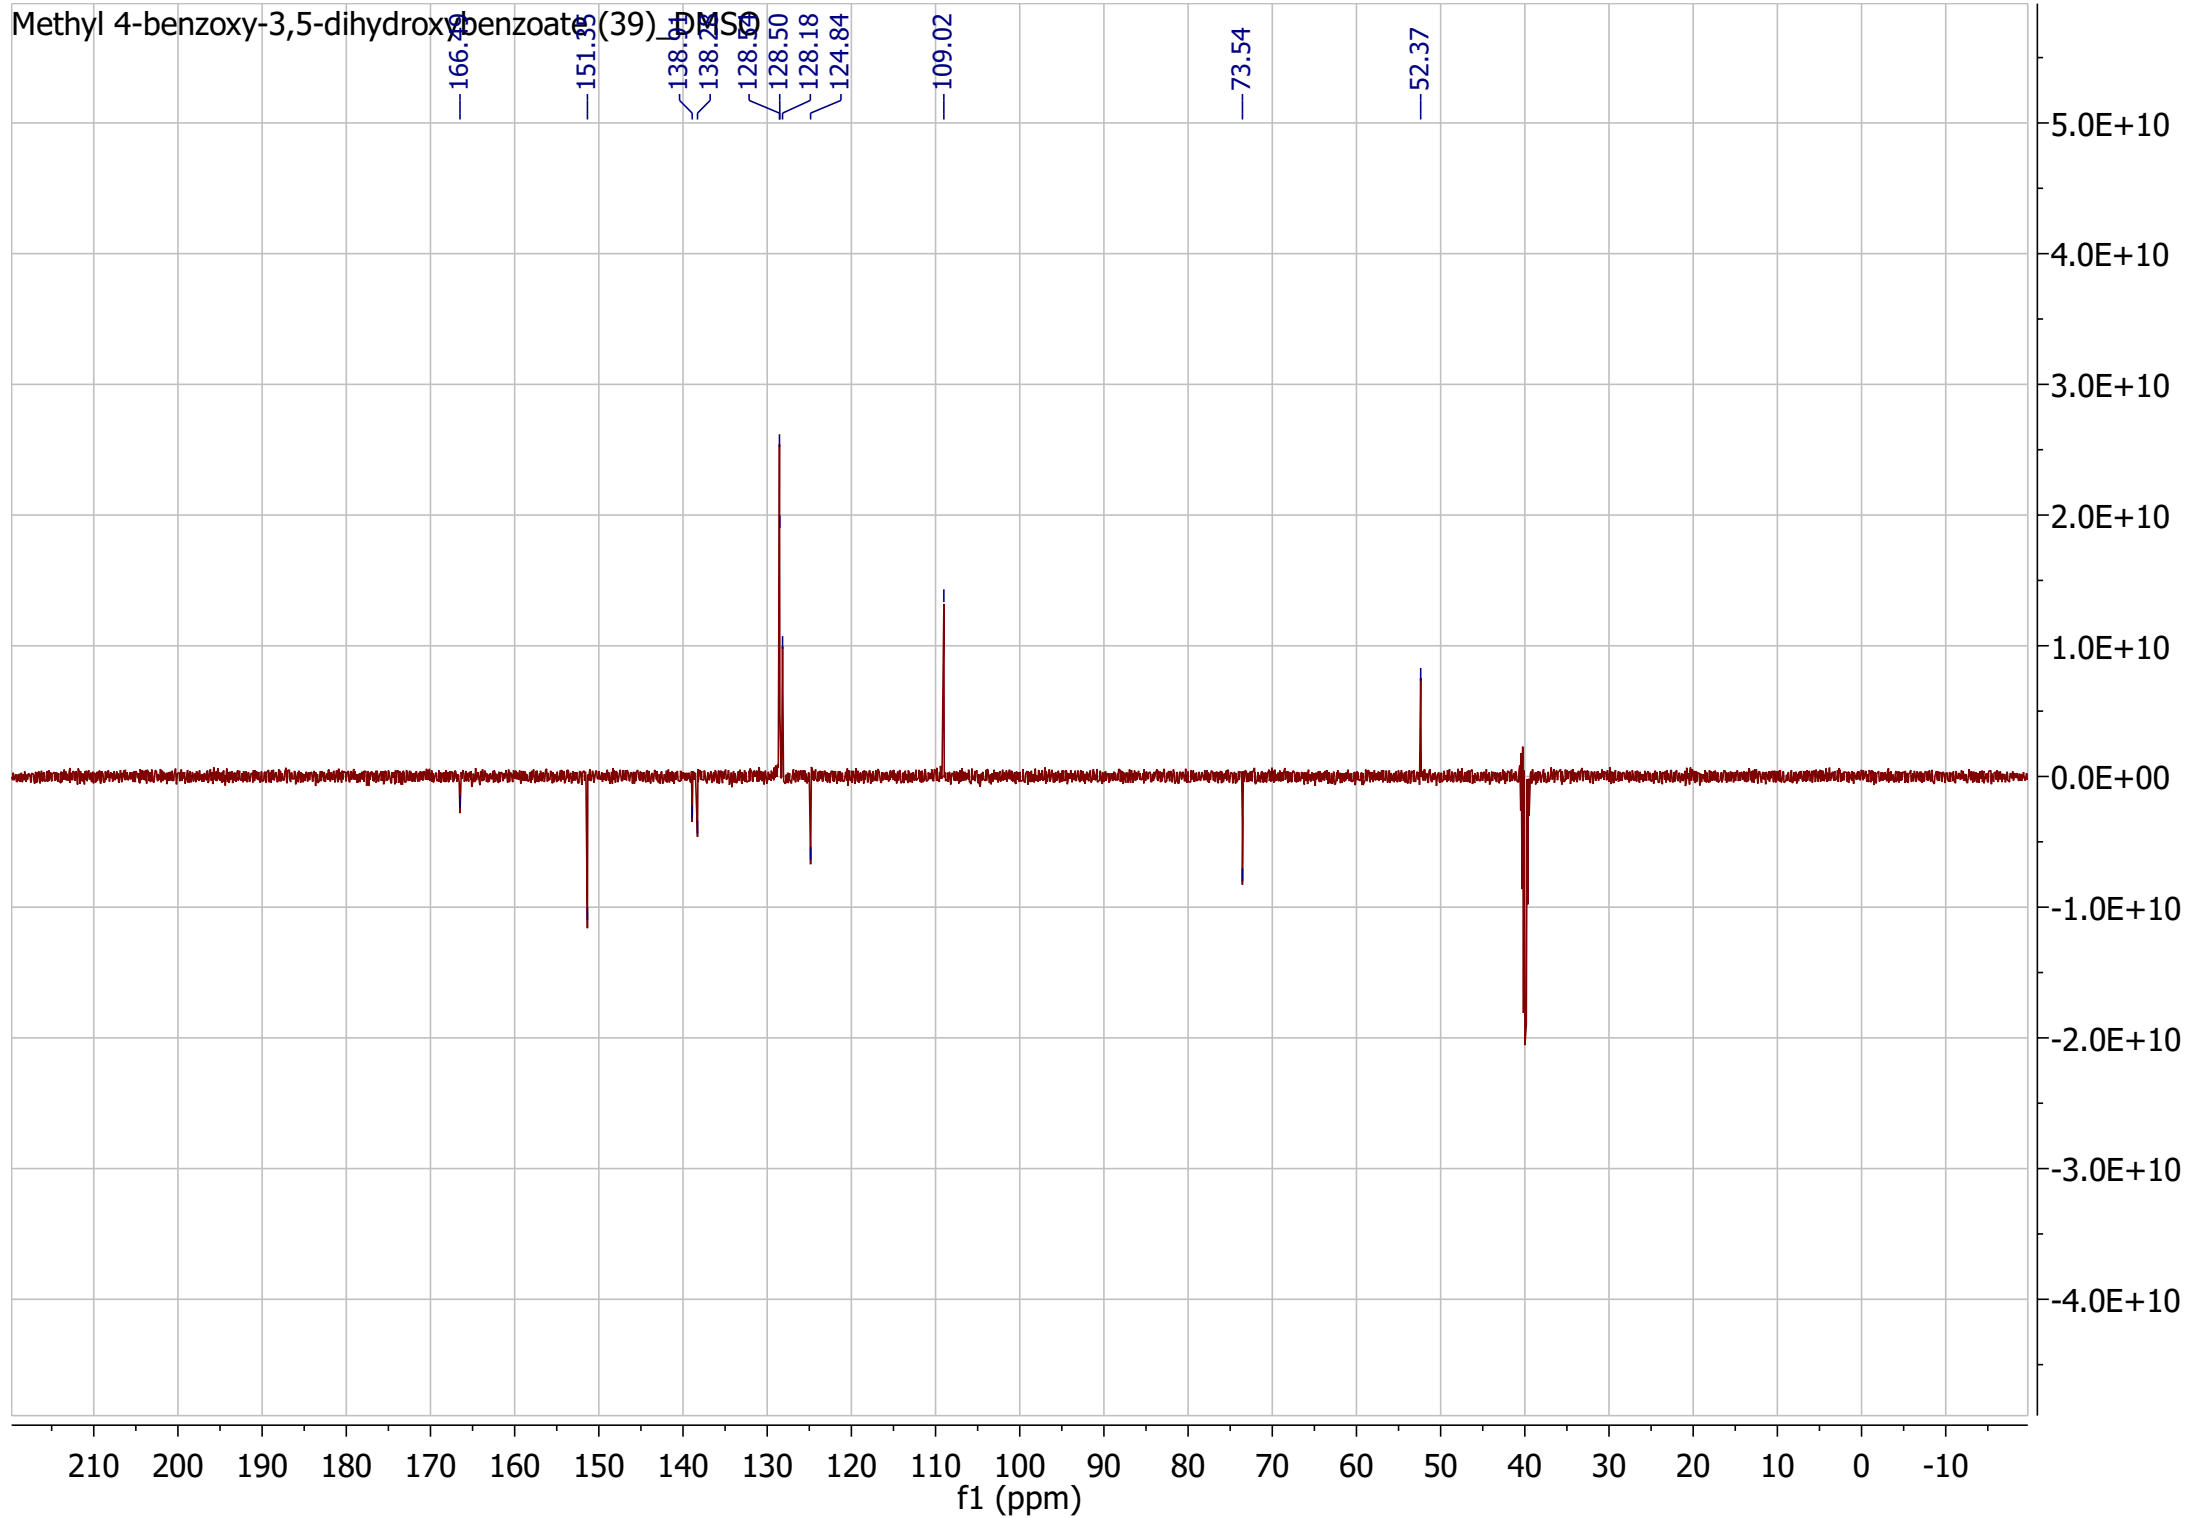

Methyl 4-(4-methoxybenzoxy)-3,5-dihydroxybenzoate\_DMSO

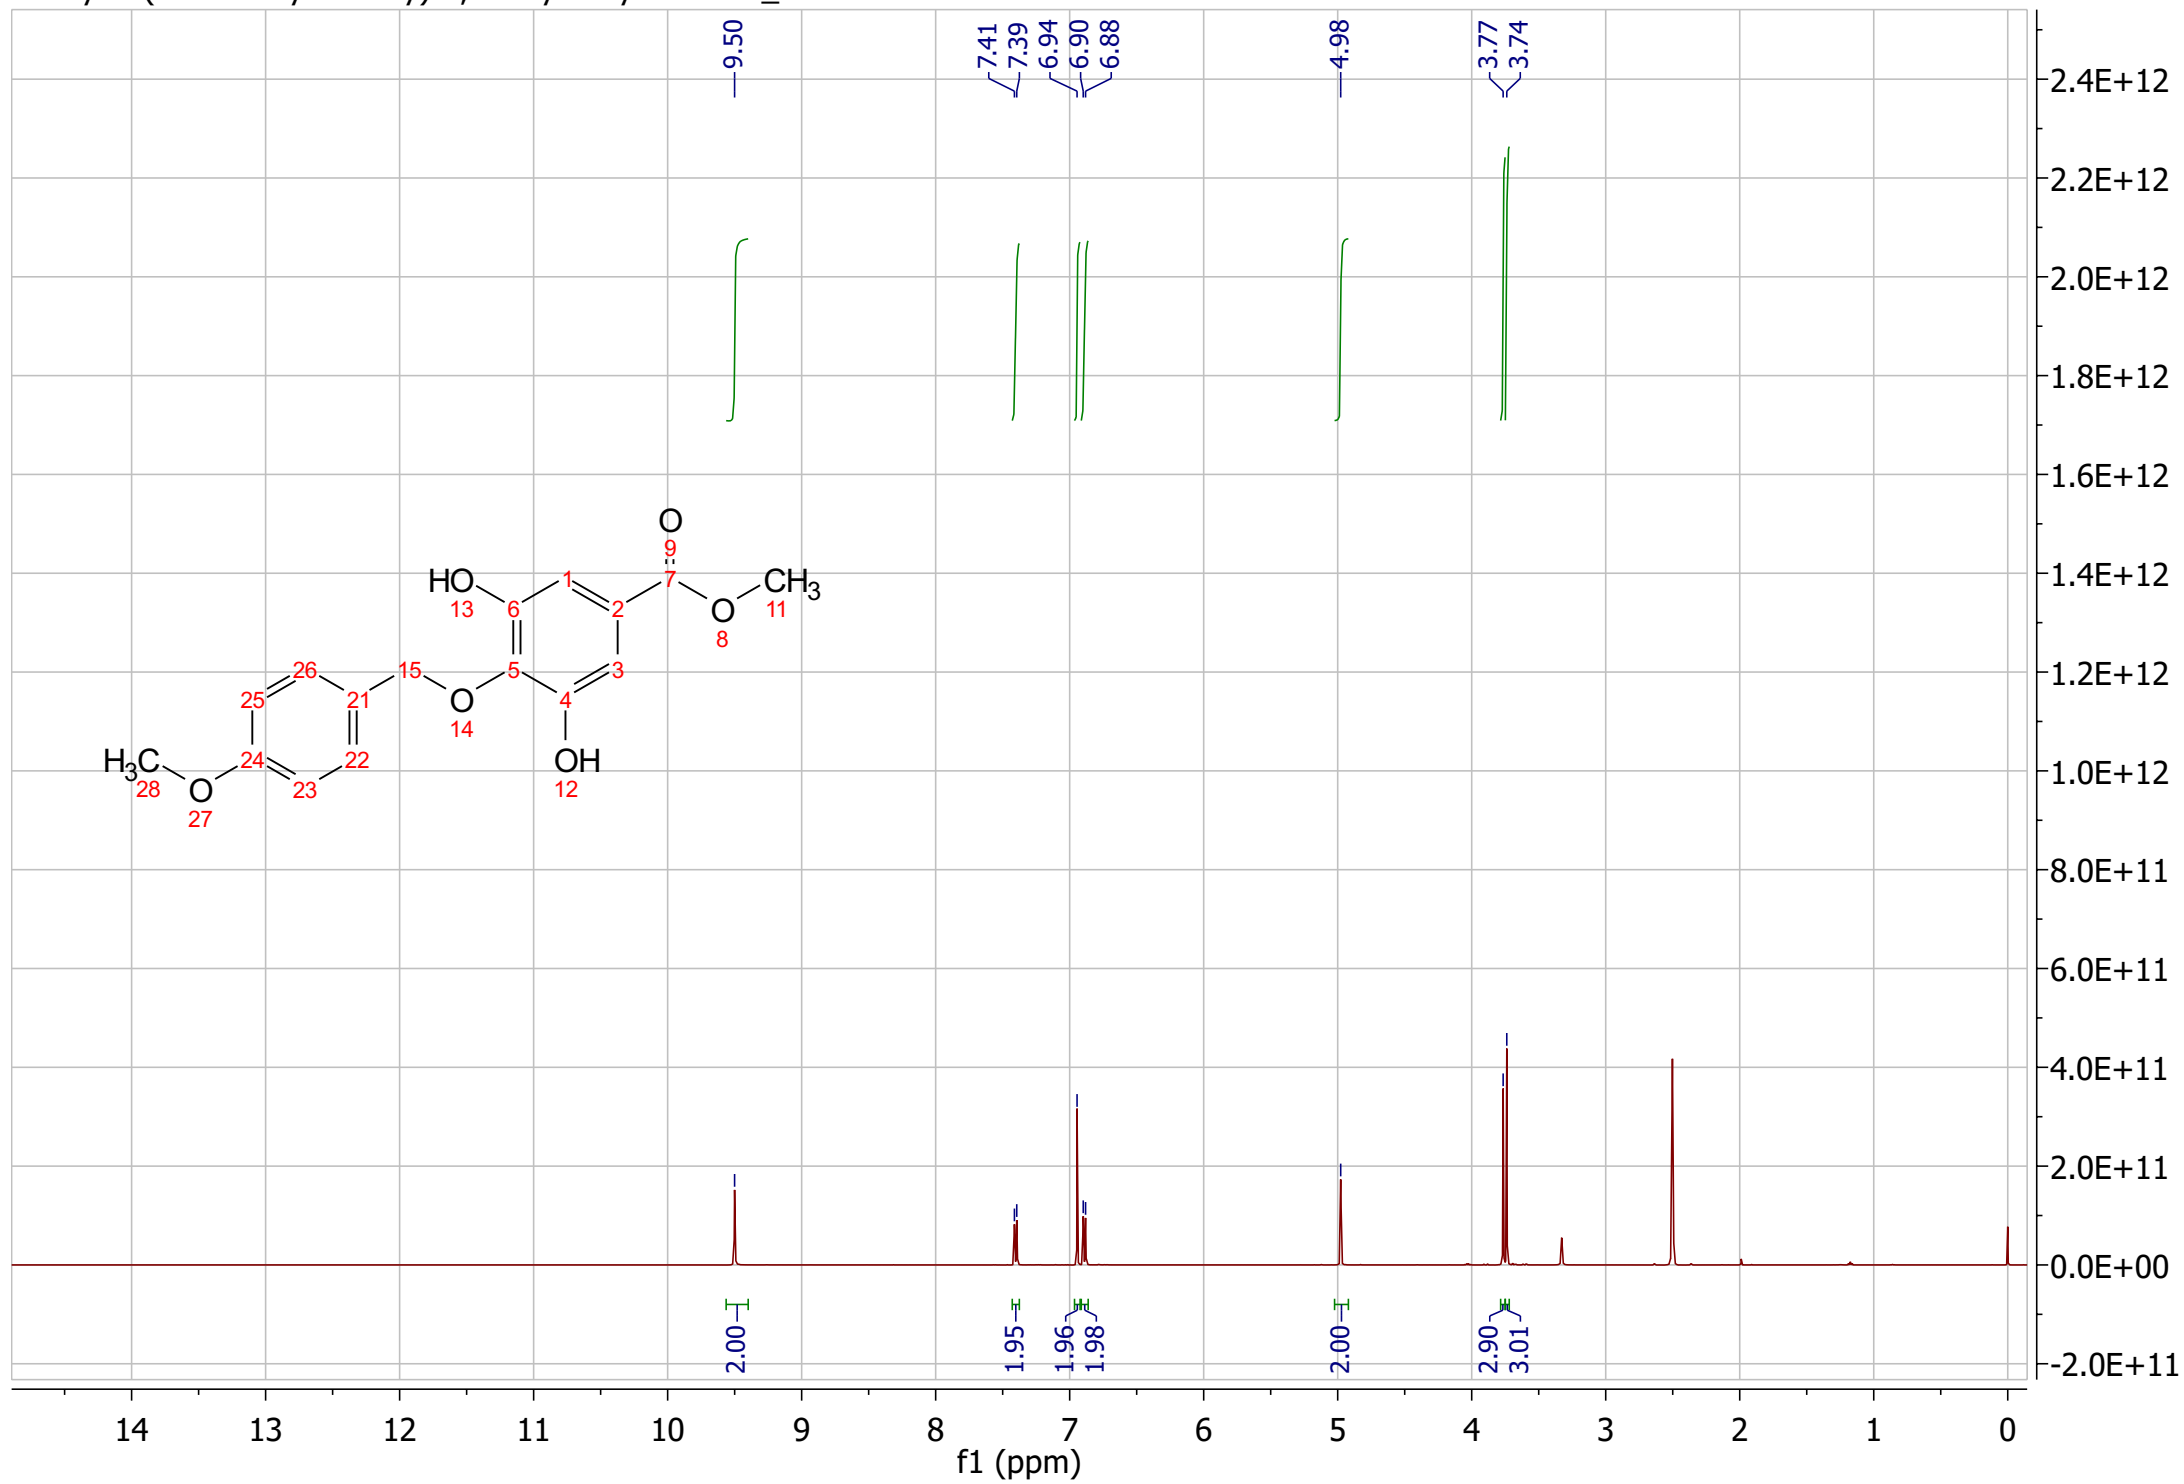

Methyl 4-(4-methoxybenzoxy)-3,5-dihydroxybenzoate\_DMSO

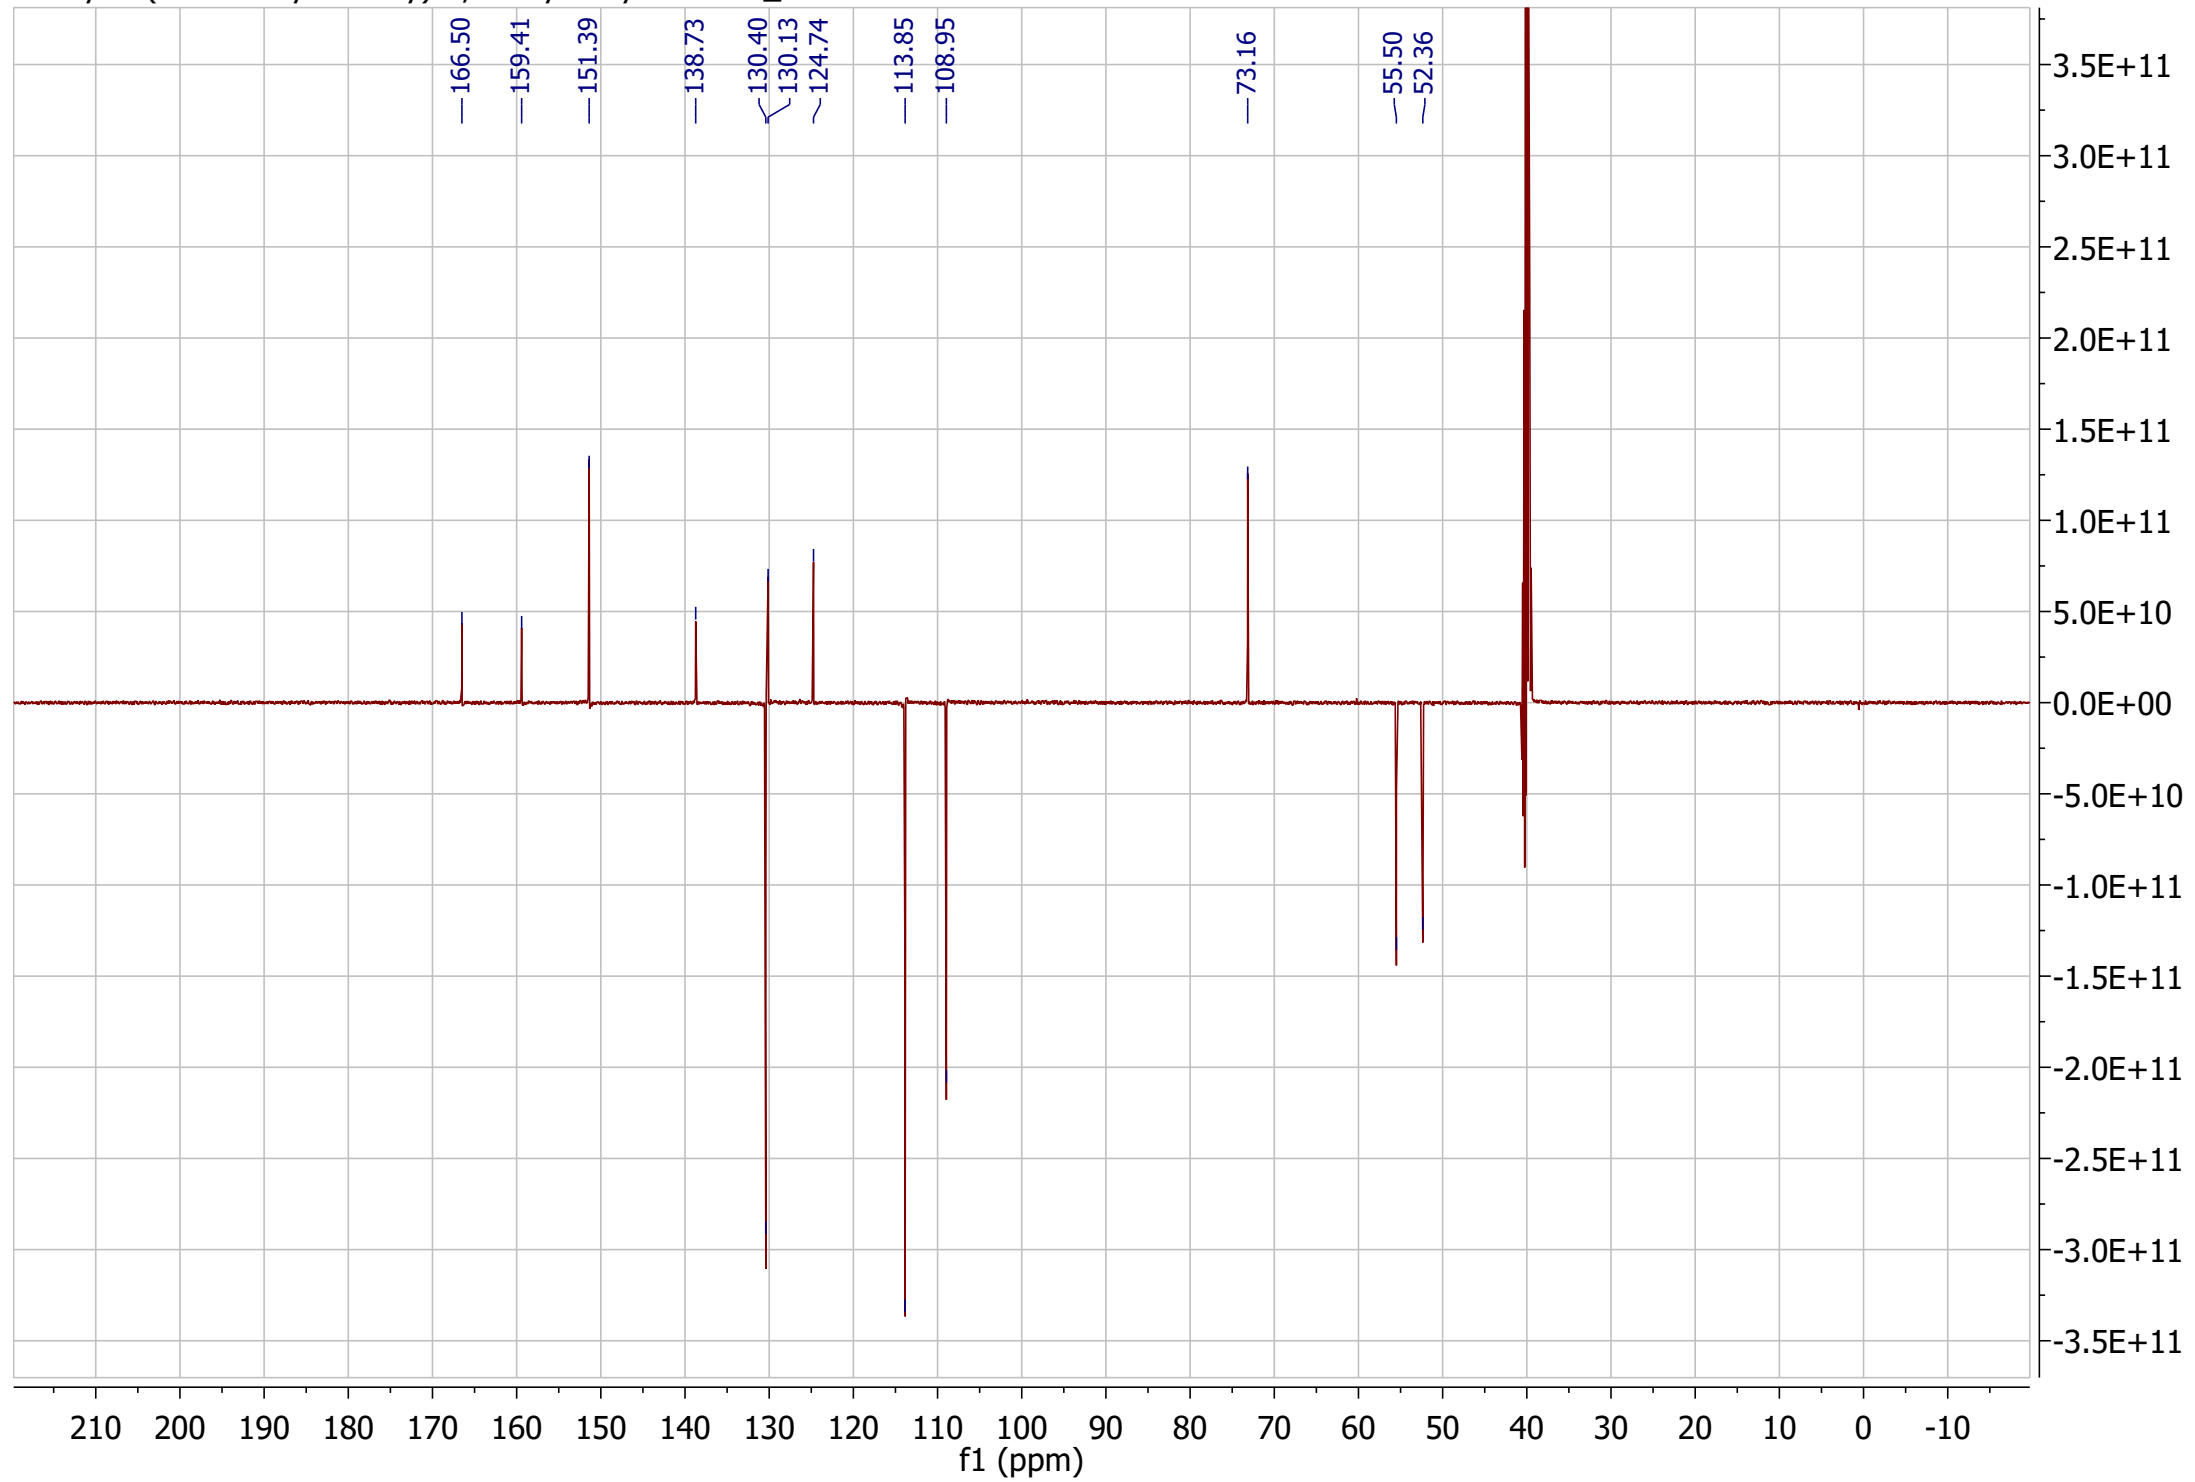

Methyl 4-(2-morpholinoethoxy)-3,5-dihydroxybenzoate\_MeOD

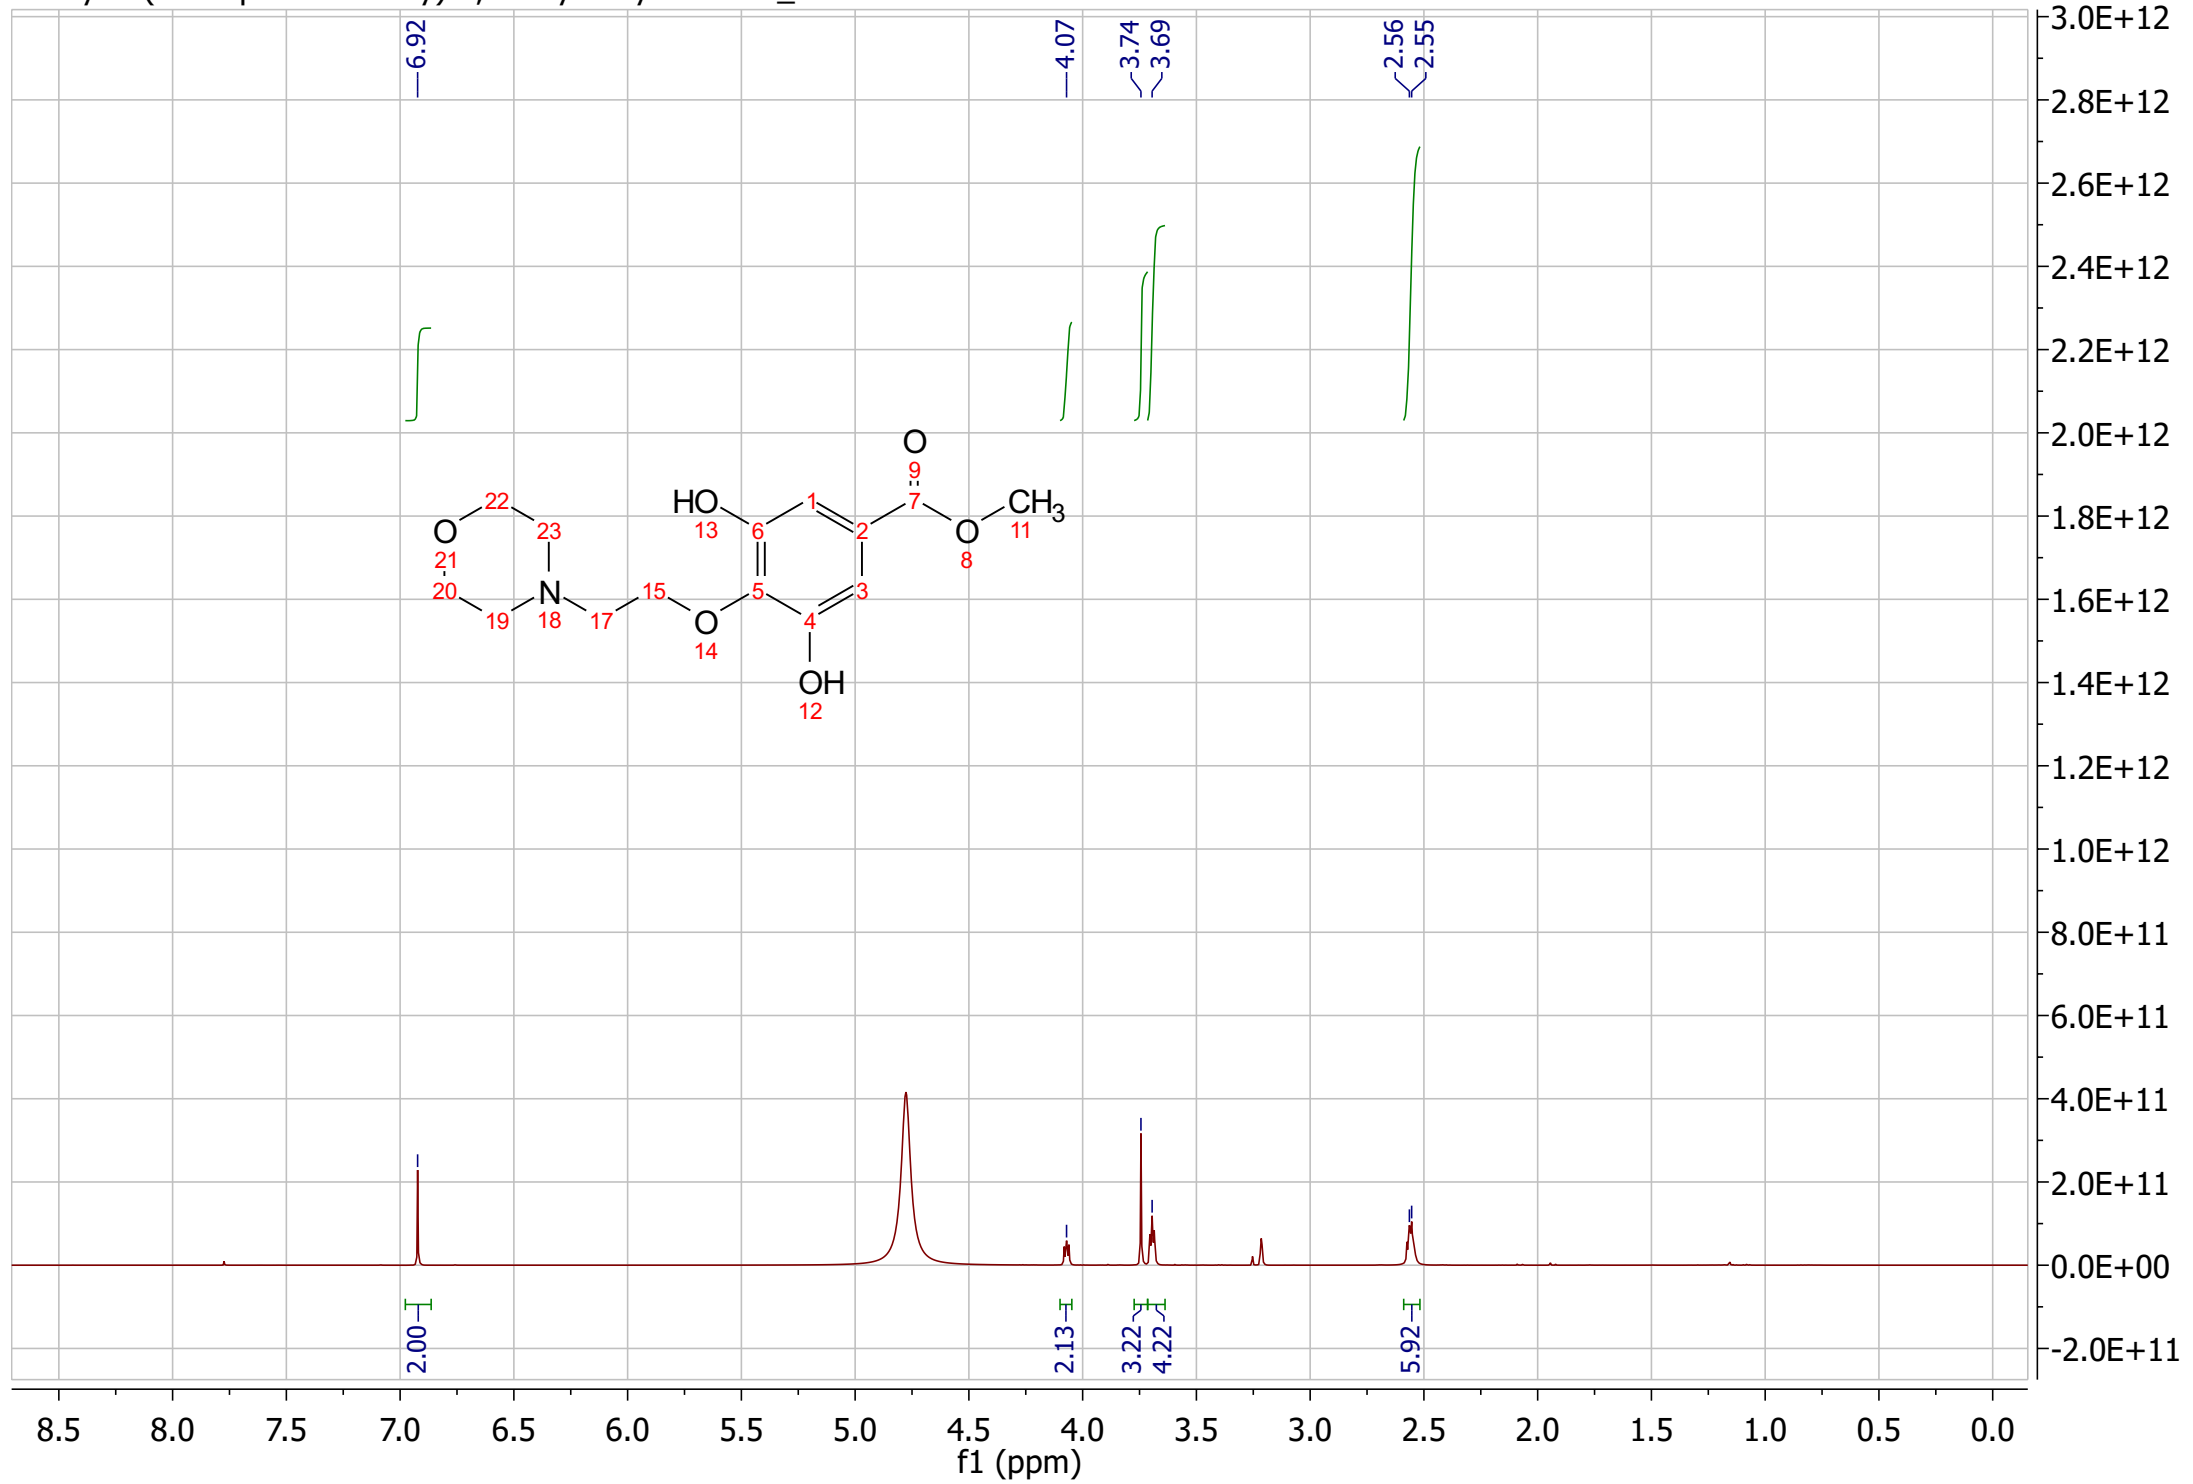

Methyl 4-(2-morpholinoethoxy)-3,5-dihydroxybenzoate\_MeOD

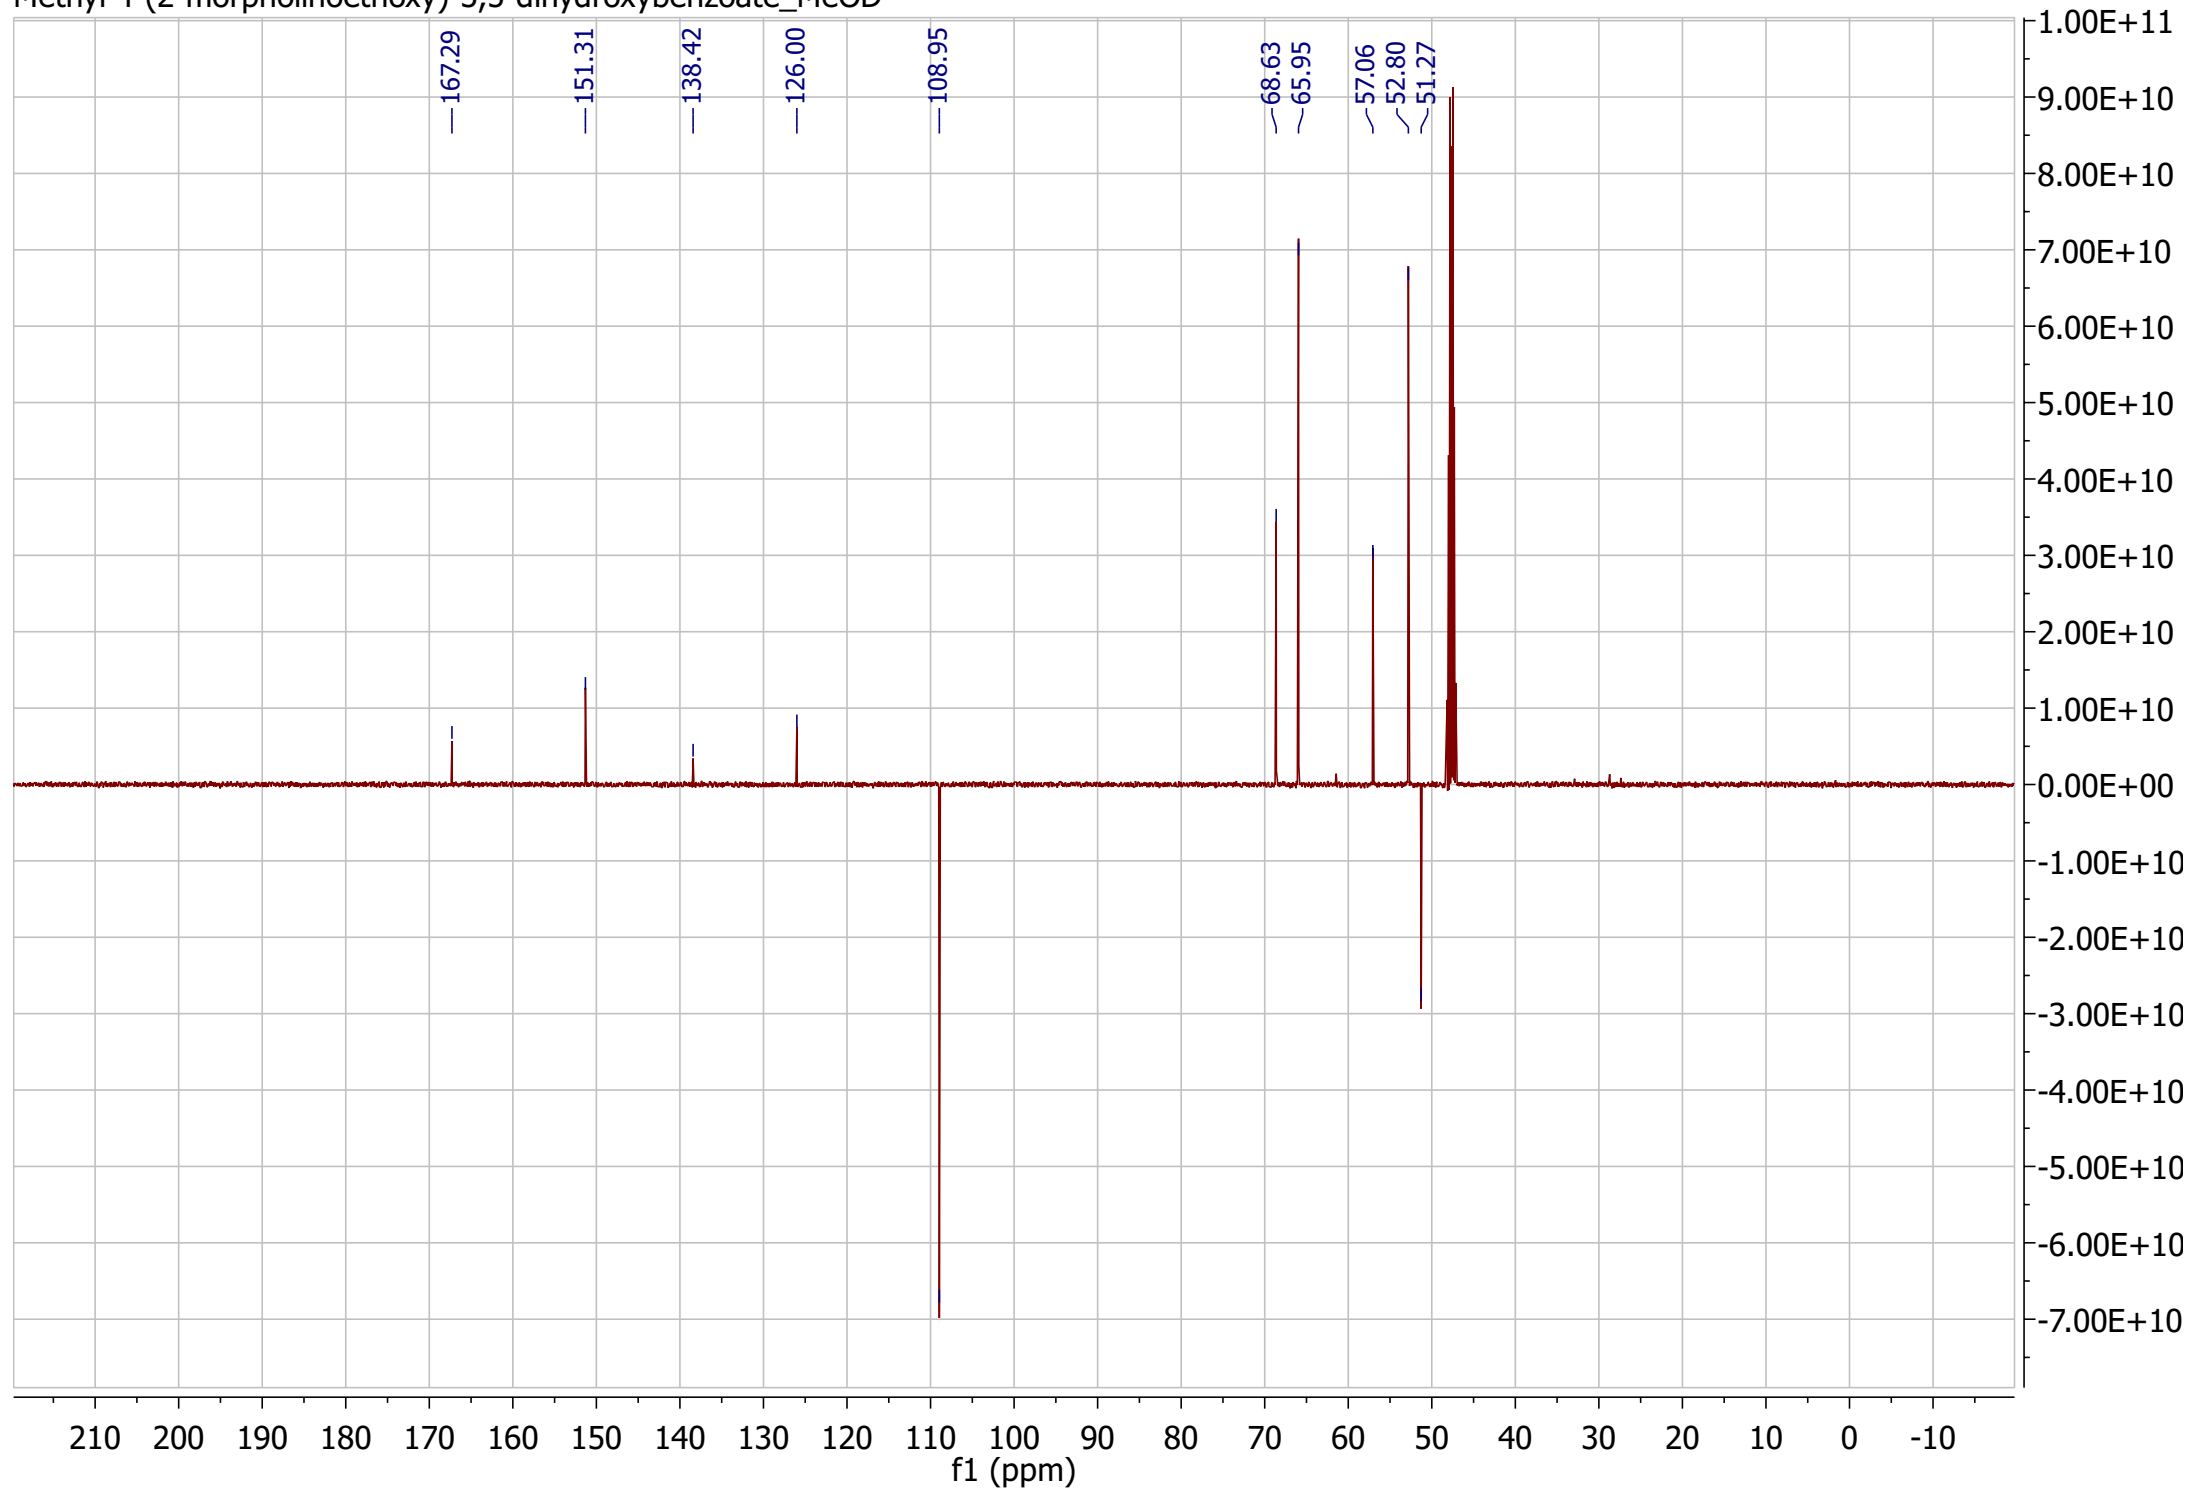

Methyl 4-(benzyloxy)-3,5-bis(methoxymethoxy)benzoate\_CDCl3

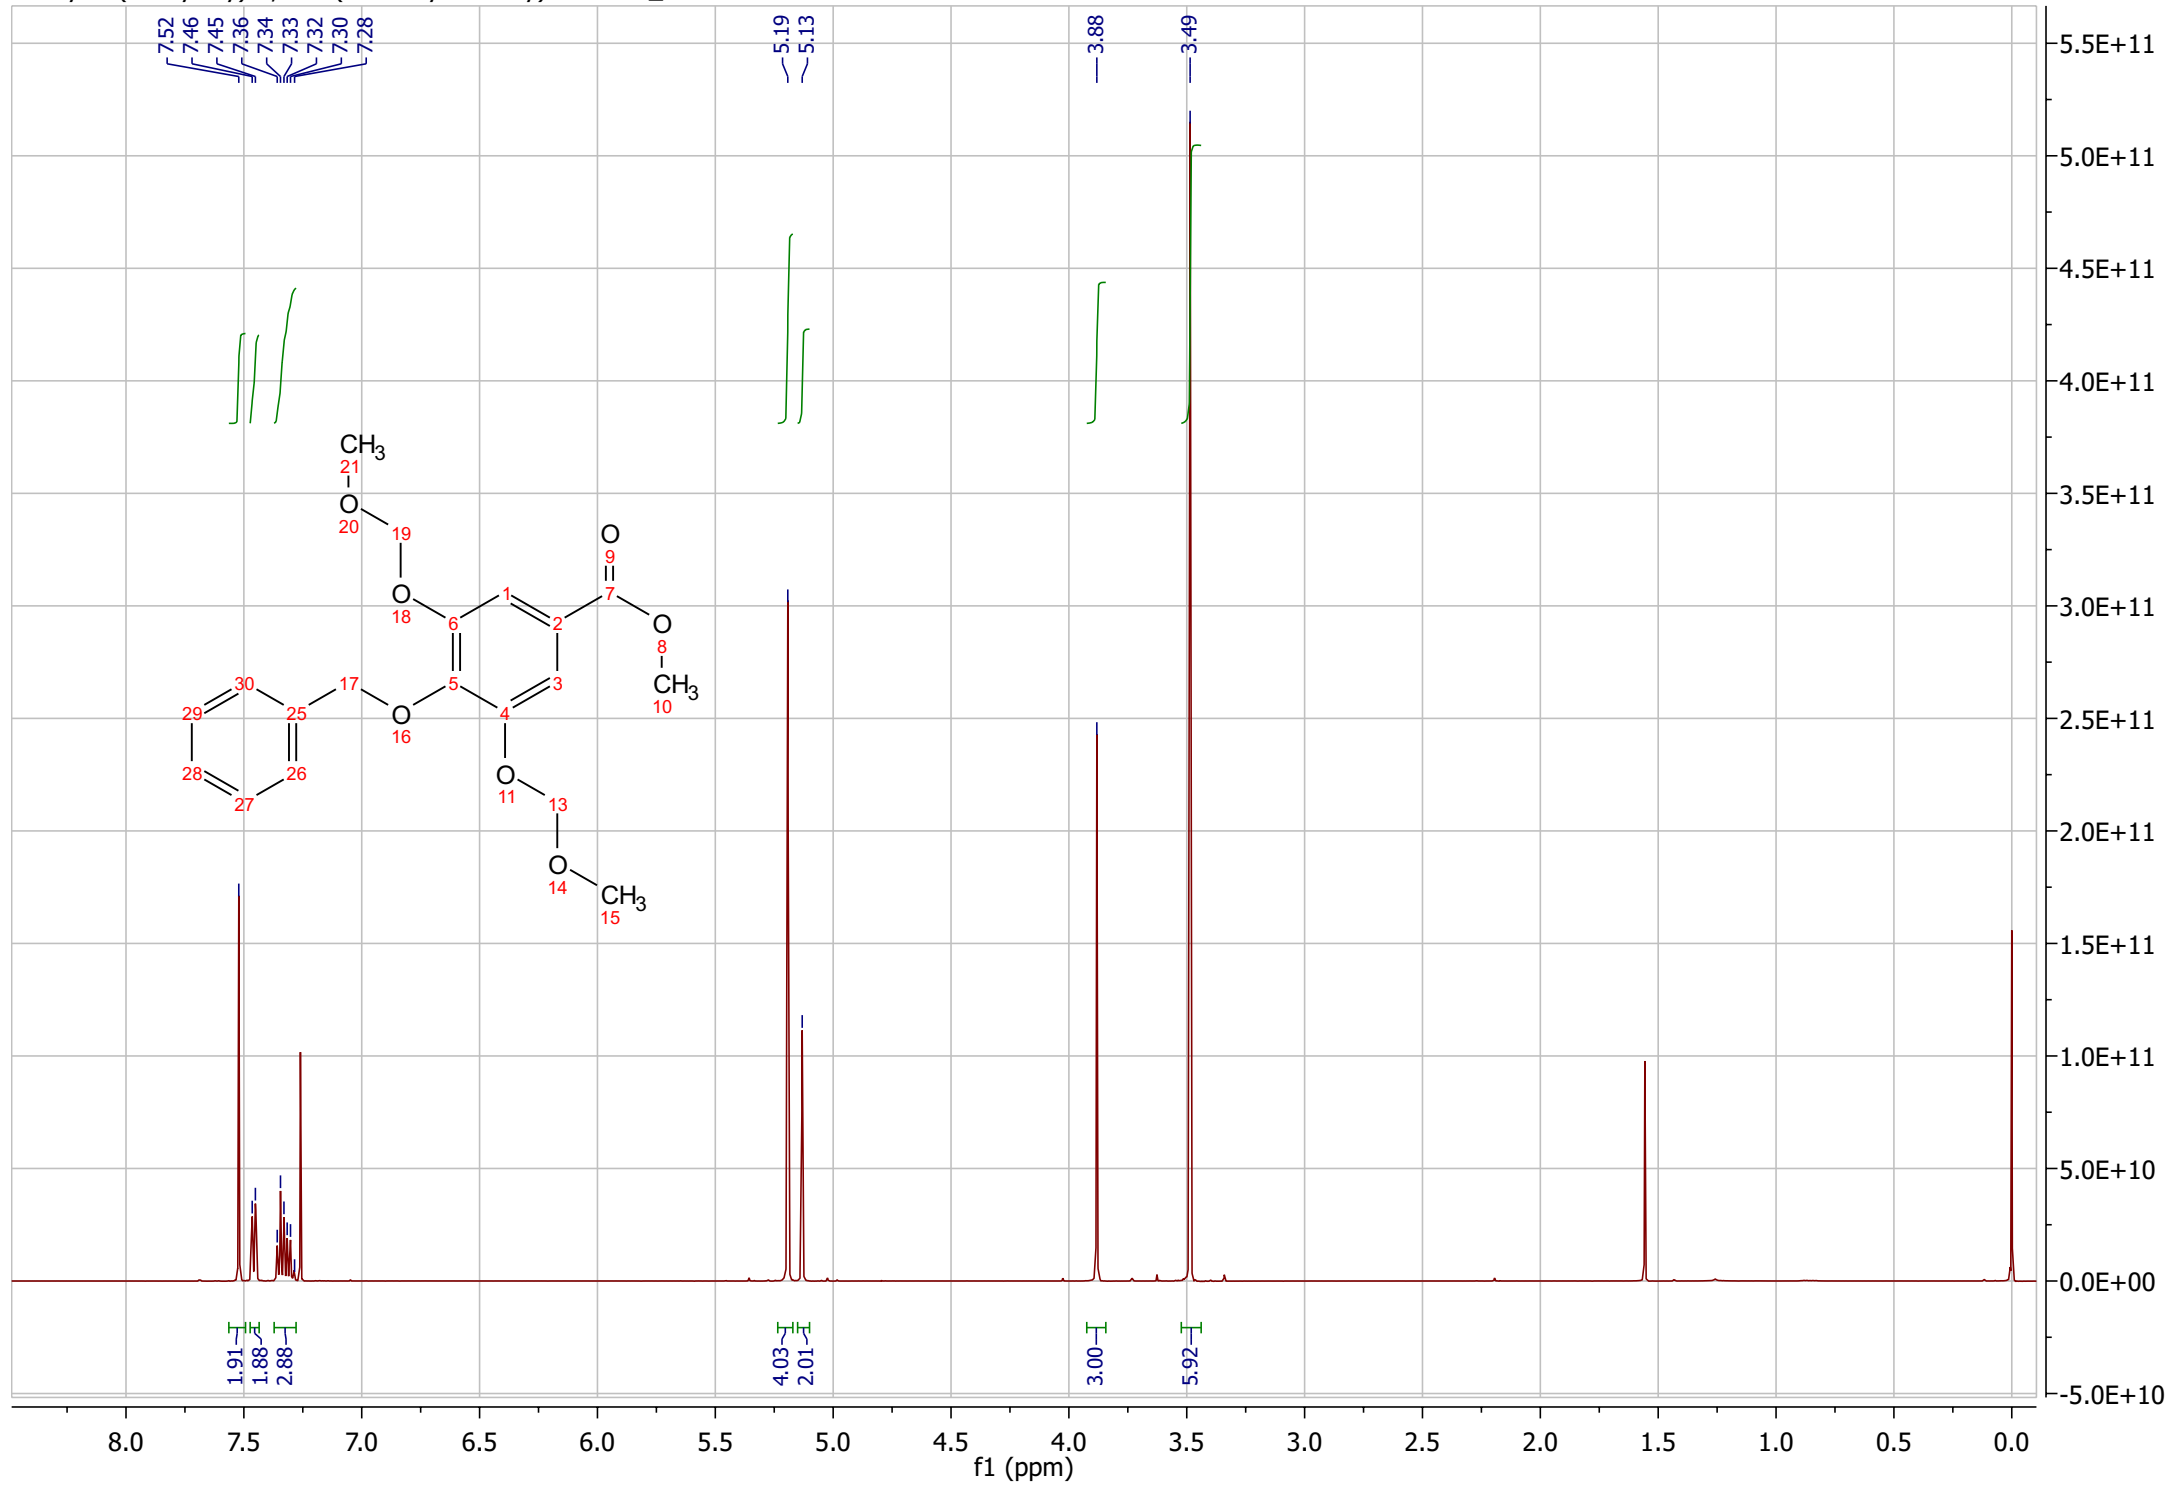

Methyl 4-(benzyloxy)-3,5-bis(methoxymethoxy)benzoate\_CDCl3

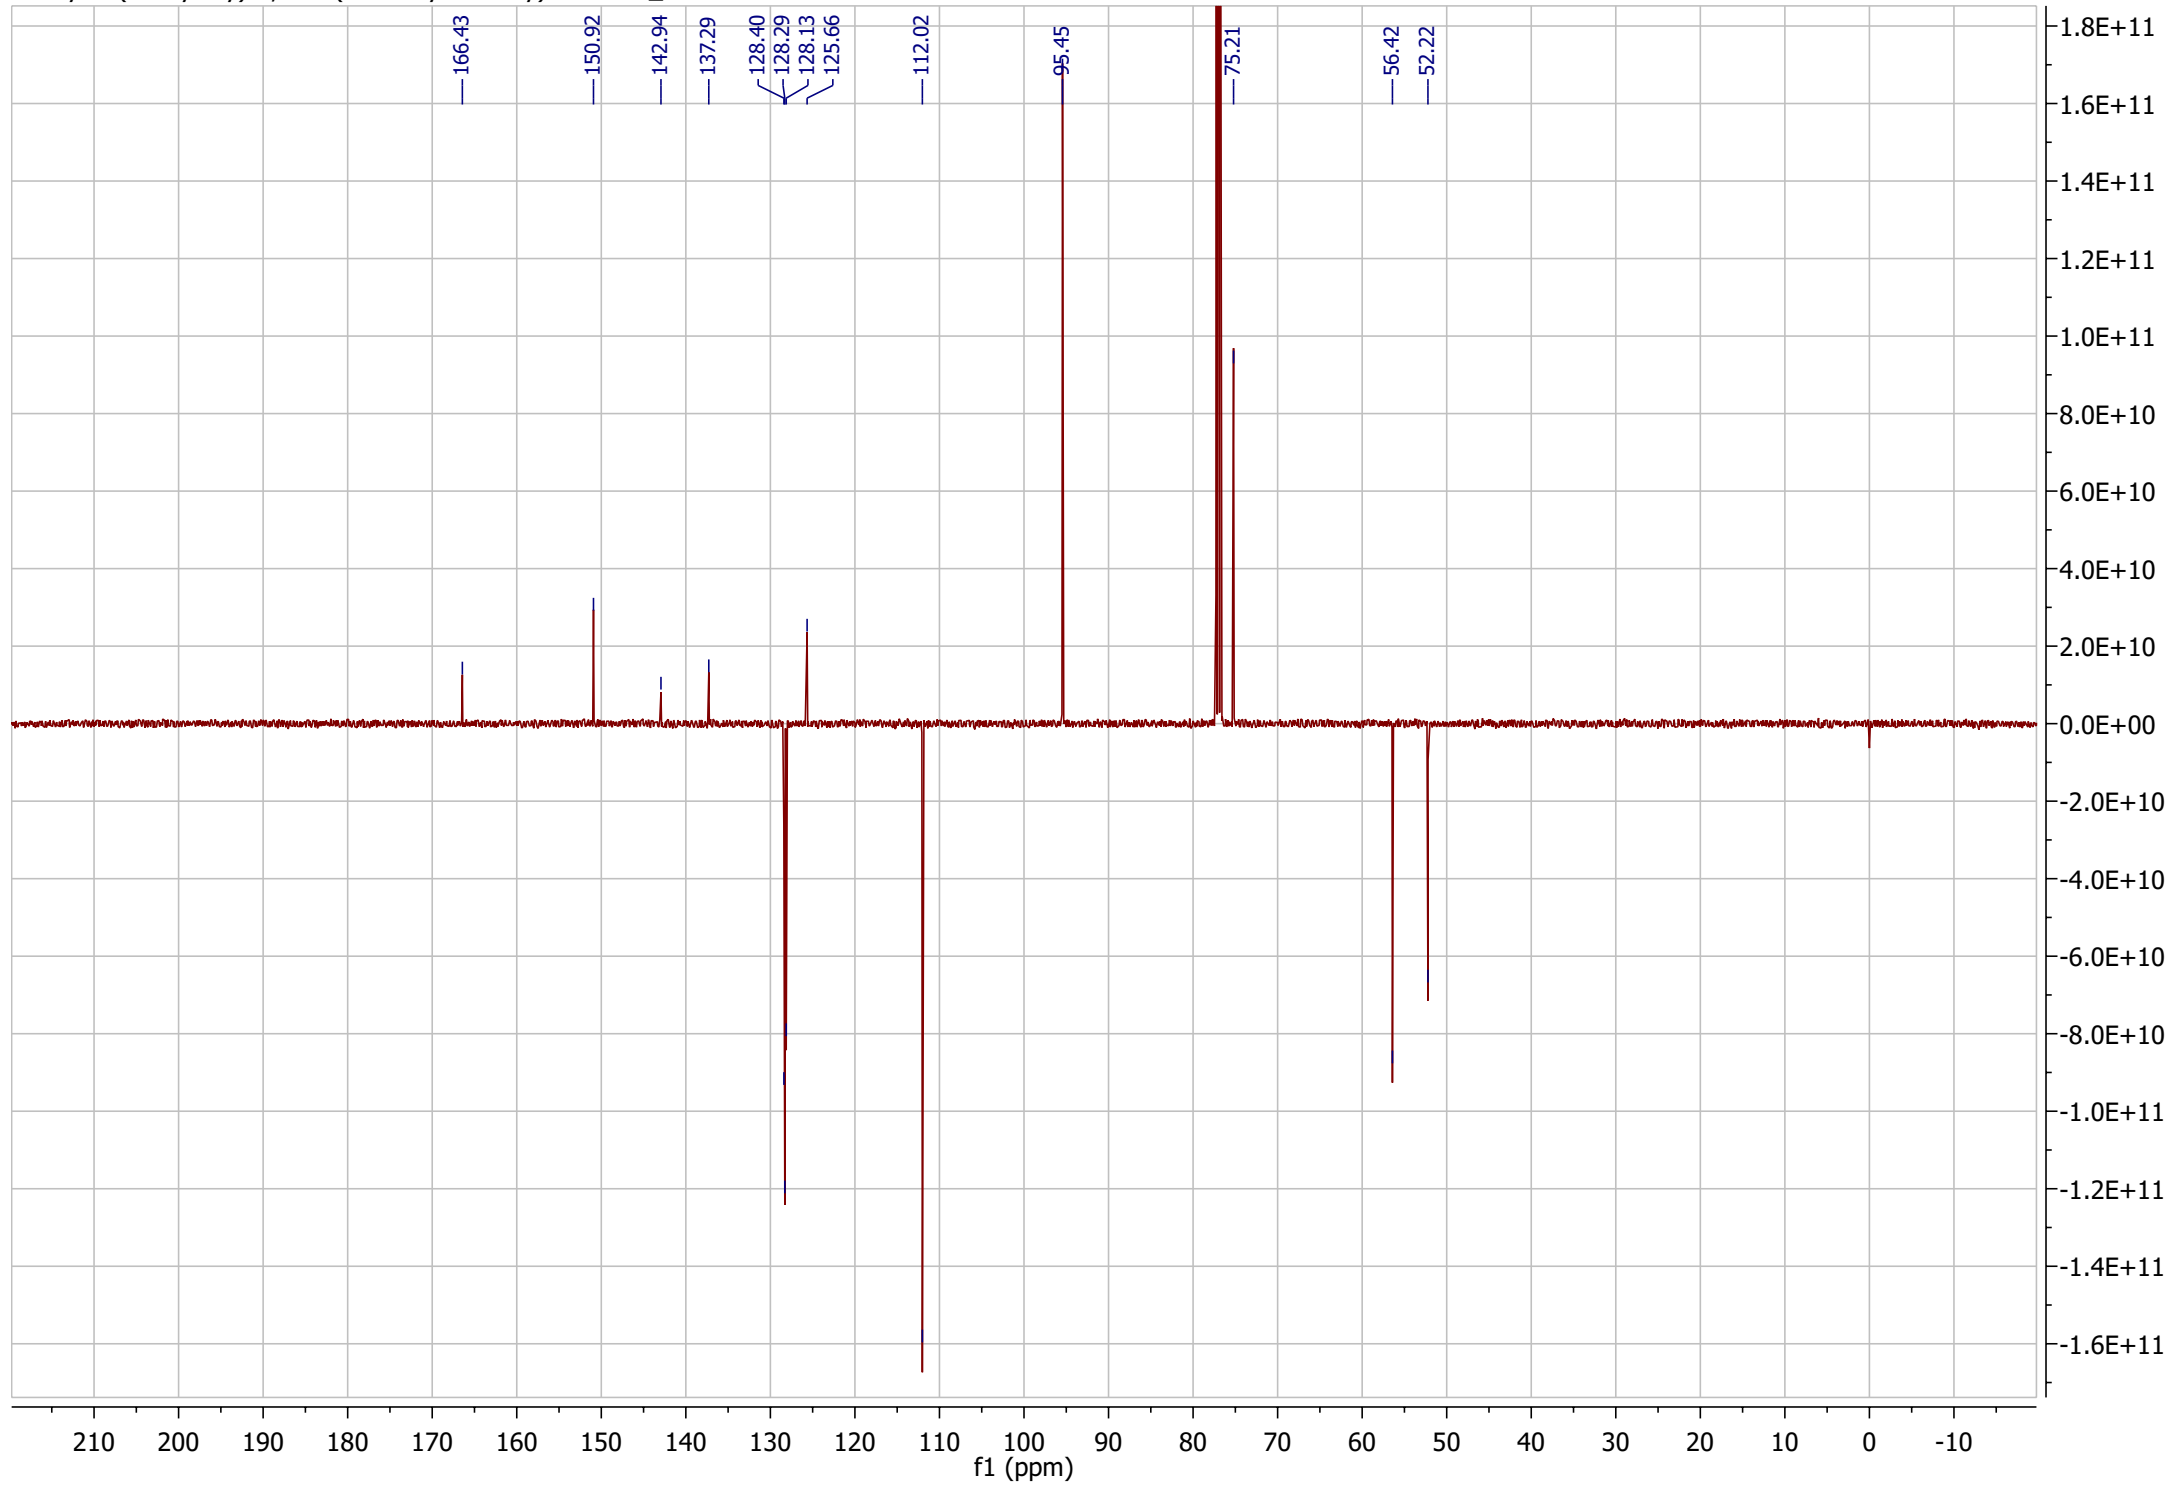



Methyl 3,5-bis(methoxymethoxy)-4-(naphth-2-ylmethoxy)benzoate\_DMSO

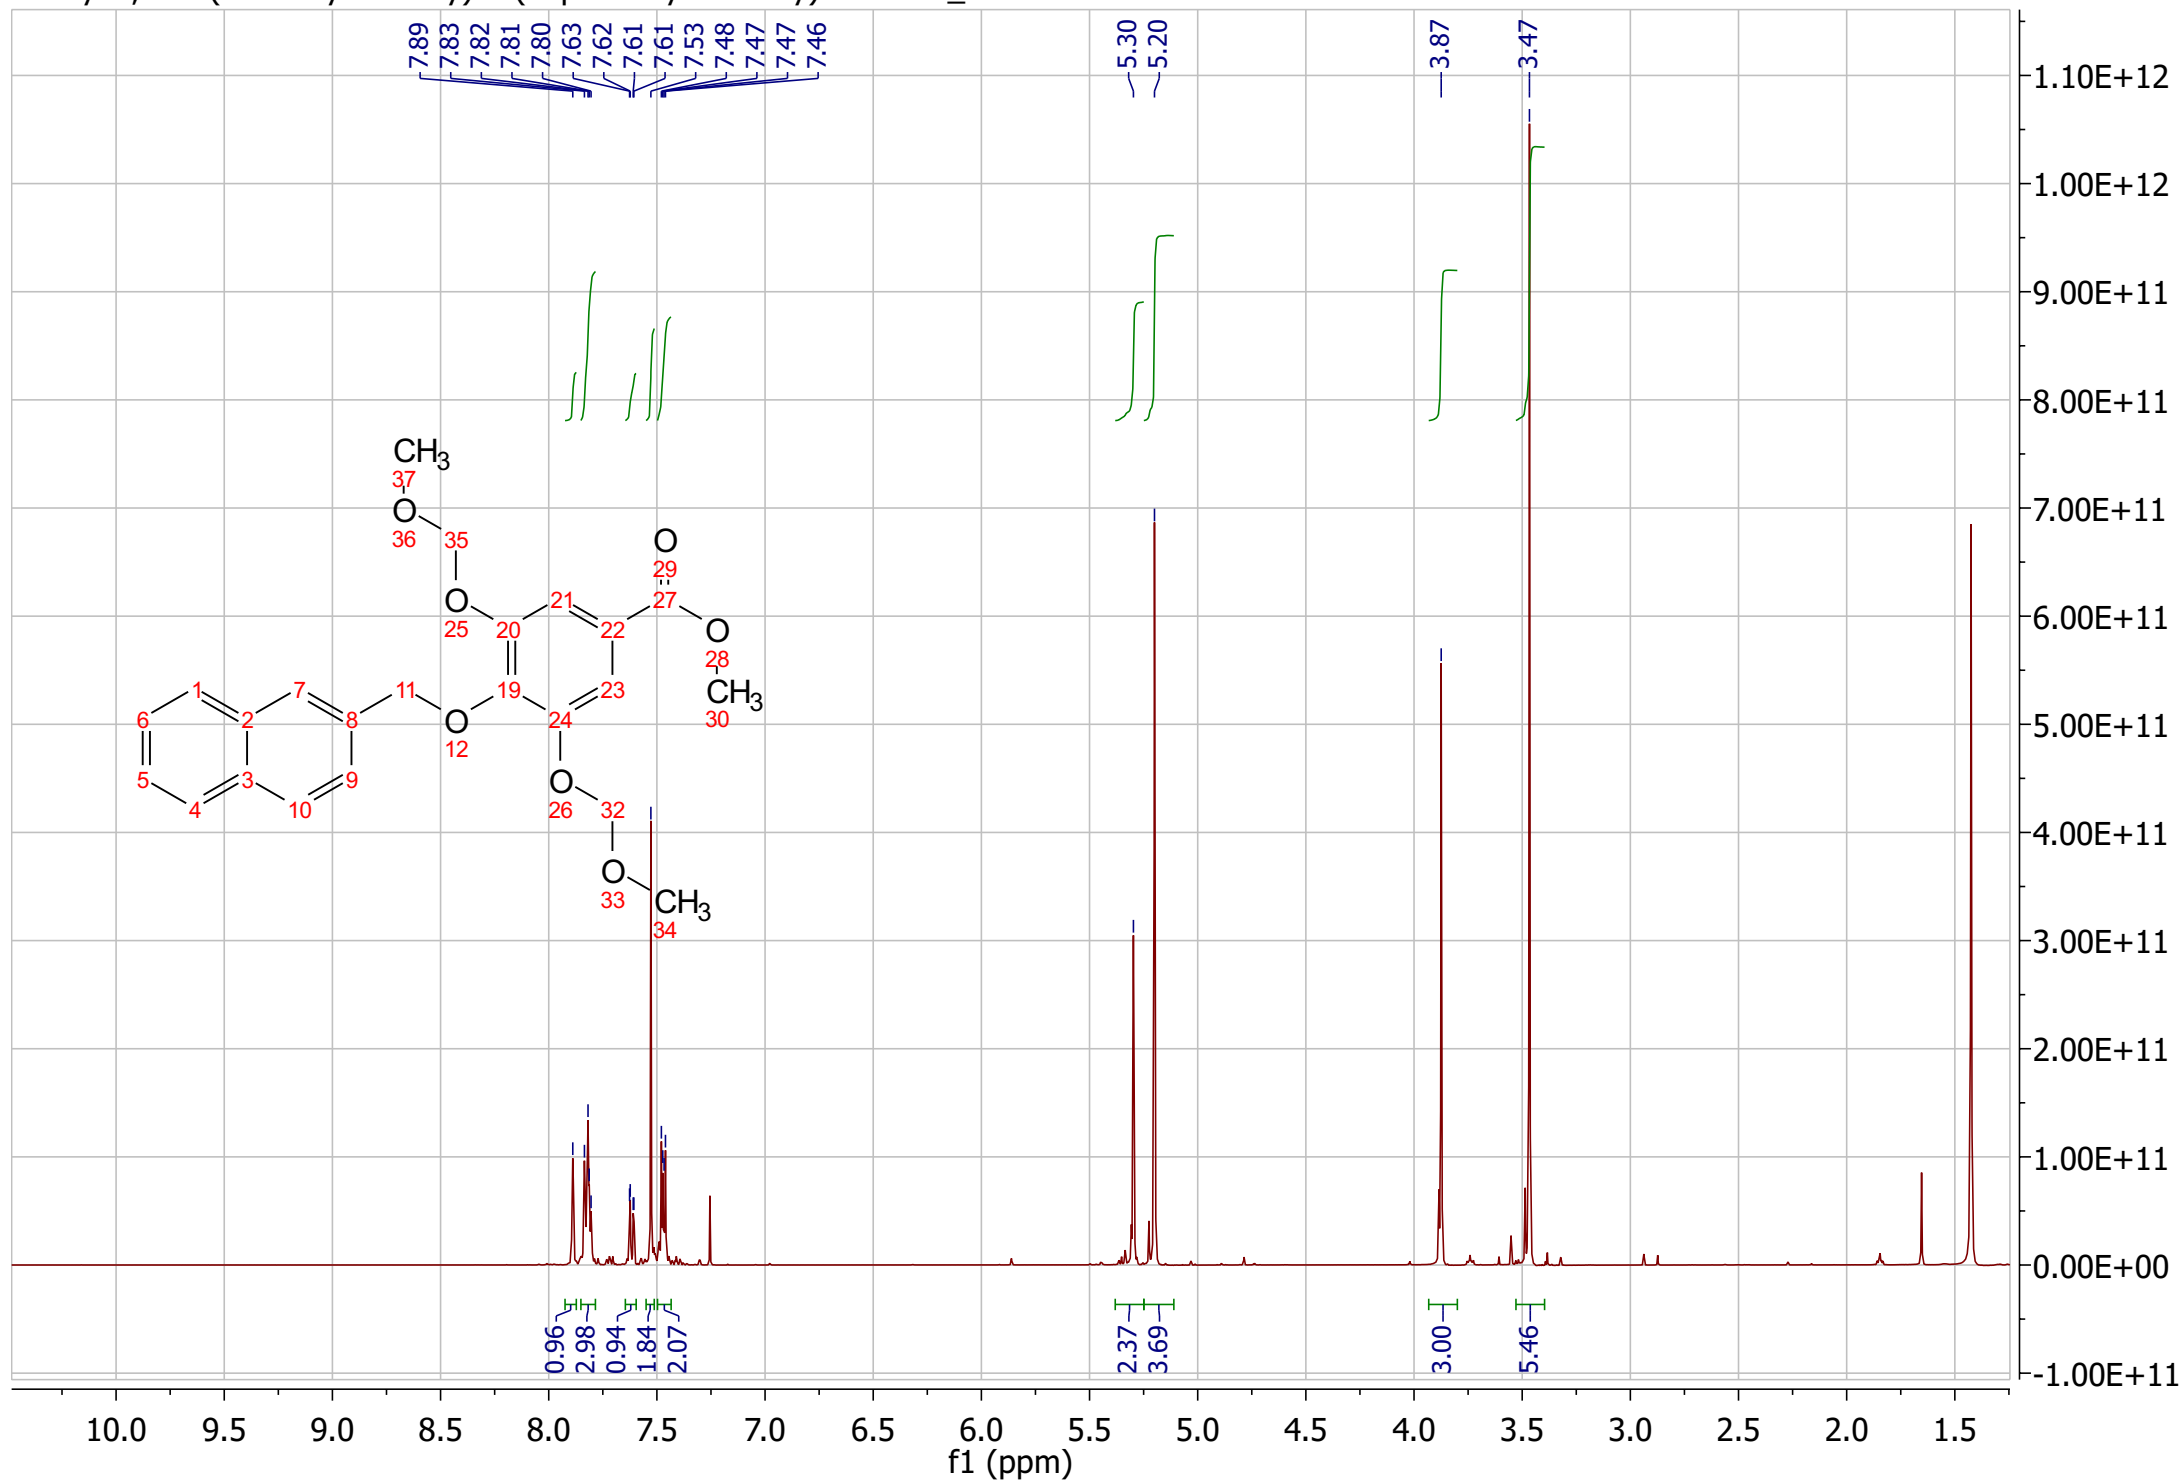

Methyl 3,5-bis(methoxymethoxy)-4-(naphth-2-ylmethoxy)benzoate\_DMSO

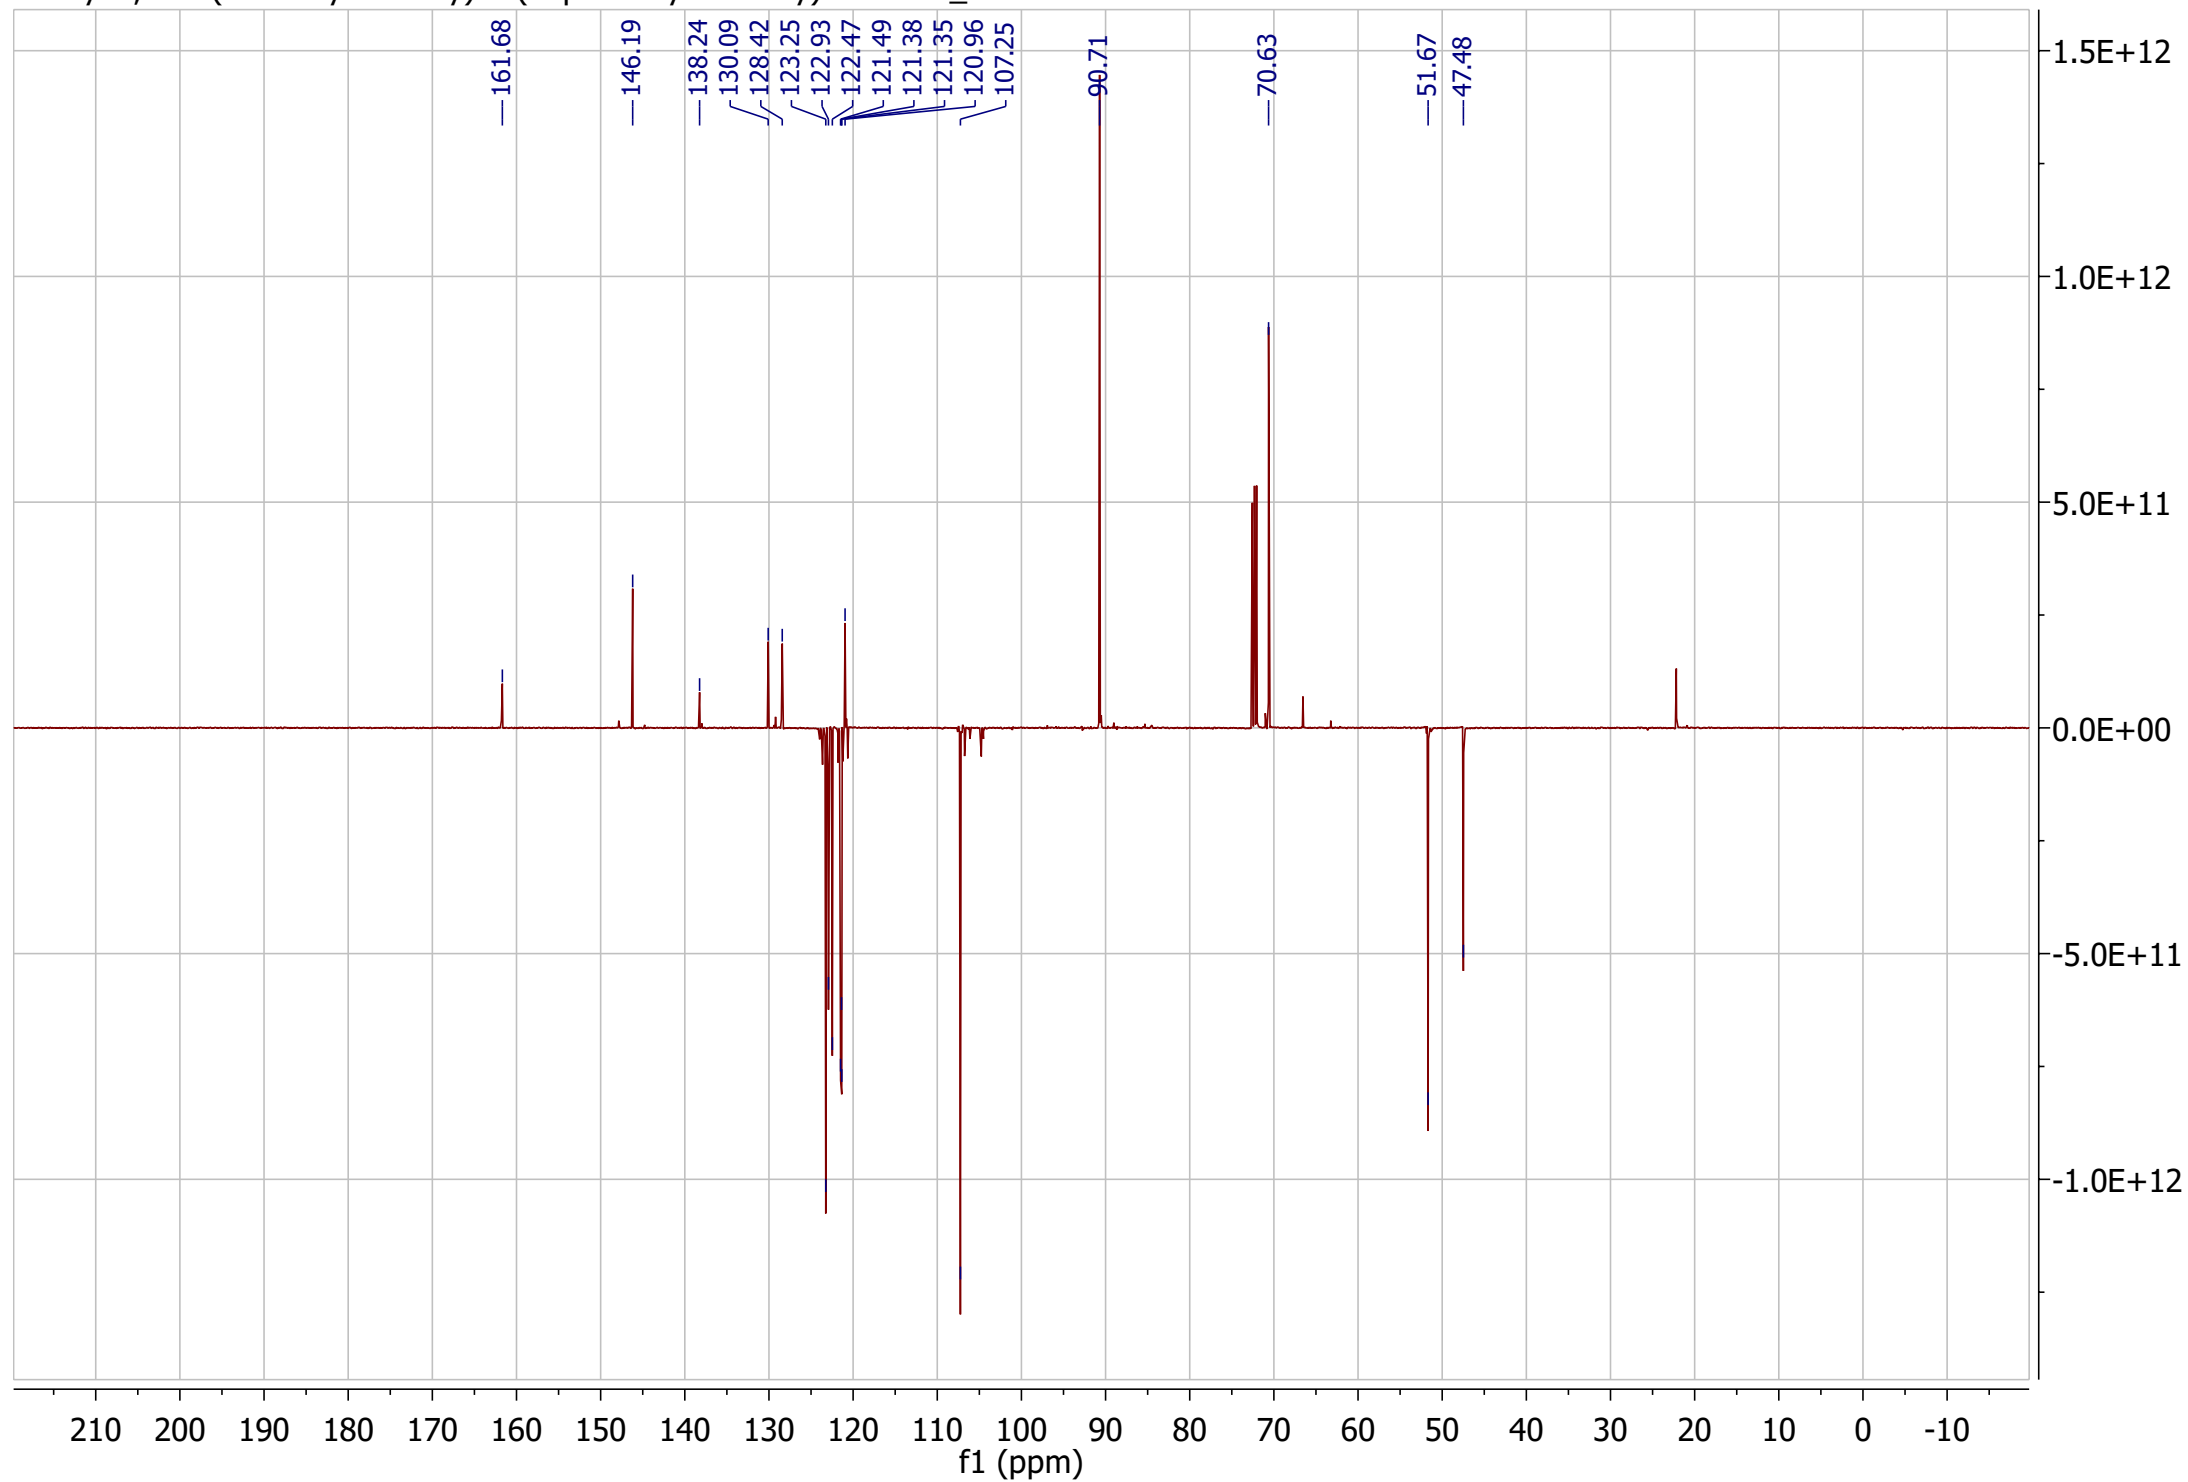

Methyl 4-((4-methoxybenzyl)oxy)-3,5-bis(methoxymethoxy)benzoate

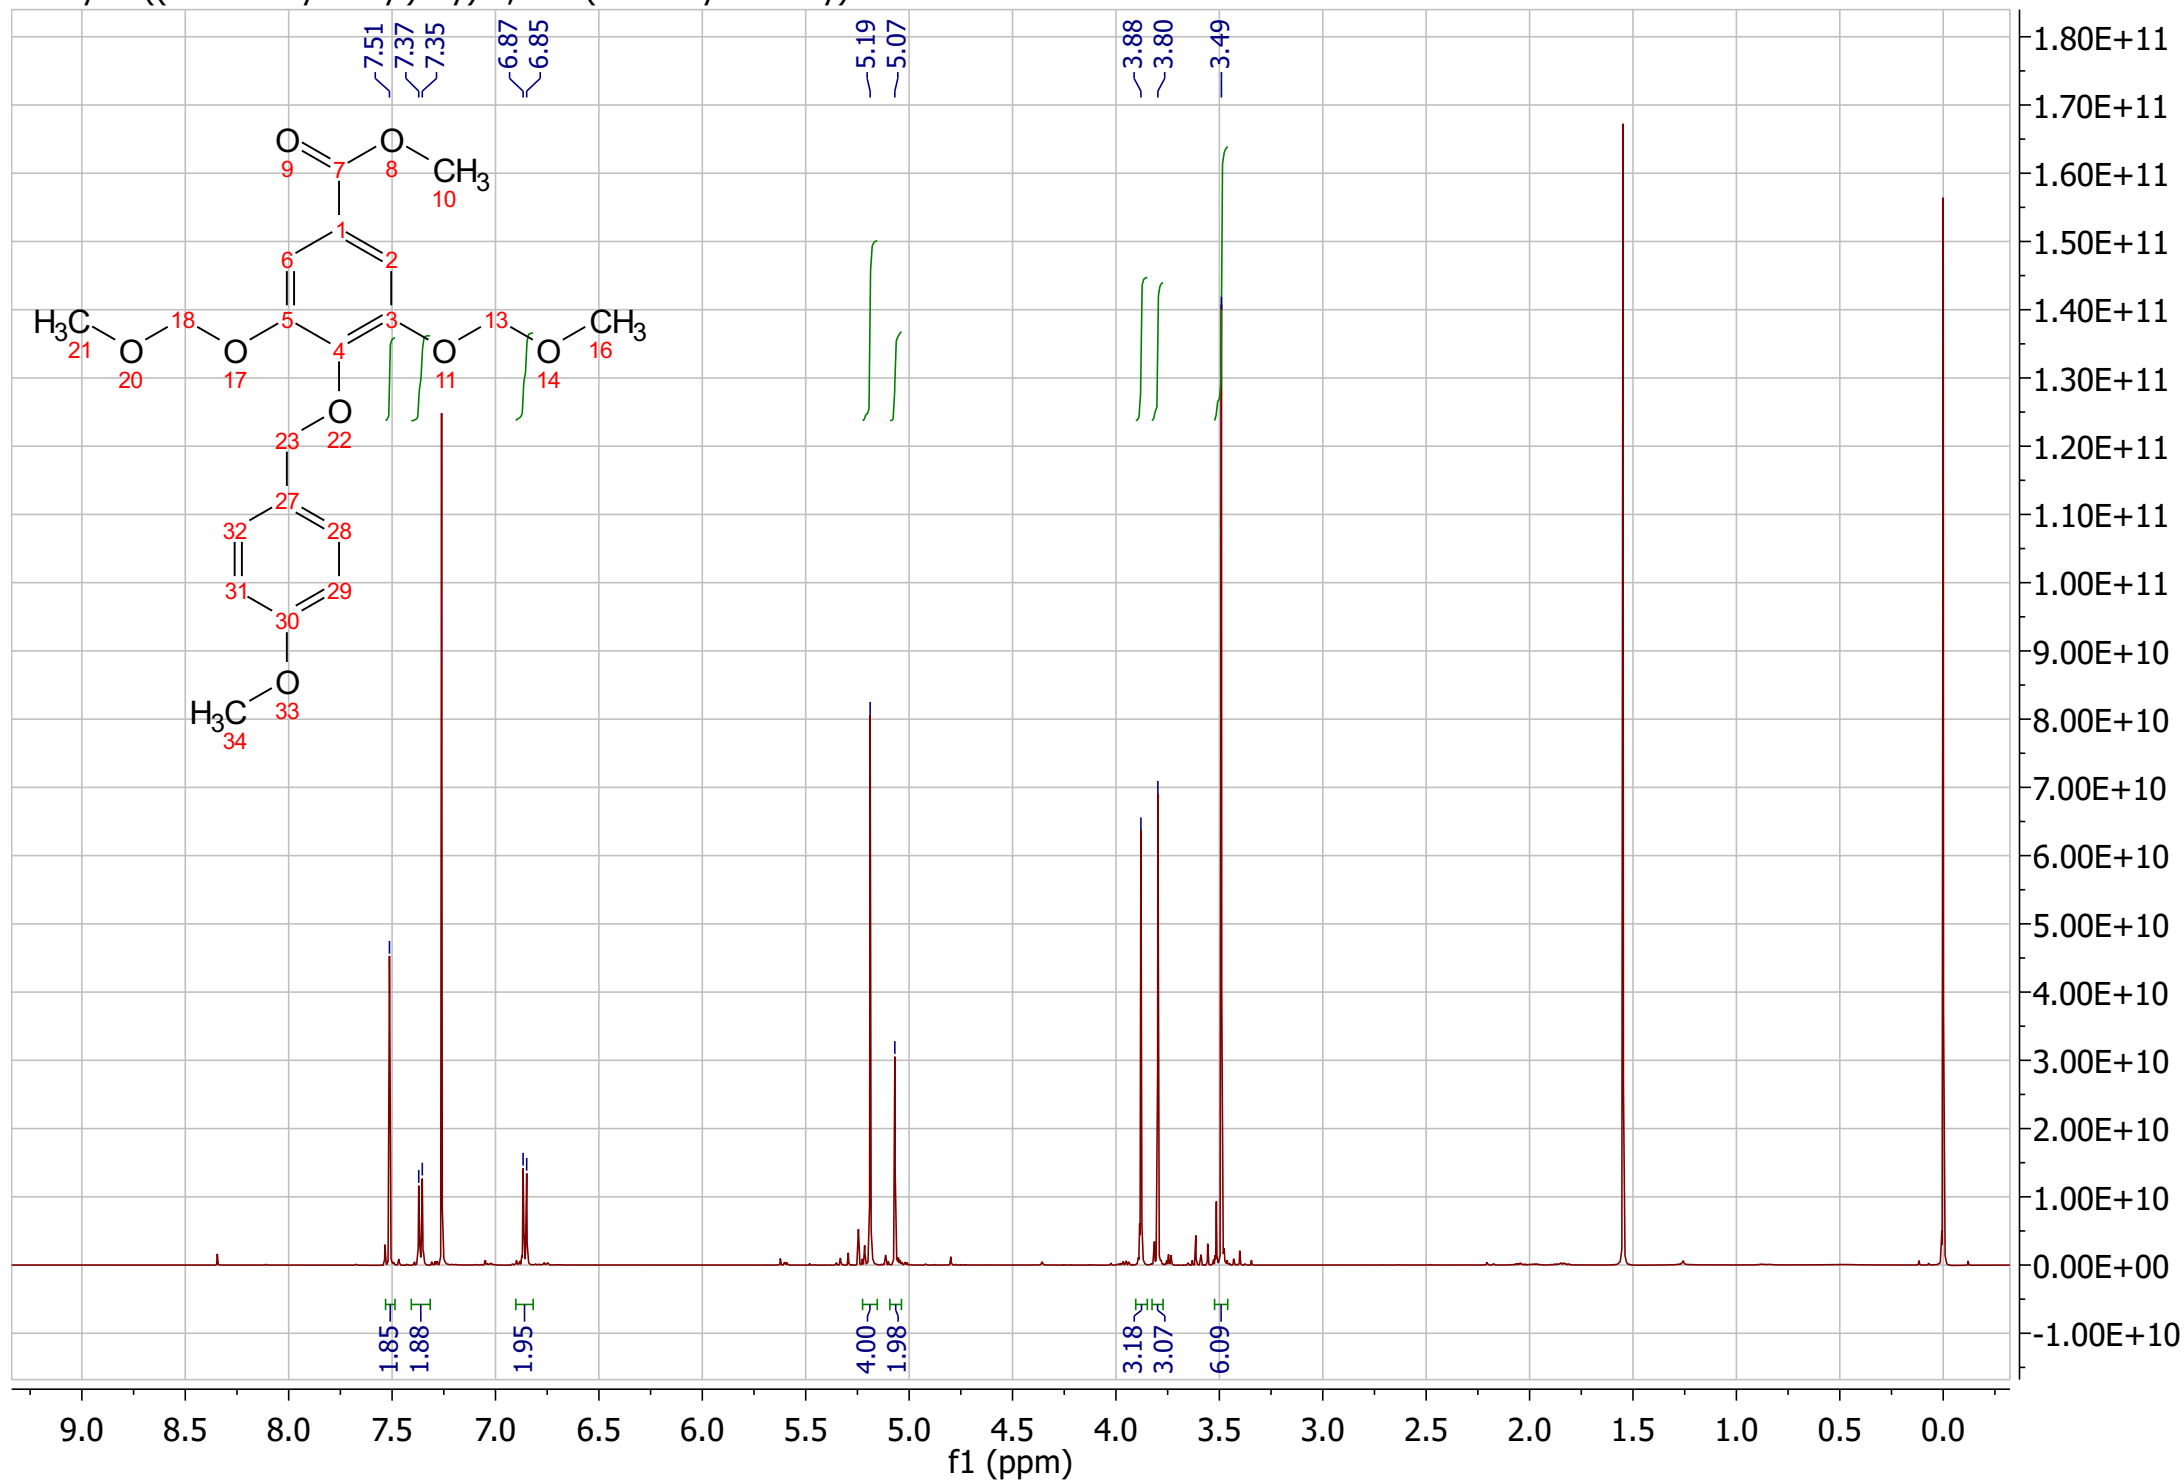

Methyl 4-((4-methoxybenzyl)oxy)-3,5-bis(methoxymethoxy)benzoate\_CDCl3

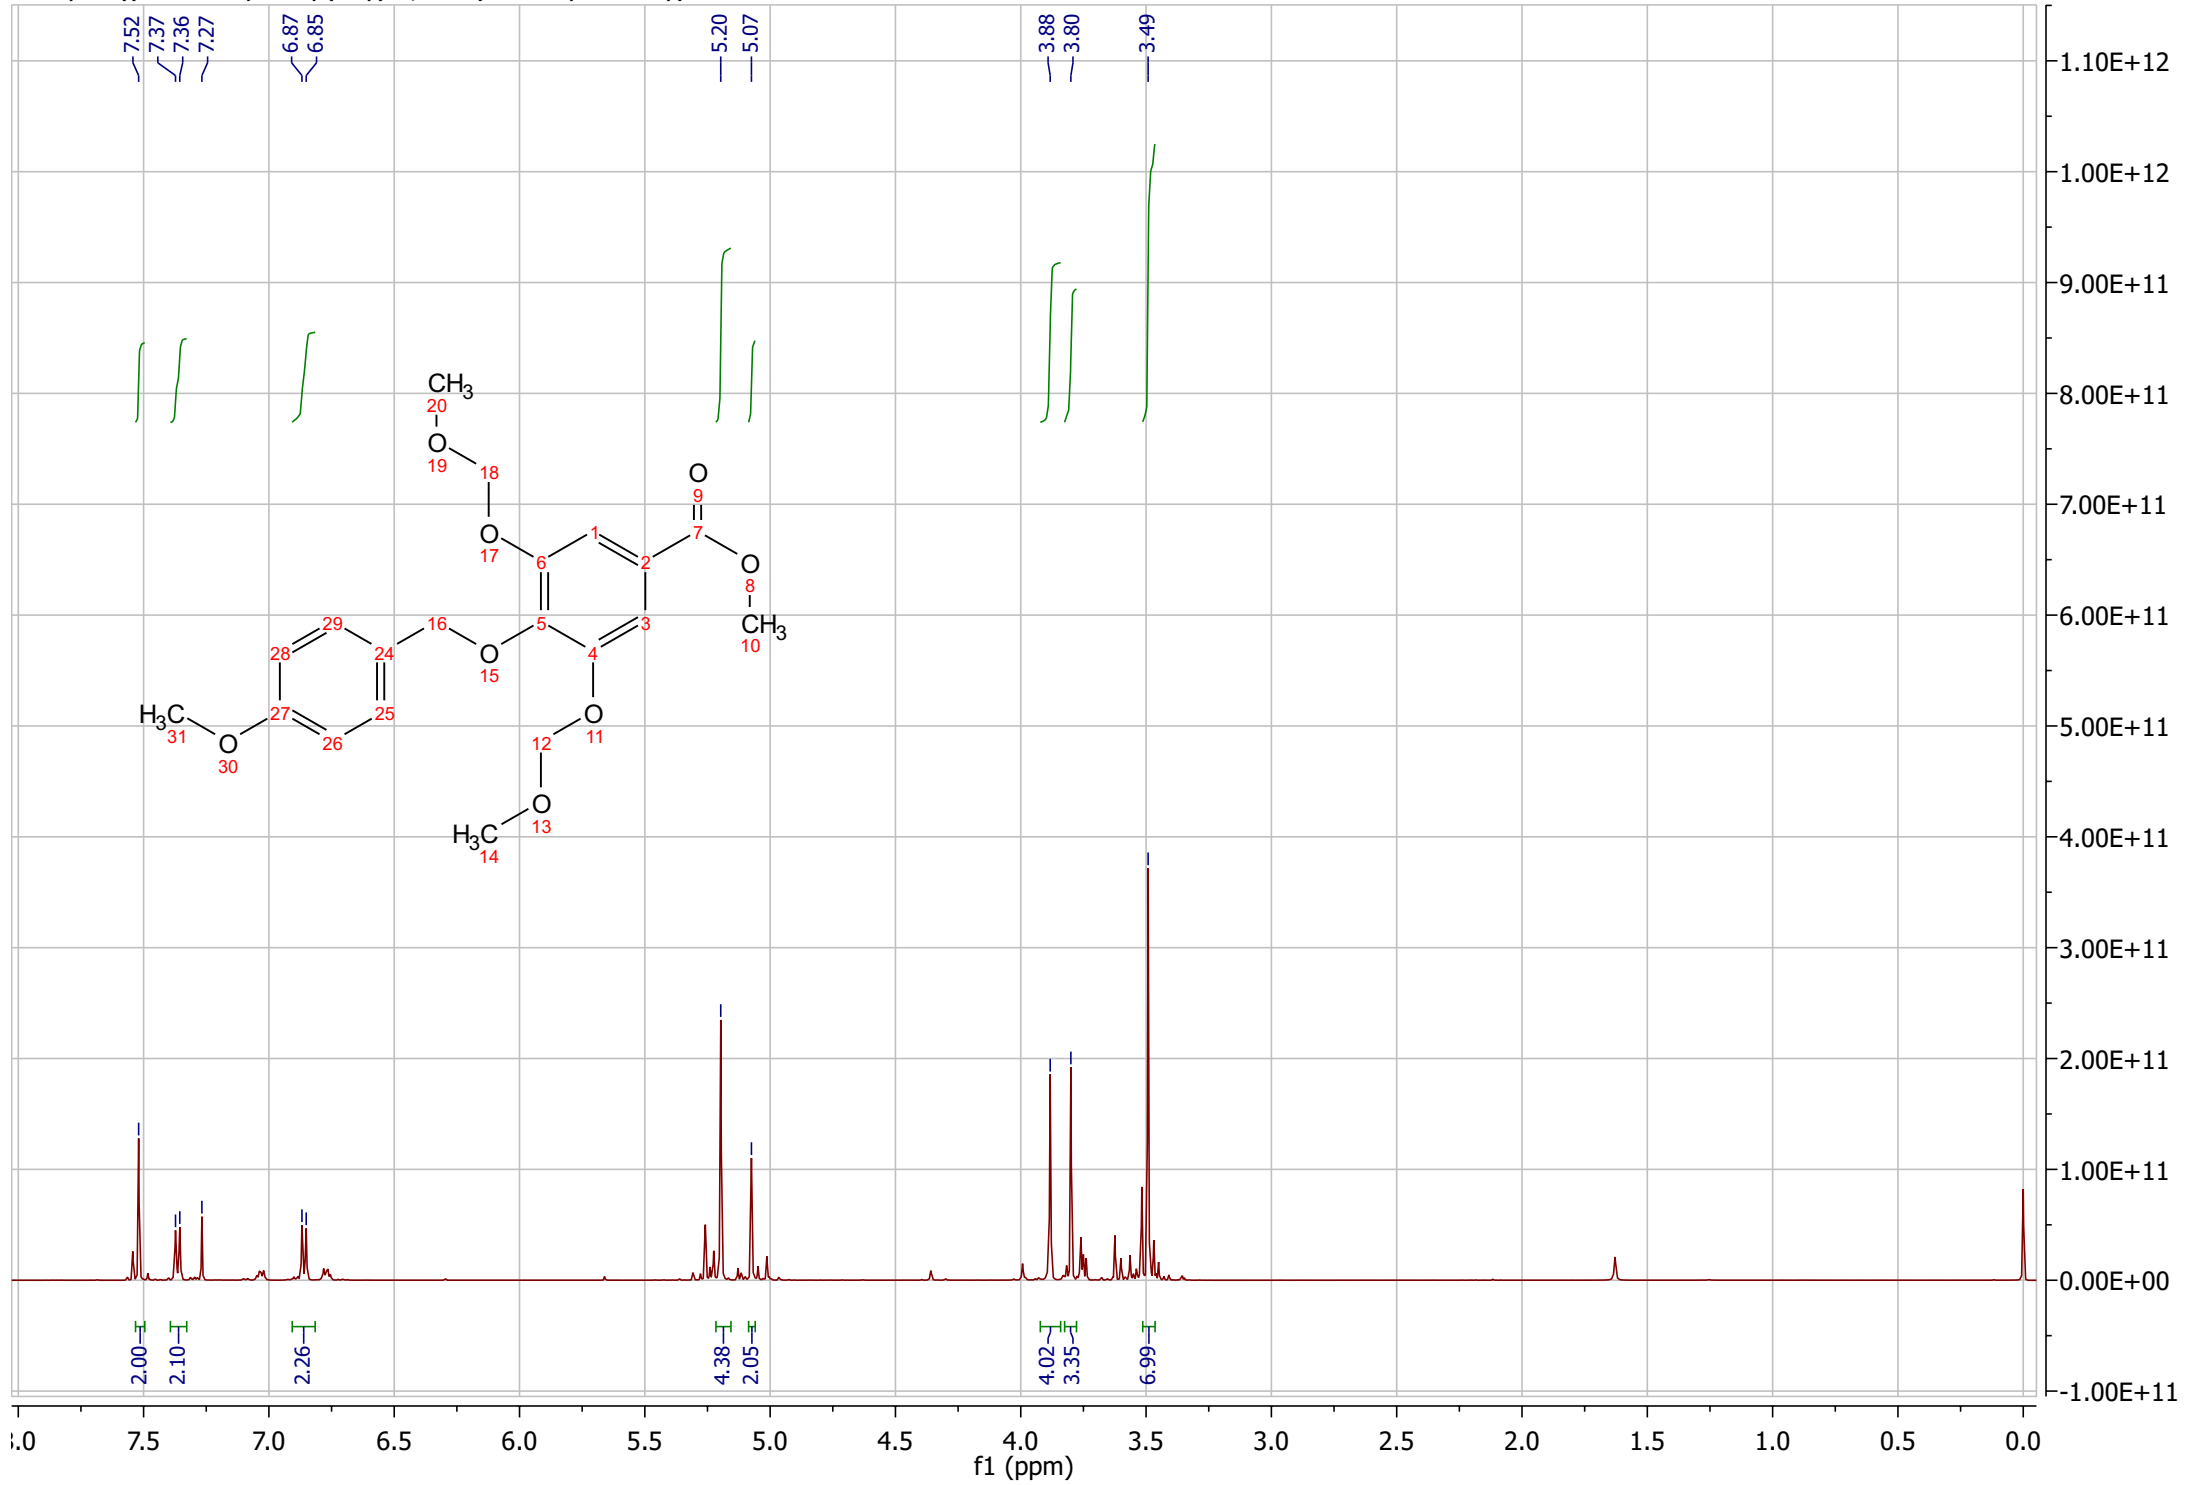

Methyl 4-((4-methoxybenzyl)oxy)-3,5-bis(methoxymethoxy)benzoate\_CDCl3

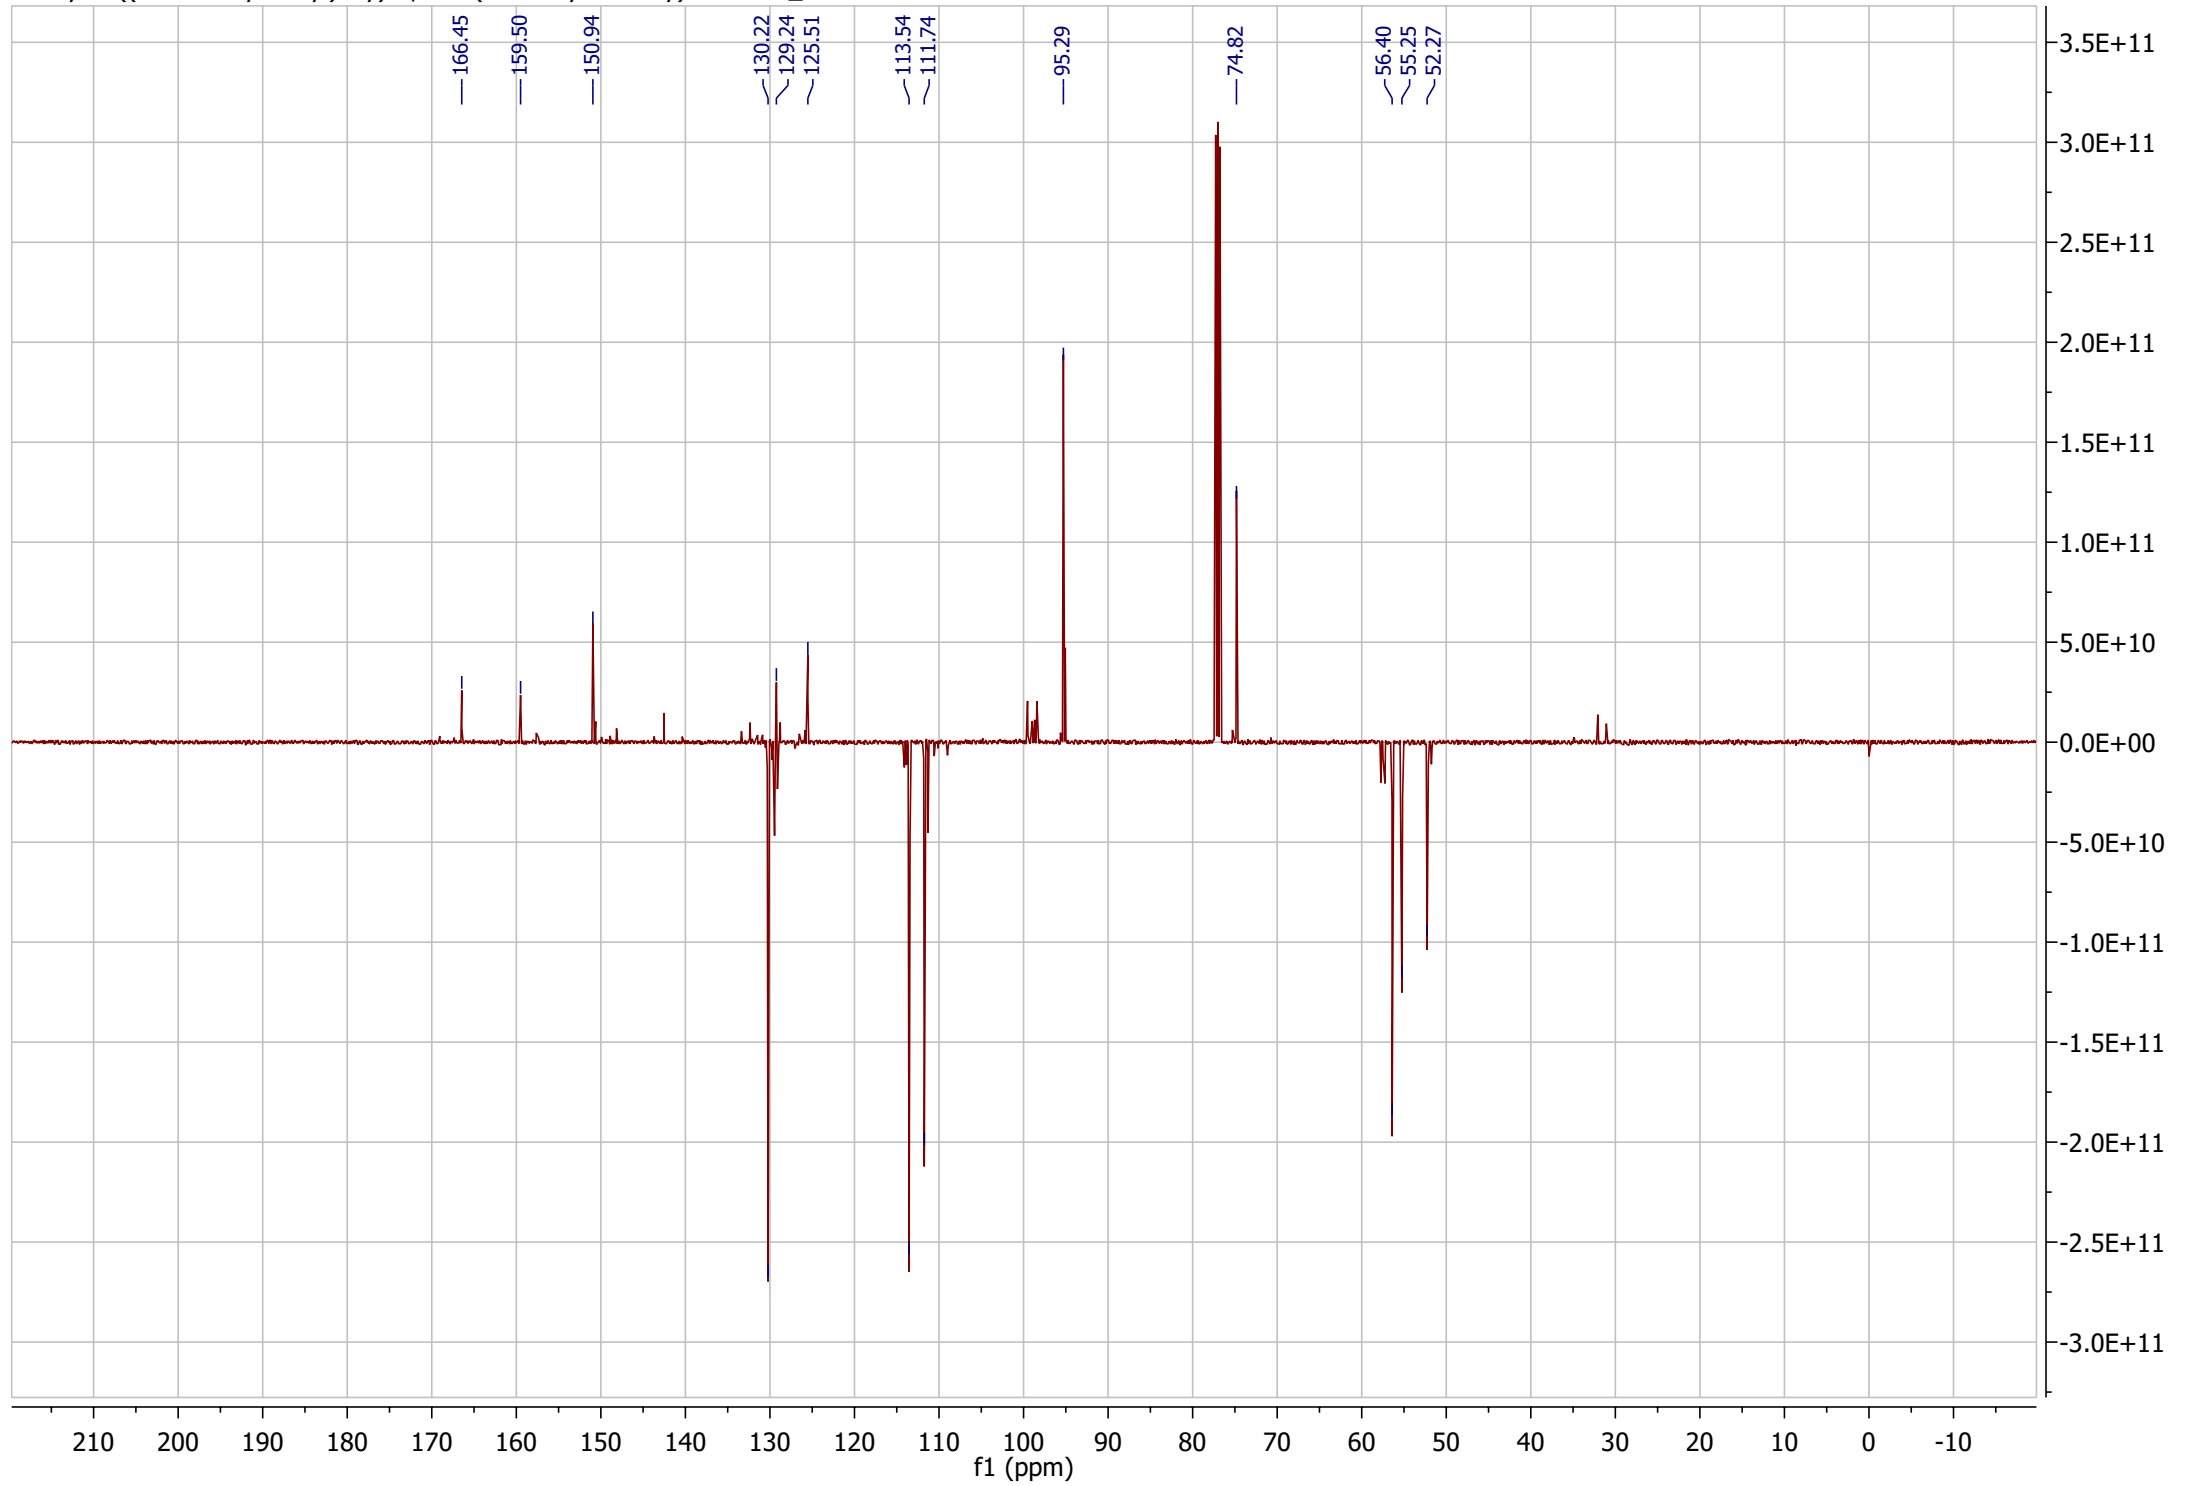

Methyl 4-((4-methoxybenzyl)oxy)-3,5-bis(methoxymethoxy)benzoate\_CDCl3



methyl 3,4,5-tris(methoxymethoxy)benzoate\_CDCl3

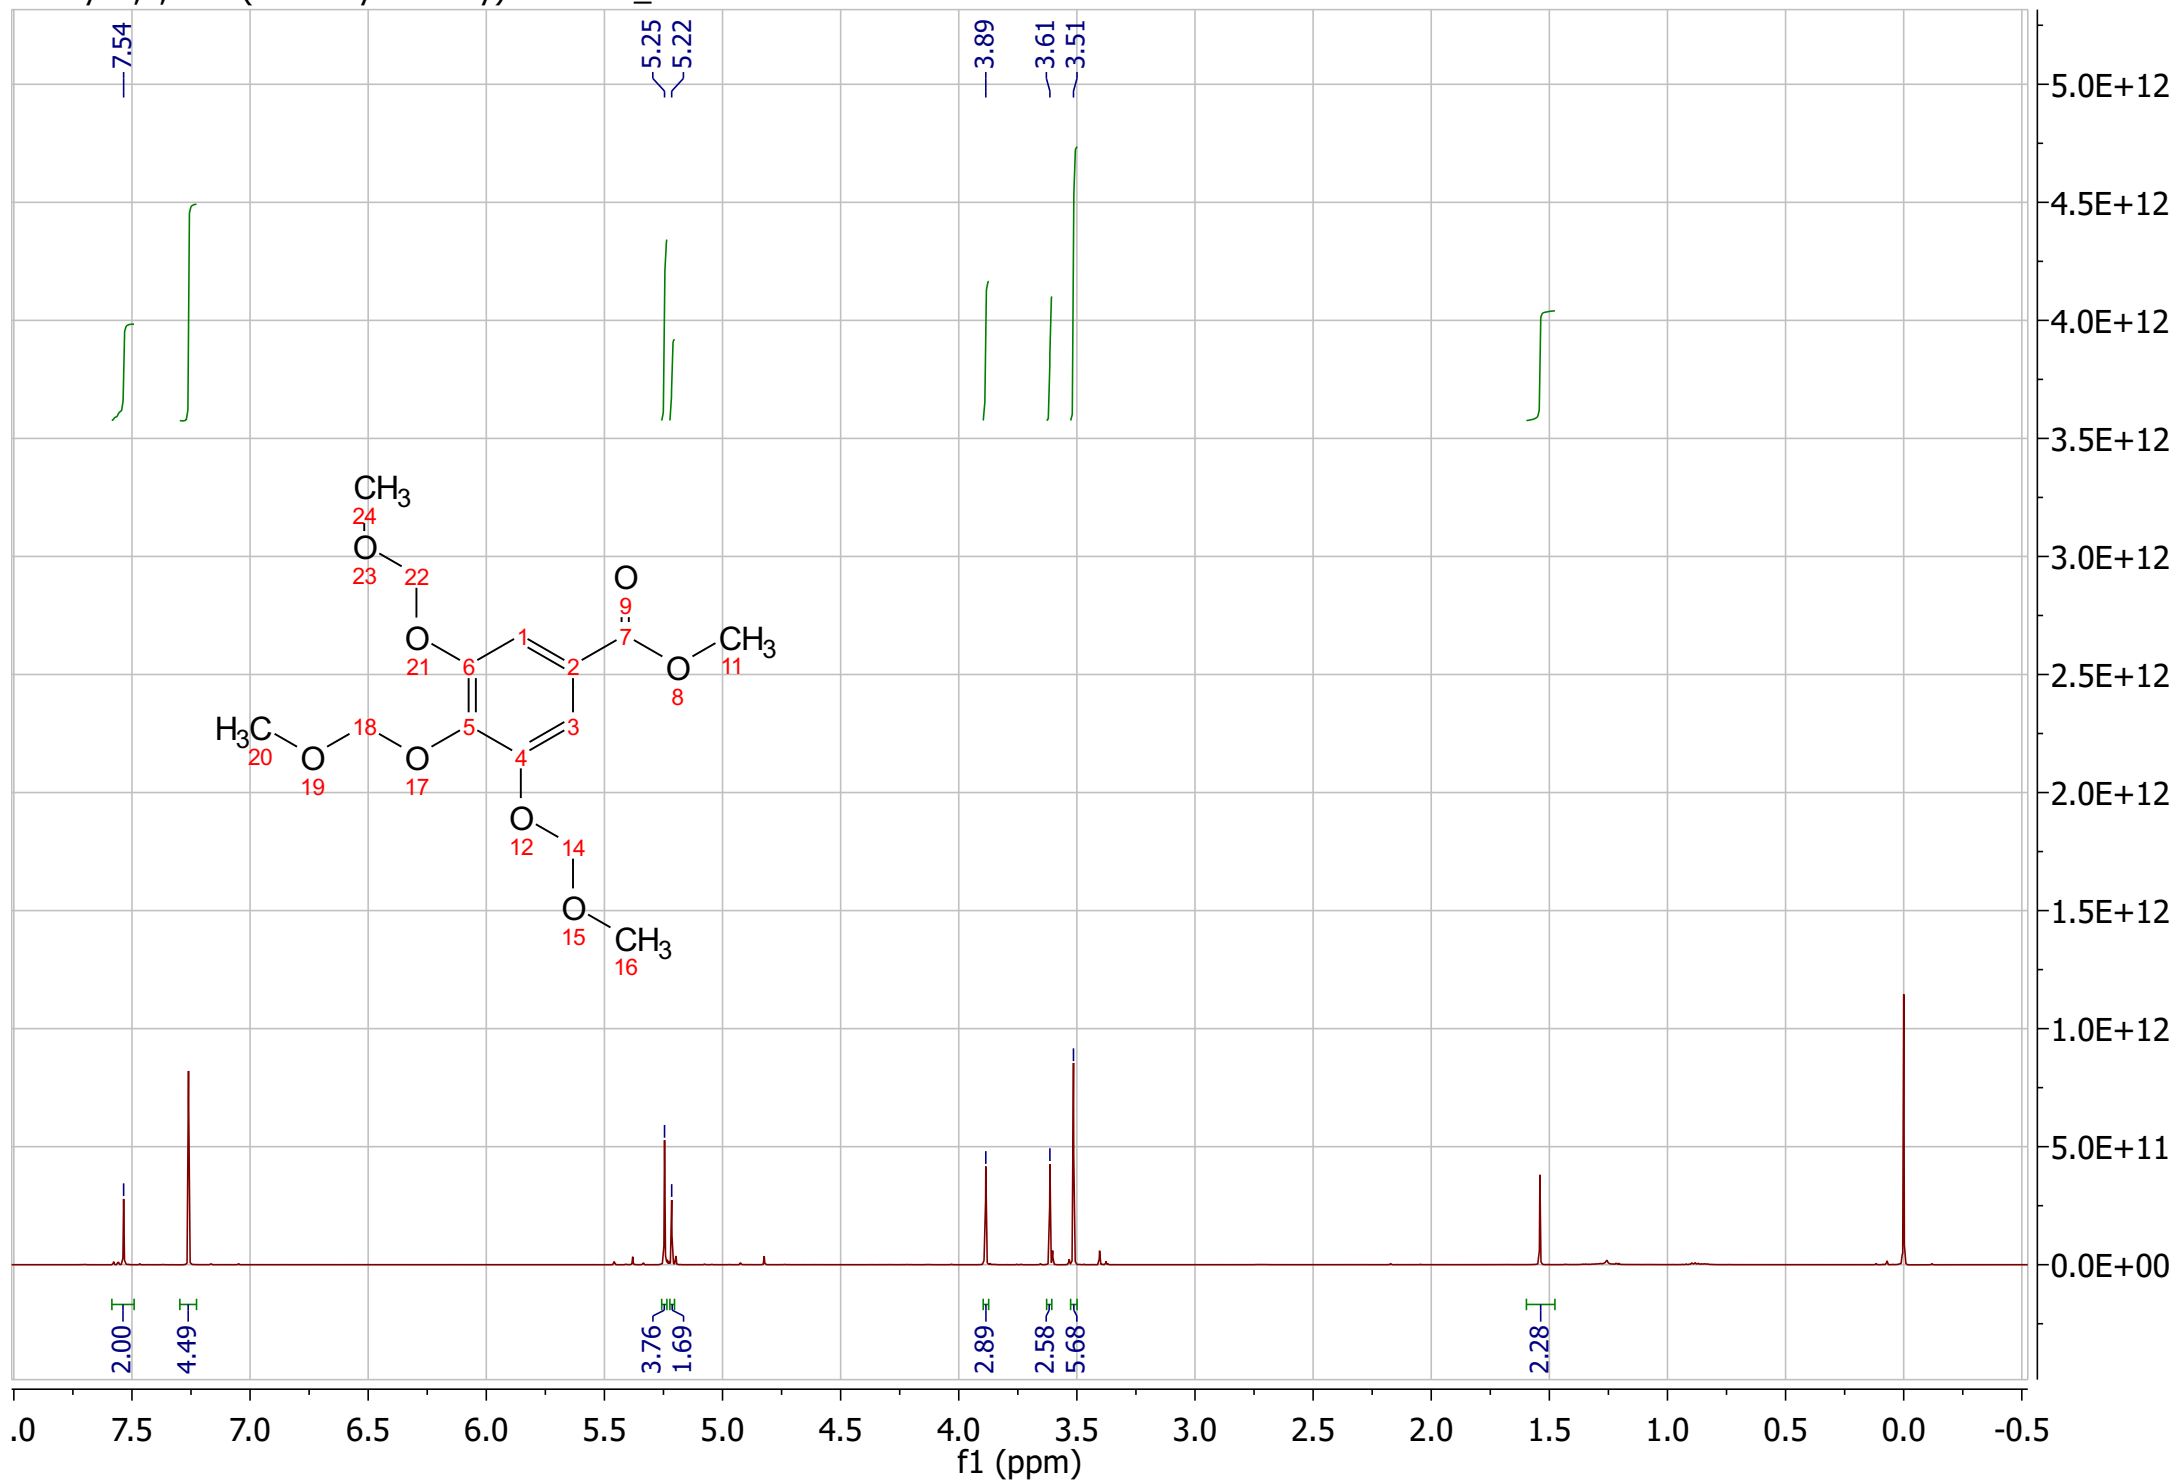

Methyl 4-hydroxy-3,5-bis(methoxymethoxy)benzoate\_DMSO

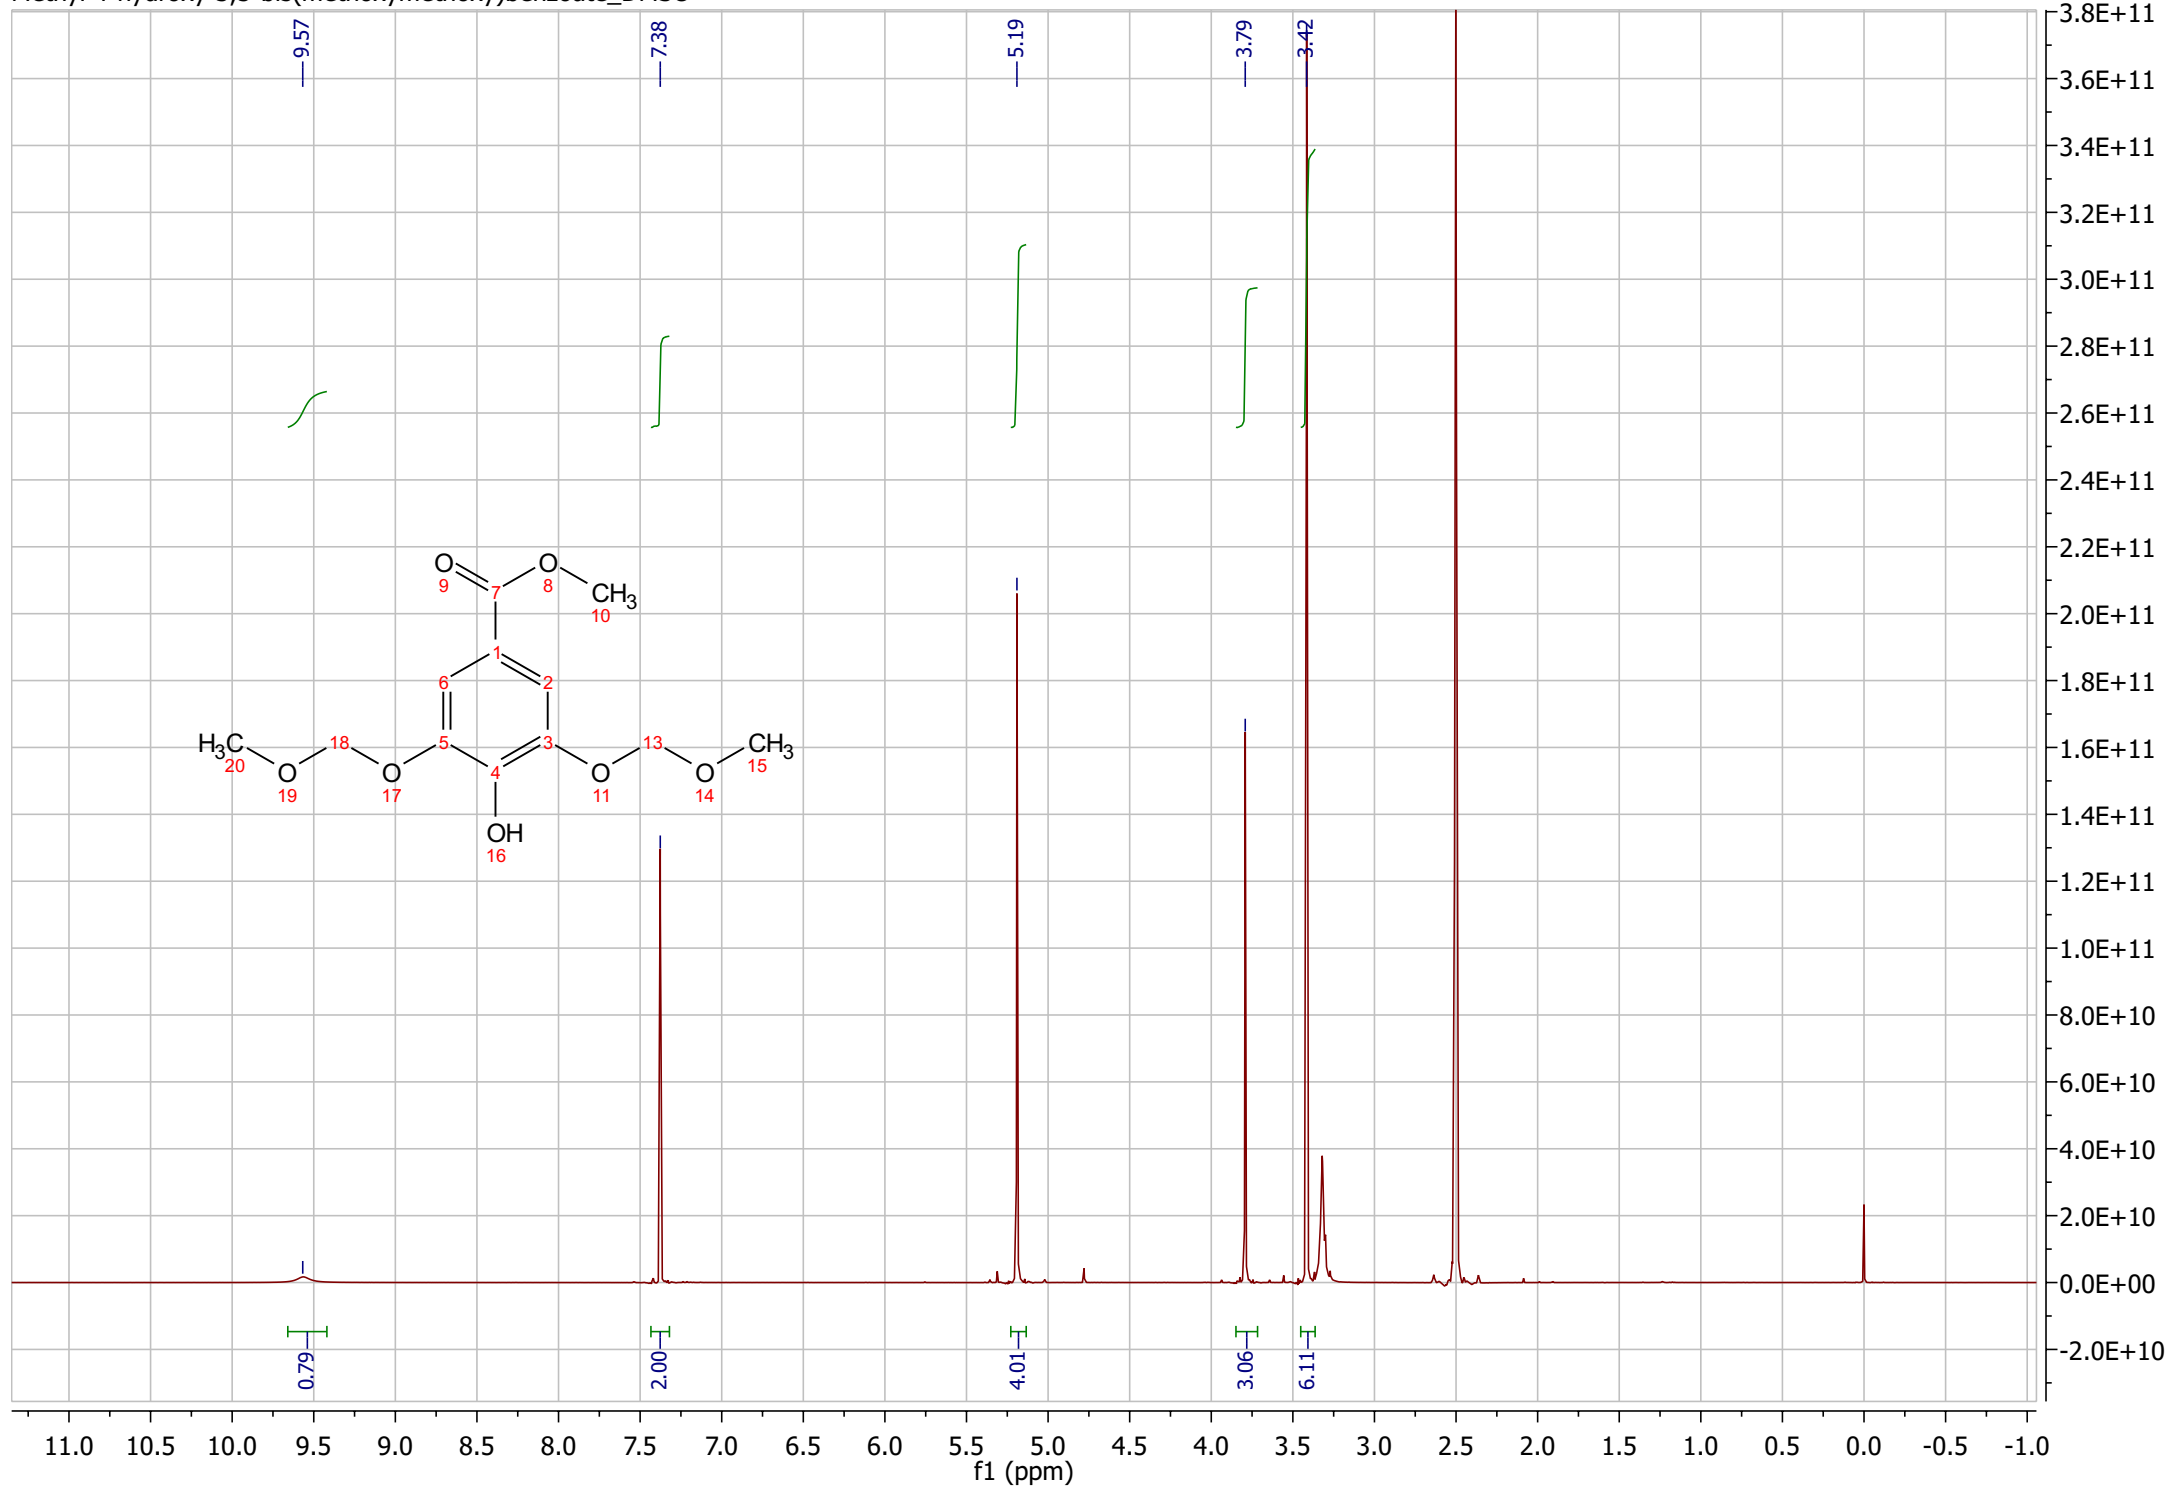



Methyl 4-hydroxy-3,5-bis(methoxymethoxy)benzoate\_DMSO

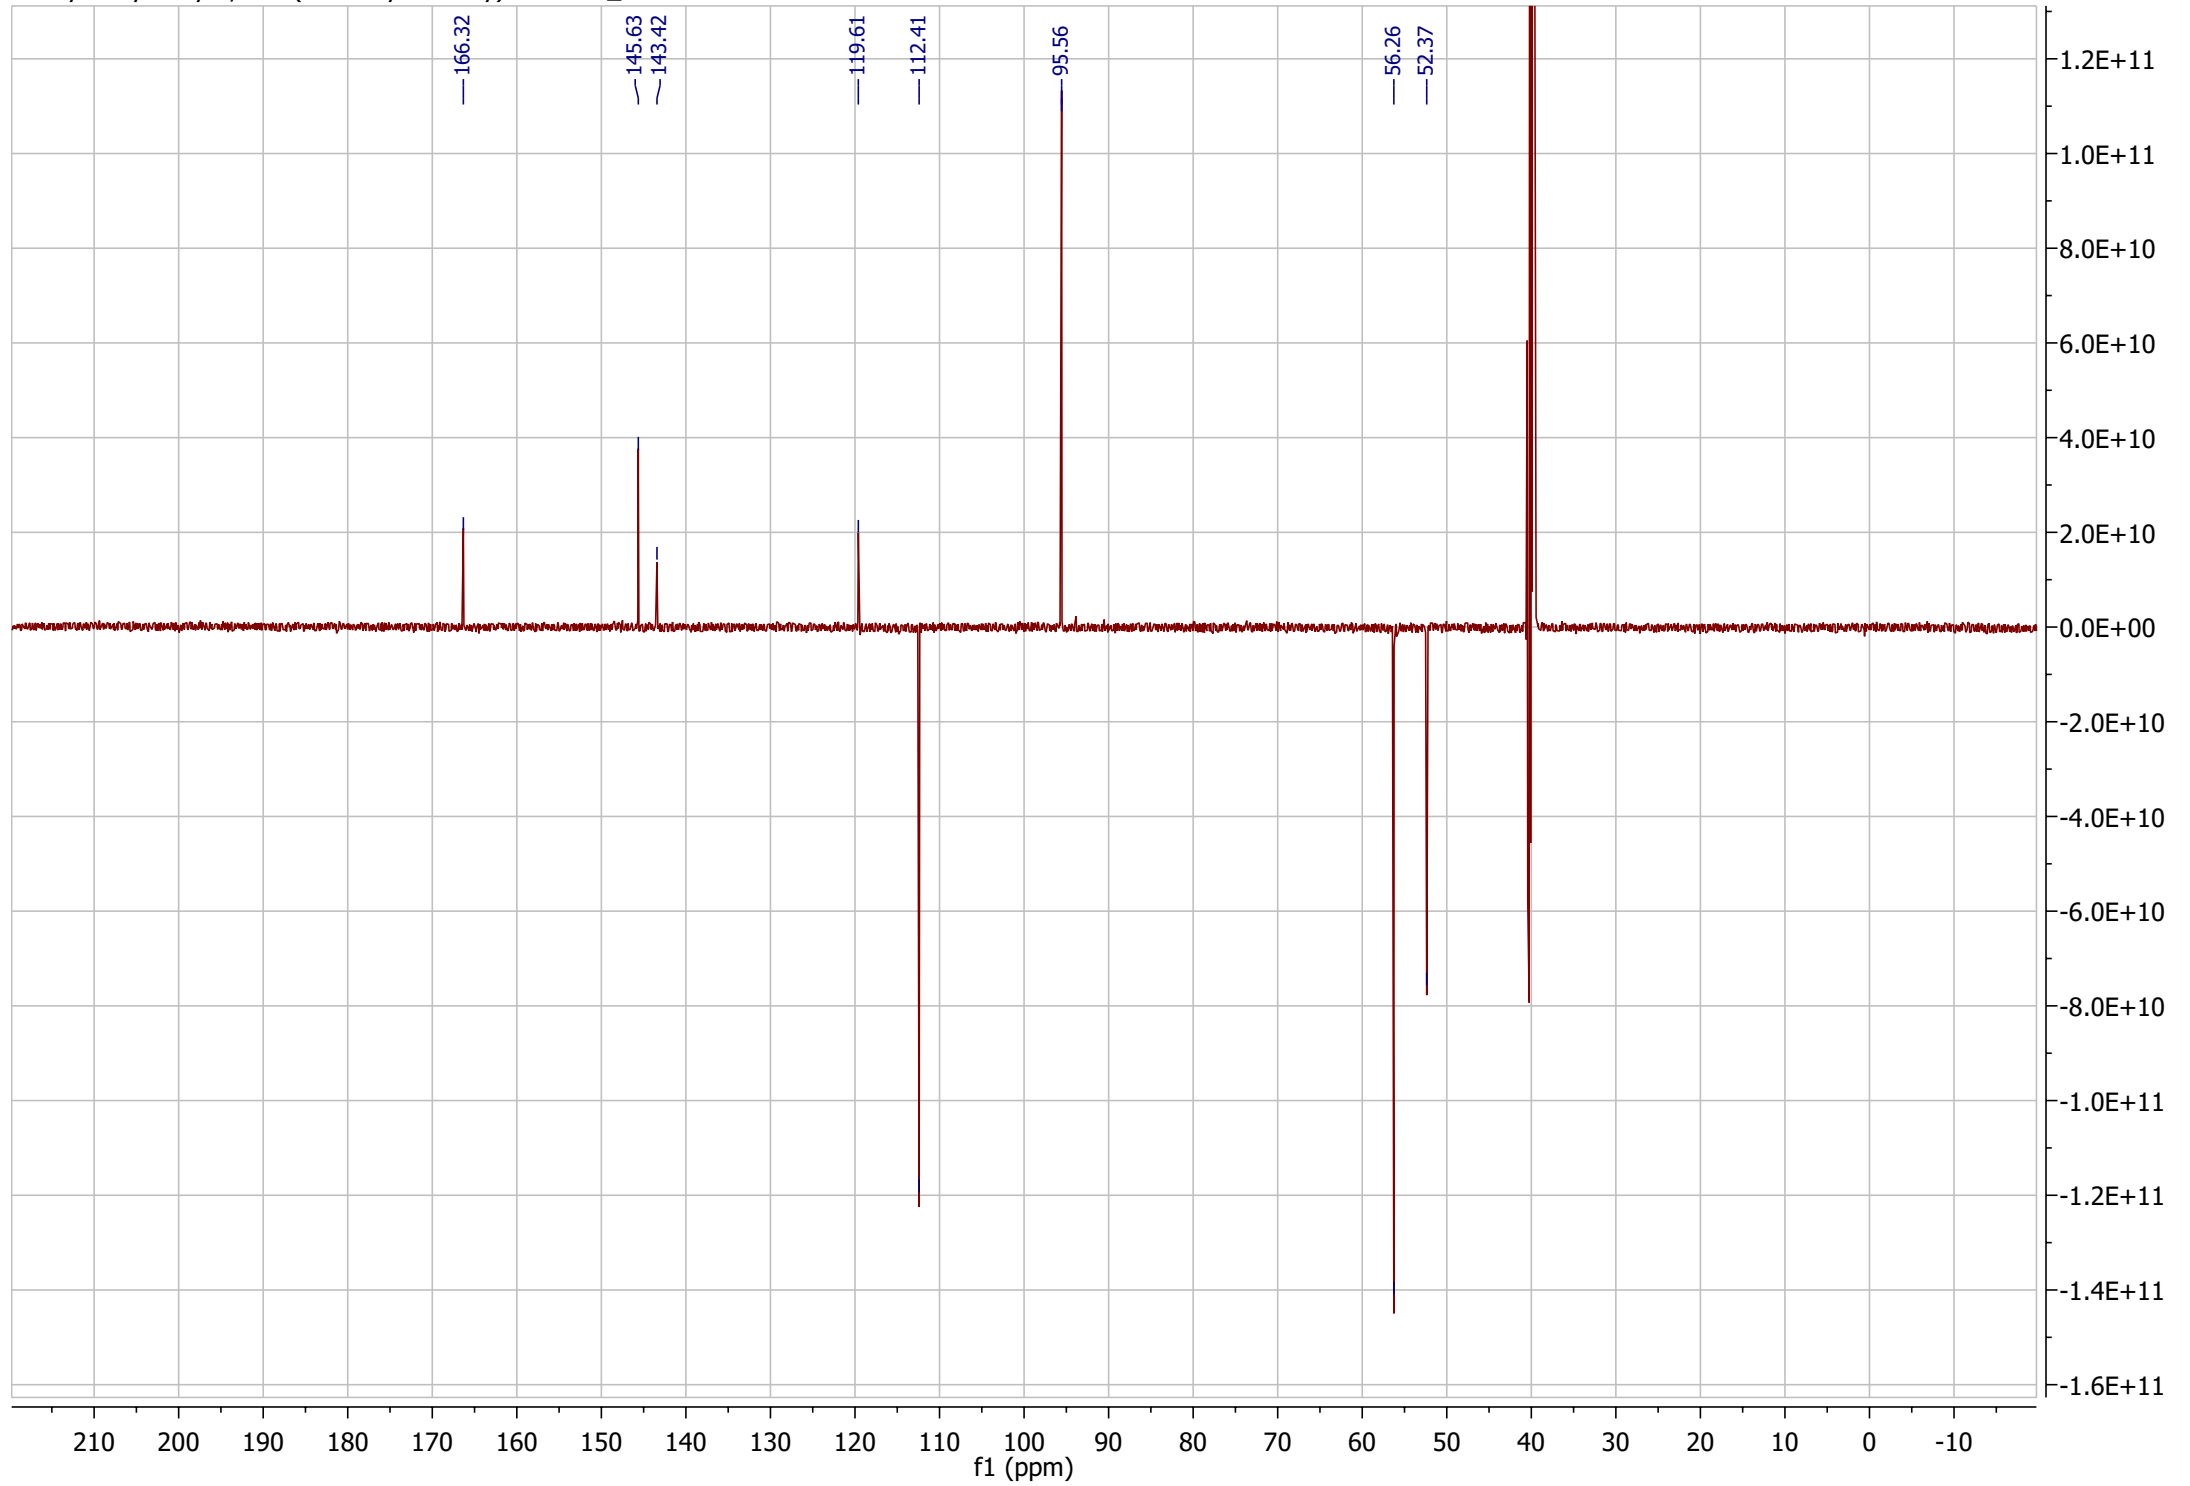

Methyl 3,5-bis(methoxymethoxy)-4-(2-morpholinoethoxy)benzoate\_CDCI3

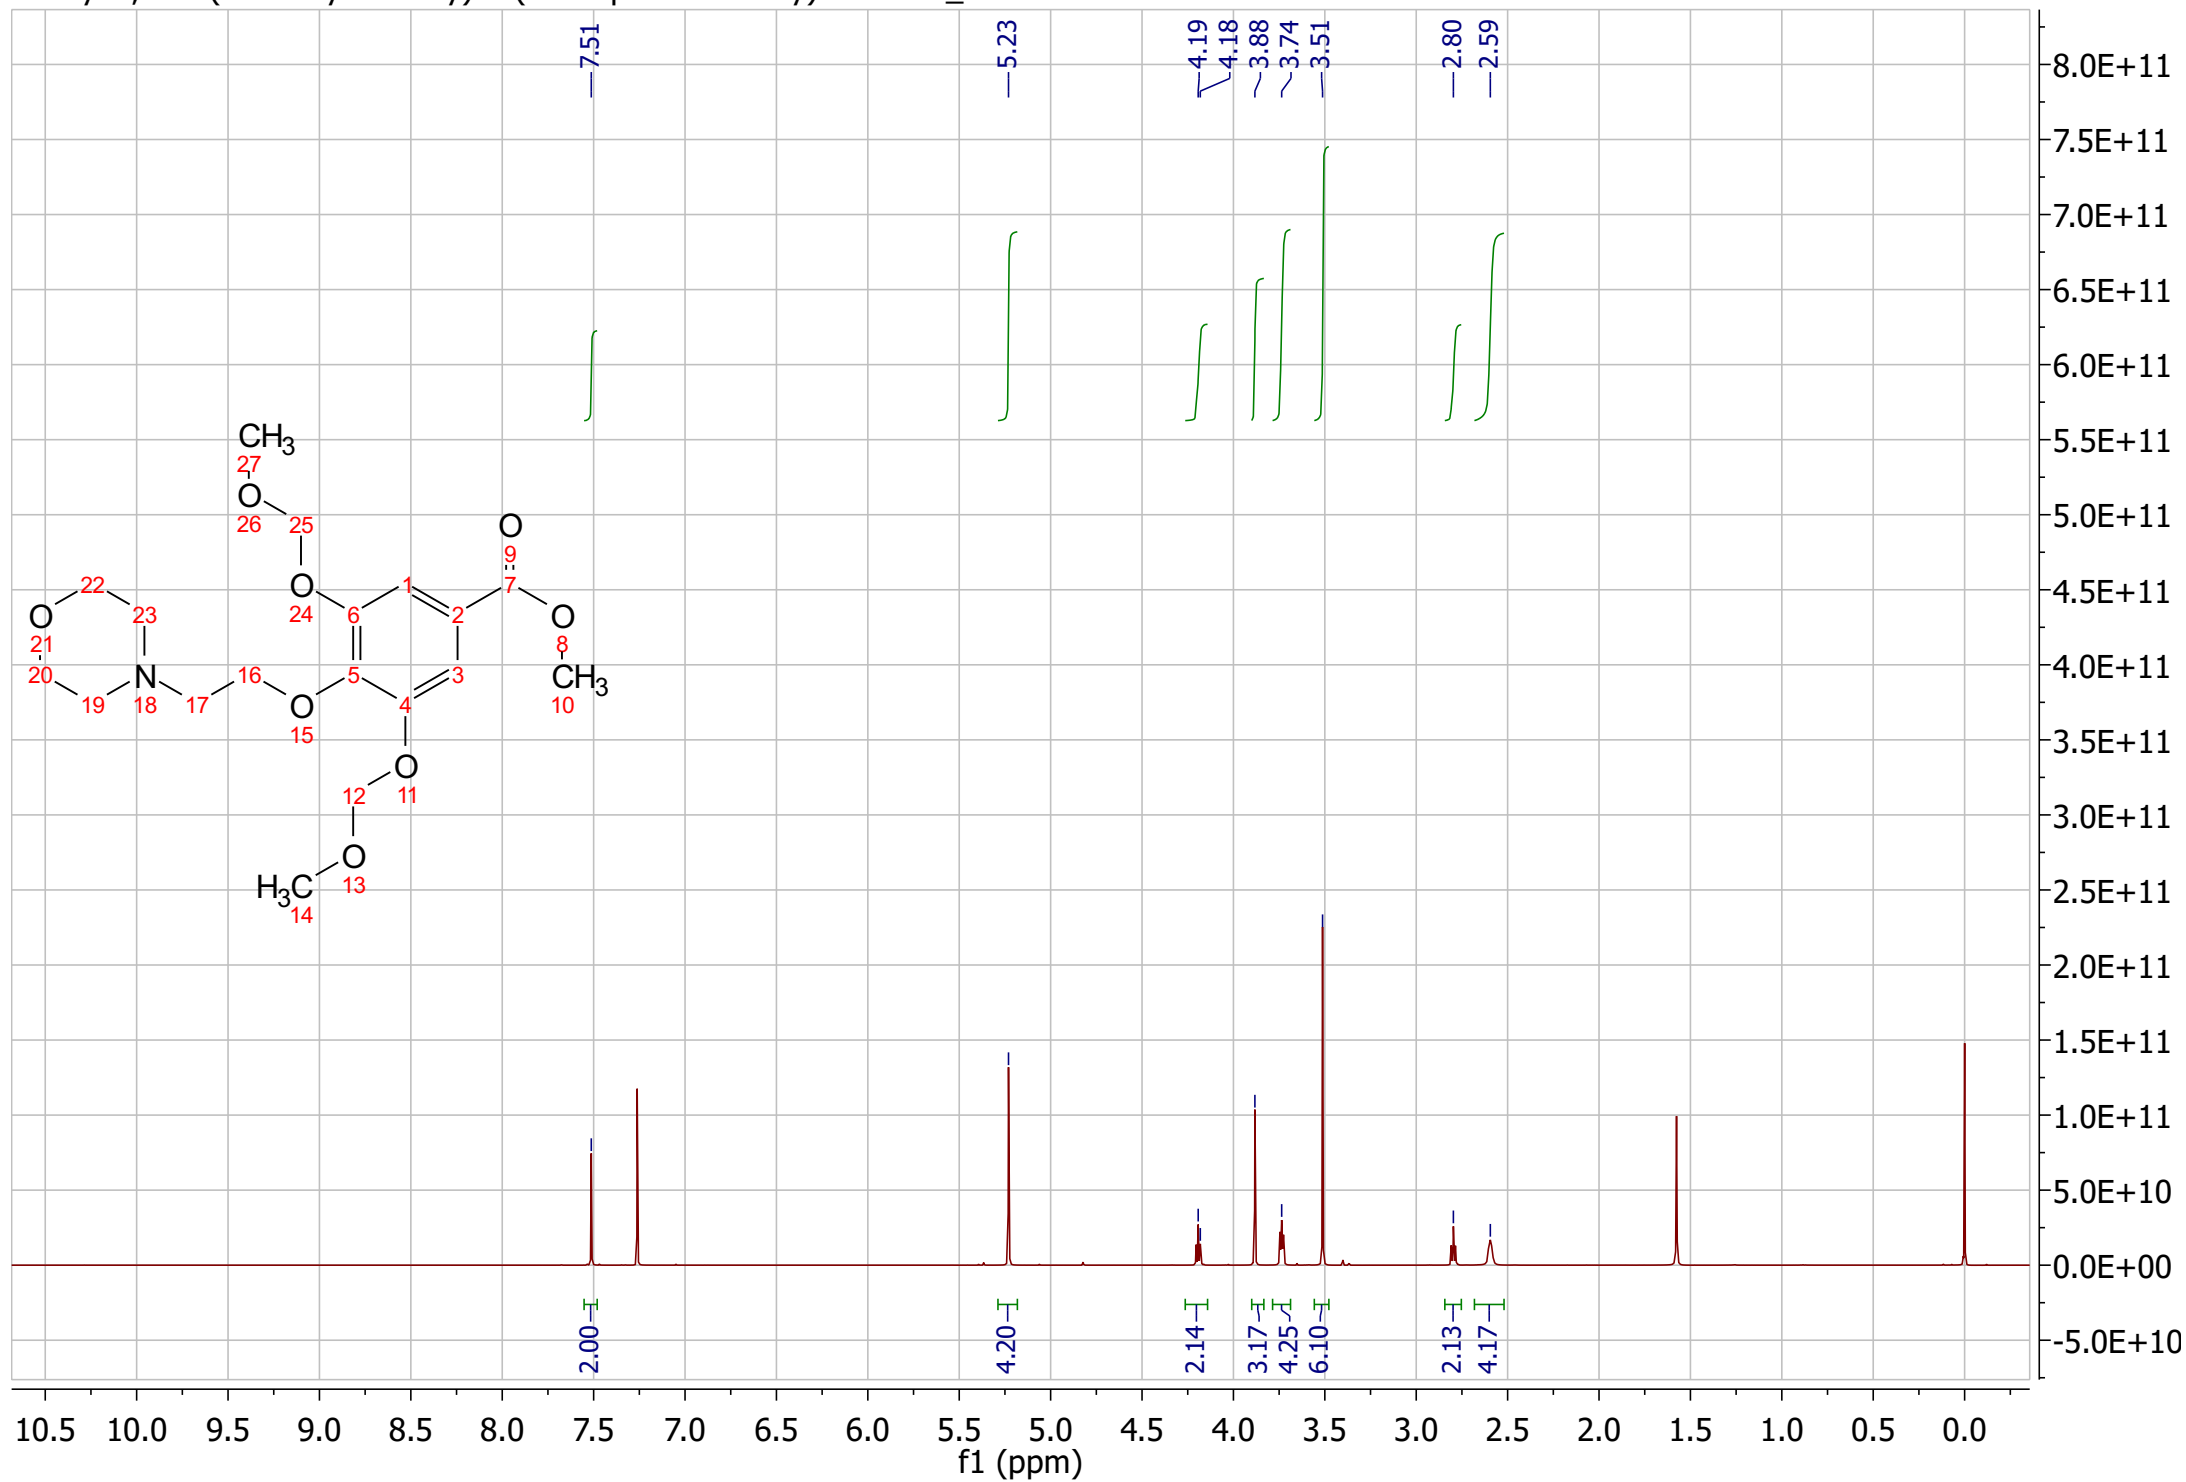

Methyl 3,5-bis(methoxymethoxy)-4-(2-morpholinoethoxy)benzoate\_CDCl3

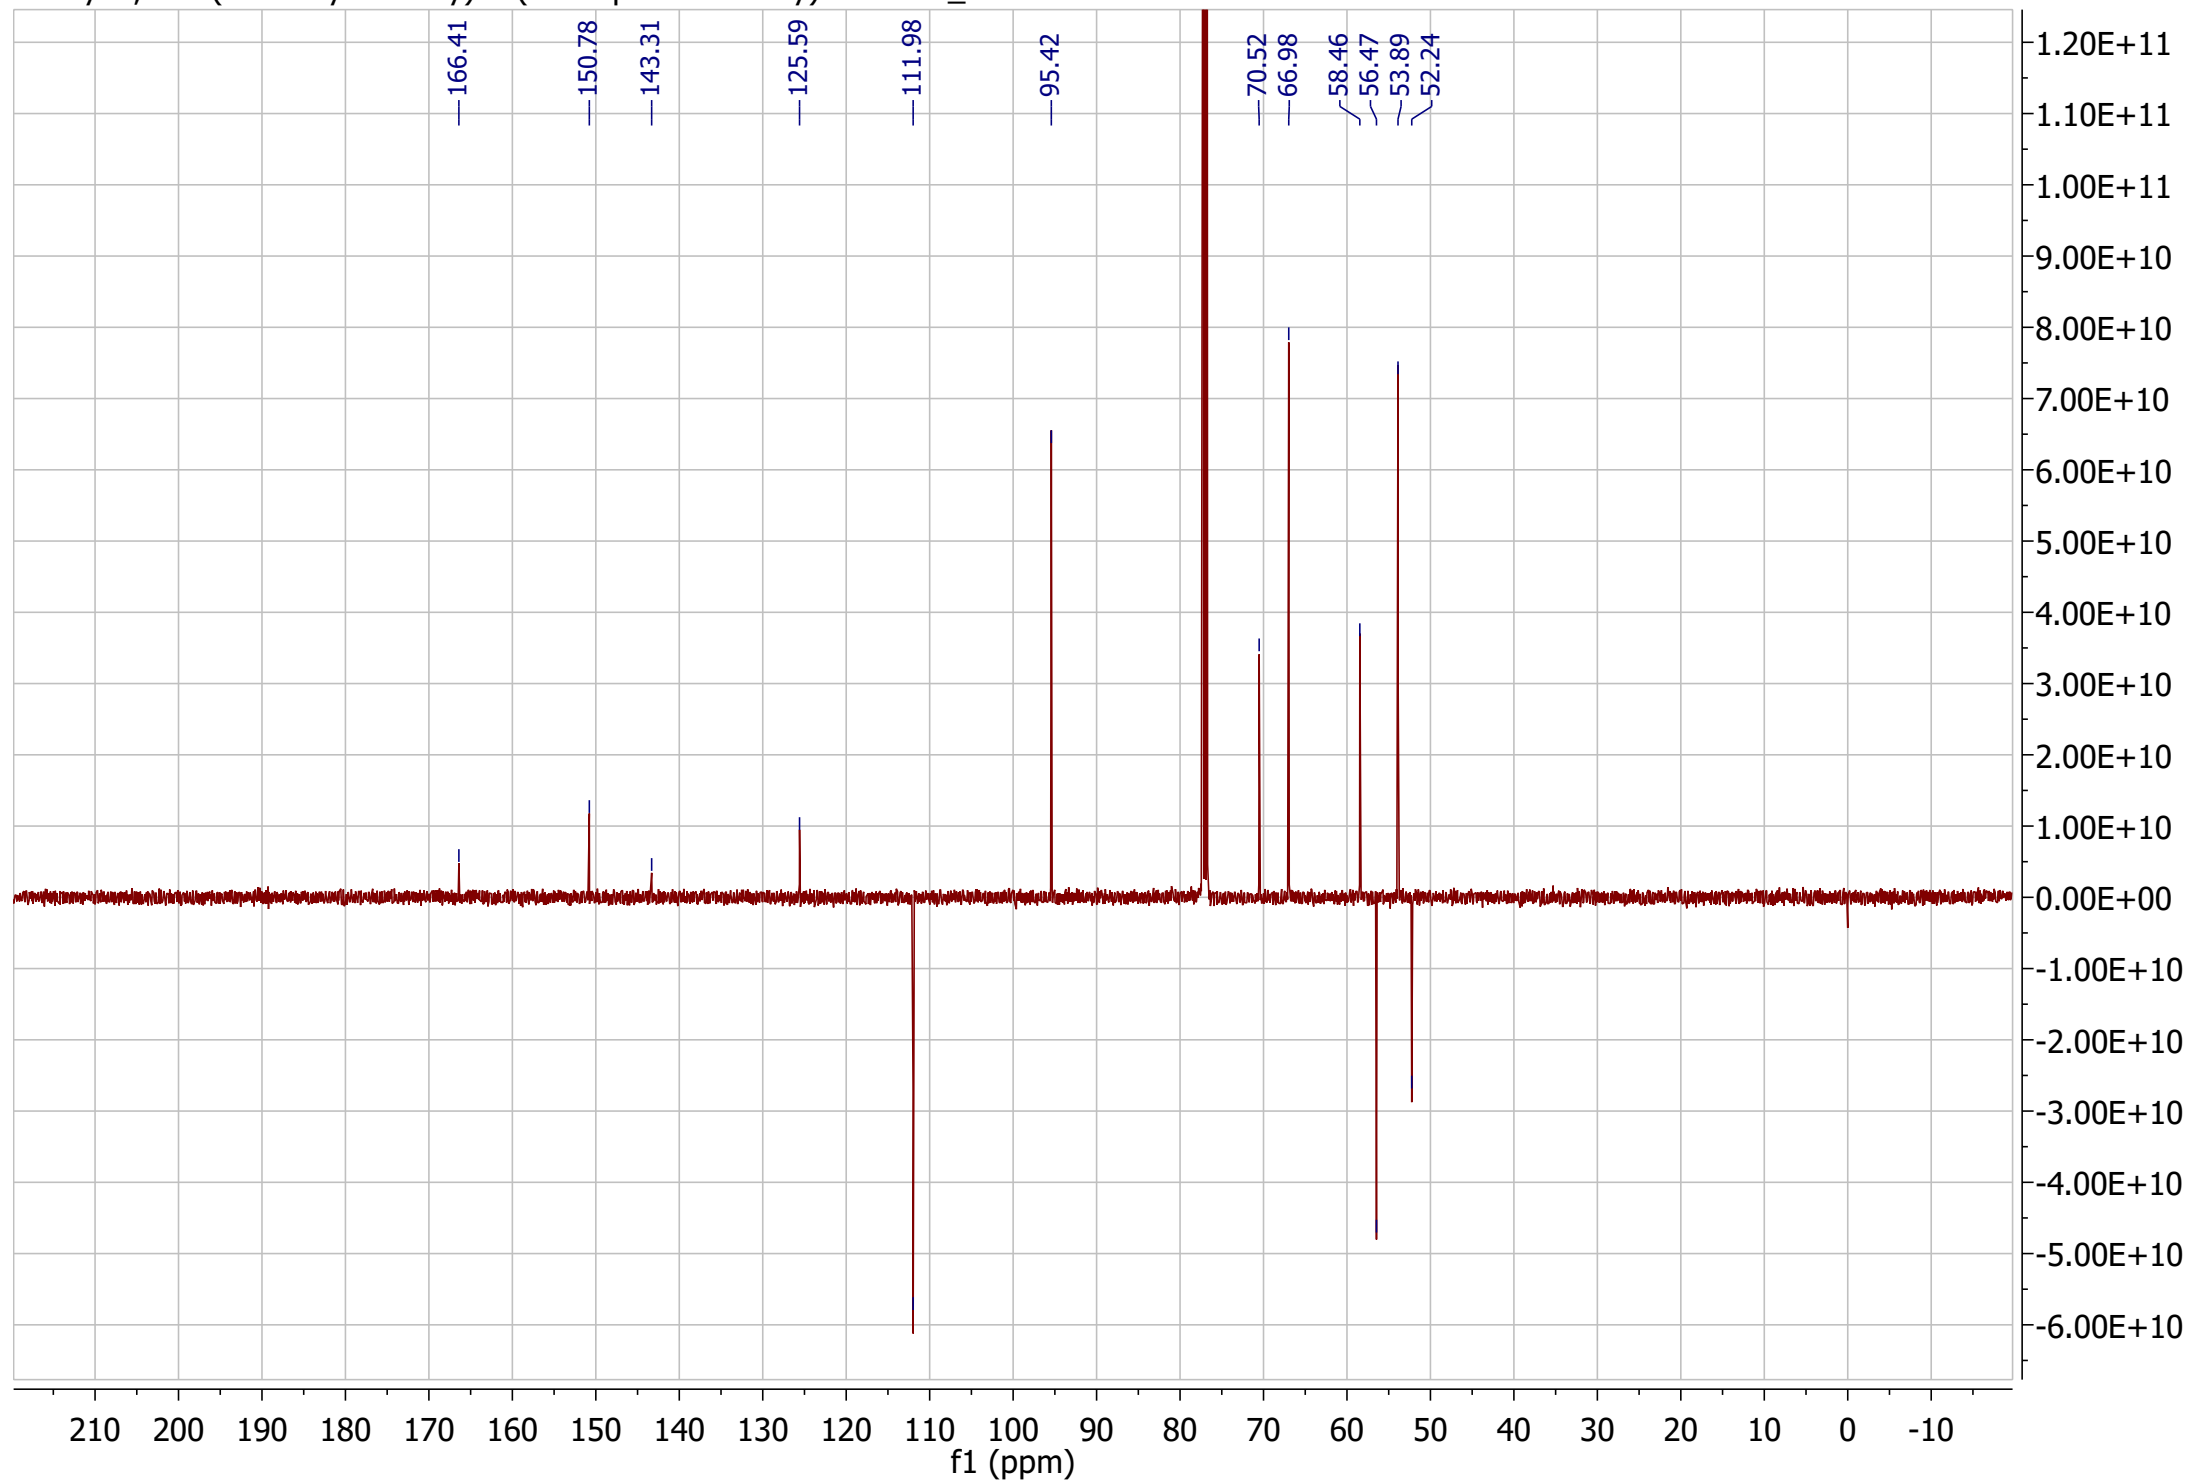

Methyl 4-(2-(benzyloxy)ethoxy)-3,5-bis(methoxymethoxy)benzoate\_DMSO

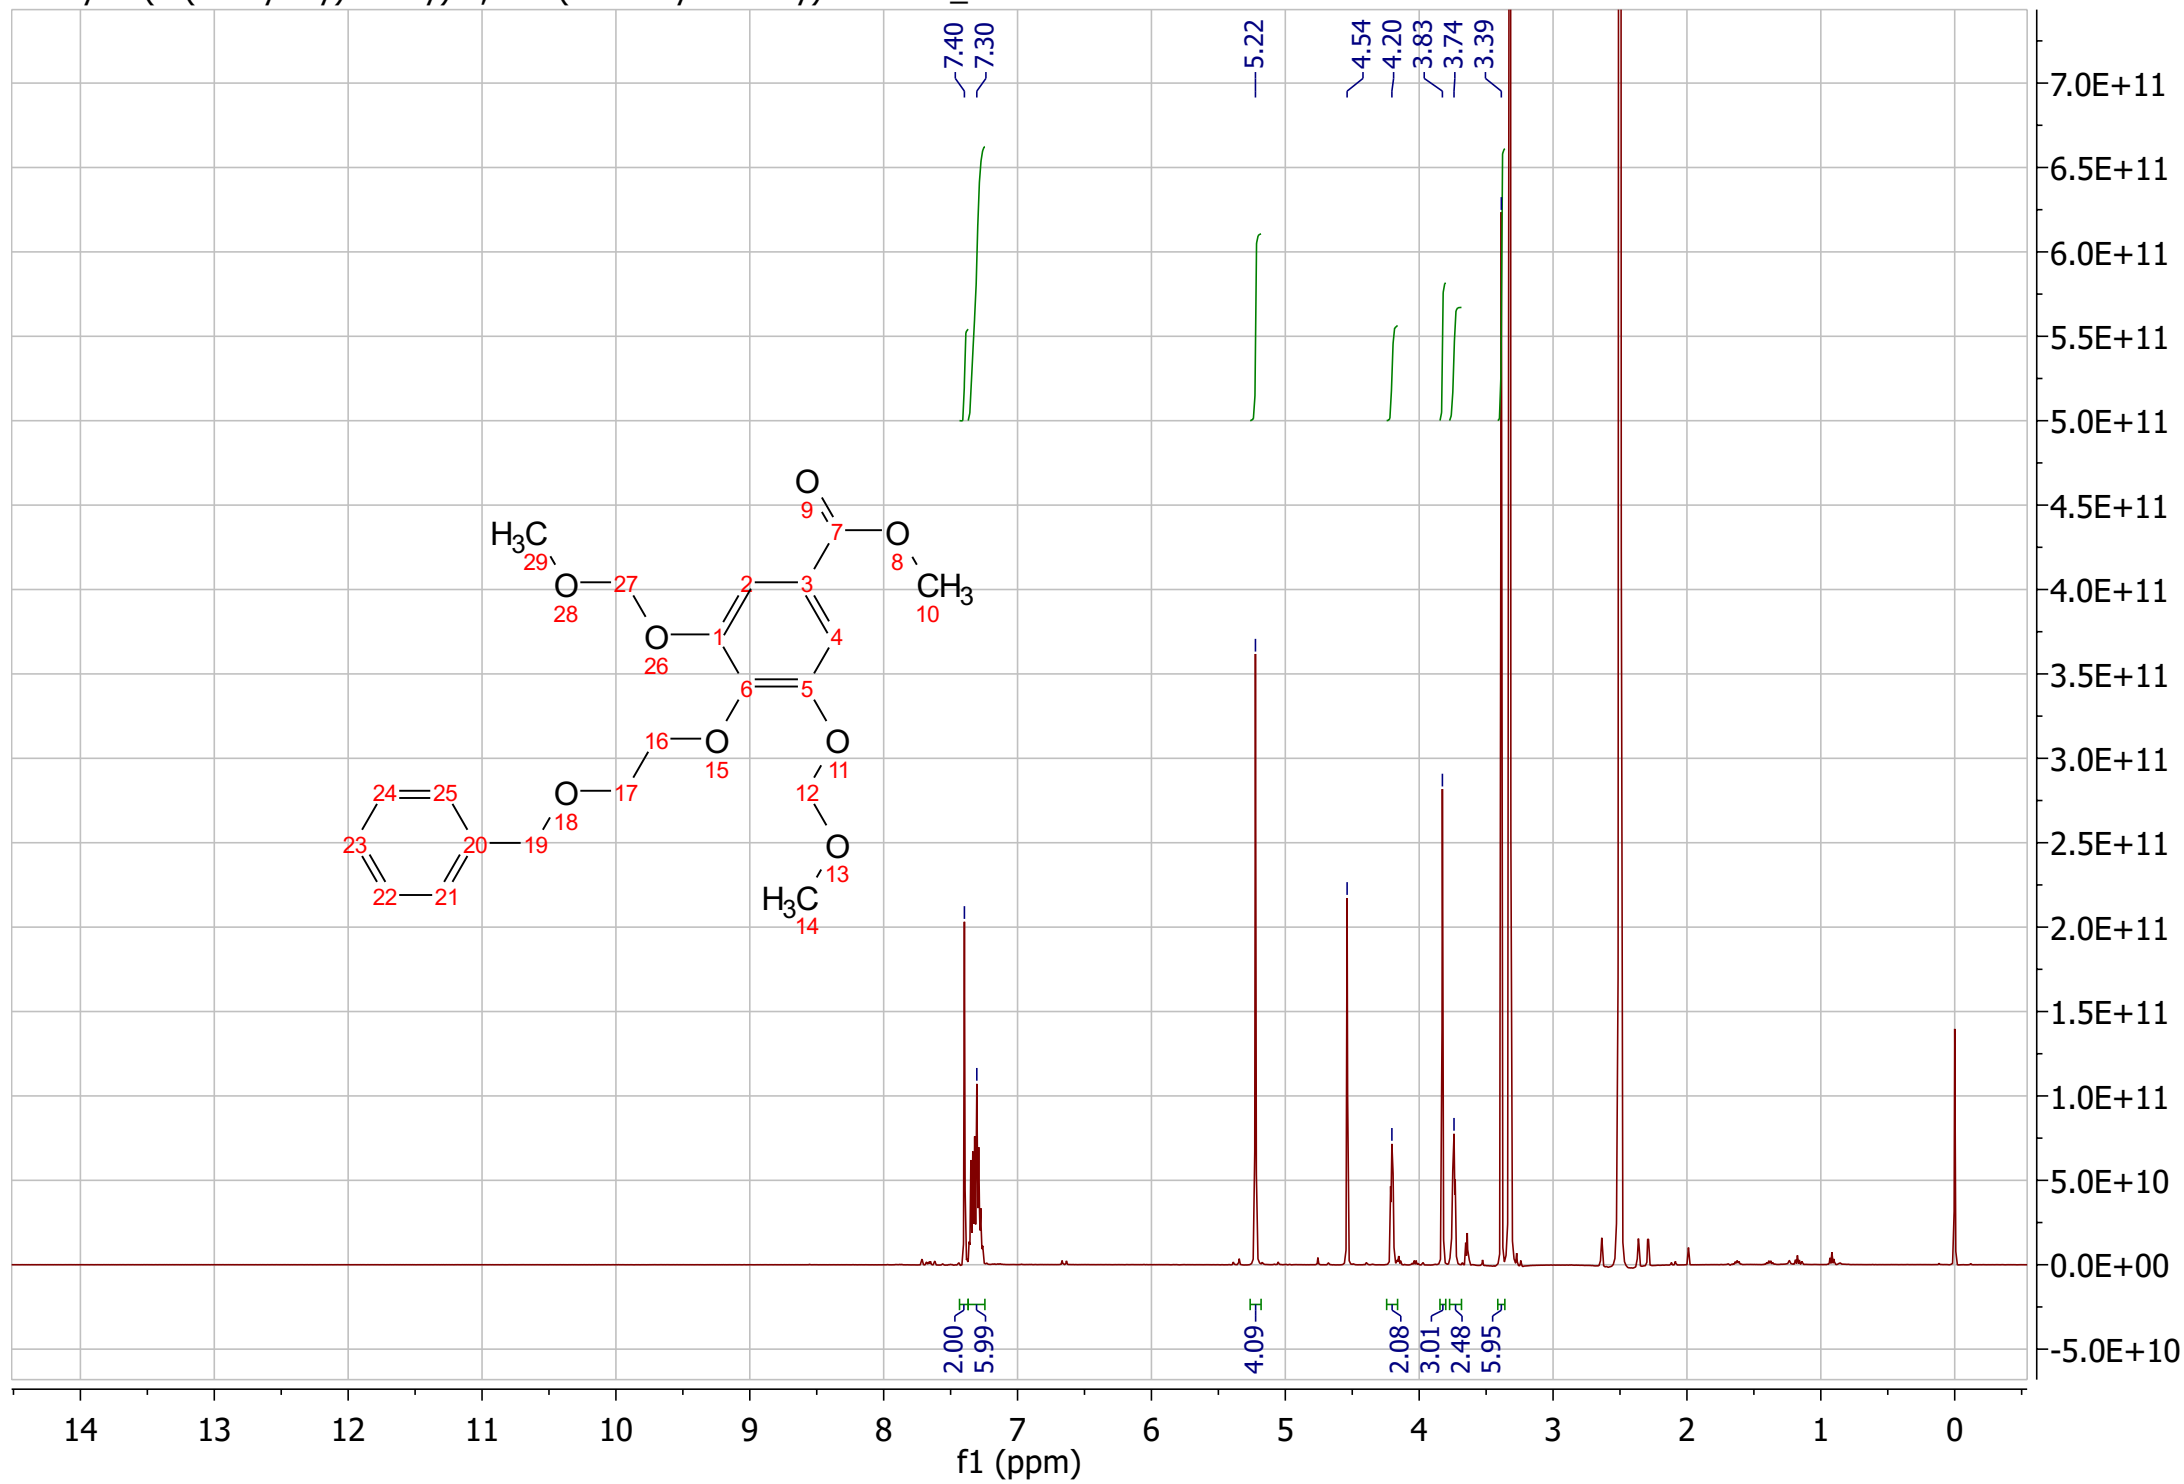

Methyl 4-(2-(benzyloxy)ethoxy)-3,5-bis(methoxy)benzoate\_DMSO

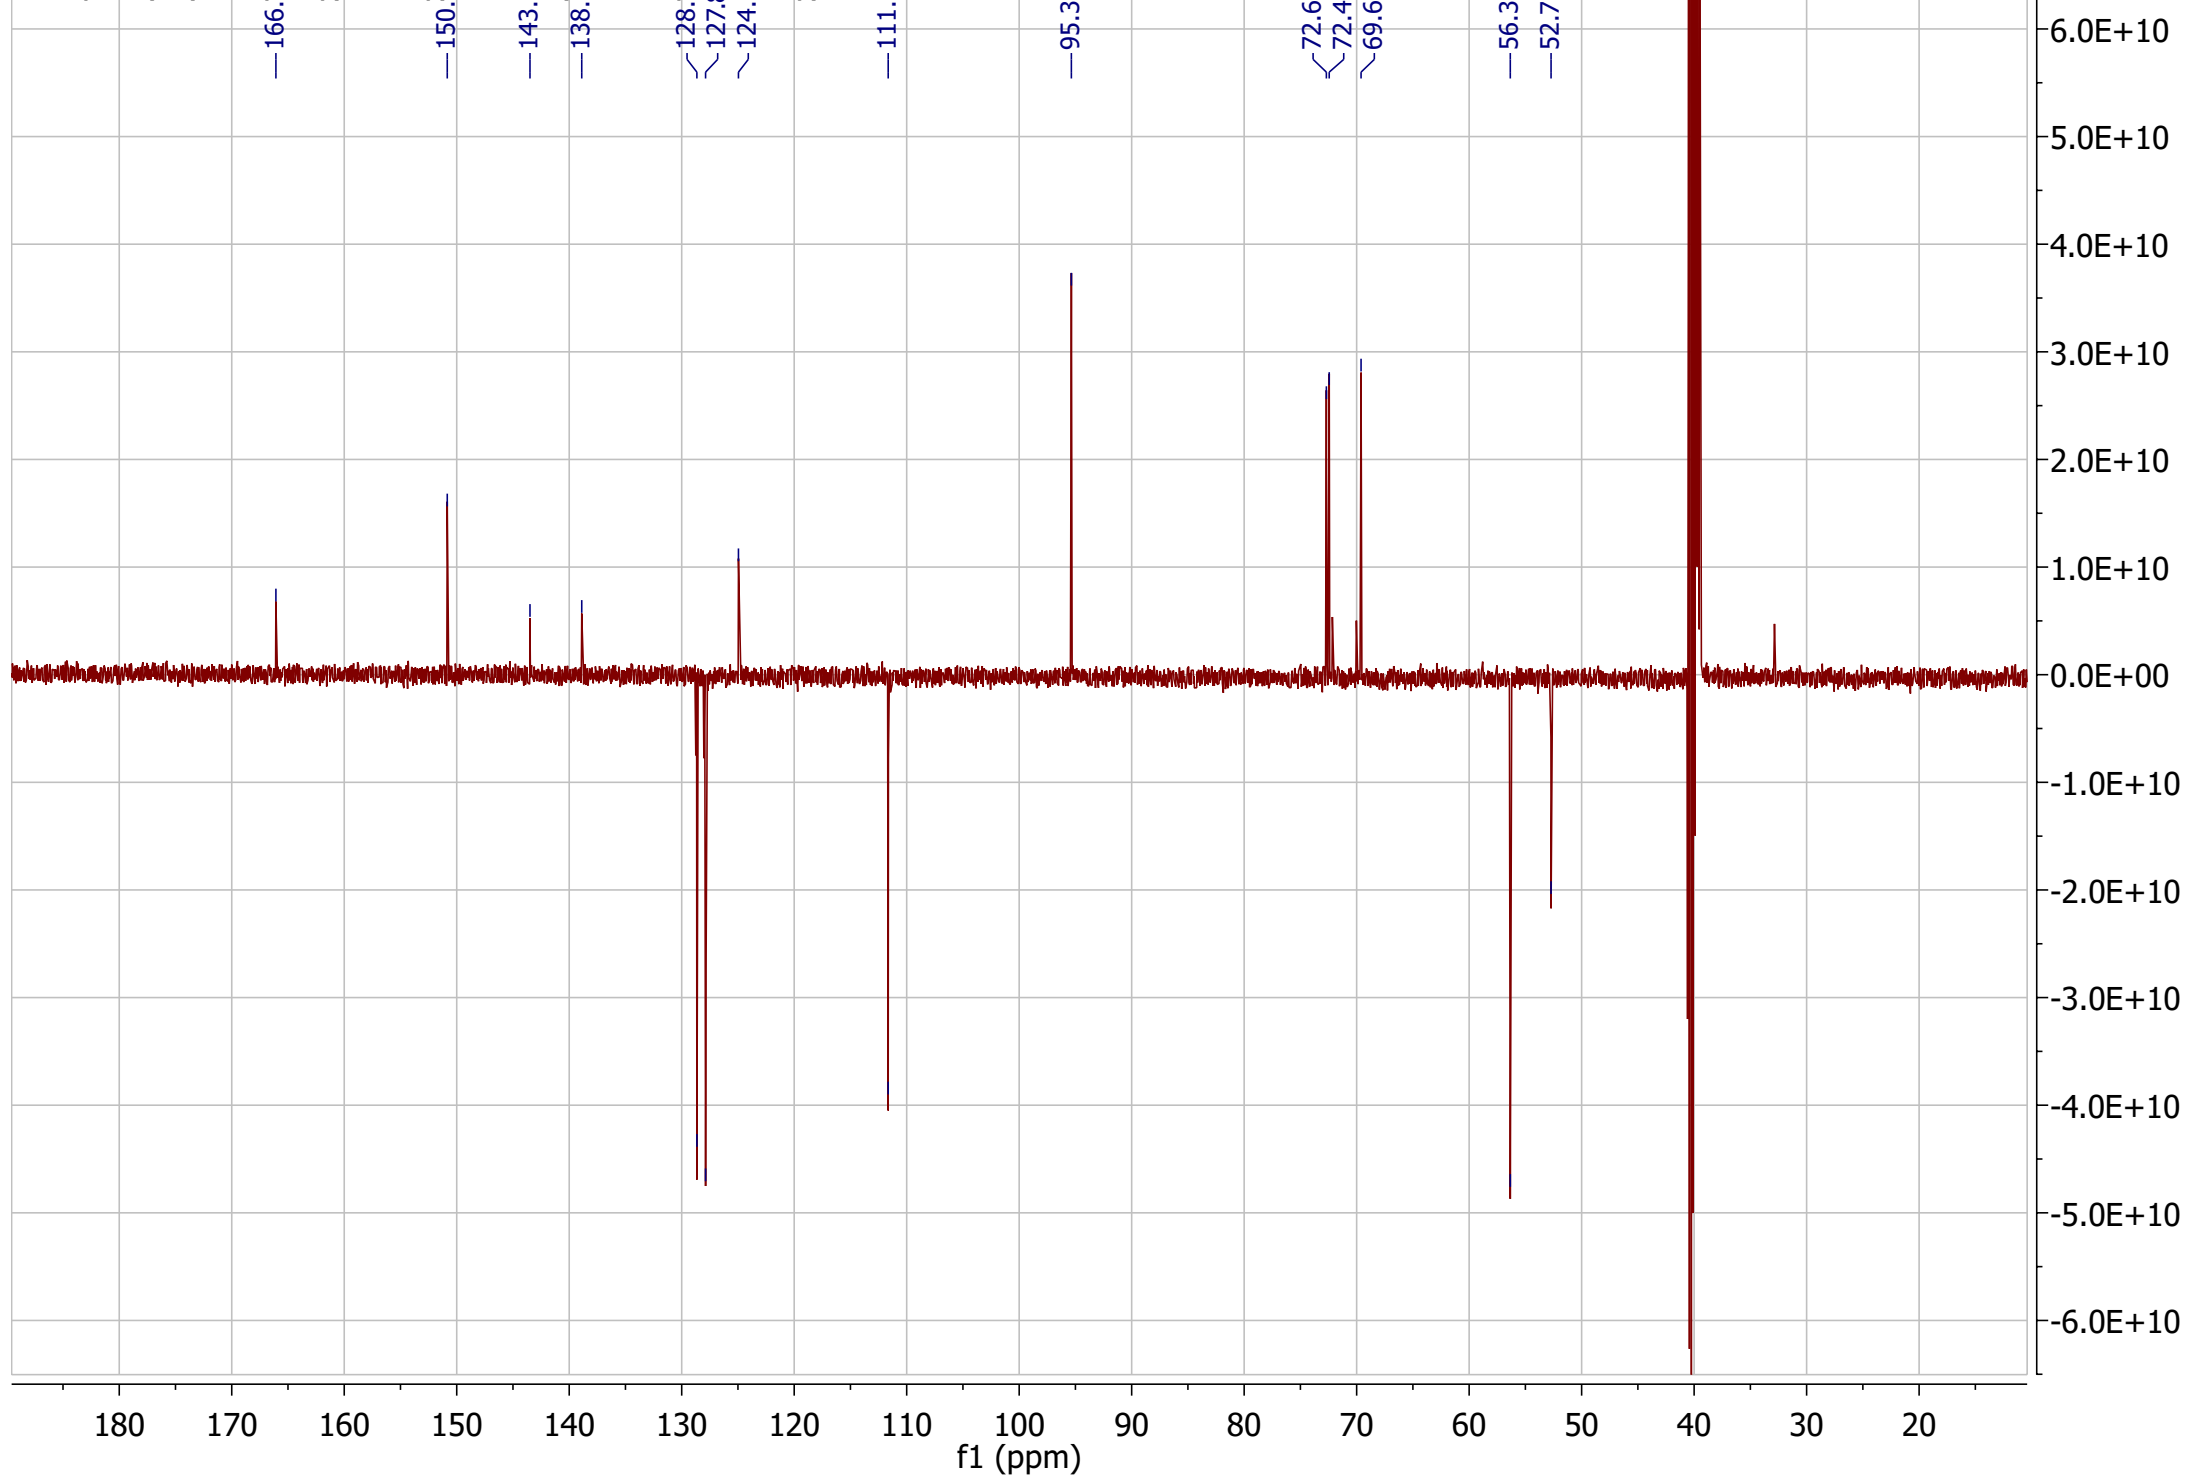

Methyl 4-(2-hydroxyethoxy)-3,5-bis(methoxymethoxy)benzoate\_DMSO

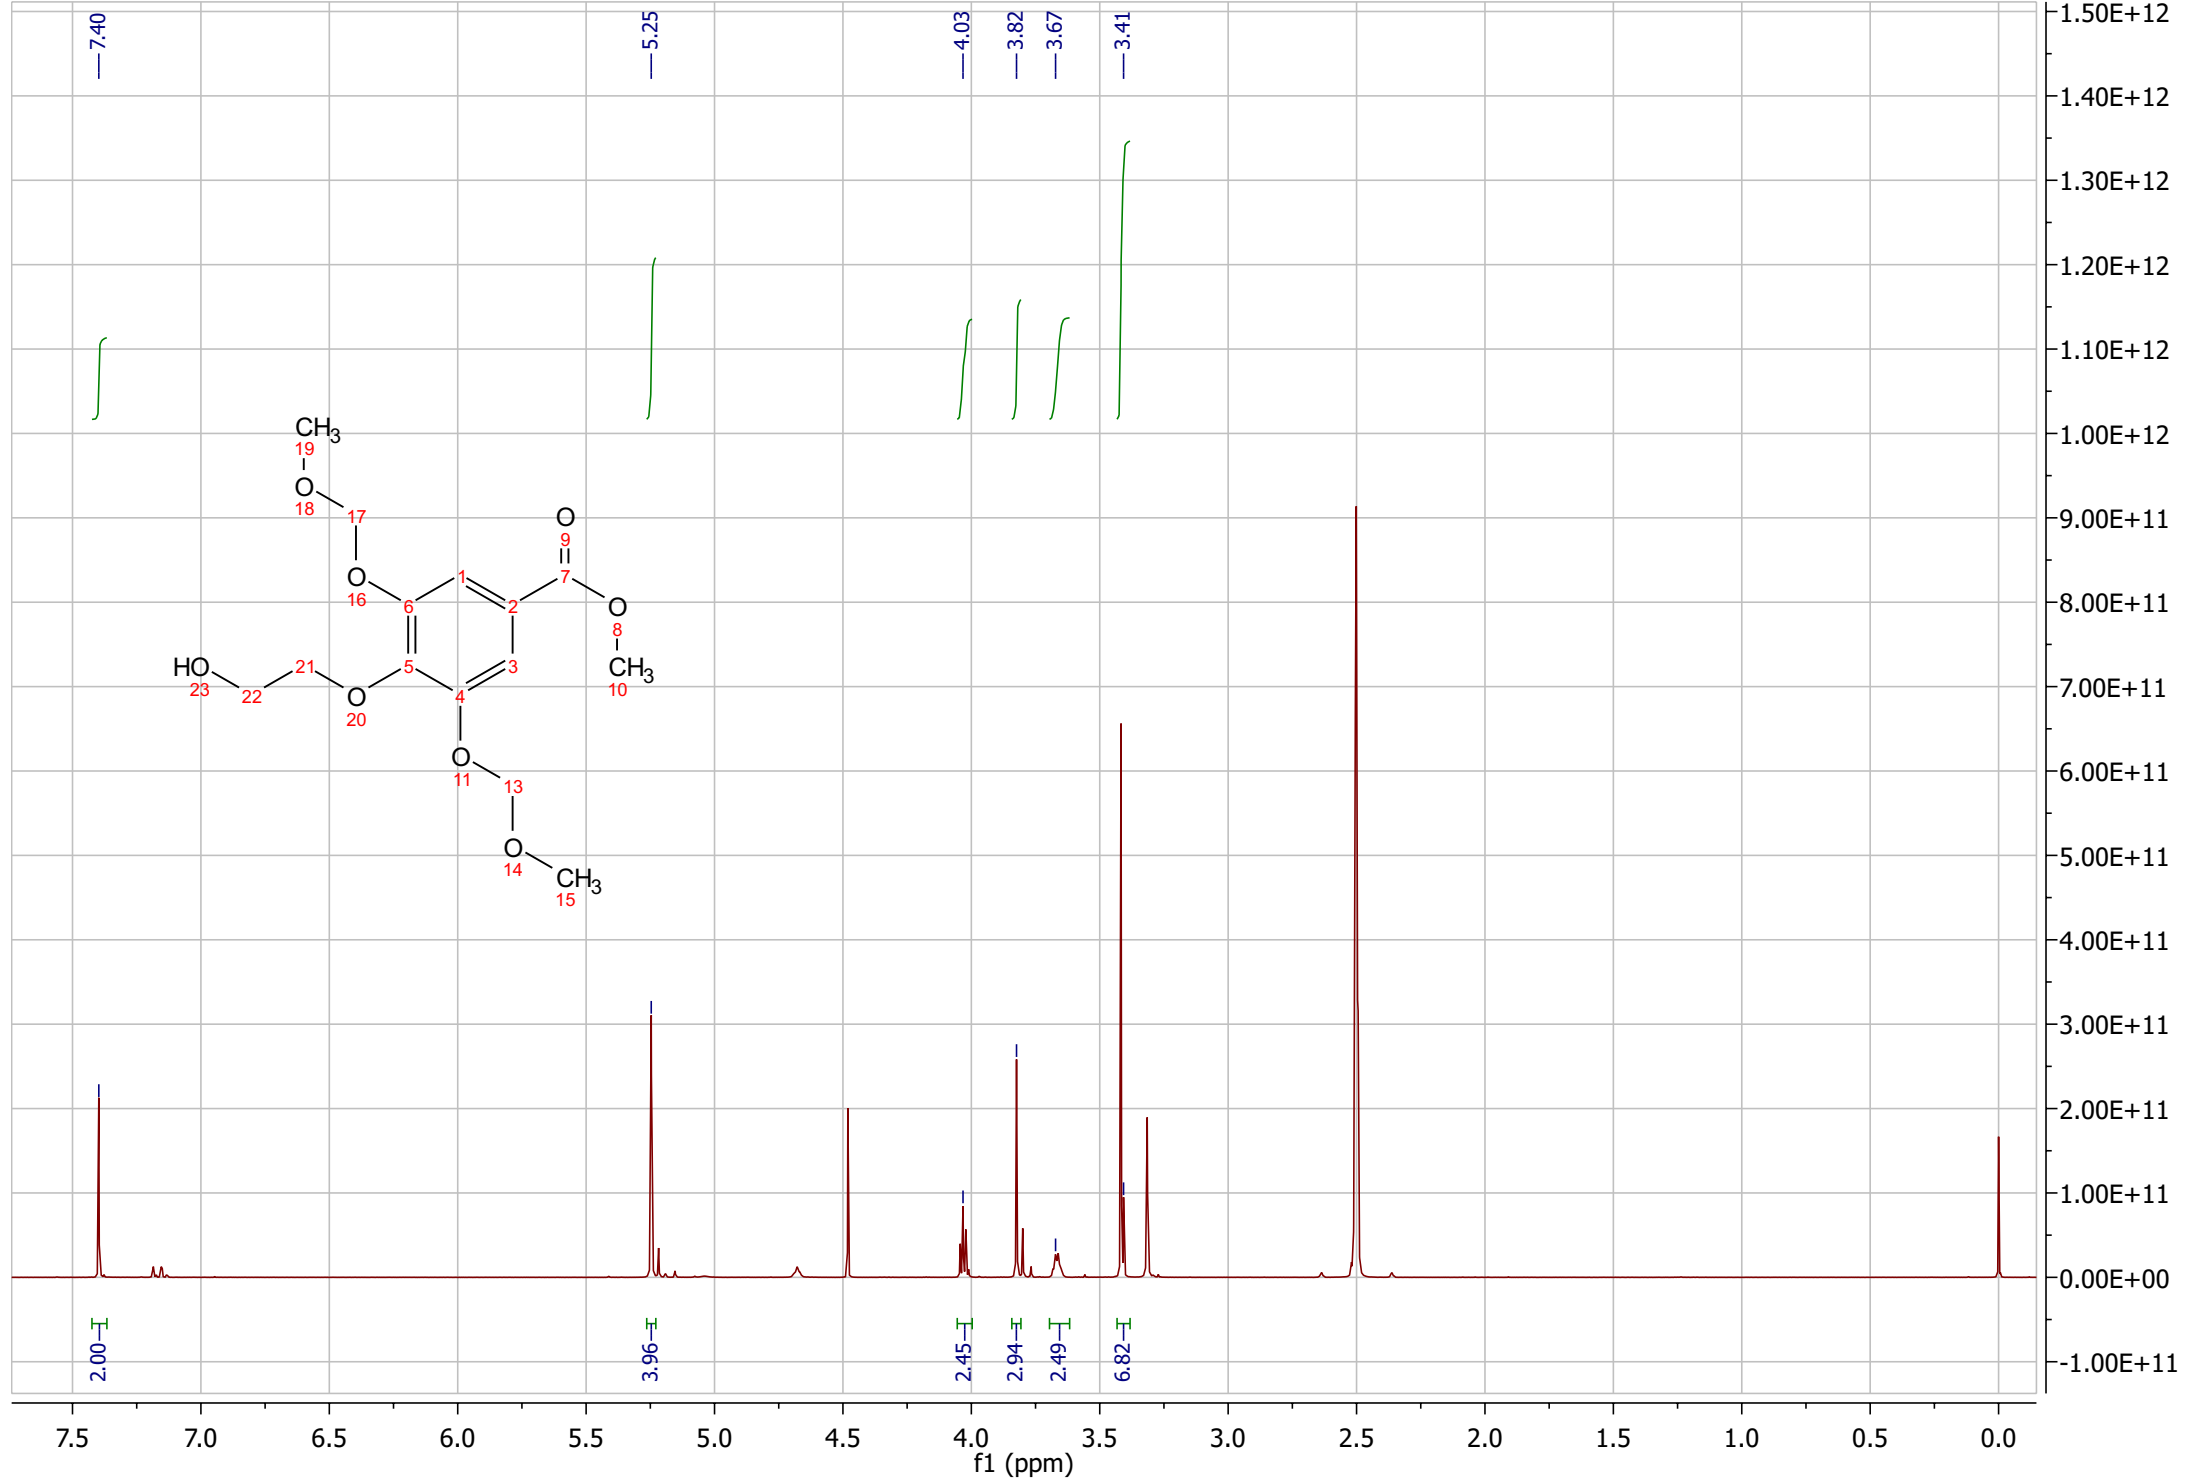

Methyl 4-(2-hydroxyethoxy)-3,5-bis(methoxymethoxy)benzoate\_DMSO

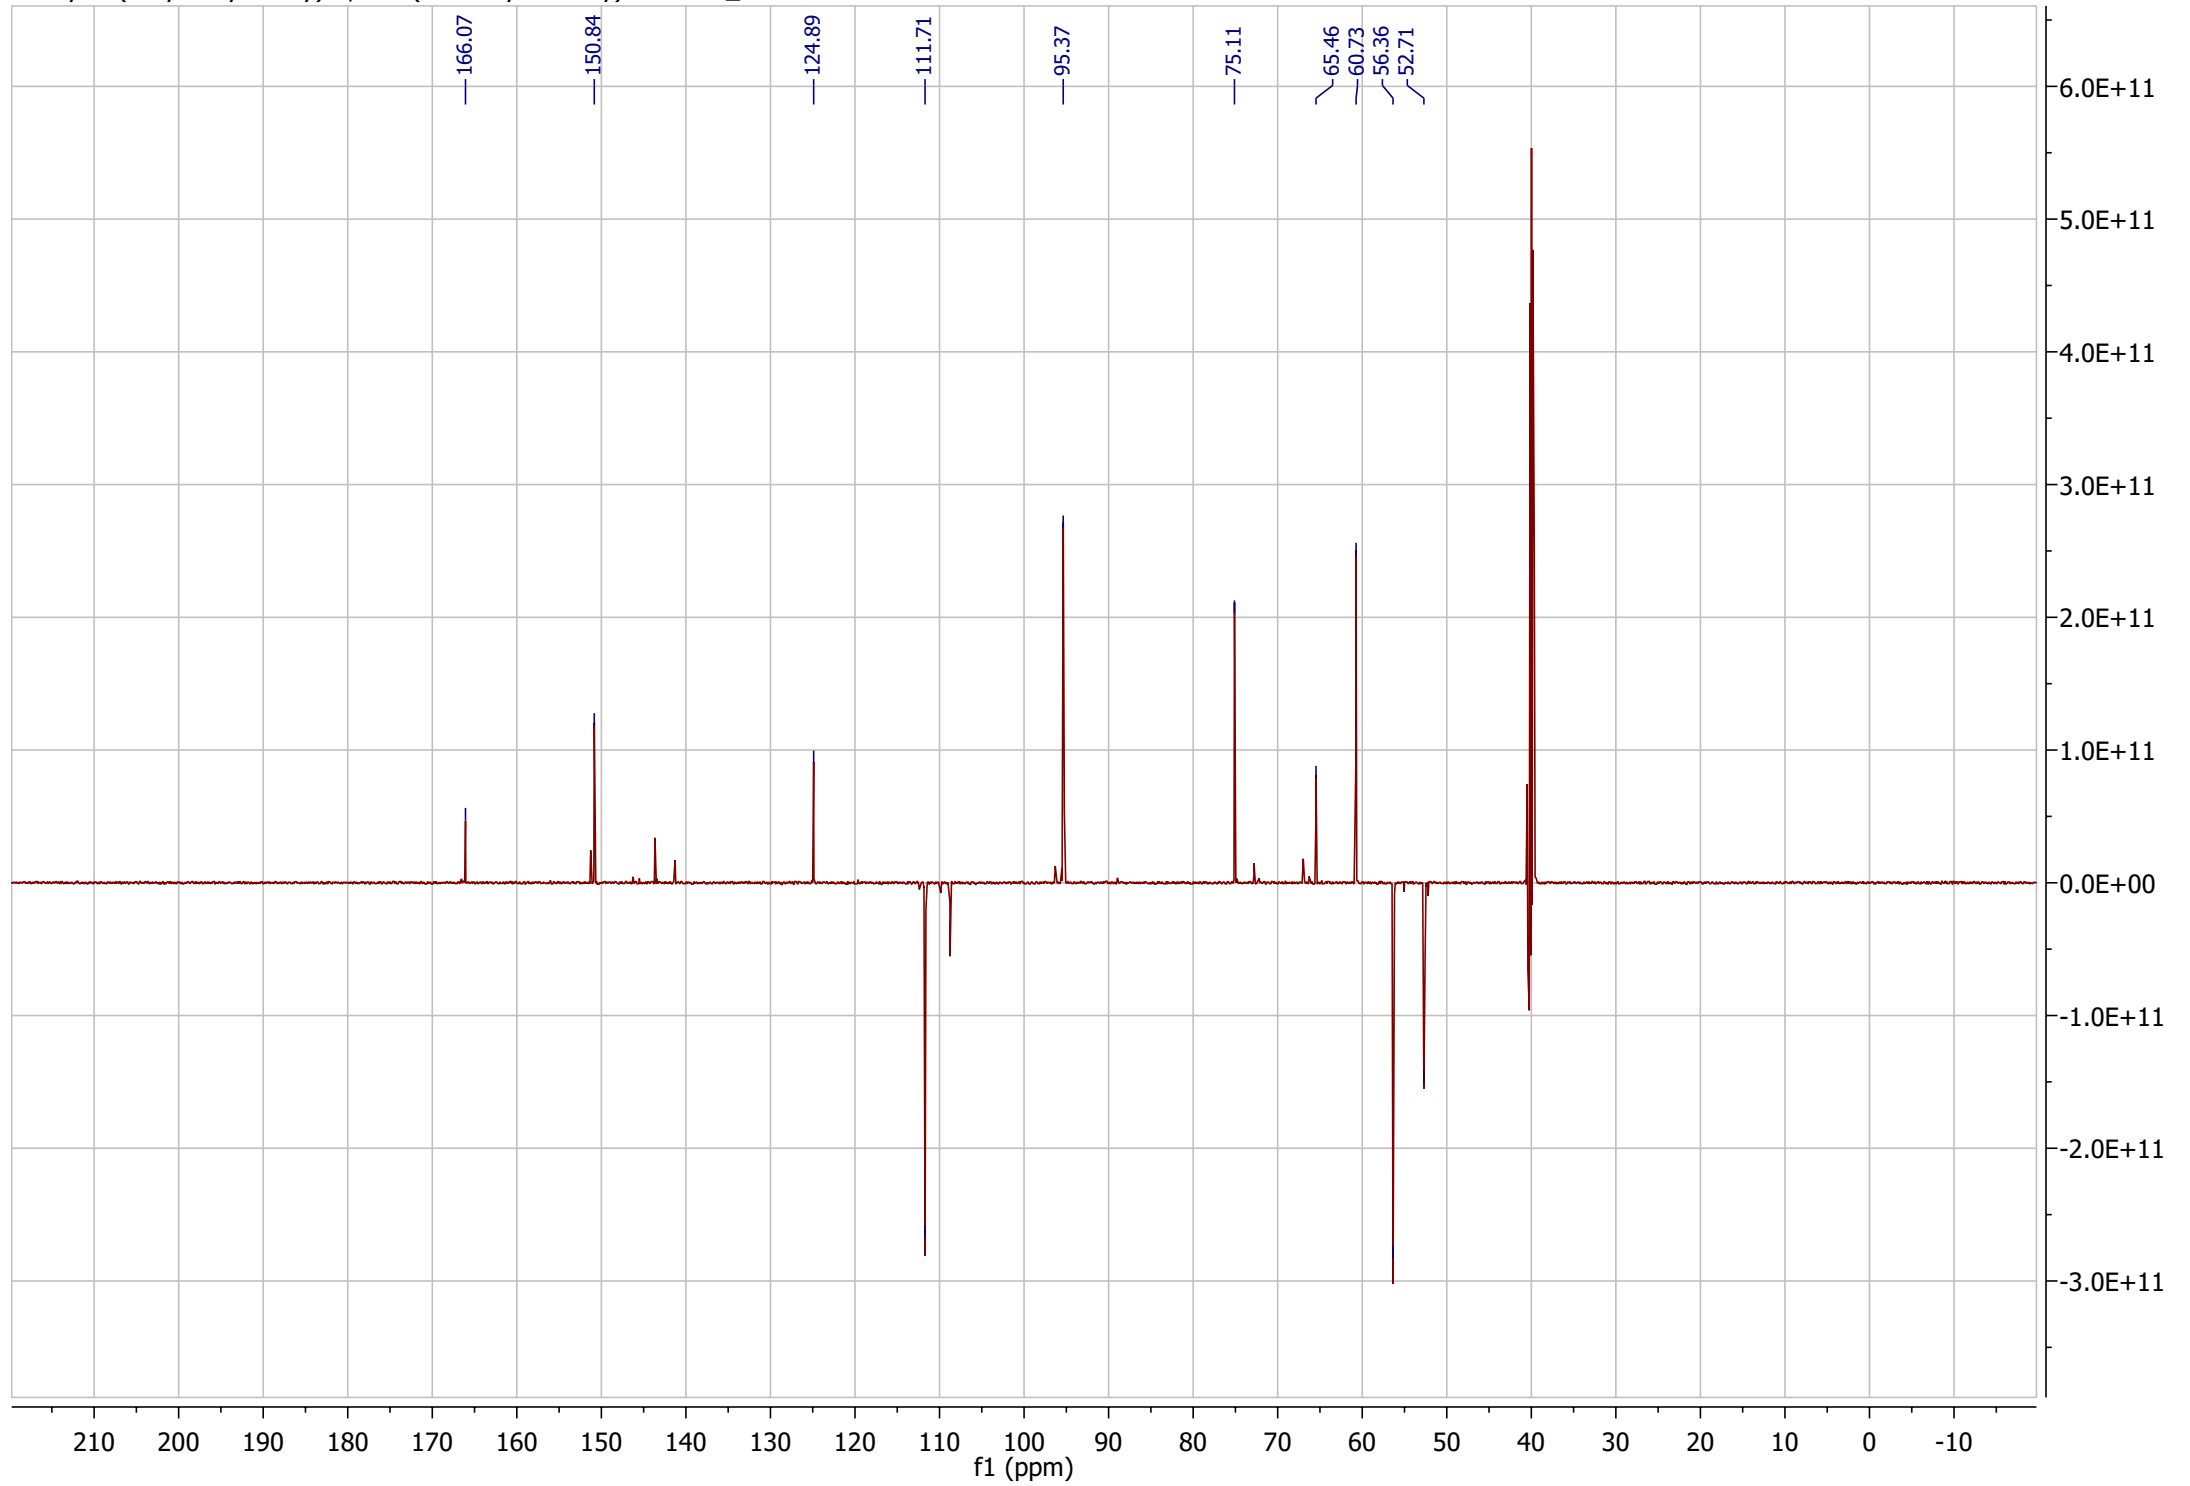

4-(benzyloxy)-3,5-bis(methoxymethoxy)benzoic acid\_DMSO

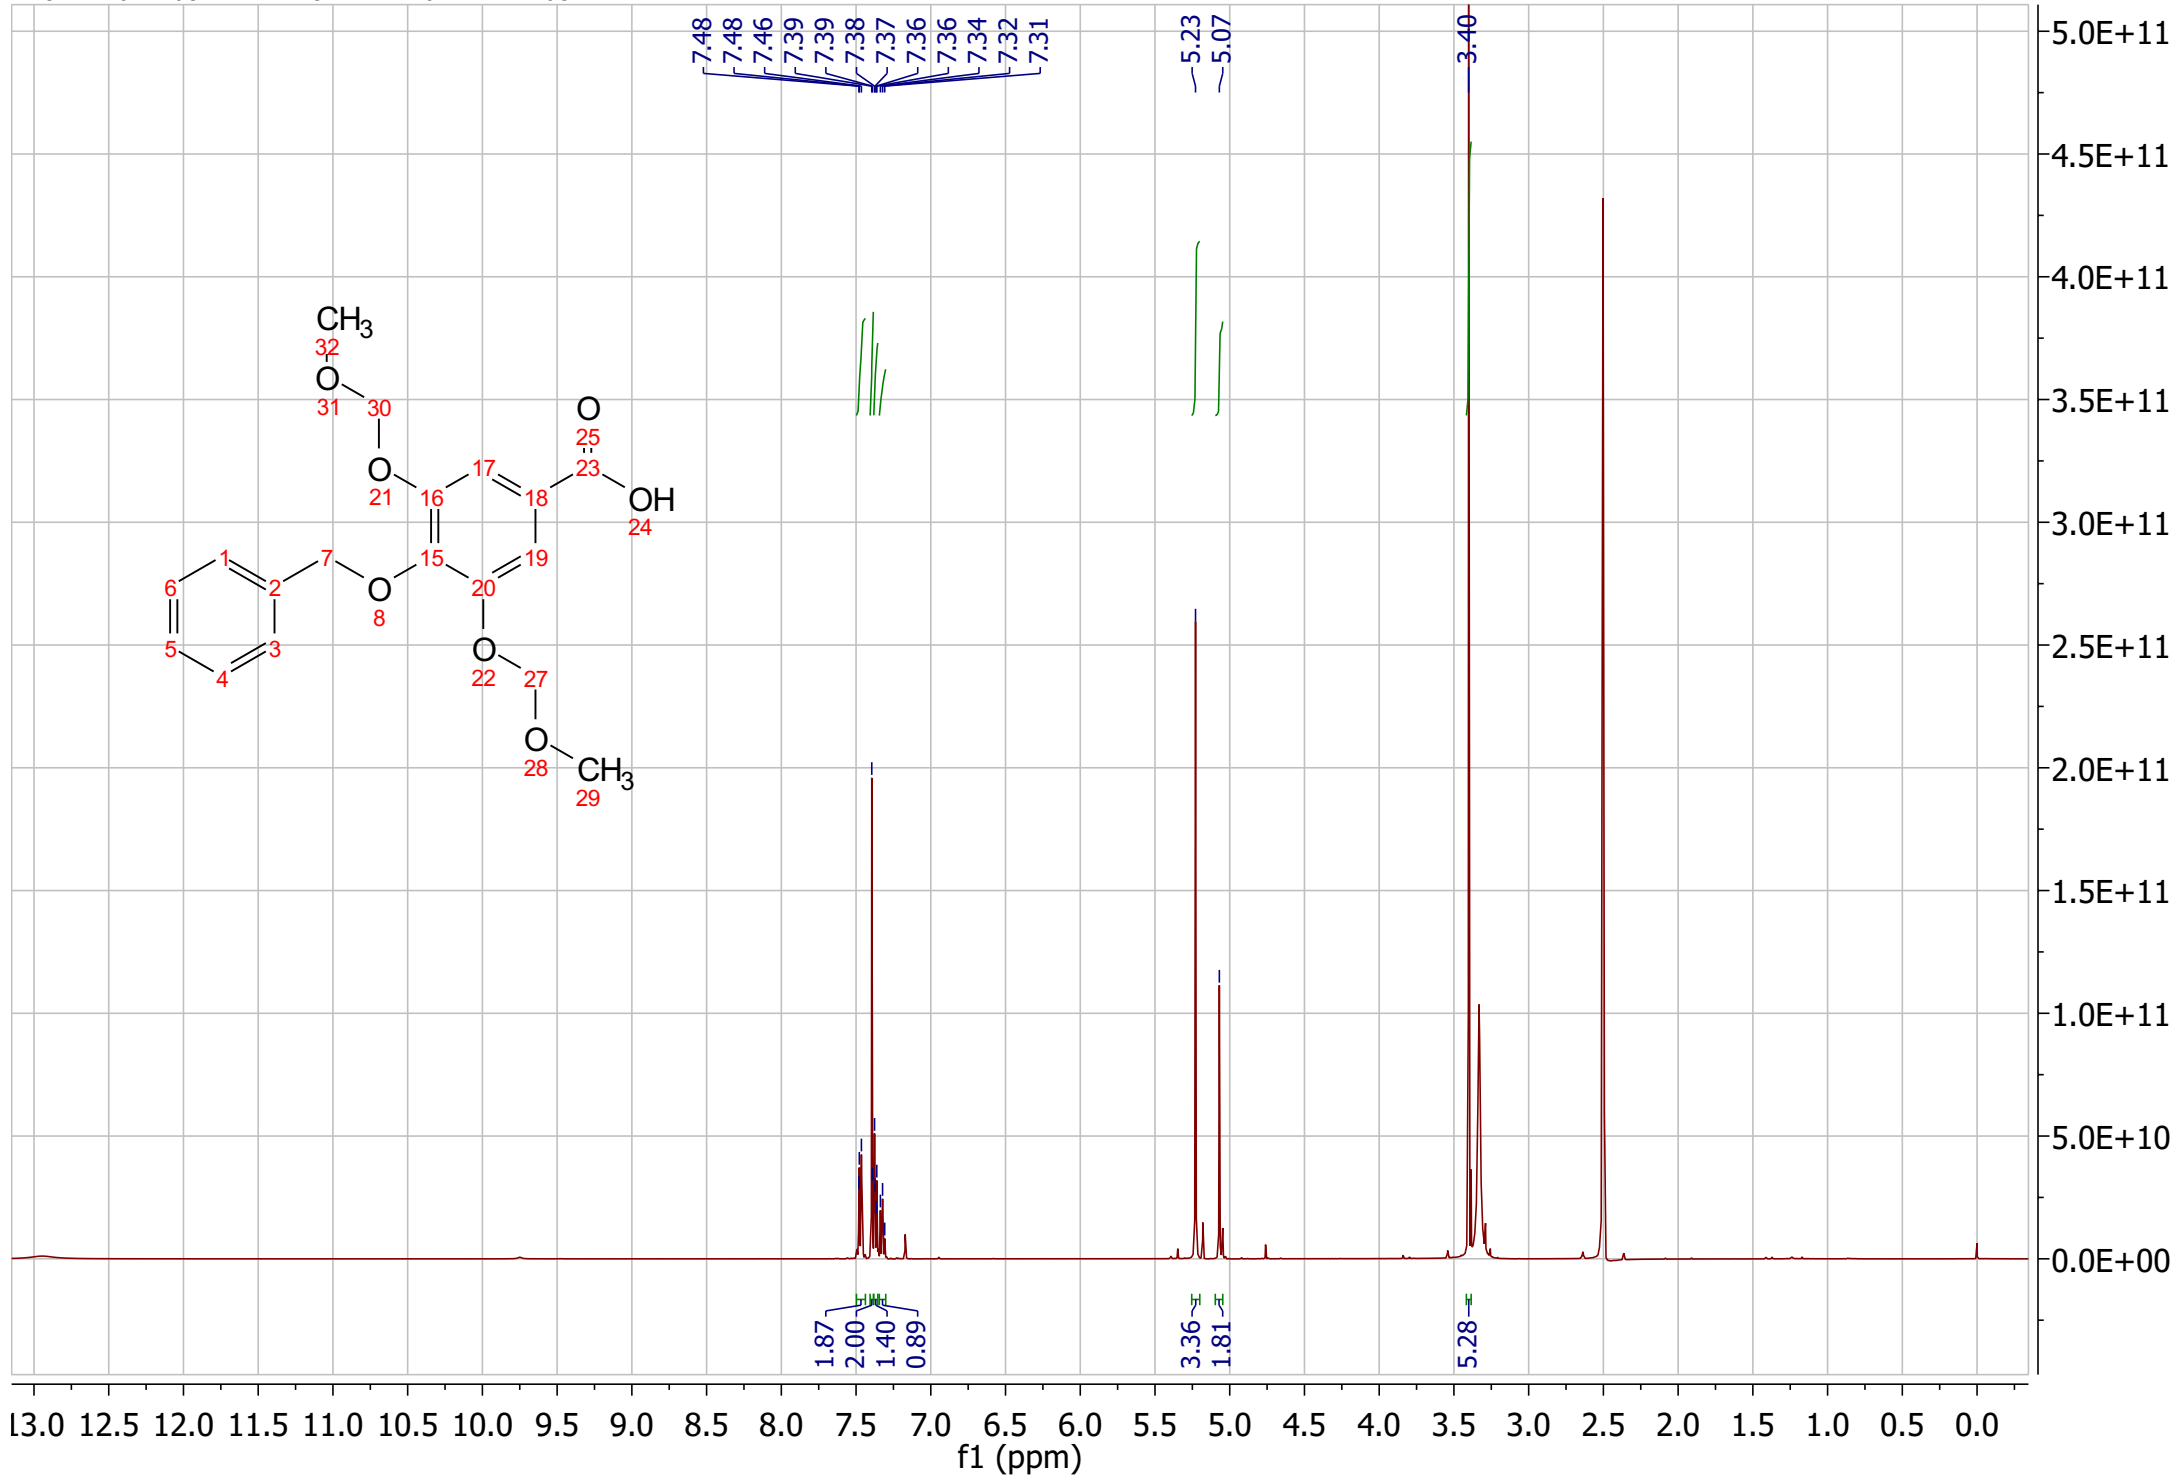



4-(benzyloxy)-3,5-bis(methoxymethoxy)benzoic acid\_DMSO

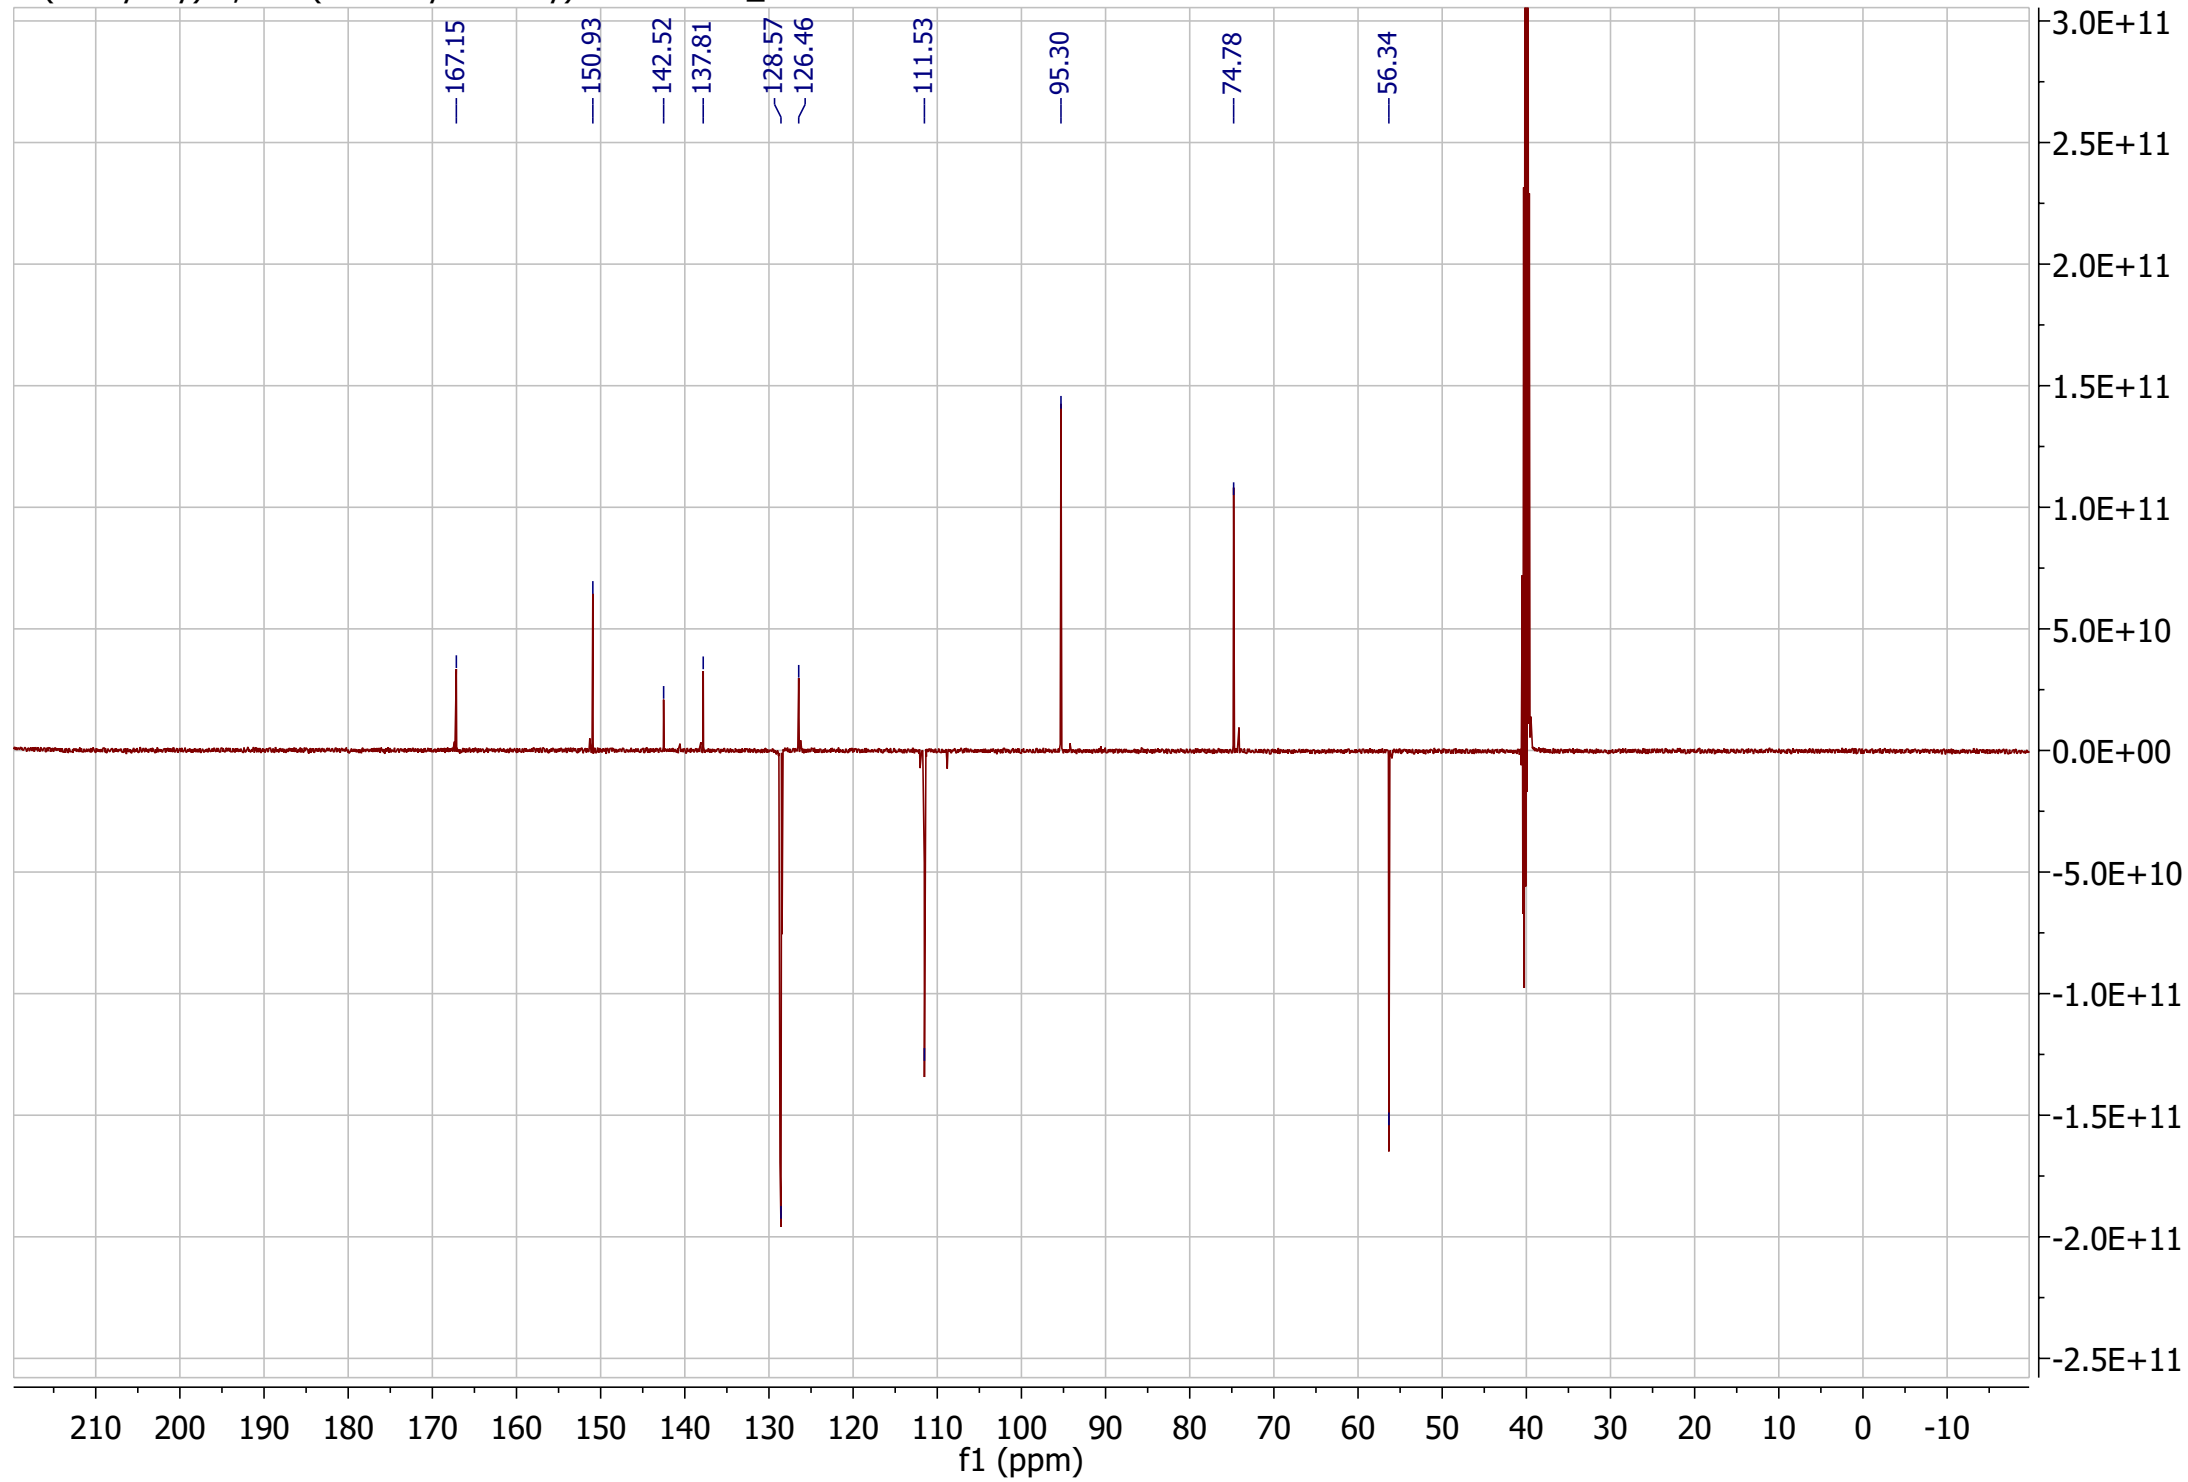

4-(benzyloxy)-3,5-bis(methoxymethoxy)benzoic acid\_DMSO

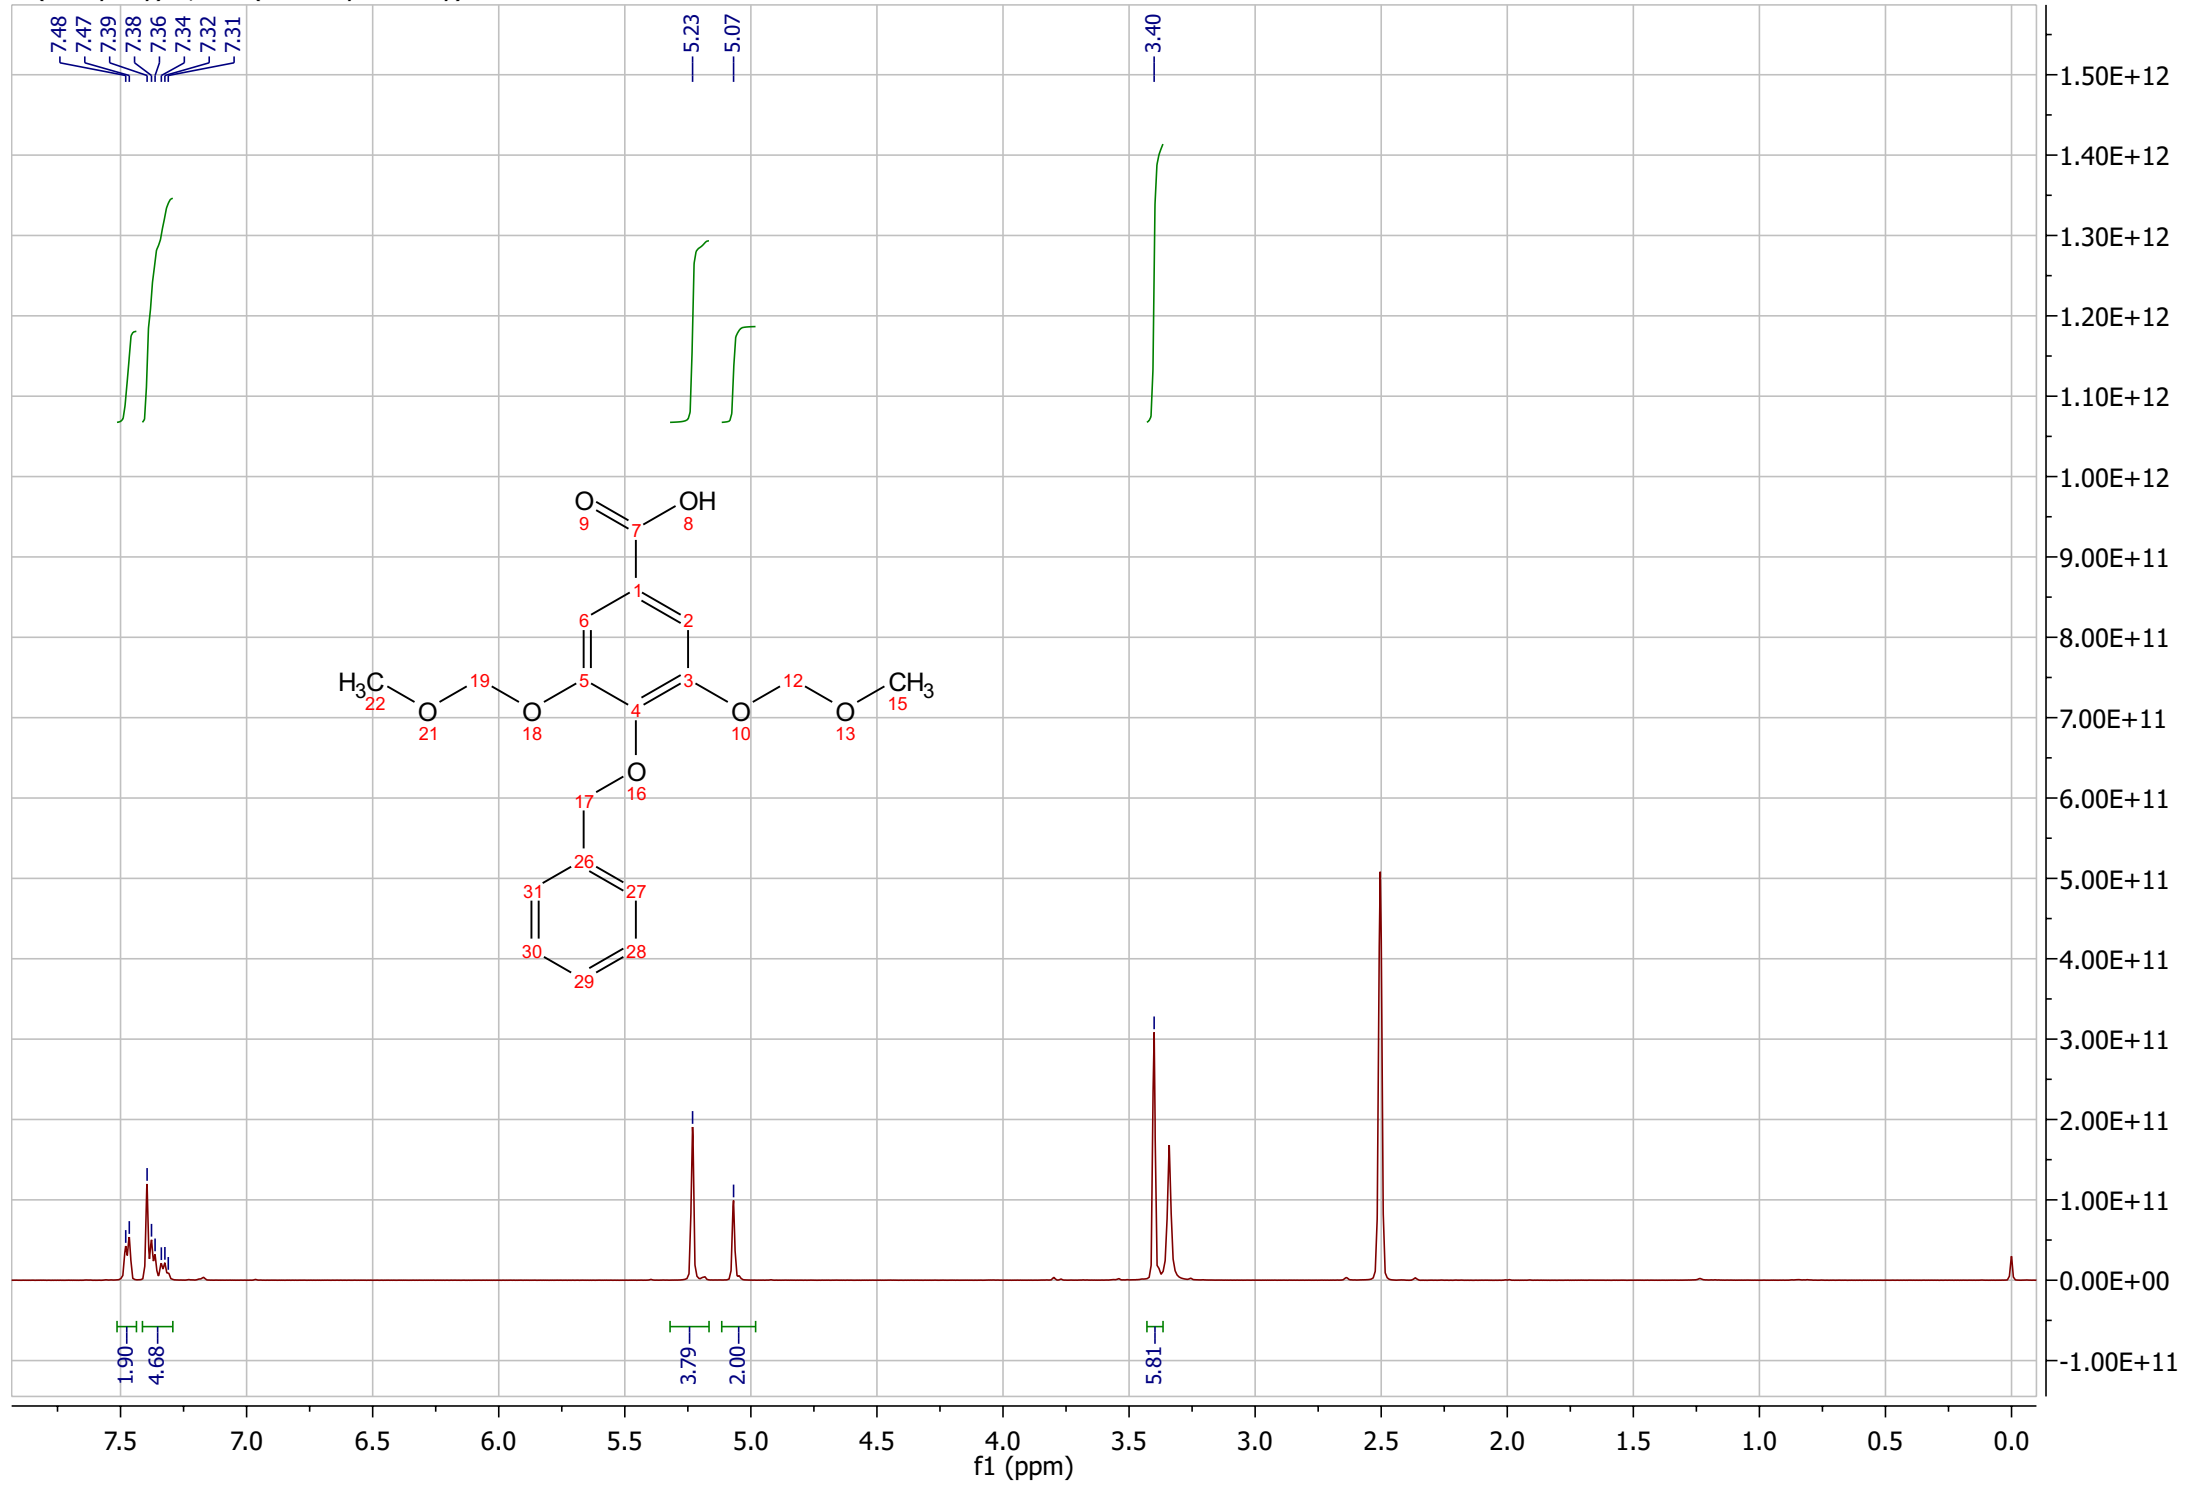

3,5-bis(methoxymethoxy)-4-(naphth-2-ylmethoxy)benzoic acid\_DMSO

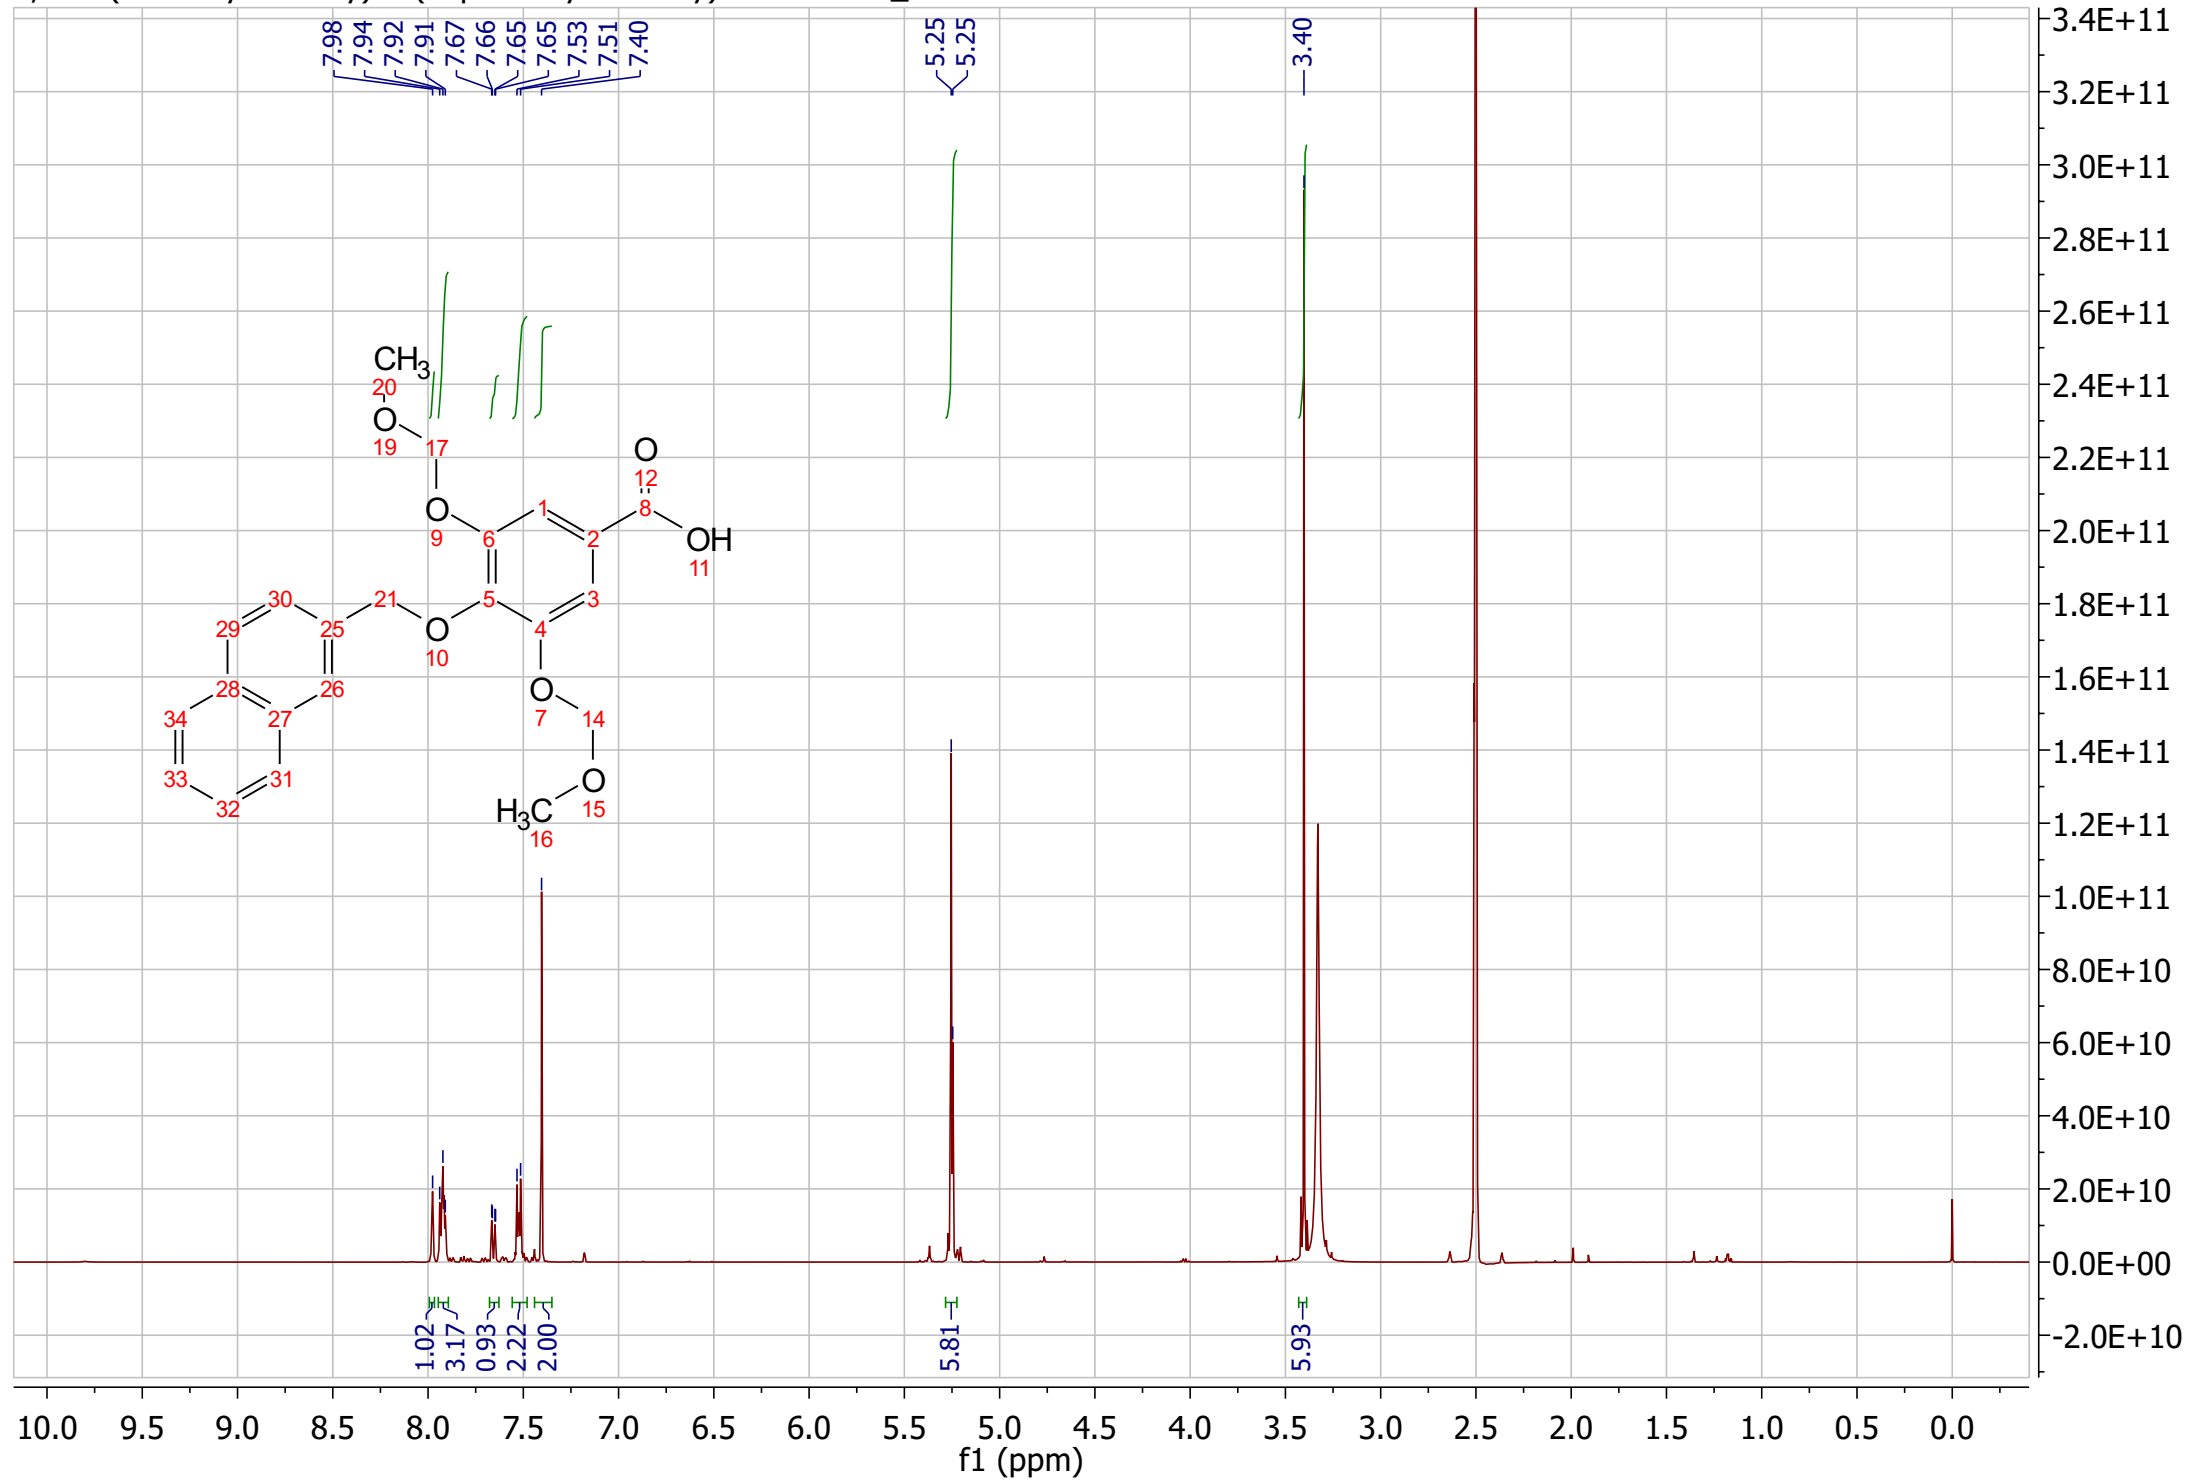

3,5-bis(methoxymethoxy)-4-(naphth-2-ylmethoxy)benzoic acid\_DMSO

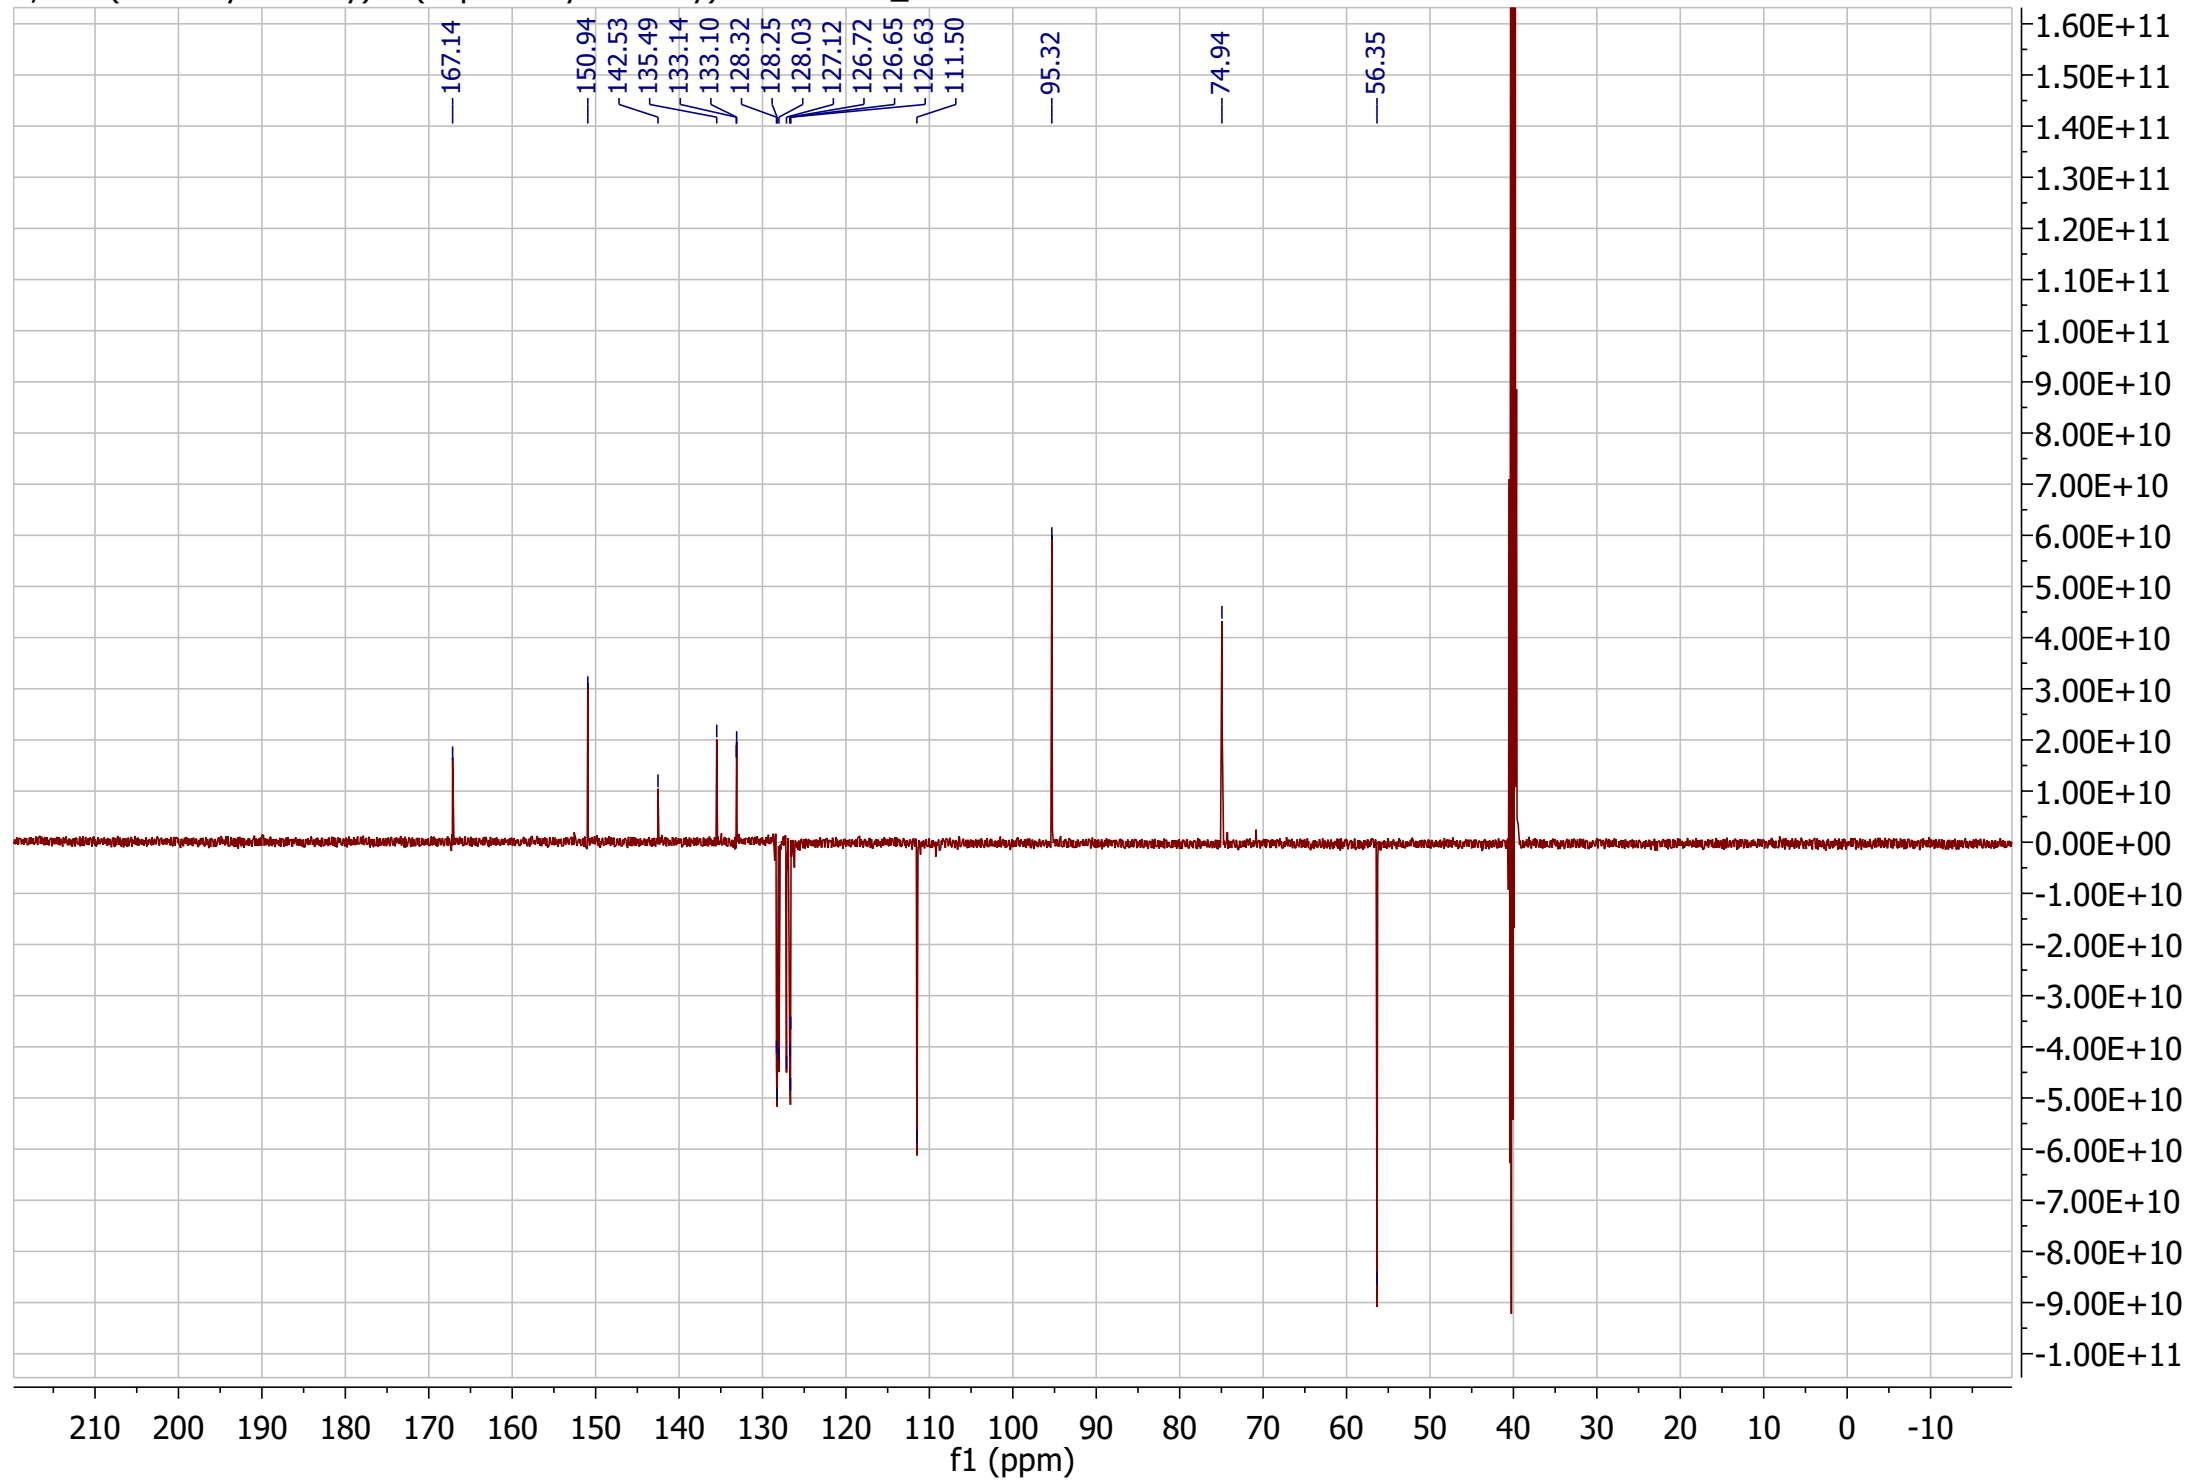

4-((4-methoxybenzyl)oxy)-3,5-bis(methoxymethoxy)benzoic acid\_MeOD

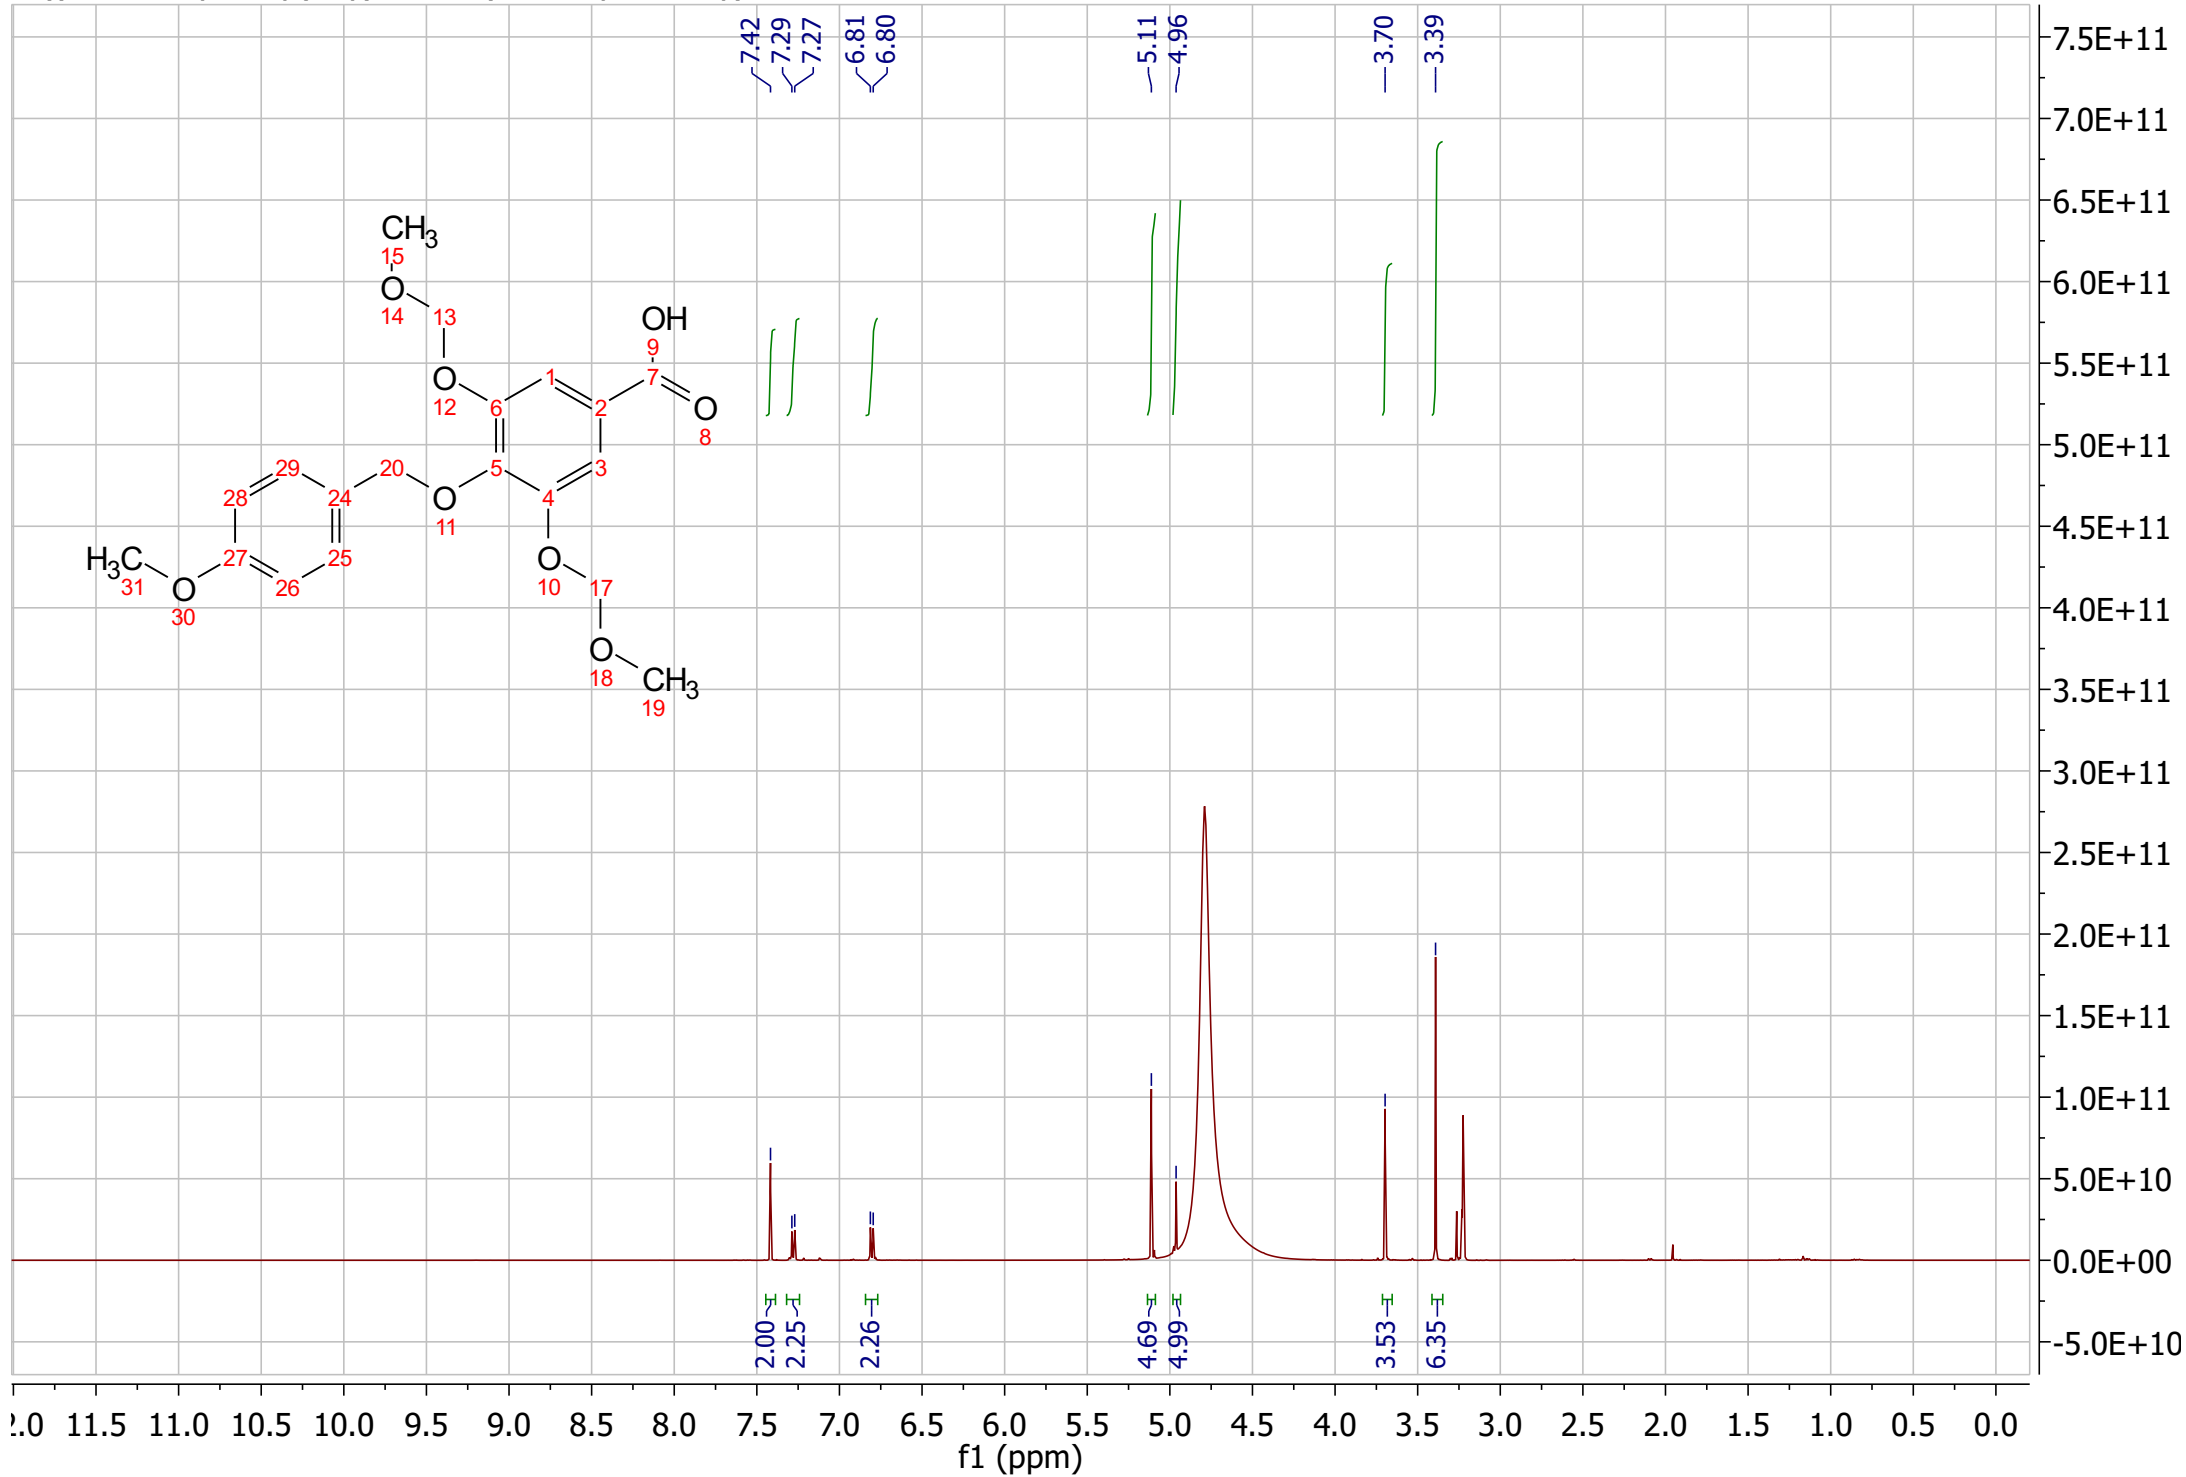

3,5-bis(methoxymethoxy)-4-(2-morpholinoethoxy)benzoic acid\_DMSO

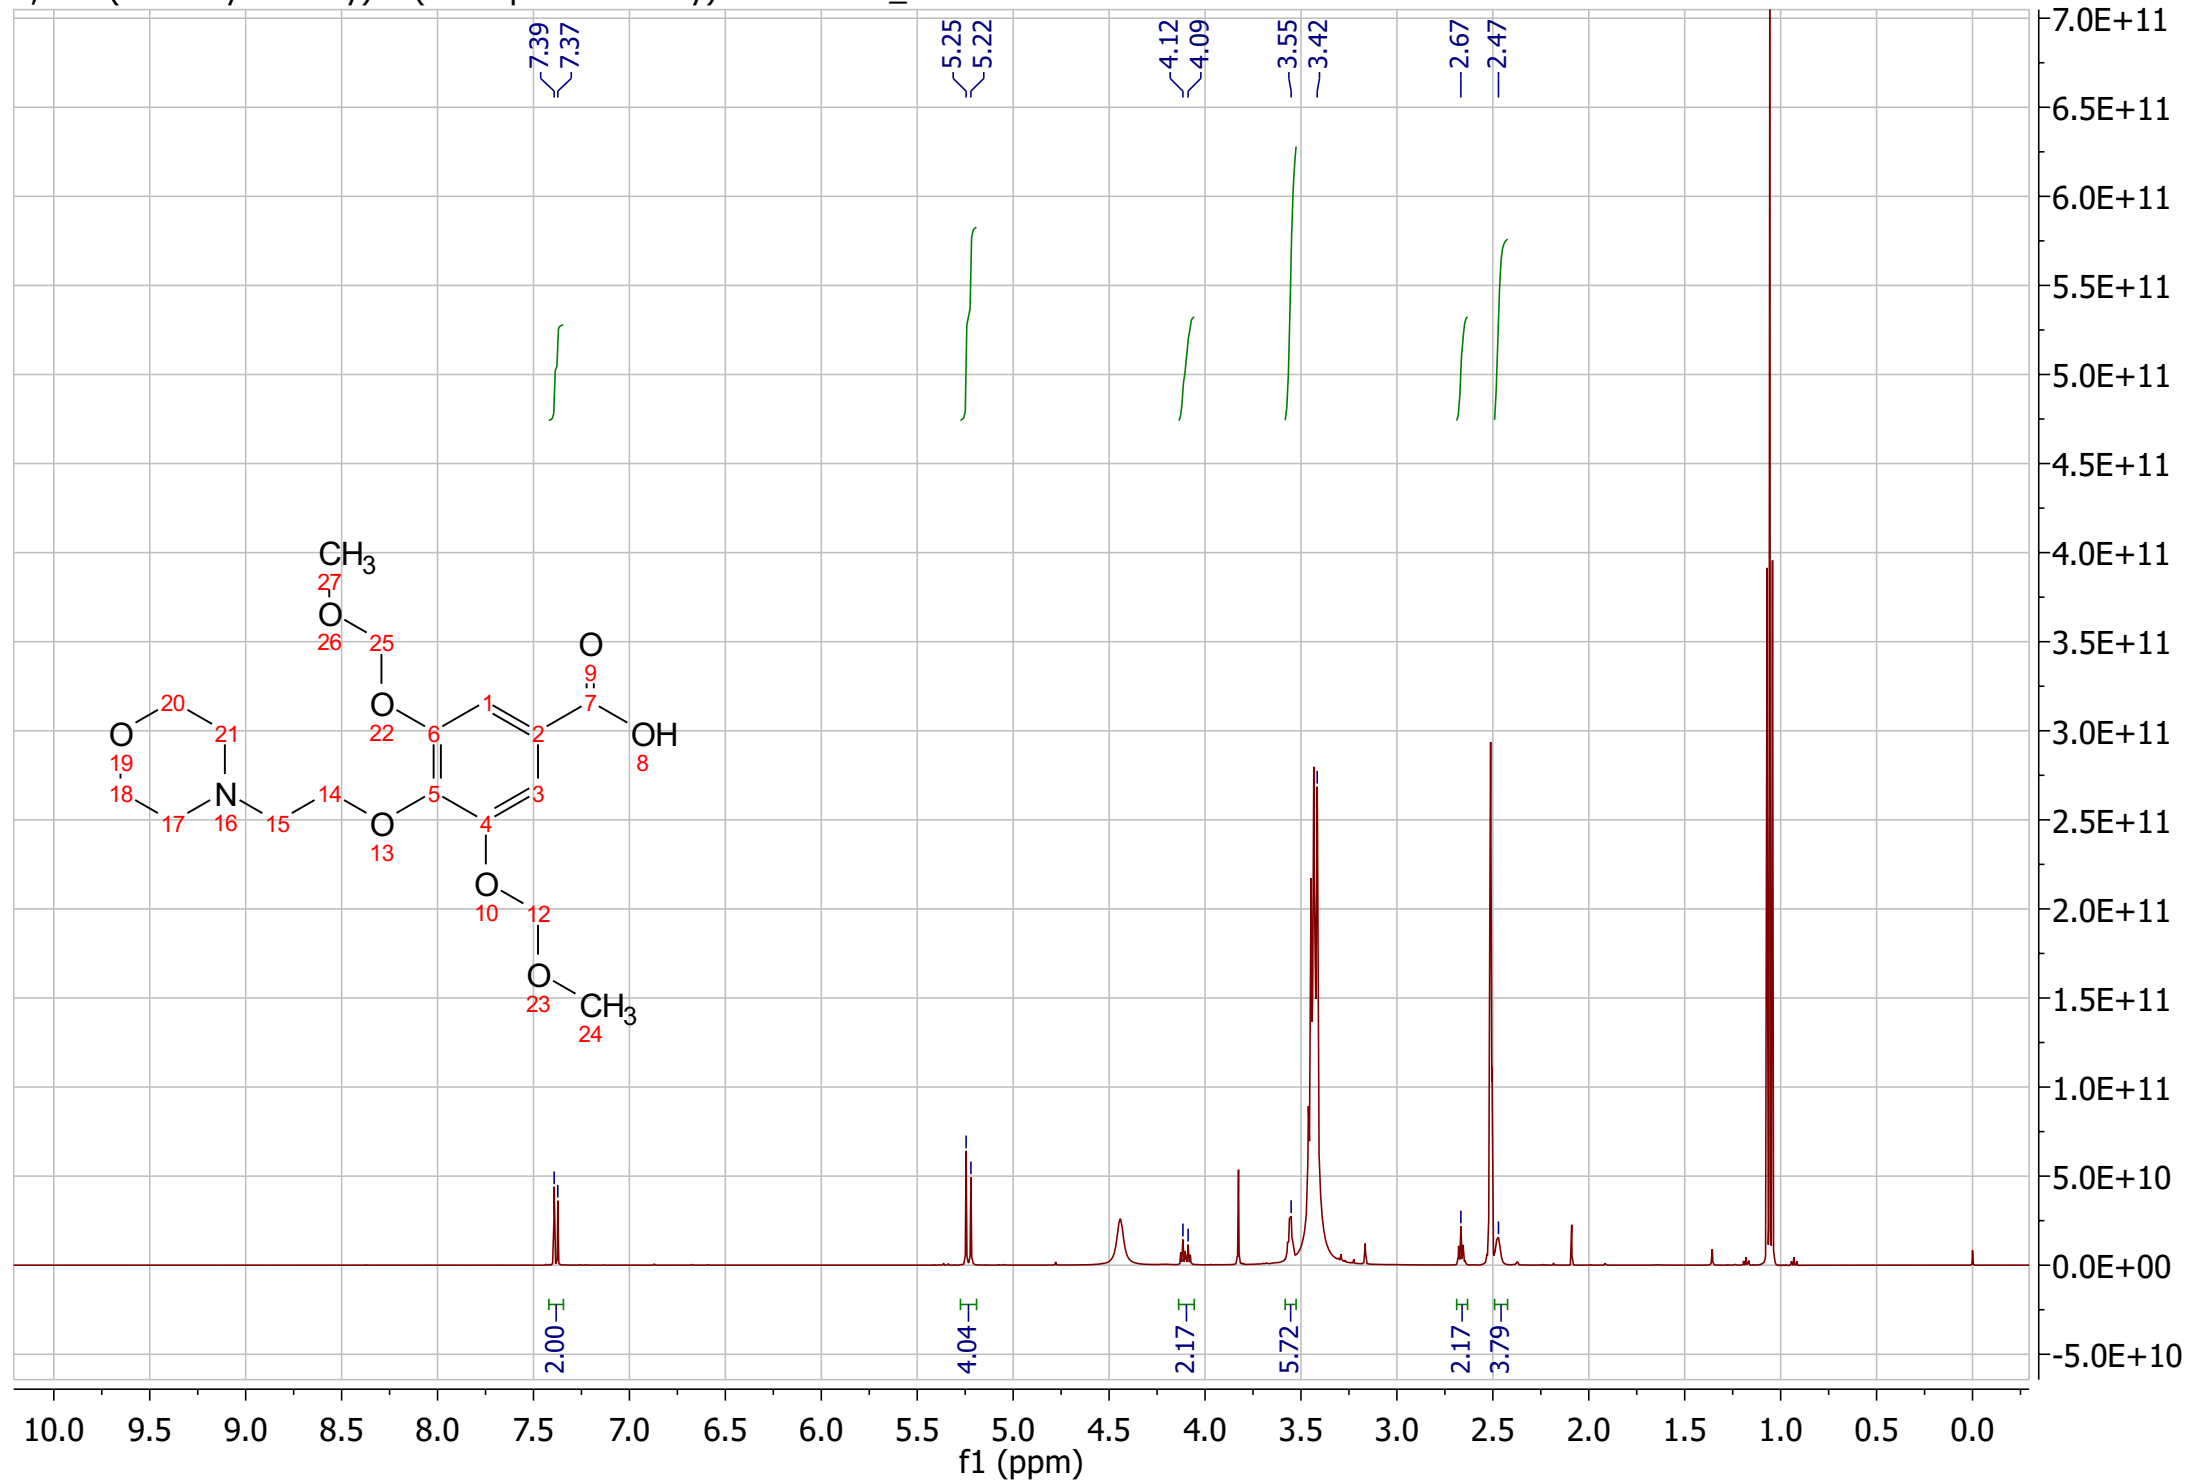

3,5-bis(methoxymethoxy)-4-(2-morpholinoethoxy)benzoic acid\_DMSO

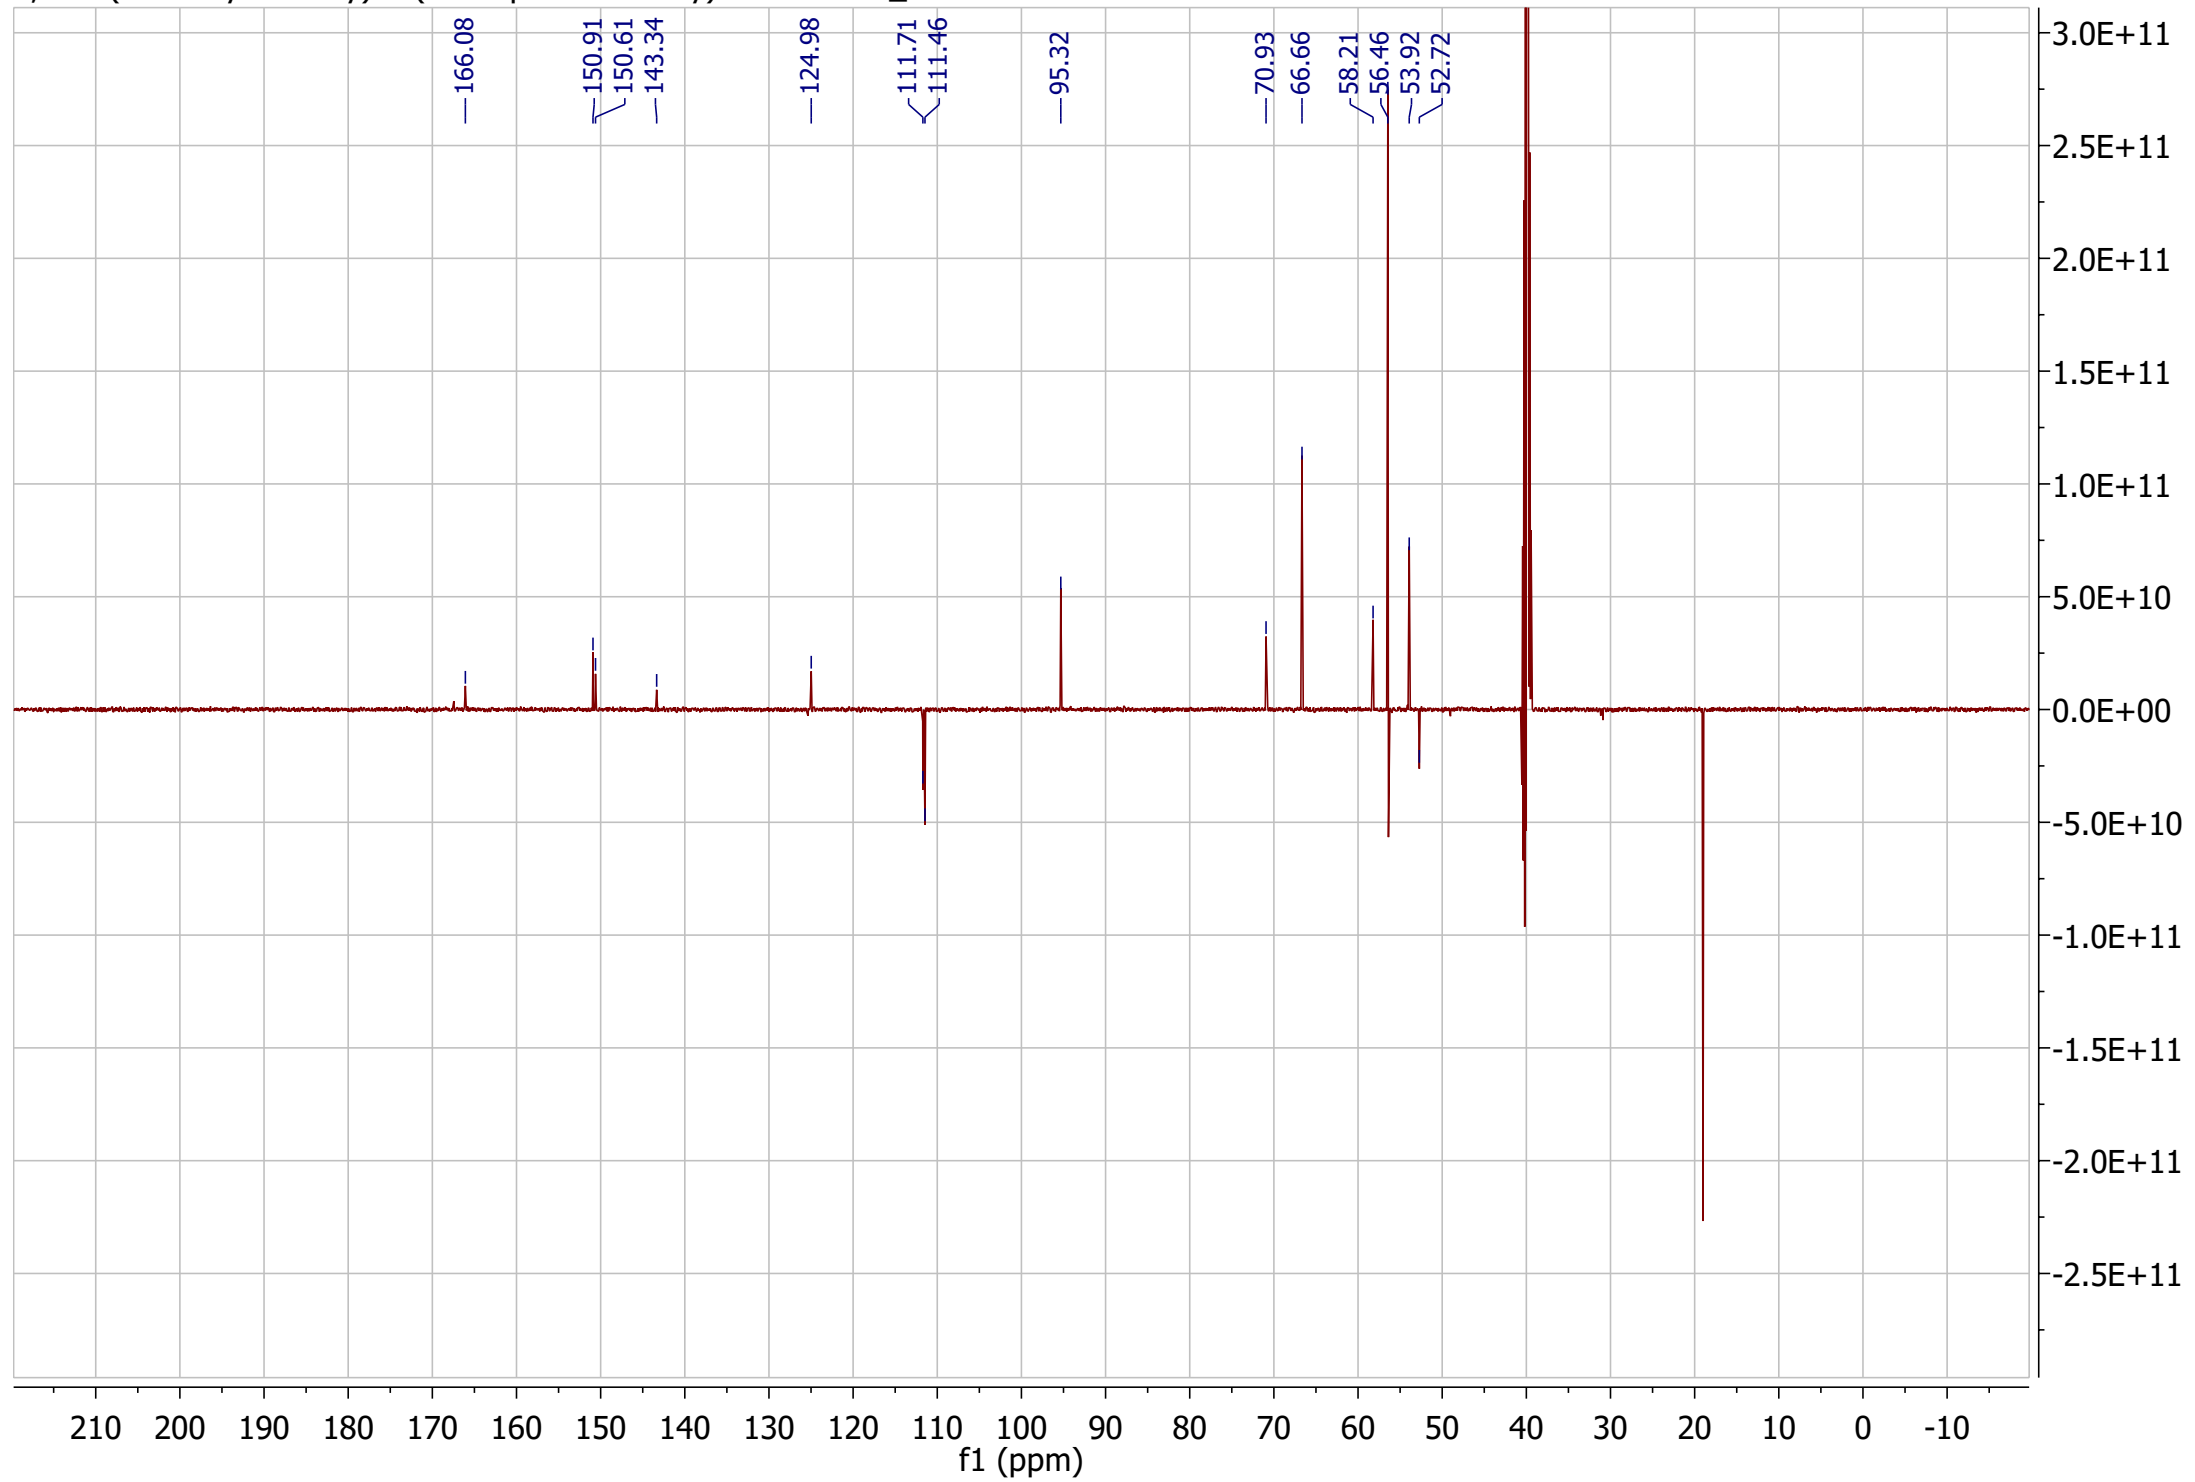

4-(2-(benzyloxy)ethoxy)-3,5-bis(methoxymethoxy)benzoic acid\_DMSO

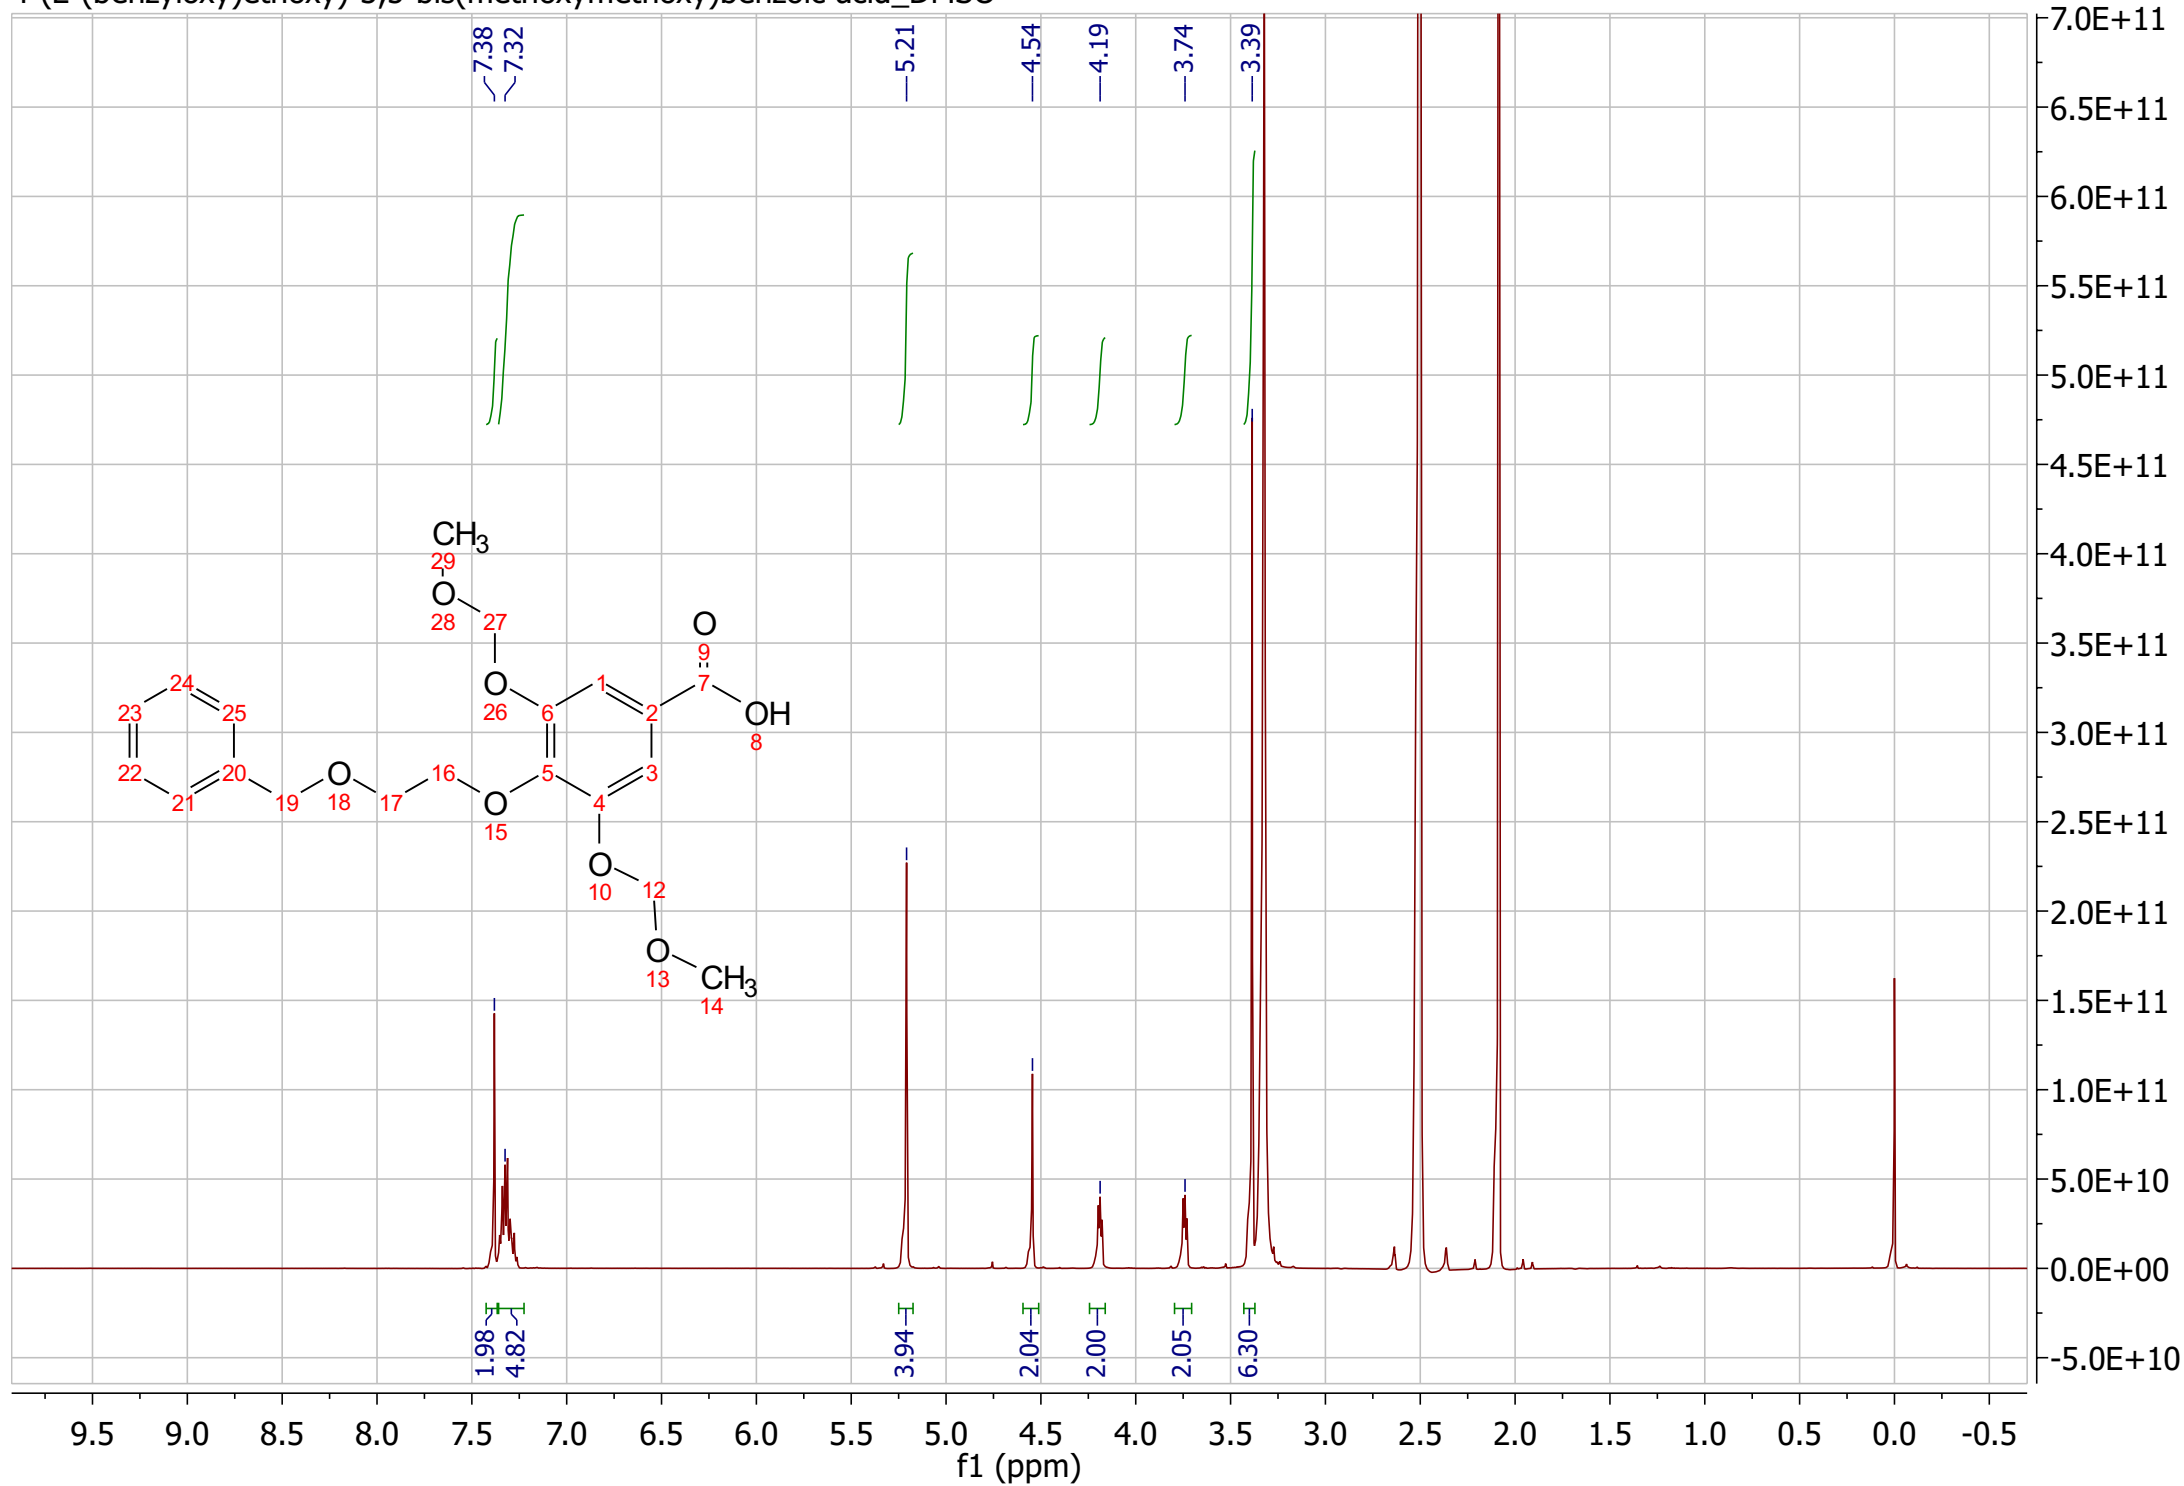



4-(2-(benzyloxy)ethoxy)-3,5-bis(methoxy)benzoic acid\_DMSO

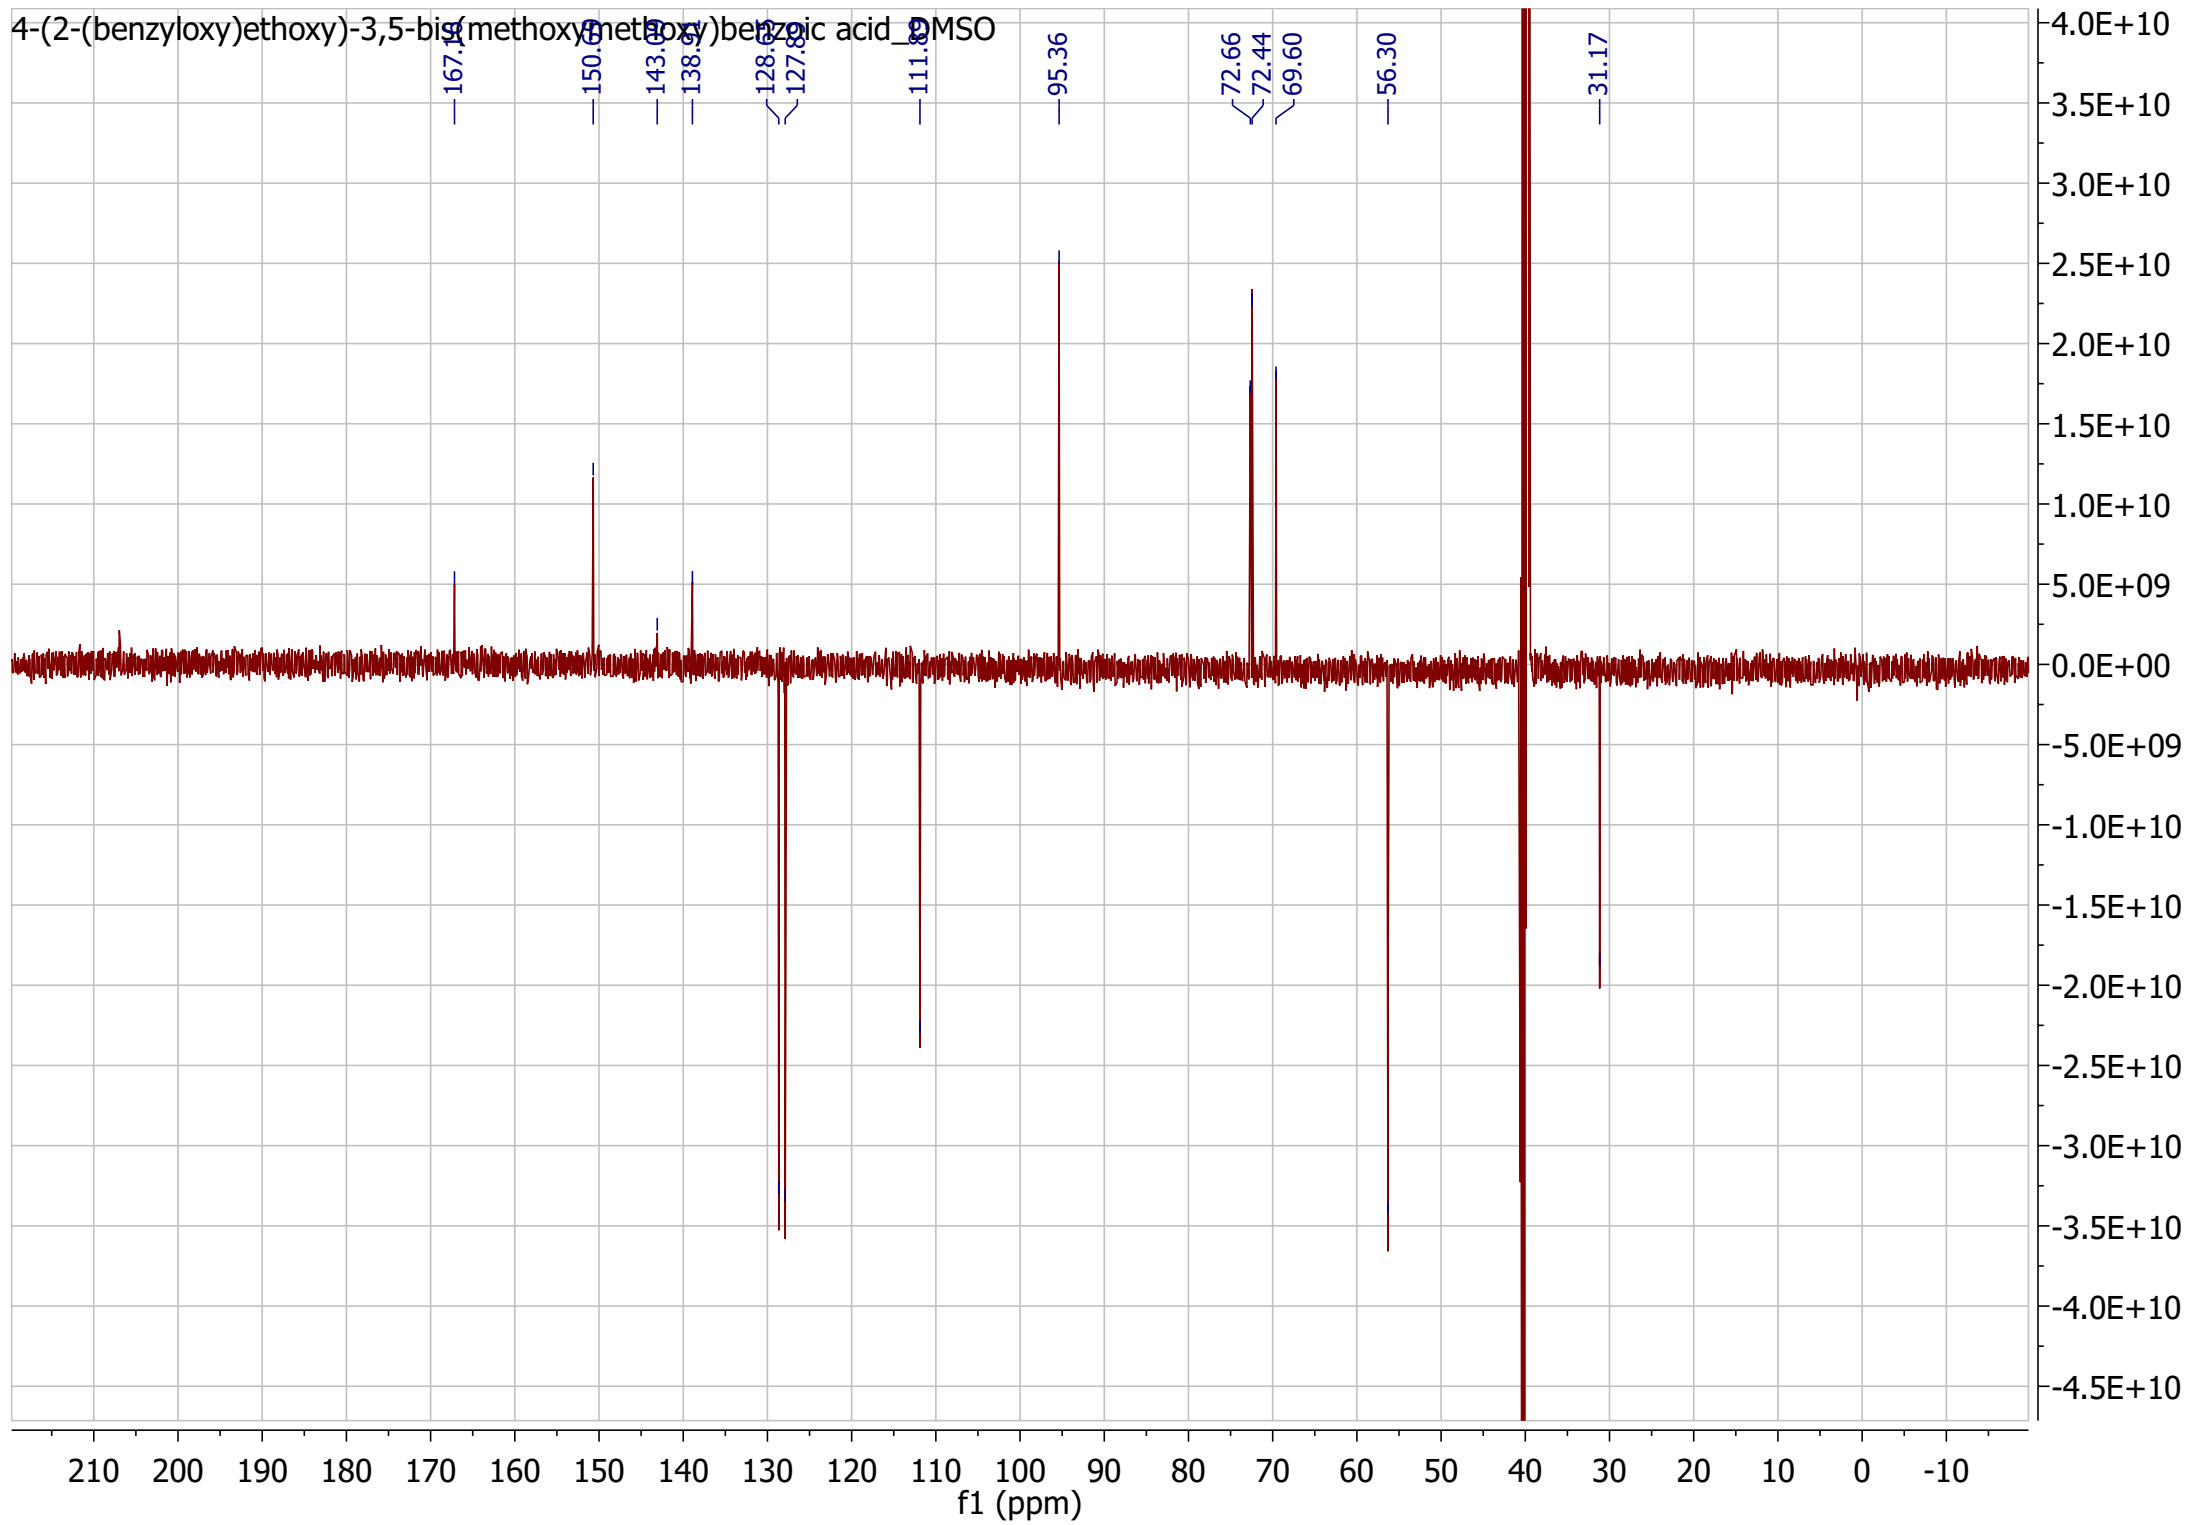

3-((4-methoxybenzyloxy)propyl 4-(benzyloxy)-3,5-bis(methoxymethoxy)benzoate\_CDCl3

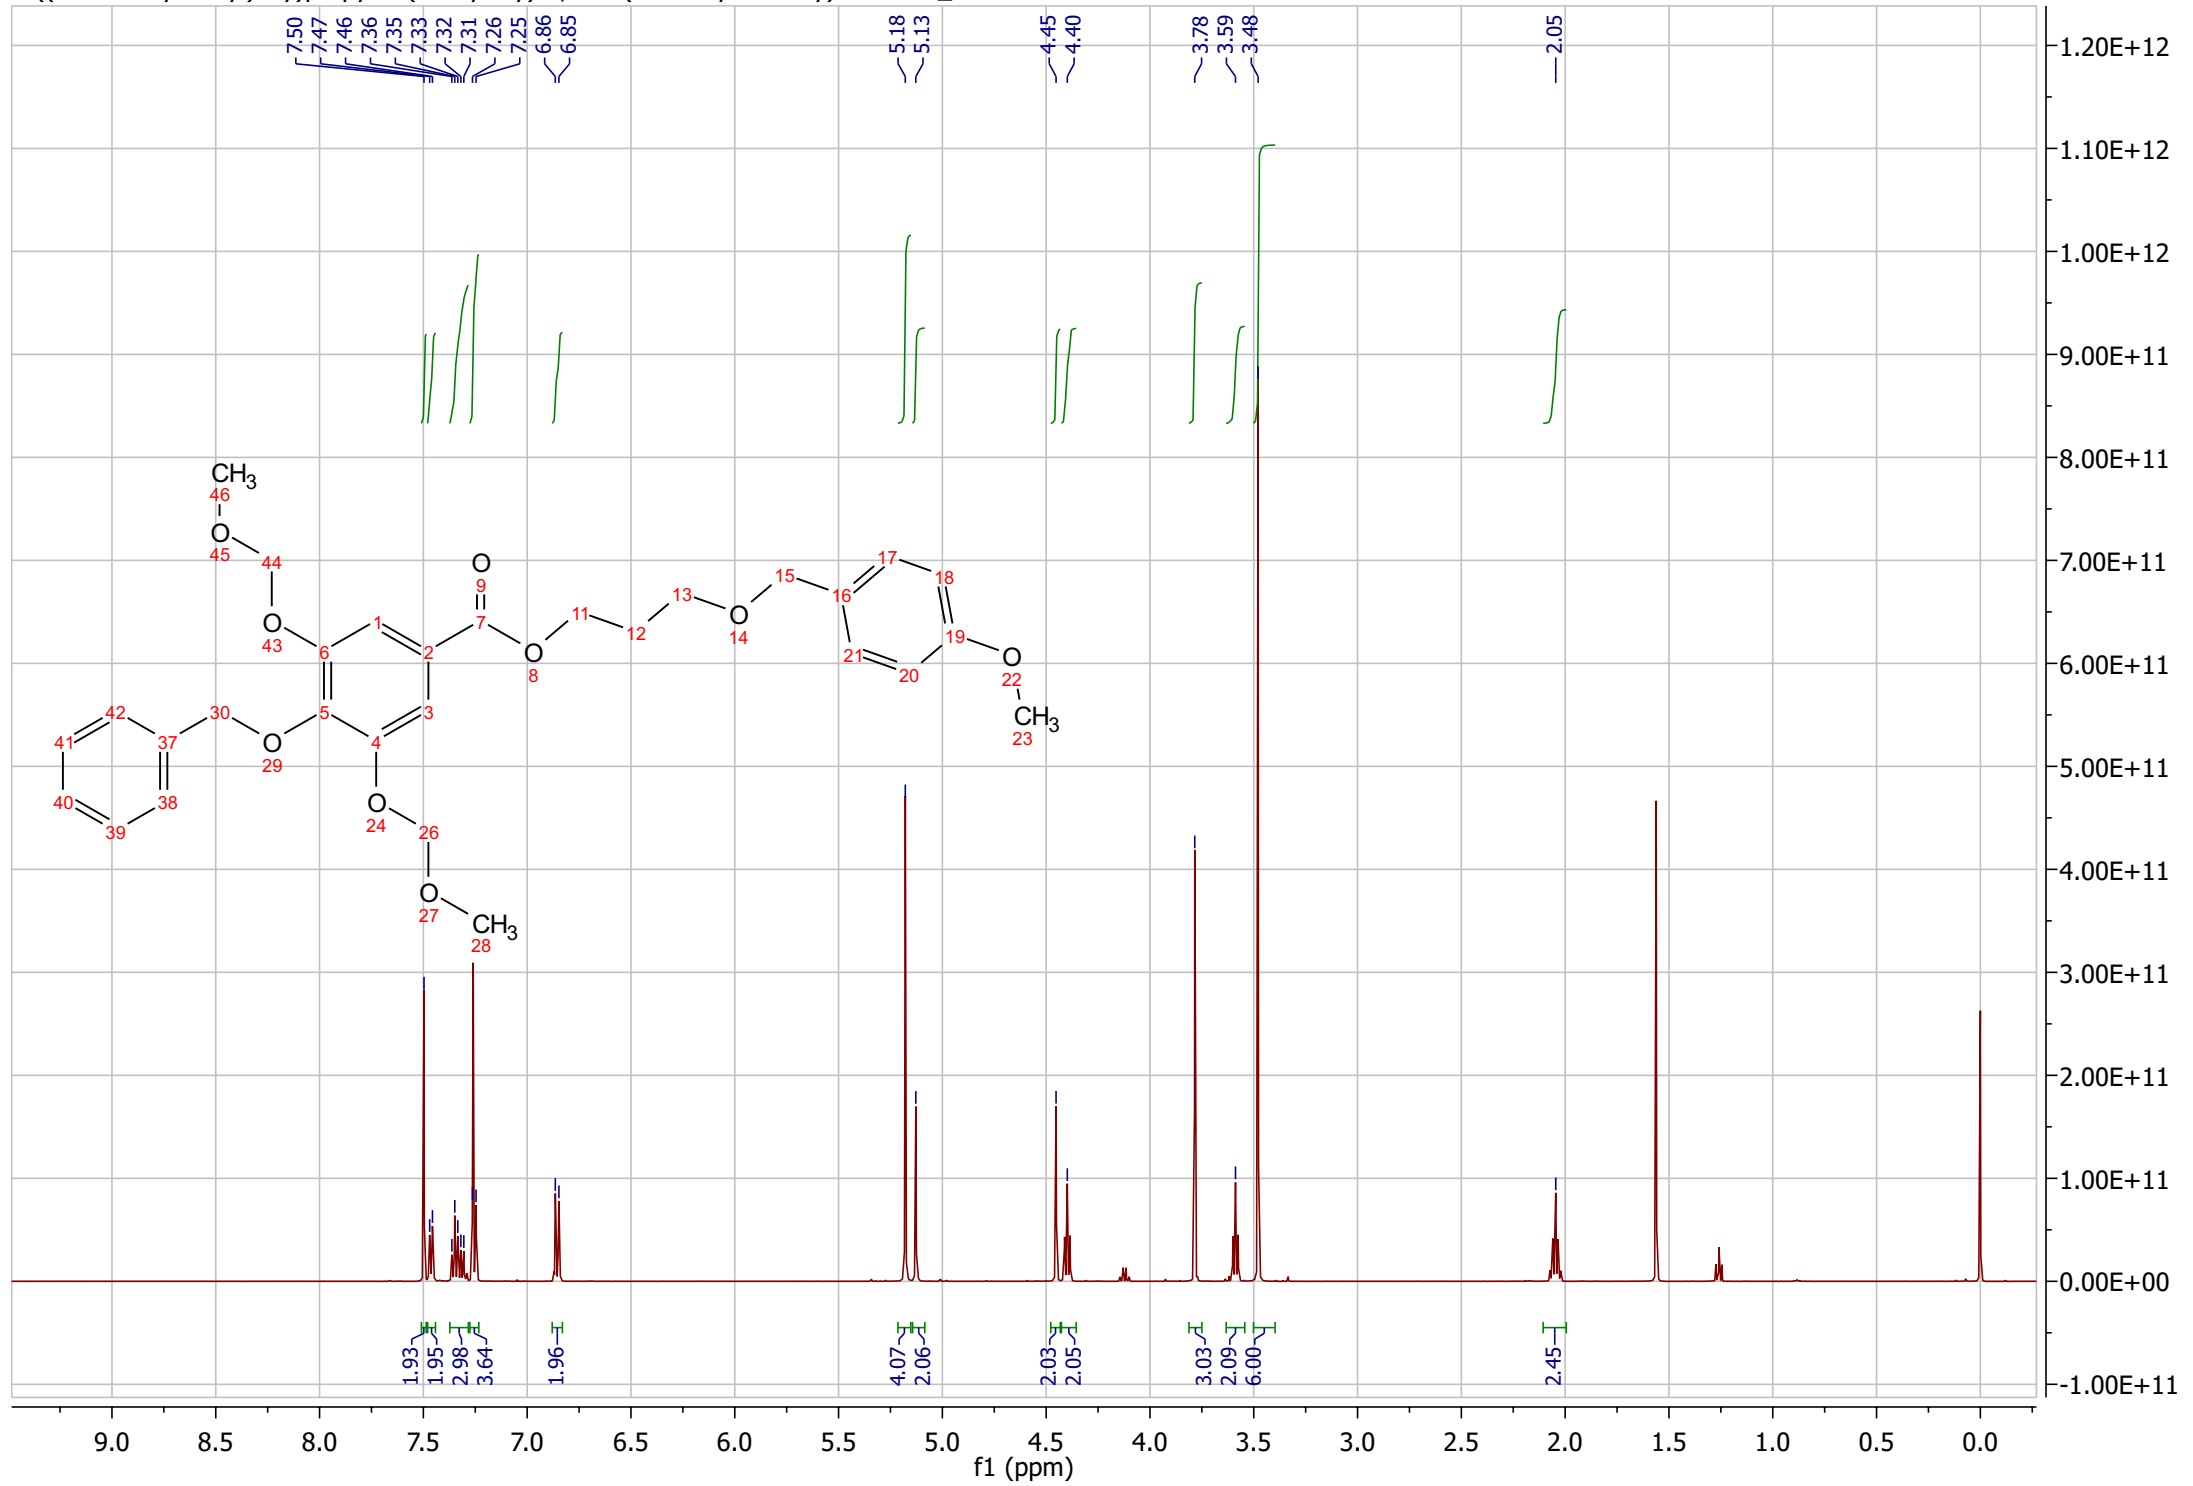

2-((4-methoxybenzyl)oxy)ethyl 4-(benzyloxy)-3,5-bis(methoxymethoxy)benzoate\_CDCl3

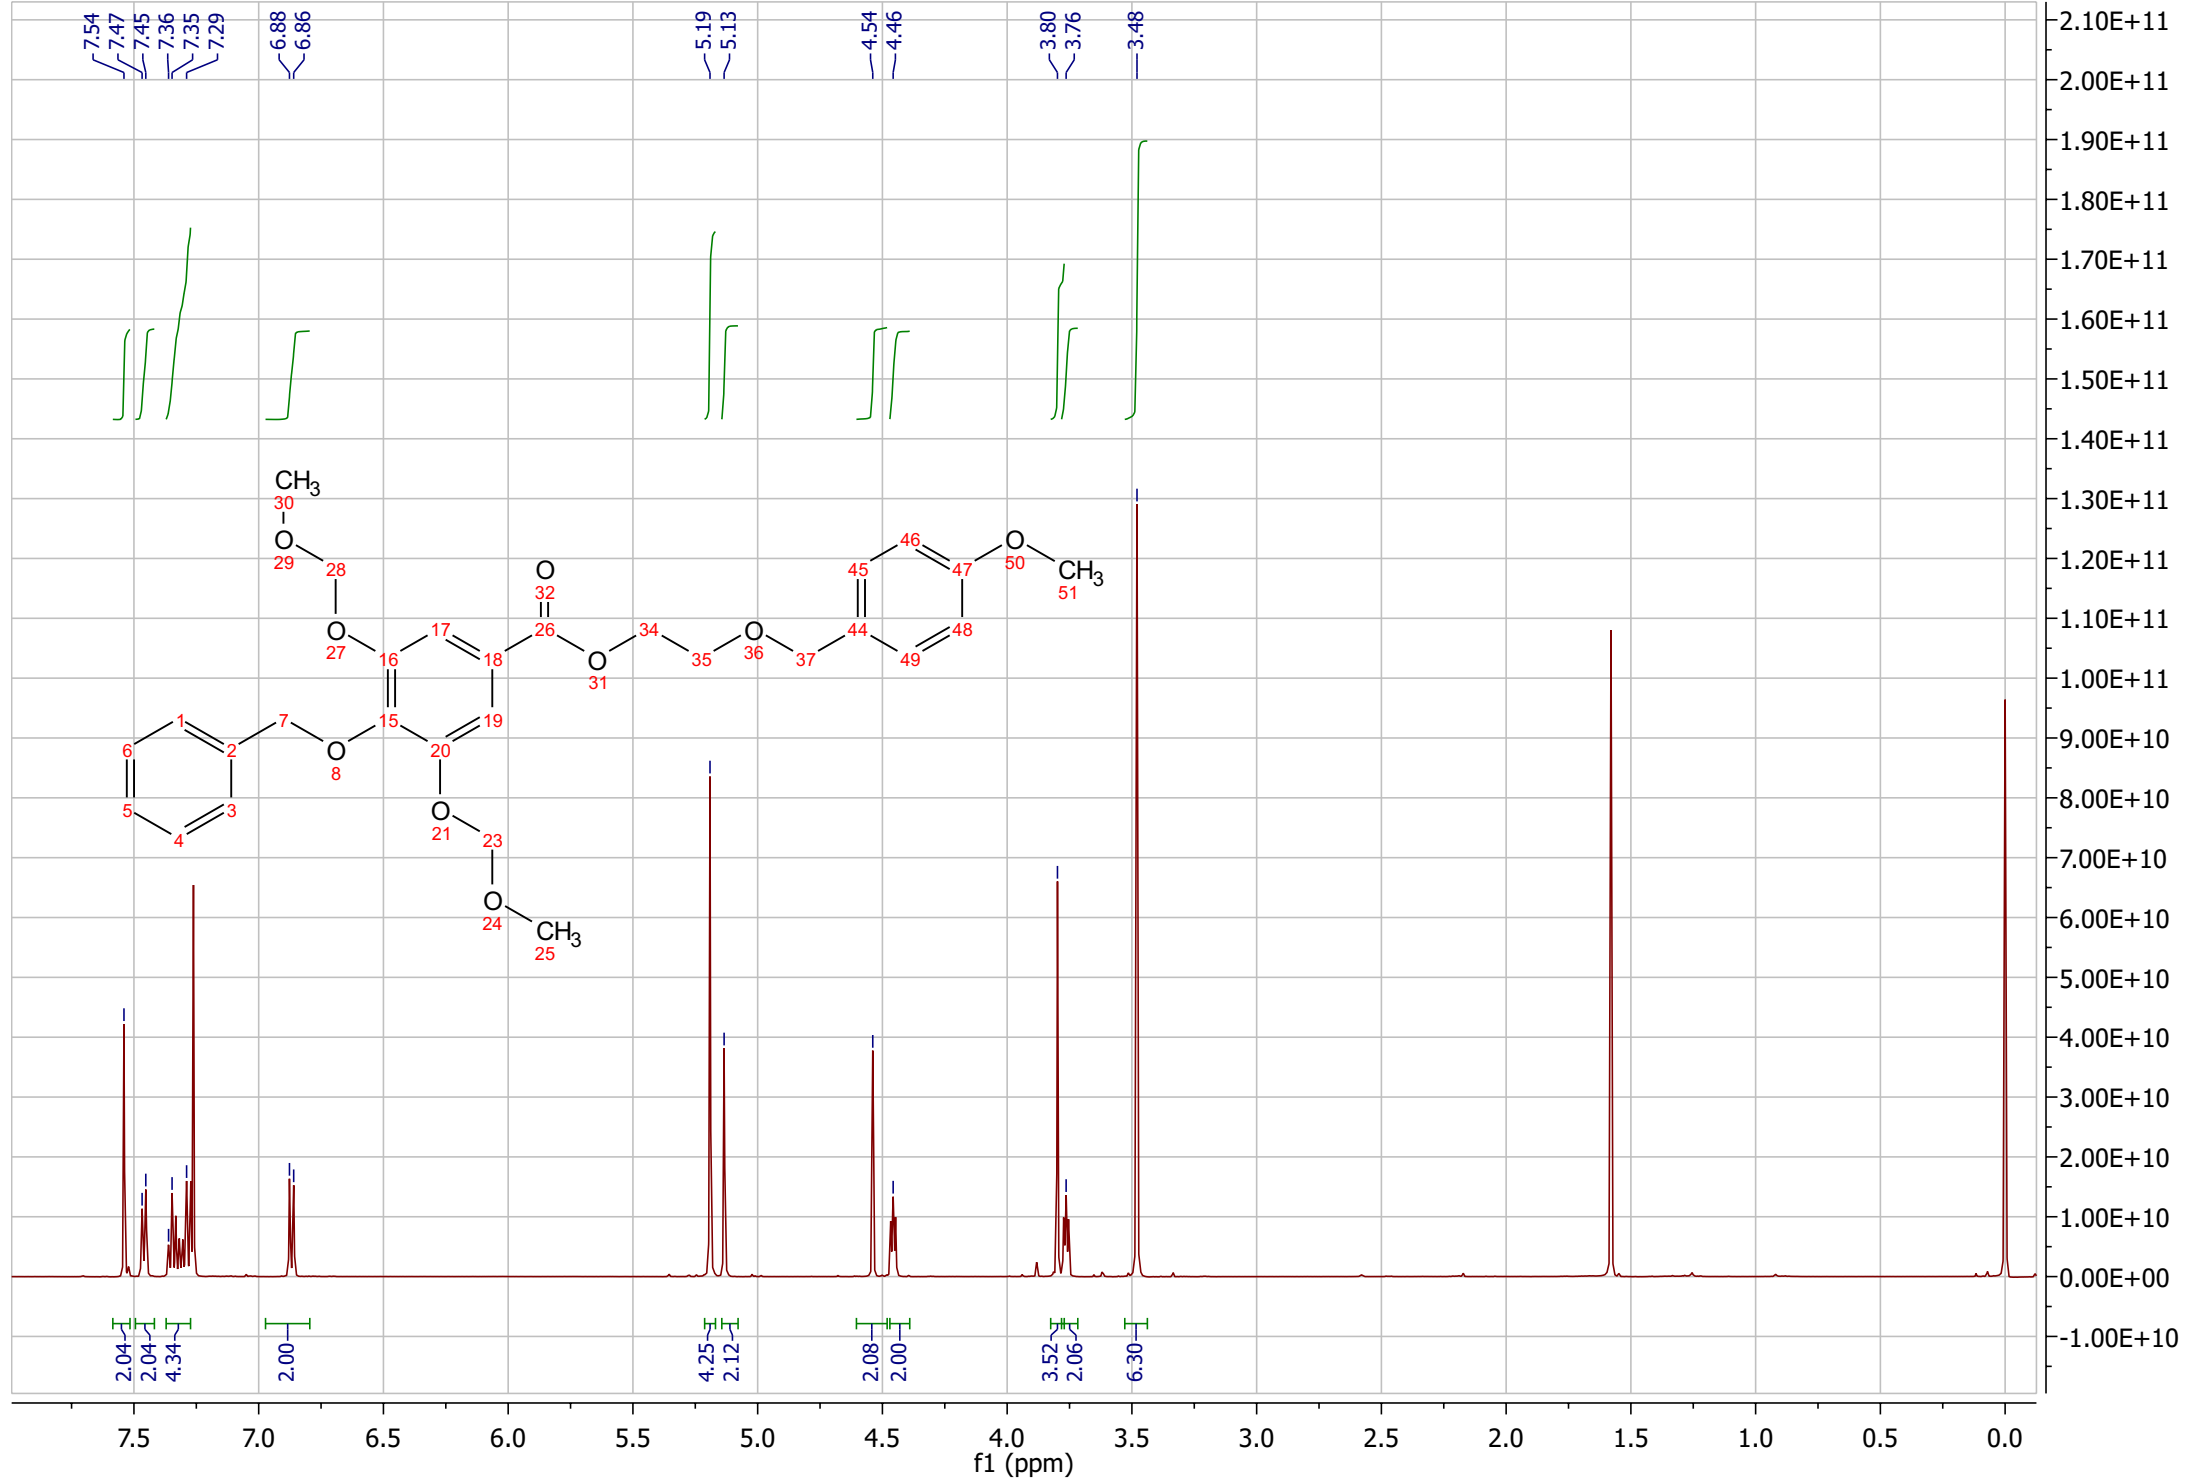

2-((4-methoxybenzyl)oxy)ethyl 4-(benzyloxy)-3,5-bis(methoxymethoxy)benzoate\_CDCl3

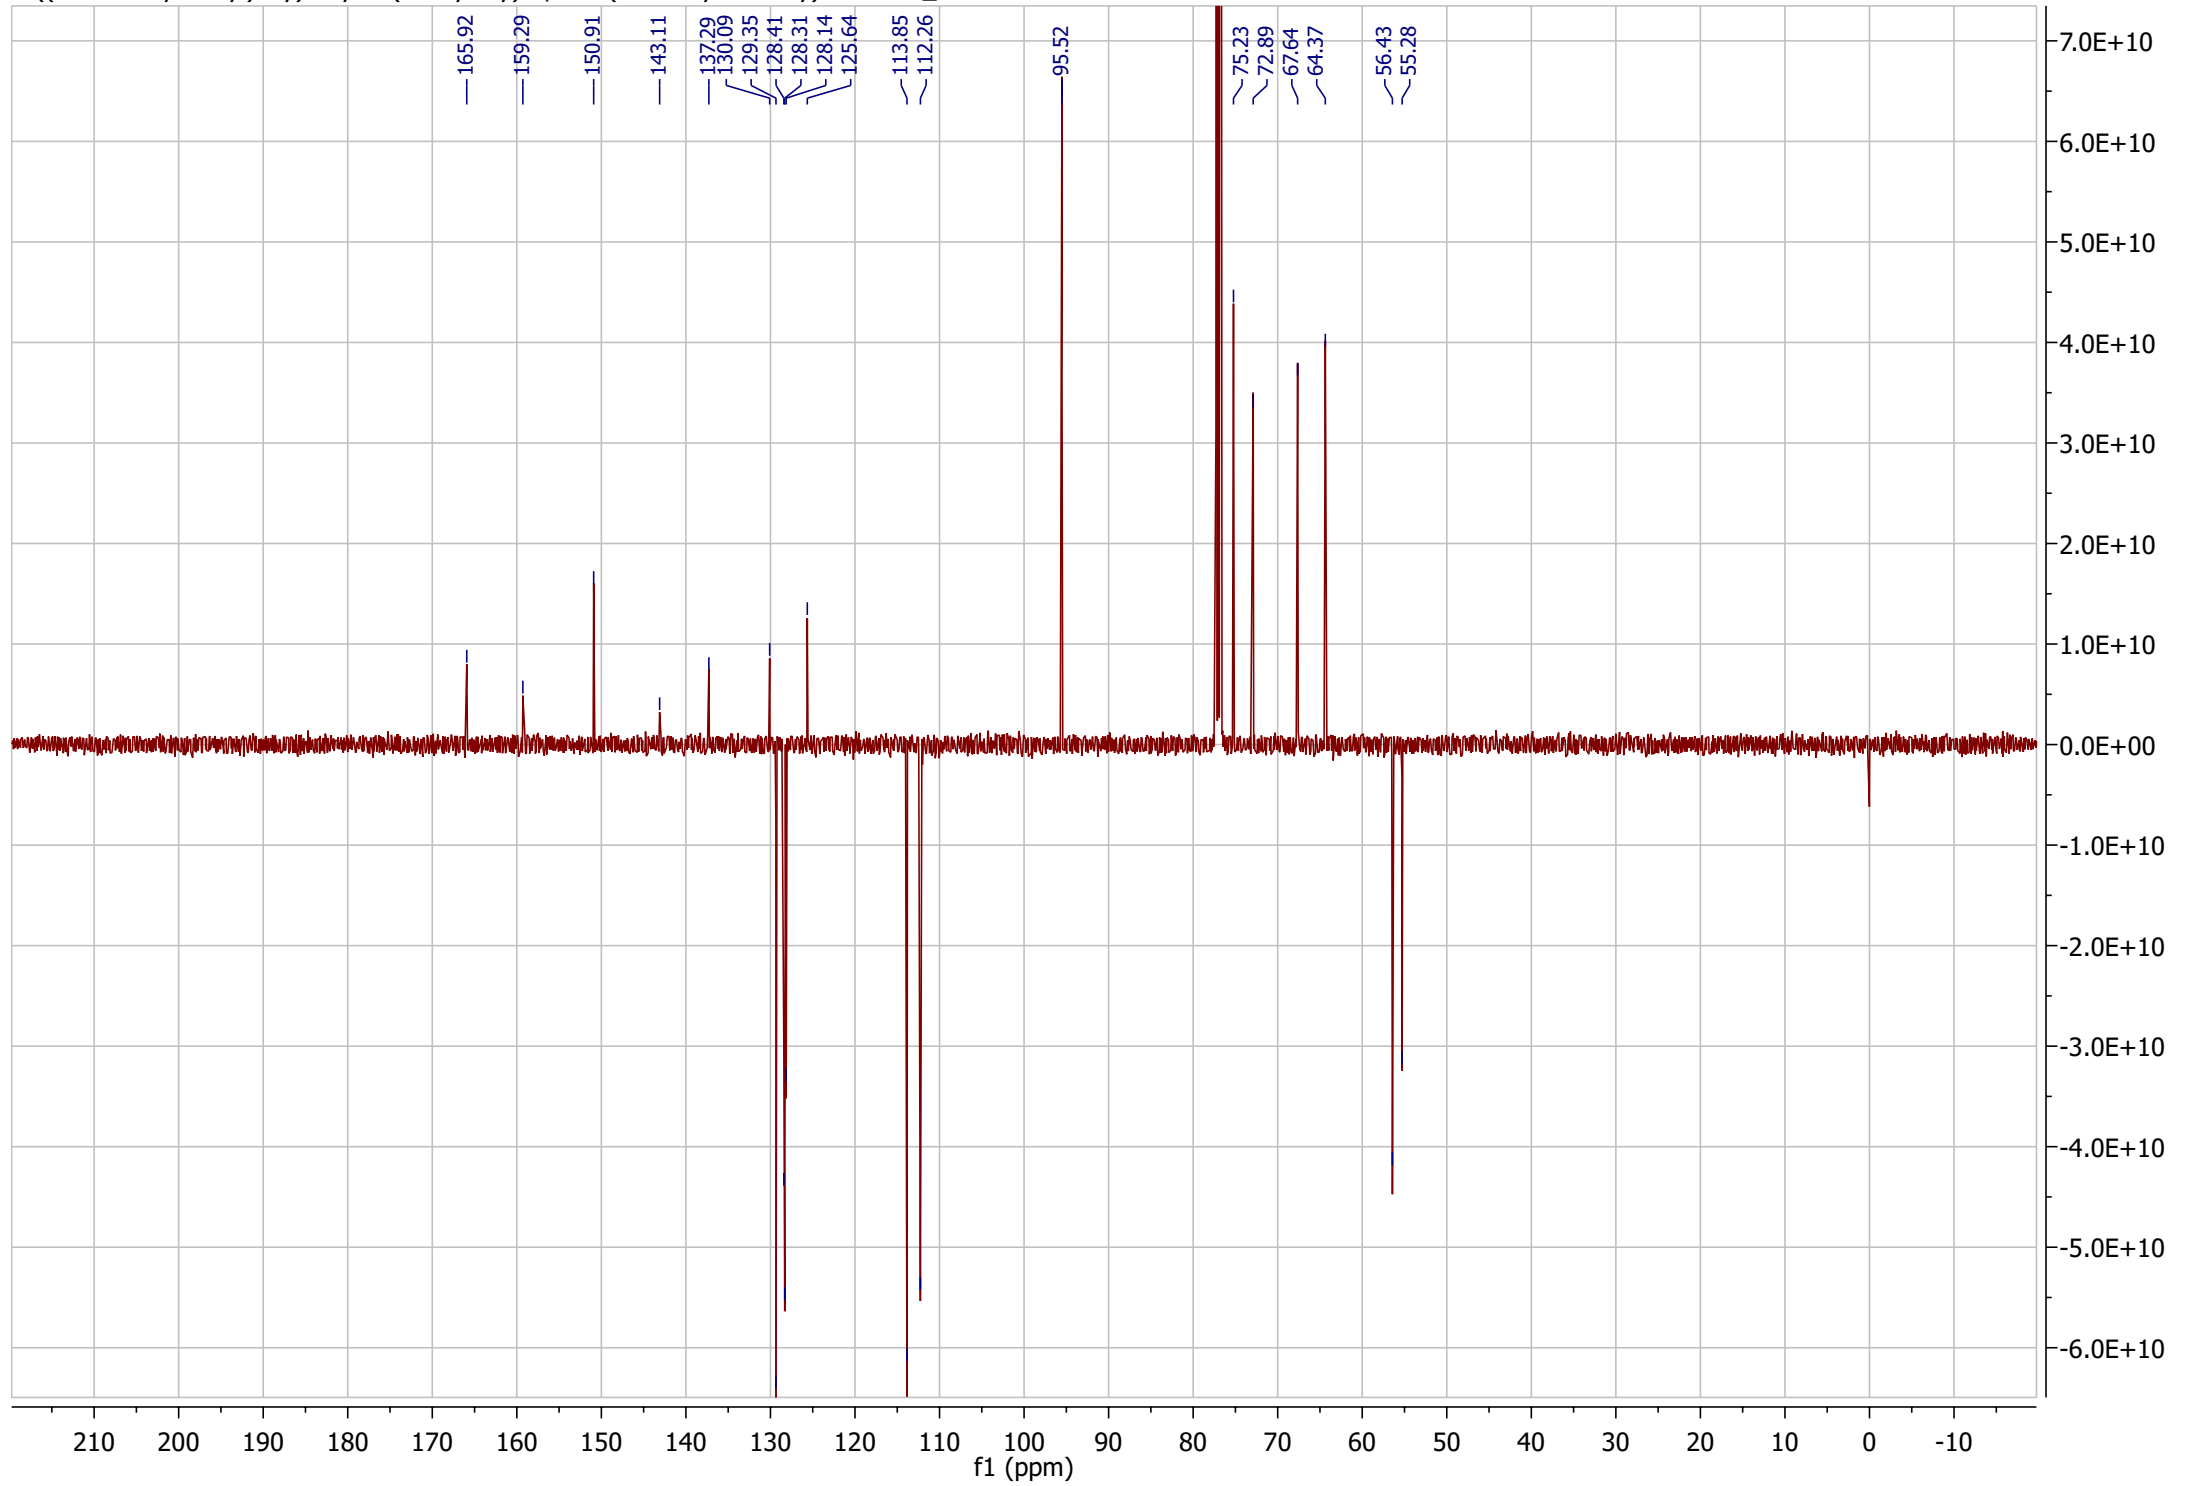

3-((4-methoxybenzyl)oxy)propyl benzoate\_CDCl3

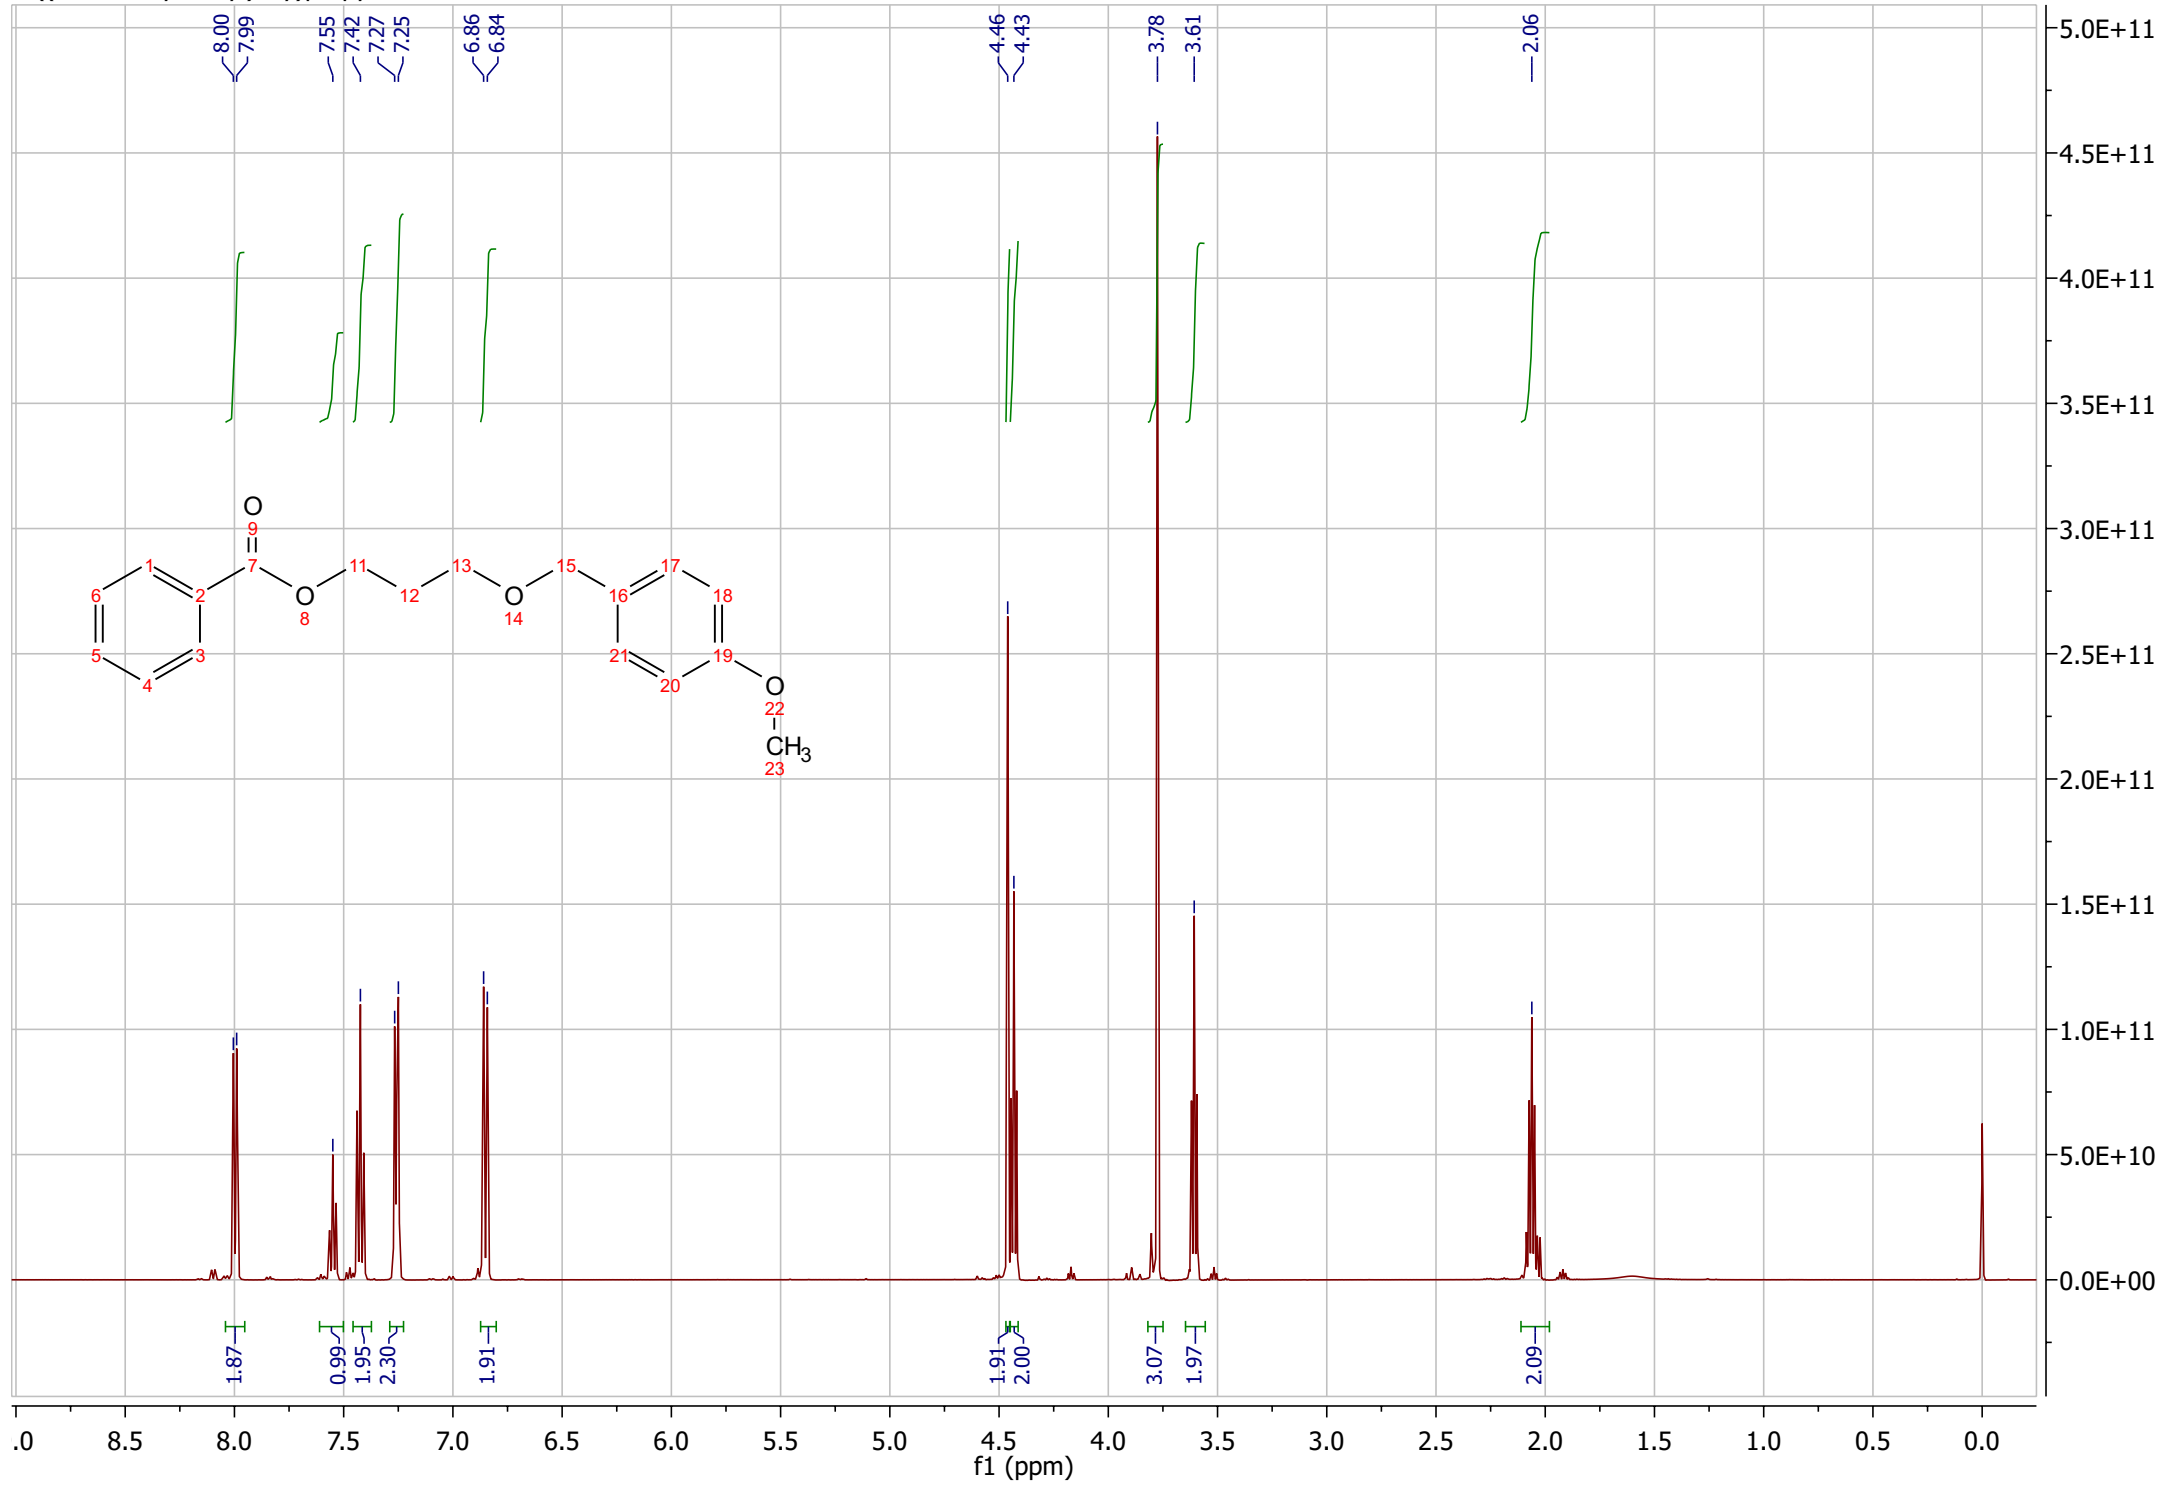

3-((4-methoxybenzyl)oxy)propyl benzoate\_CDCl3

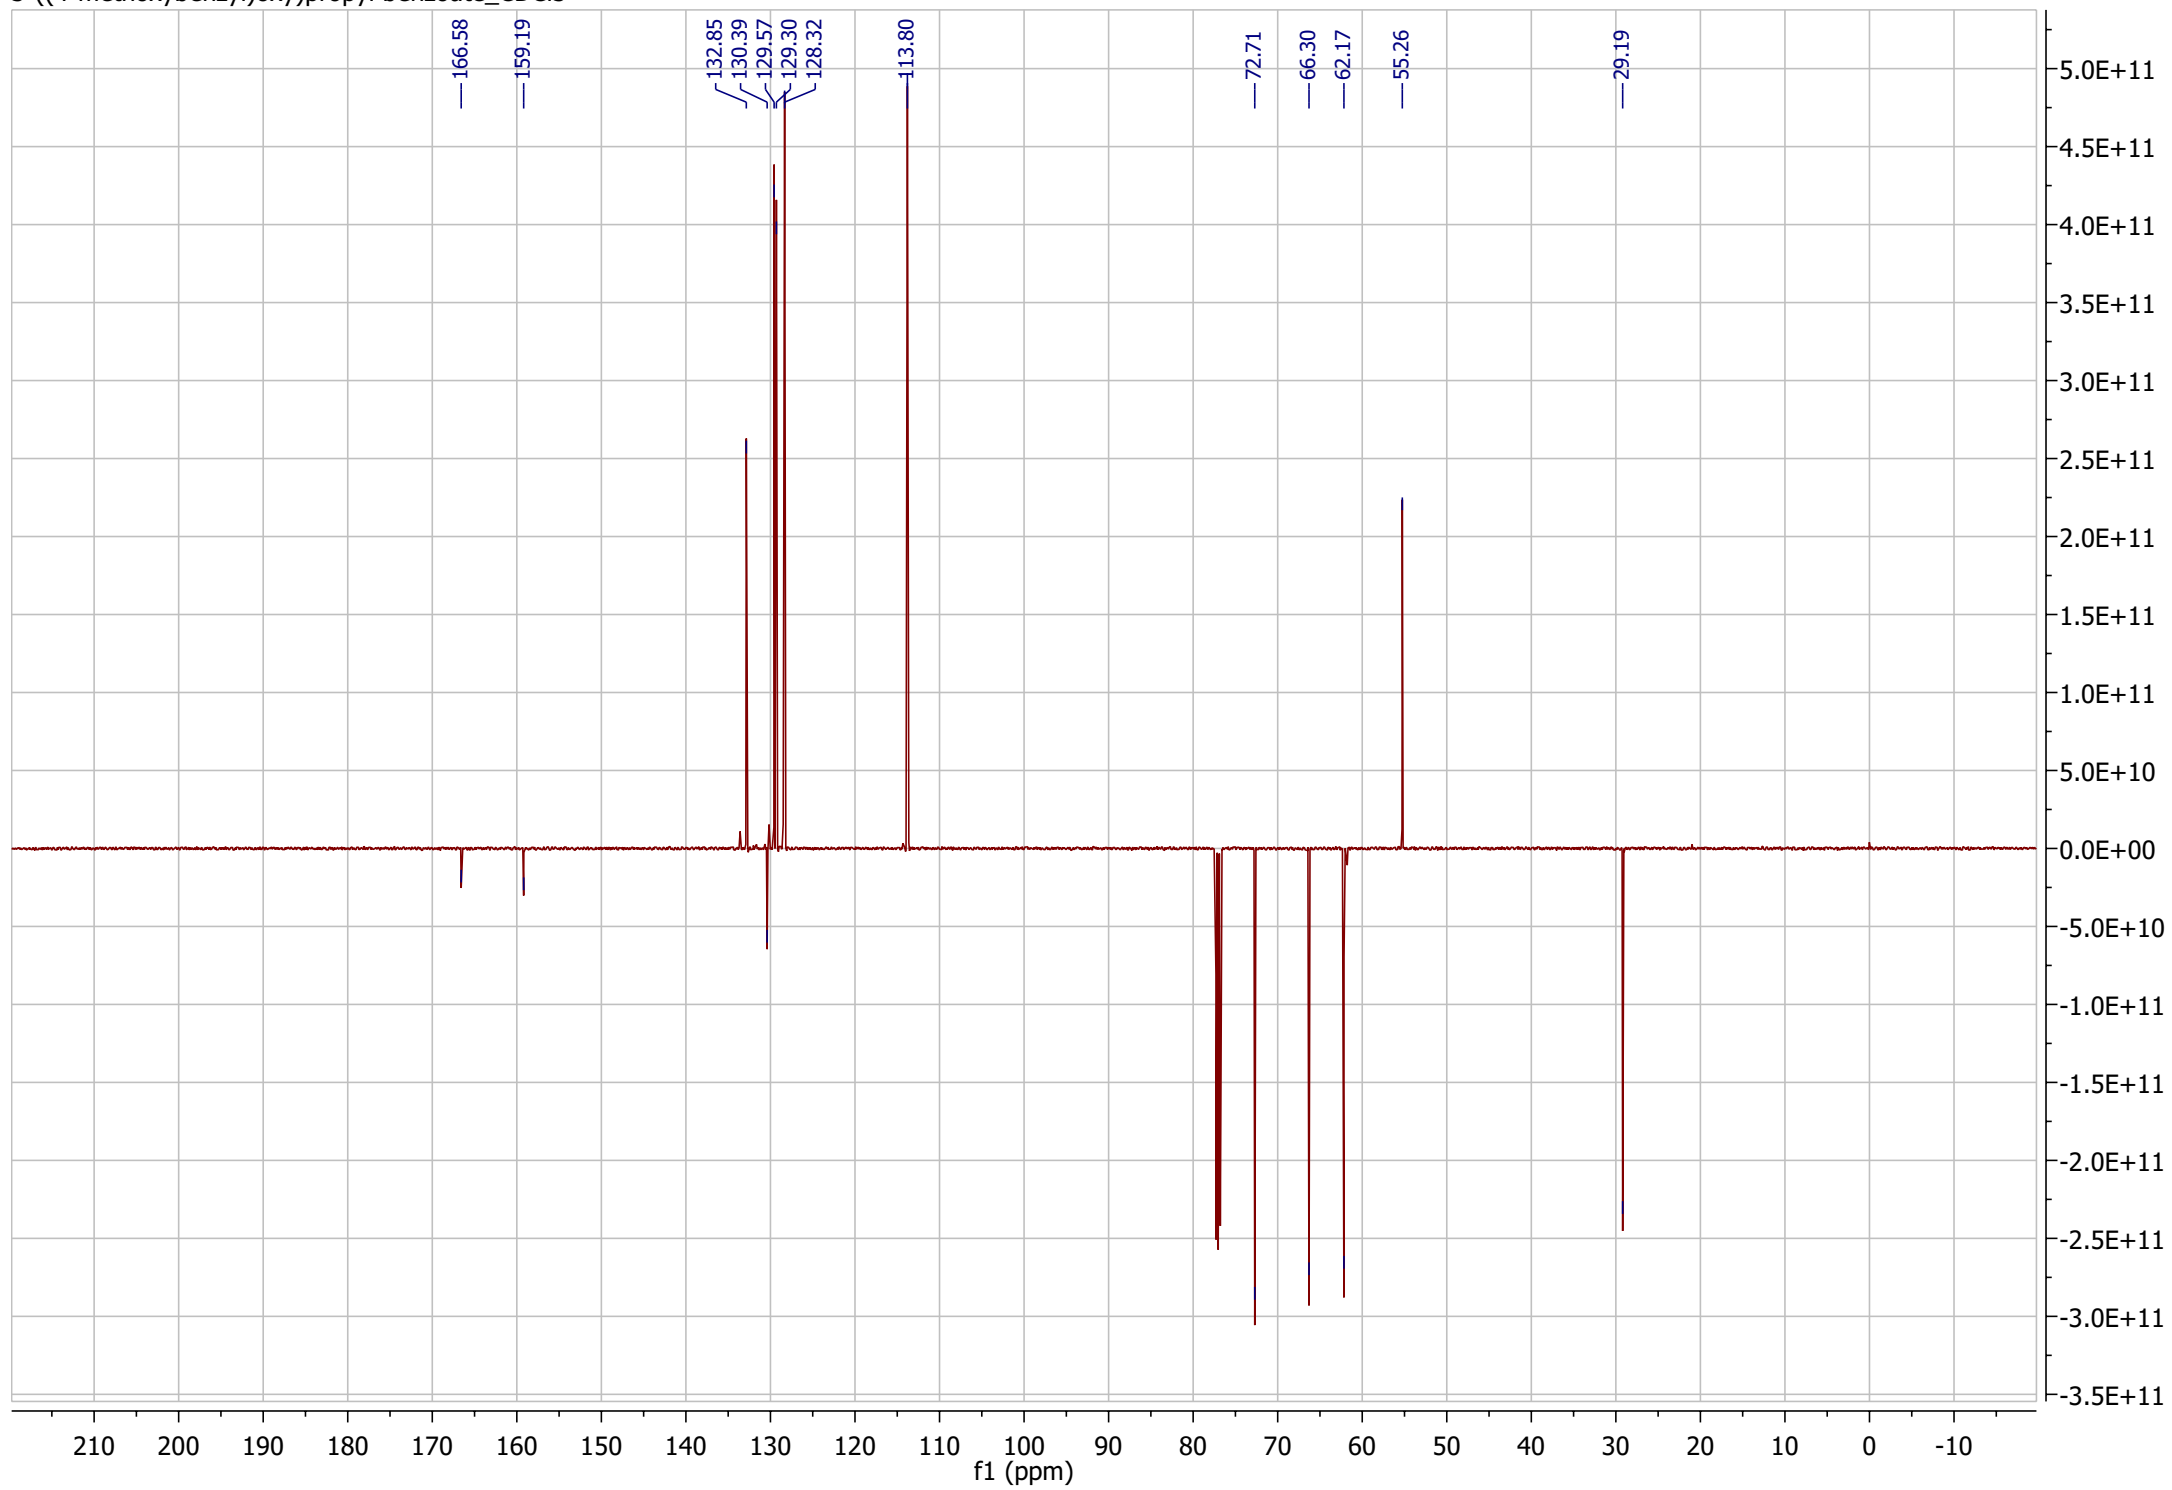

3-hydroxypropyl 4-(benzyloxy)-3,5-bis(methoxymethoxy)benzoate\_CDCl3

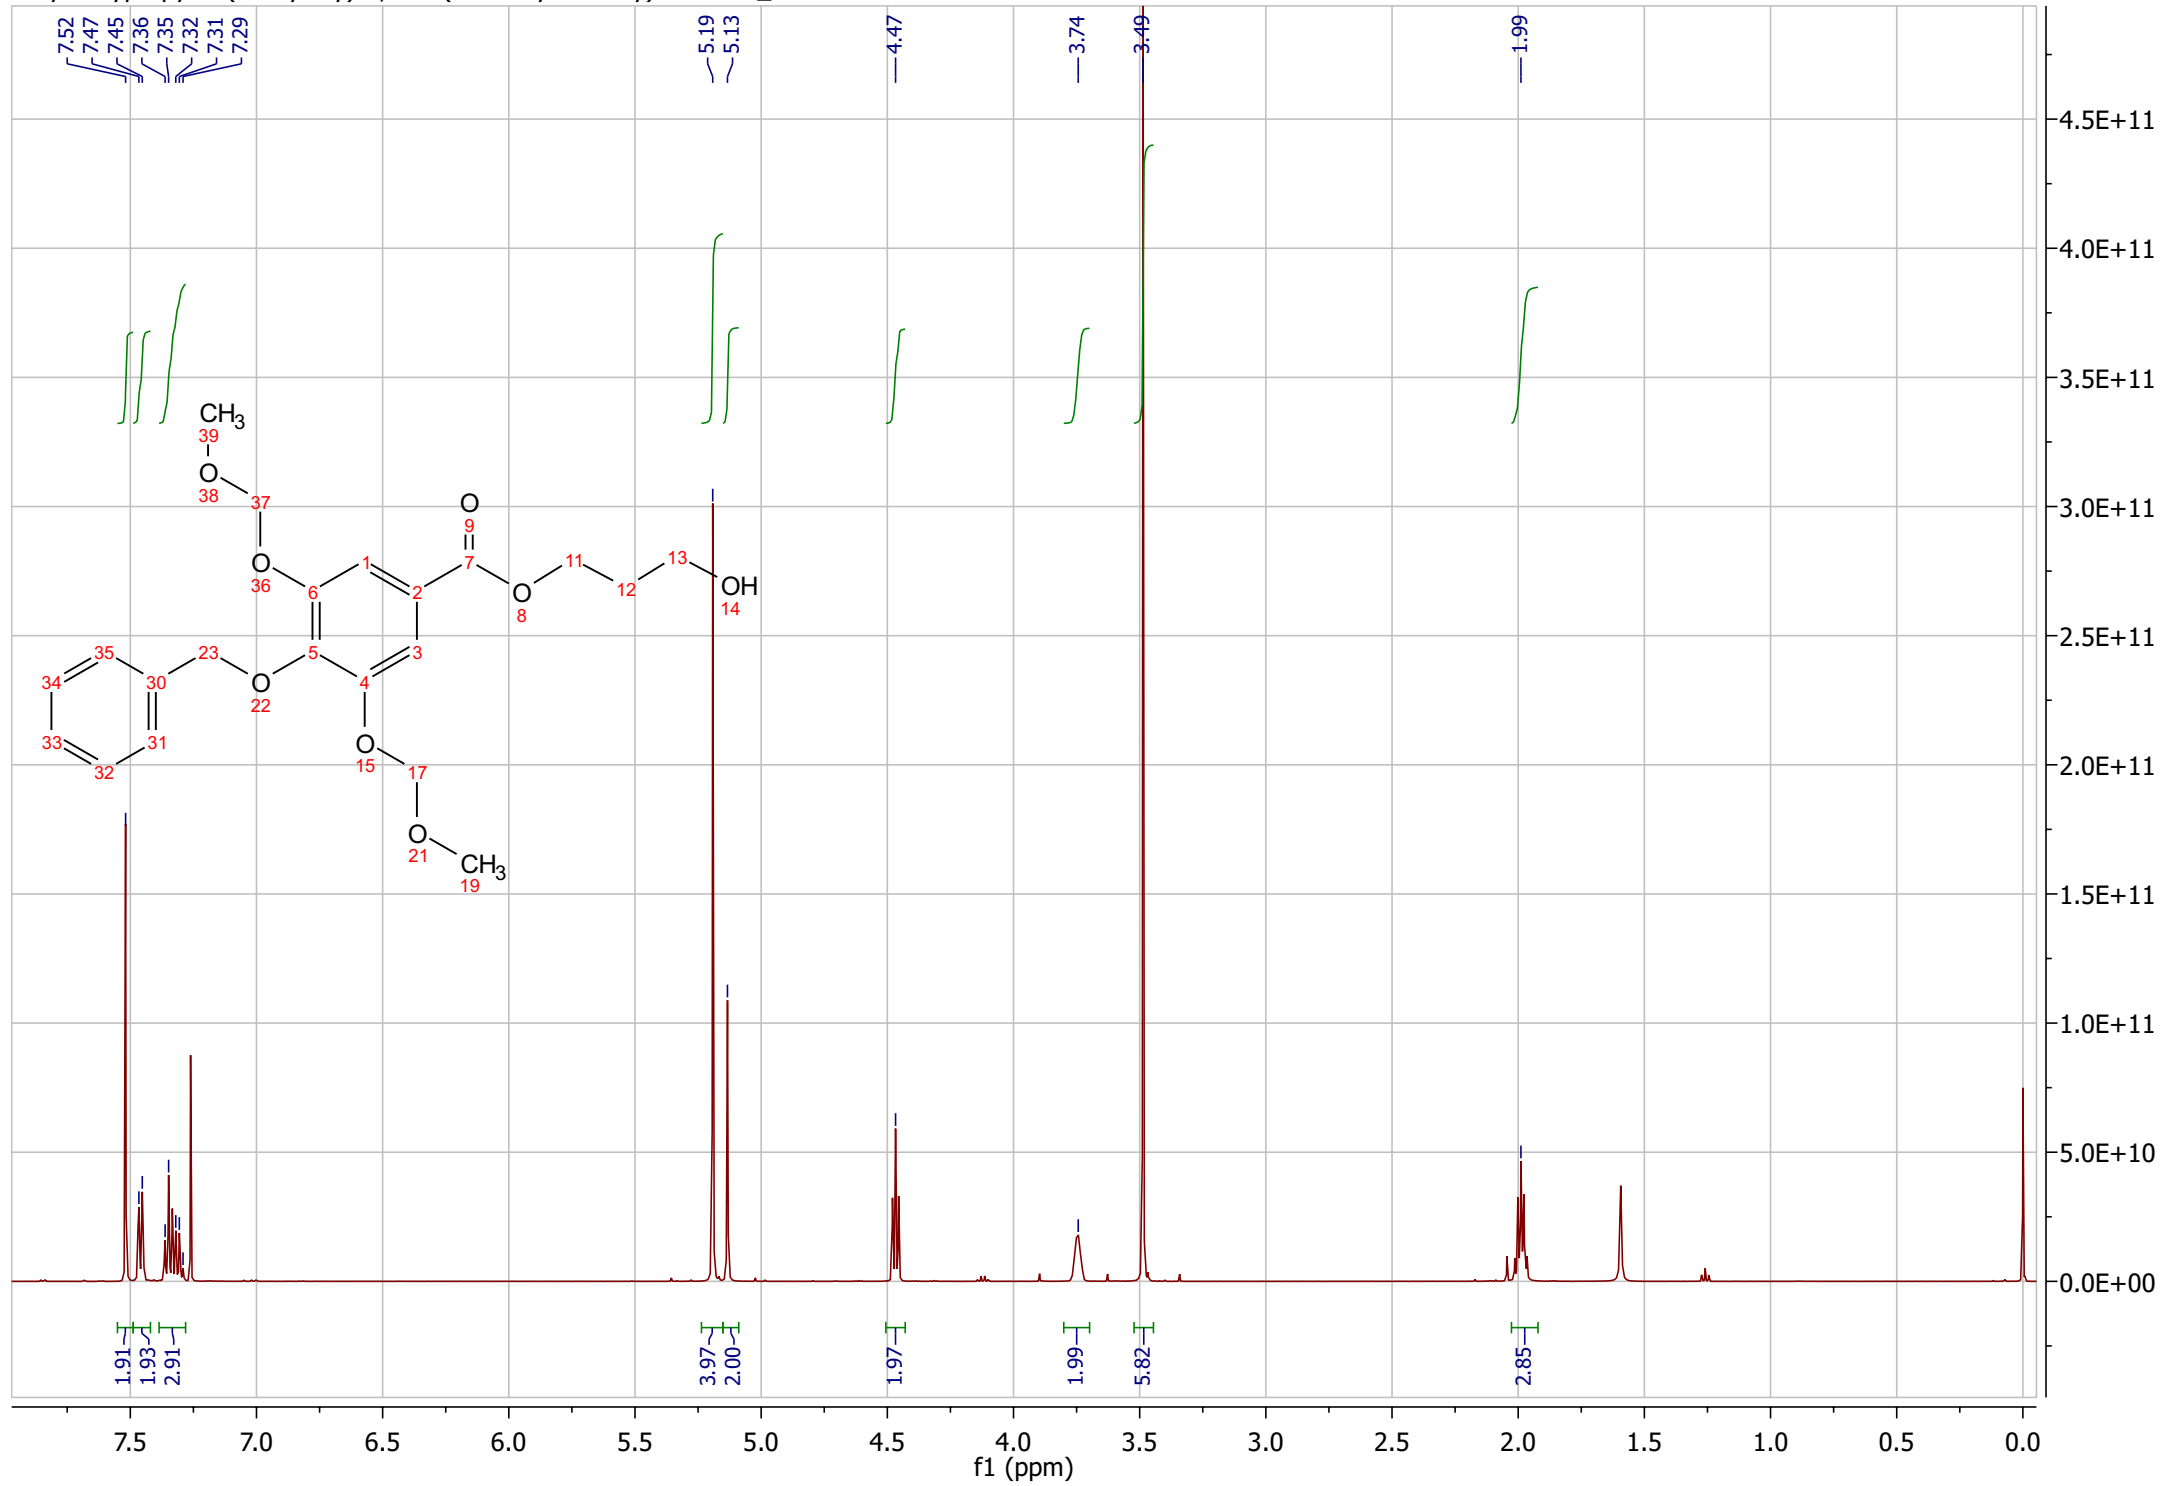

3-hydroxypropyl 4-(benzyloxy)-3,5-bis(methoxymethoxy)benzoate\_CDCl3

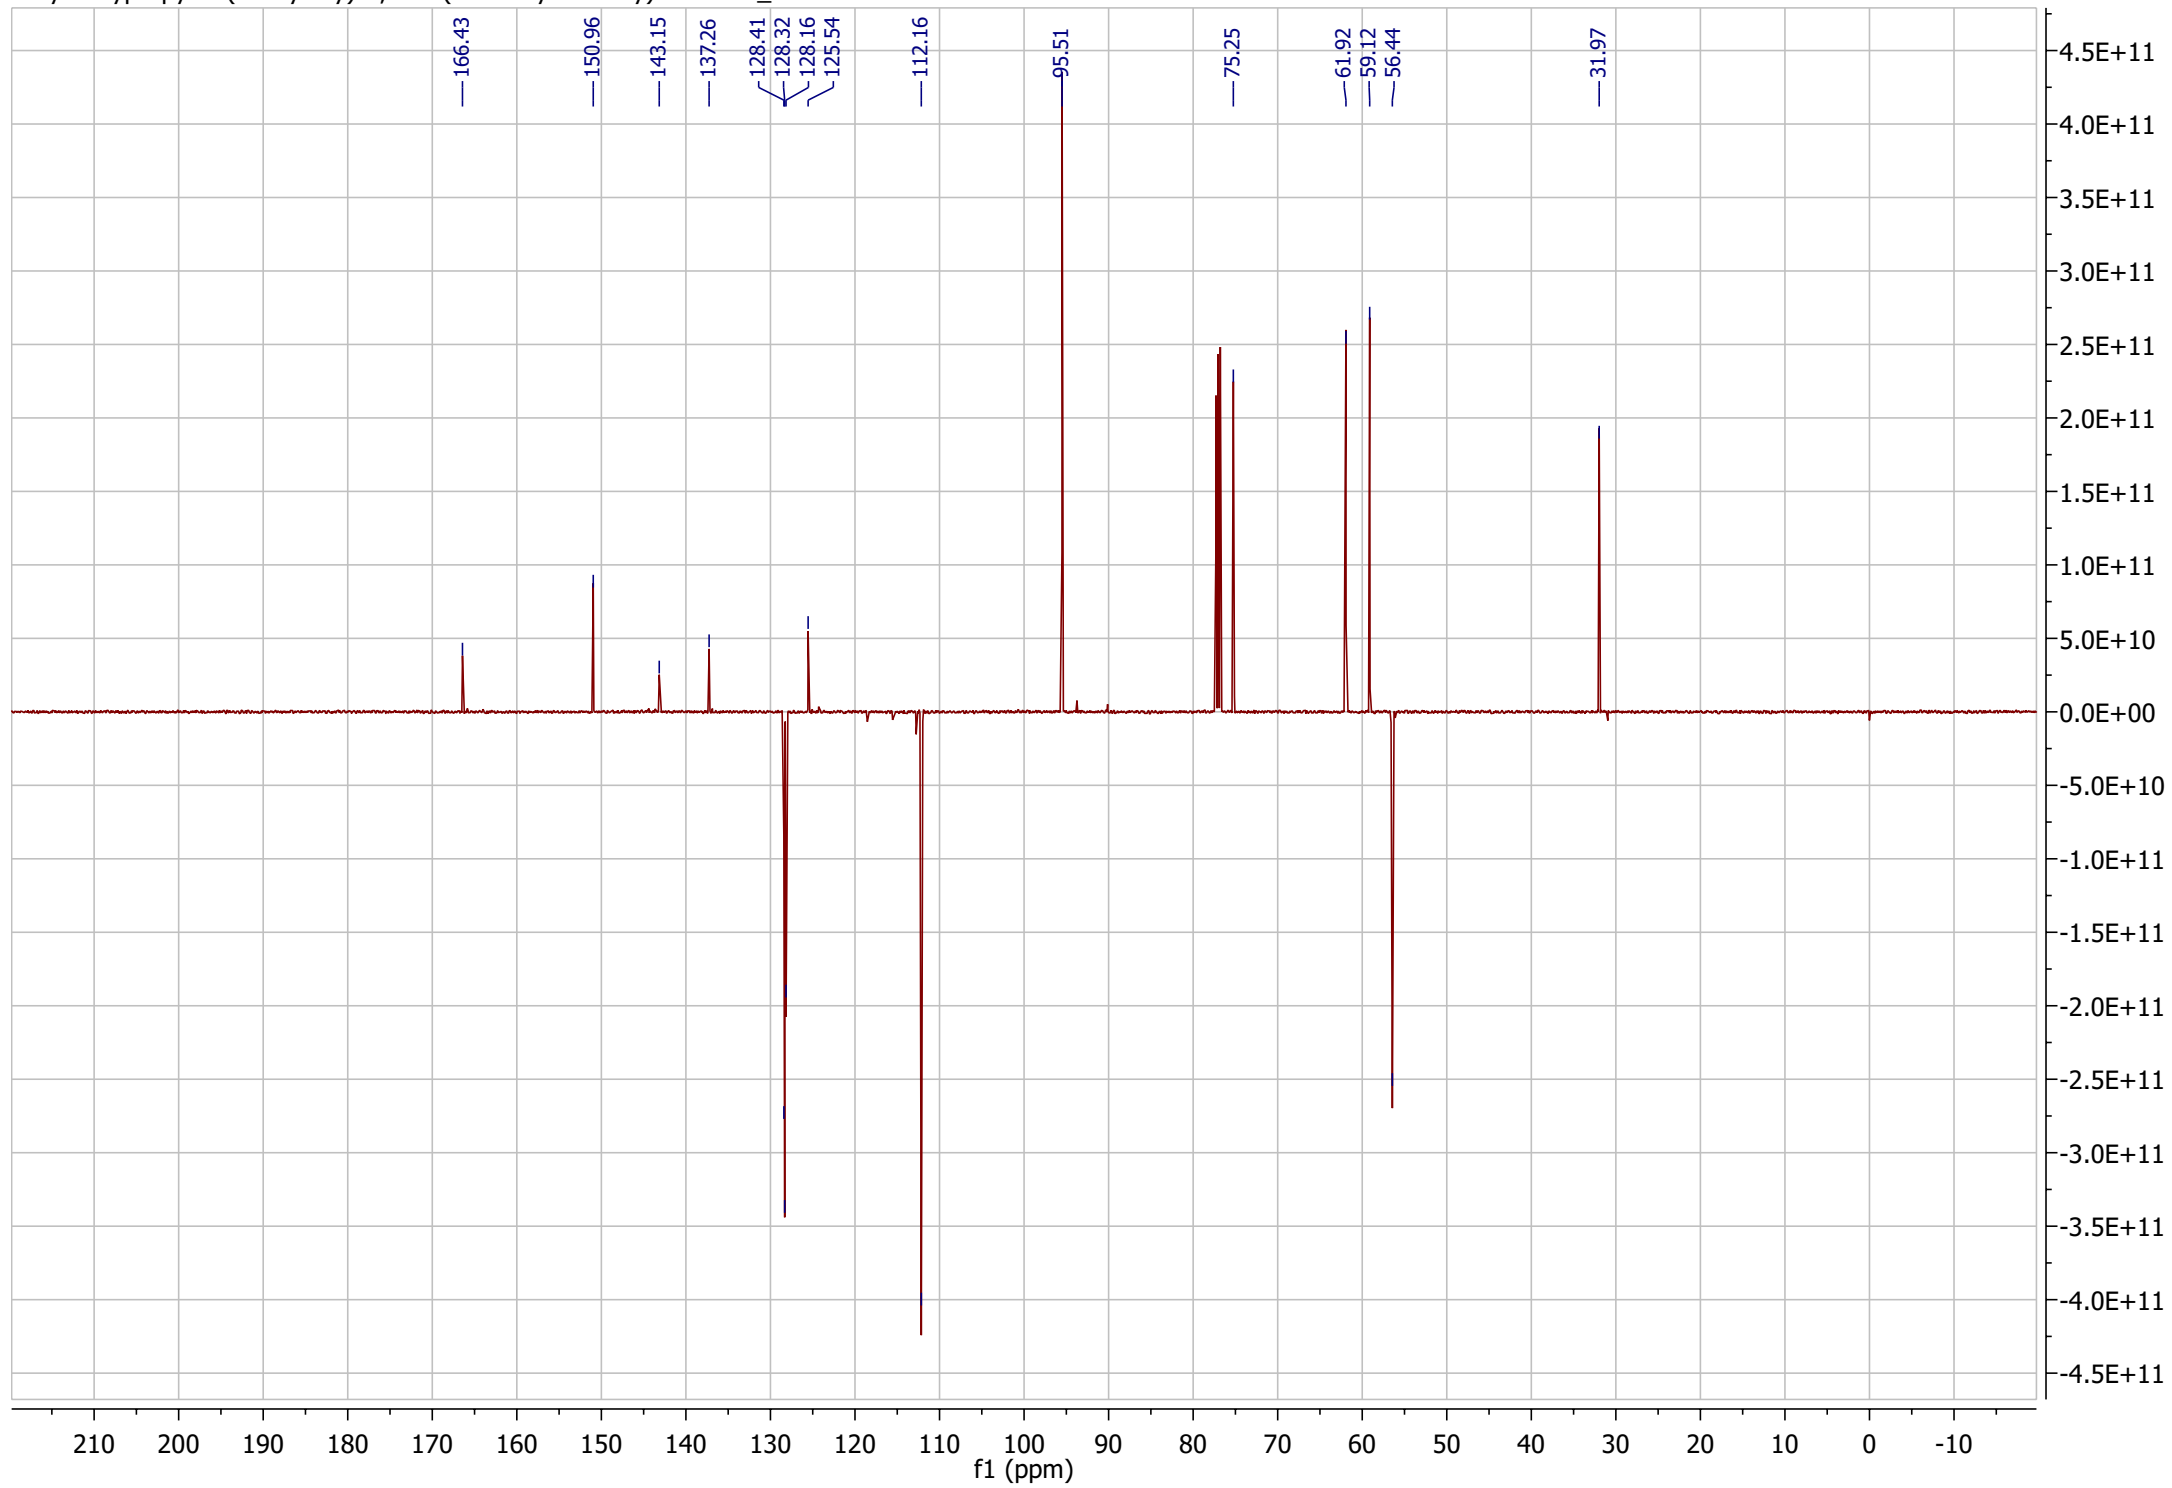



3-hydroxypropyl benzoate\_CDCl3

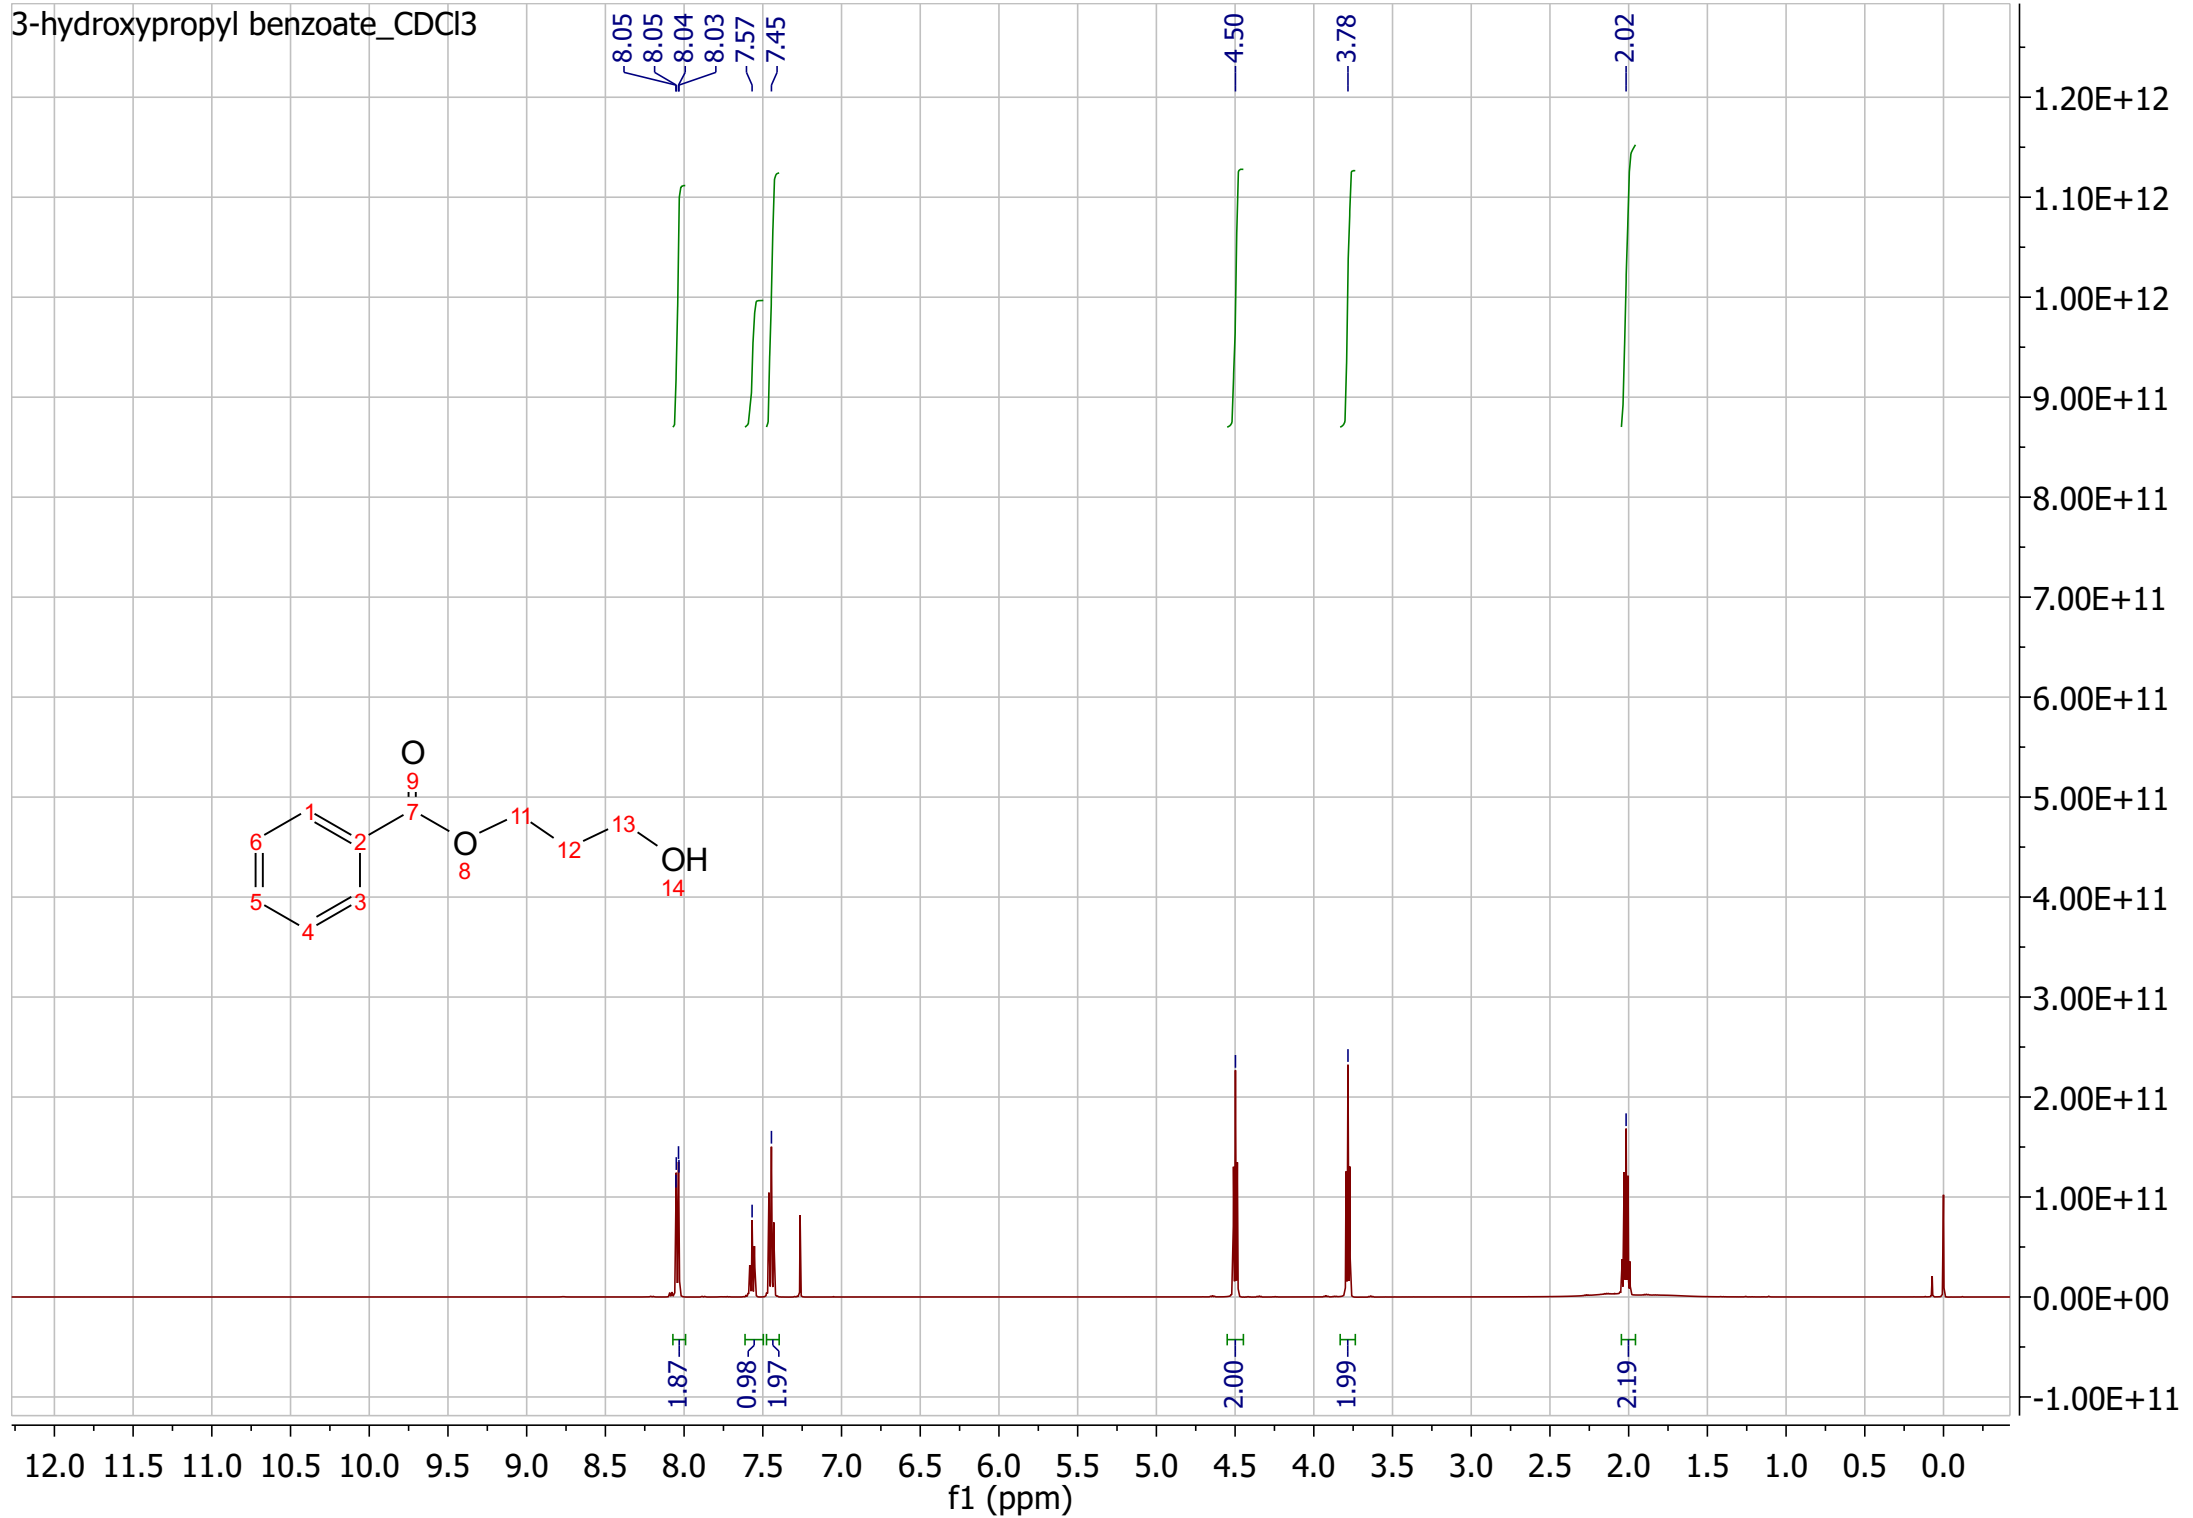

3-hydroxypropyl benzoate\_CDCl3

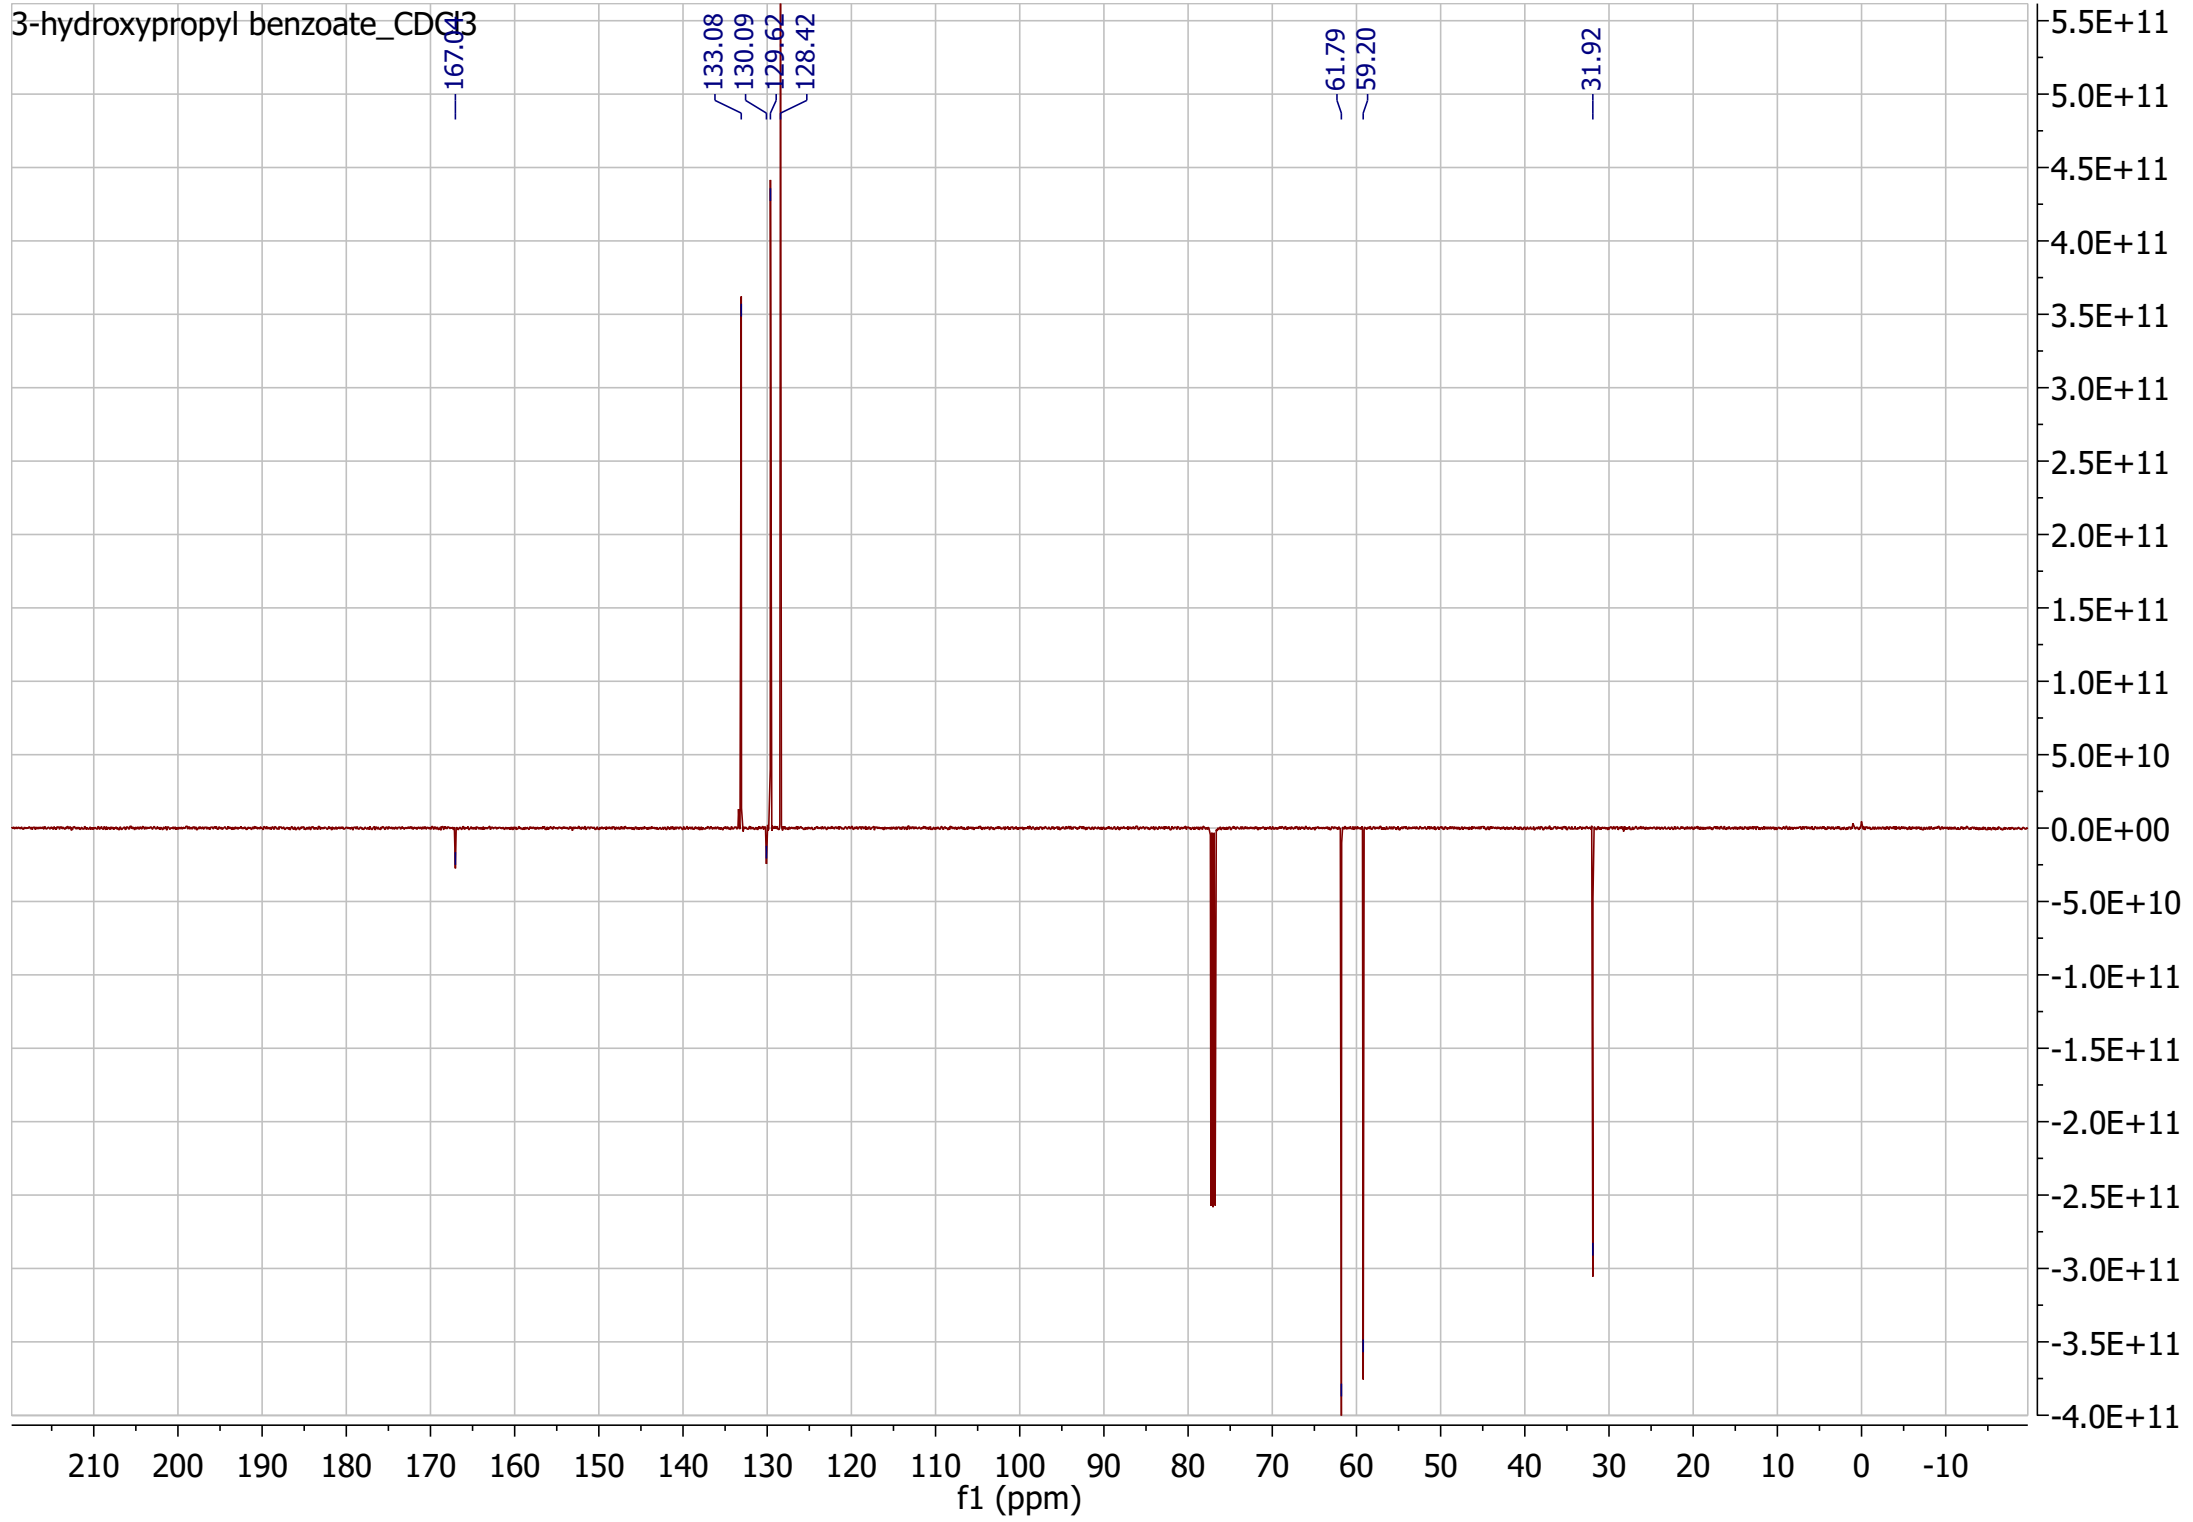

3-hydroxypropyl 3,5-bis(methoxymethoxy)-4-(naphth-2-ylmethoxy)benzoate\_DMSO

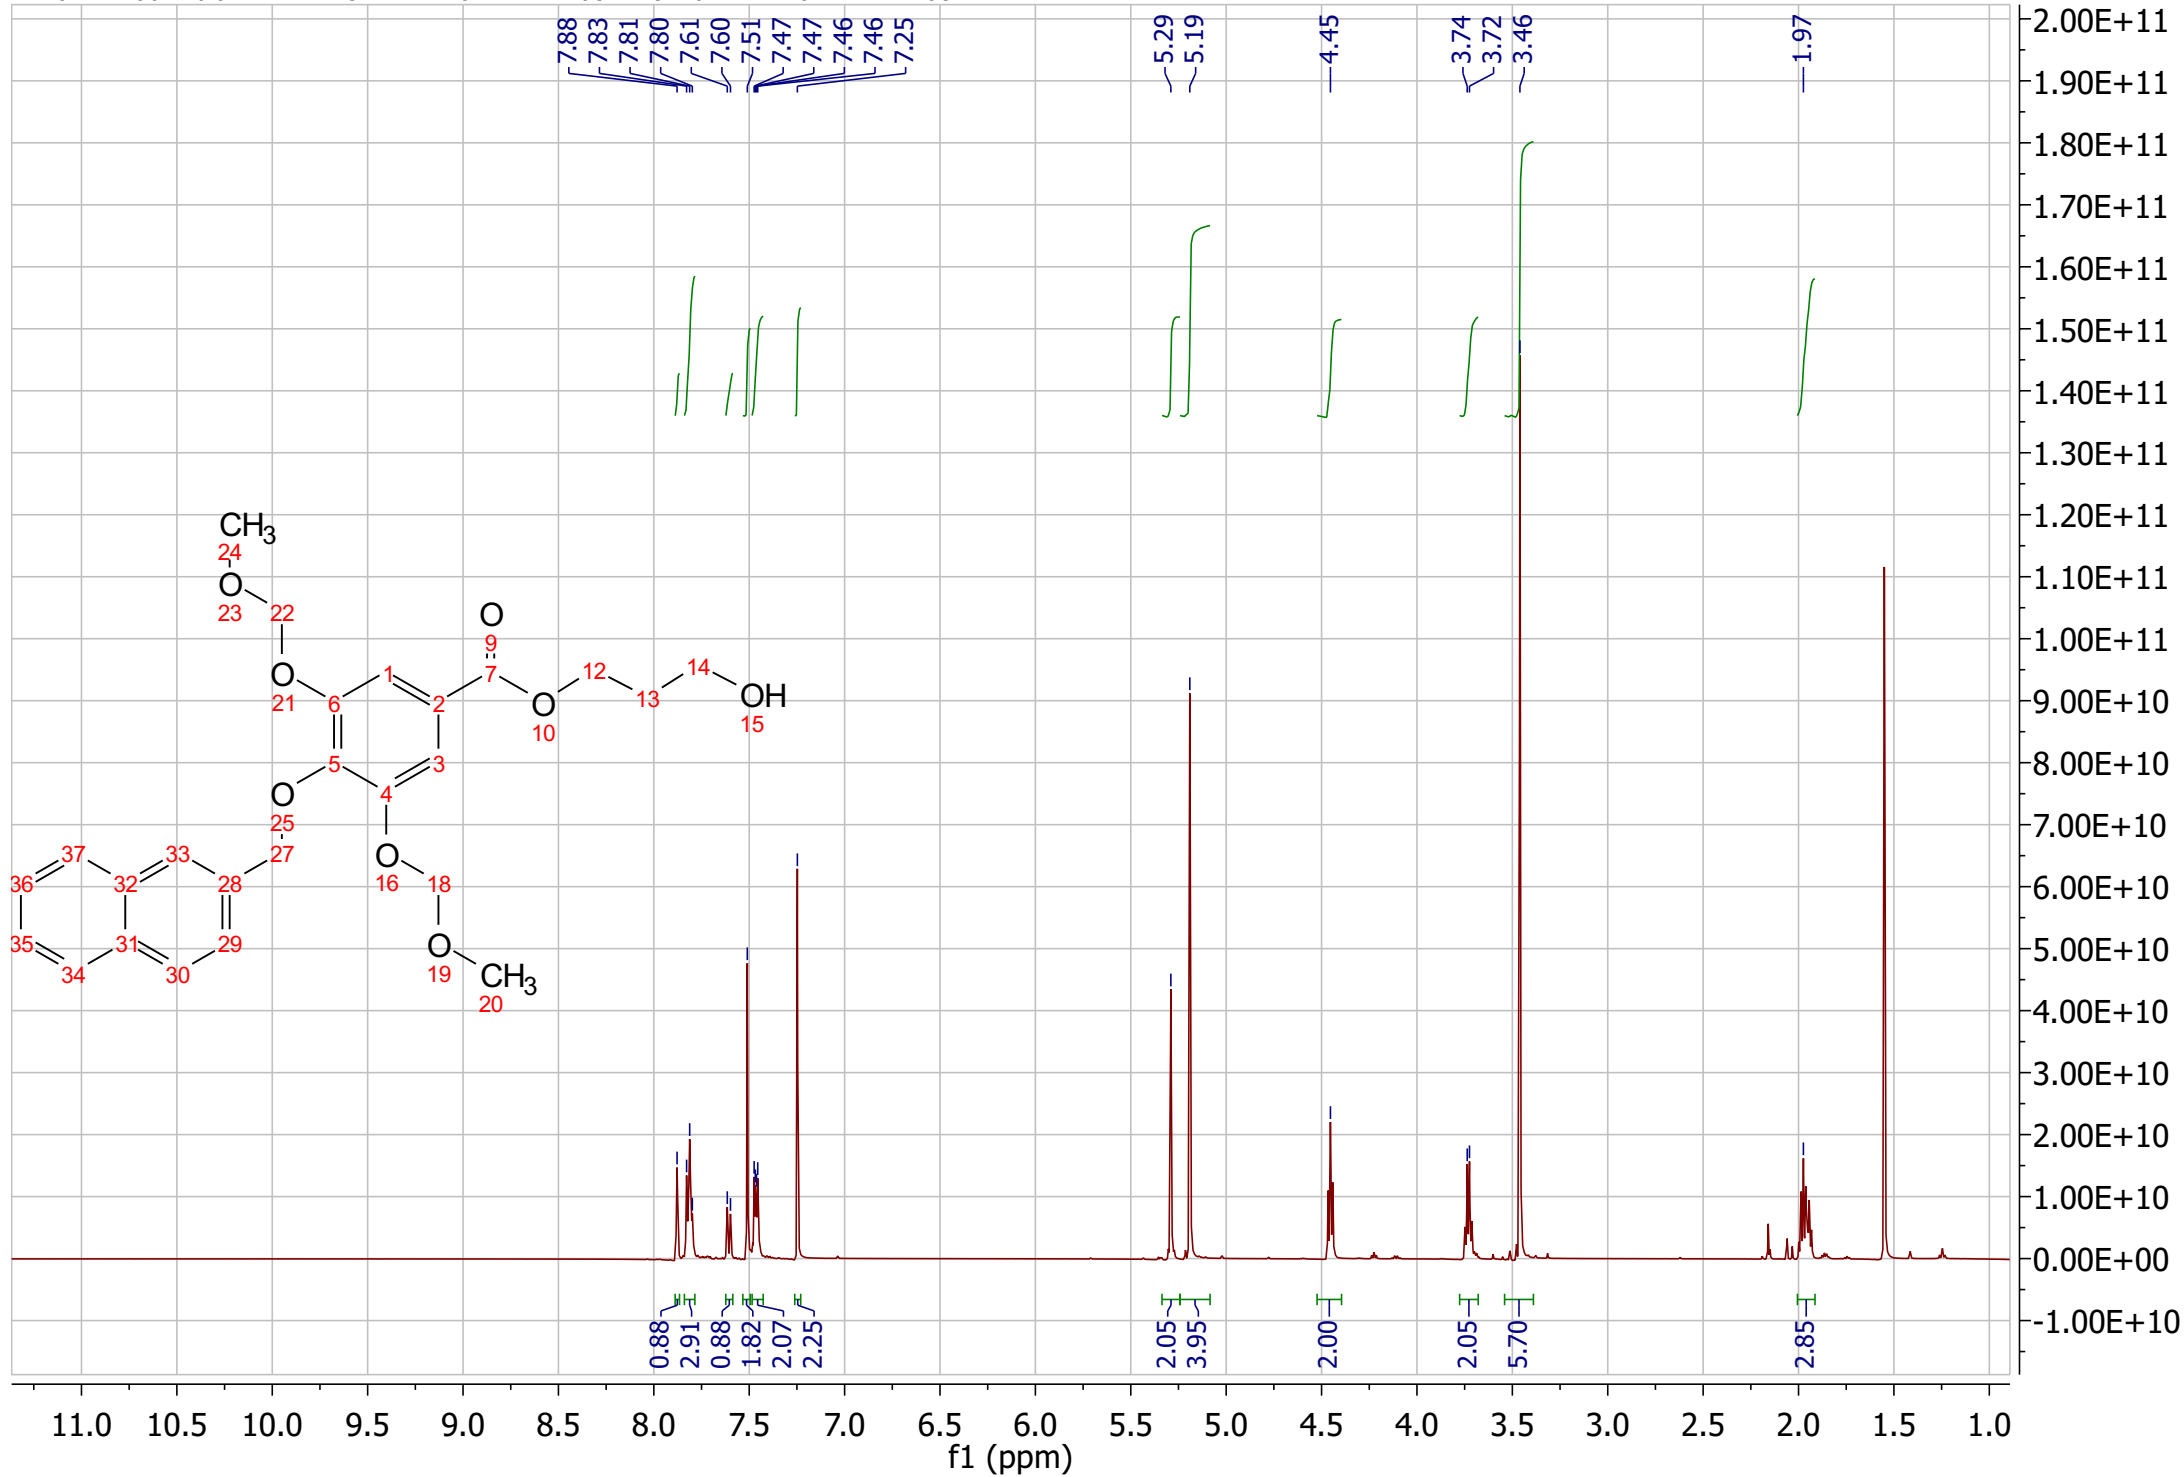

3-hydroxypropyl 3,5-bis(methoxymethoxy)-4-(naphth-2-ylmethoxy)benzoate\_DMSO

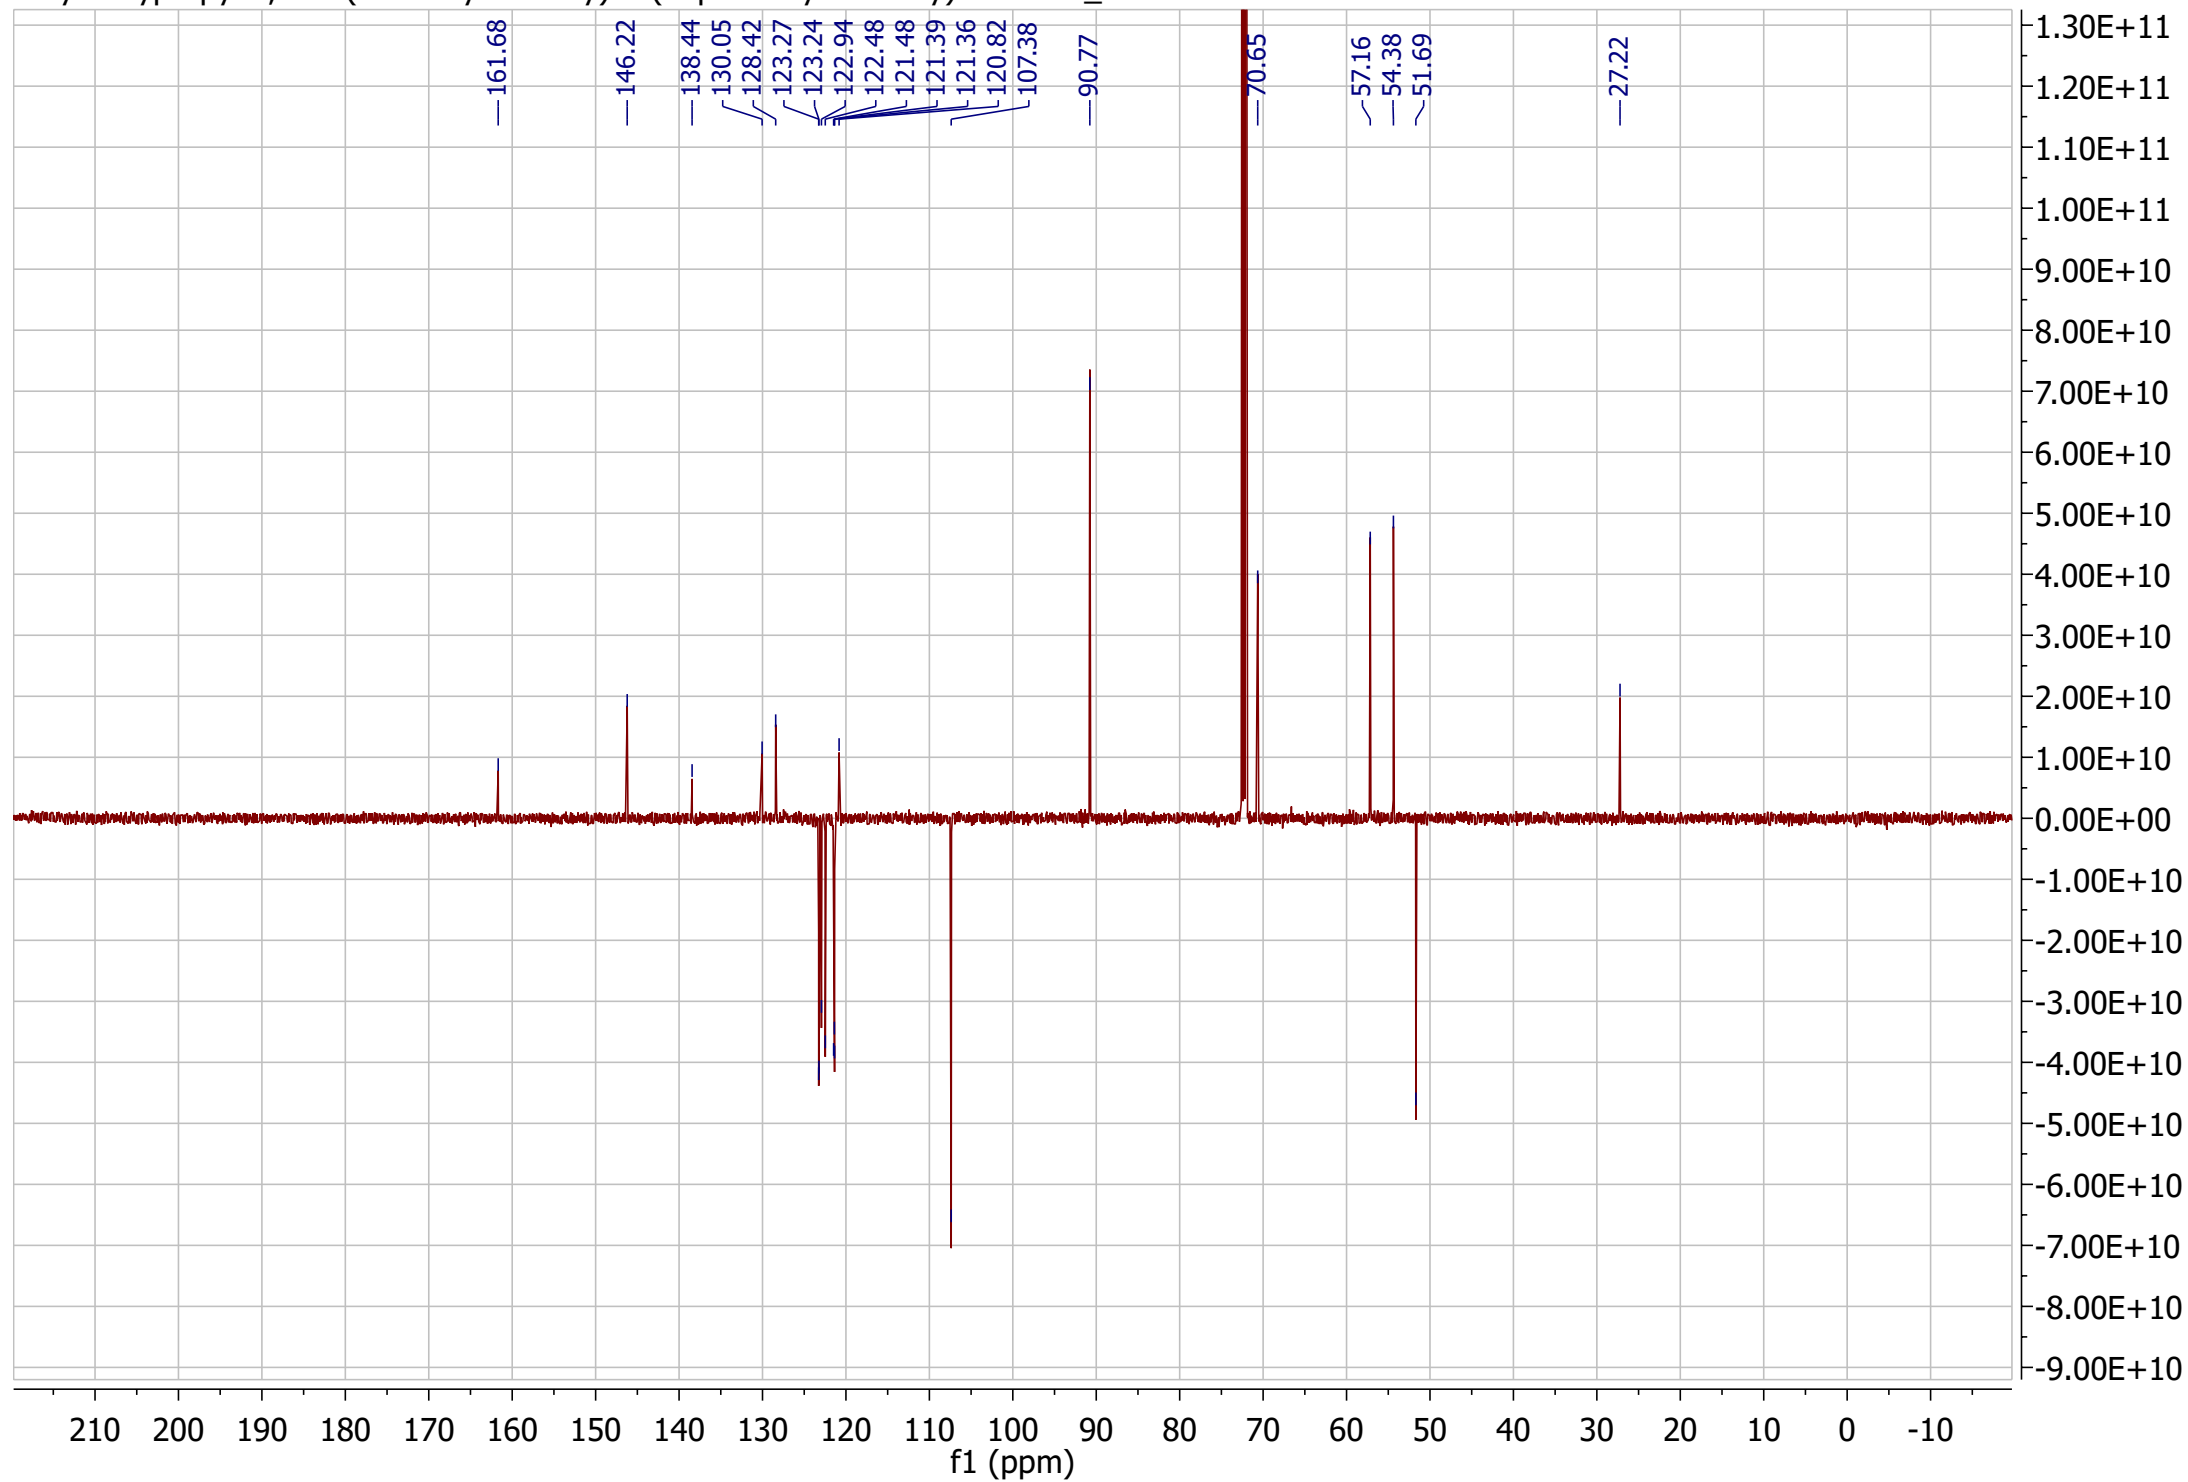

3-hydroxypropyl 3,5-bis(methoxymethoxy)-4-(2-morpholinoethoxy)benzoate\_CDCl3

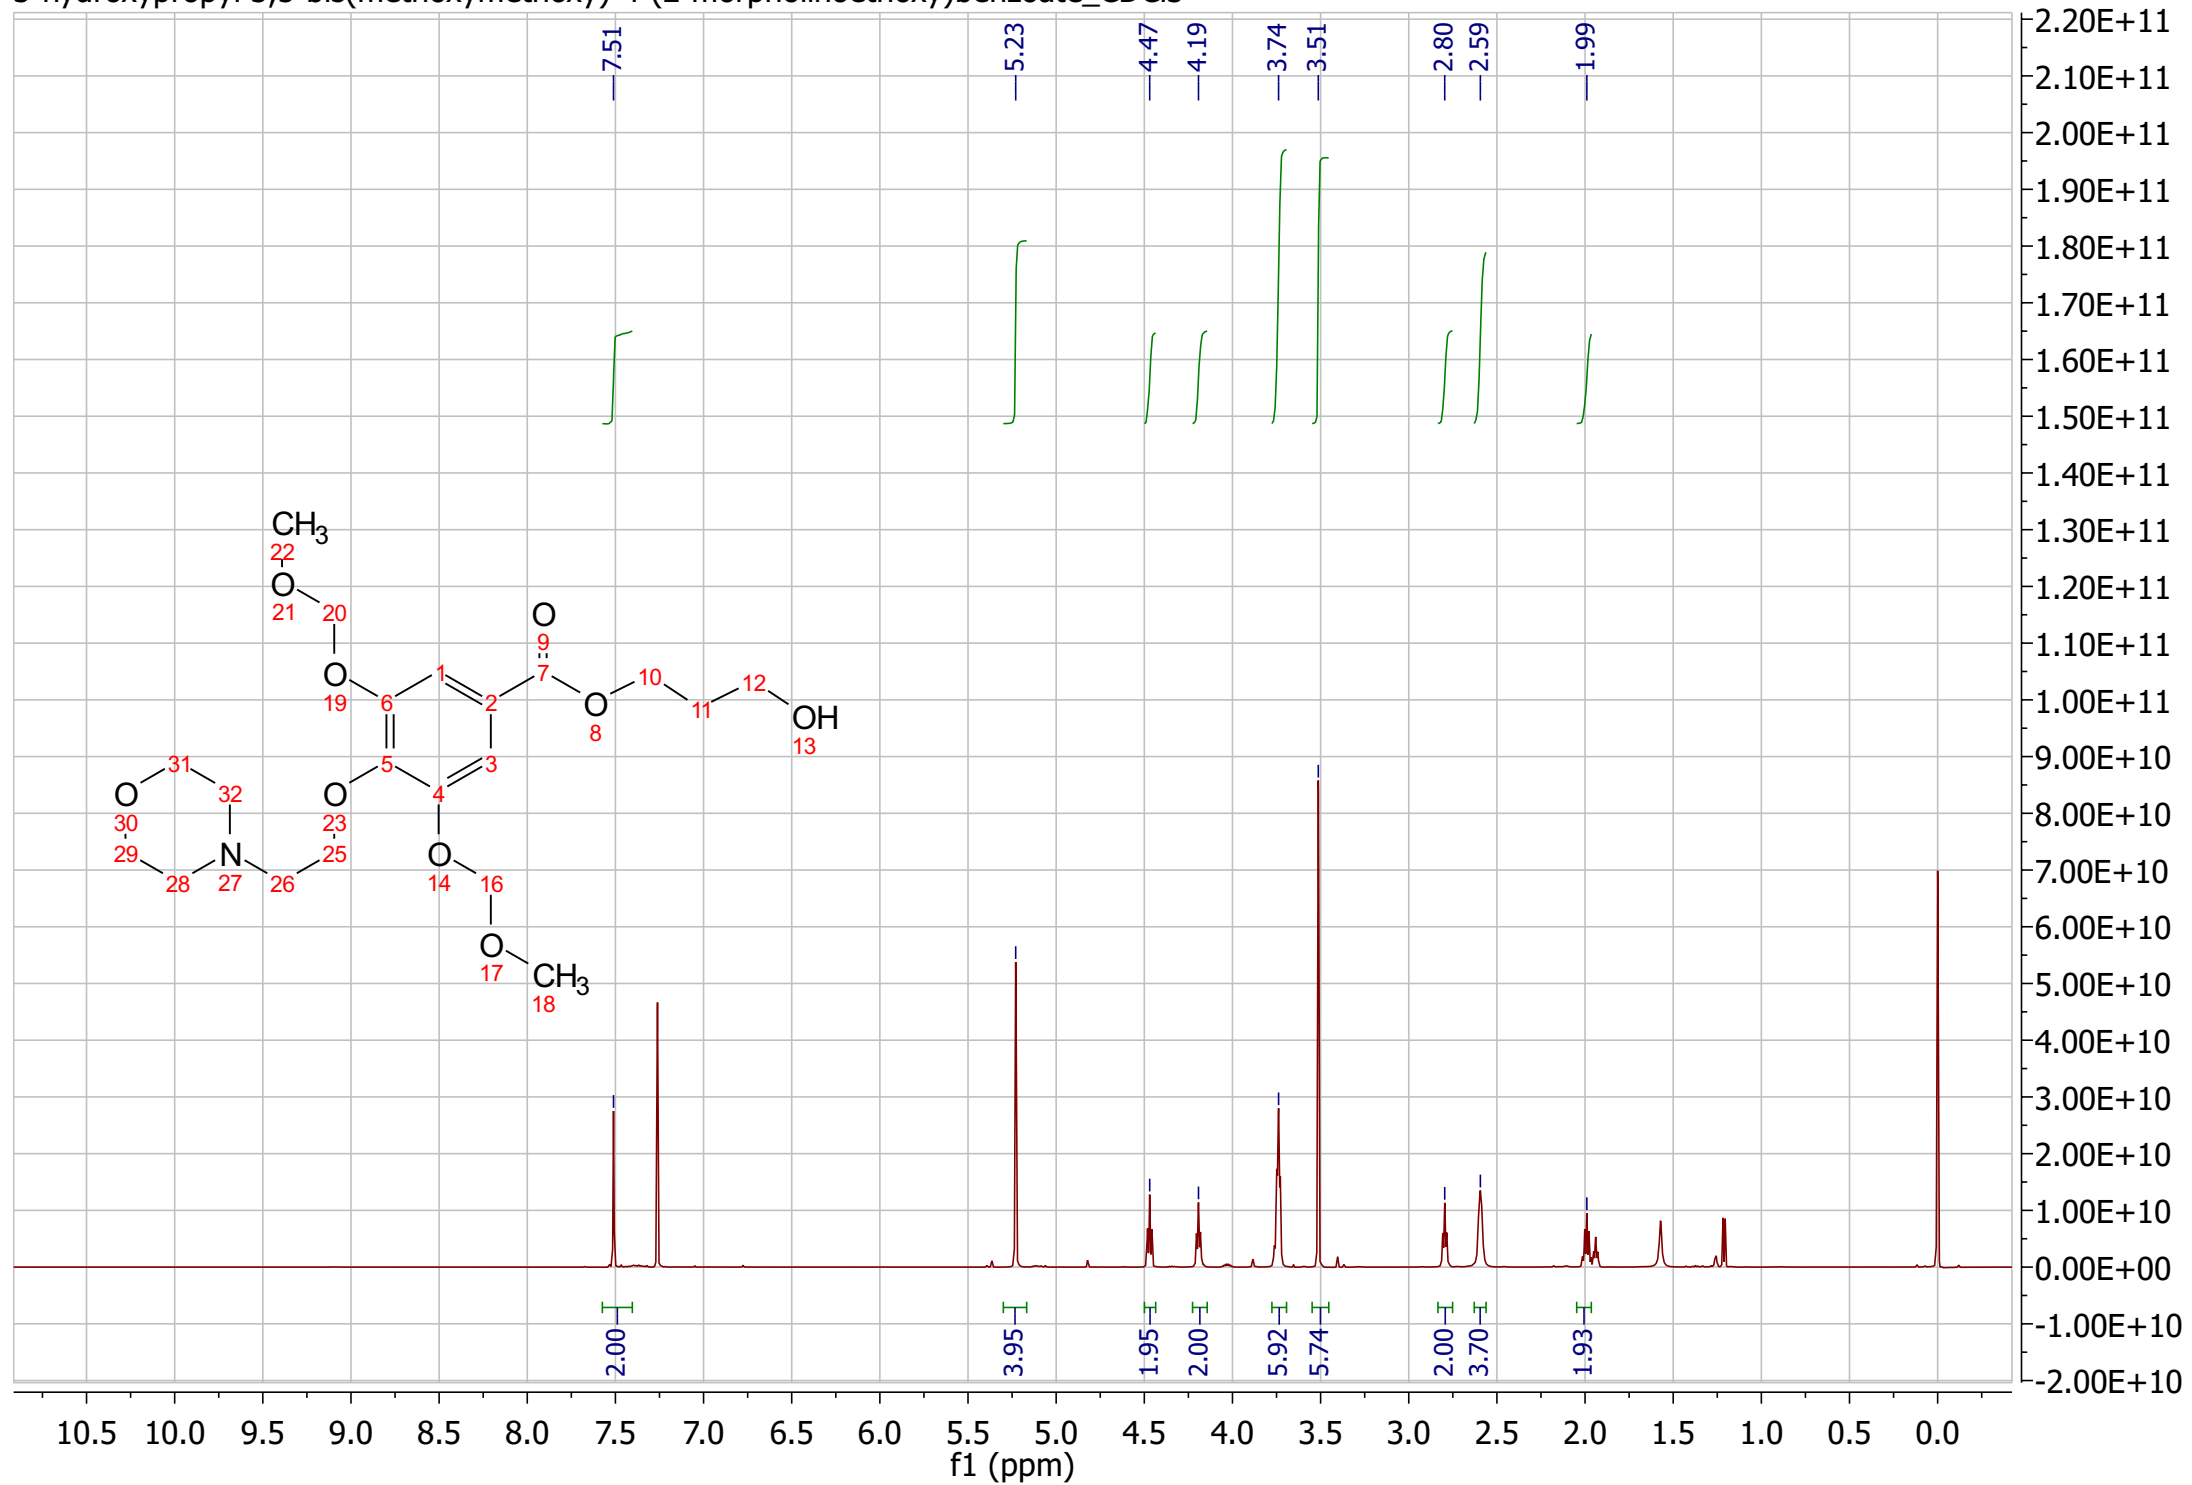

3-hydroxypropyl 3,5-bis(methoxymethoxy)-4-(2-morpholinoethoxy)benzoate\_CDCl3

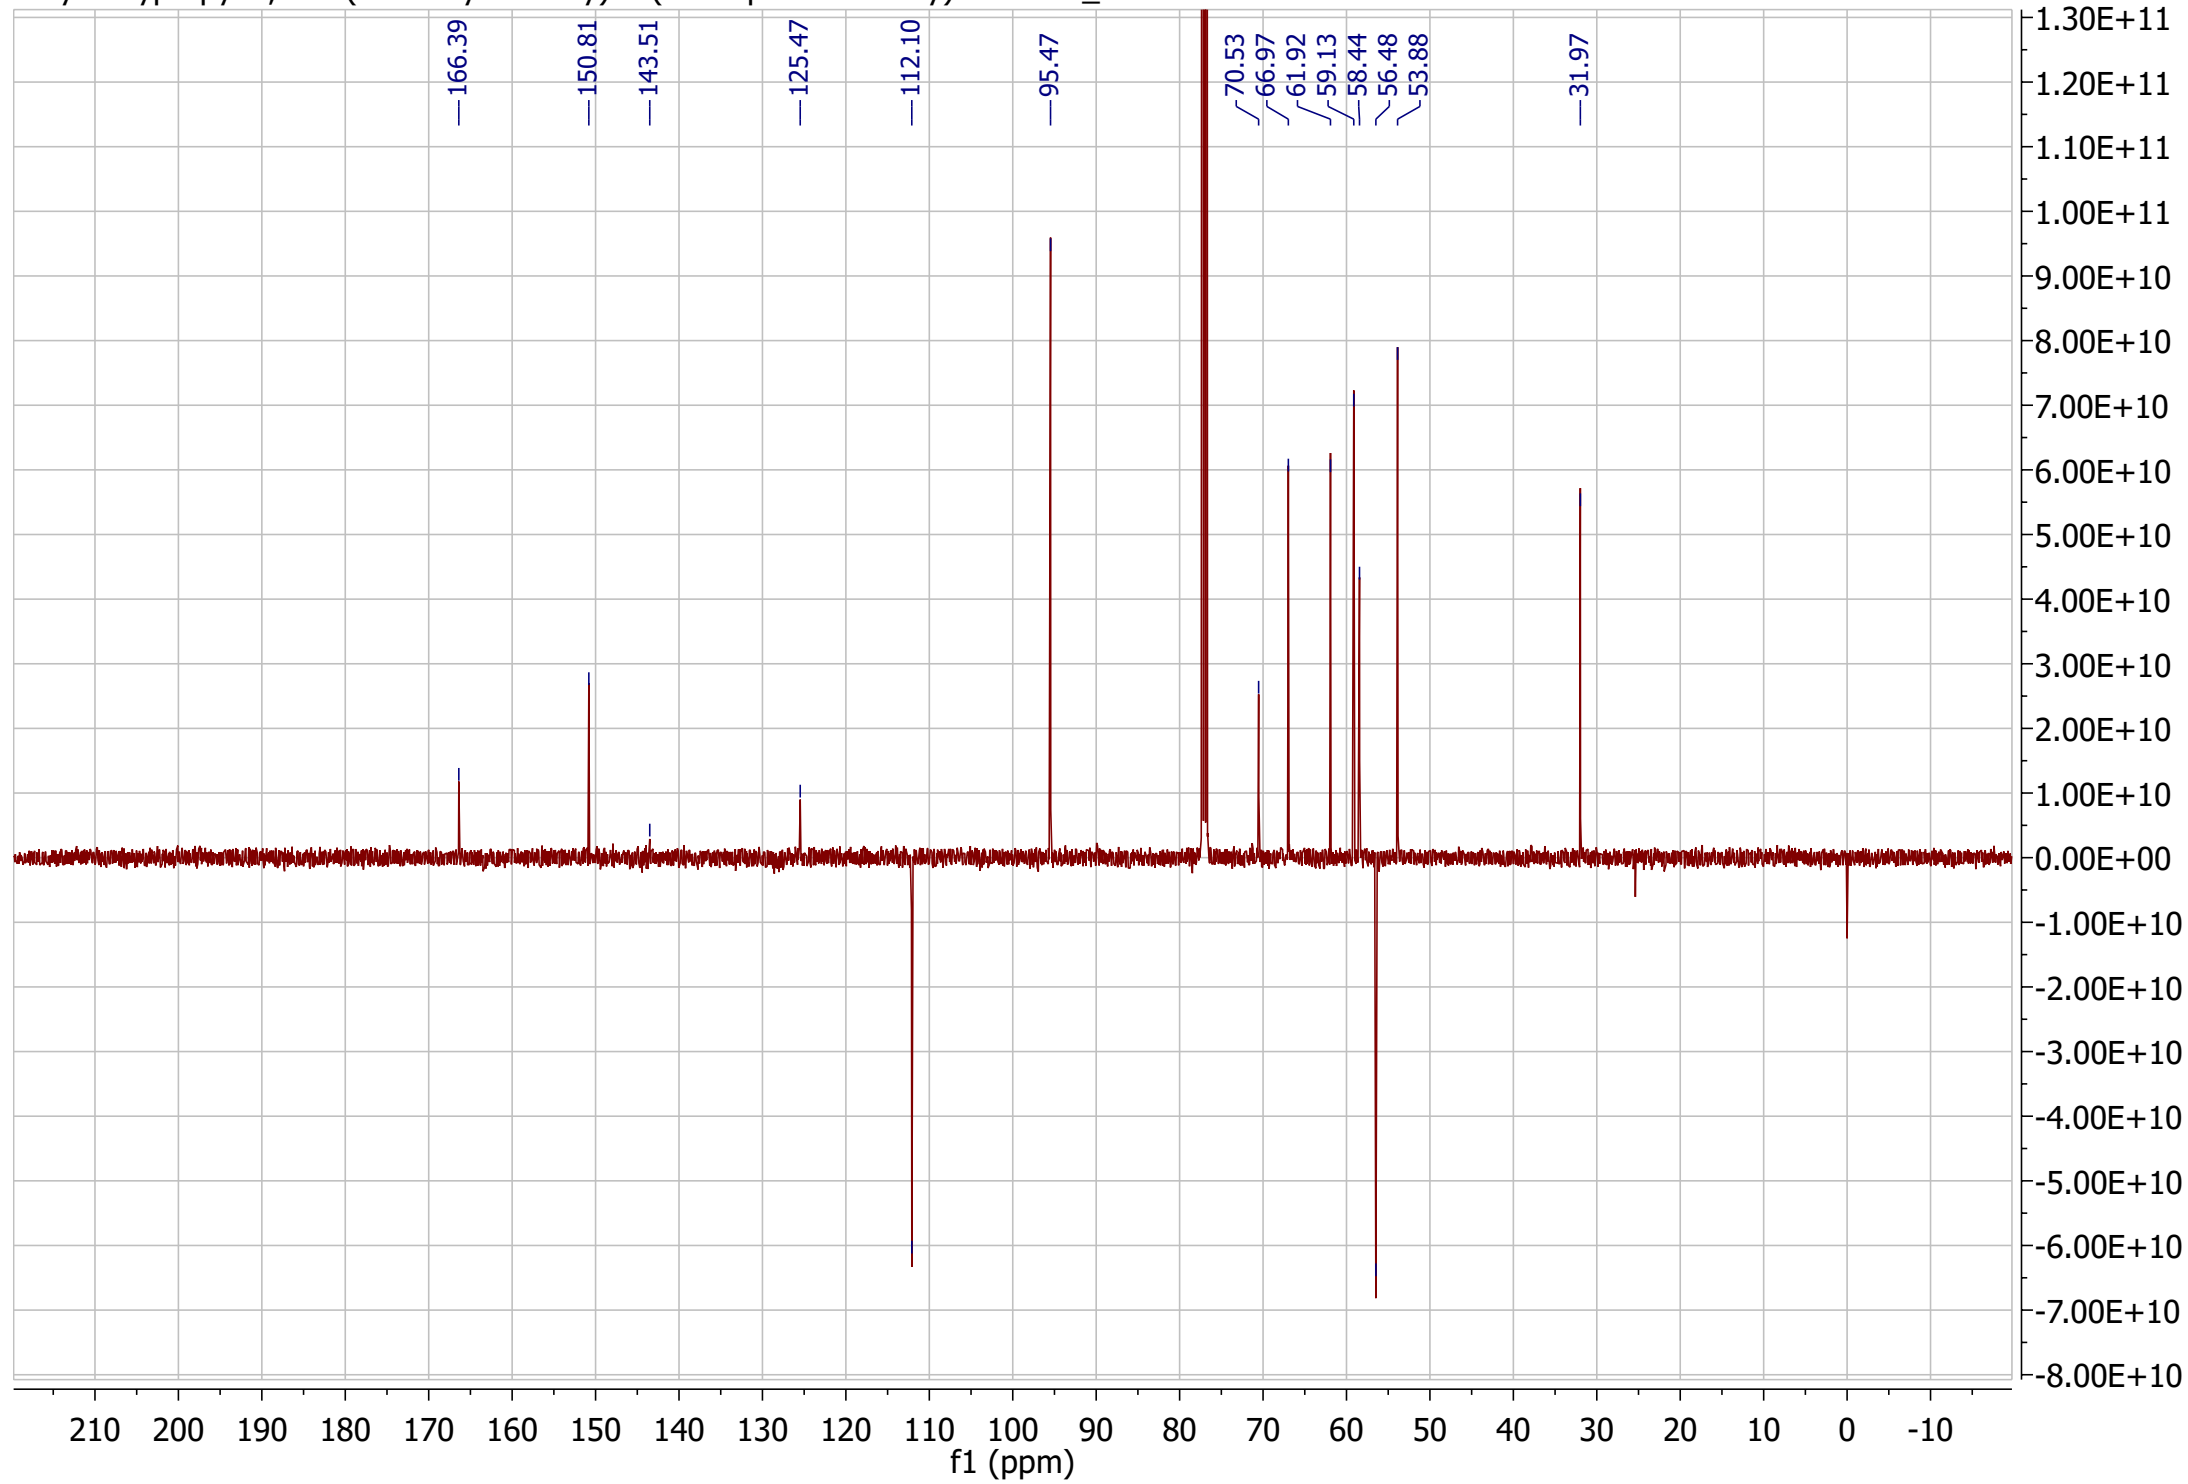

3-hydroxypropyl 4-(2-(benzyloxy)ethoxy)-3,5-bis(methoxymethoxy)benzoate\_CDCl3

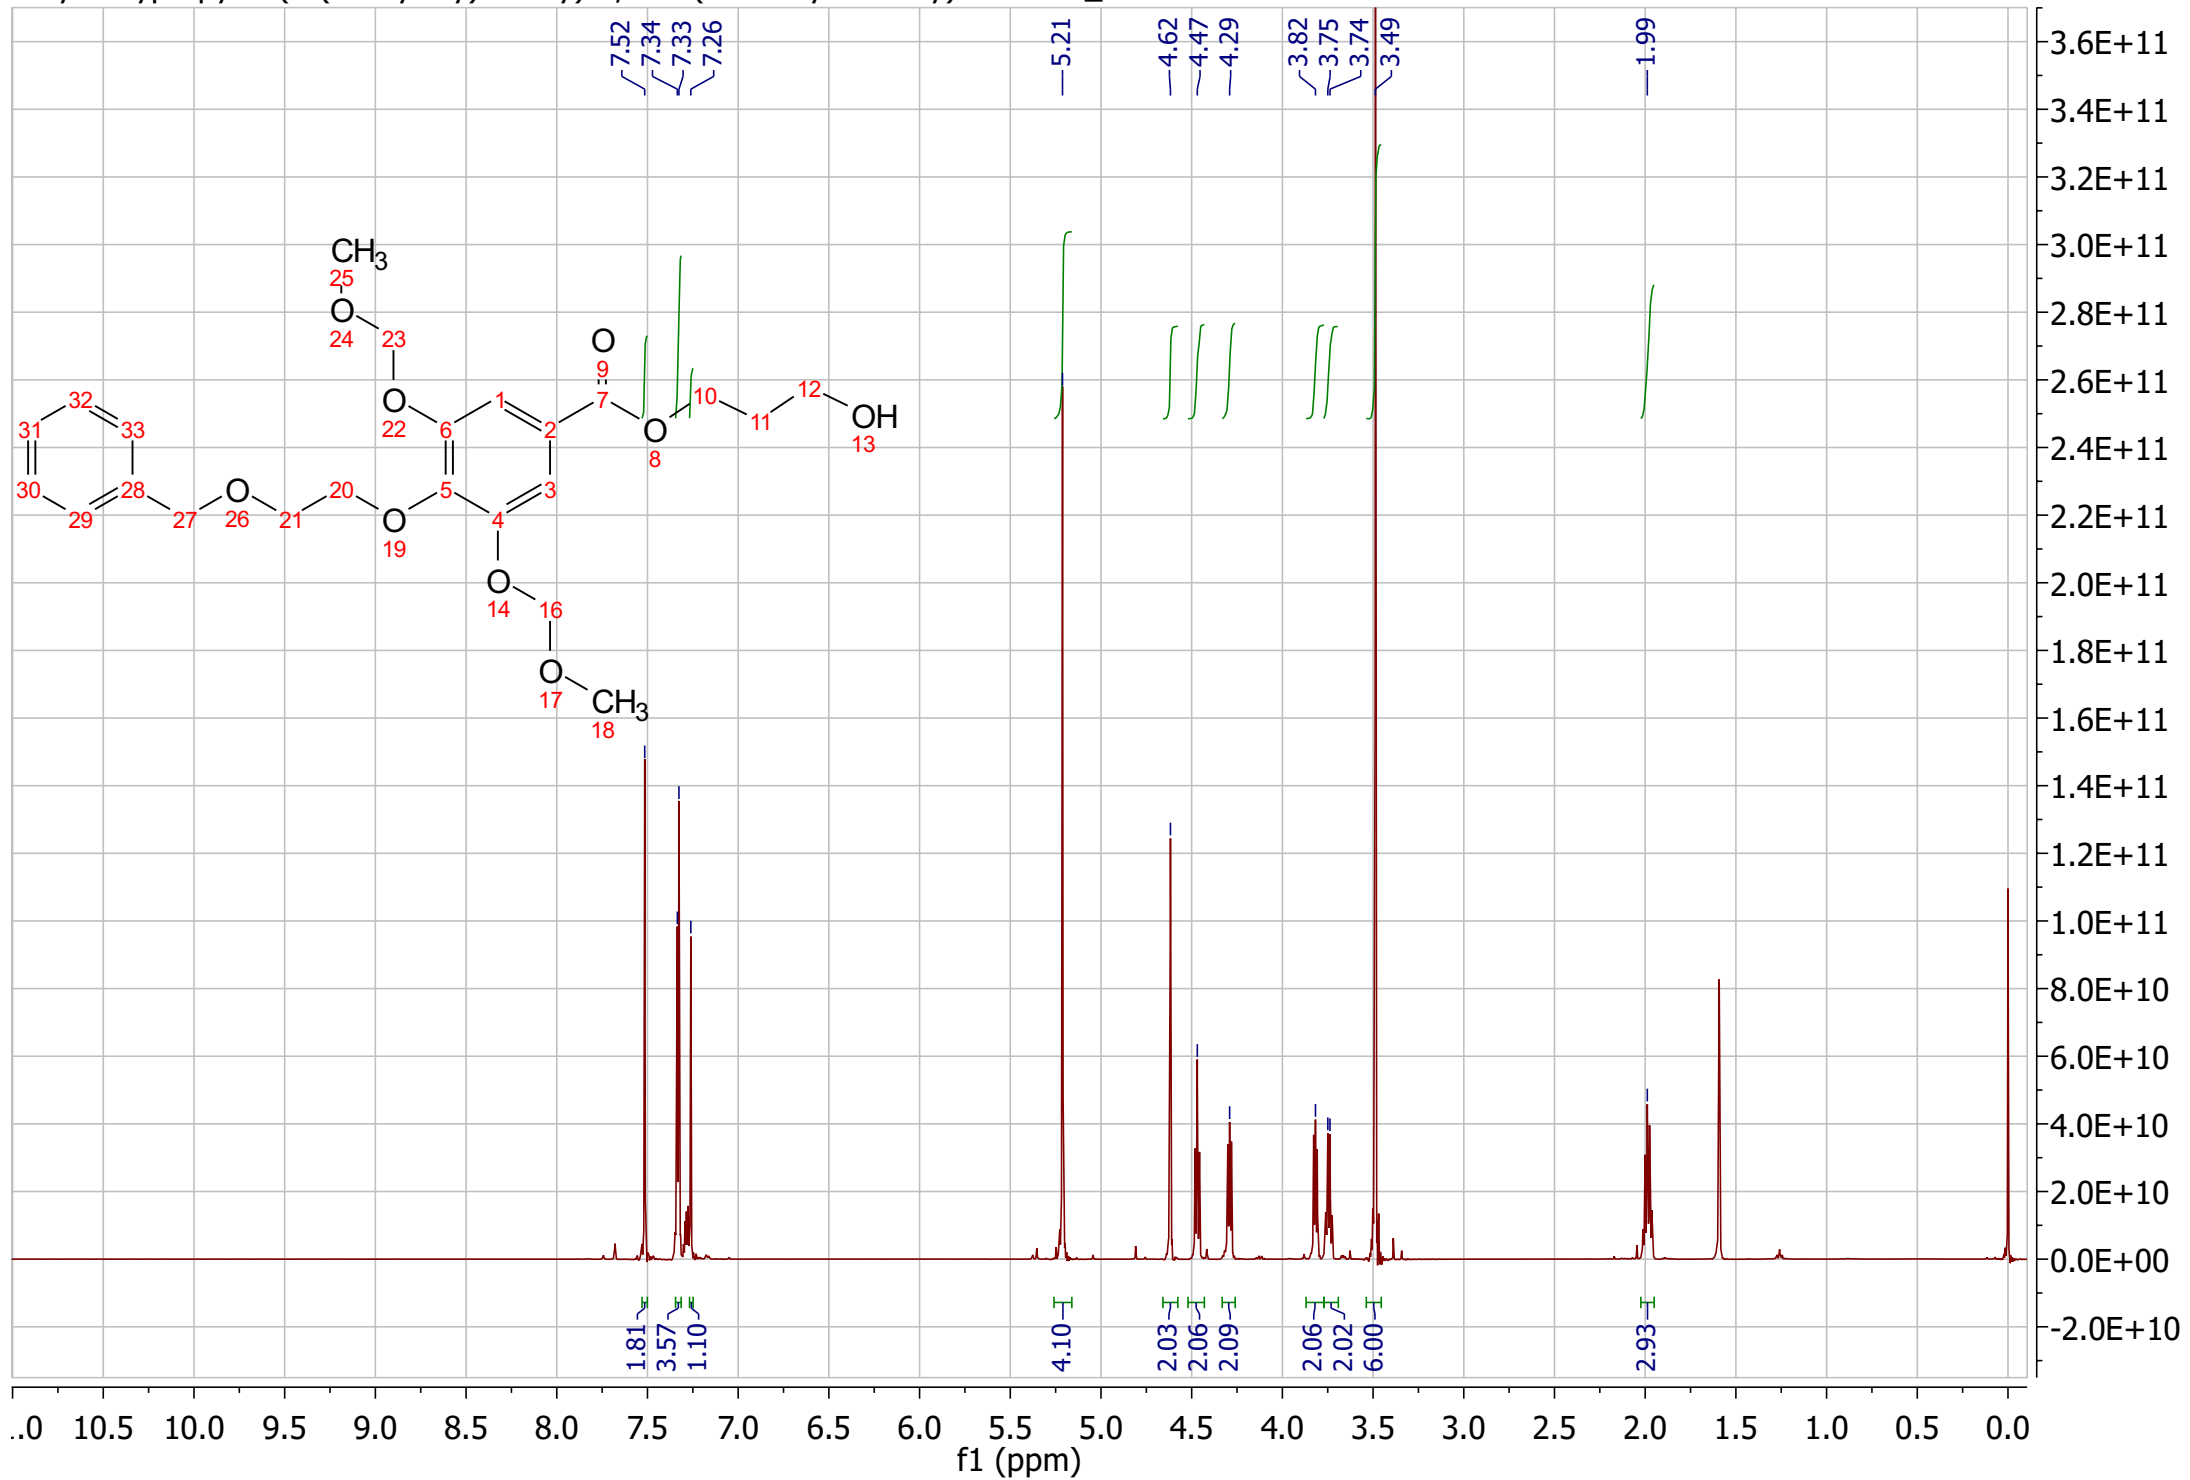

3-hydroxypropyl 4-(2-(benzyloxy)ethoxy)-3,5-bis(methoxymethoxy)benzoate\_CDCl3

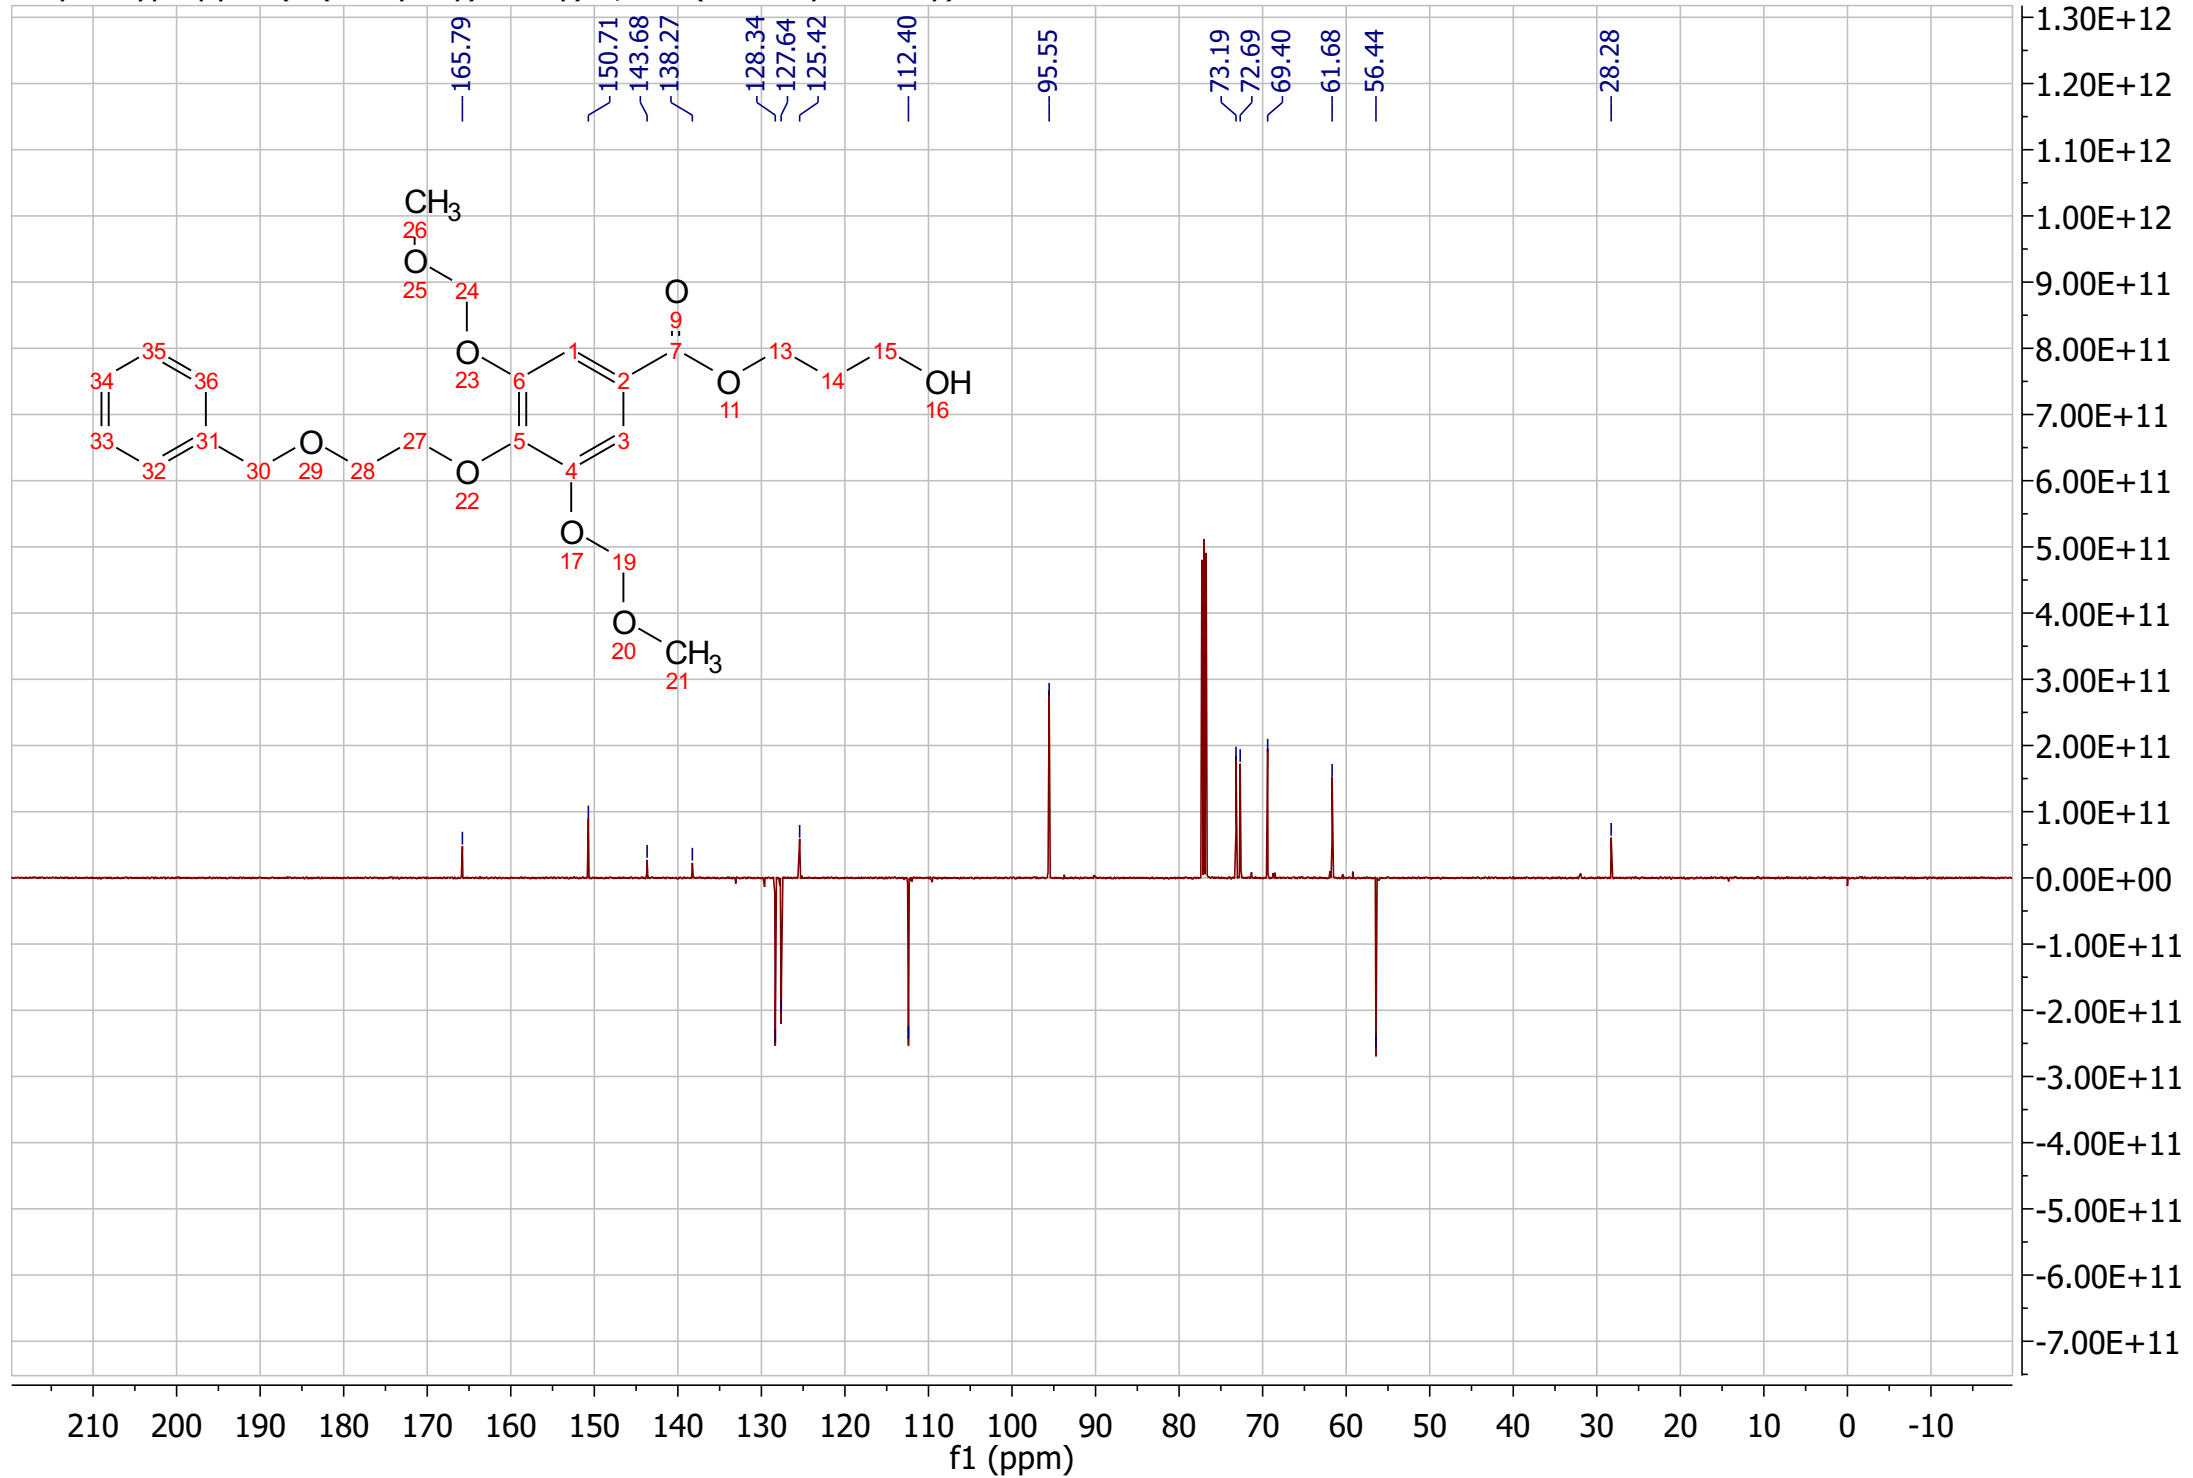



Propane-1,3-diyl bis(4-(benzyloxy)-3,5-bis(methoxymethoxy)benzoate)\_DMSO

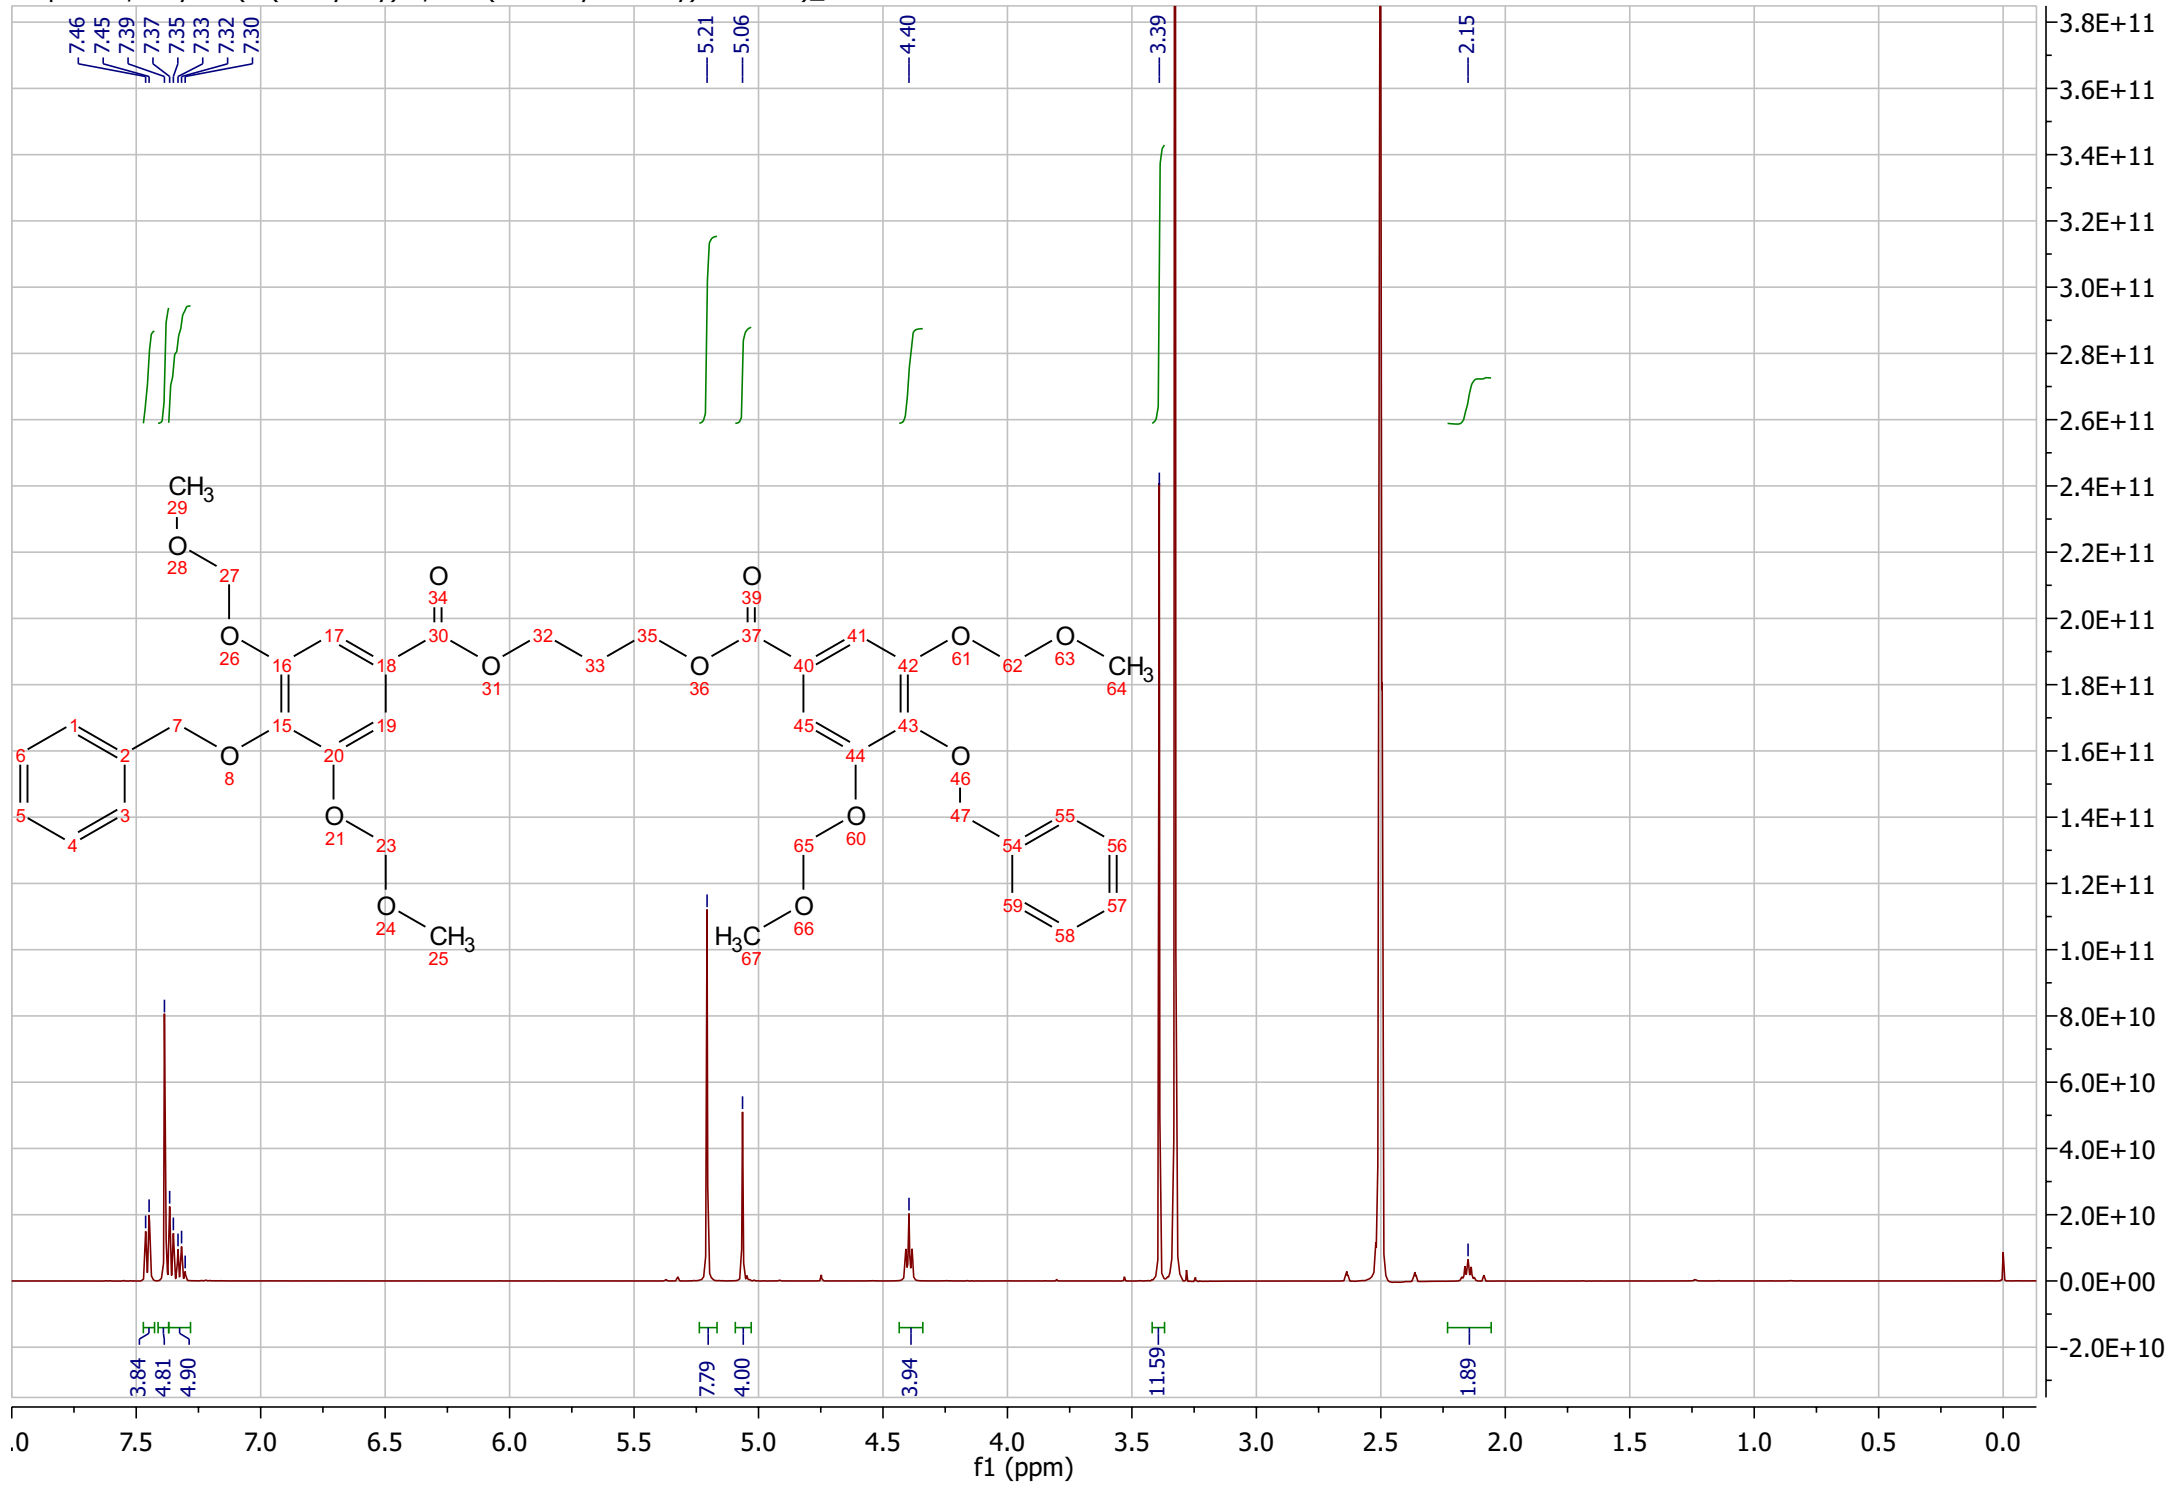

Propane-1,3-diyl bis(4-(benzyloxy)-3,5-bis(methoxymethoxy)benzoate)\_DMSO

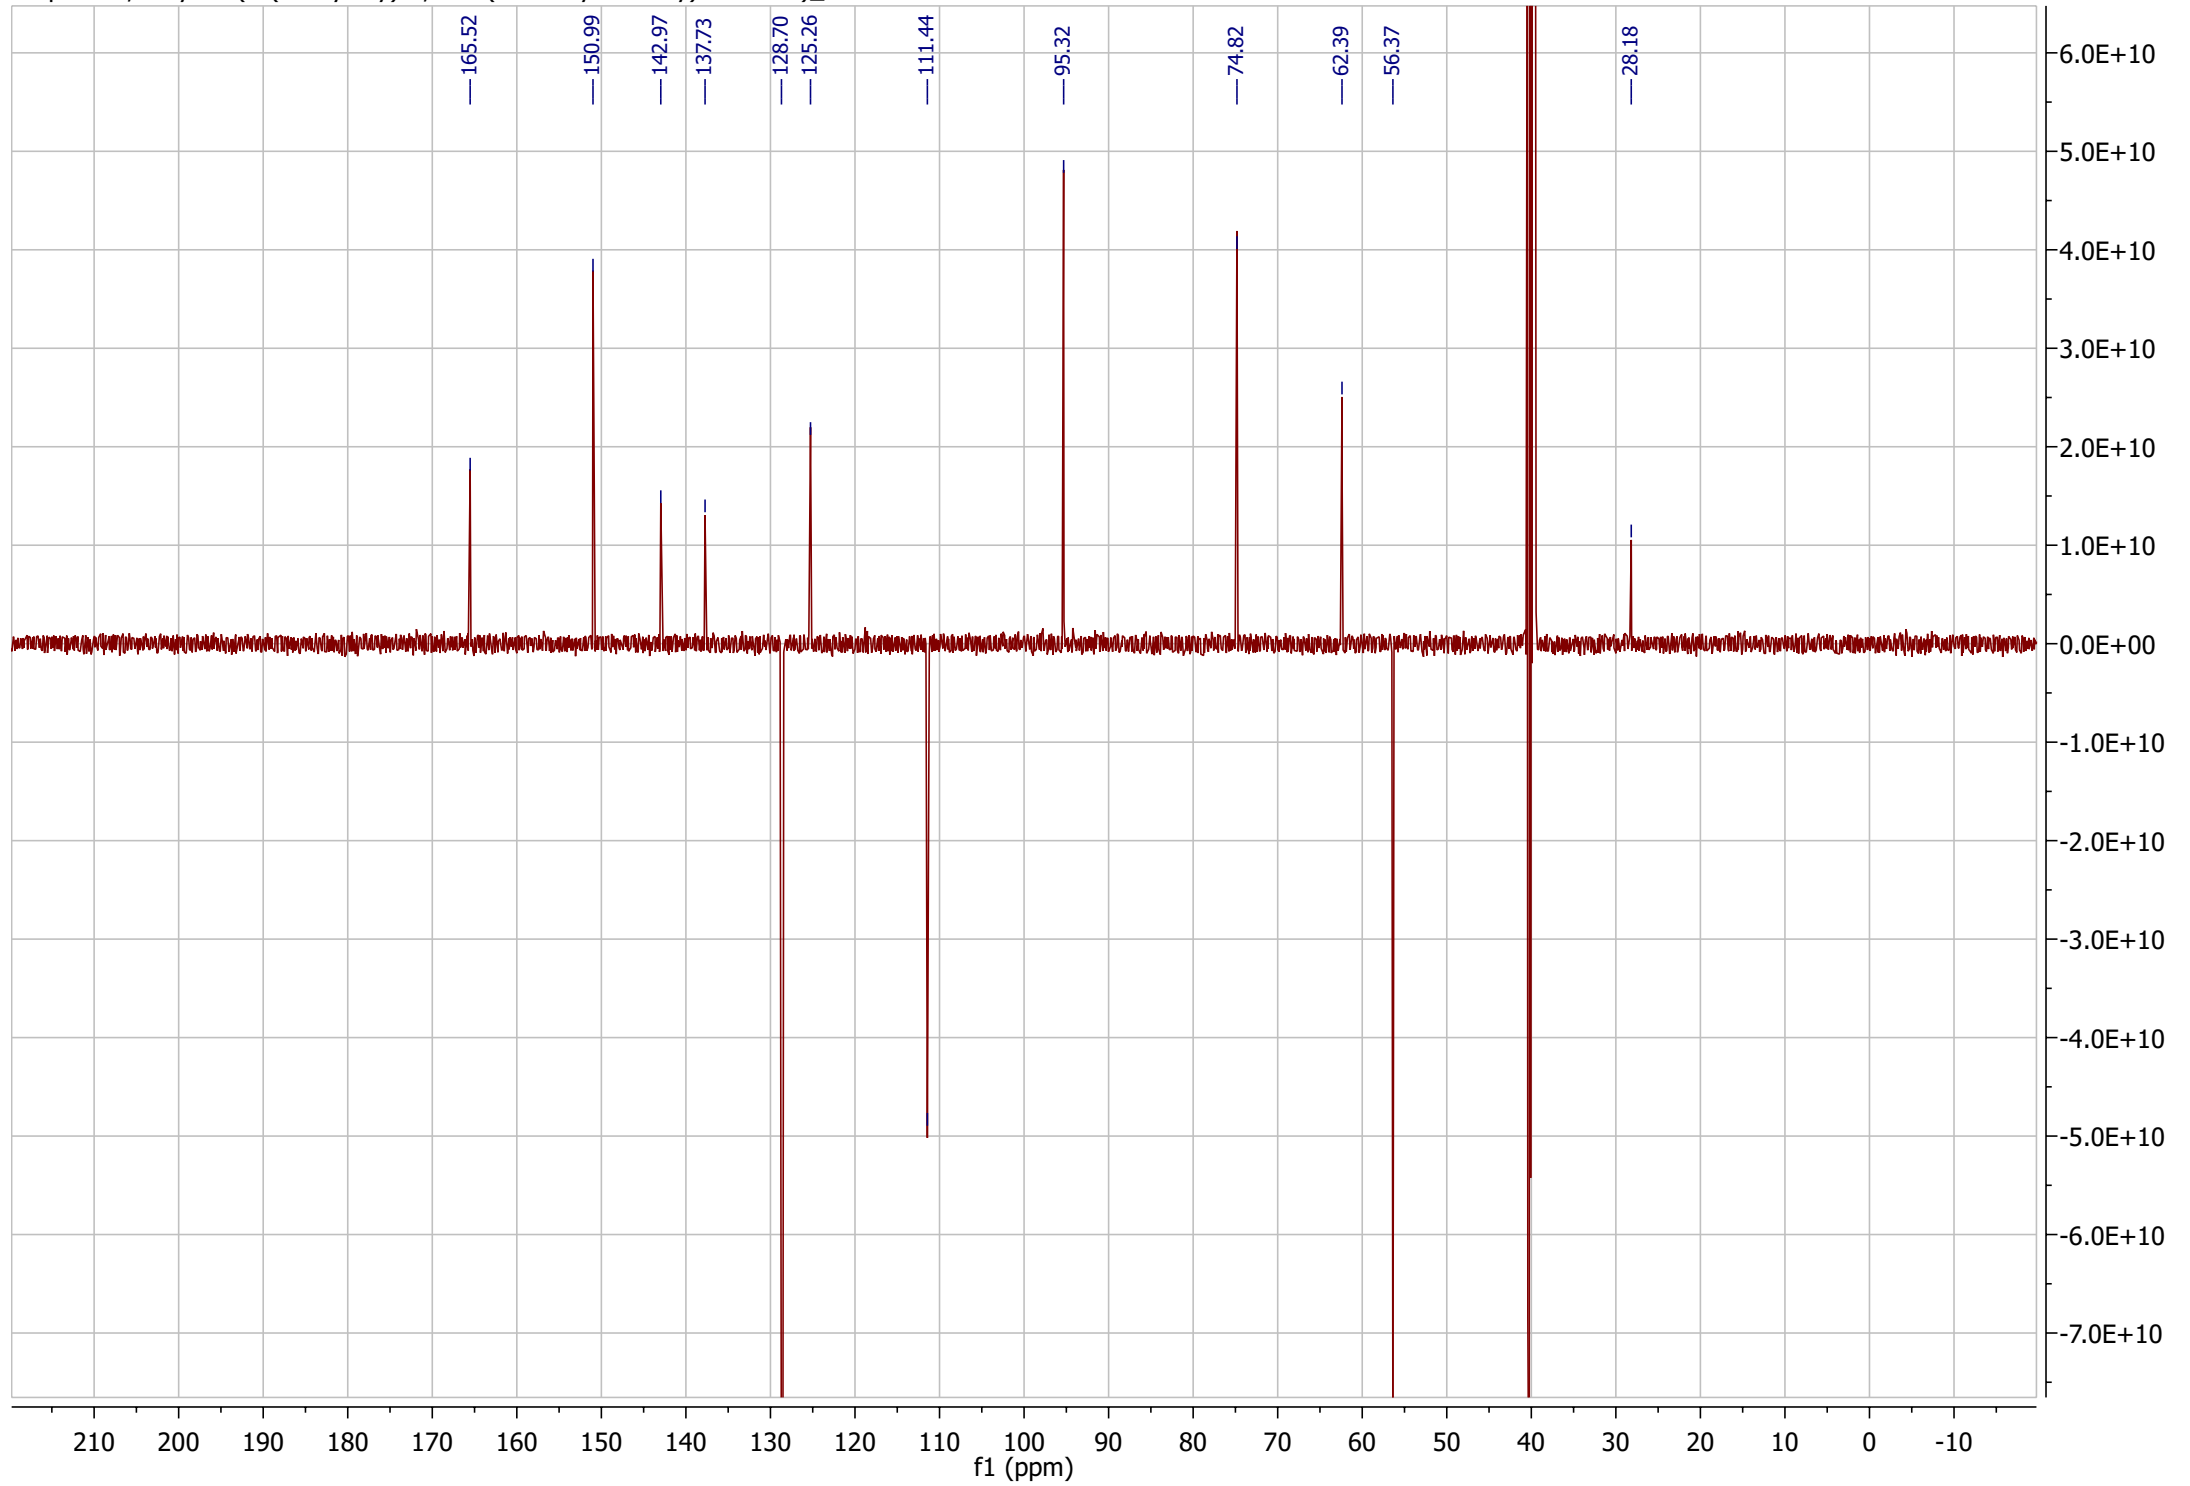

Propane-1,3-diyl bis(3,5-bis(methoxymethoxy)-4-(naphth-2-ylmethoxy)benzoate)\_DMSO

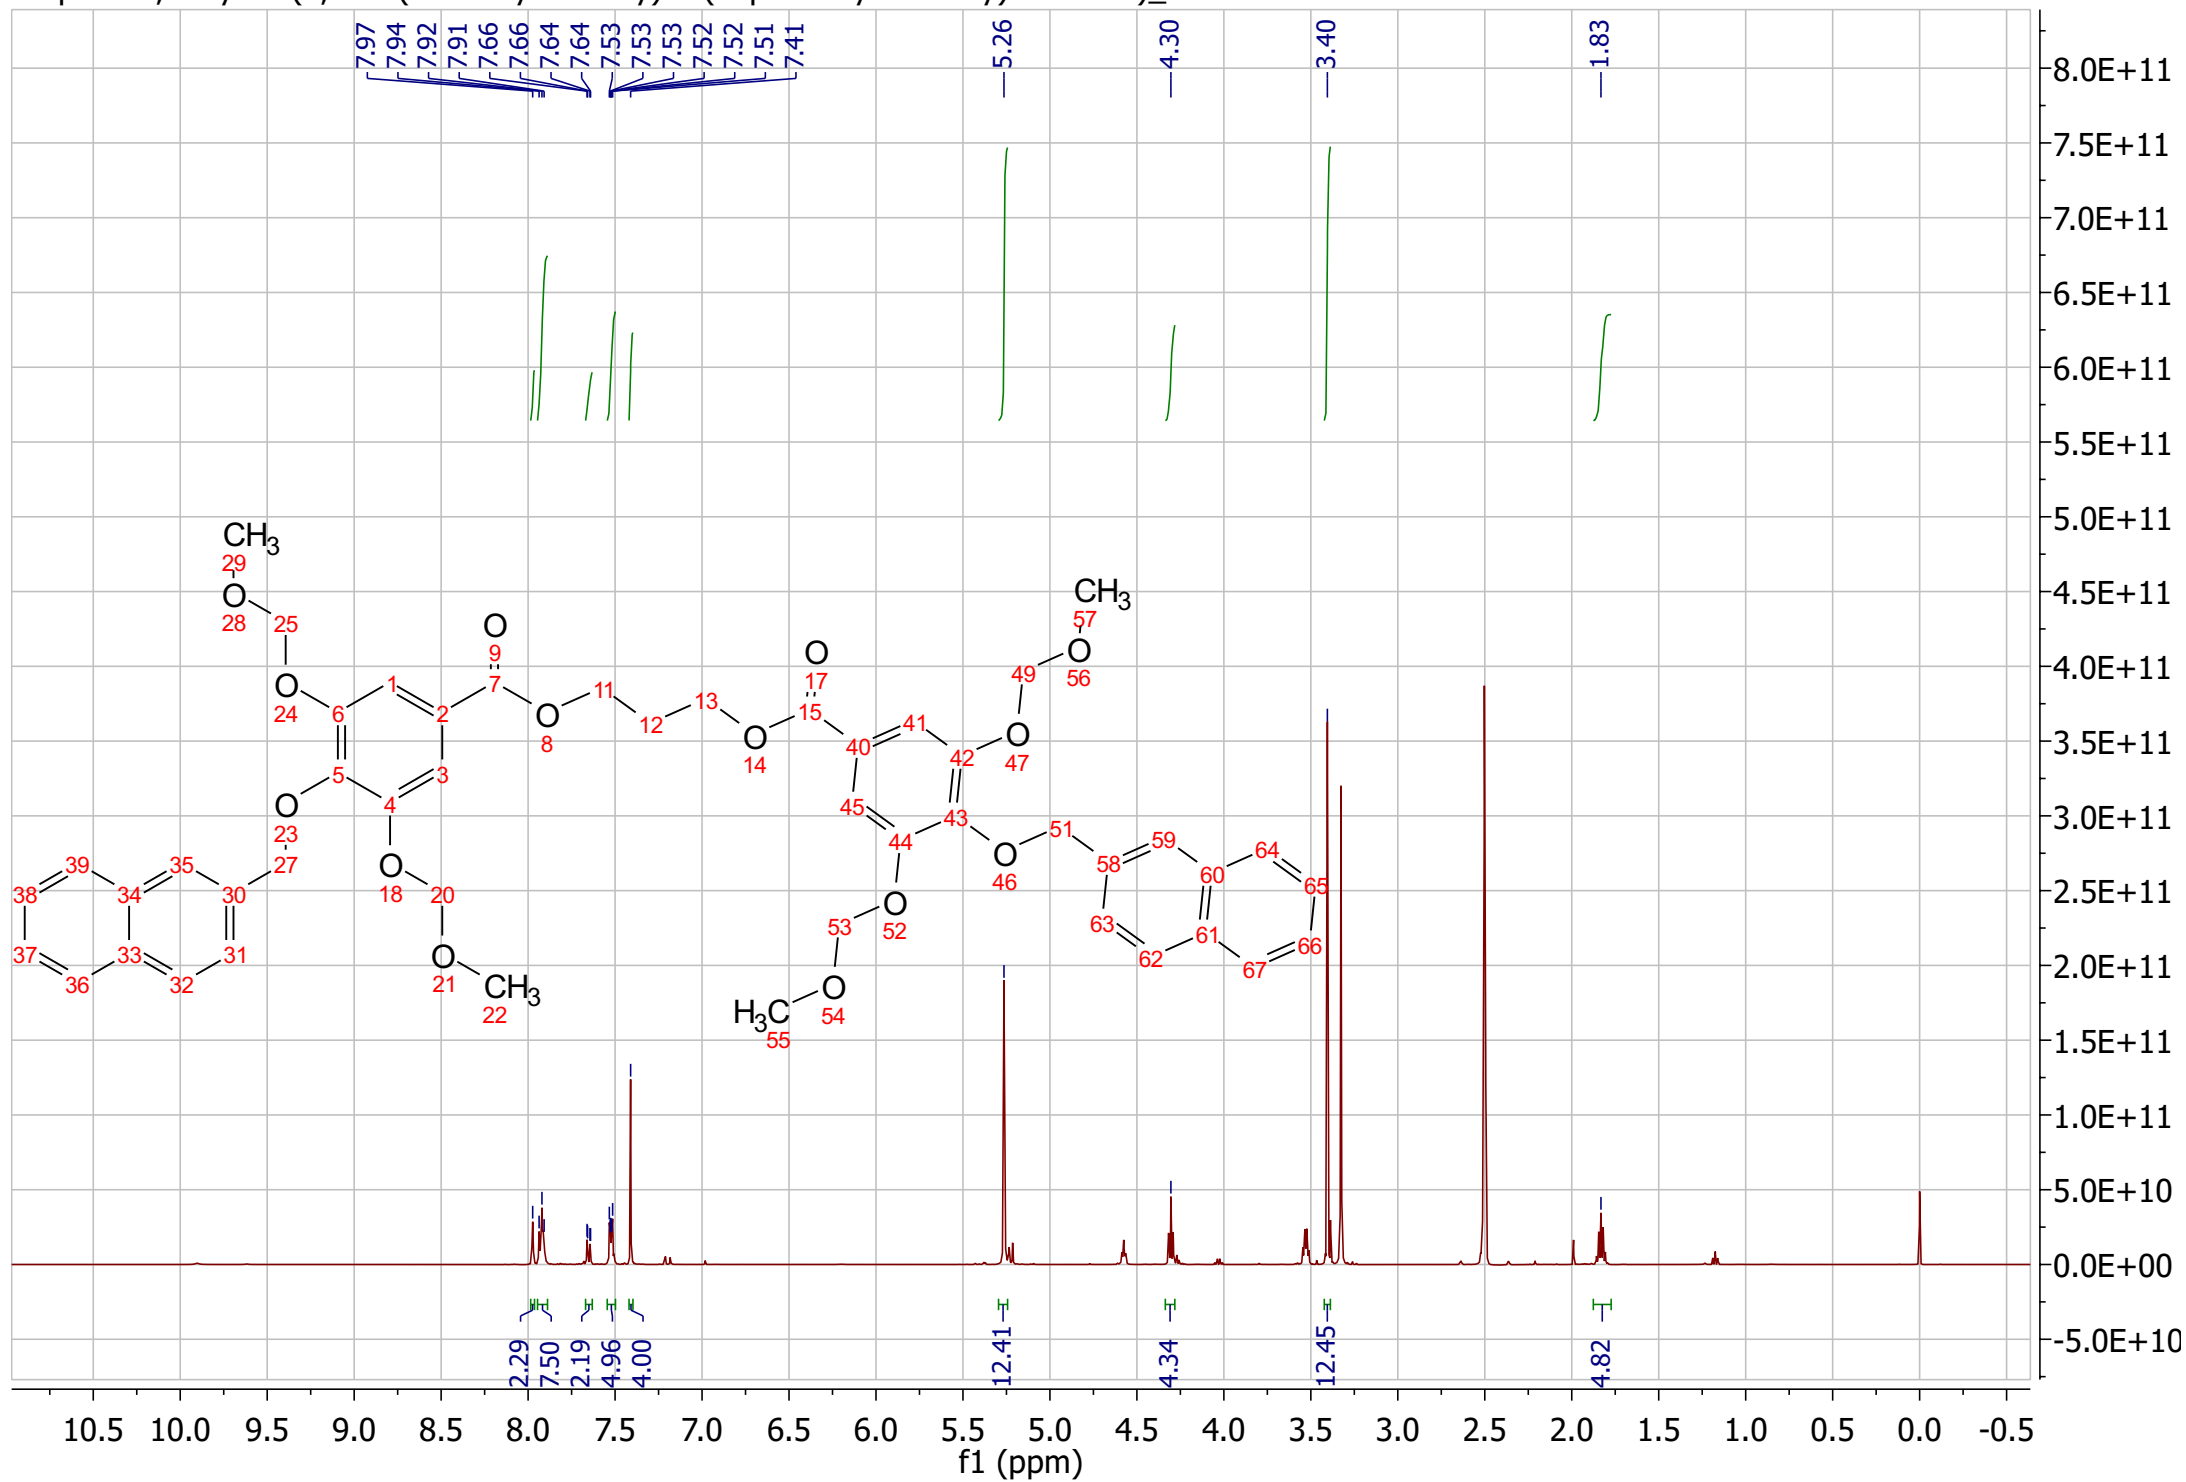

Propane-1,3-diyl bis(4-(2-(benzyloxy)ethoxy)-3,5-bis(methoxymethoxy)benzoate)

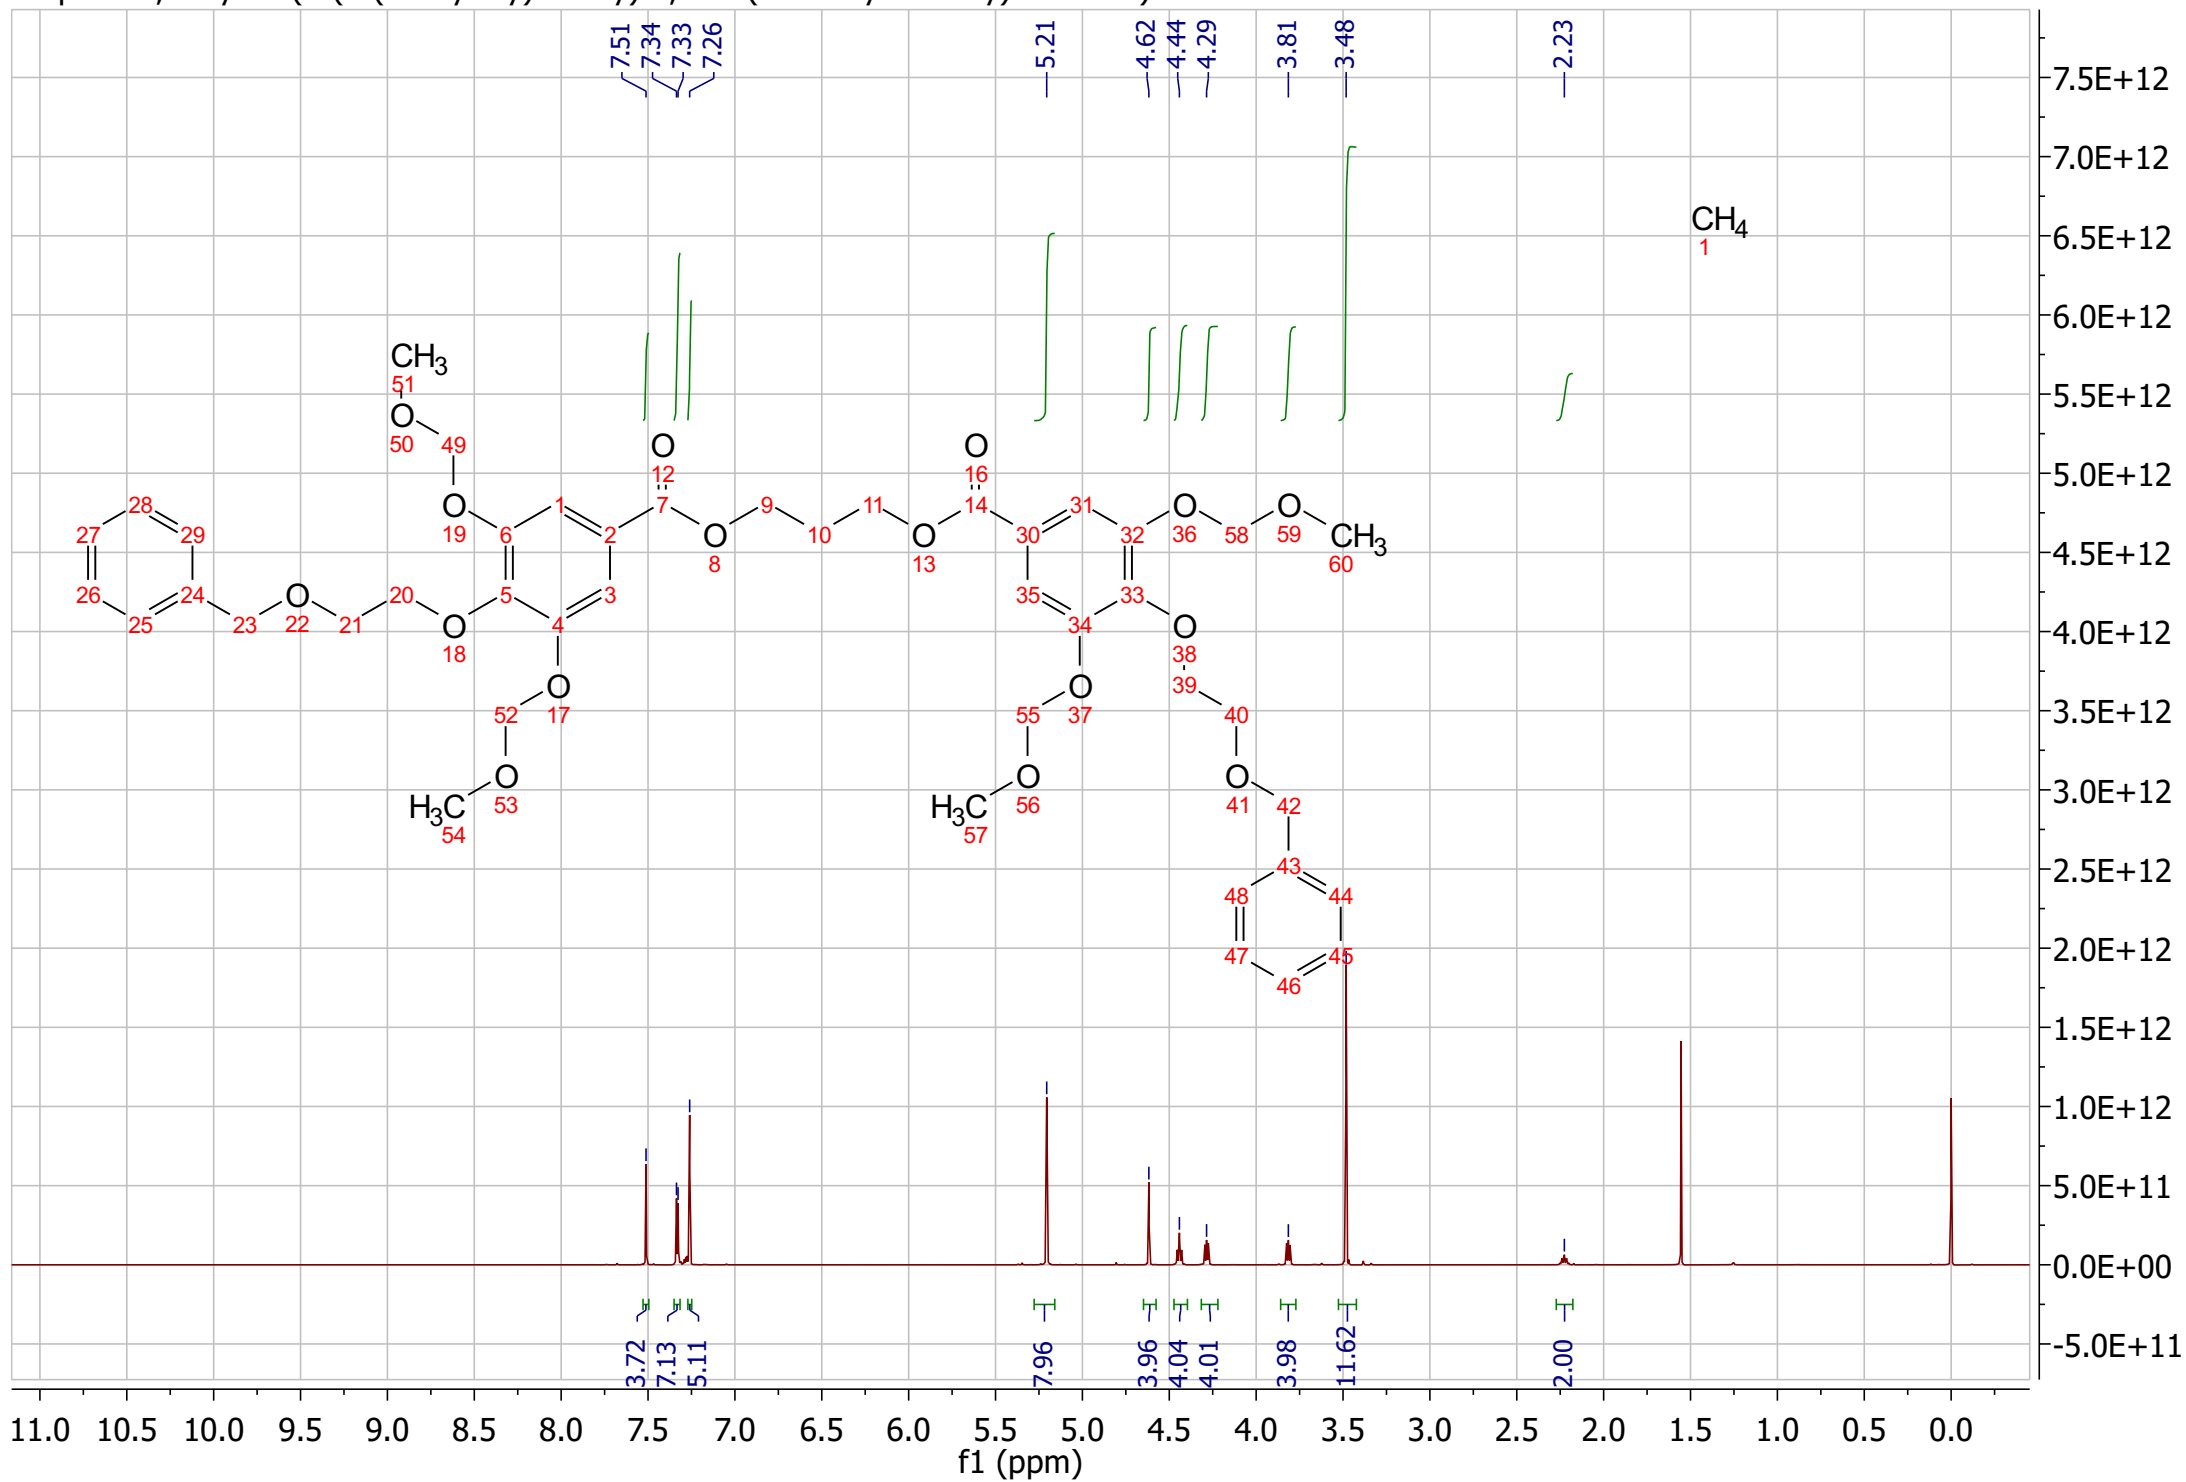

Propane-1,3-diyl bis(4-(2-(benzyloxy)ethoxy)-3,5-bis(methoxymethoxy)benzoate)

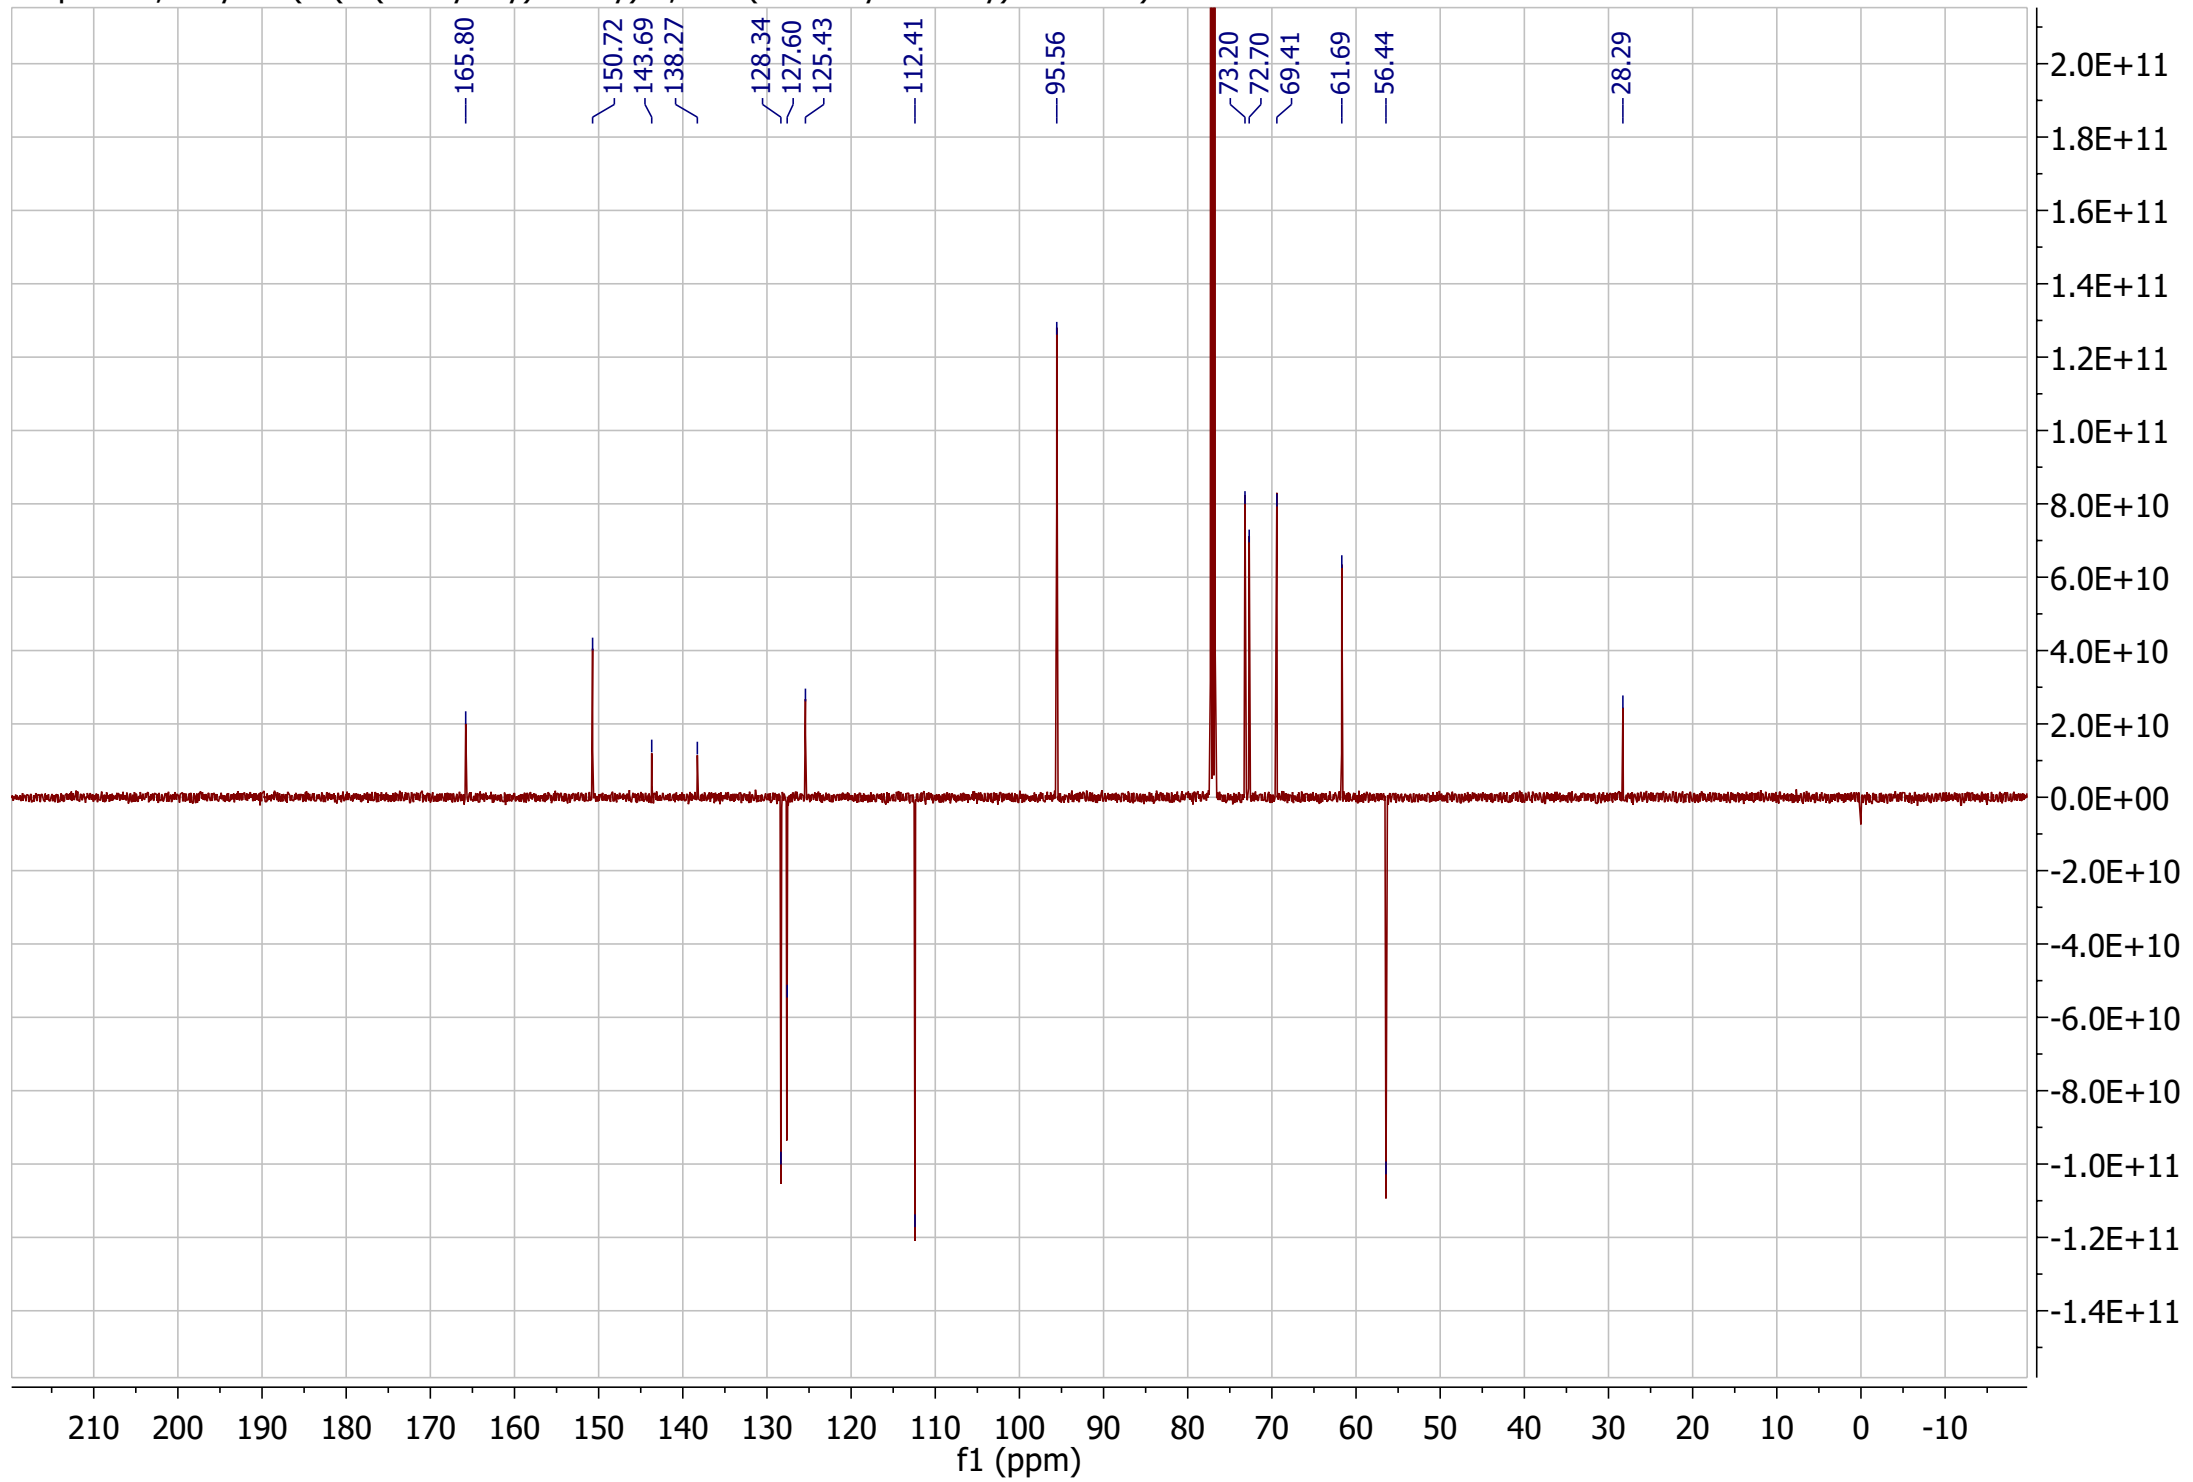

3-((4-(benzyloxy)-3,5-bis(methoxymethoxy)benzoyl)oxy)propyl-3,5-bis(methoxymethoxy)-4-(naphth-2-ylmethoxy)benzoate\_DMSO

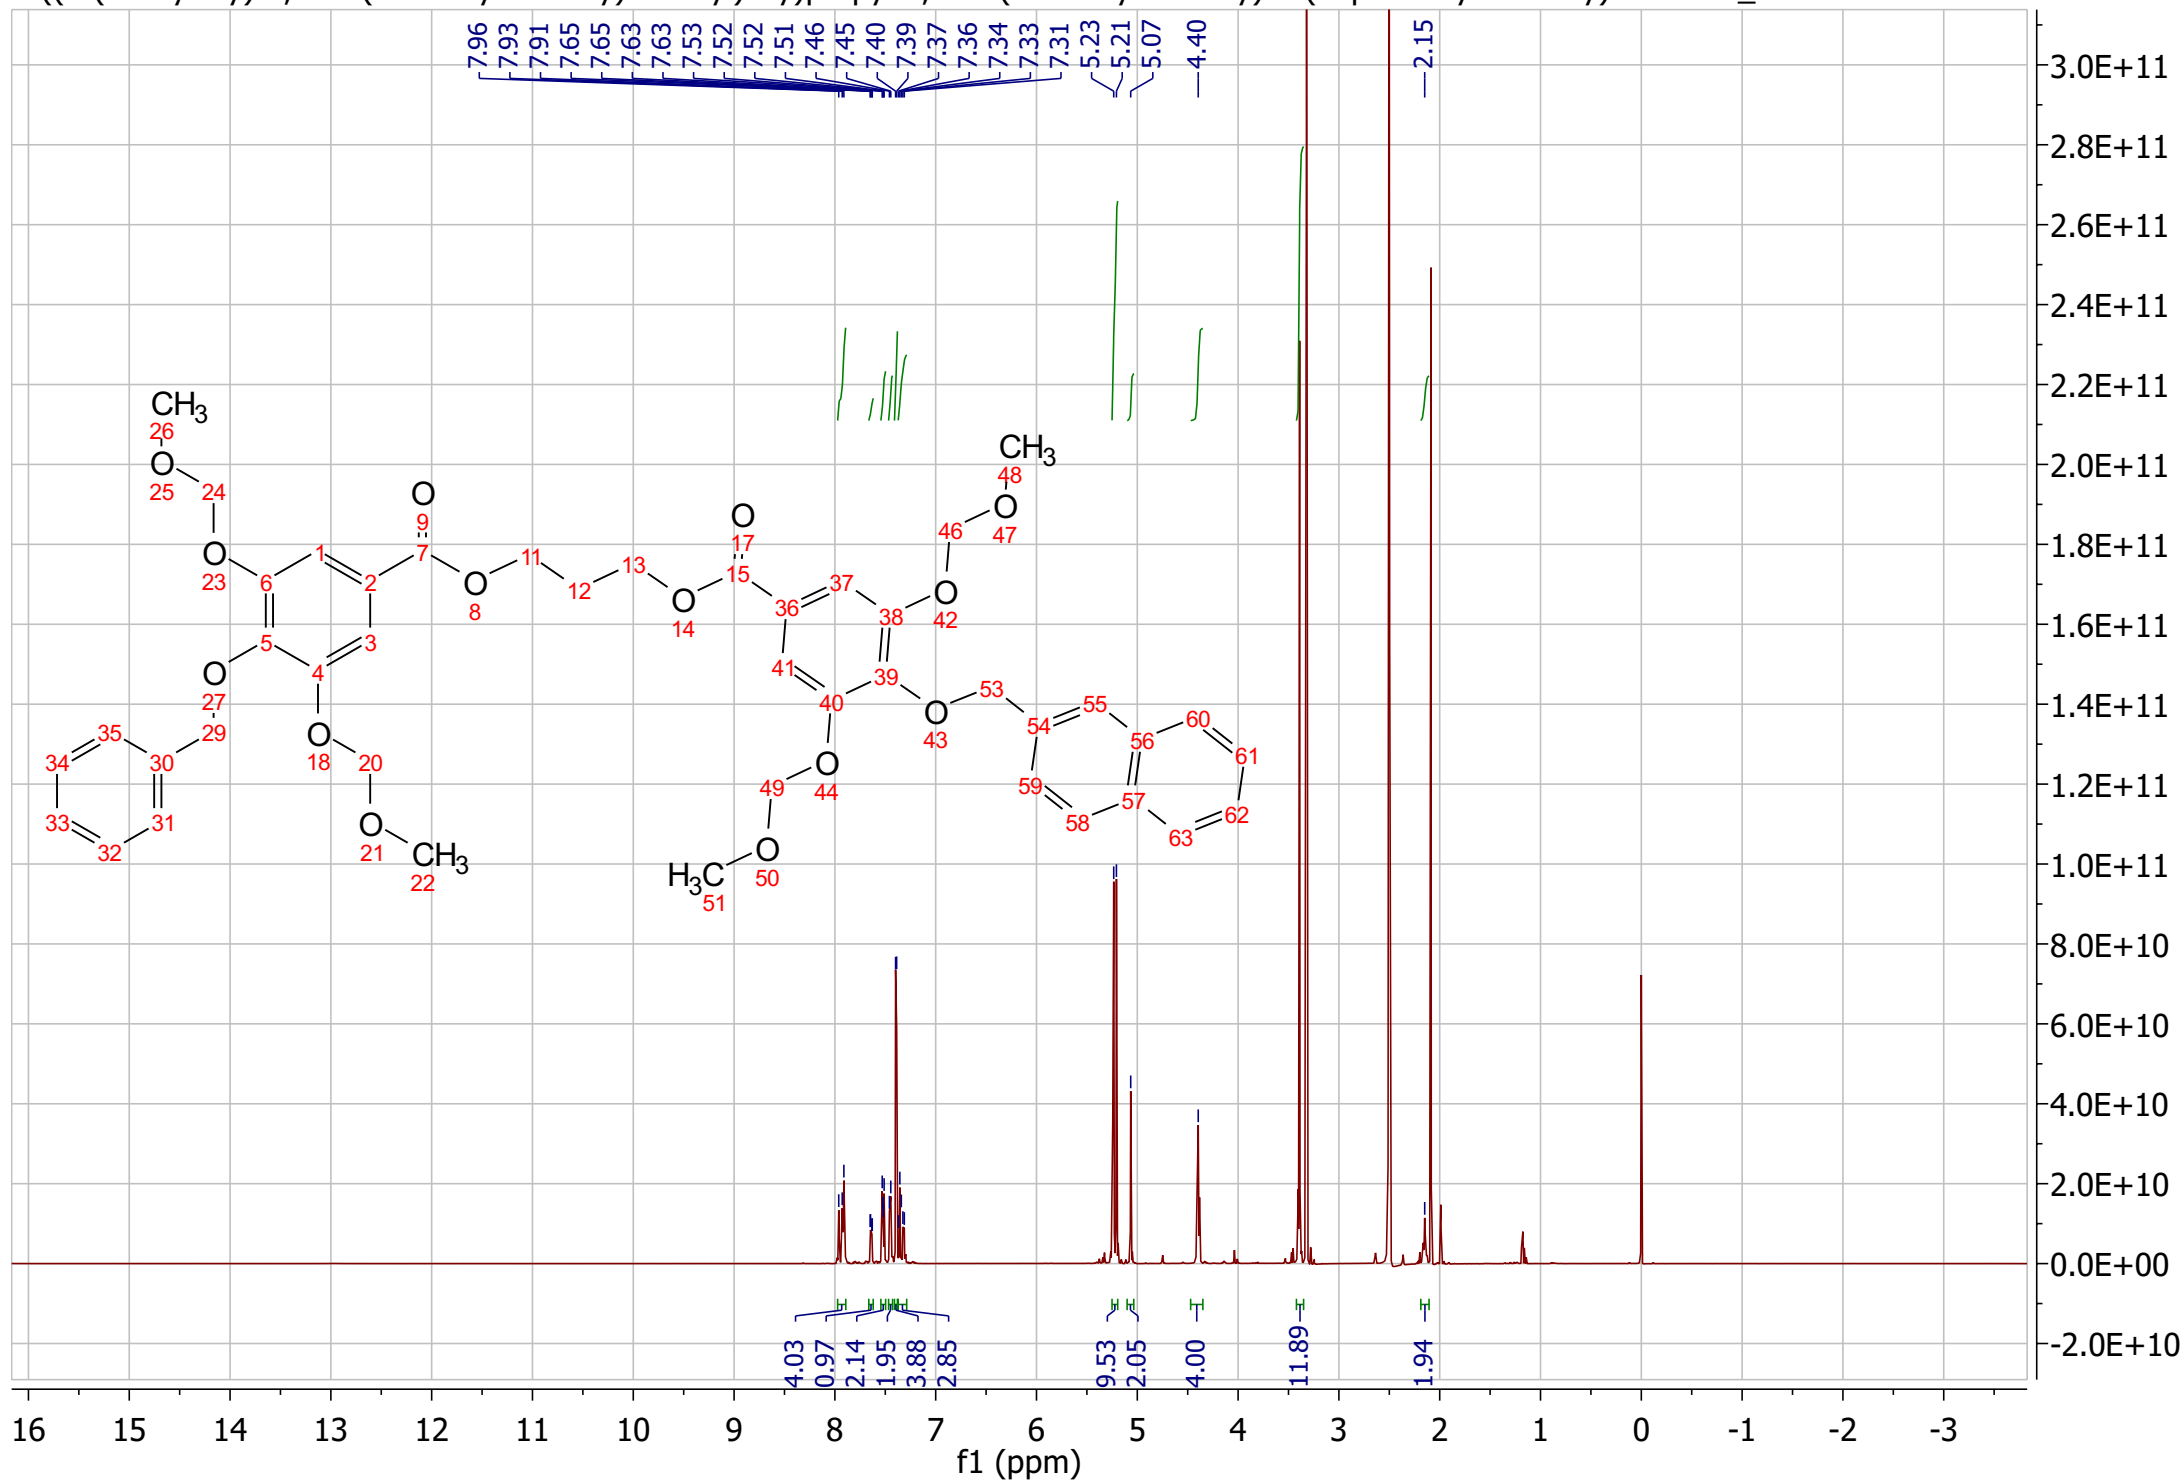

3-((4-(benzyloxy)-3,5-bis(methoxymethoxy)benzoyl)oxy)propyl-3,5-bis(methoxymethoxy)-4-(naphth-2-ylmethoxy)benzoate\_DMSO

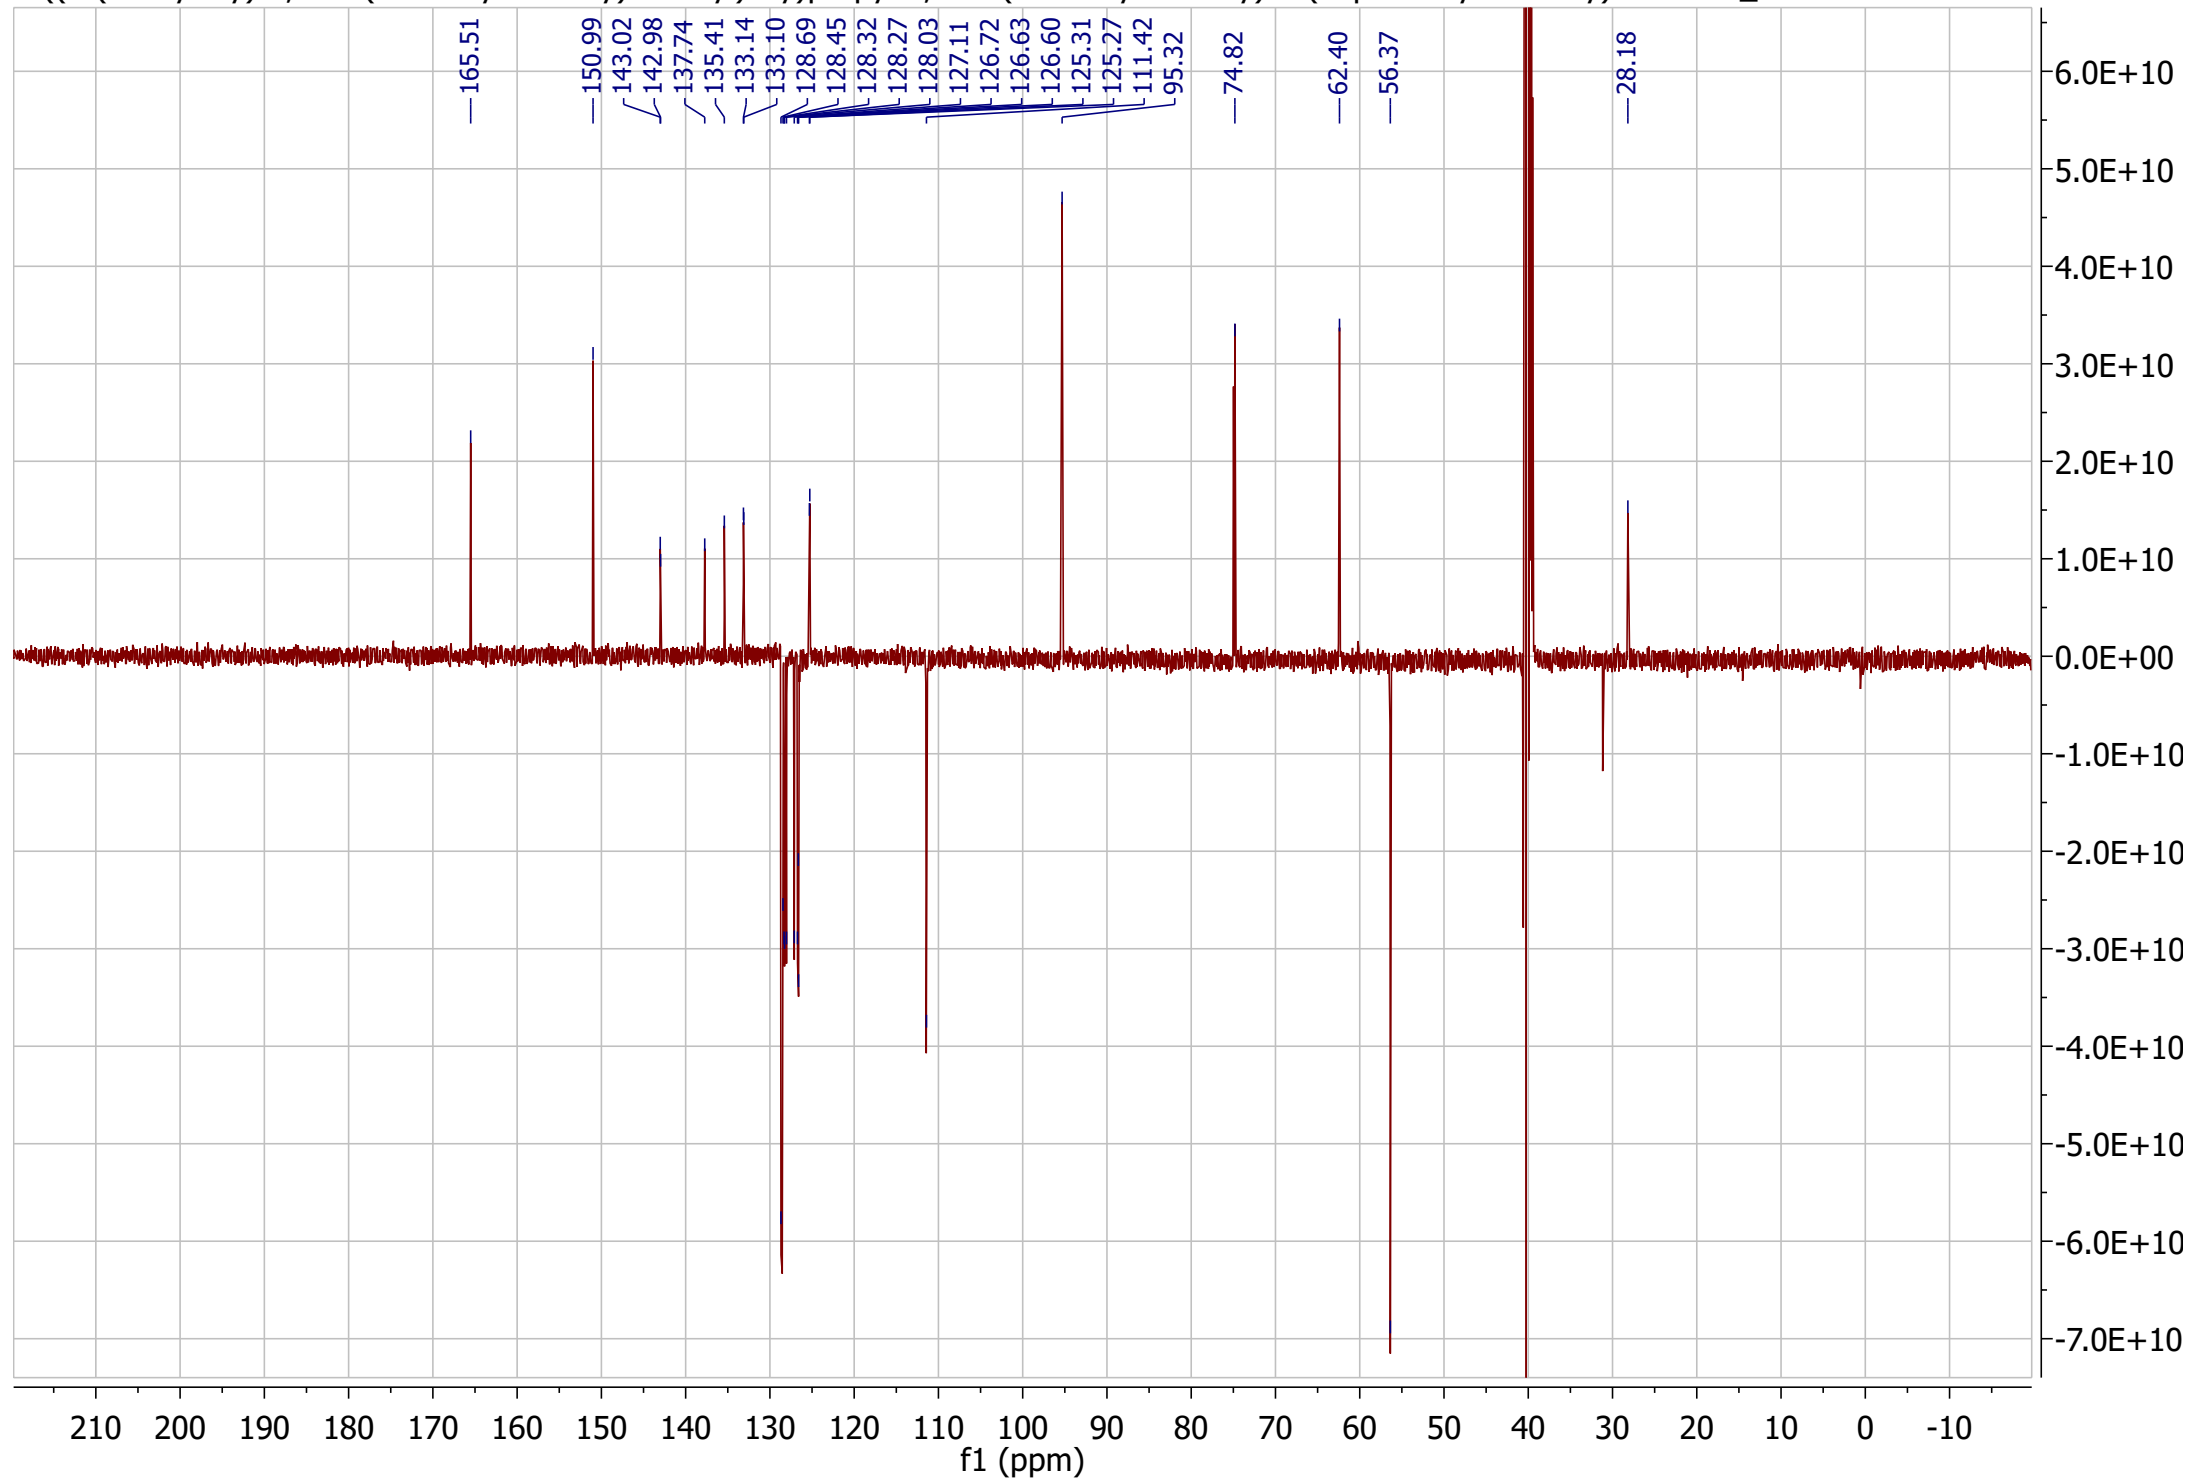

3-((4-(2-(benzyloxy)ethoxy)-3,5-bis(methoxymethoxy)benzoyl)oxy)propyl-3,4,5-tris(benzyloxy)benzoate\_CDCl3

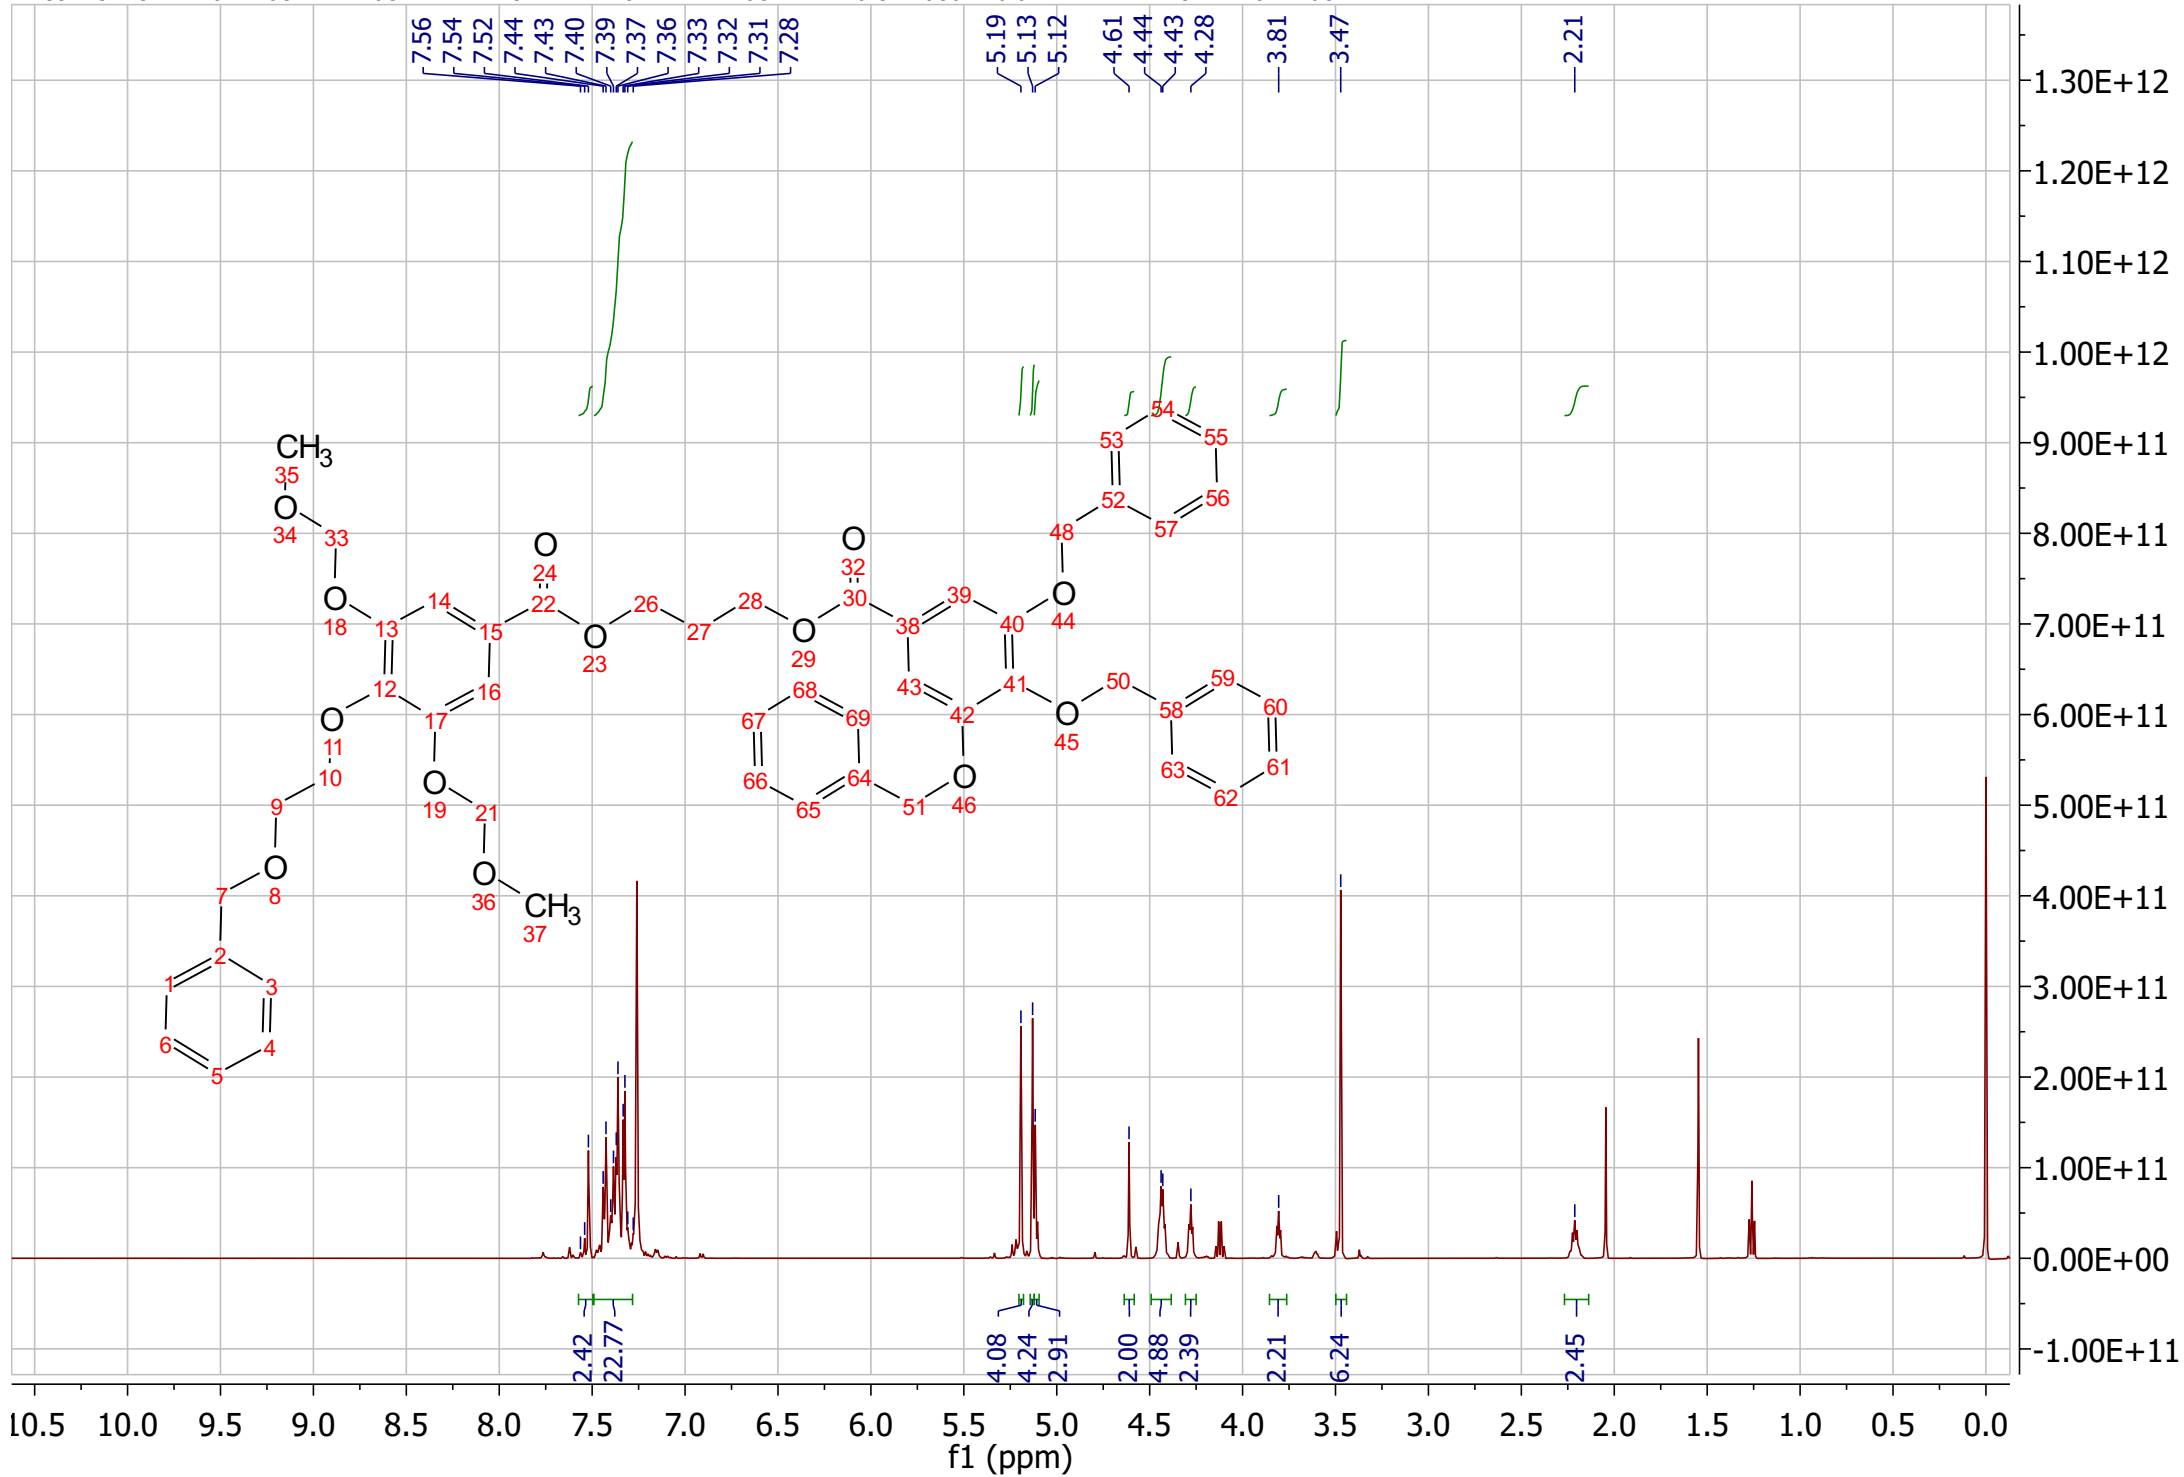



Propane-1,3-diyl bis(4-((4-methoxybenzyl)oxy)benzoate)\_DMSO

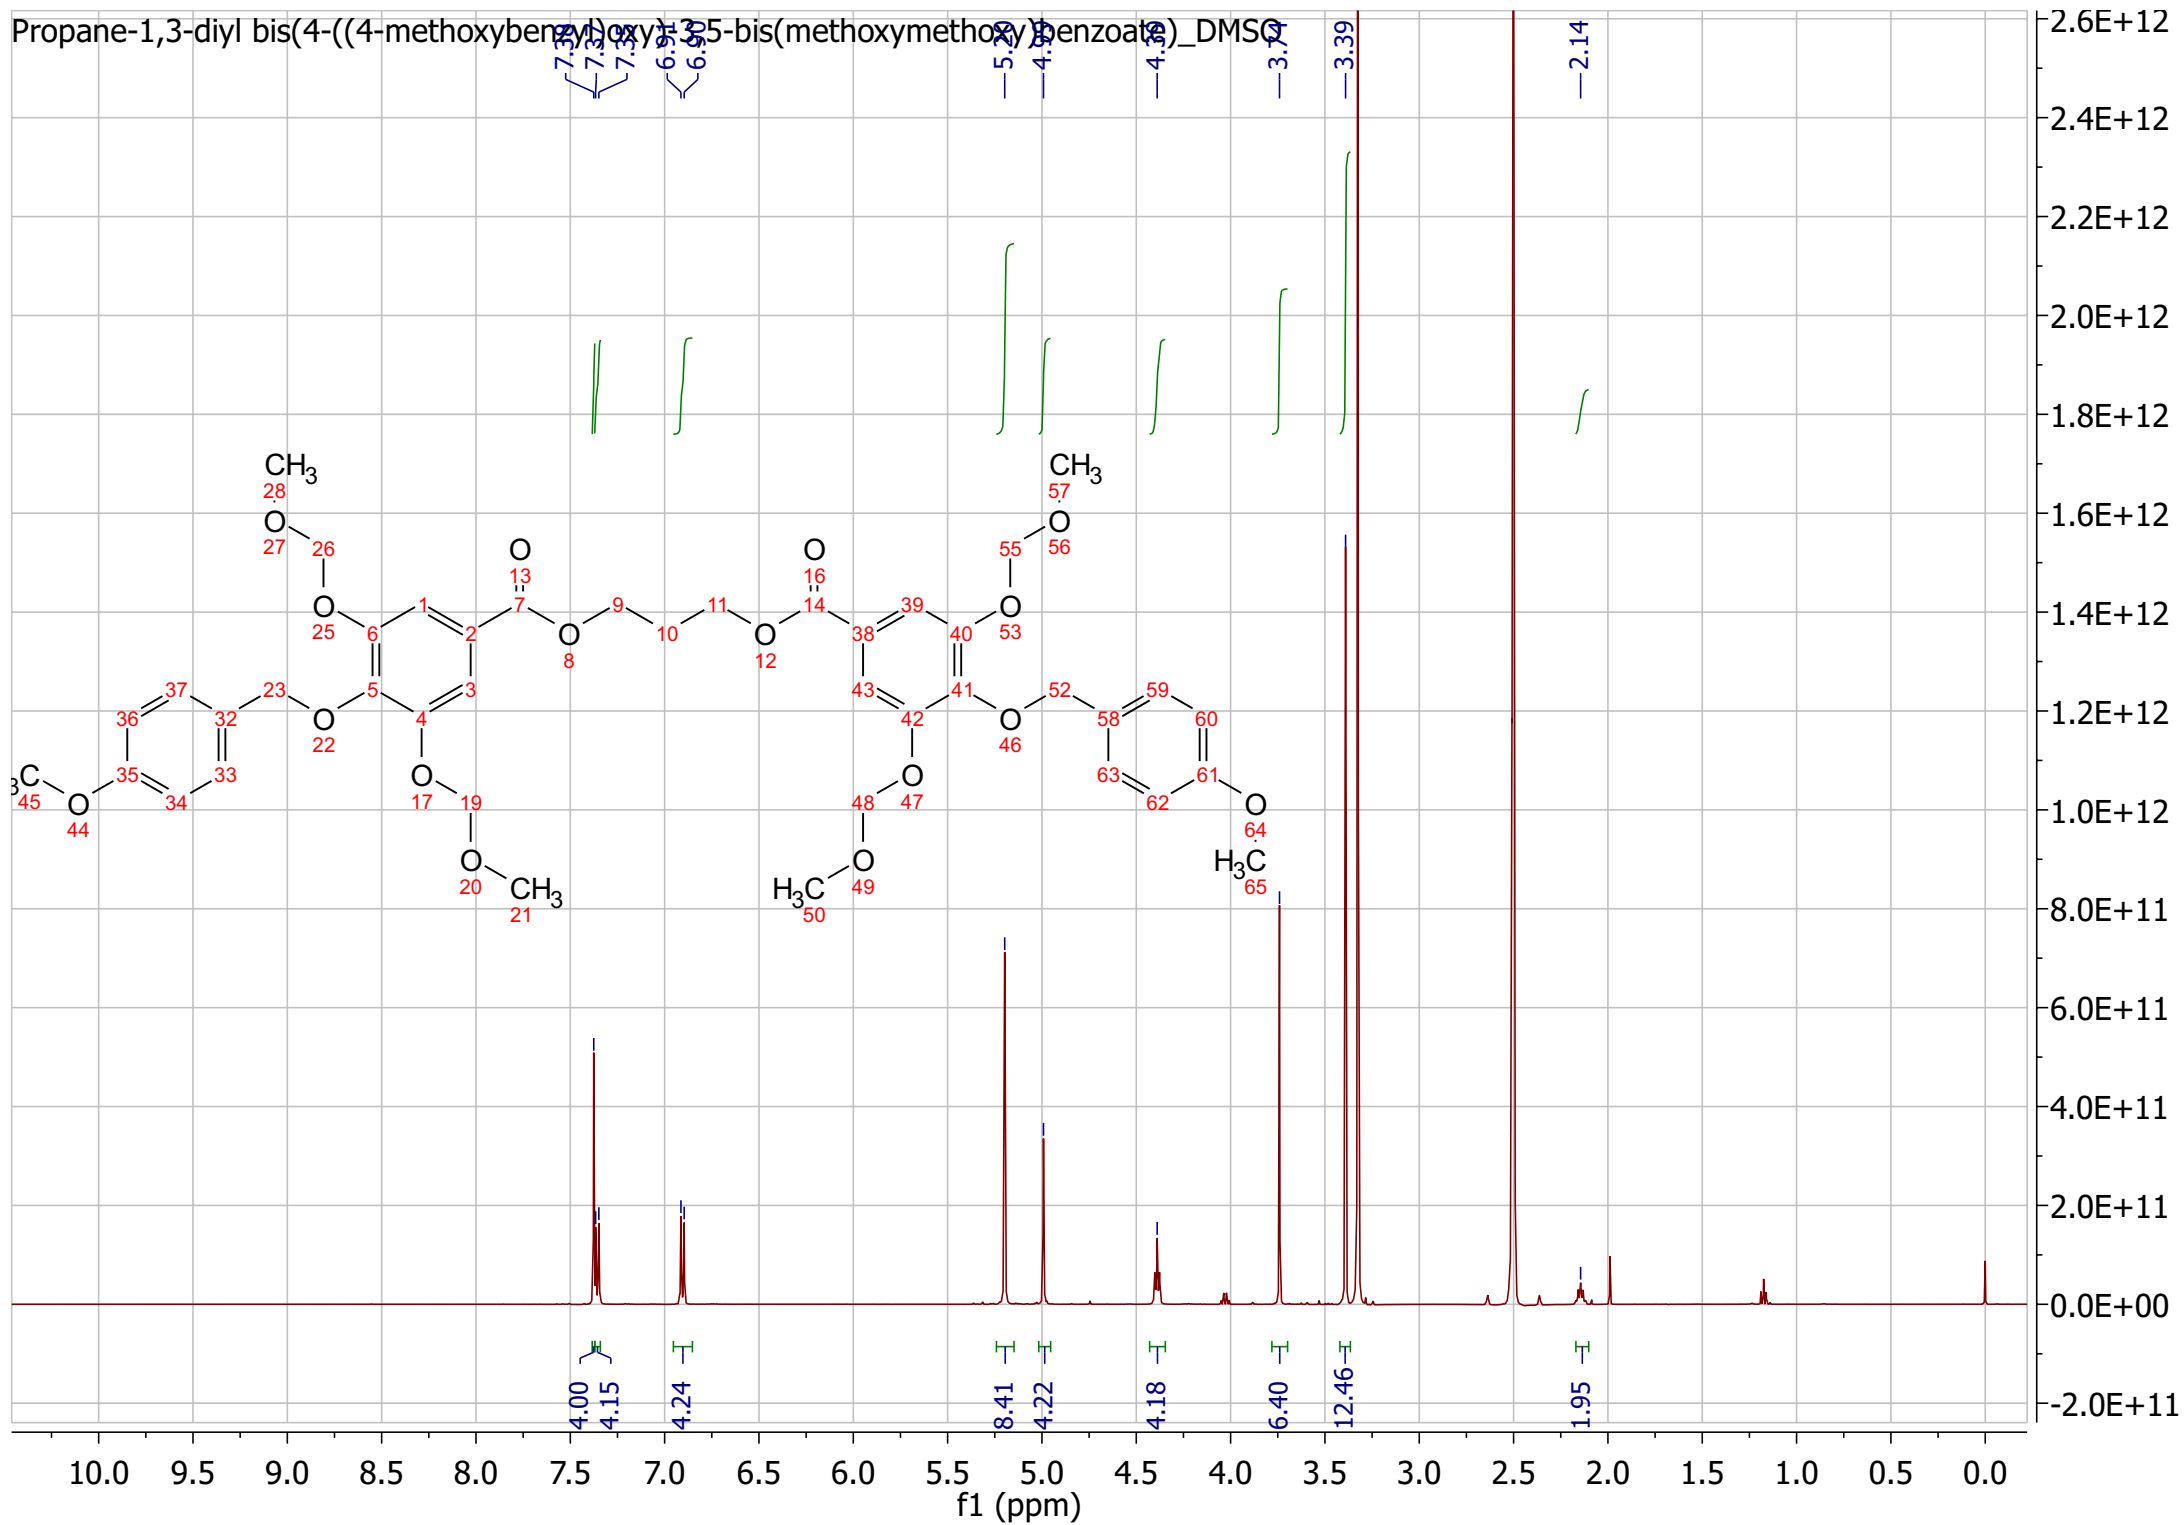

Propane-1,3-diyl bis(4-((4-methoxybenzoyloxy)-3,5-bis(methoxy)methoxy)benzoate)\_DMSO

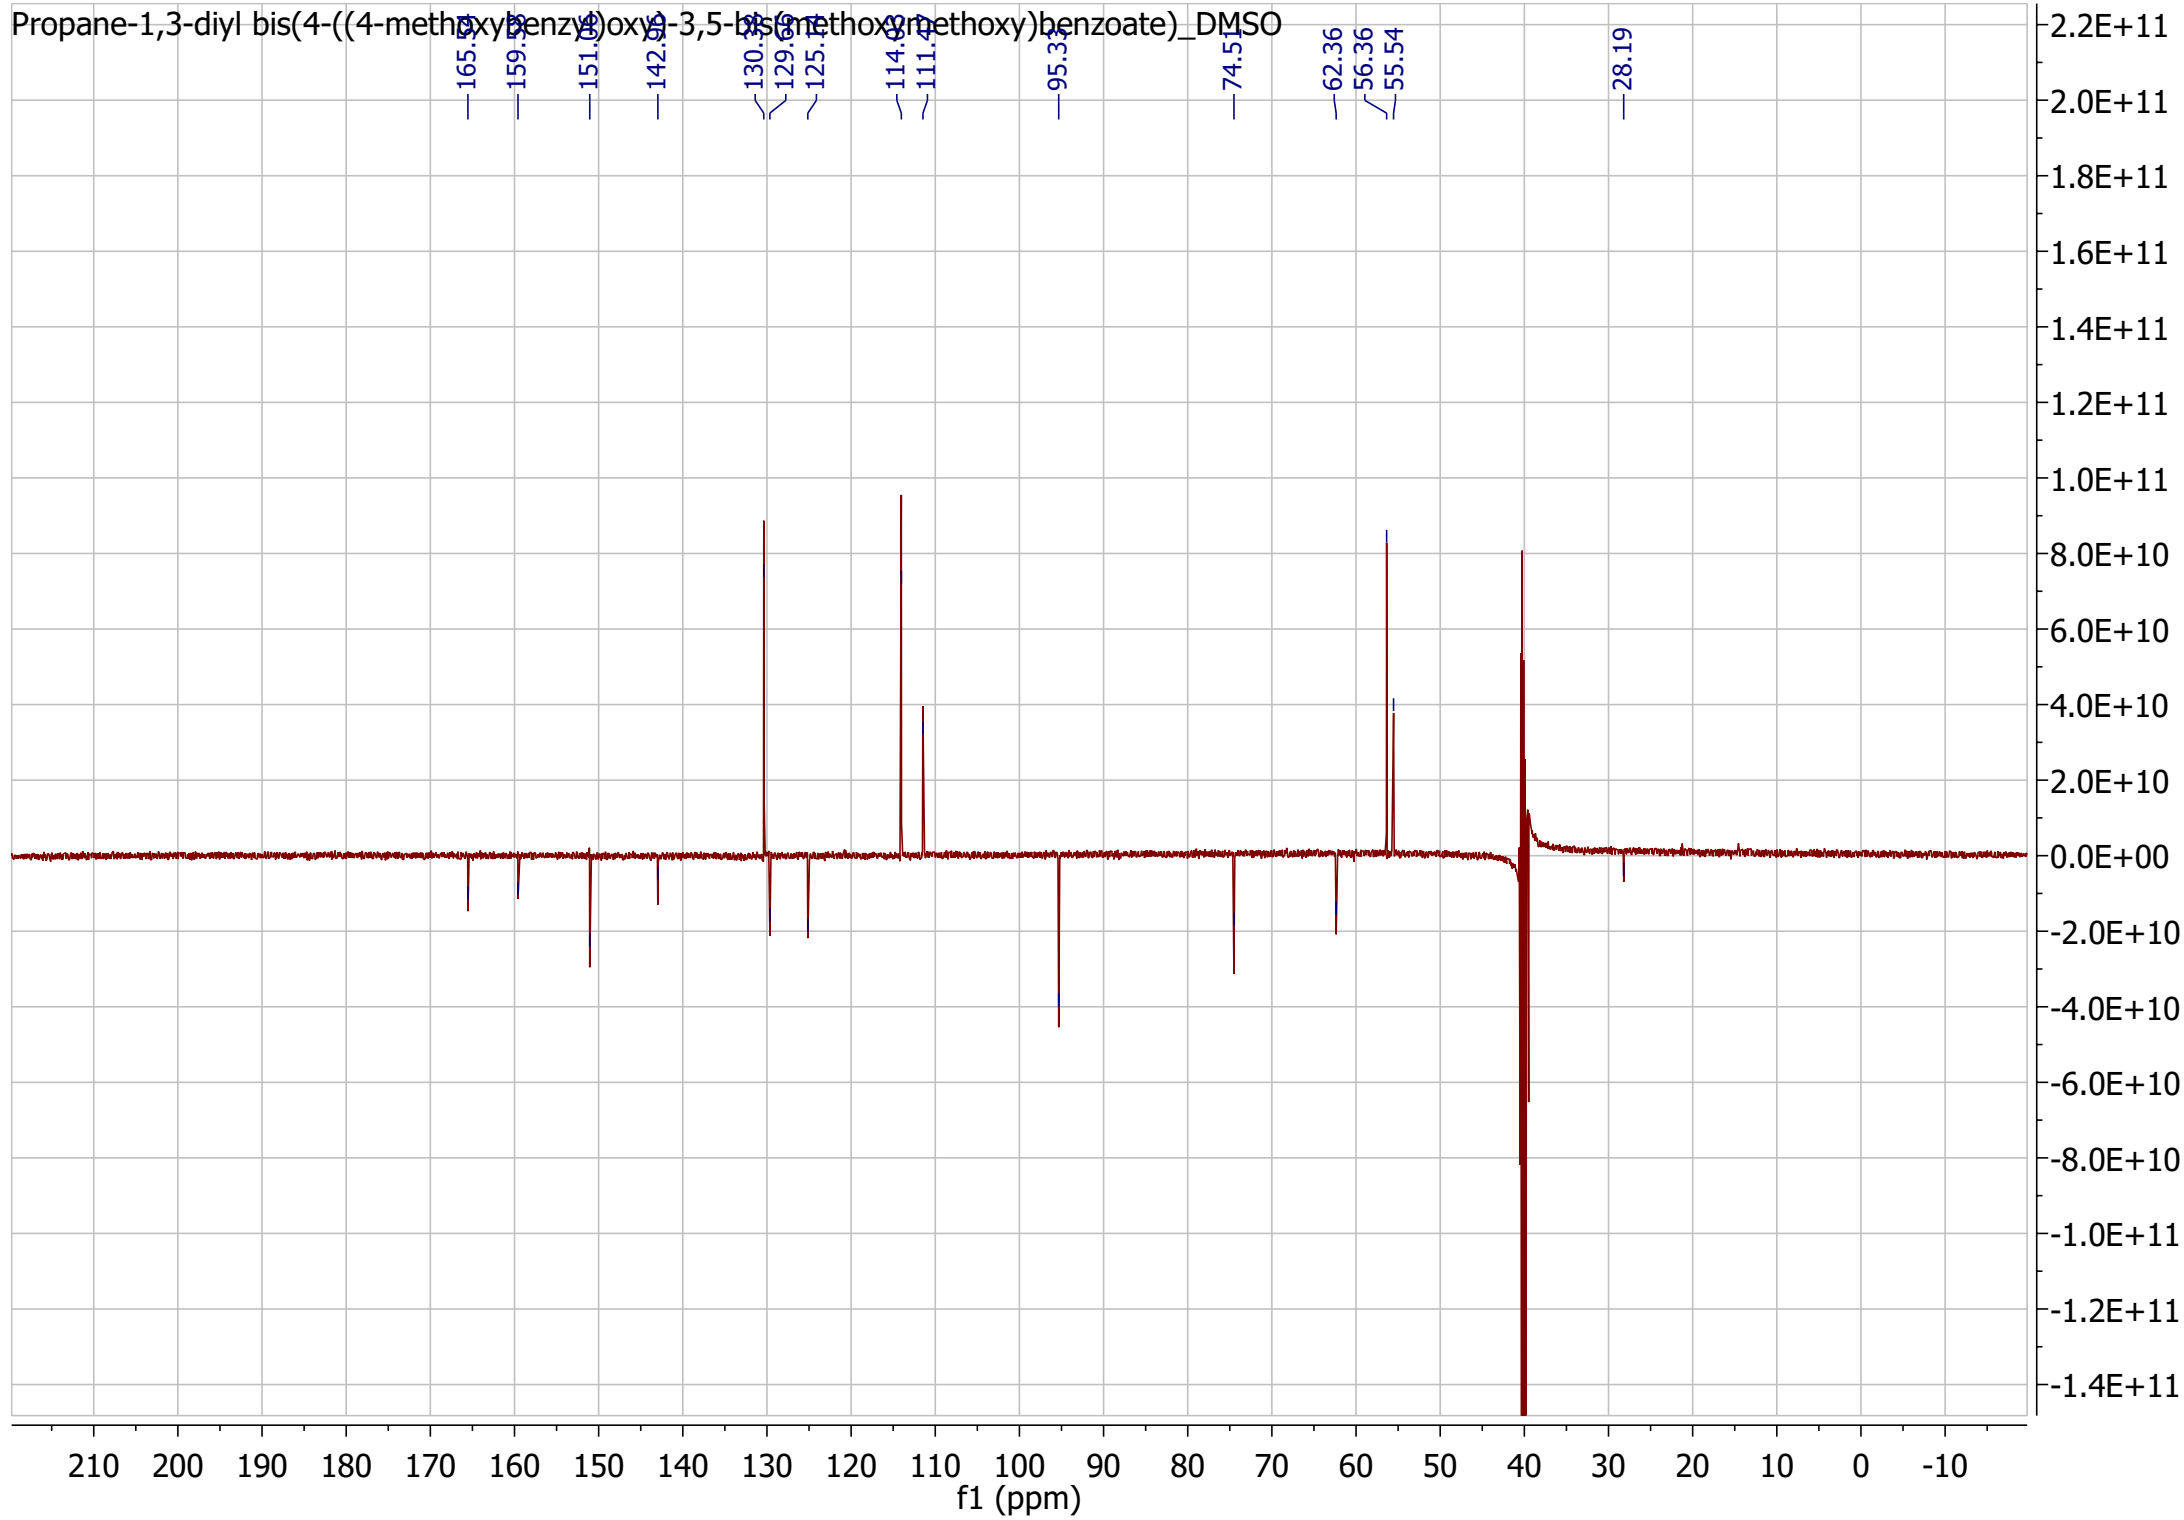

Propane-1,3-diyl bis(4-(benzyloxy)-3,5-dihydroxybenzoate)\_DMSO

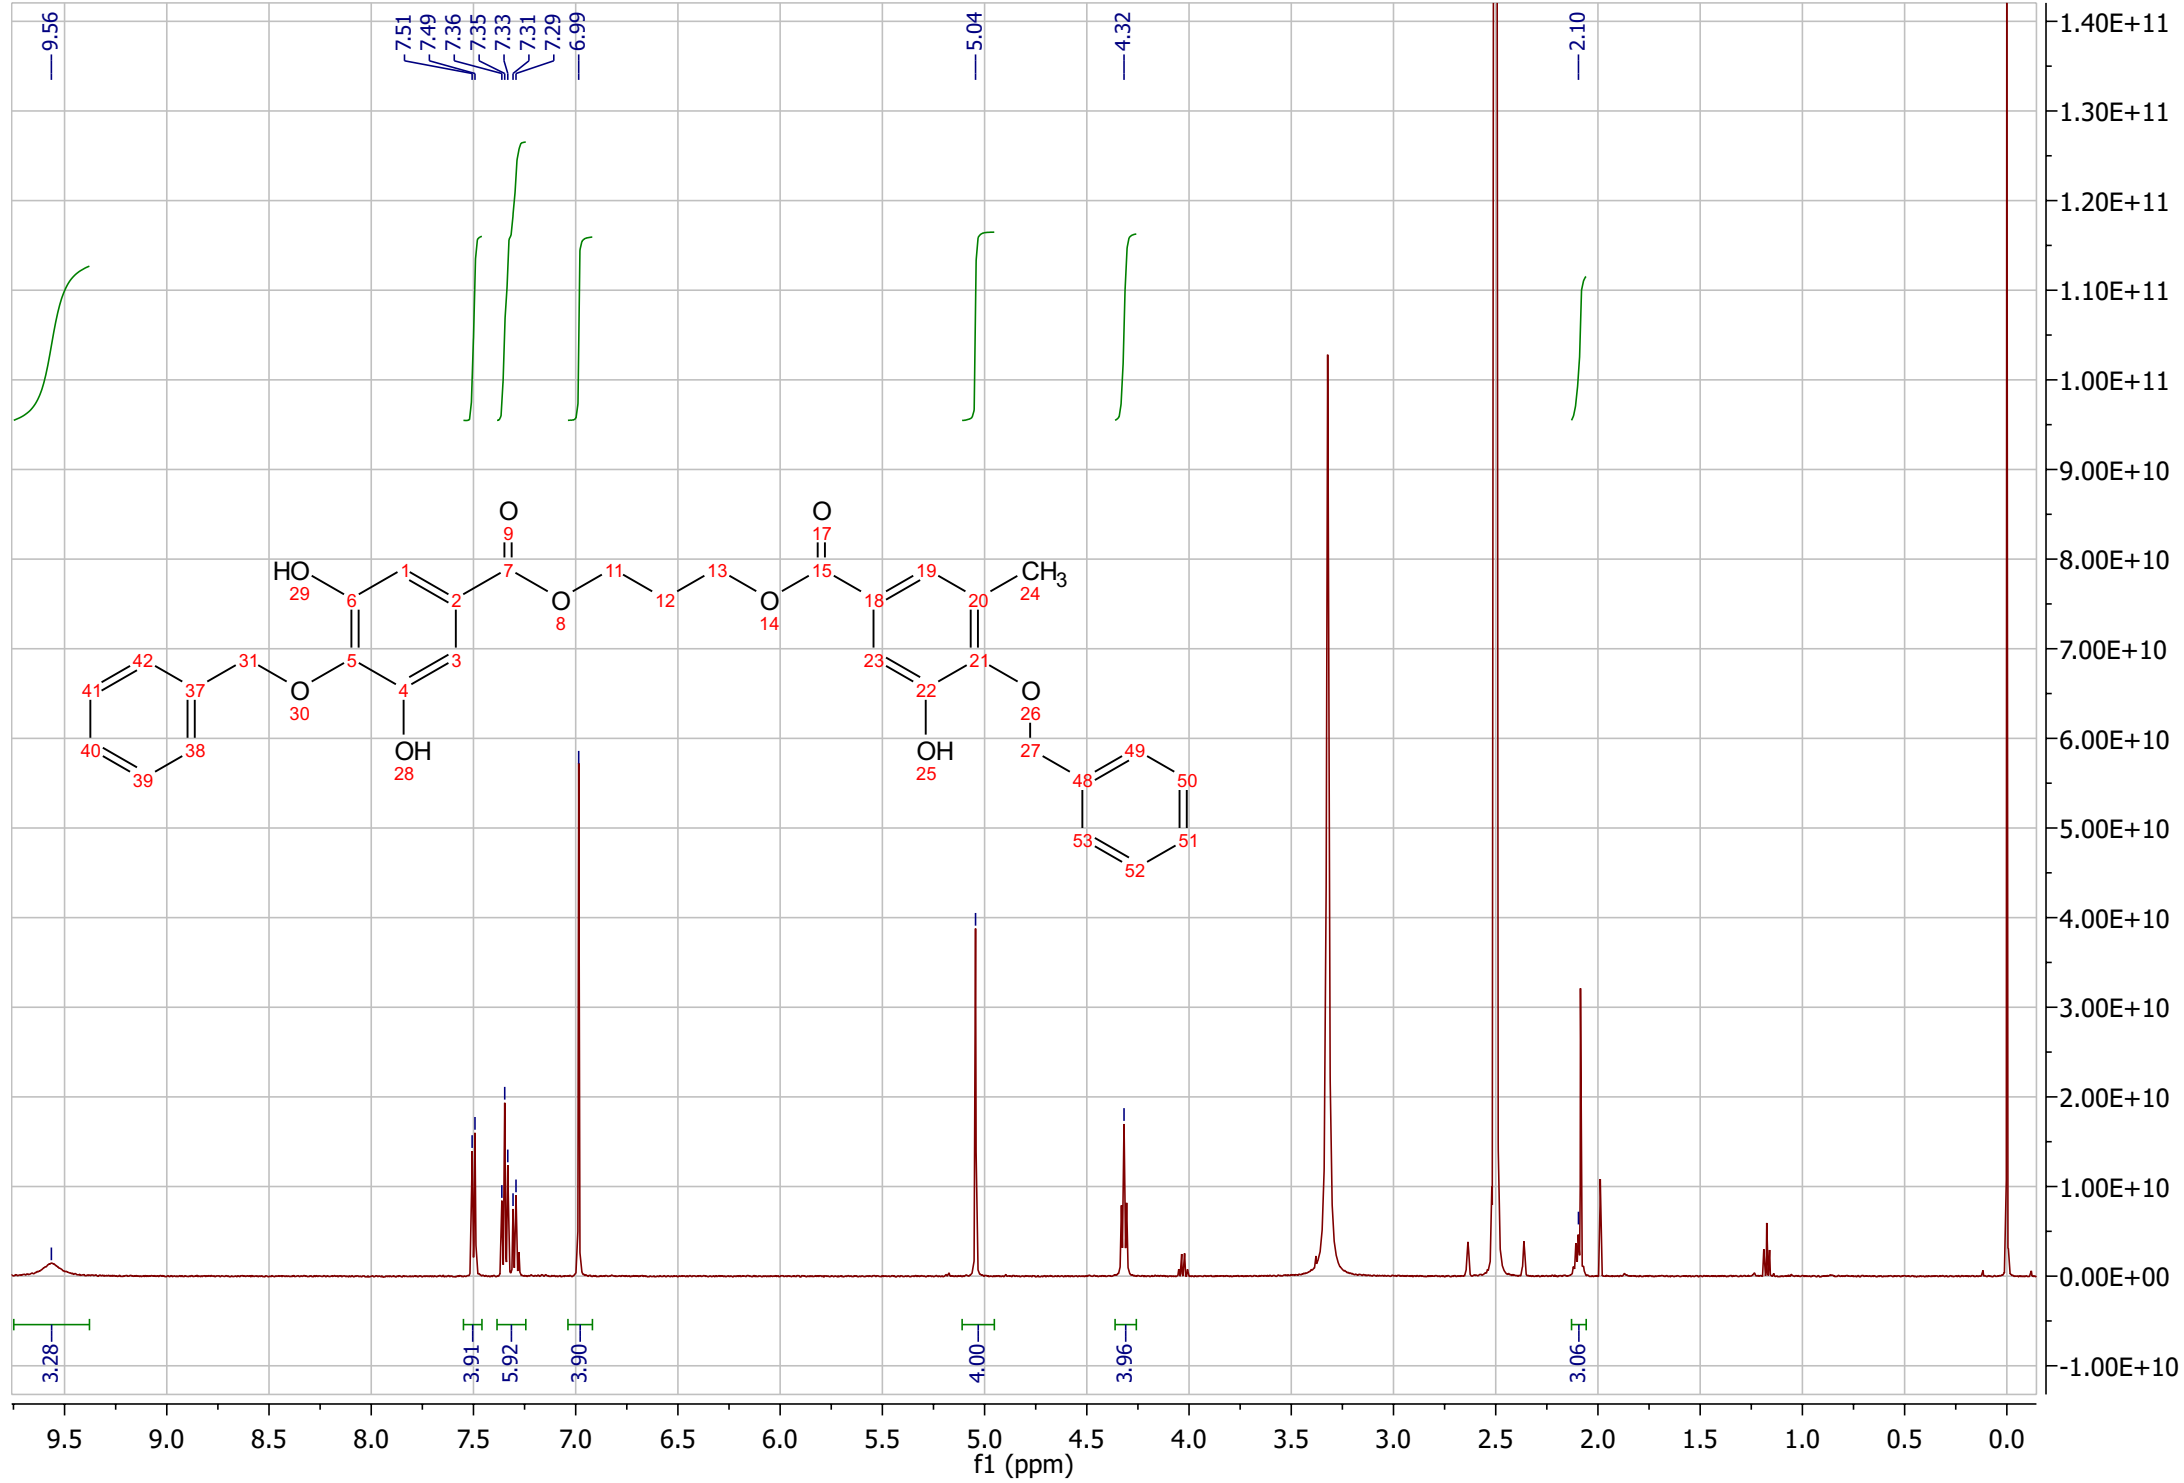

Propane-1,3-diyl bis(3,5-dihydroxy-4-(naphth-2-ylmethoxy)benzoate)\_DMSO

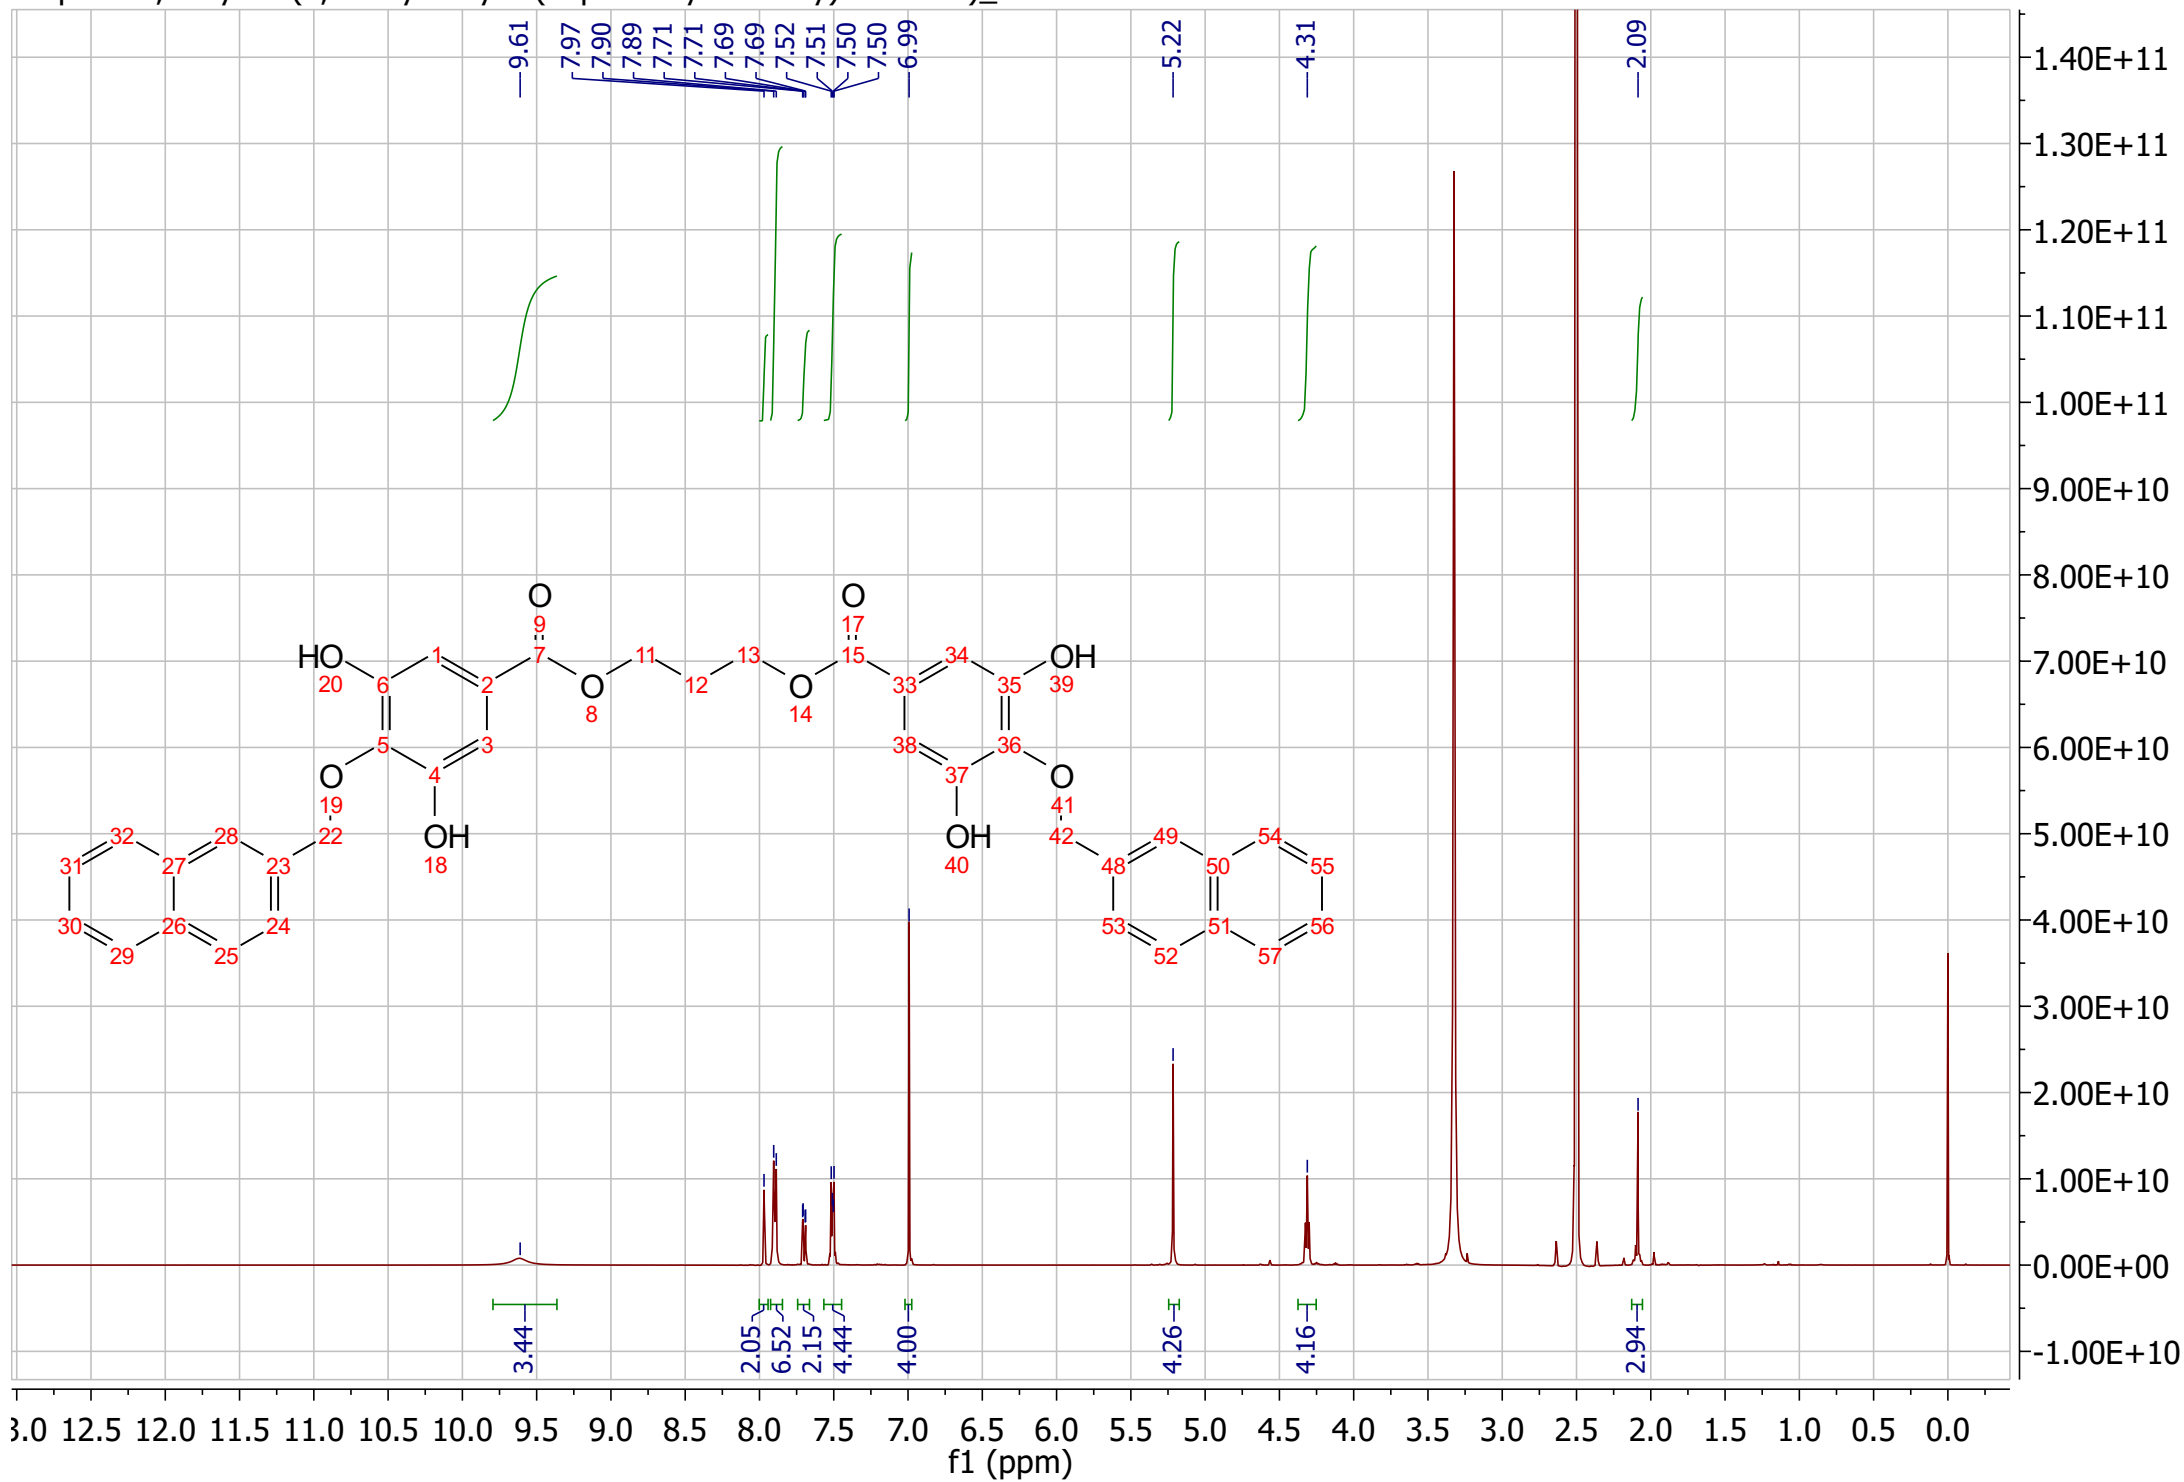

Propane-1,3-diyl bis(3,5-dihydroxy-4-(naphth-2-ylmethoxy)benzoate)\_DMSO

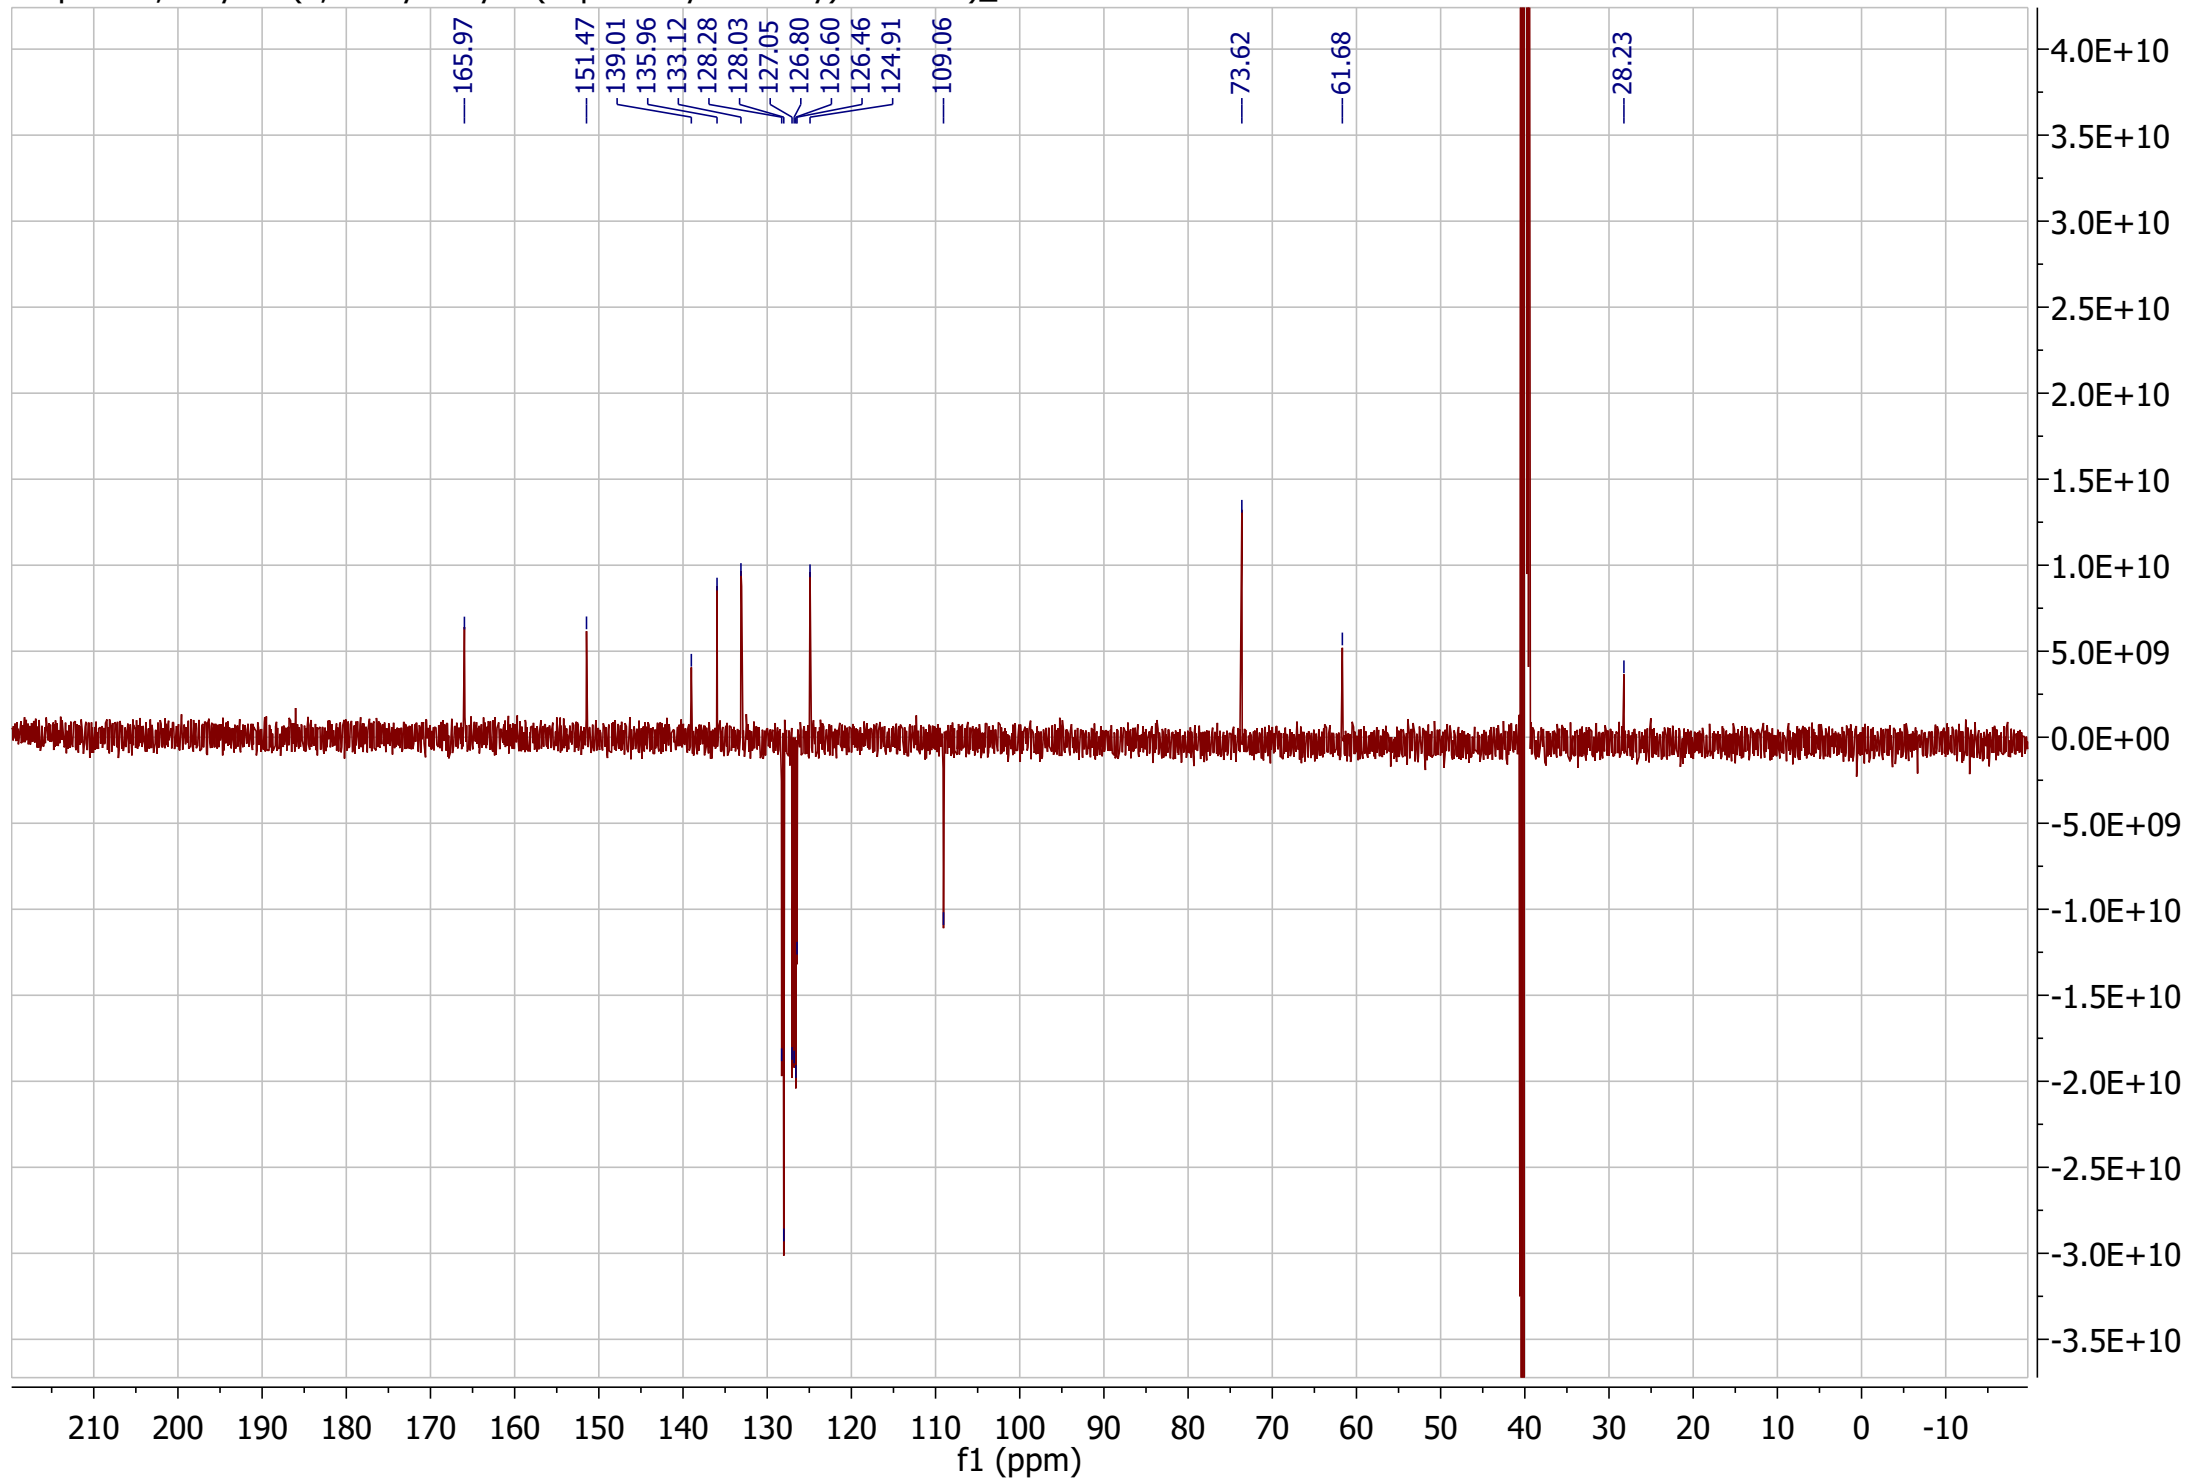

Propane-1,3-diyl bis(4-(2-(benzyloxy)ethoxy)-3,5-dihydroxybenzoate)

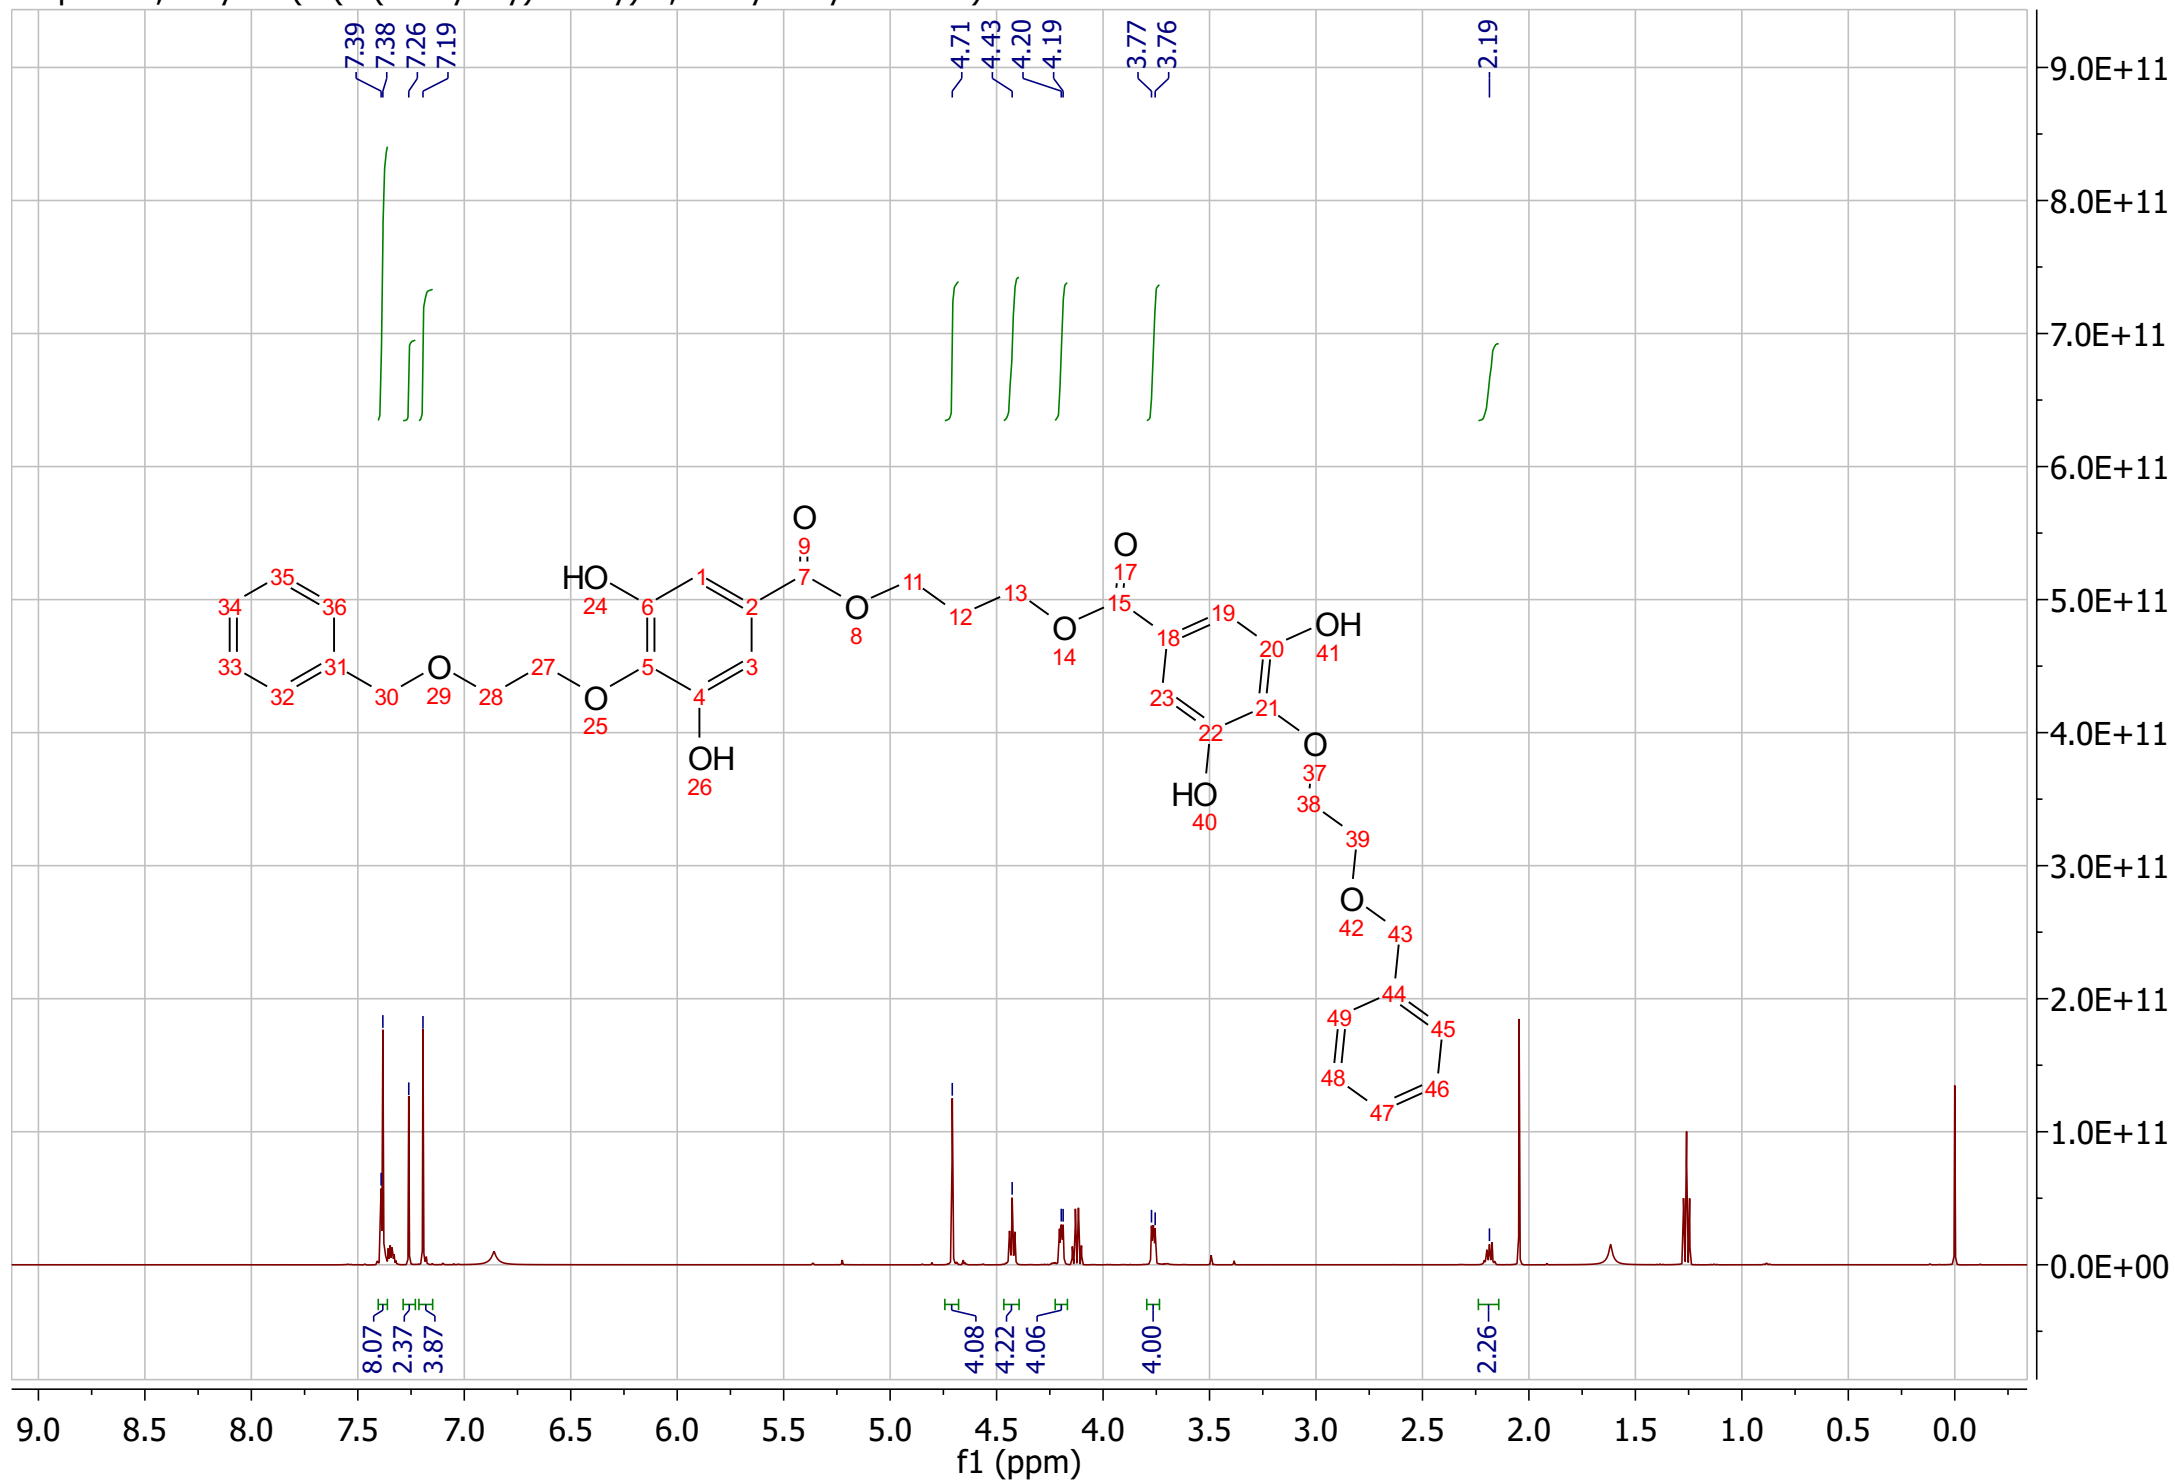

Propane-1,3-diyl bis(4-(2-(benzyloxy)ethoxy)-3,5-dihydroxybenzoate)

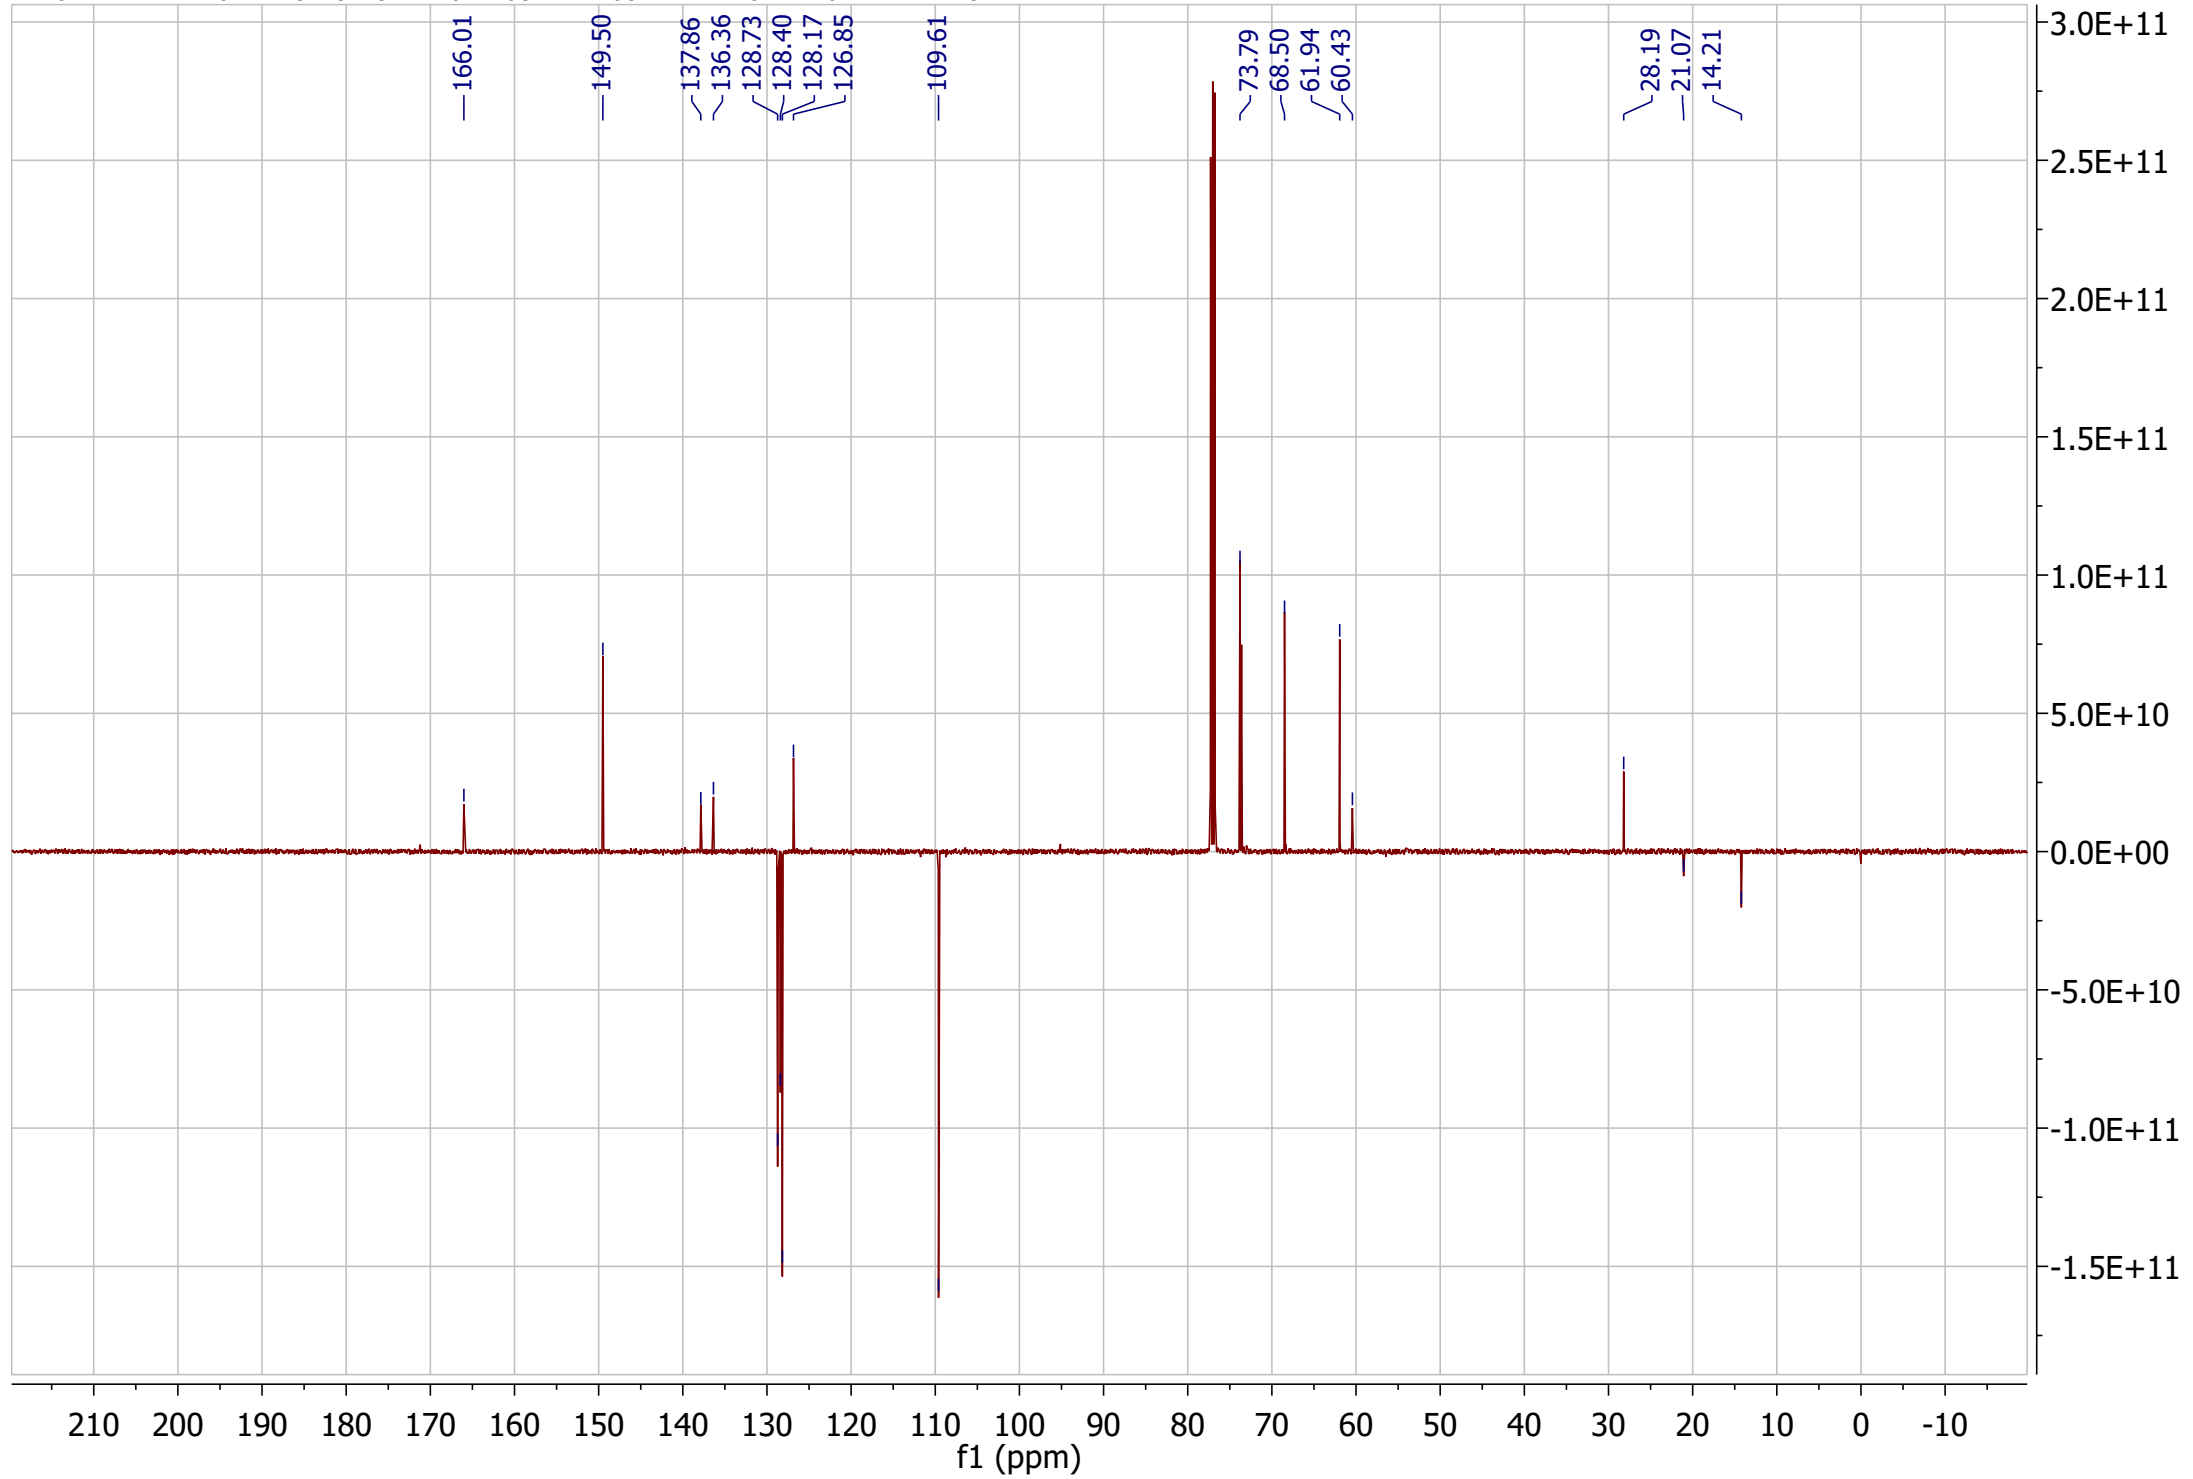

3-((4-(benzyloxy)-3,5-dihydroxybenzoyl)oxy)propyl-3,5-dihydroxy-4-(naphthalen-1-ylmethoxy)benzoate\_CDCl3

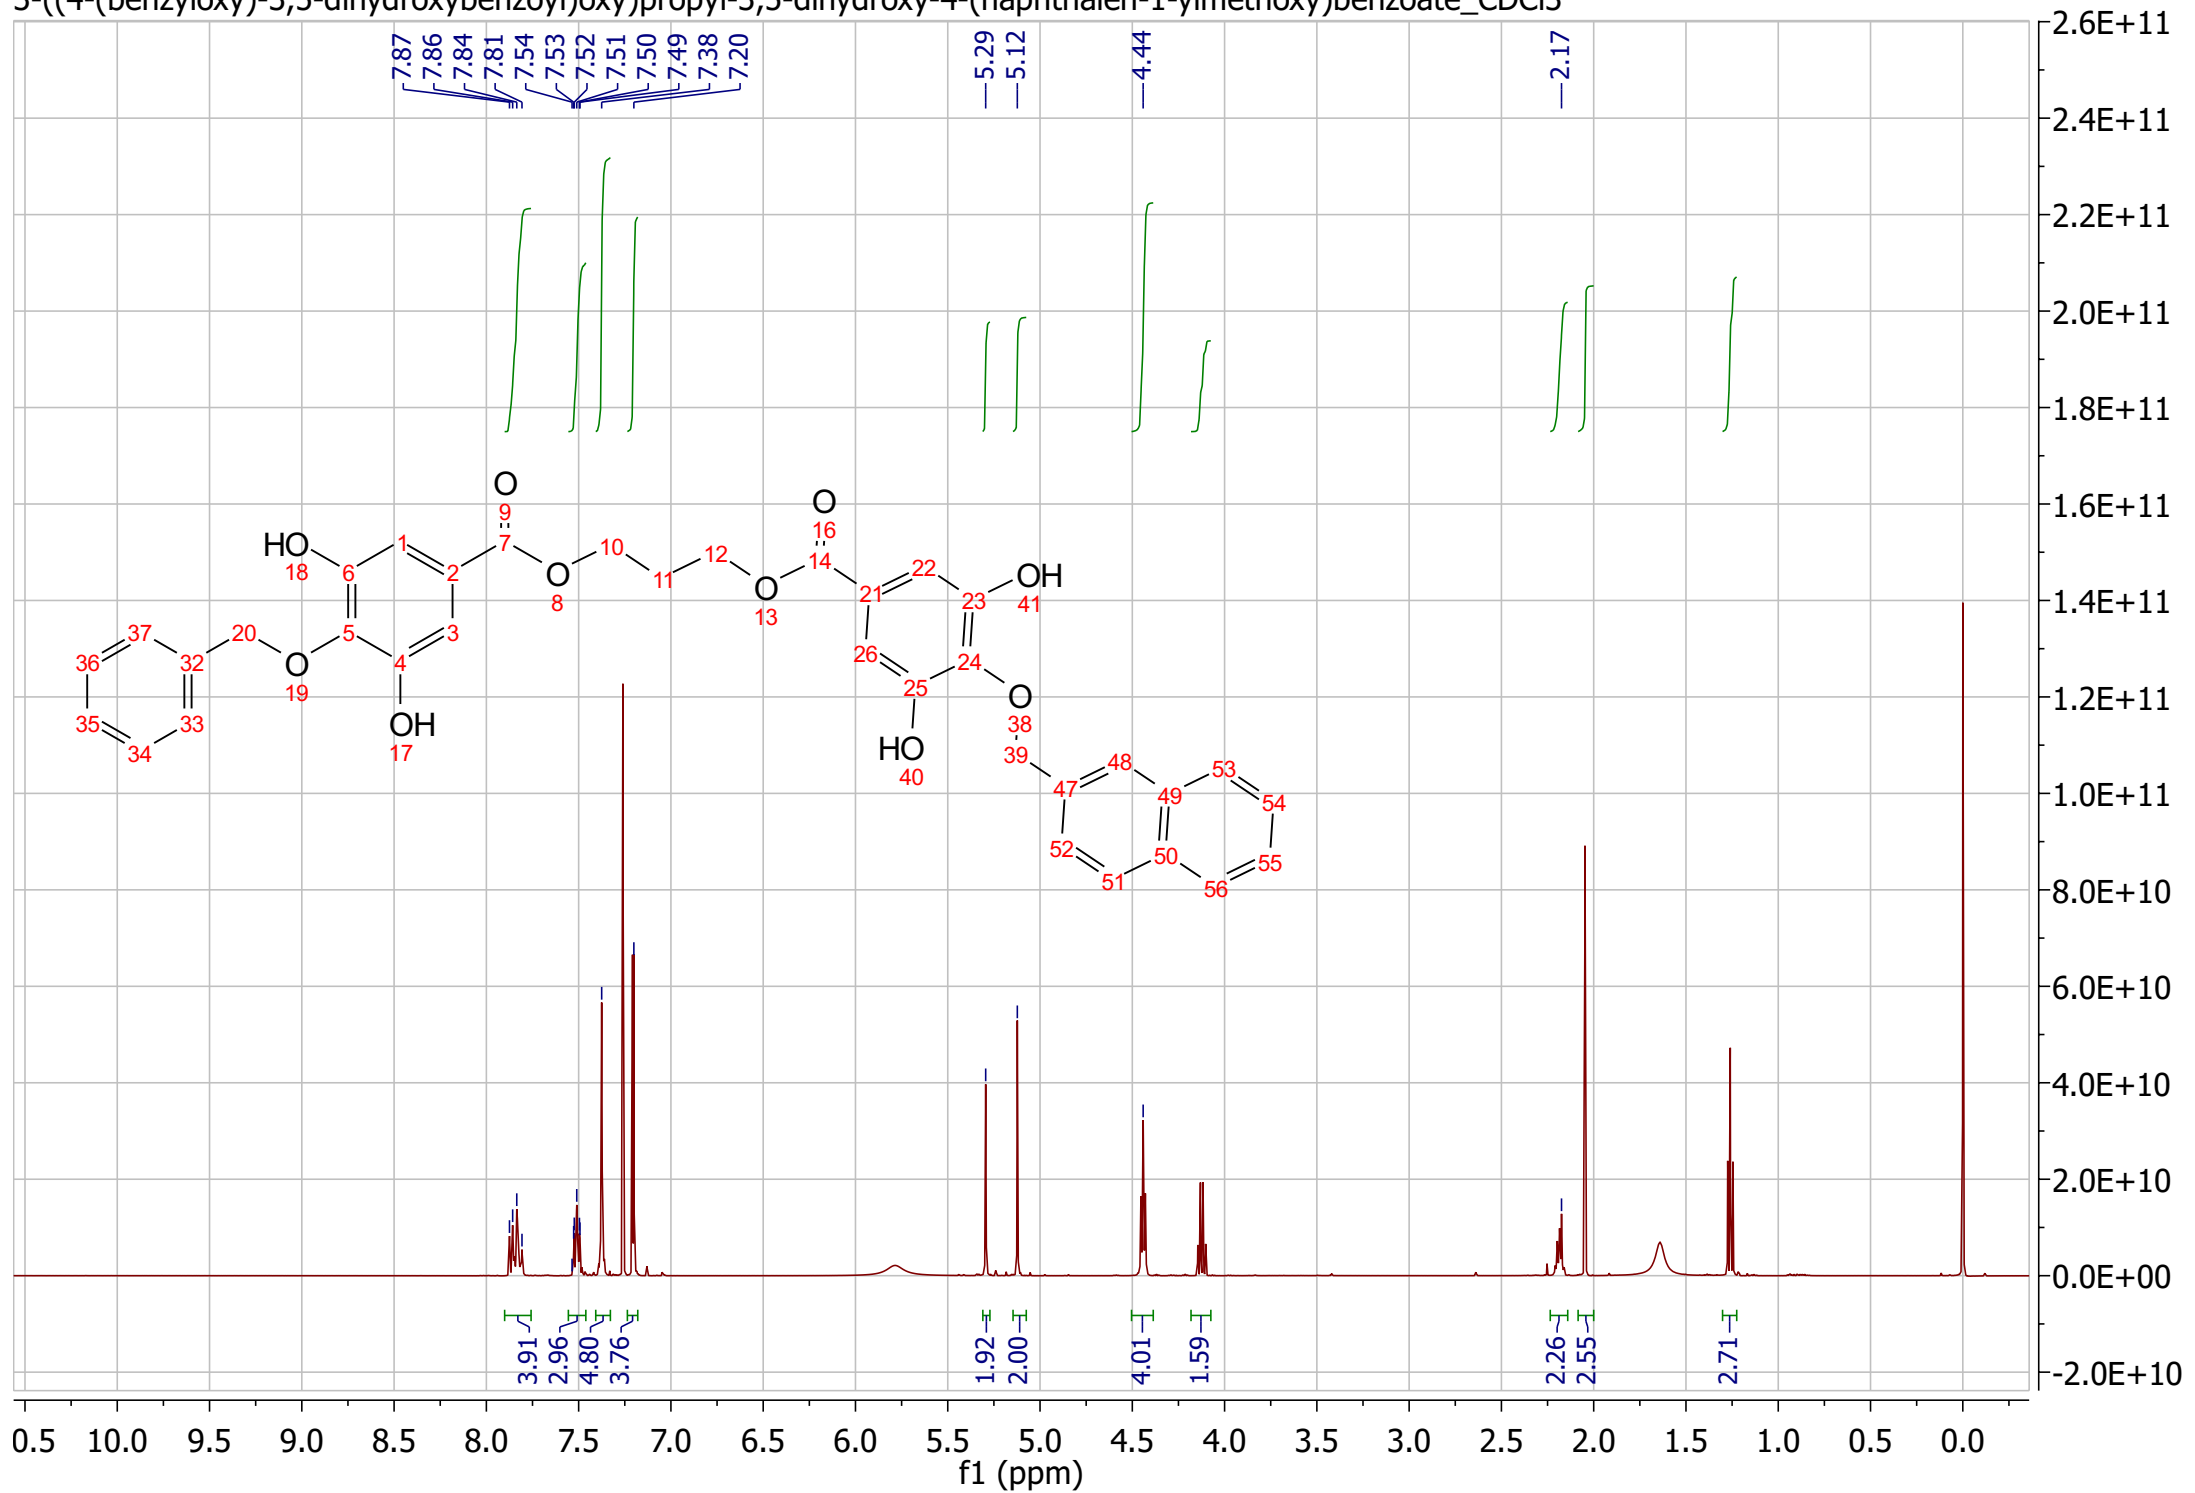



3-((4-(benzyloxy)-3,5-dihydroxybenzoyl)oxy)propyl-3,5-dihydroxy-4-(naphthalen-1-ylmethoxy)benzoate\_CDCl3

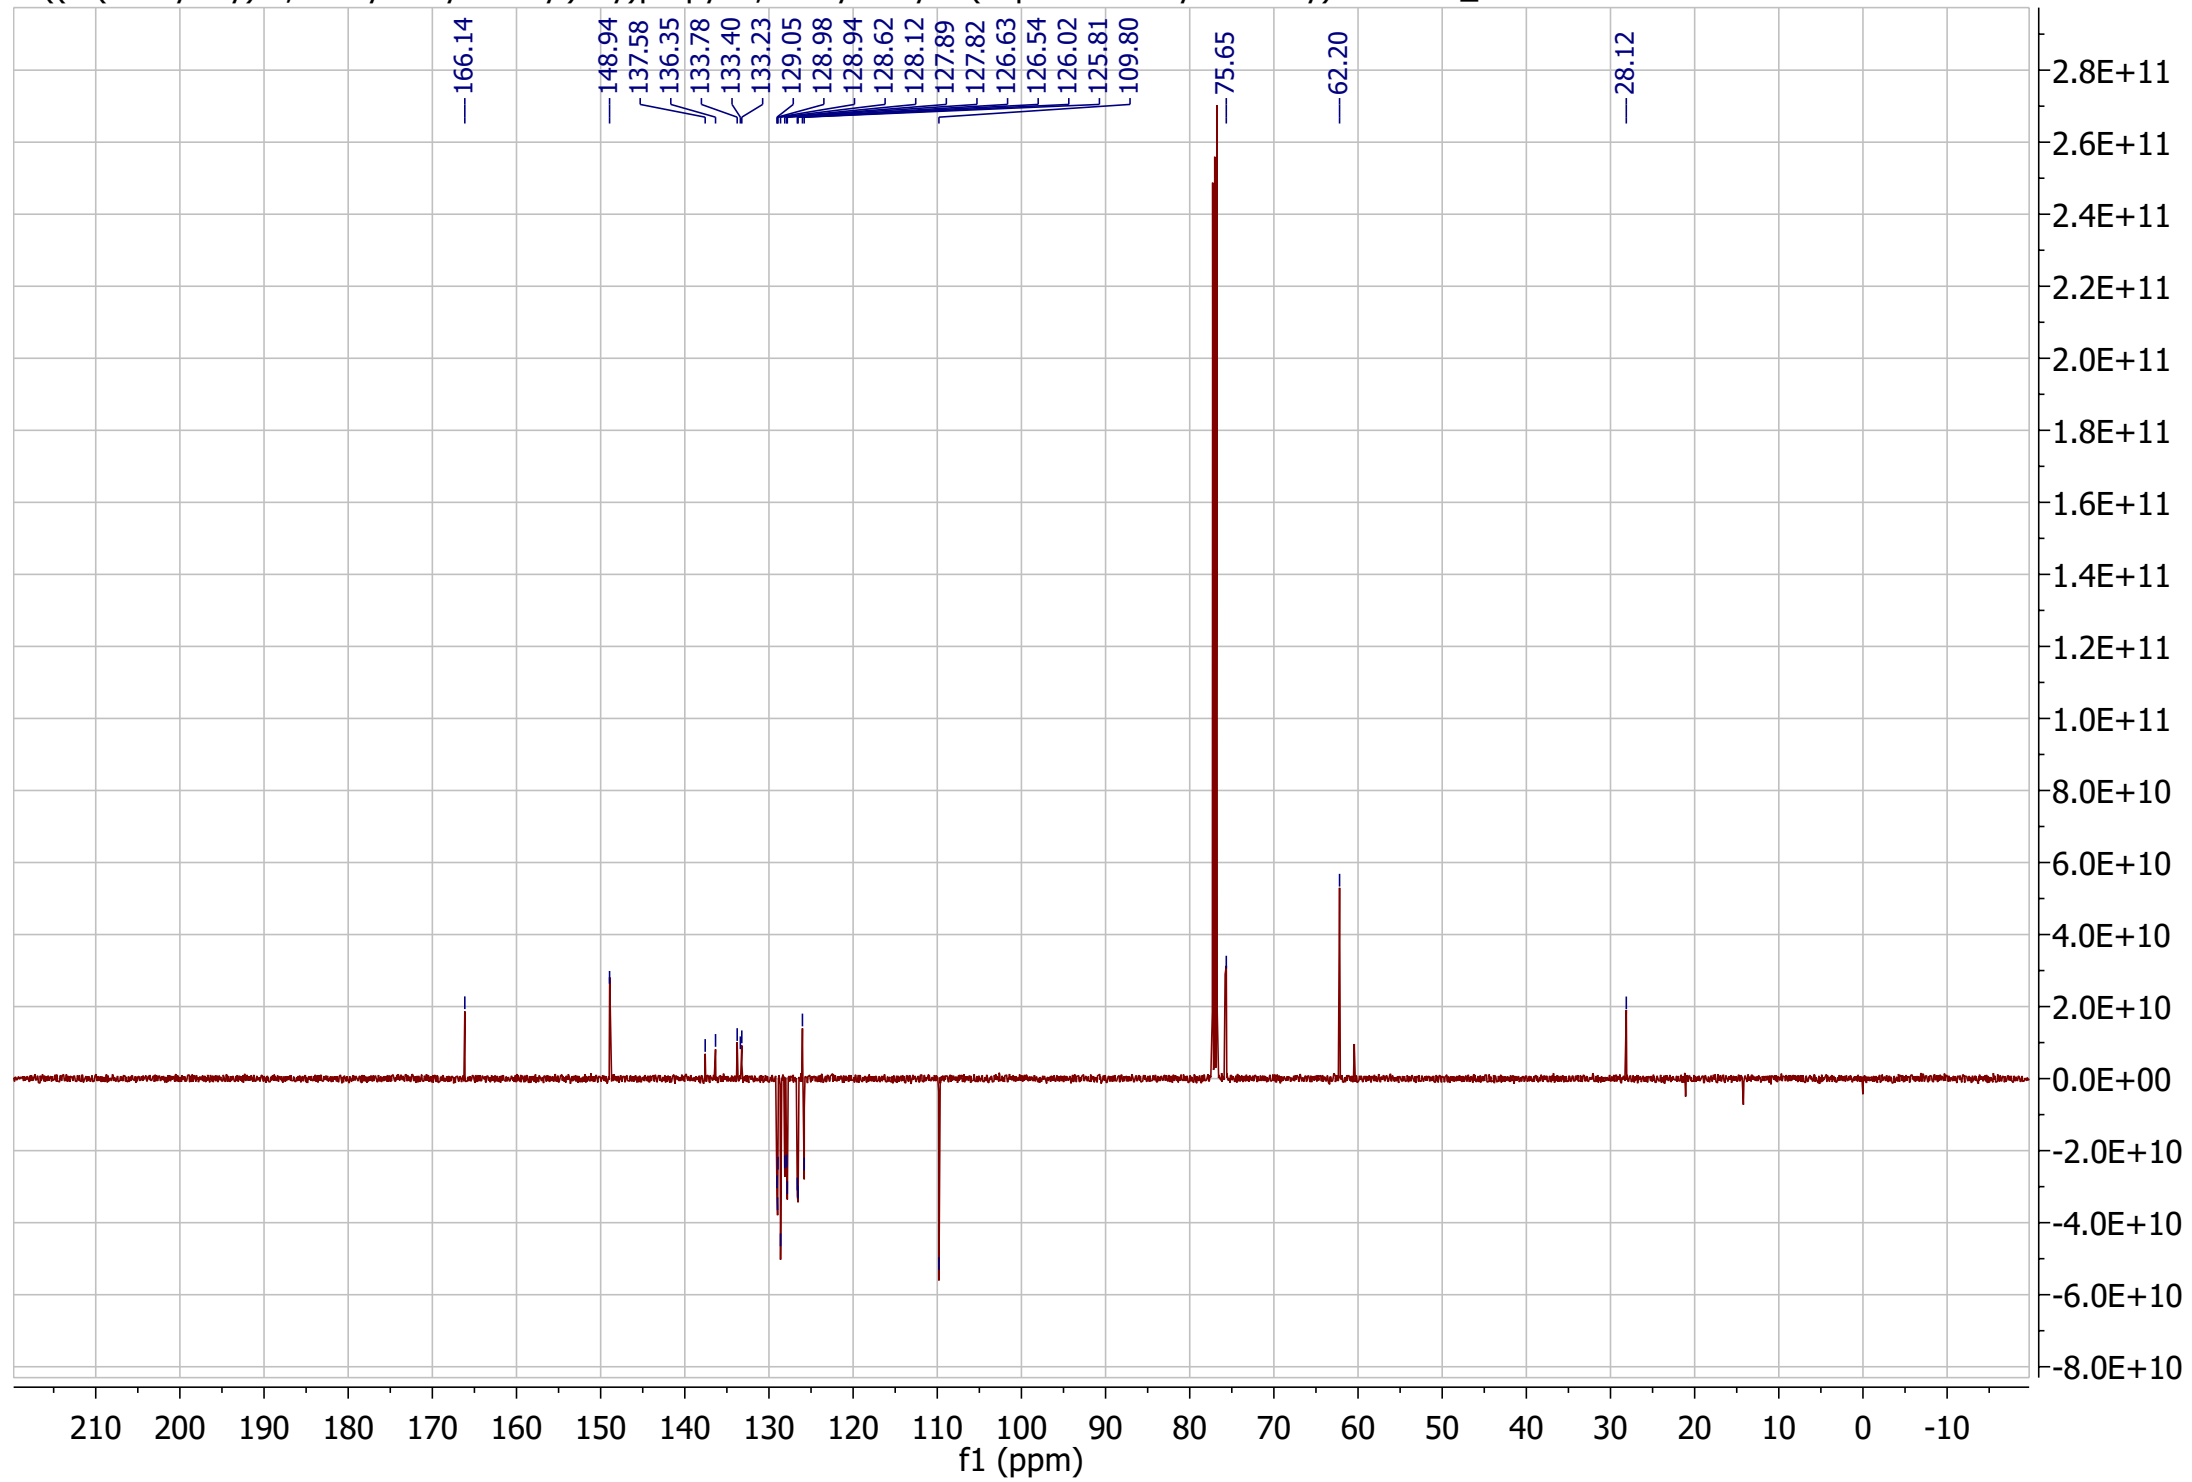

GID230\_CCl3.10.1.1r  
GID230\_CDCI3

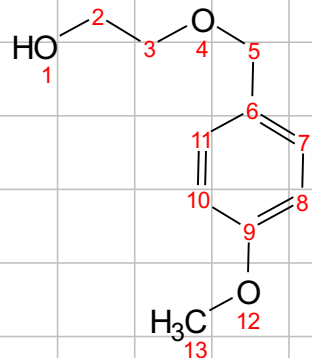

7.28  
7.26  
6.90  
6.88

4.49

3.81  
3.74  
3.57

1.00

0.93

0.93

1.46

0.95

0.93

12.0 11.5 11.0 10.5 10.0 9.5 9.0 8.5 8.0 7.5 7.0 6.5 6.0 5.5 5.0 4.5 4.0 3.5 3.0 2.5 2.0 1.5 1.0 0.5 0.0

f1 (ppm)

1.70E+12  
1.60E+12  
1.50E+12  
1.40E+12  
1.30E+12  
1.20E+12  
1.10E+12  
1.00E+12  
9.00E+11  
8.00E+11  
7.00E+11  
6.00E+11  
5.00E+11  
4.00E+11  
3.00E+11  
2.00E+11  
1.00E+11  
0.00E+00  
-1.00E+11

GID230\_CCl3.12.1.1r  
GID230\_CDCl3

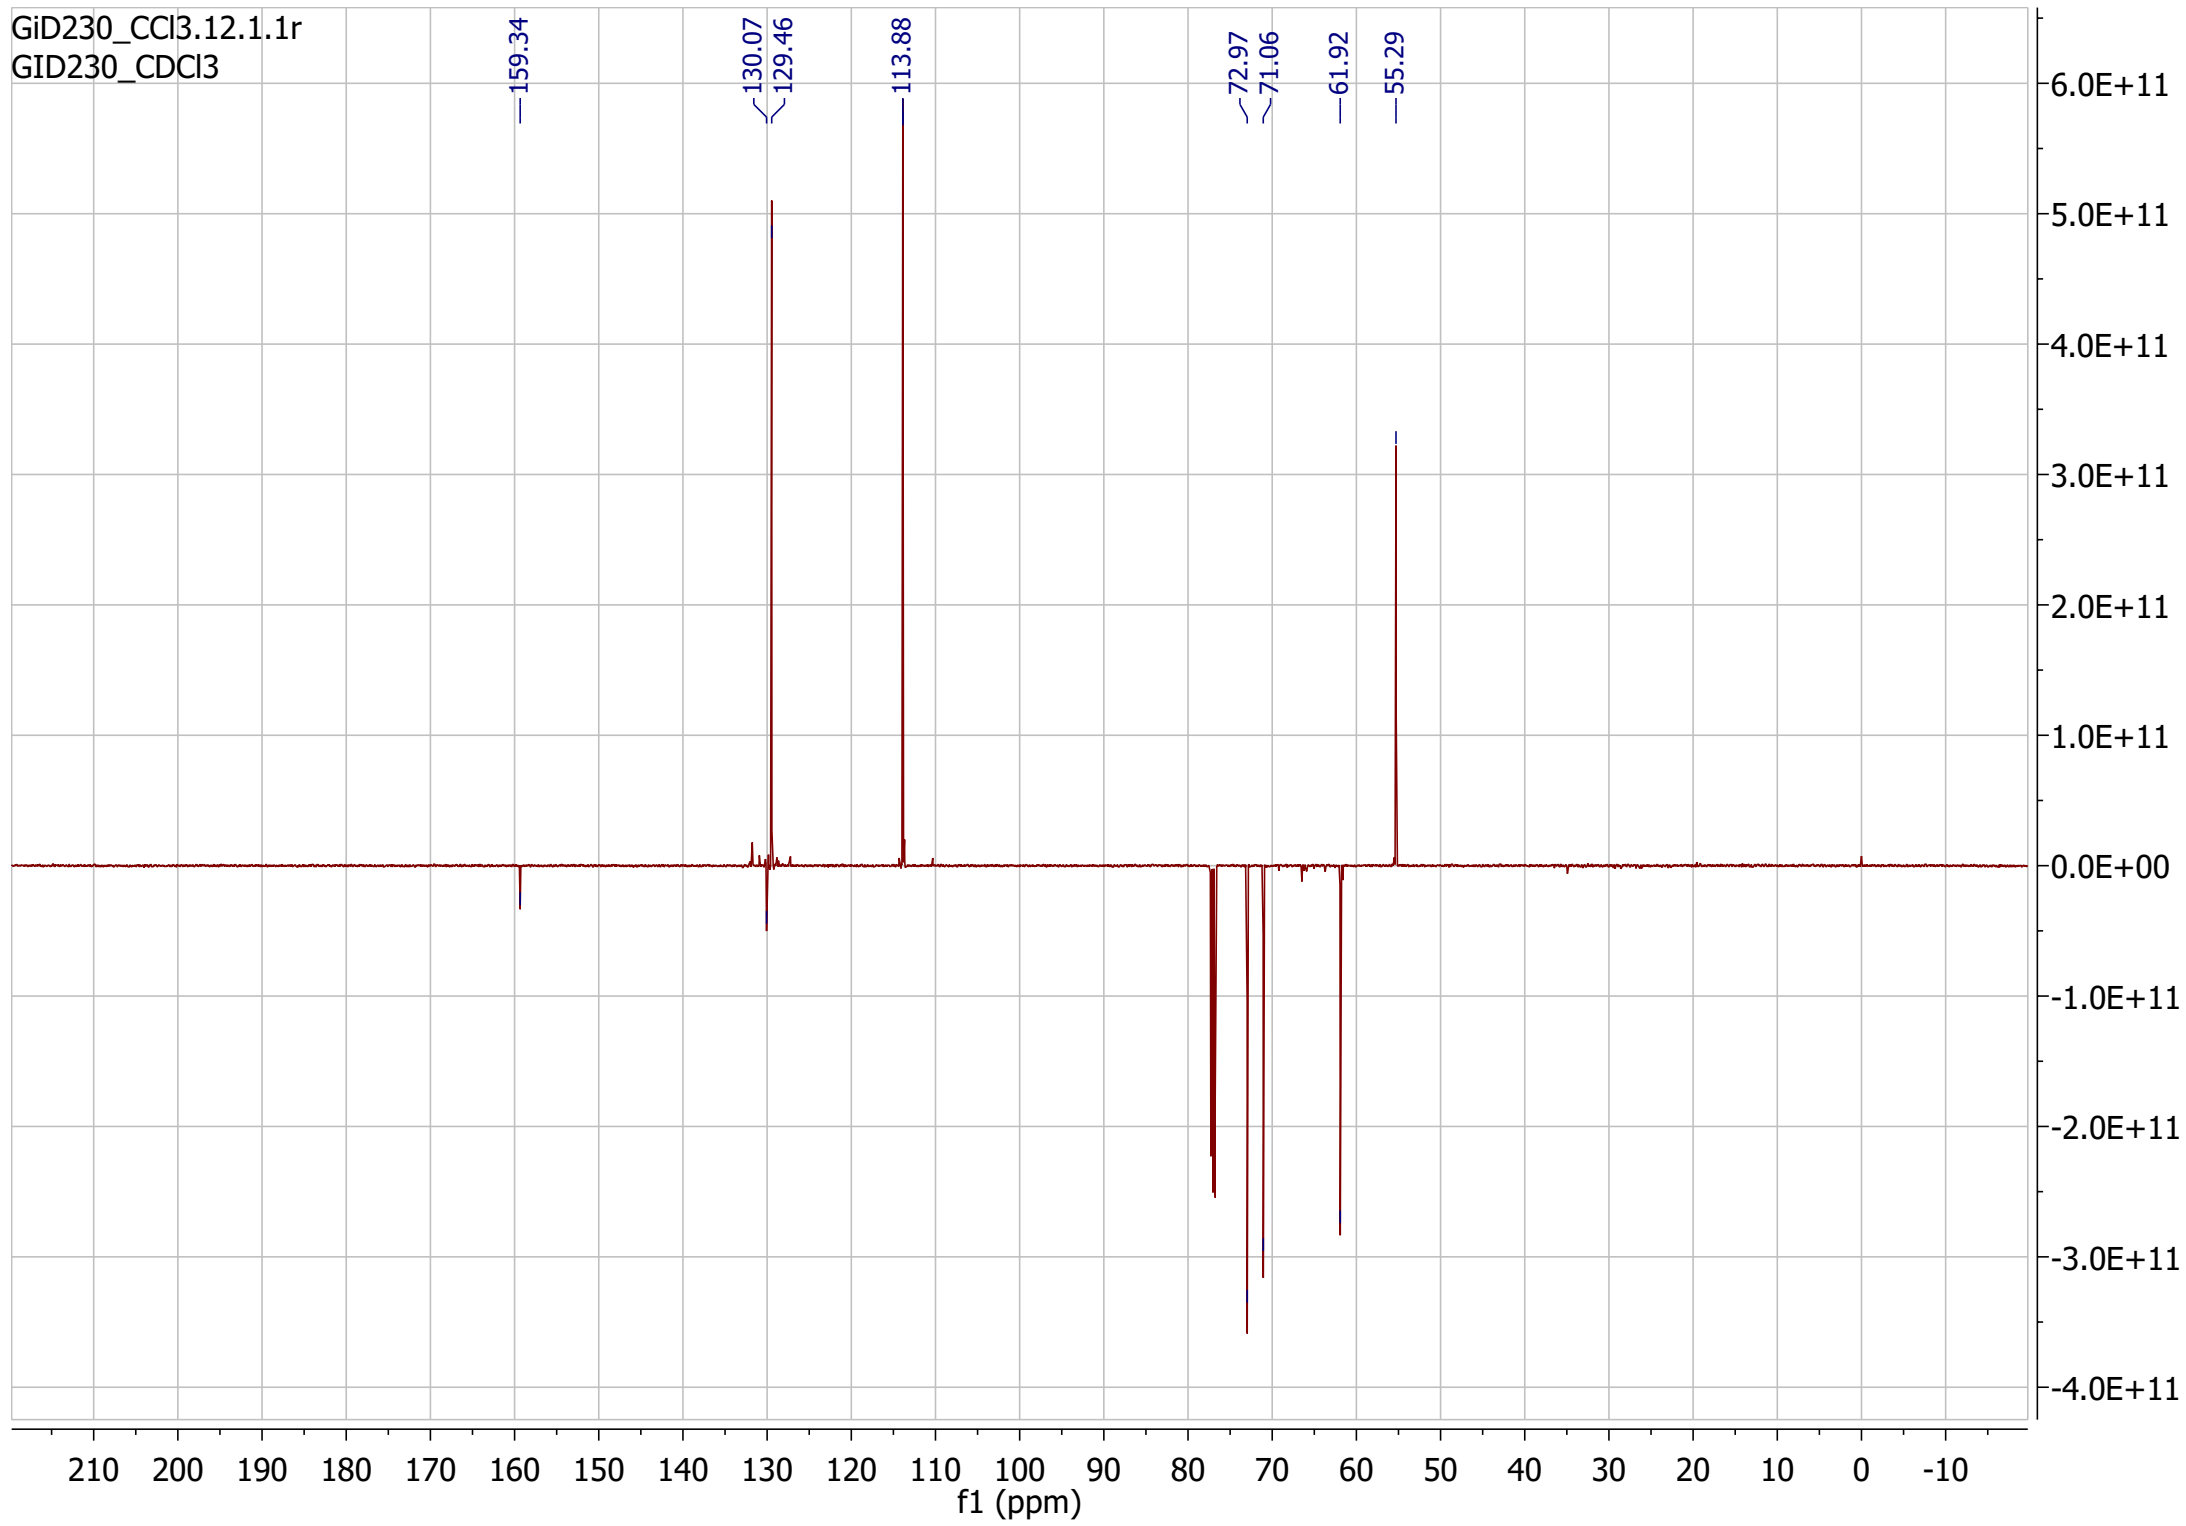

3-((4-methoxybenzyl)oxy)propan-1-ol\_CDCl3

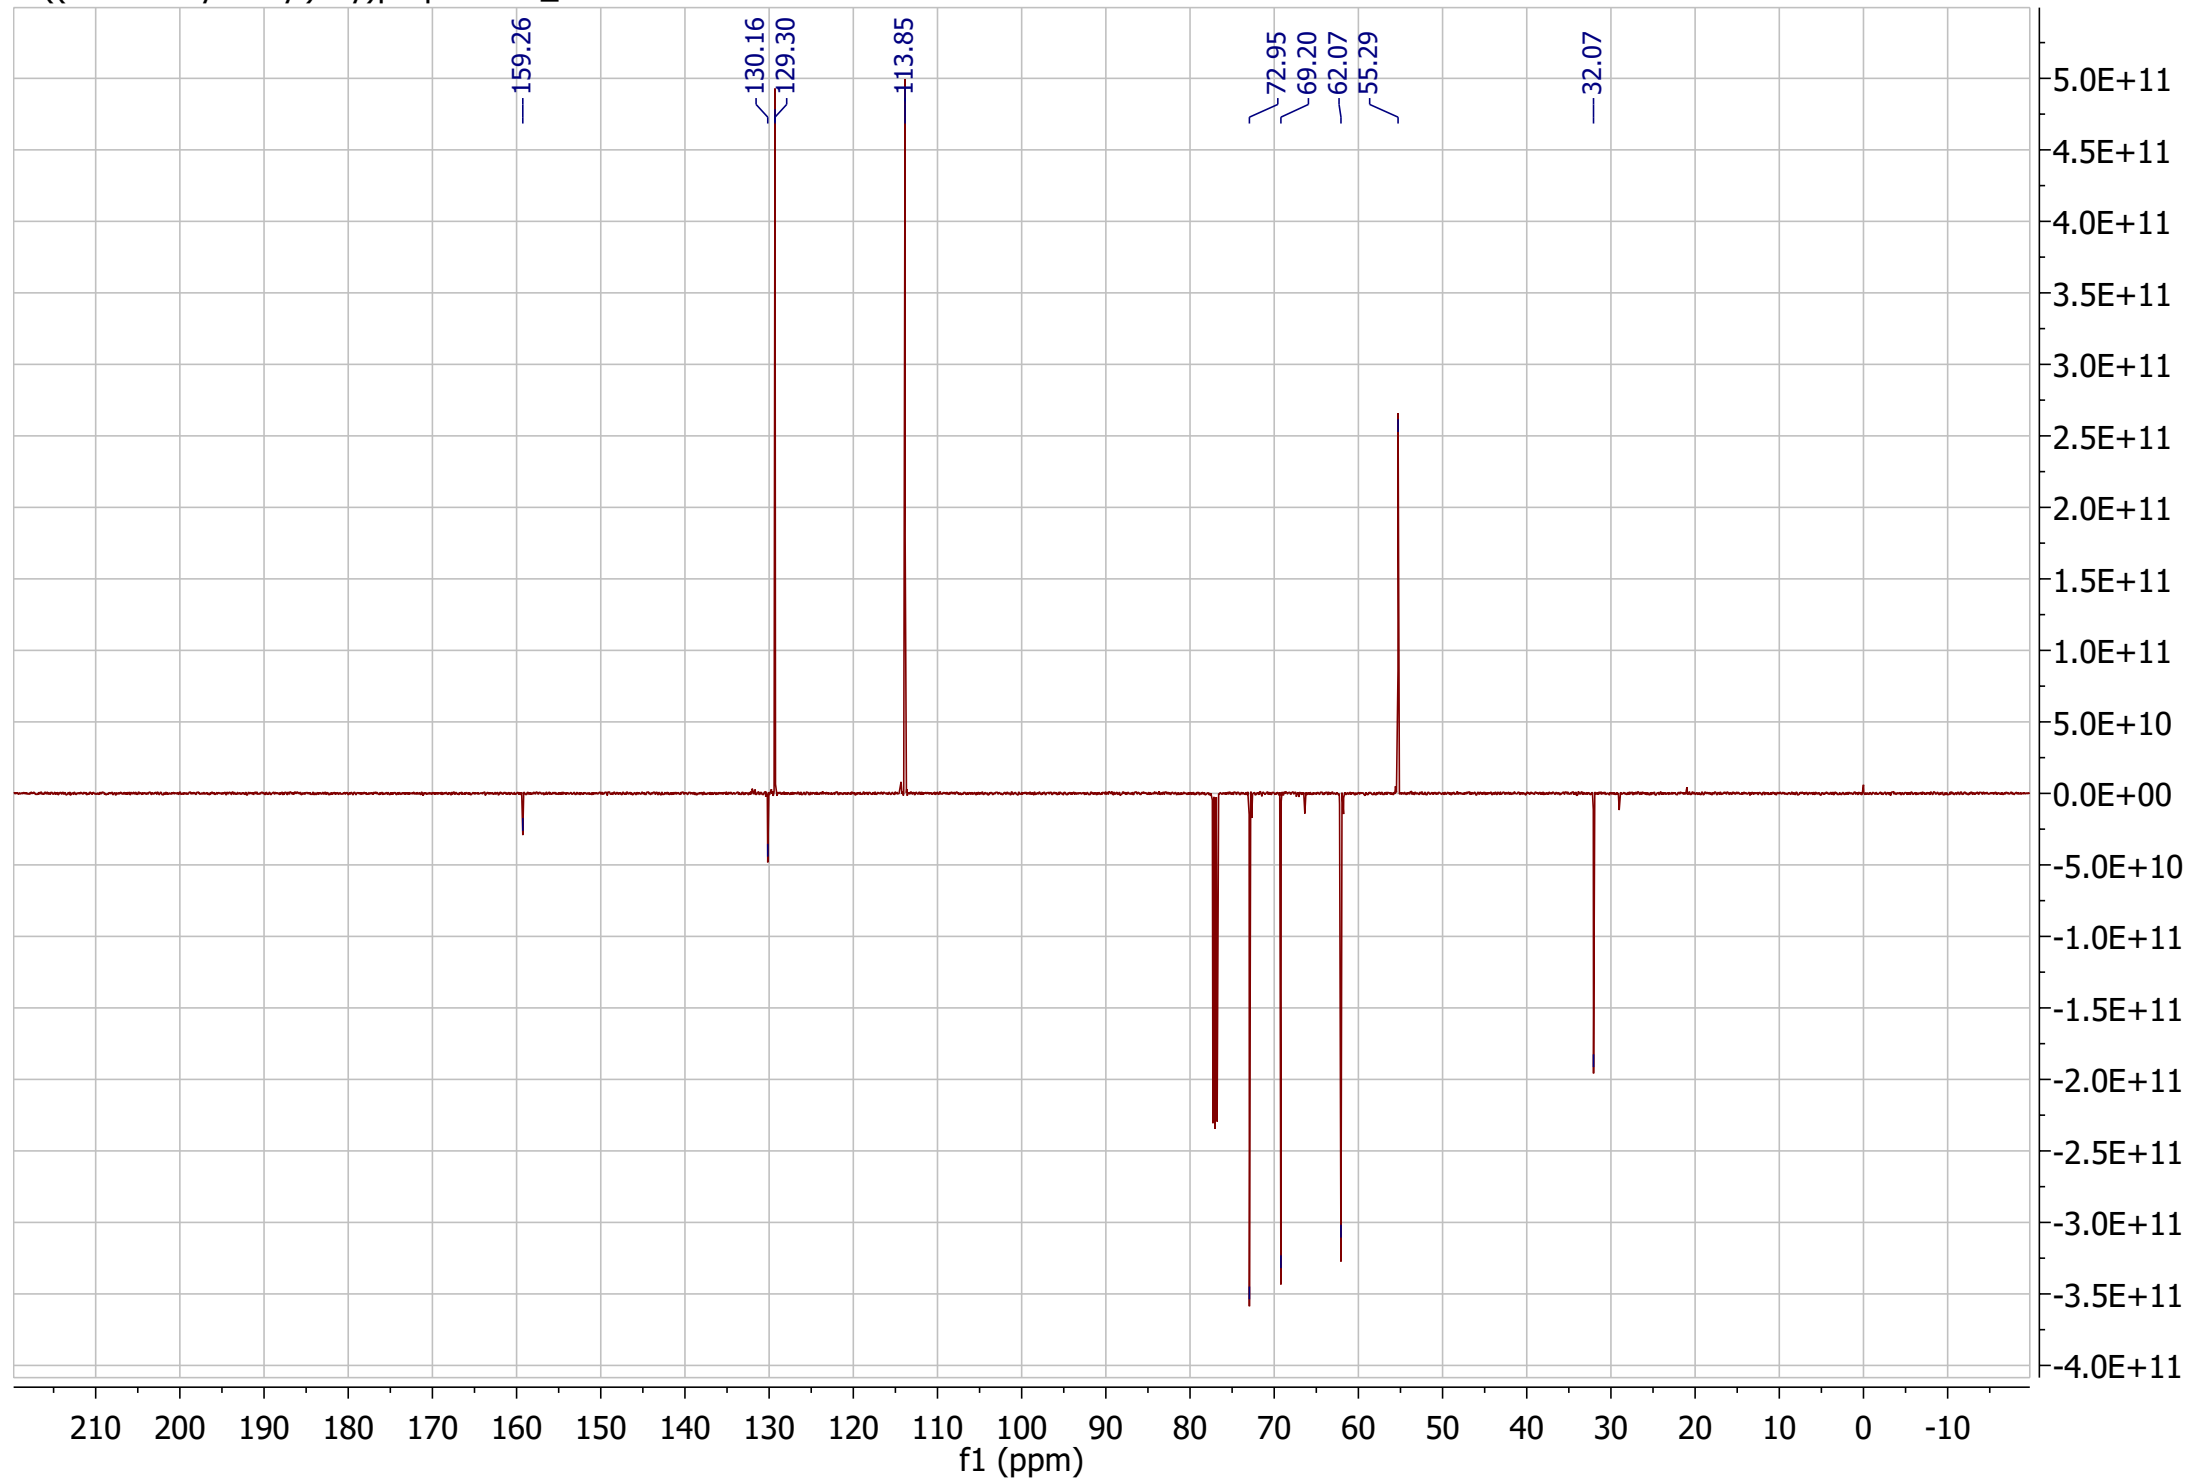

3-((4-methoxybenzyl)oxy)propan-1-ol\_CDCI3

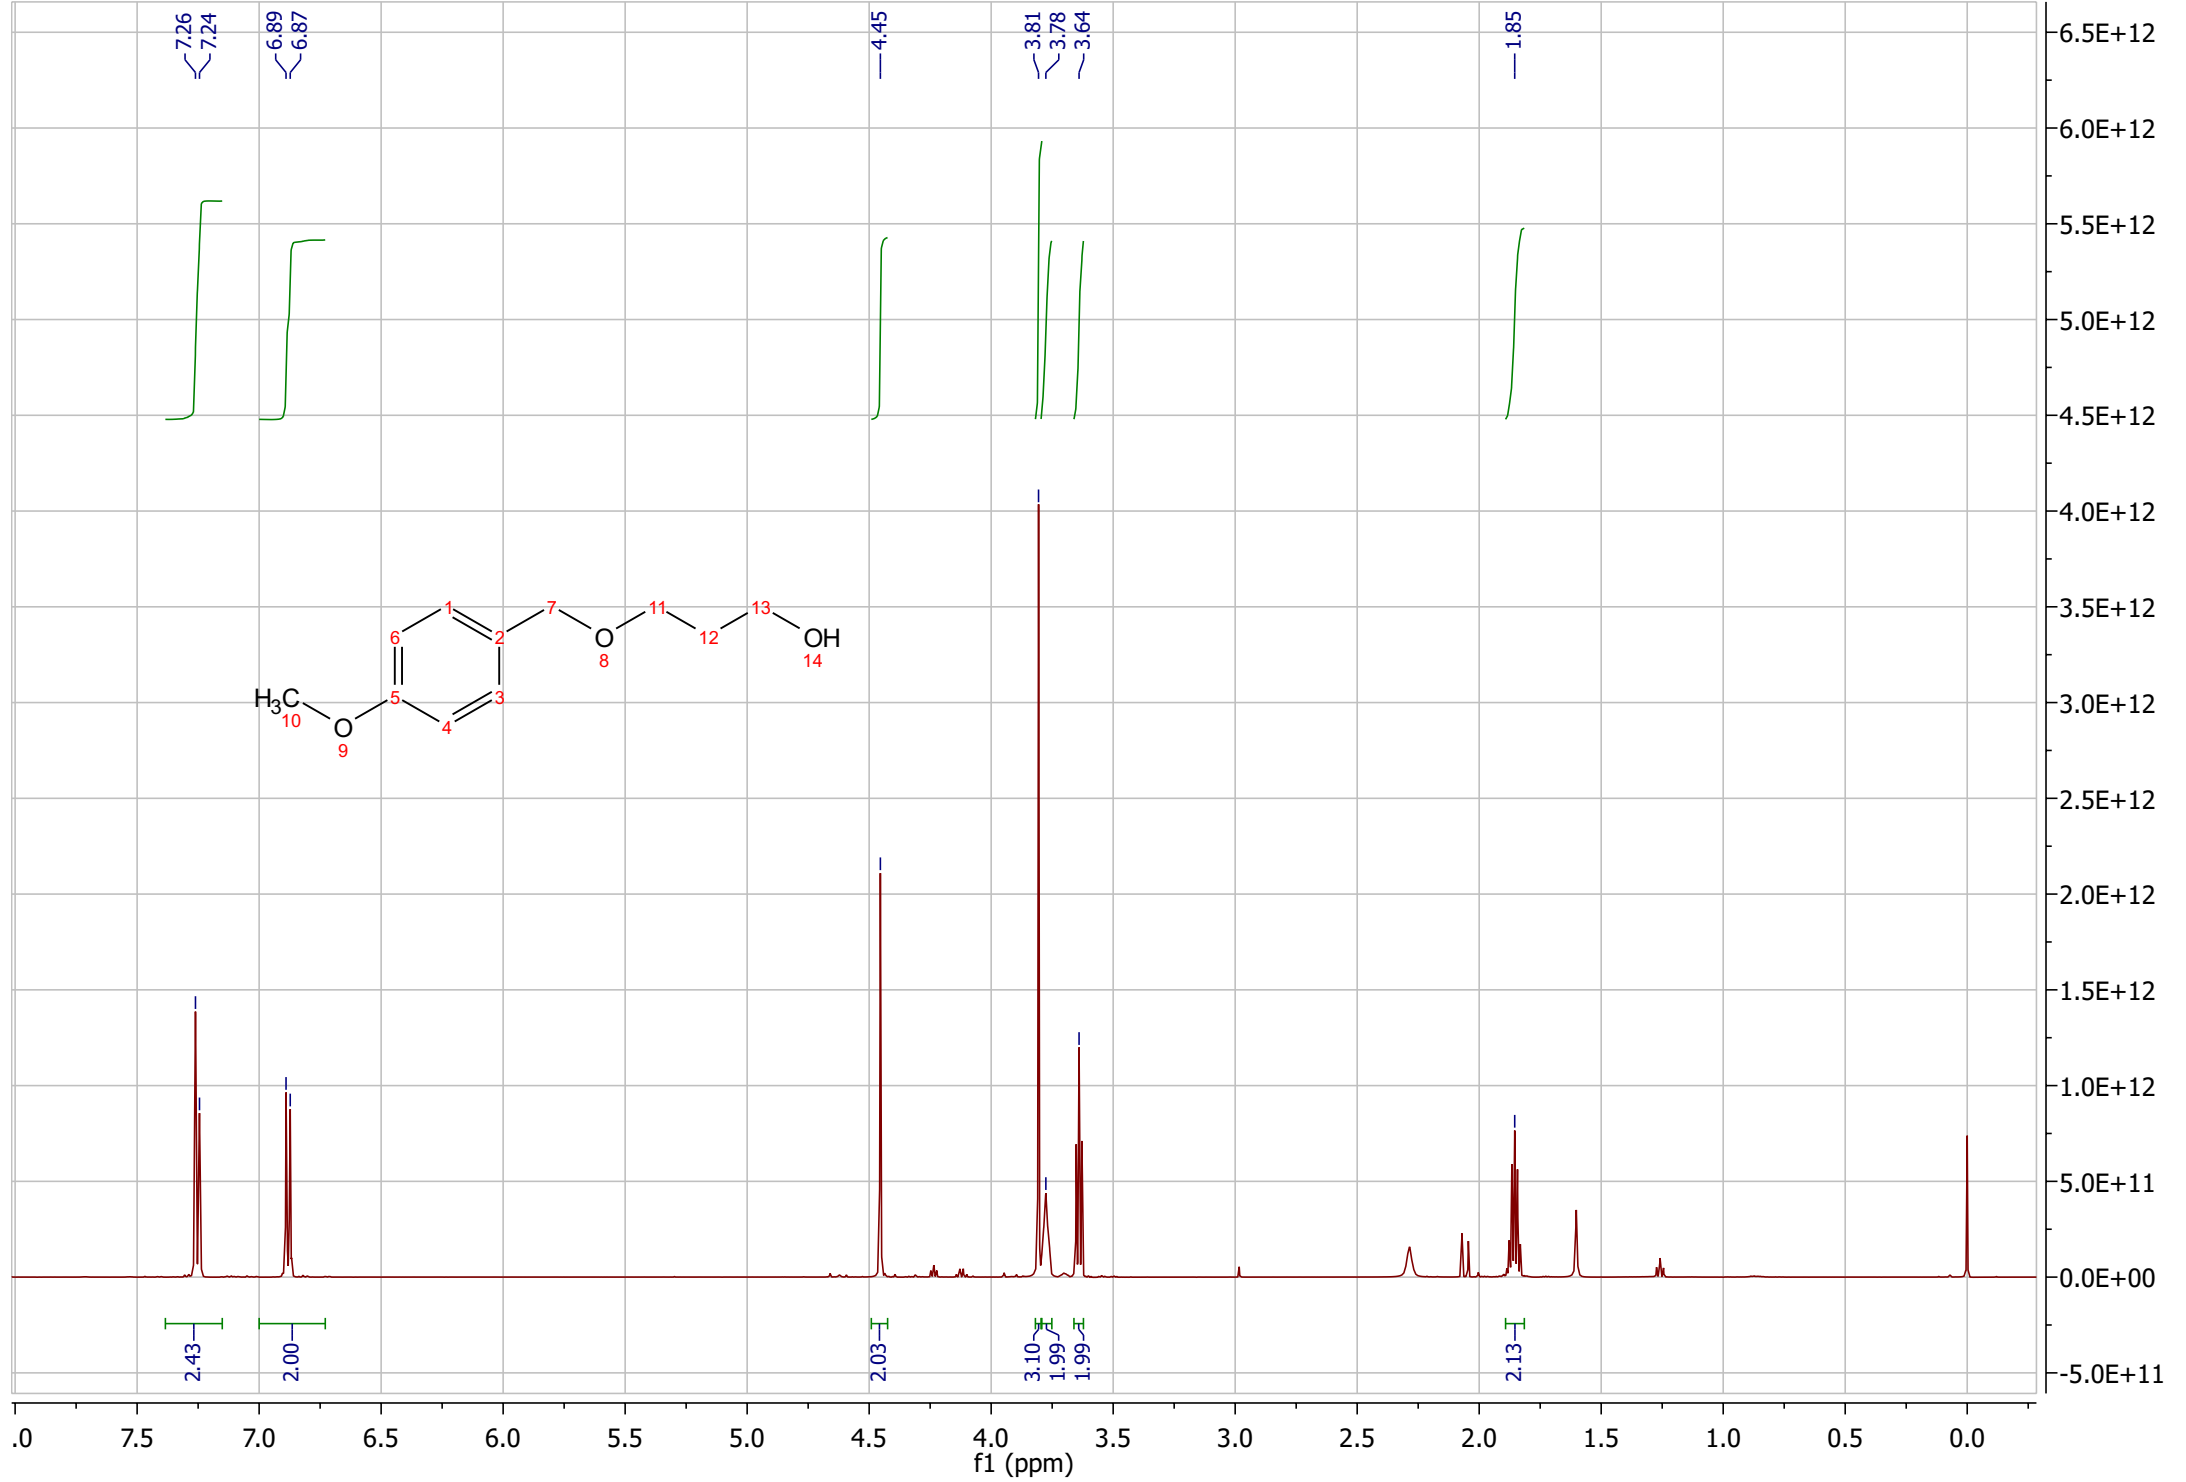

4-paramethoxybenzyloxybutanol\_CDCI3

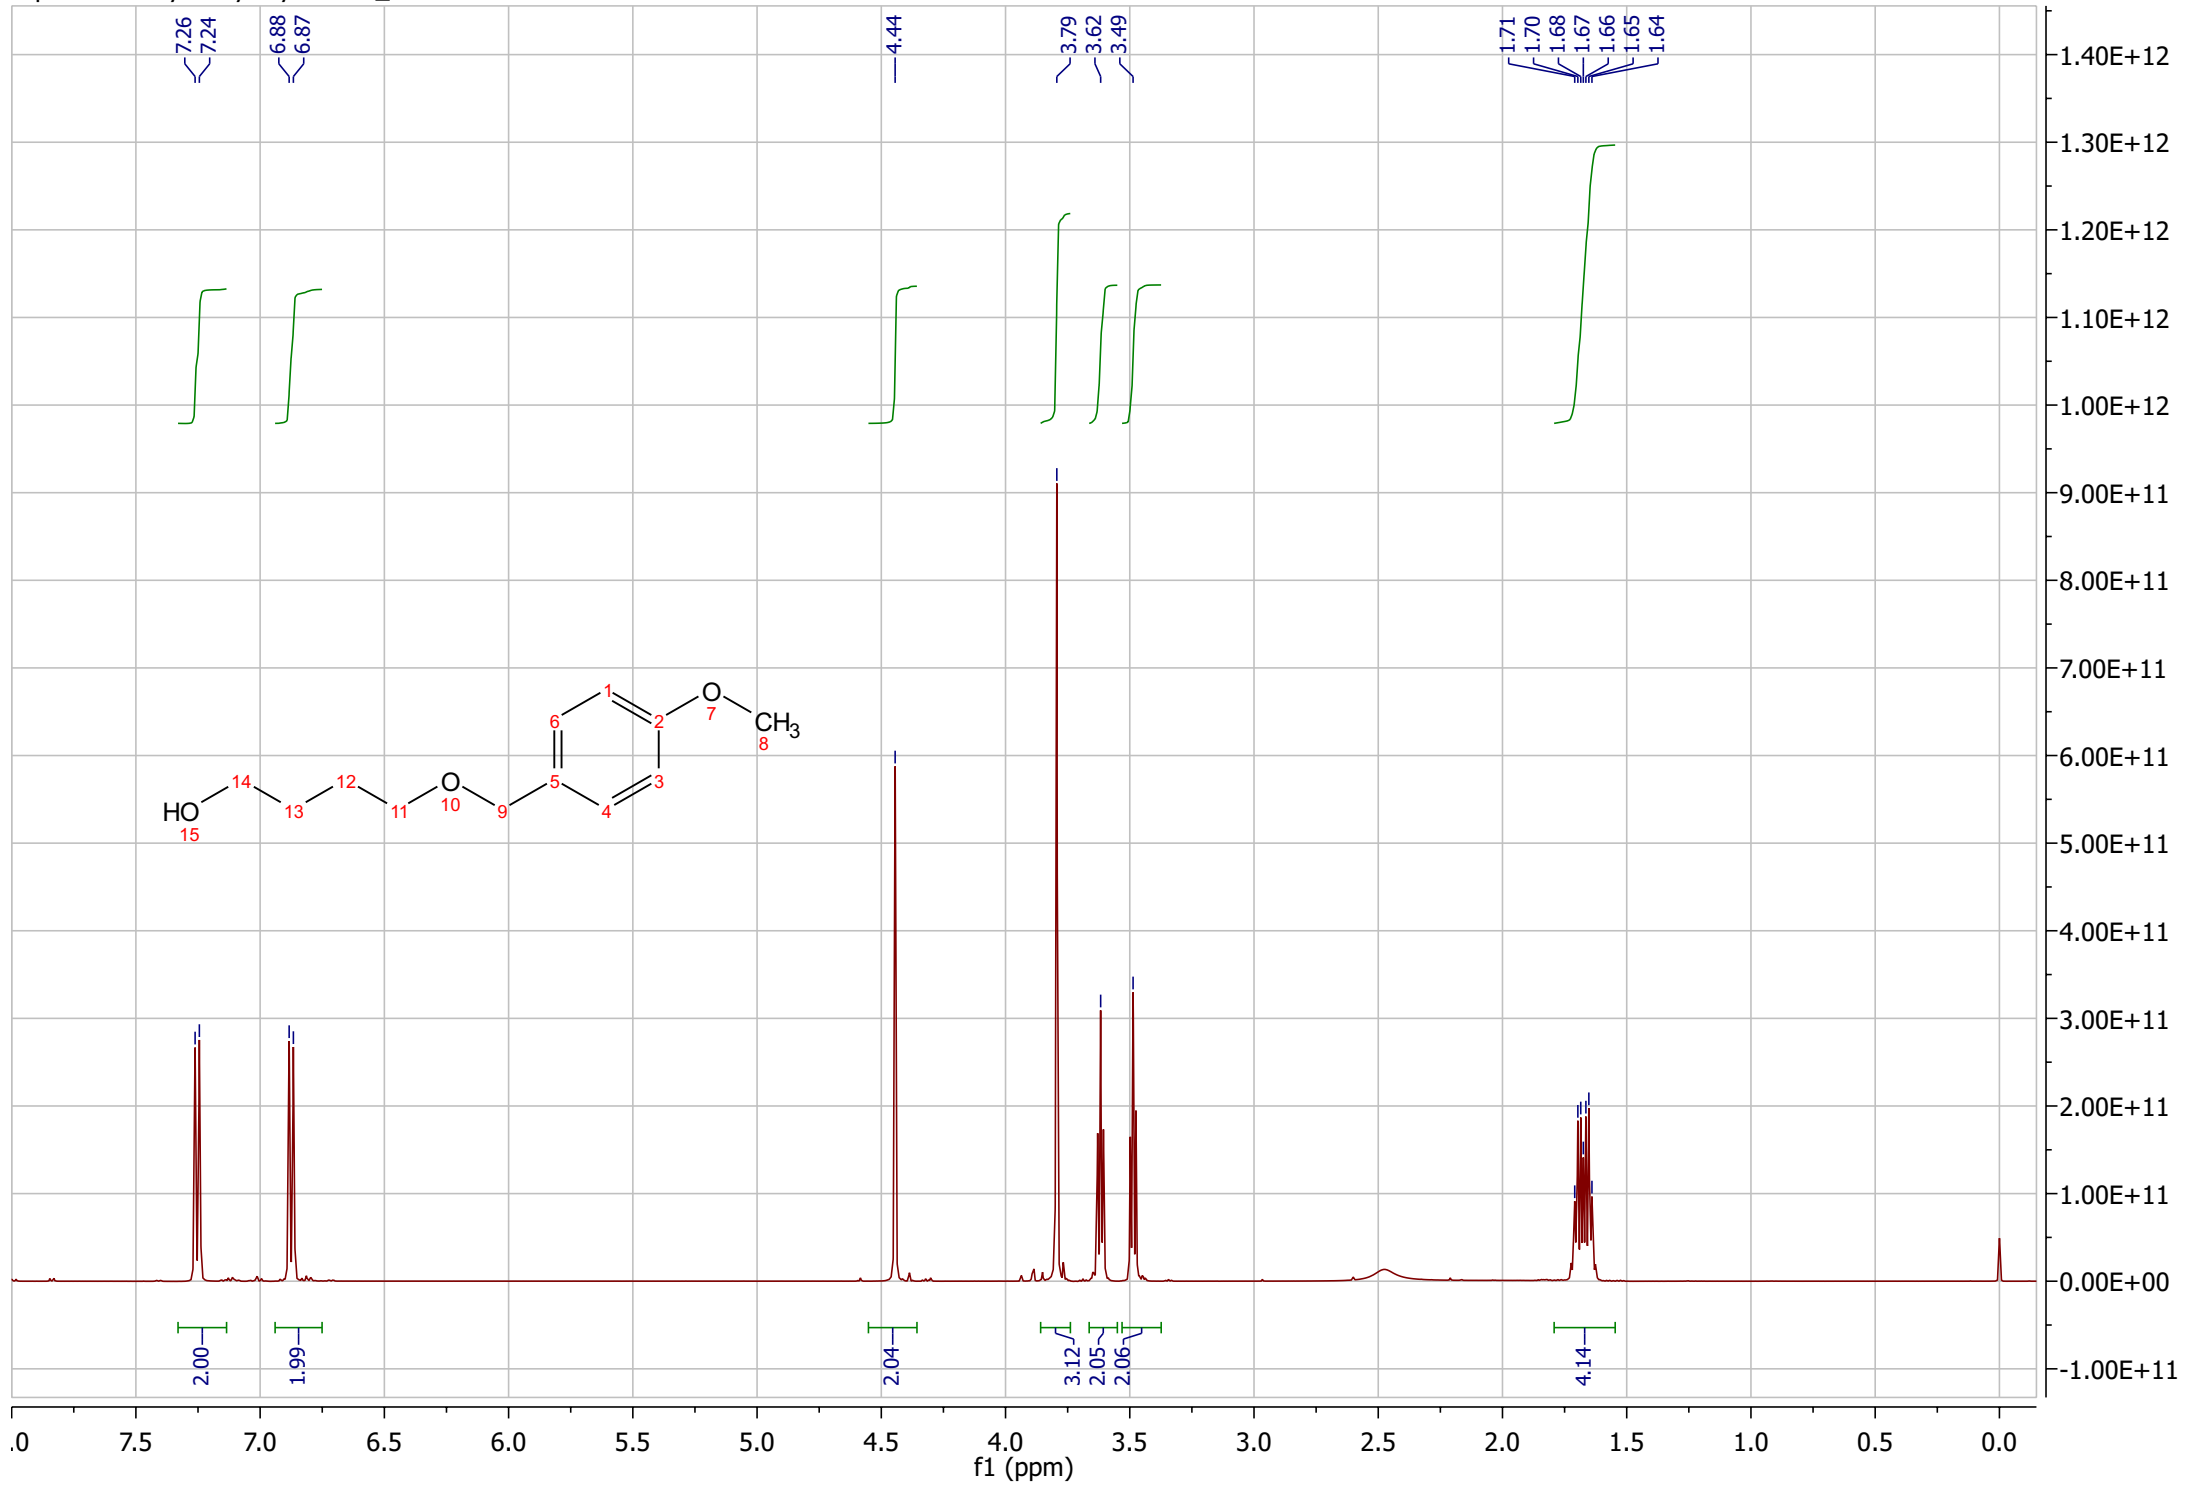

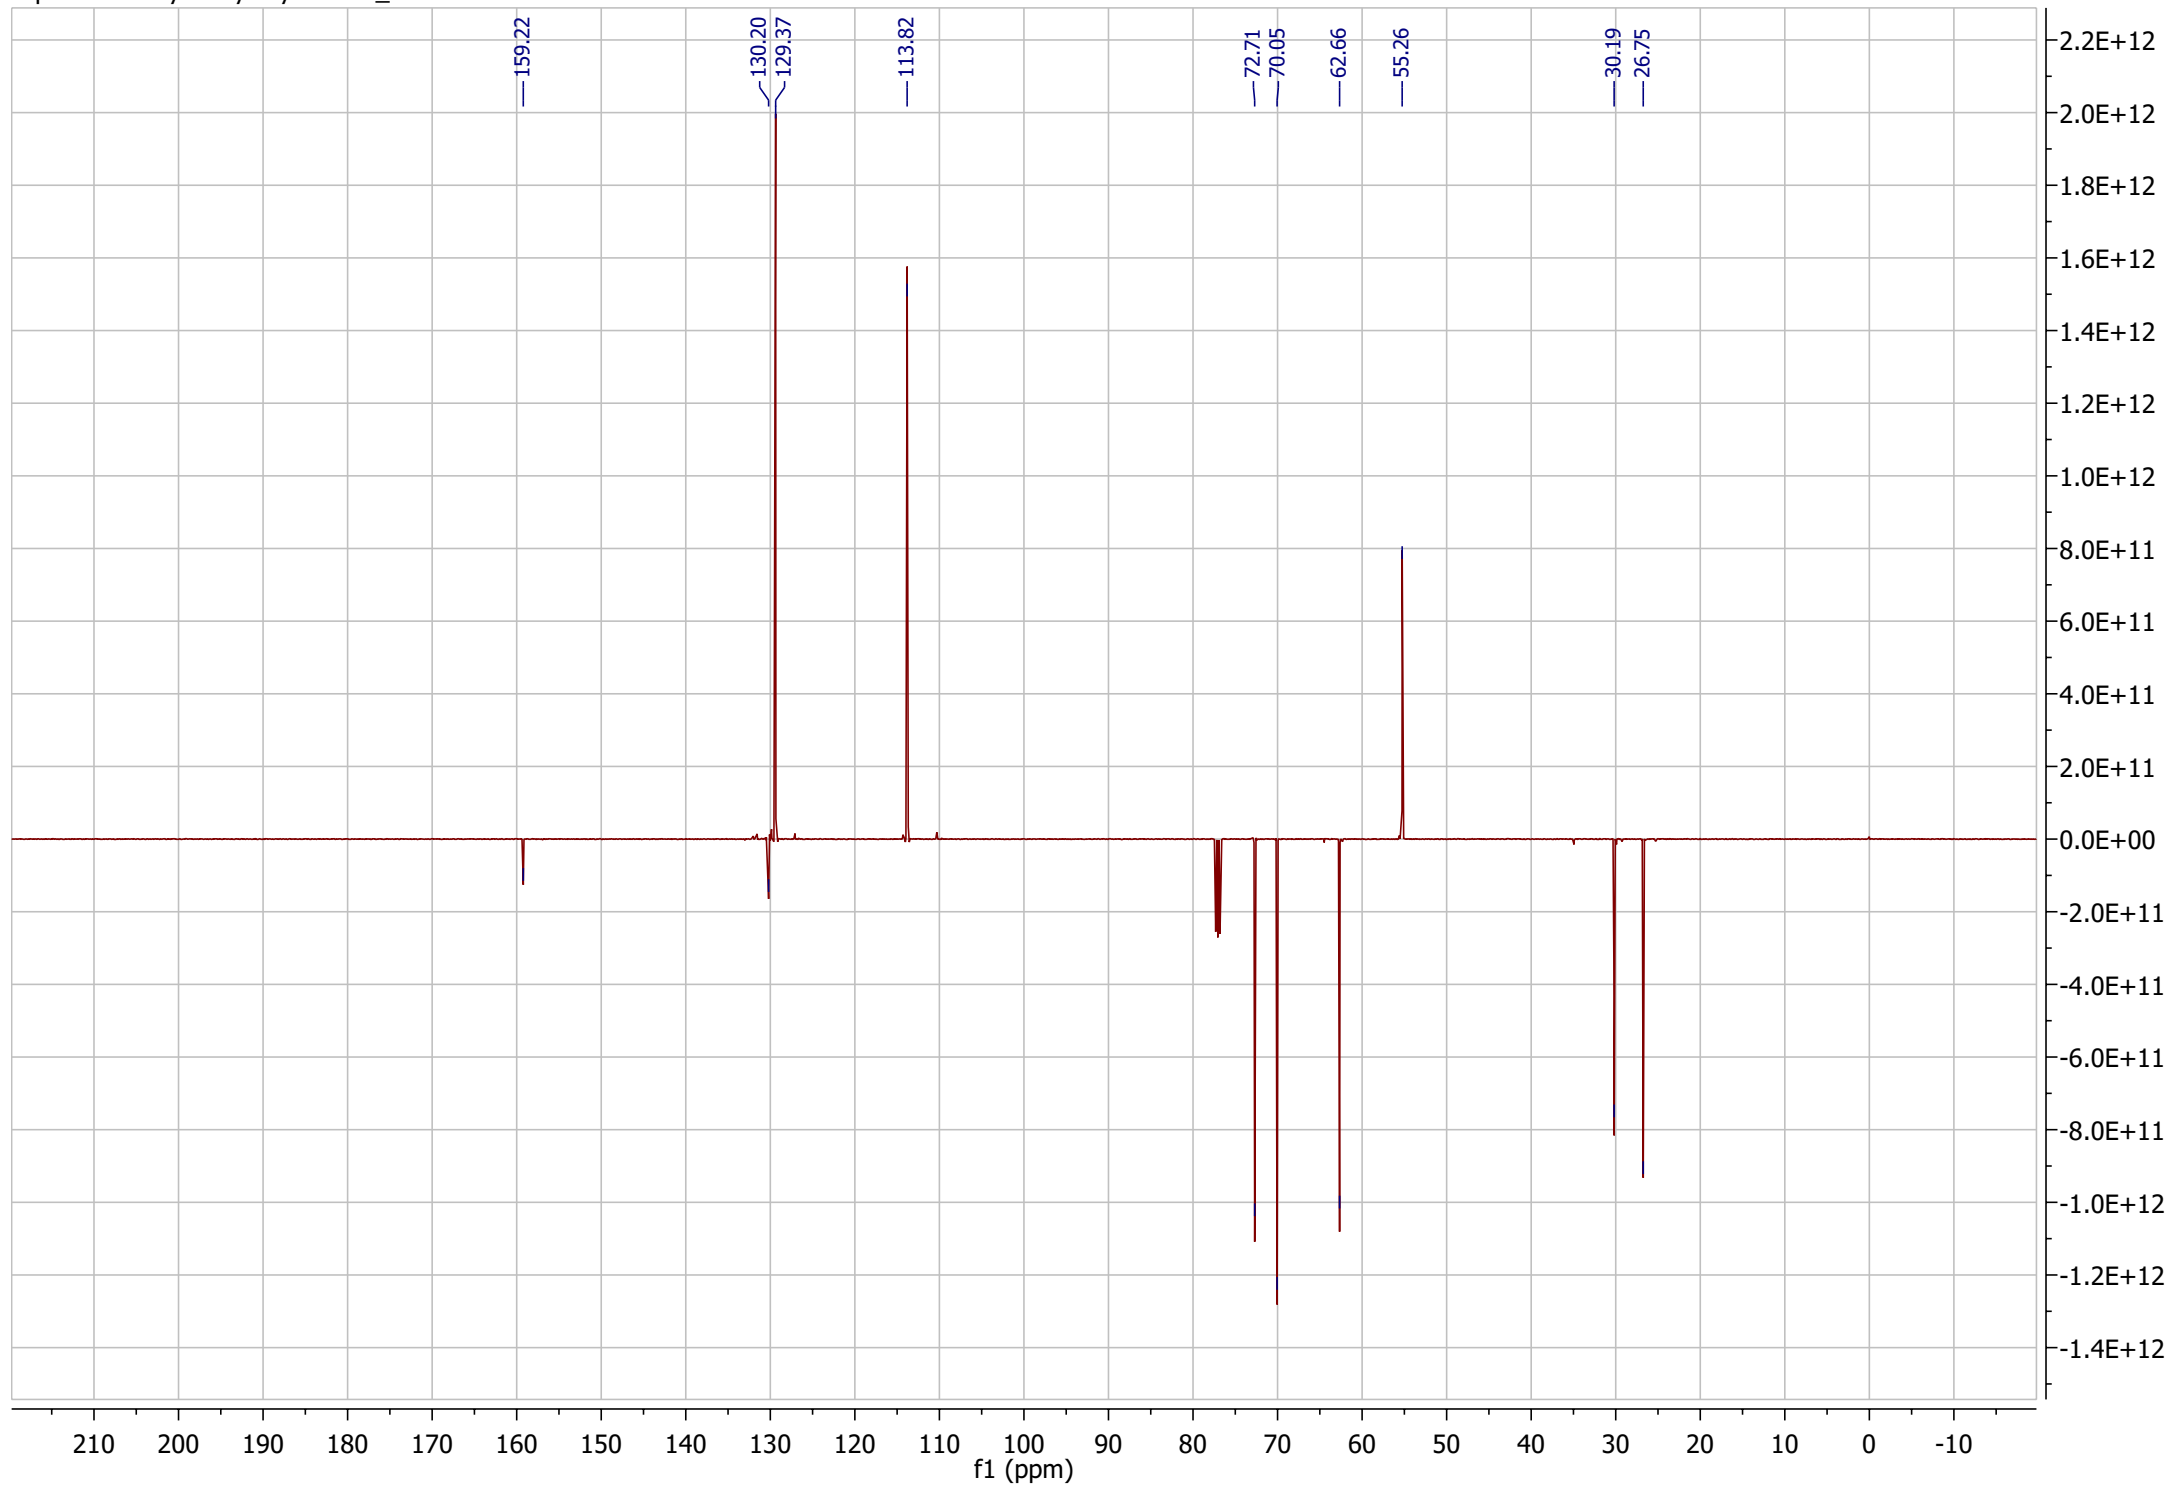

Methyl 3,4,5-tribenzyloxybenzoate\_DMSO

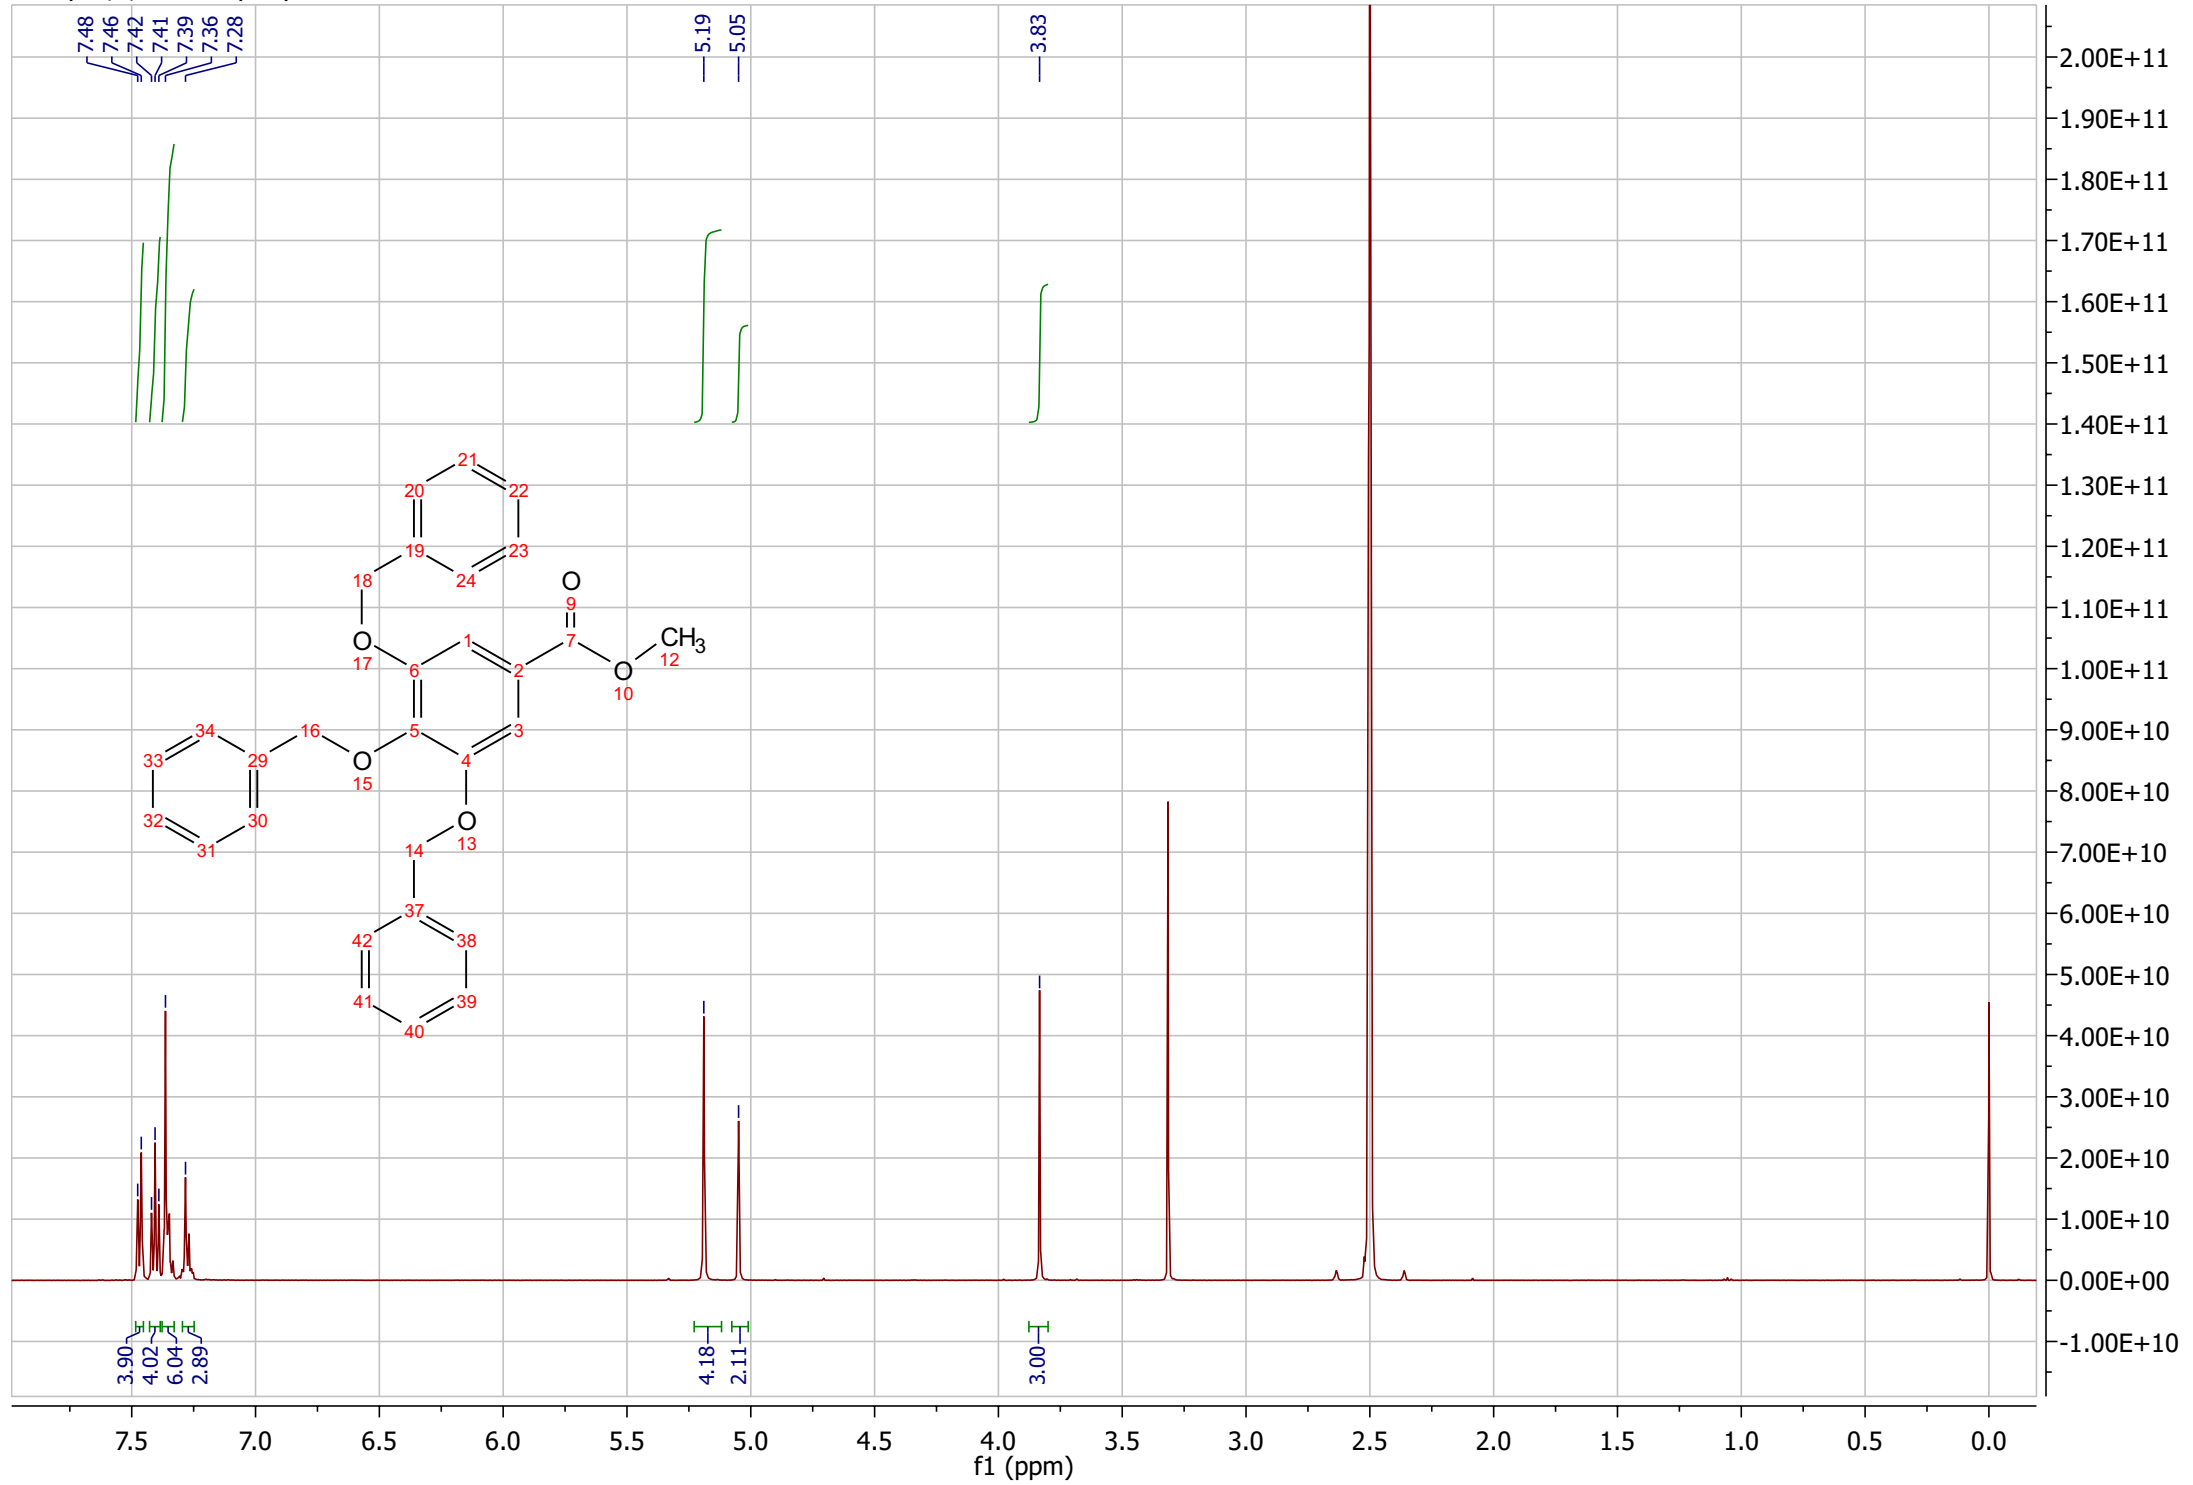



Methyl 3,4,5-tribenzyloxybenzoate\_DMSO

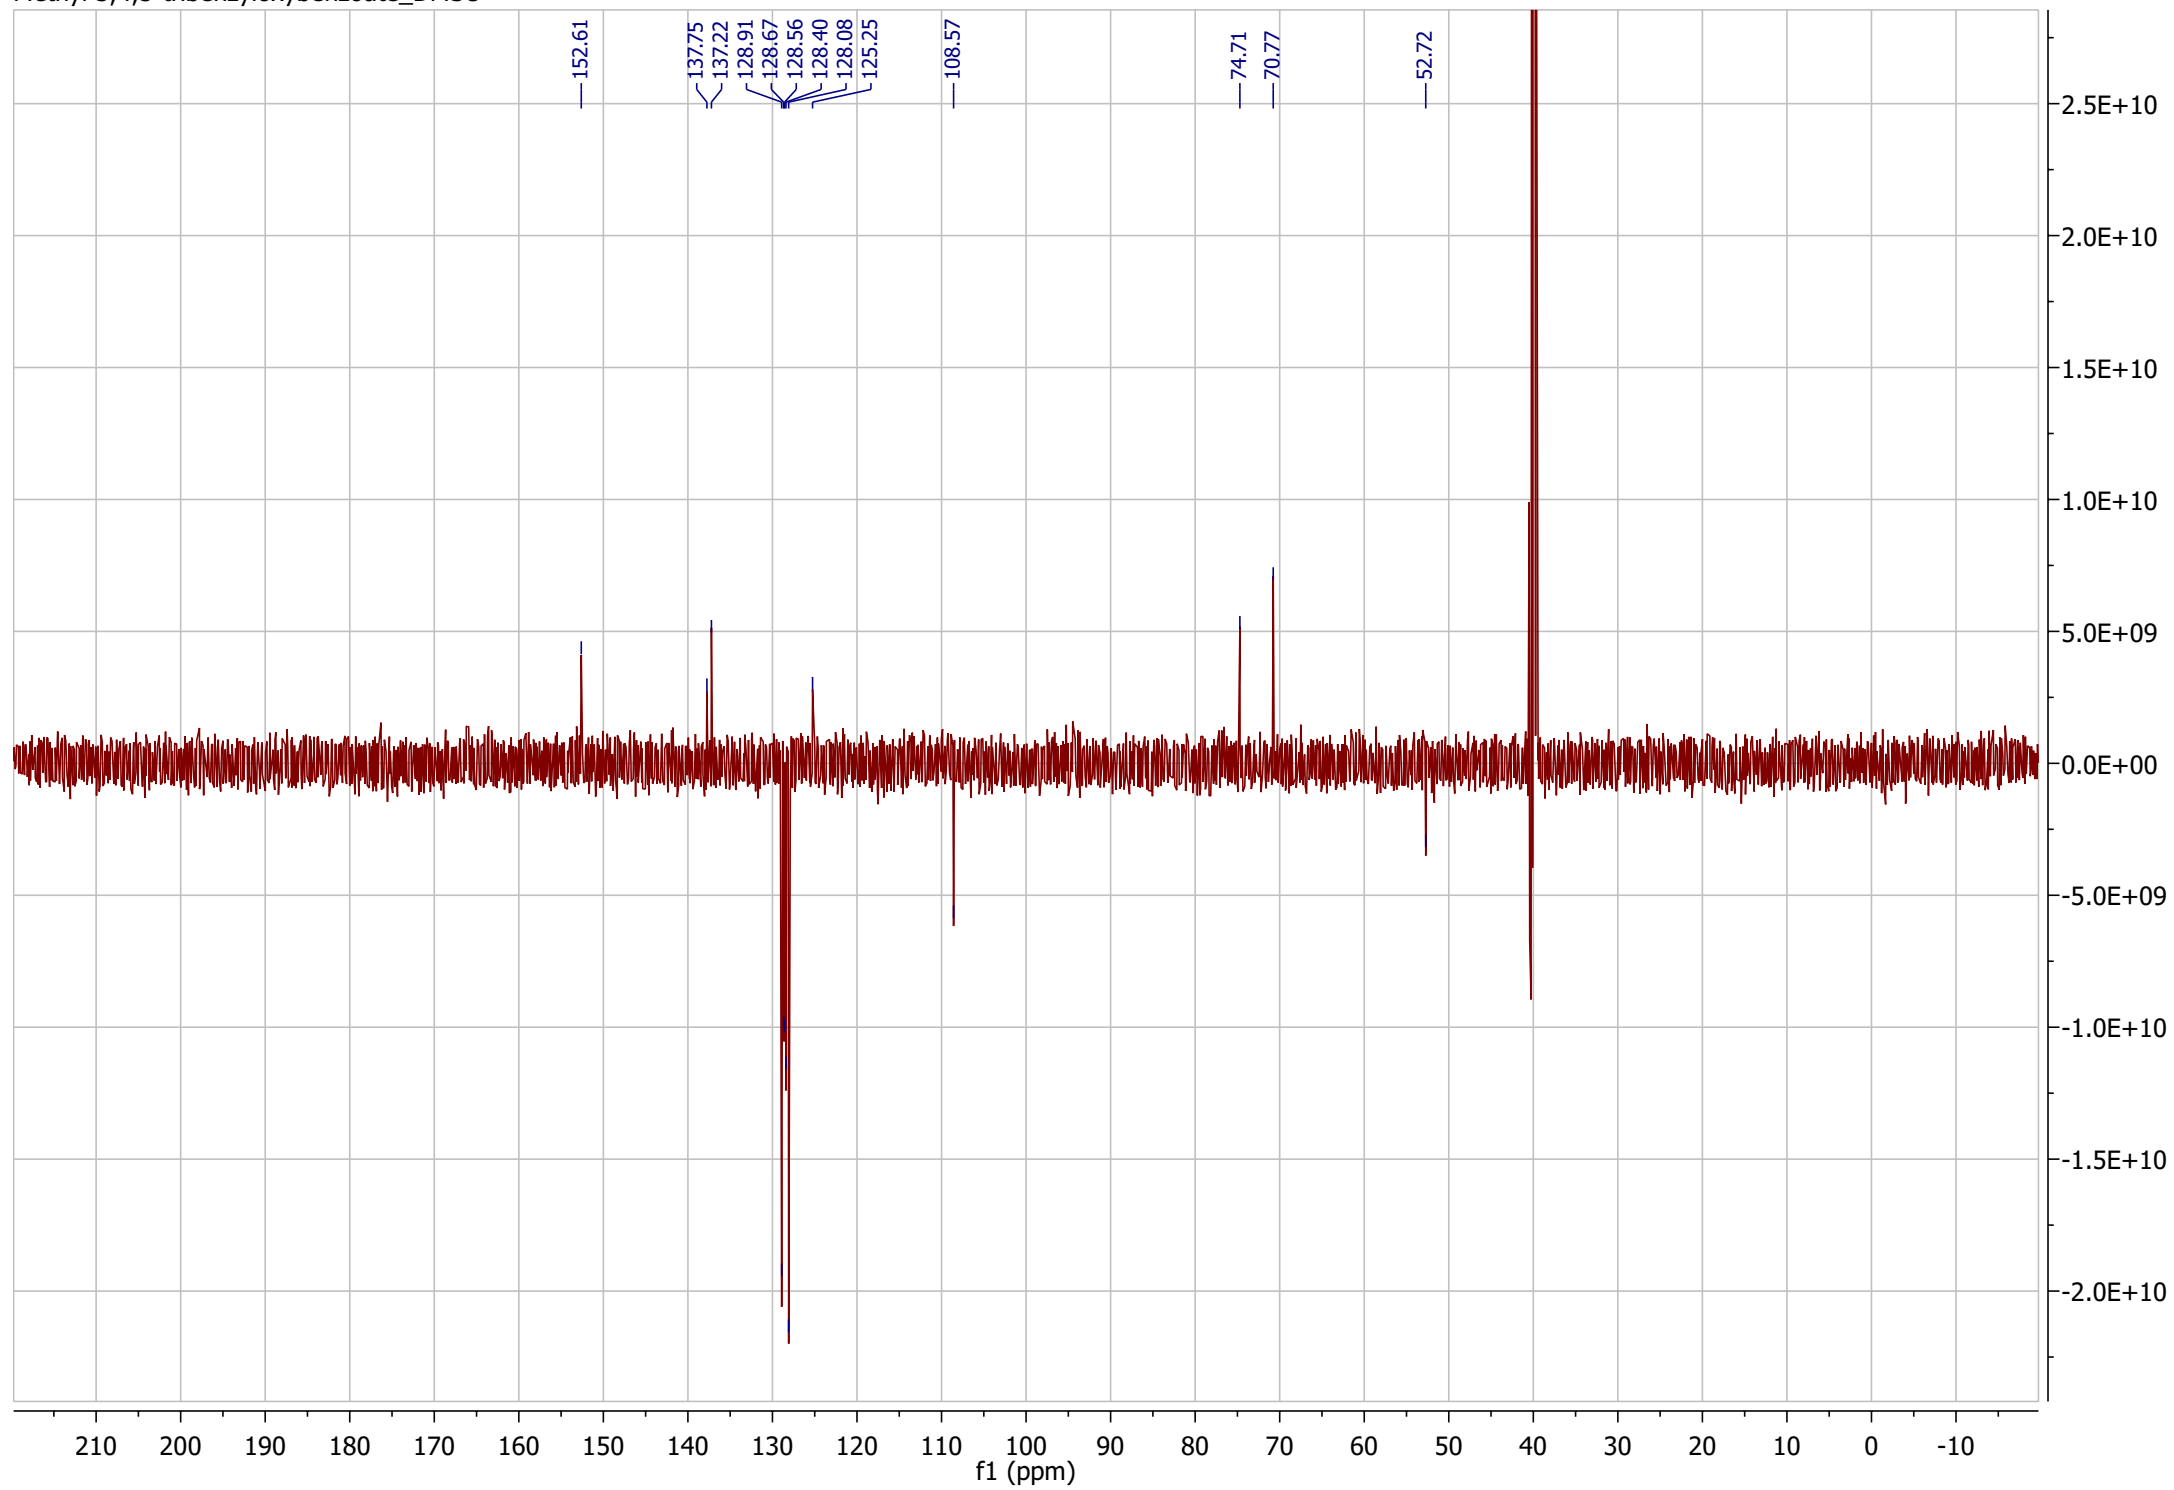

Methyl 3,4-dibenzyloxybenzoate\_CDCl3

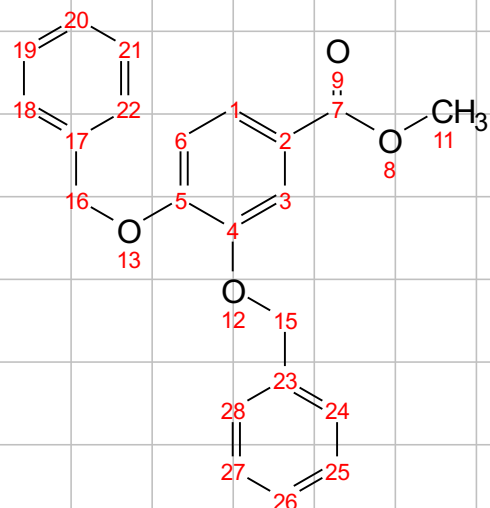

7.64  
7.63  
7.62  
7.62  
7.48  
7.46  
7.44  
7.43  
7.38  
7.37  
7.35  
7.33  
7.31  
7.30

5.22  
5.19

3.87

1.90

3.76

5.64

4.00

2.94

12.0 11.5 11.0 10.5 10.0 9.5 9.0 8.5 8.0 7.5 7.0 6.5 6.0 5.5 5.0 4.5 4.0 3.5 3.0 2.5 2.0 1.5 1.0 0.5 0.0

f1 (ppm)

3.0E+11  
2.8E+11  
2.6E+11  
2.4E+11  
2.2E+11  
2.0E+11  
1.8E+11  
1.6E+11  
1.4E+11  
1.2E+11  
1.0E+11  
8.0E+10  
6.0E+10  
4.0E+10  
2.0E+10  
0.0E+00  
-2.0E+10

Methyl 3,4-dibenzyloxybenzoate CDCl<sub>3</sub>

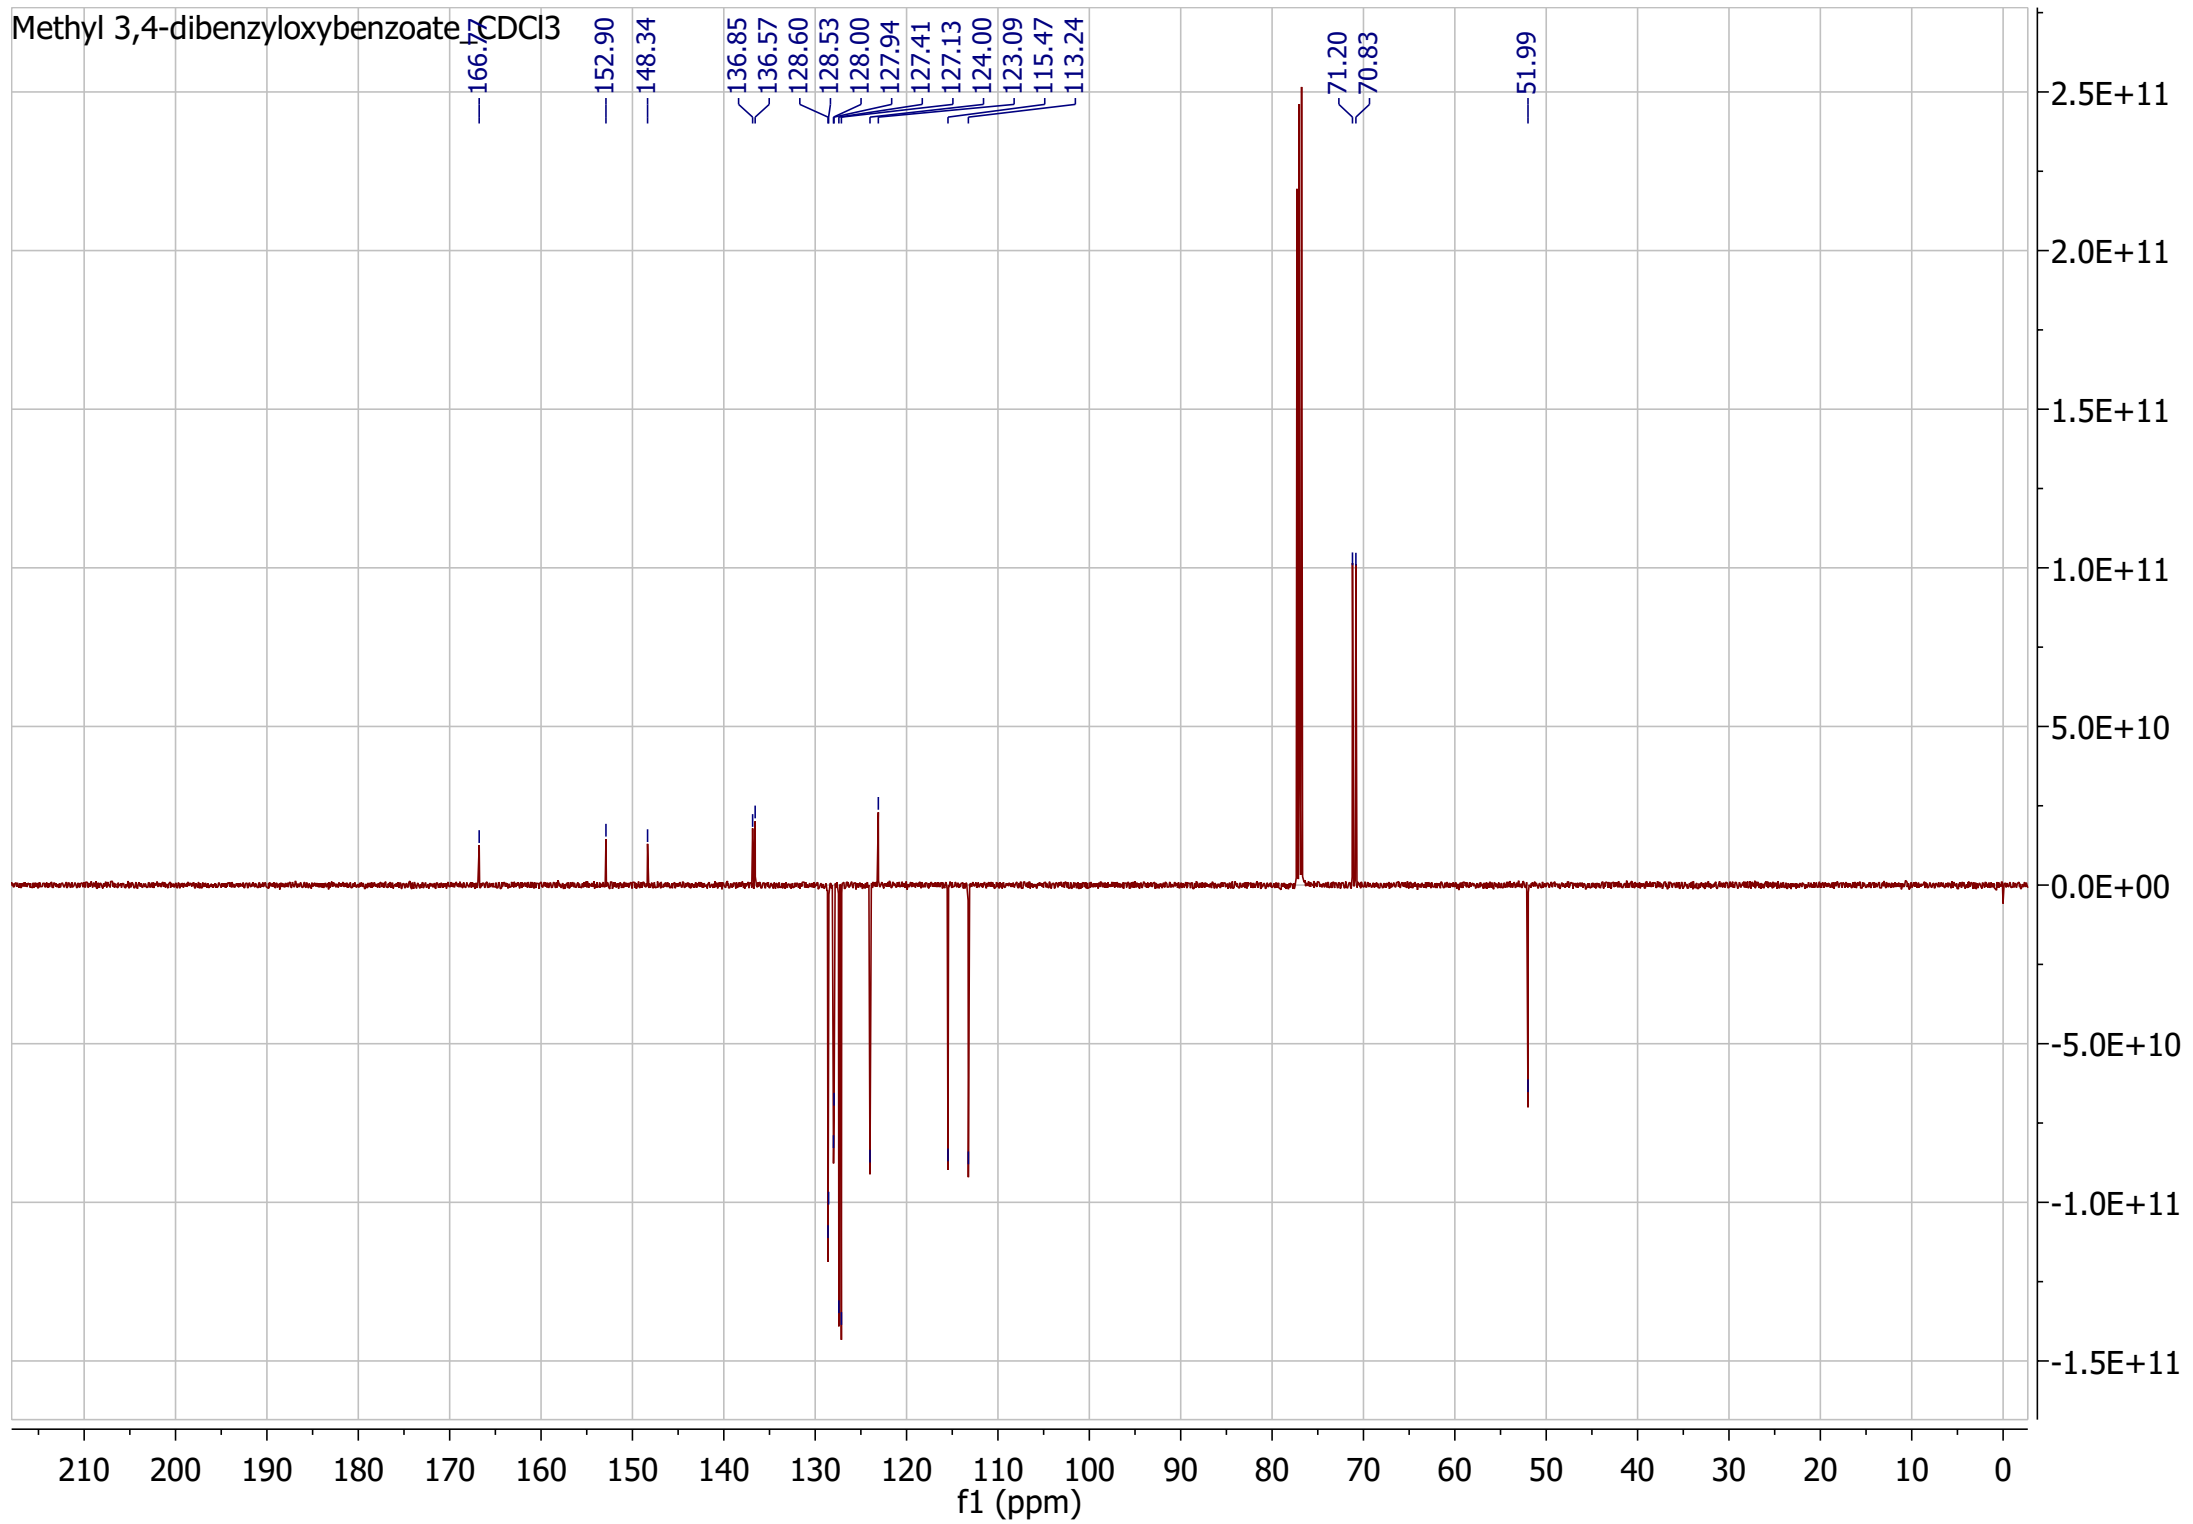

Methyl 3,5-dibenzyloxybenzoate\_CDCl3

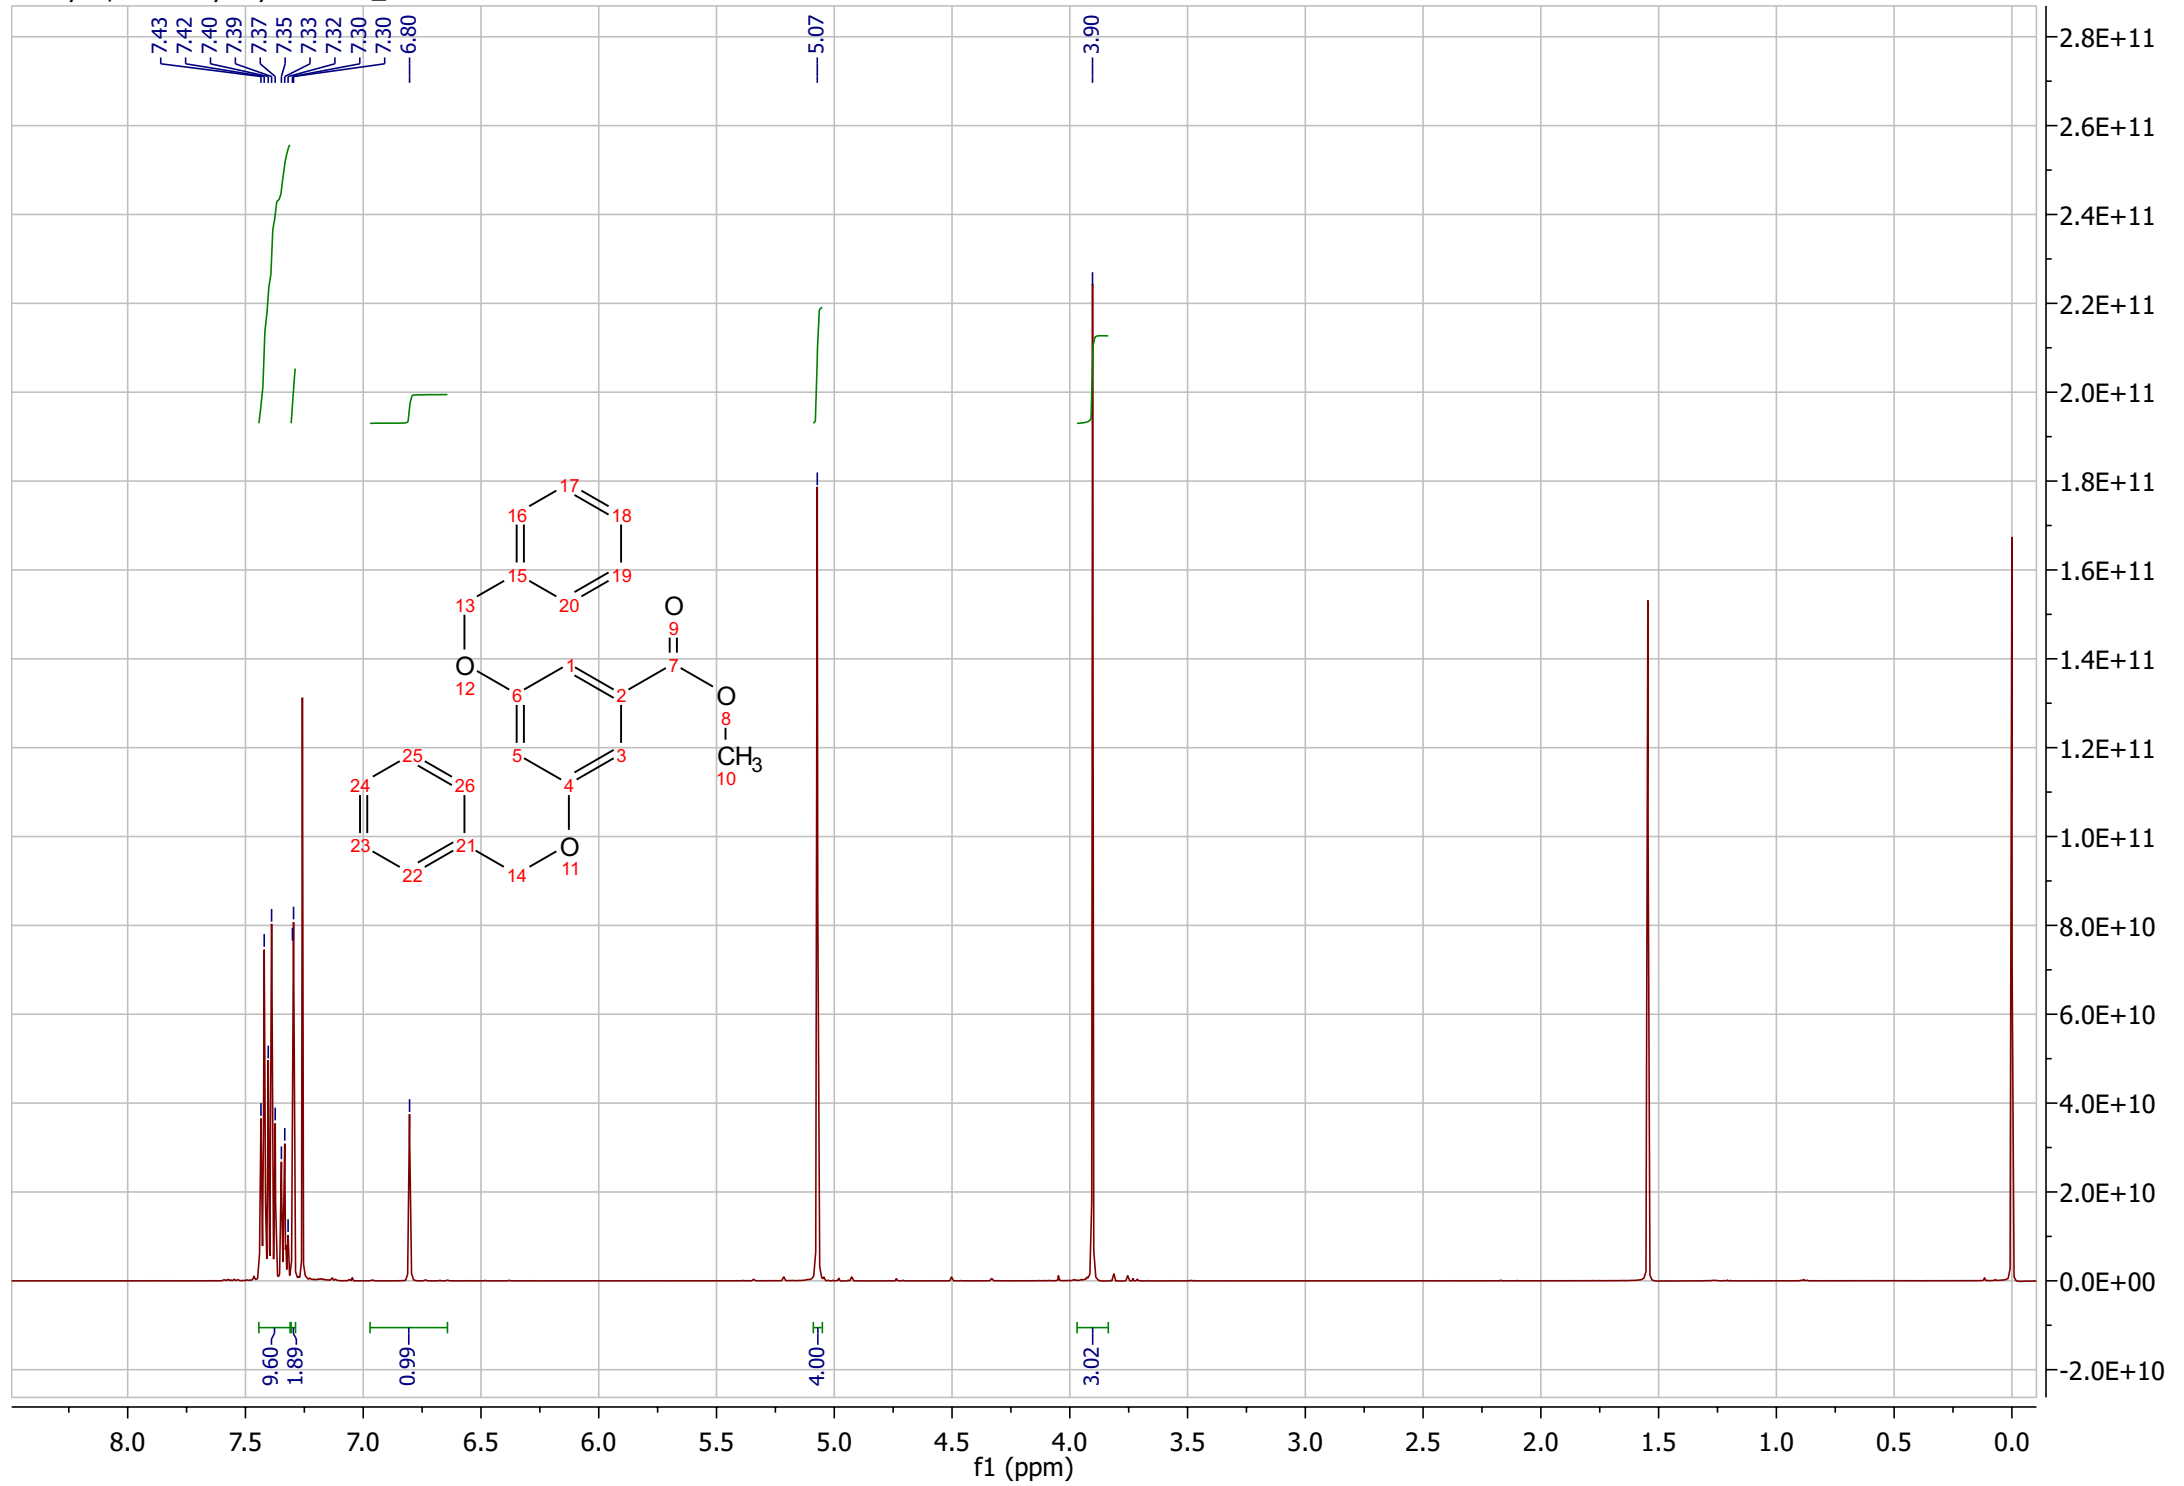

Methyl 3,5-dibenzyloxybenzoate\_CDCl3

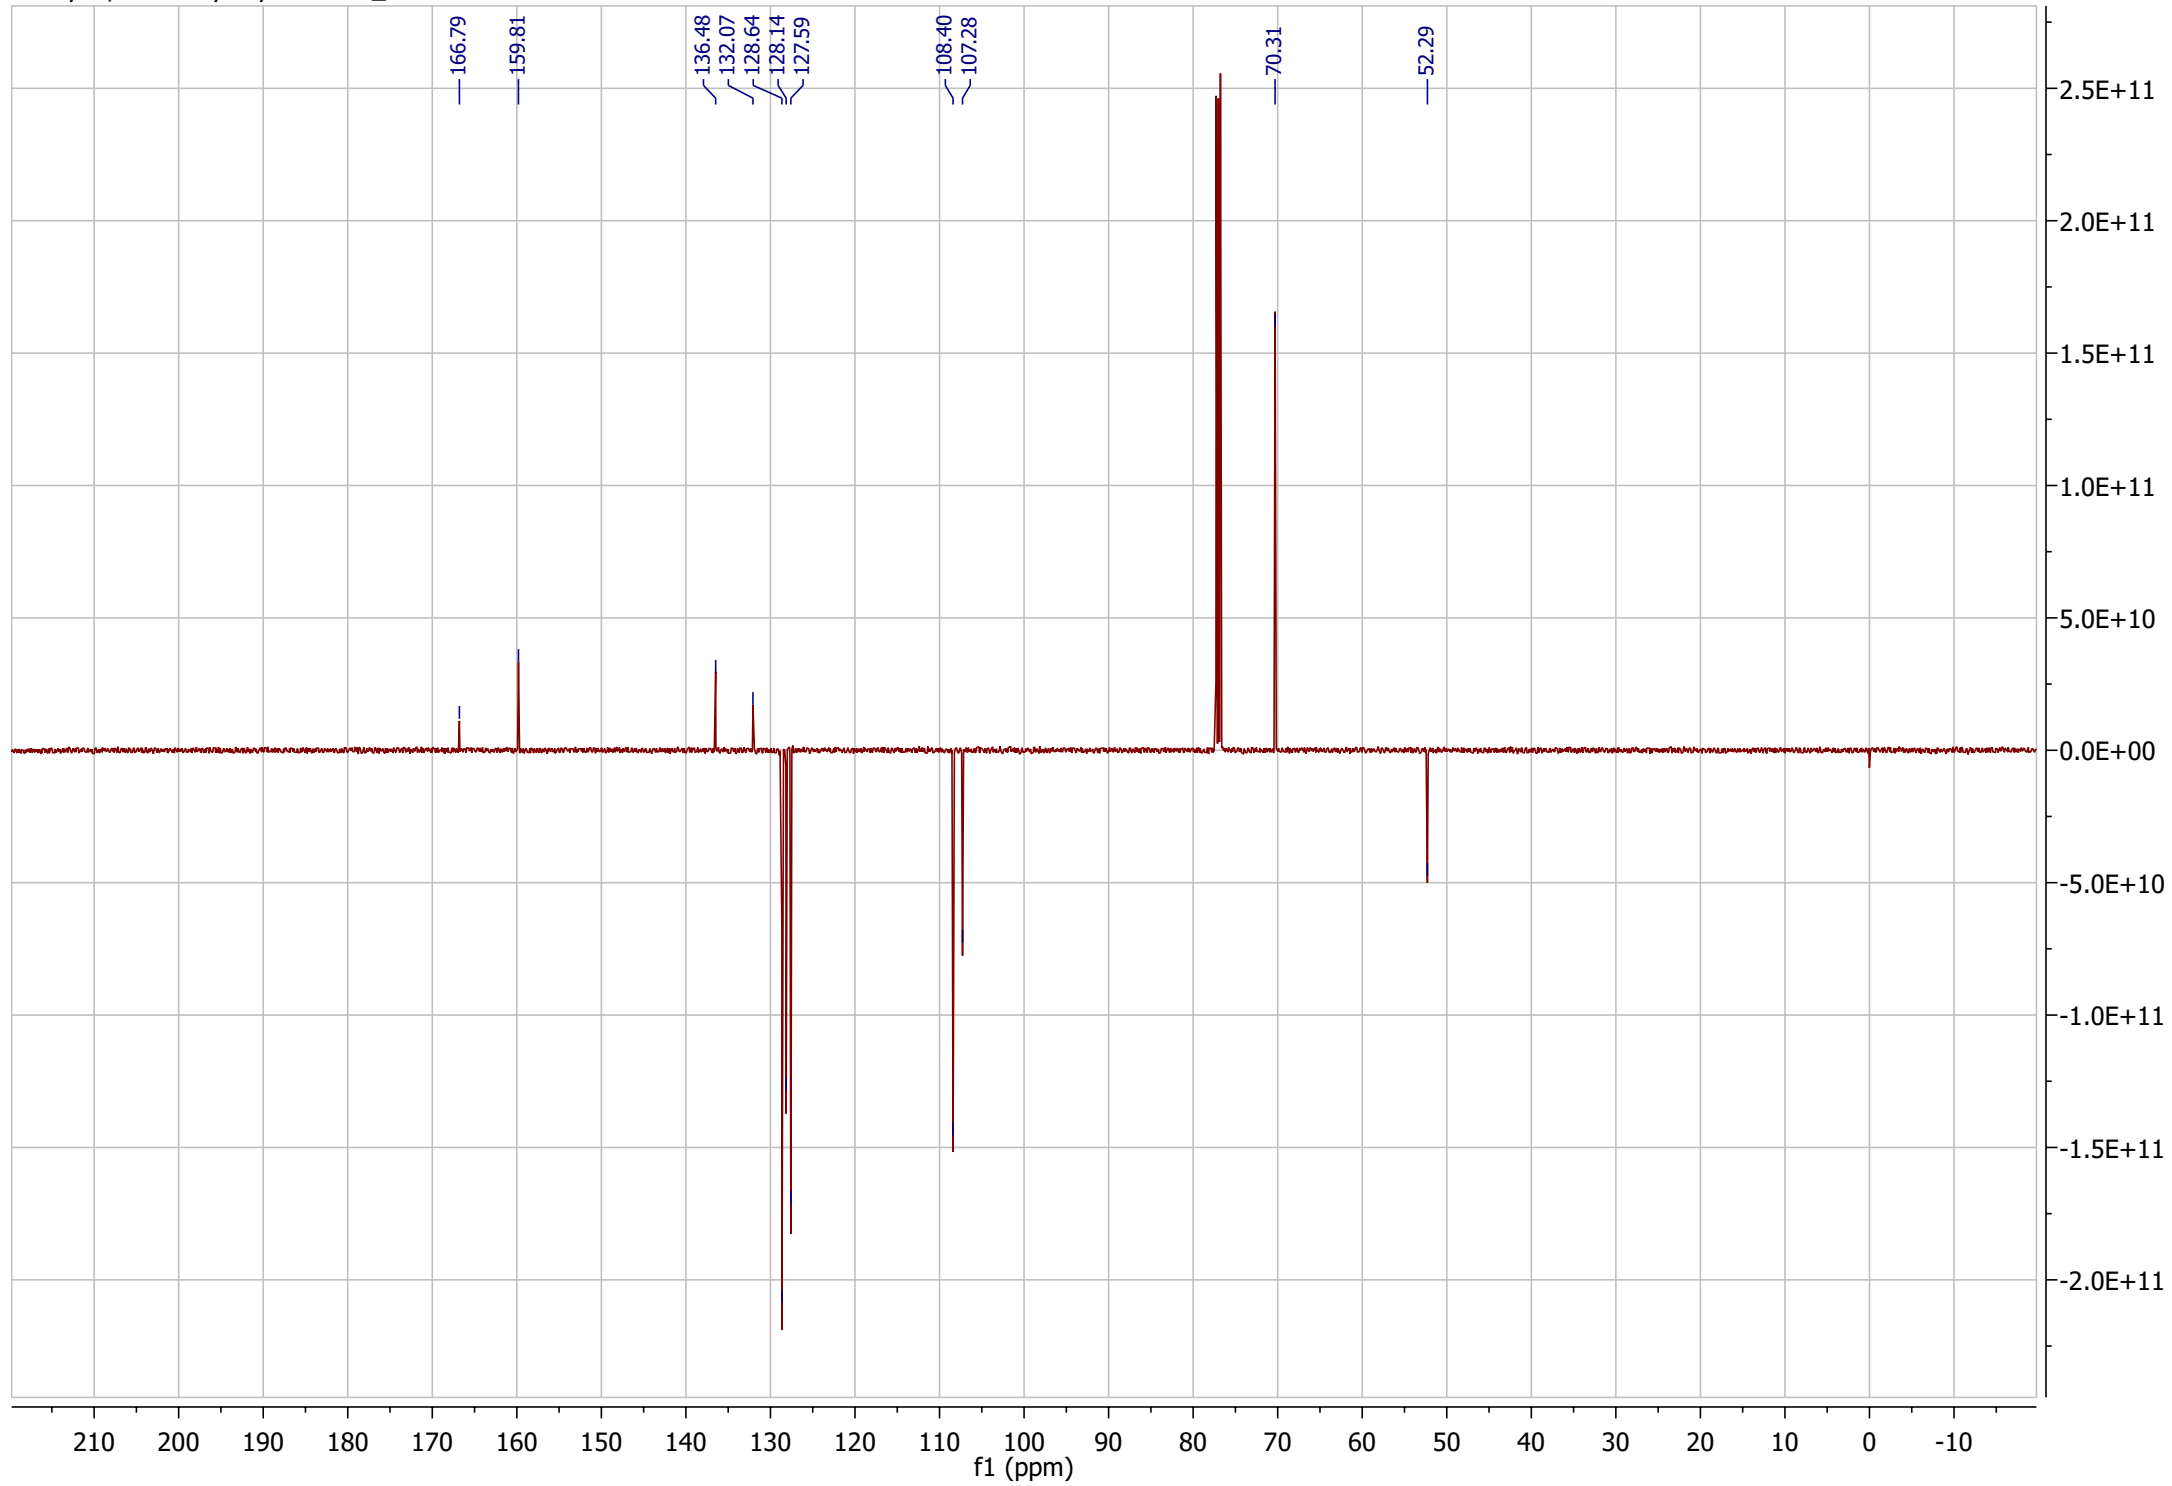

3,4,5-tribenzyloxybenzoic acid\_CDCl3

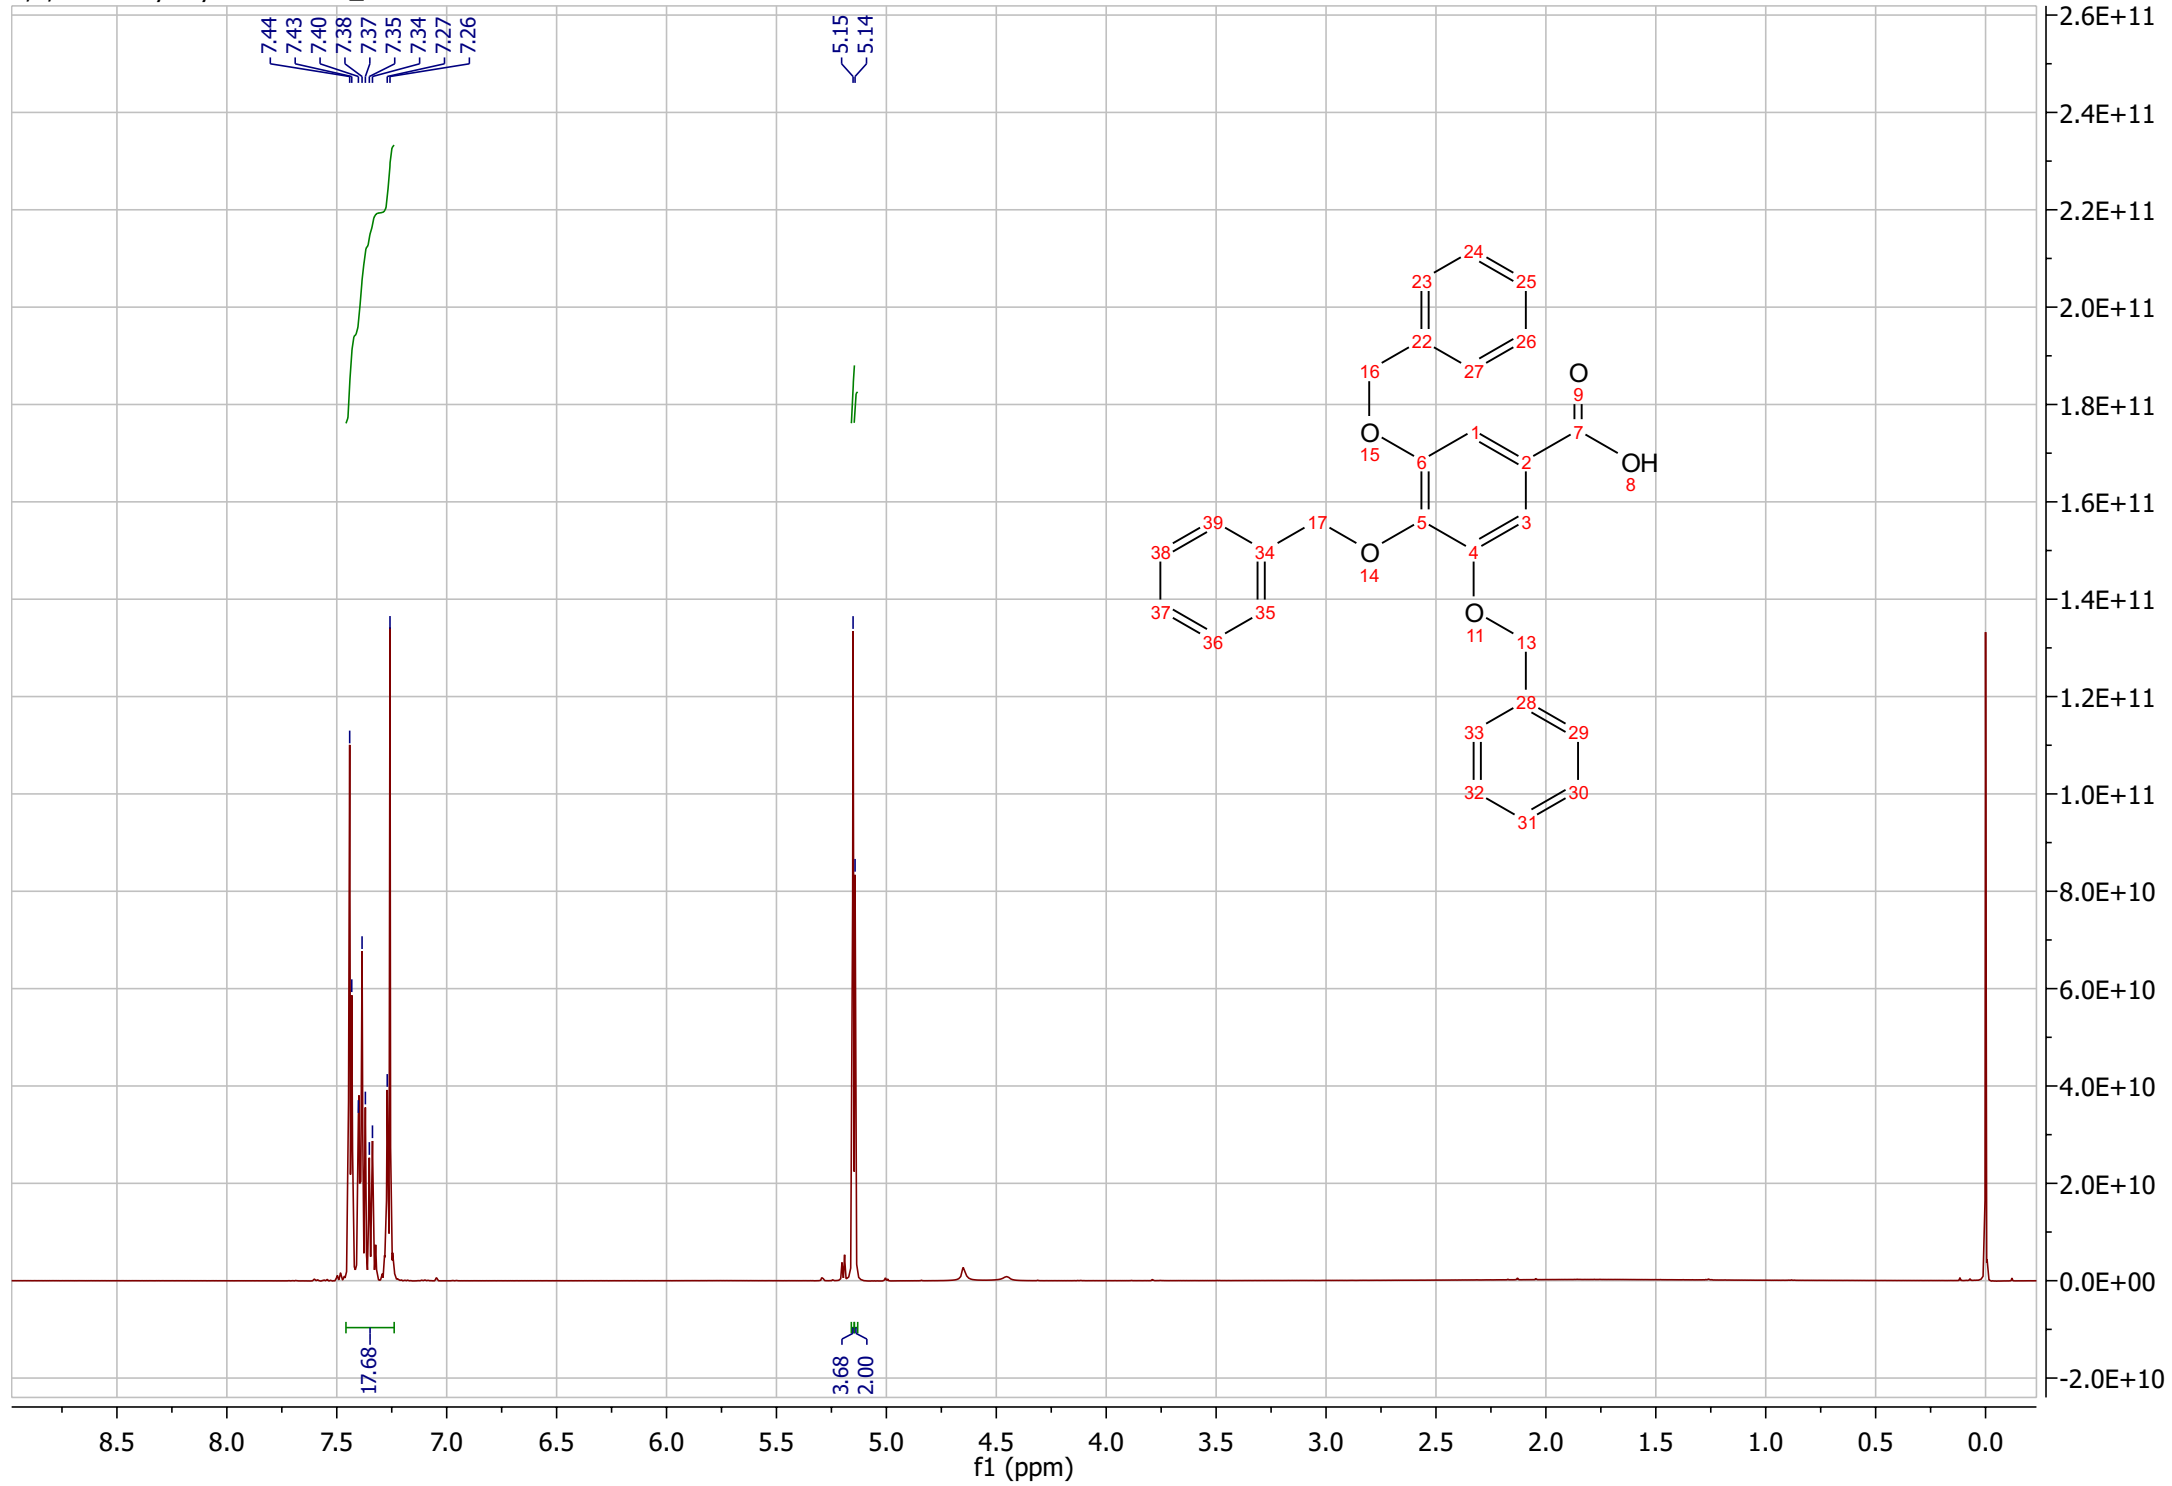

3,4,5-tribenzyloxybenzoic acid\_CDCl3

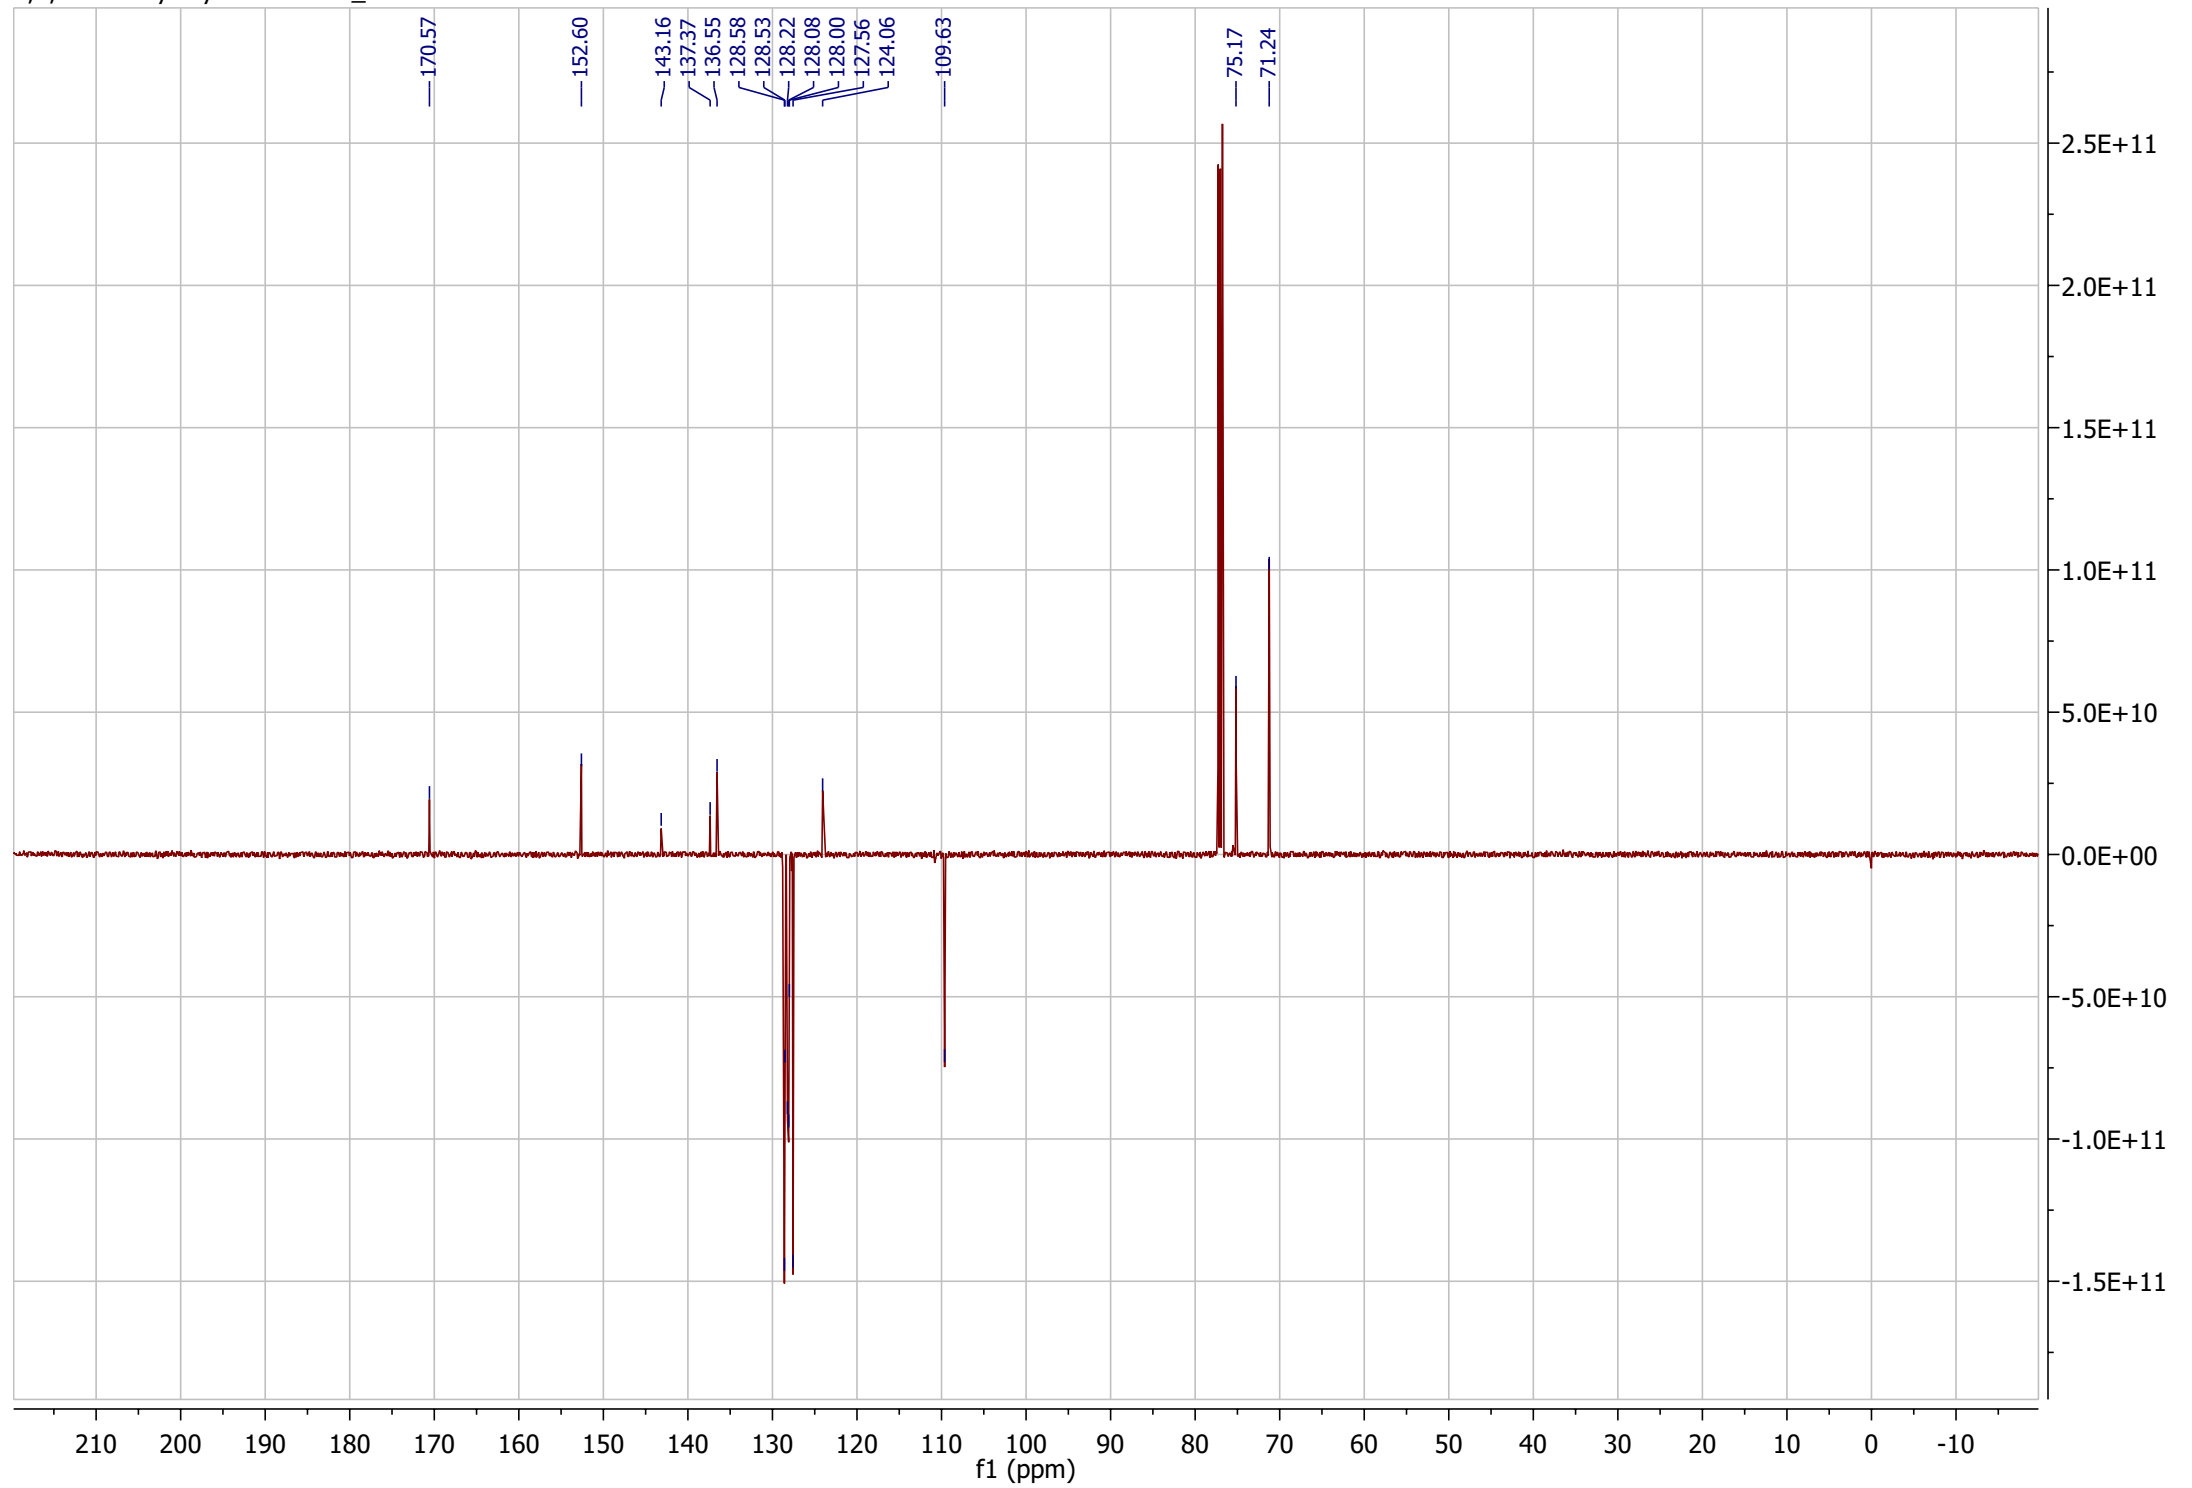

3,5-Dibenzoyloxybenzoic acid\_DMSO

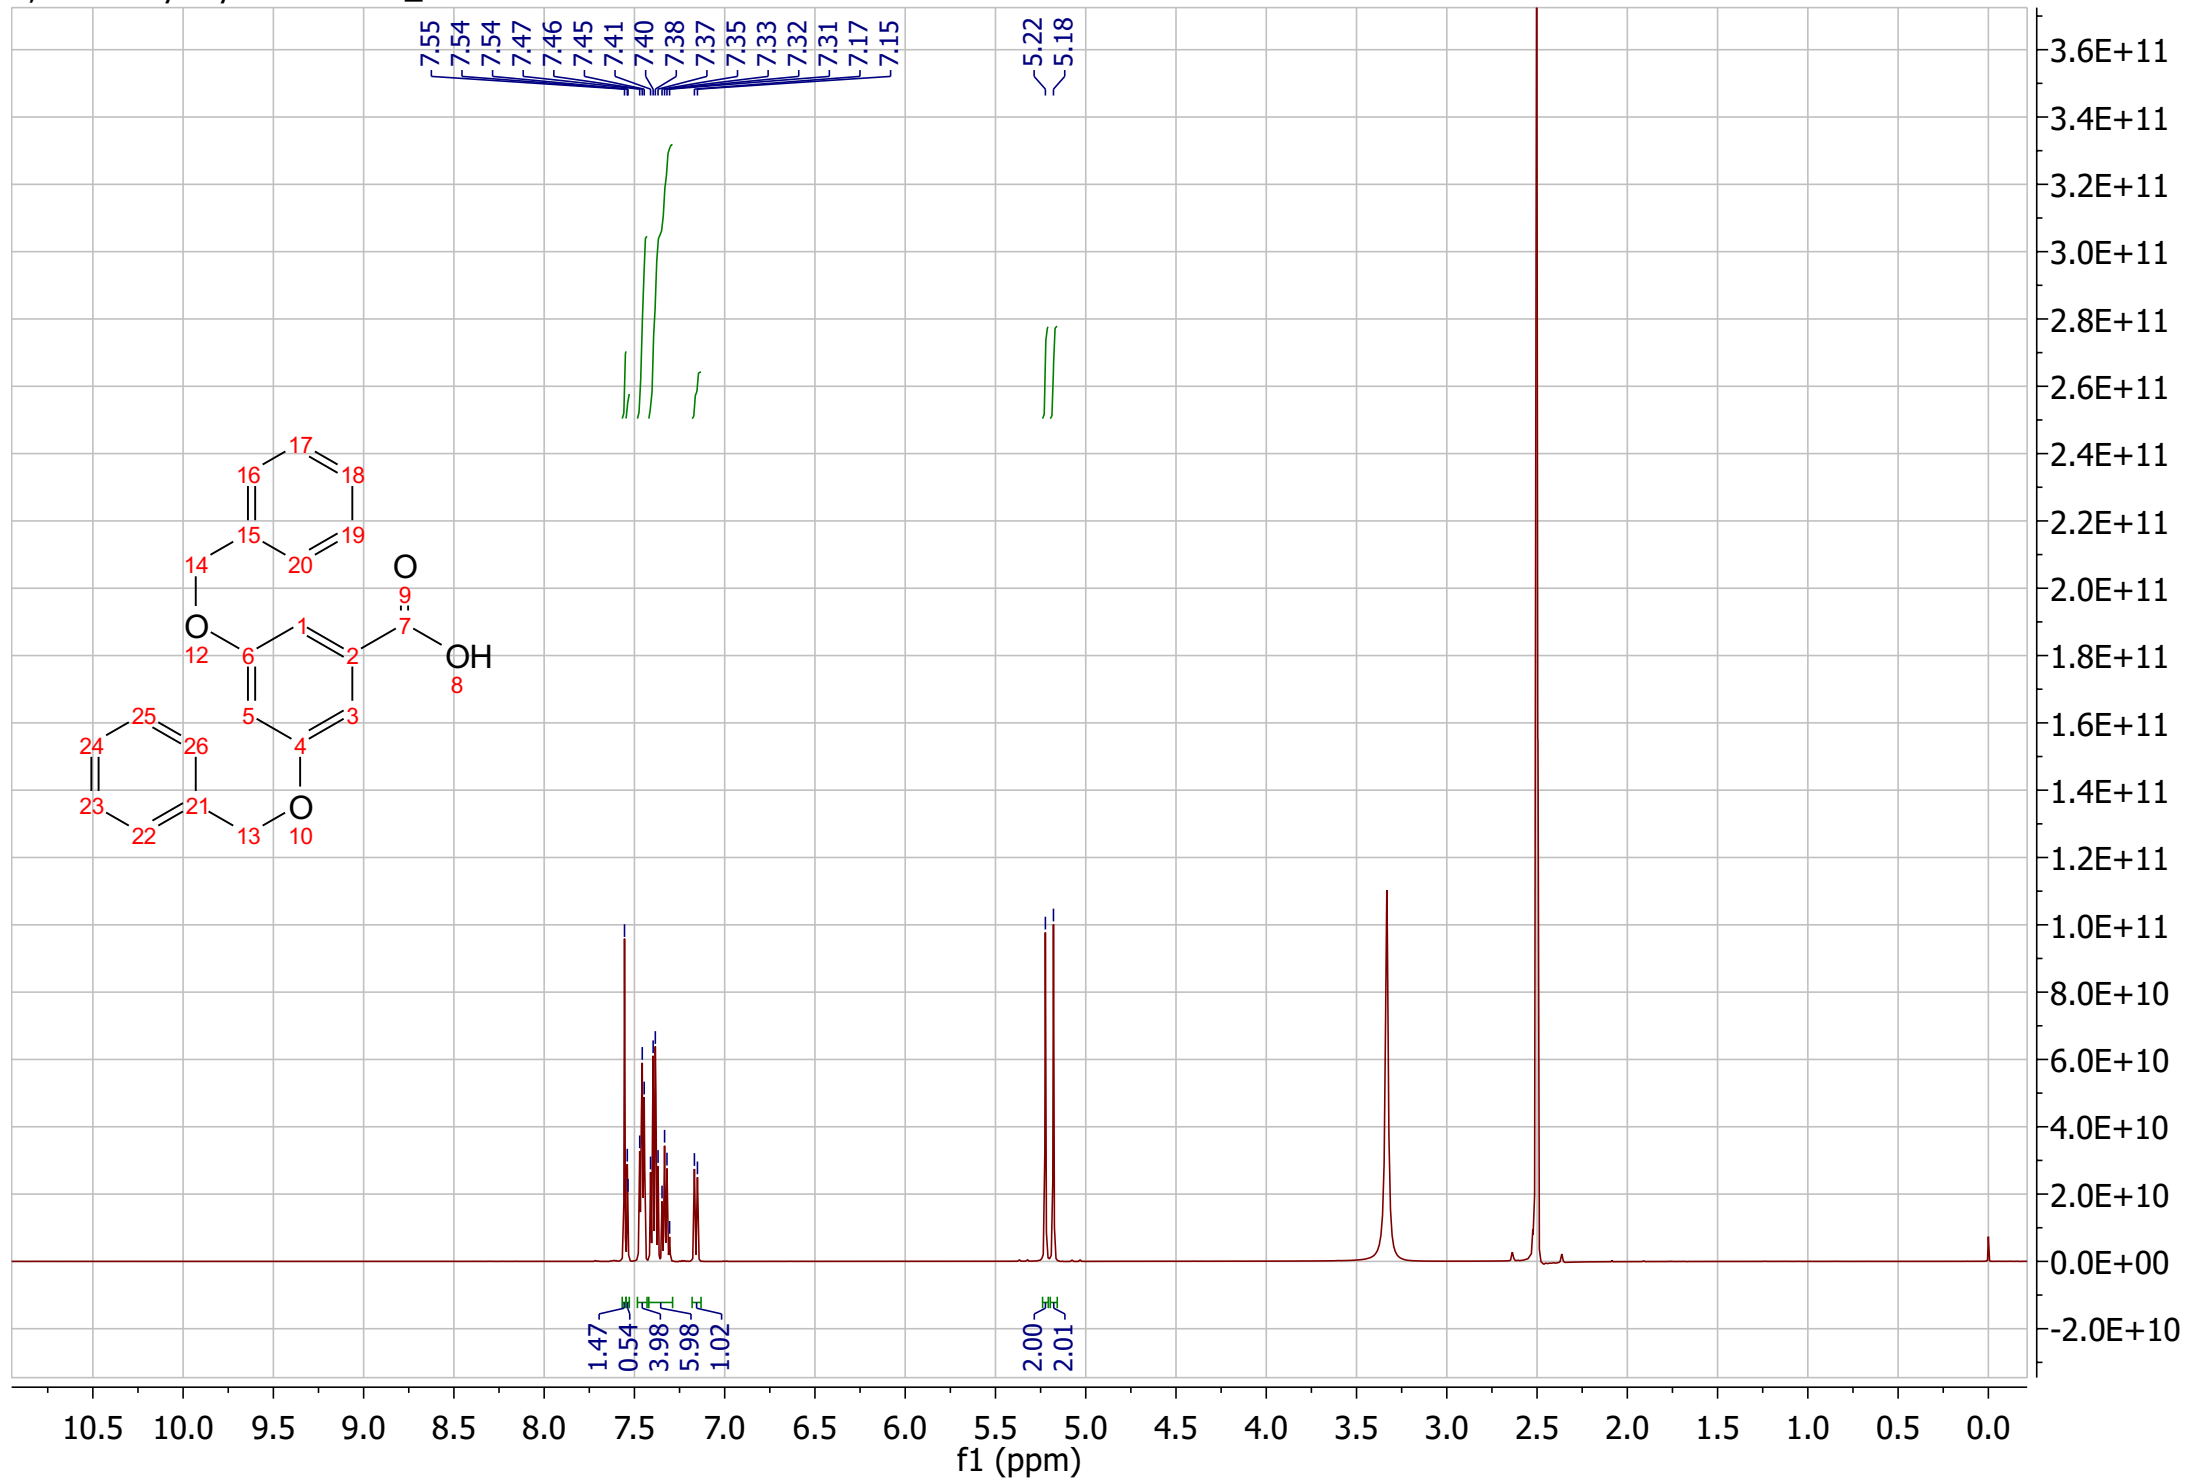



3,5-Dibenzyloxybenzoic acid\_DMSO

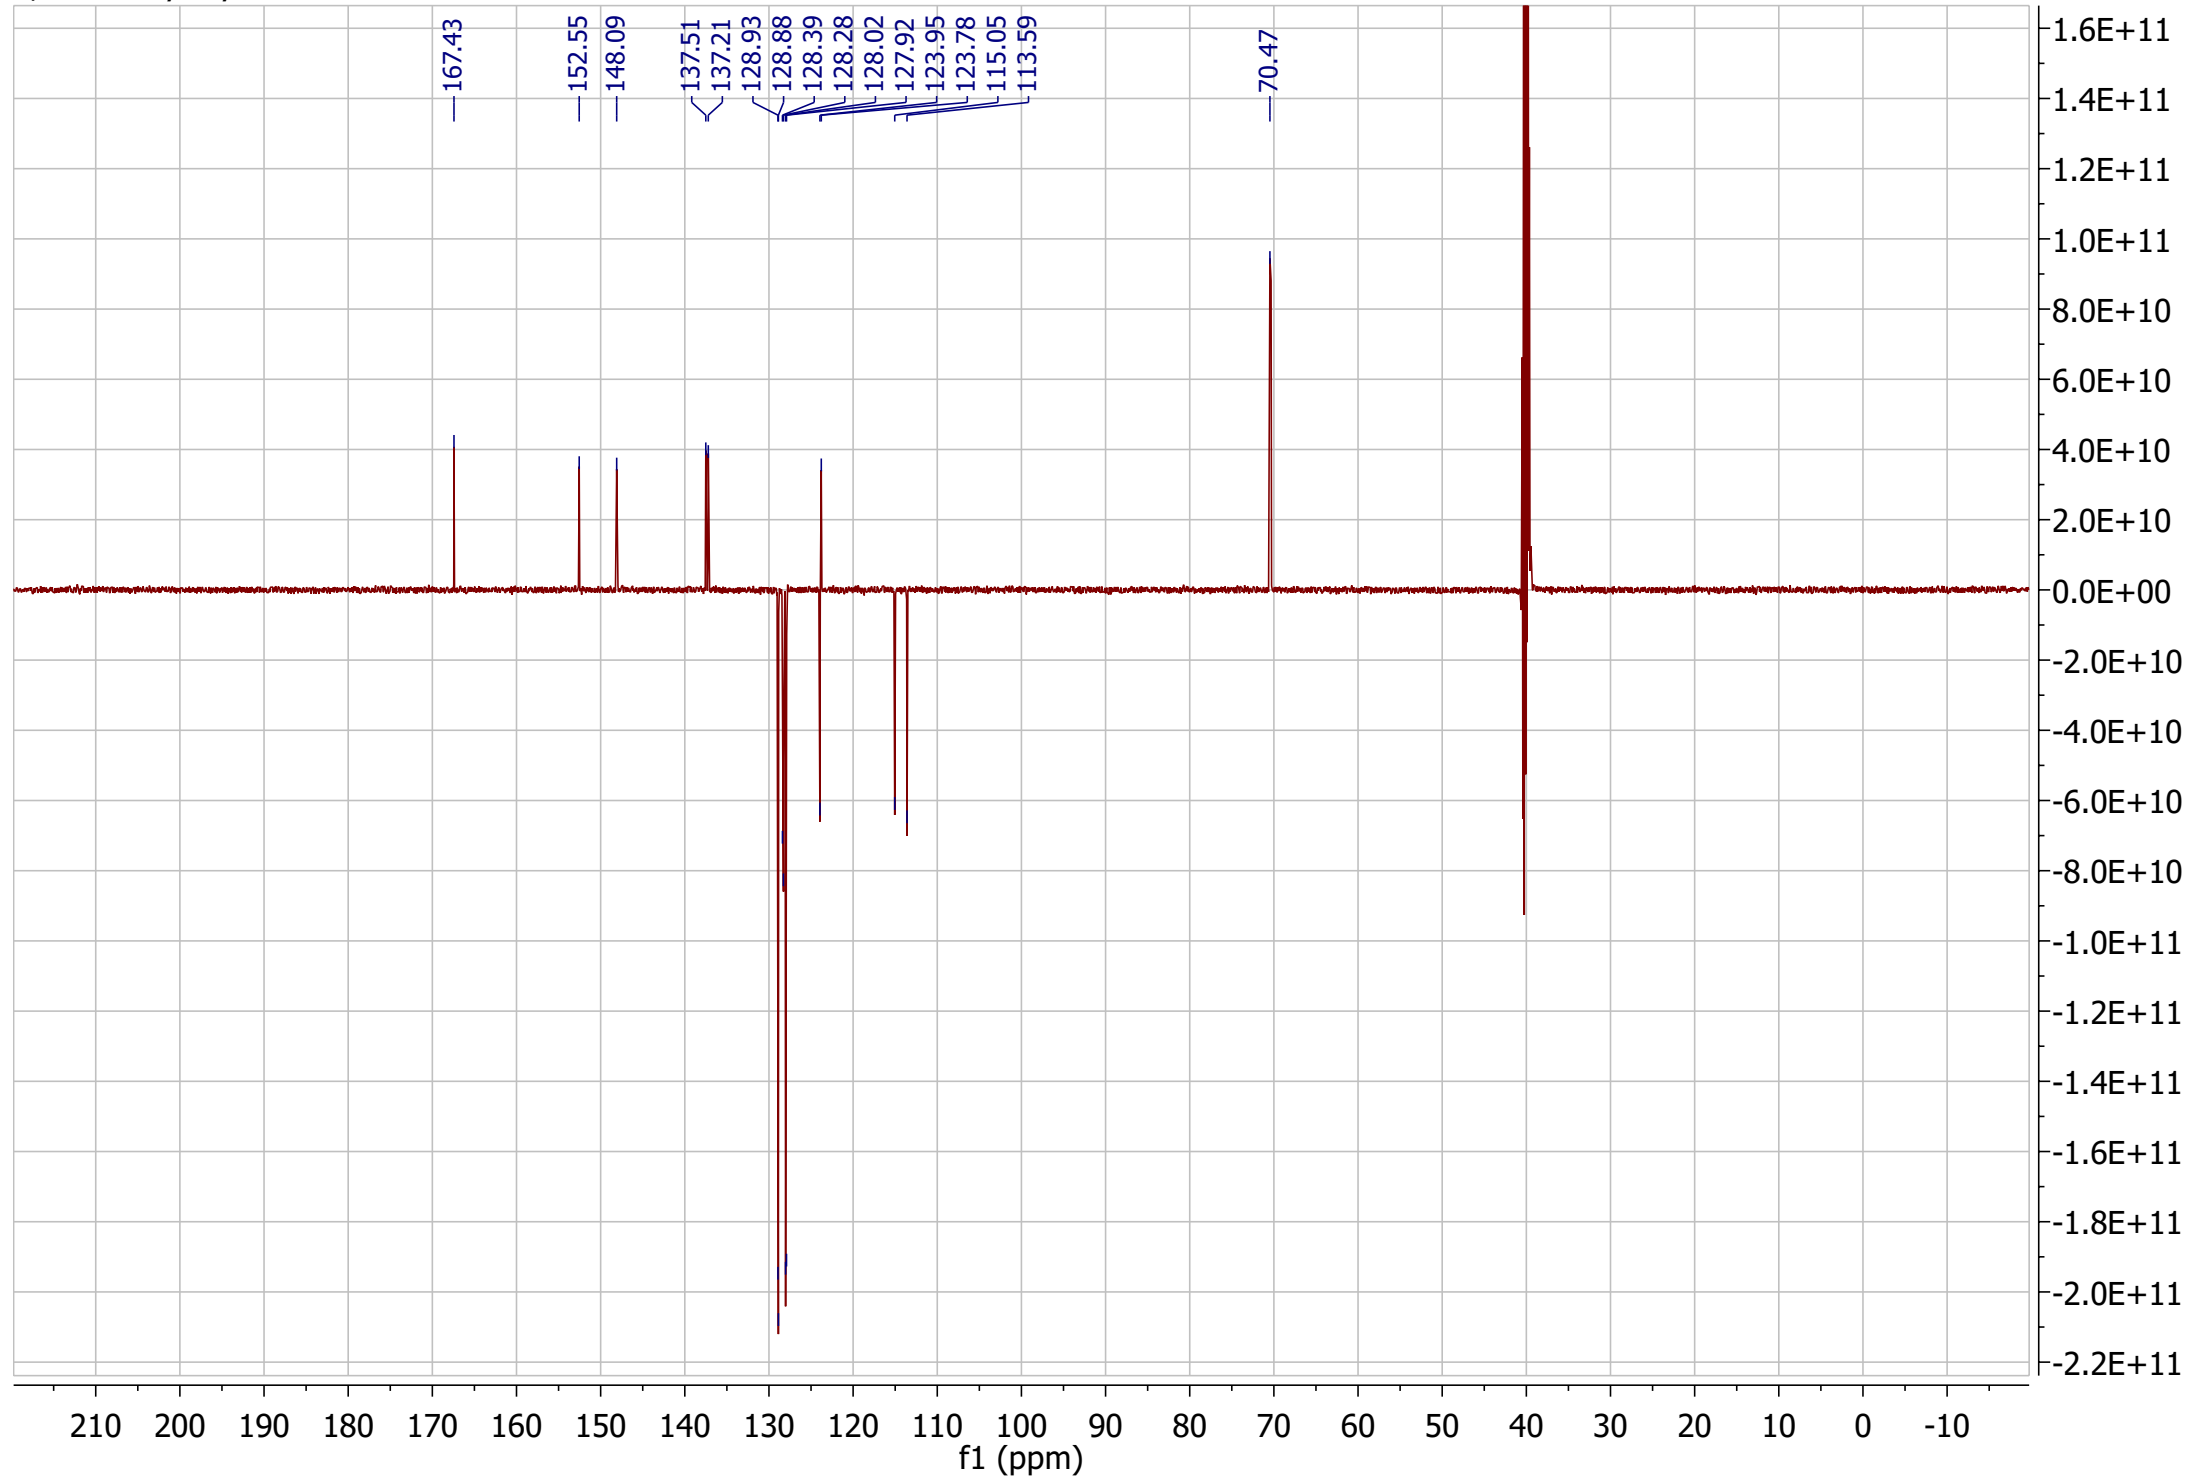

3,5-Dibenzoyloxybenzoic acid\_DMSO

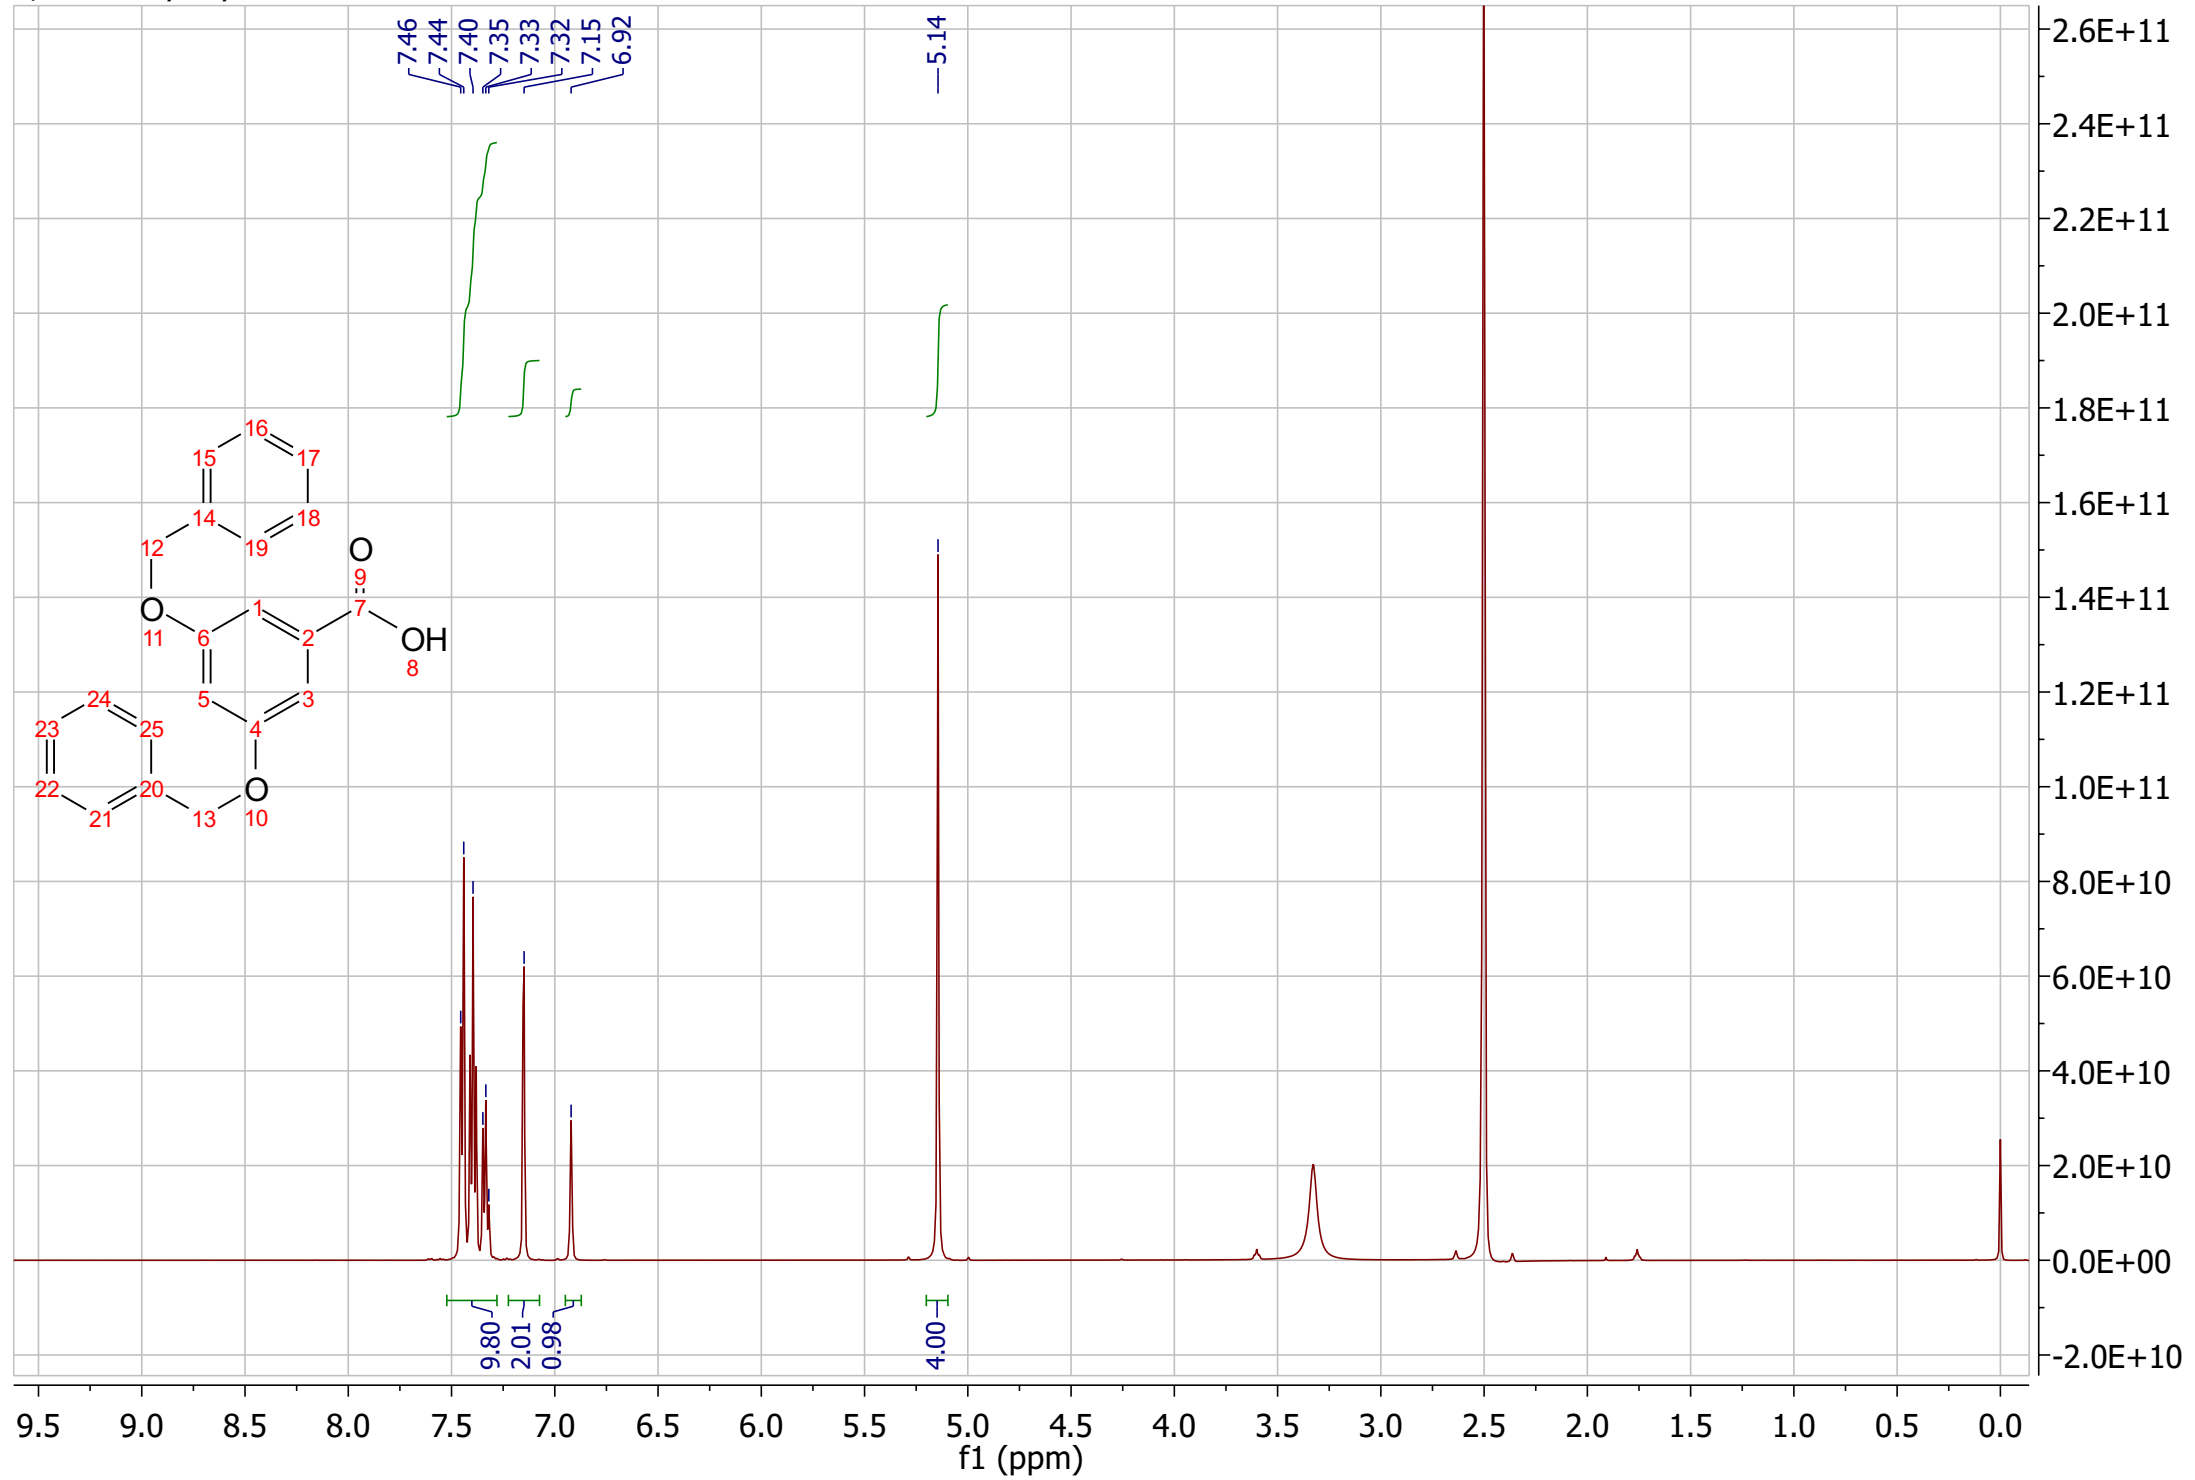

3,5-Dibenzyloxybenzoic acid\_DMSO

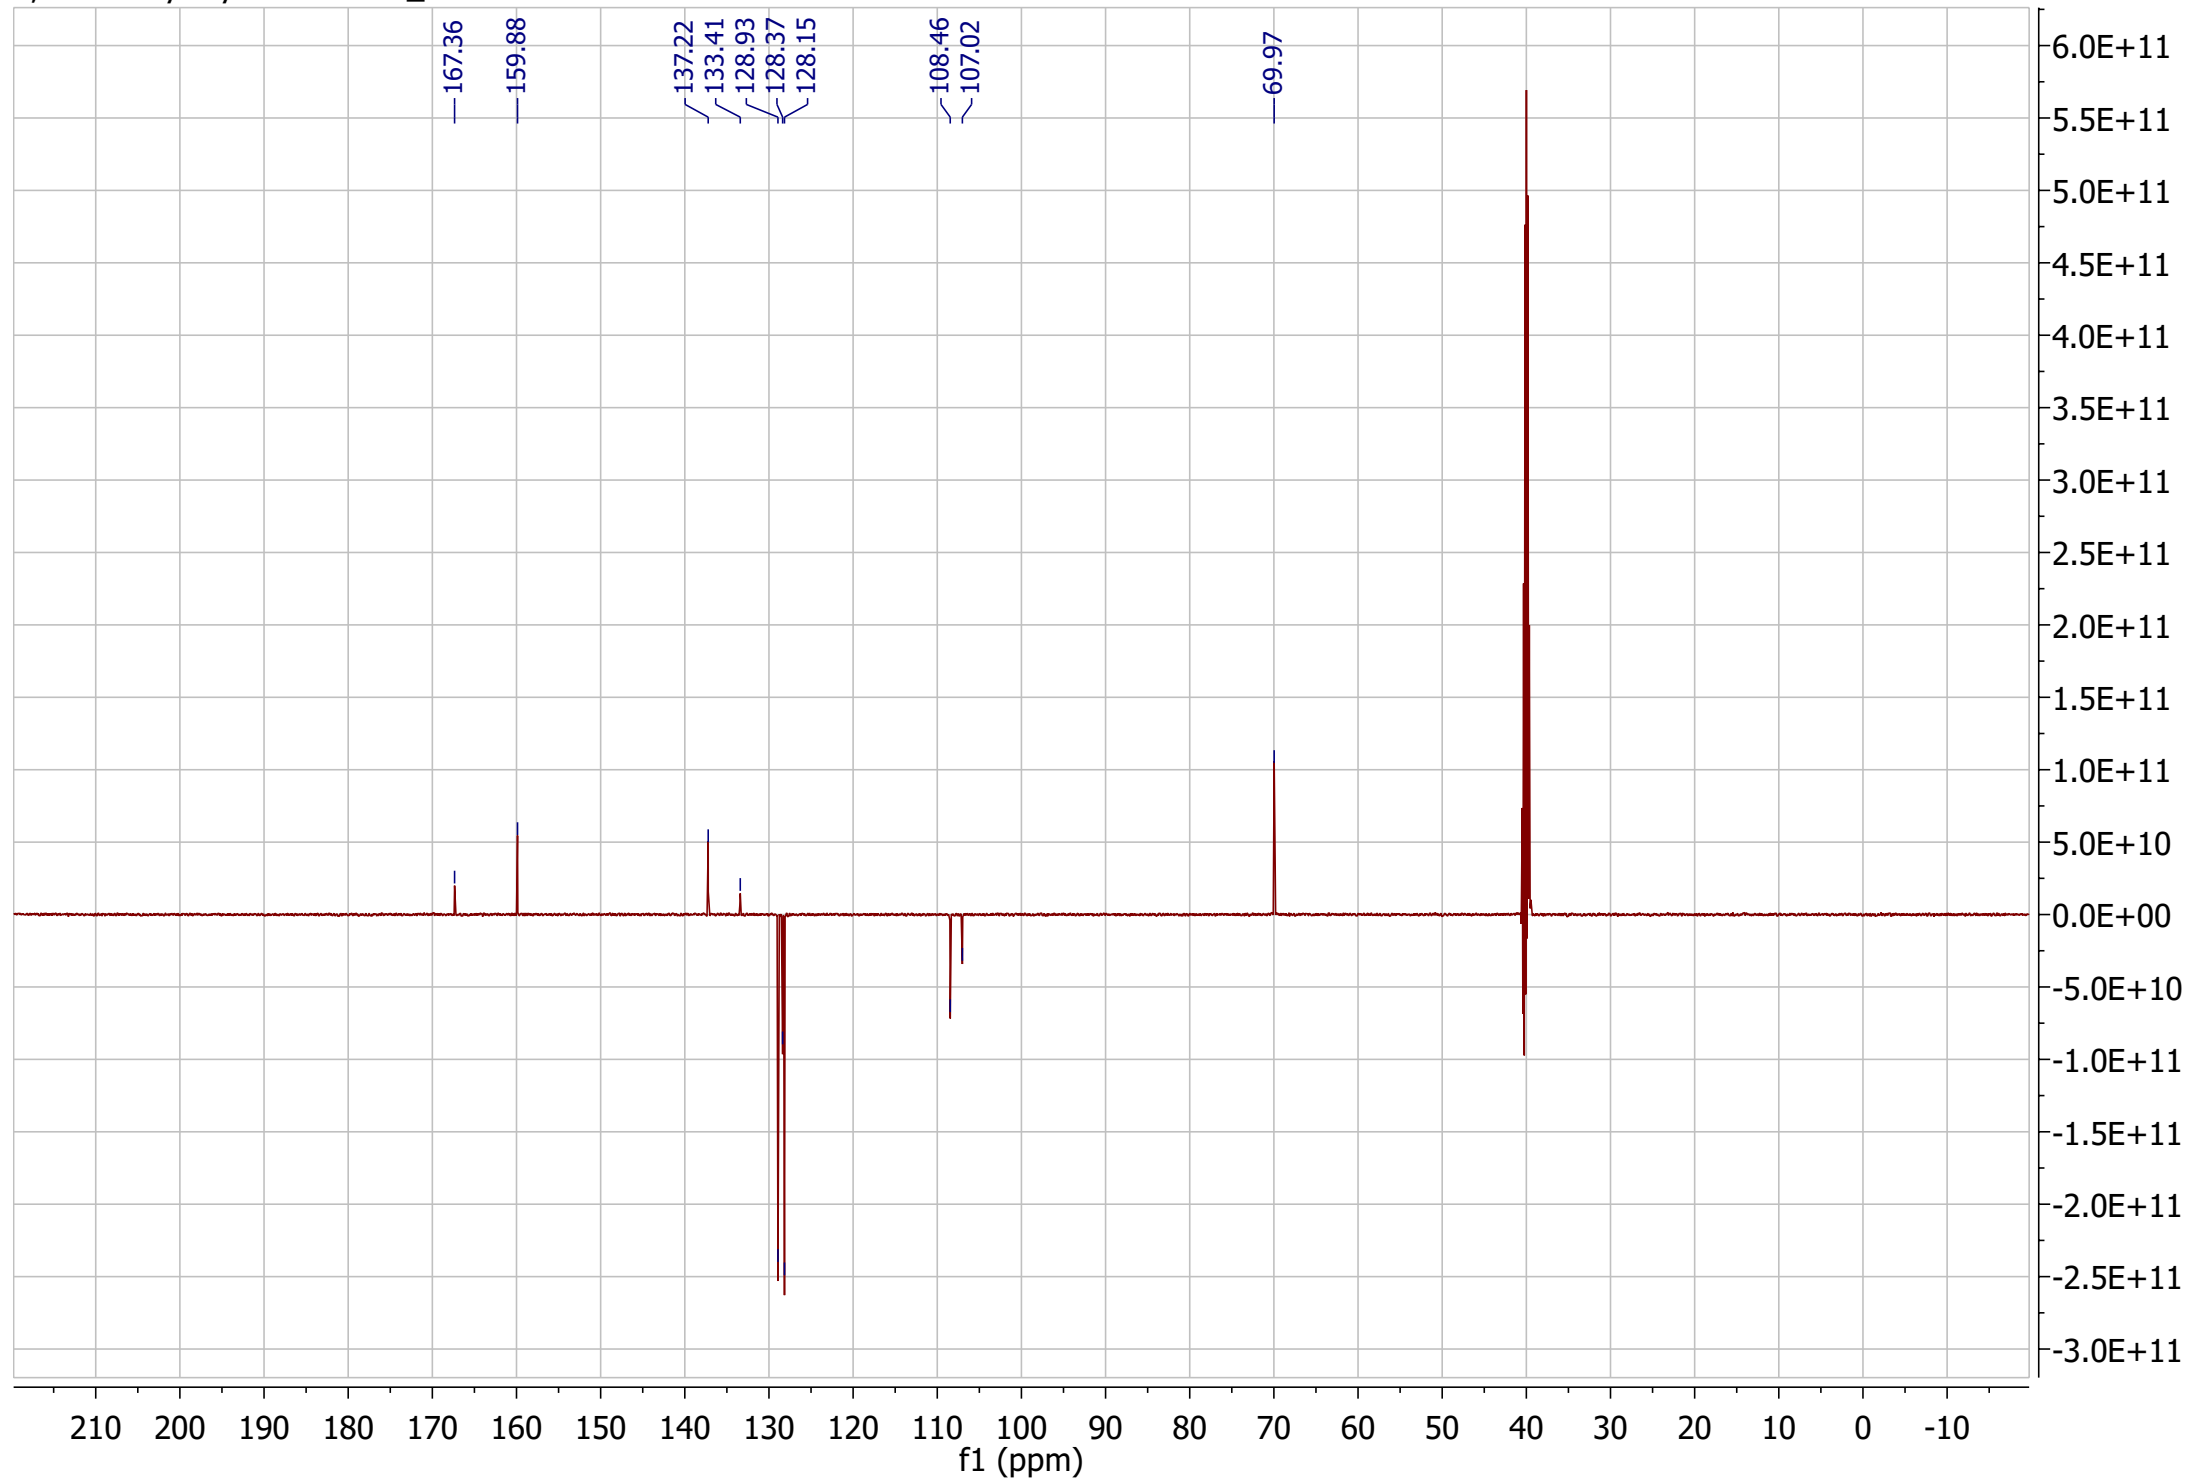

2-hydroxyethyl 3,4,5-tris(benzyloxy)benzoate\_DMSO

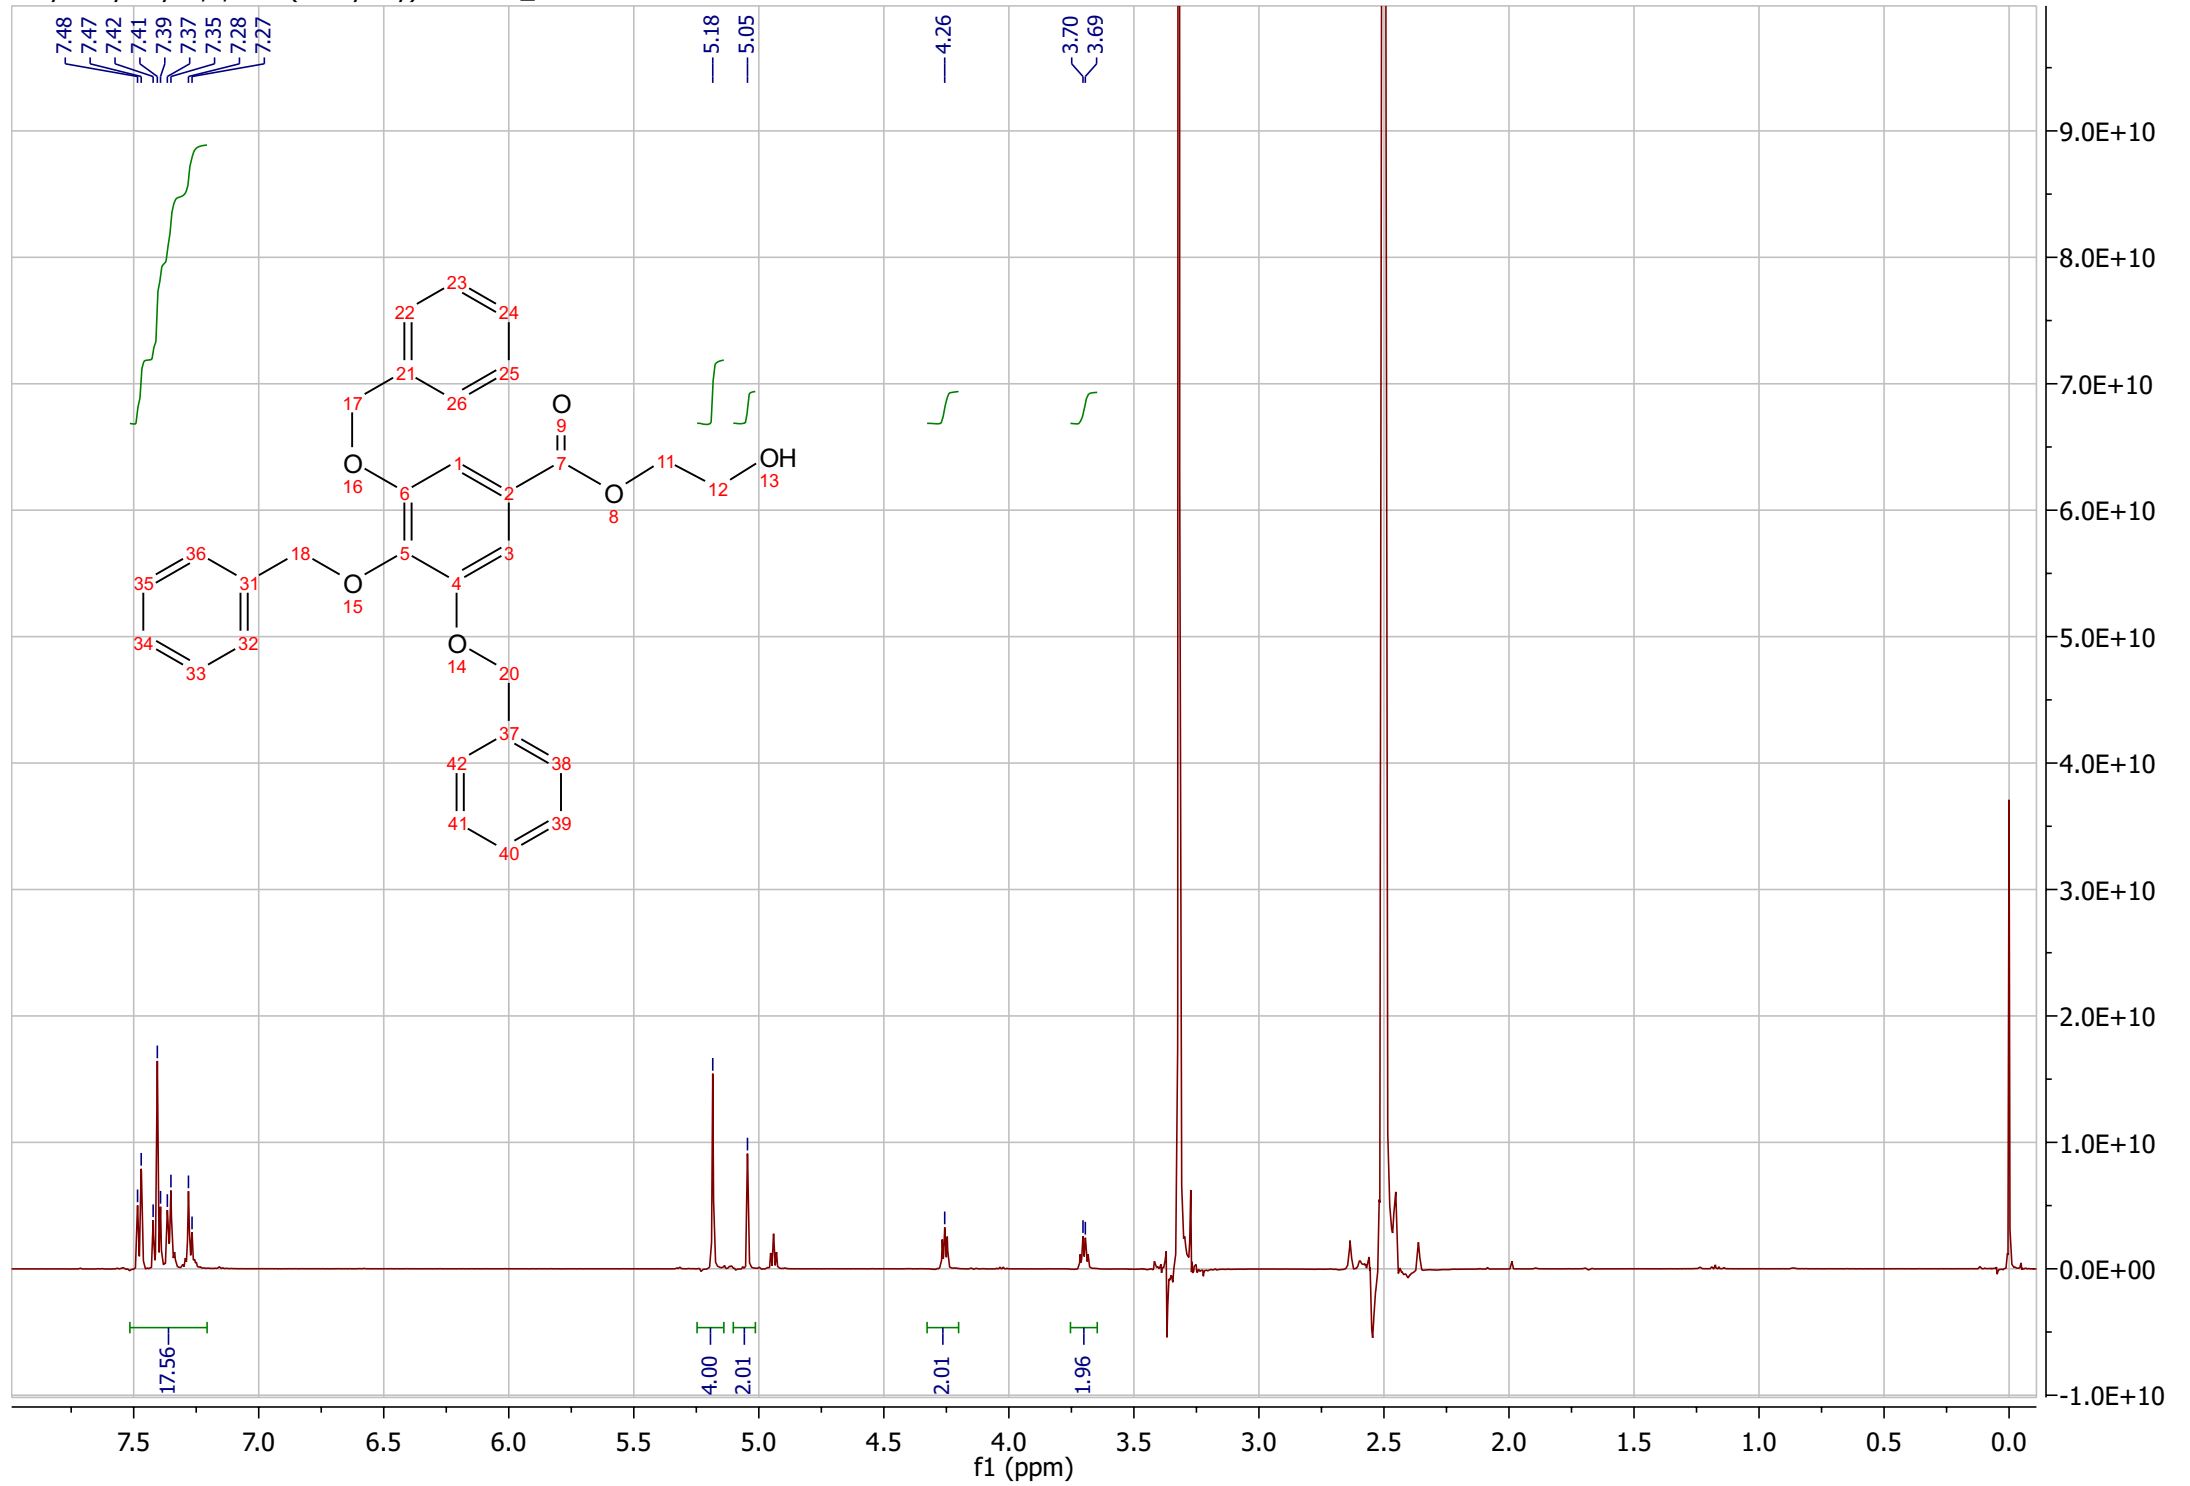

2-hydroxyethyl 3,4,5-tris(benzyloxy)benzoate\_DMSO

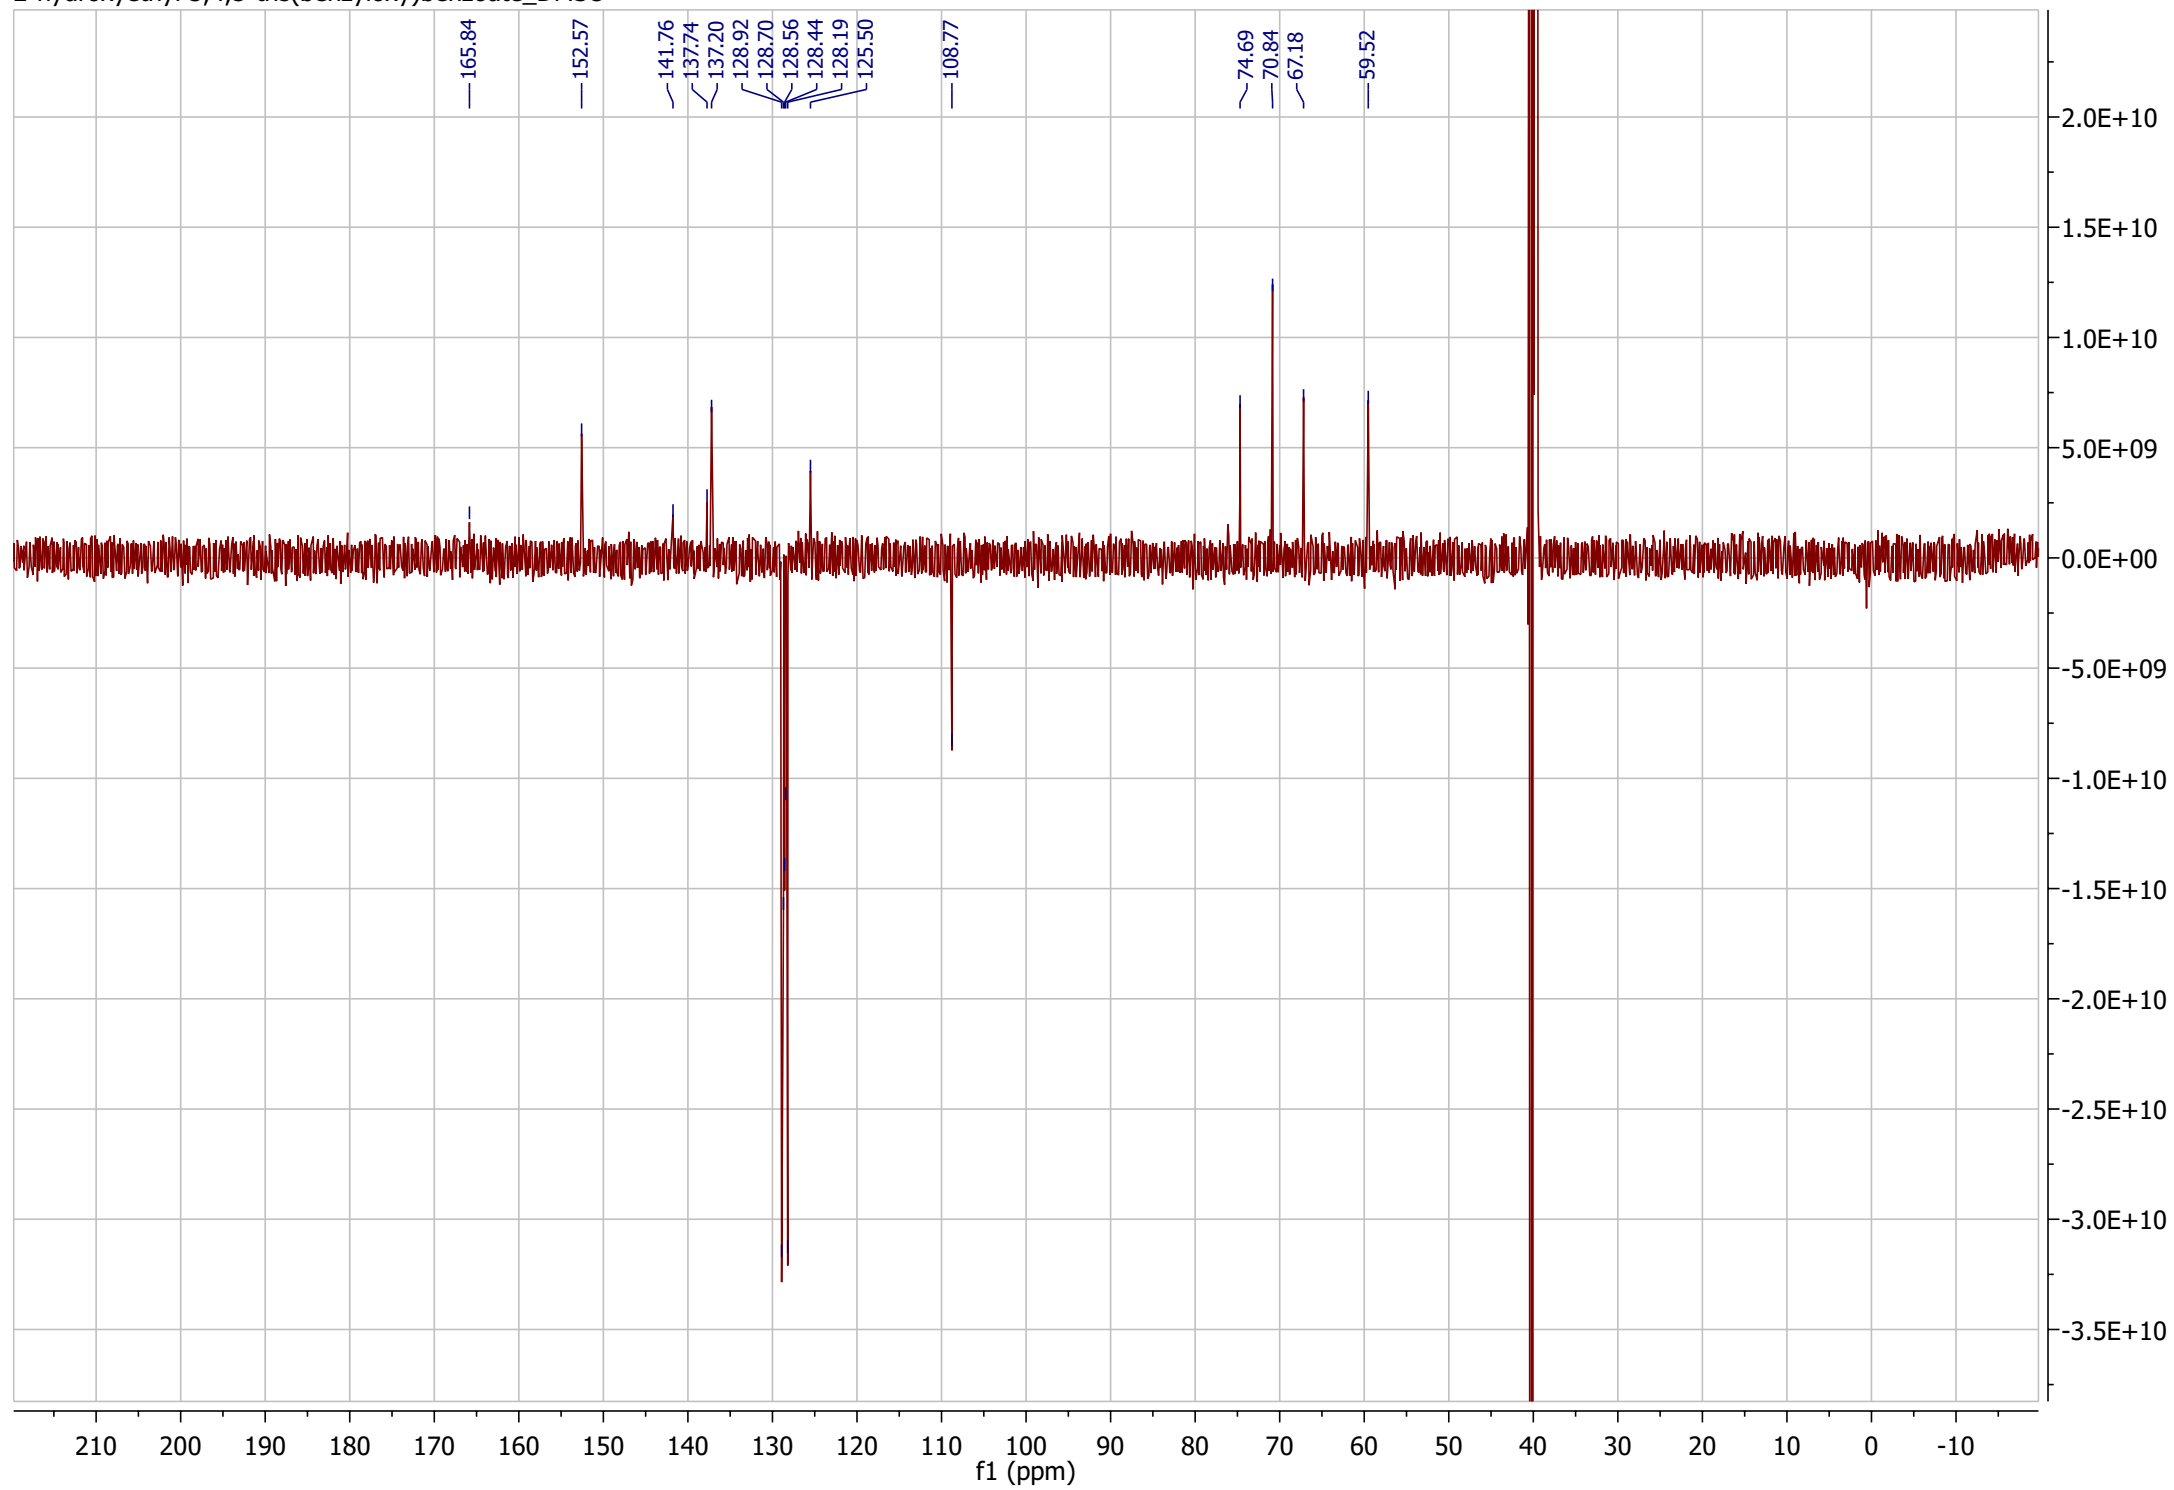

3-hydroxypropyl 3,4,5-tris(benzyloxy)benzoate\_DMSO

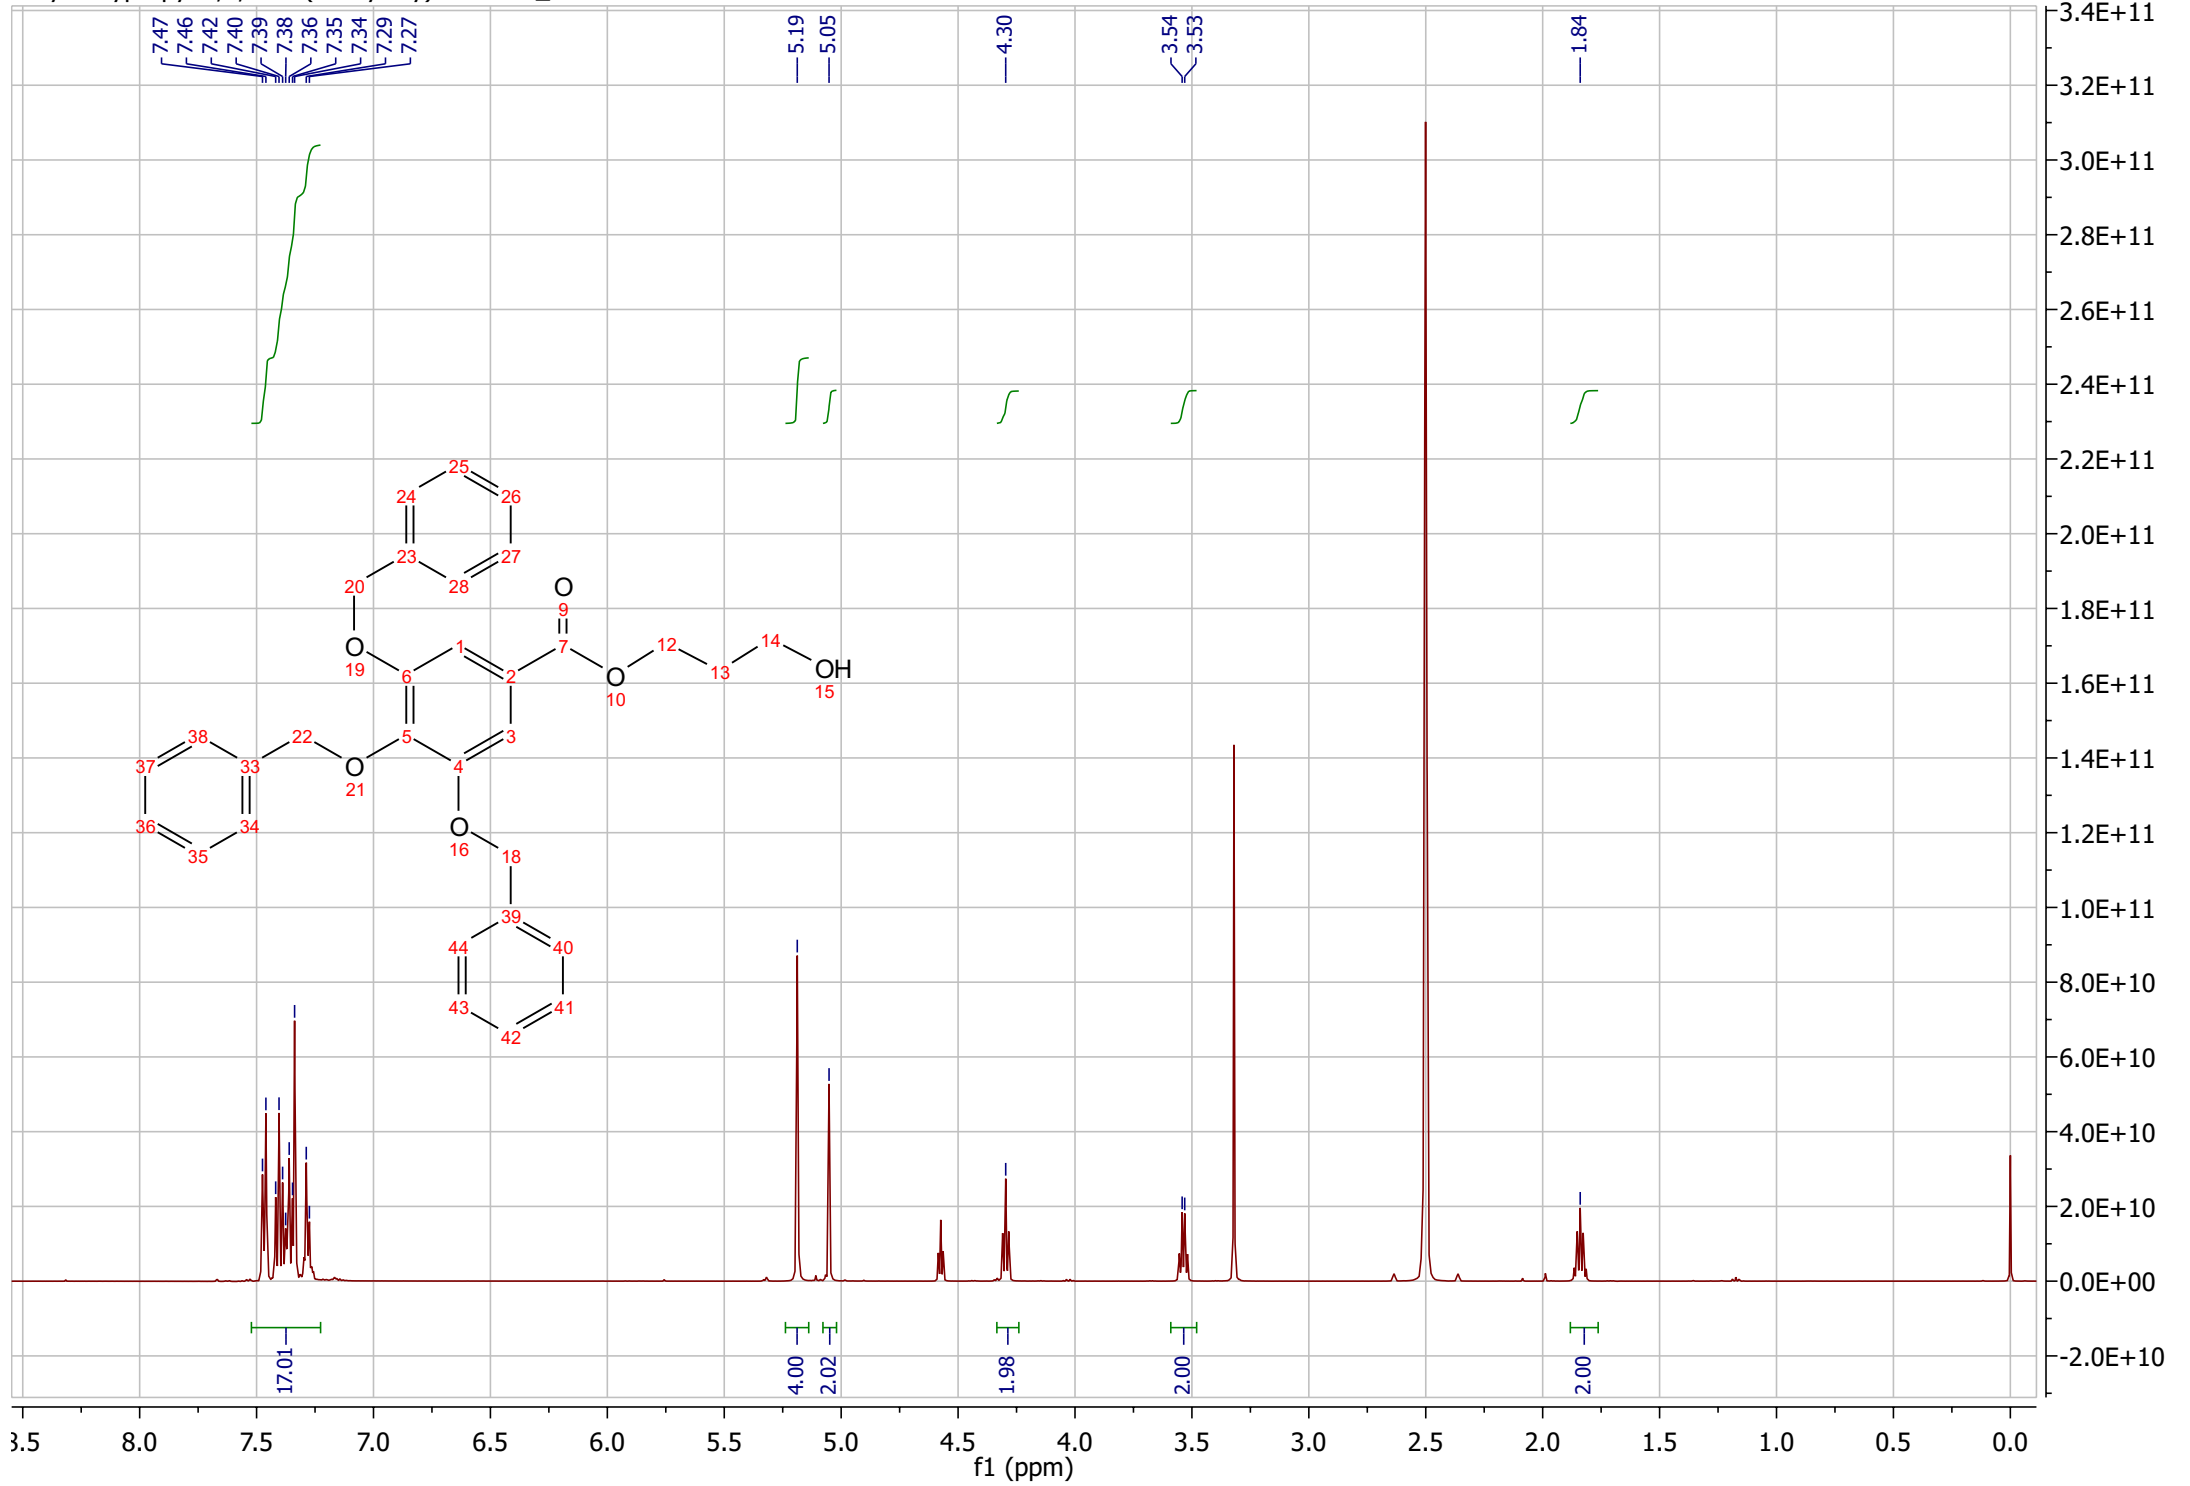

3-hydroxypropyl 3,4,5-tris(benzyloxy)benzoate\_DMSO

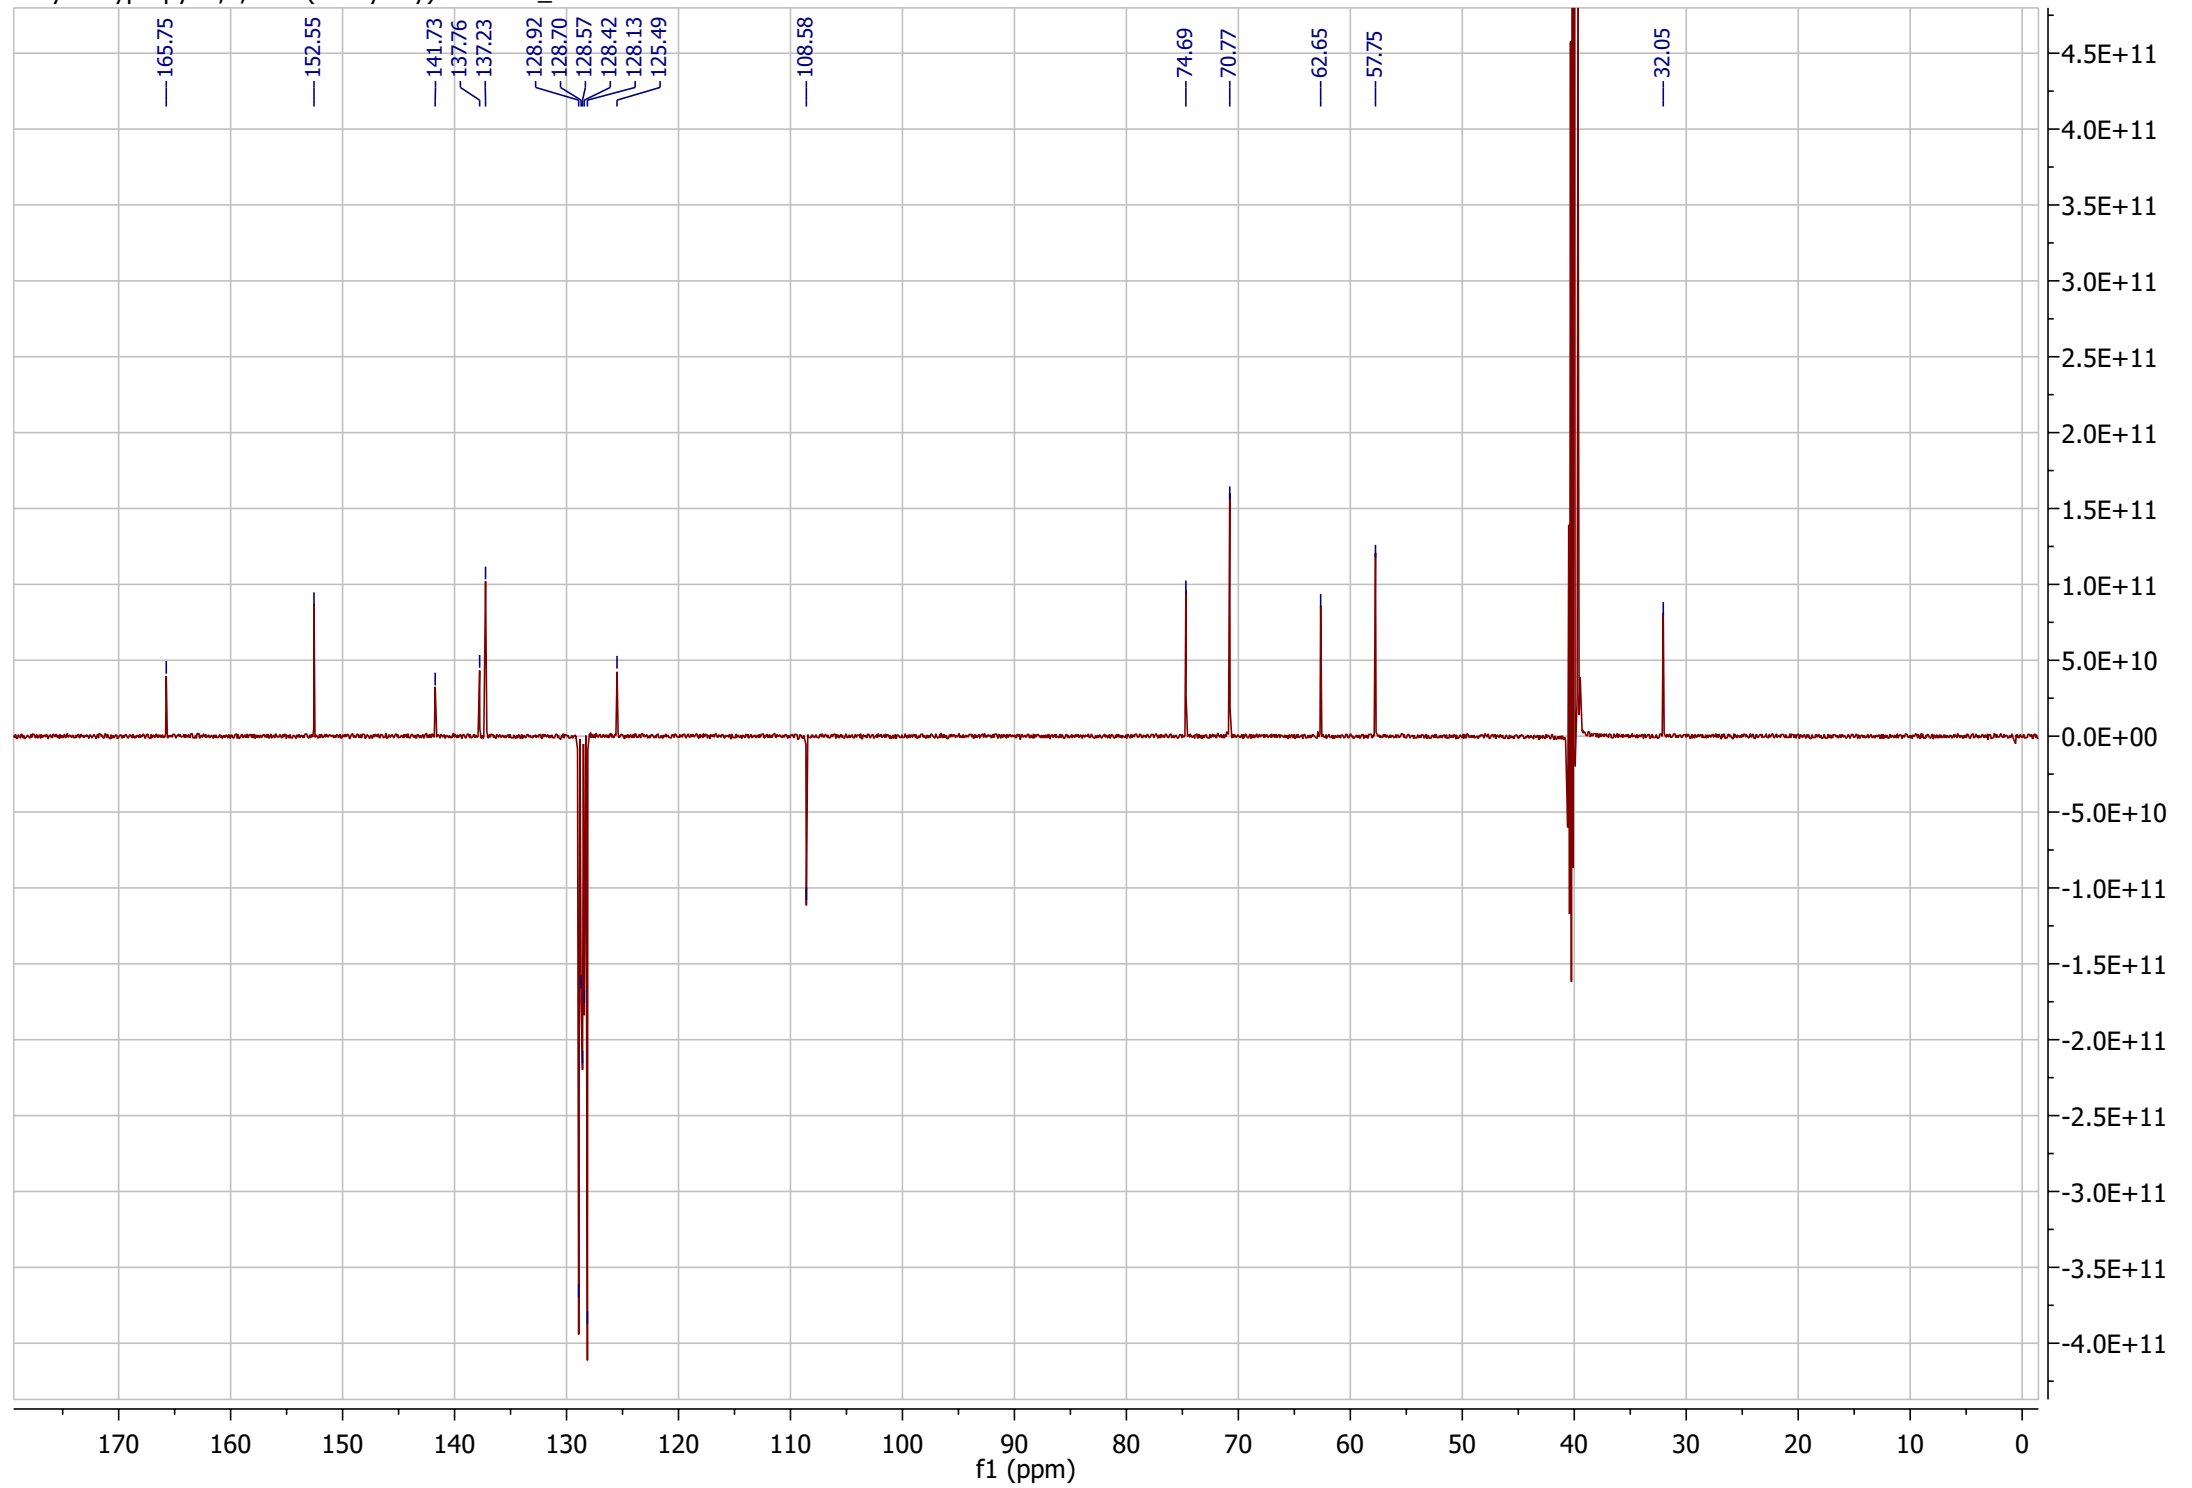

4-hydroxybutyl 3,4,5-tris(benzyloxy)benzoate\_DMSO

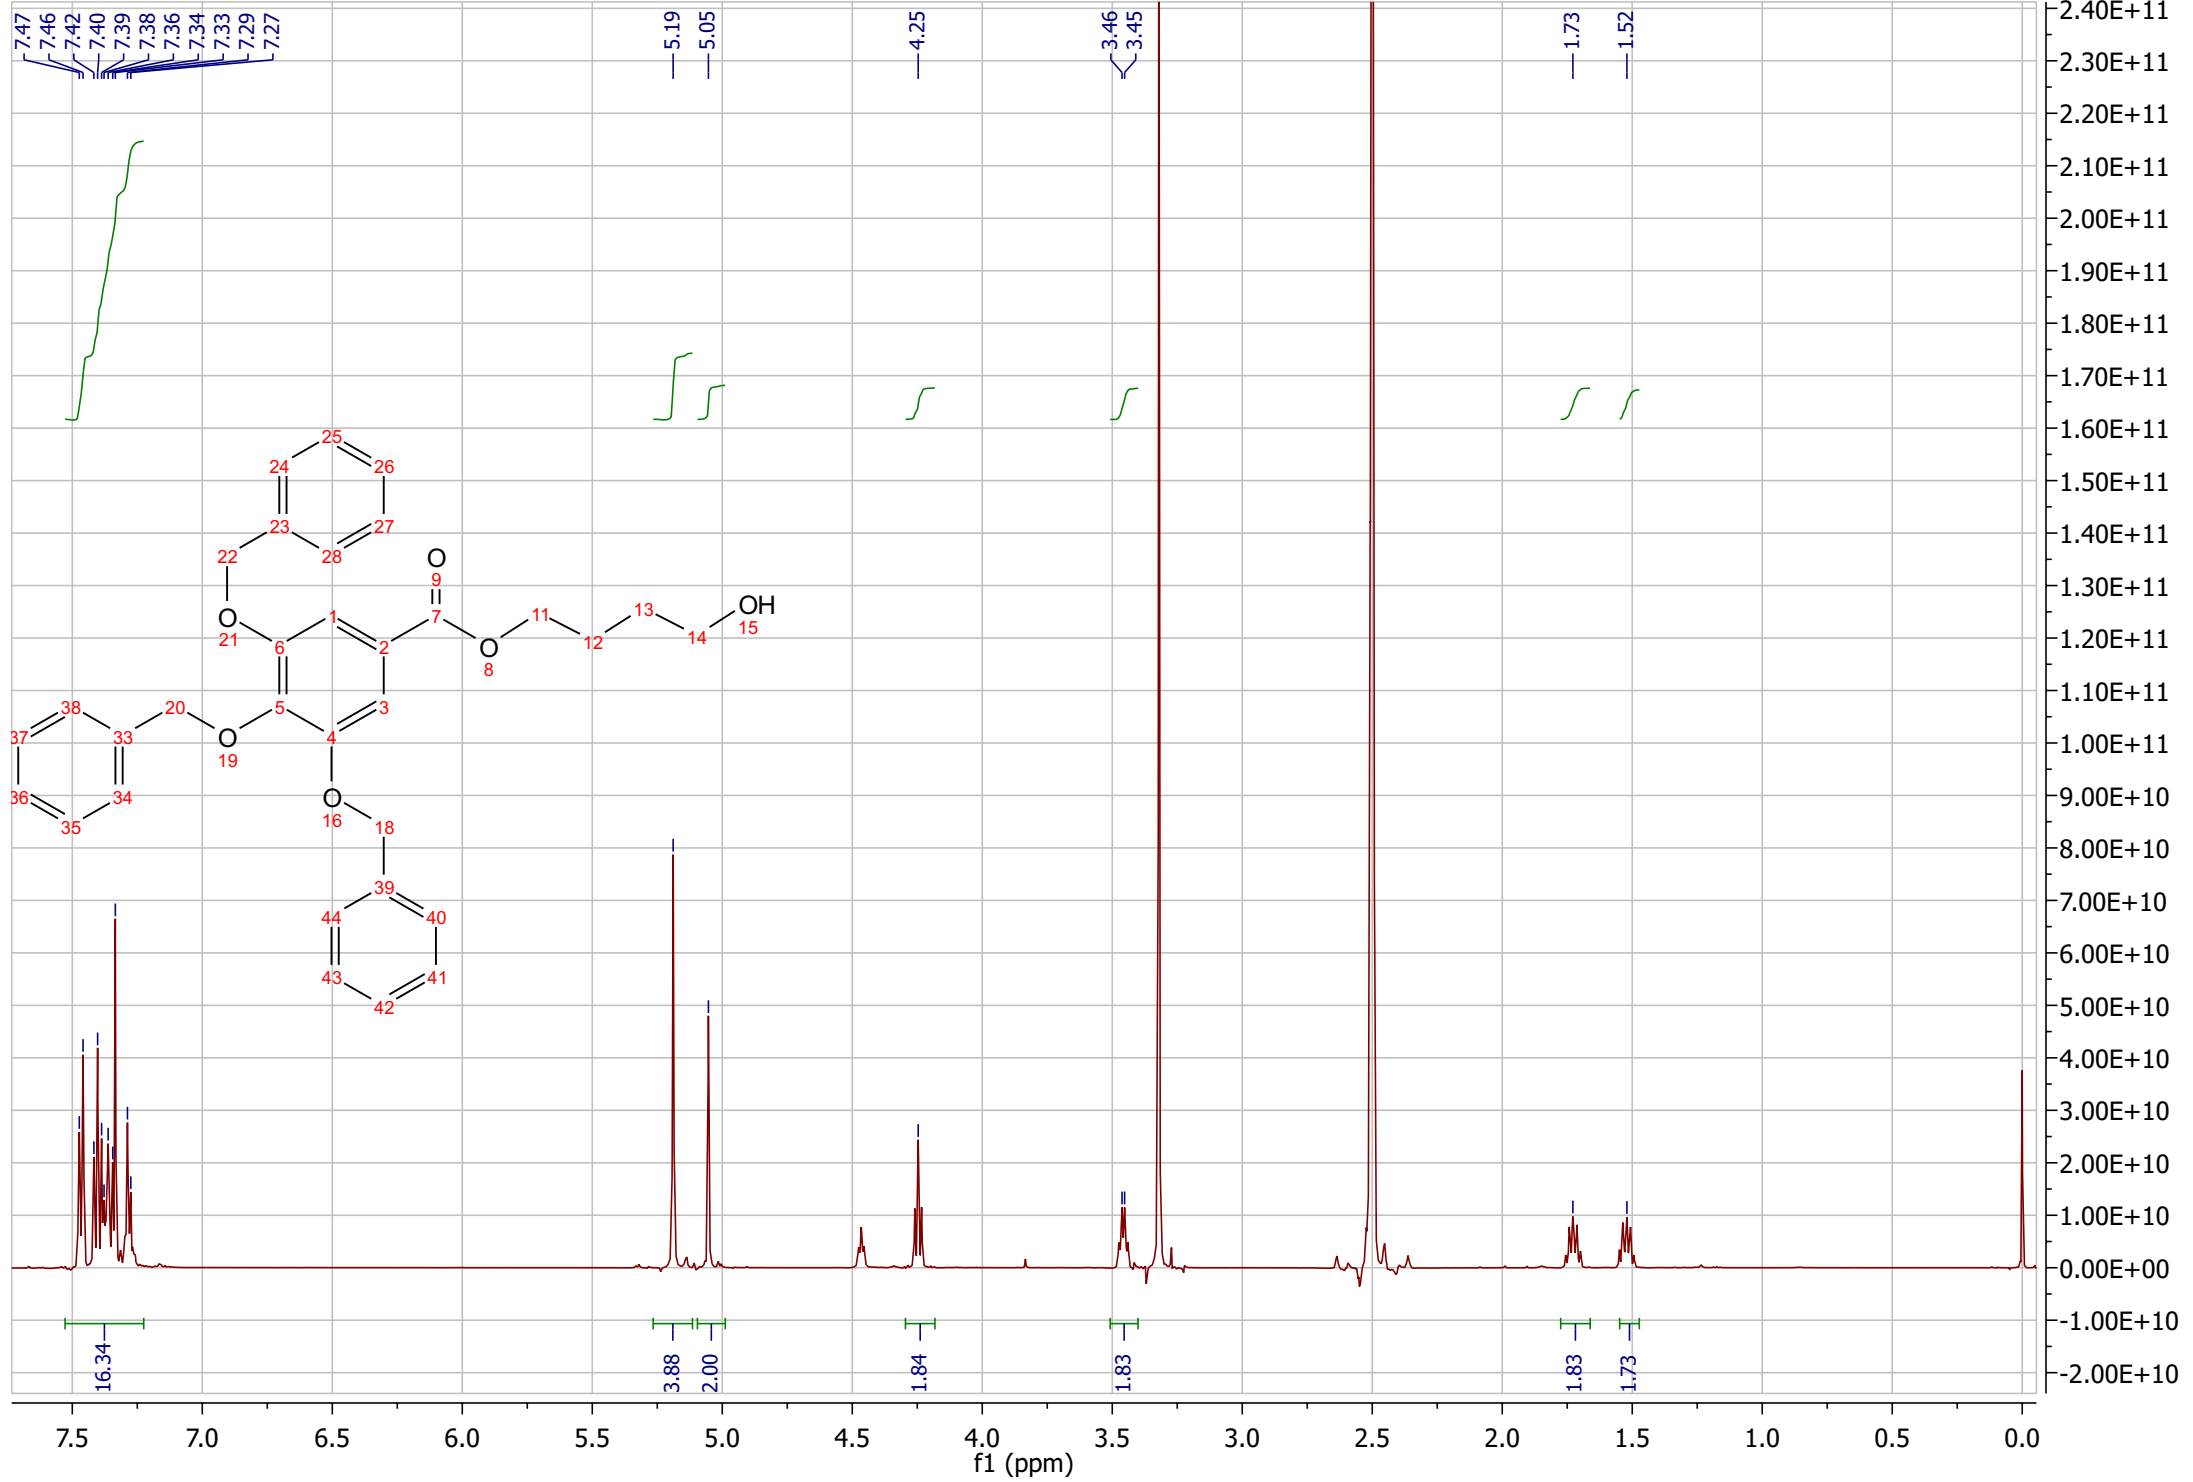



4-hydroxybutyl 3,4,5-tris(benzyloxy)benzoate\_DMSO

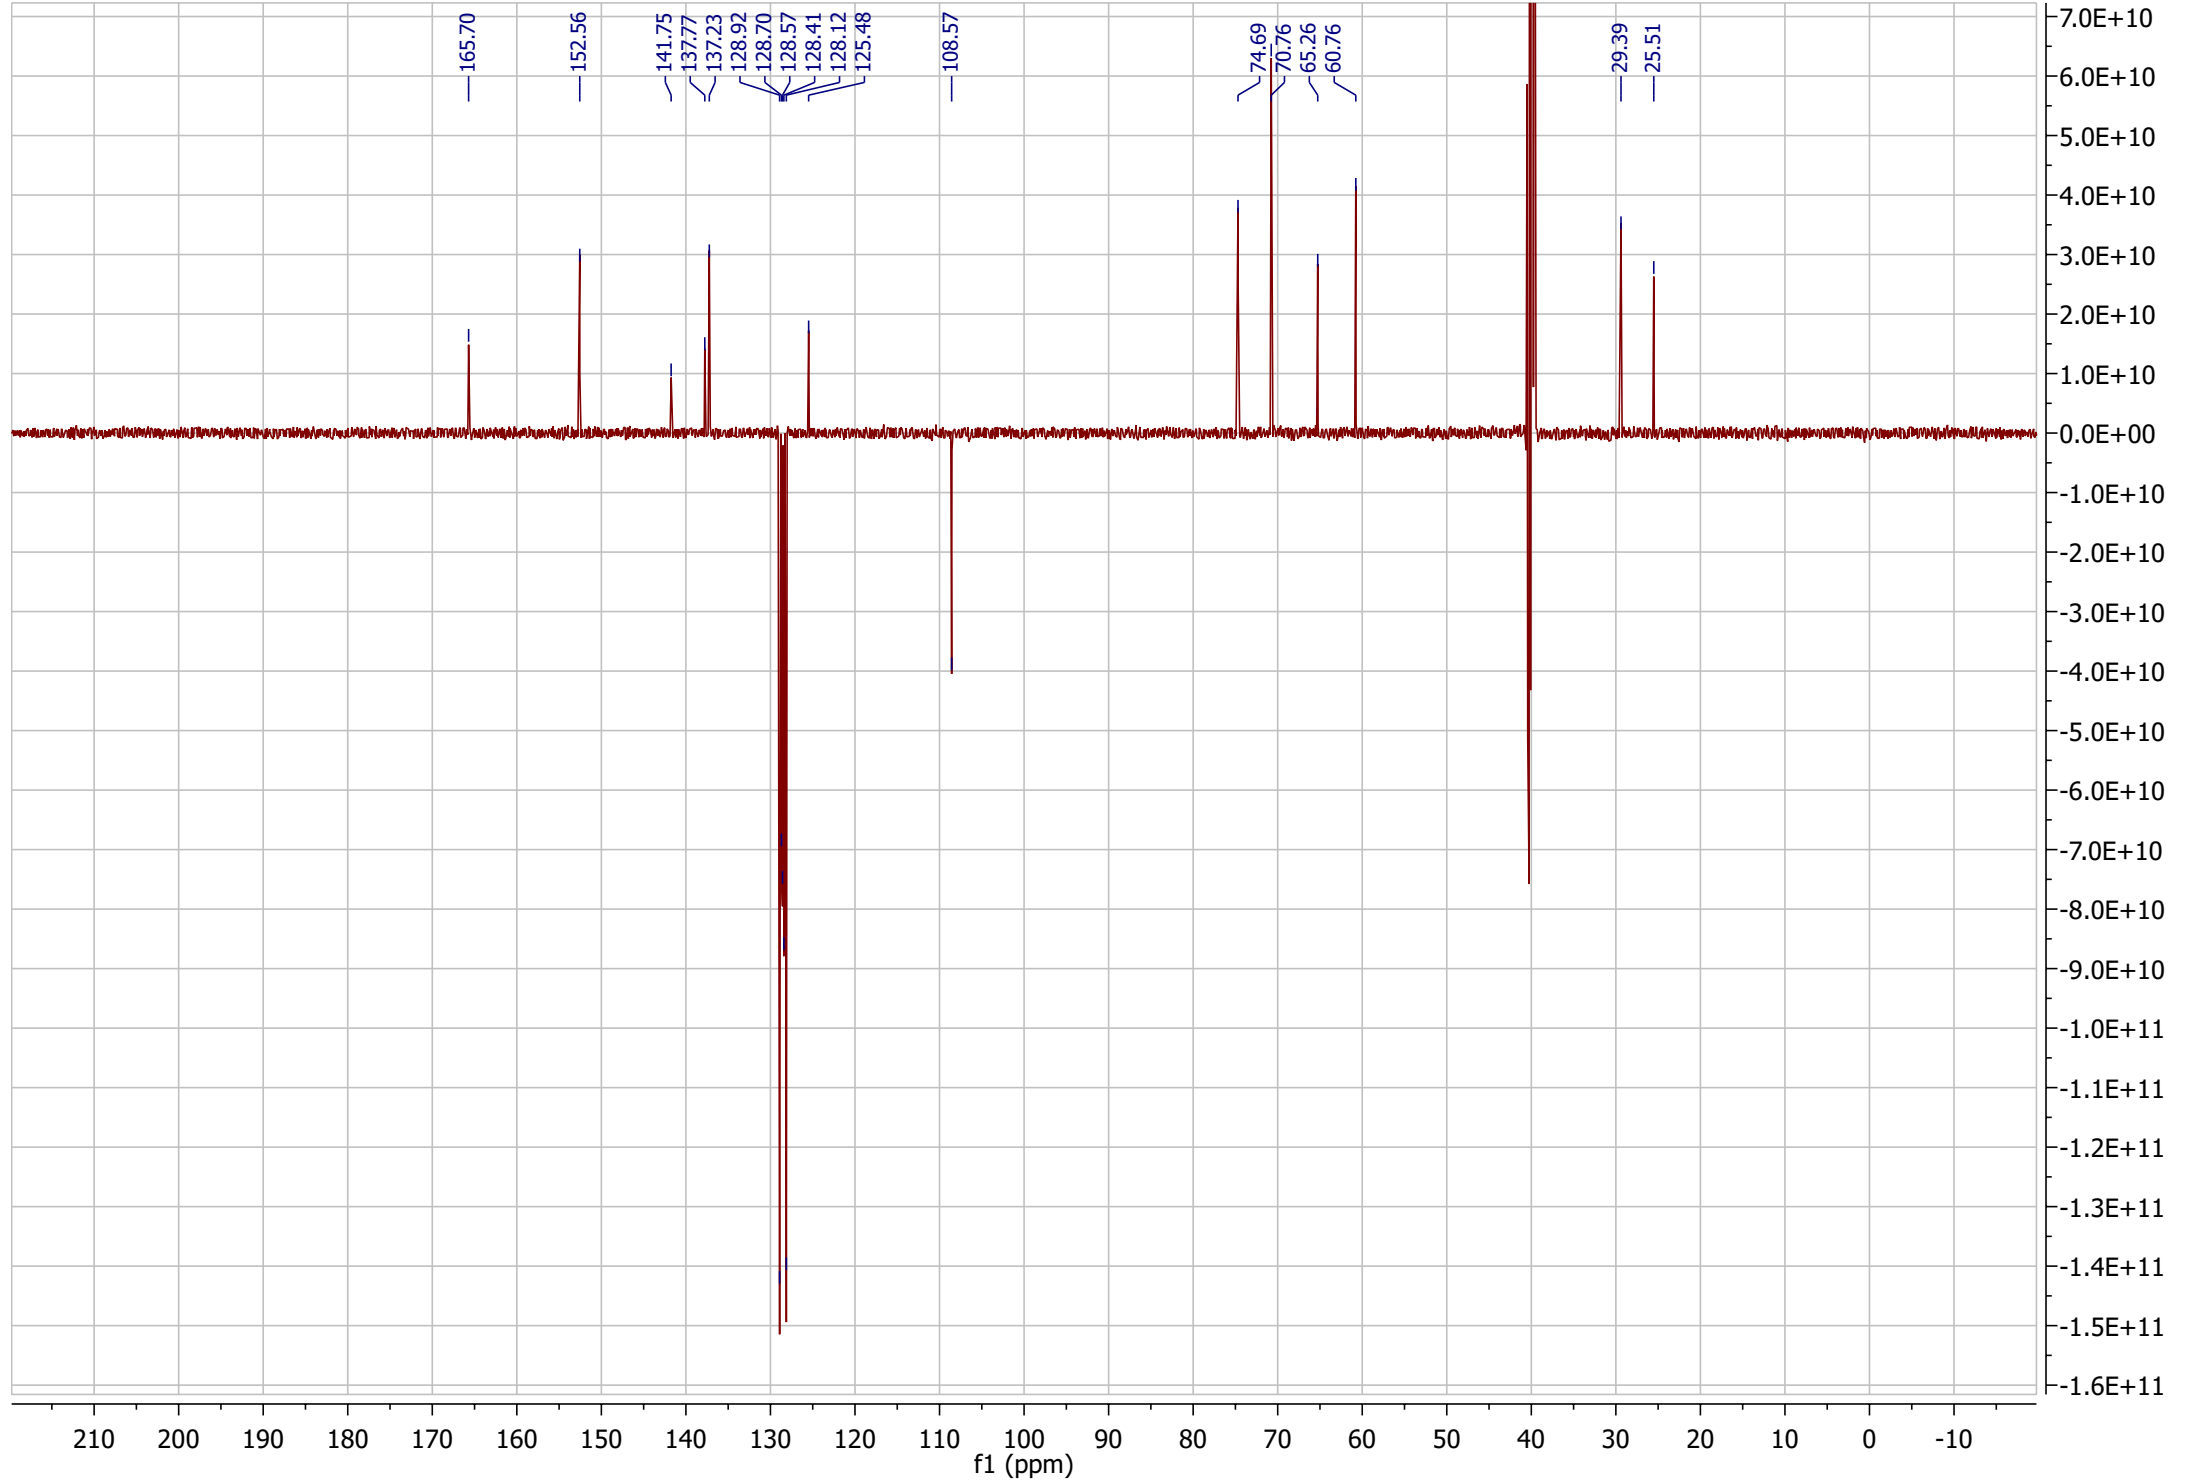

Ethane-1,2-diyl bis(3,4,5-tris(benzyloxy)benzoate)\_DMSO

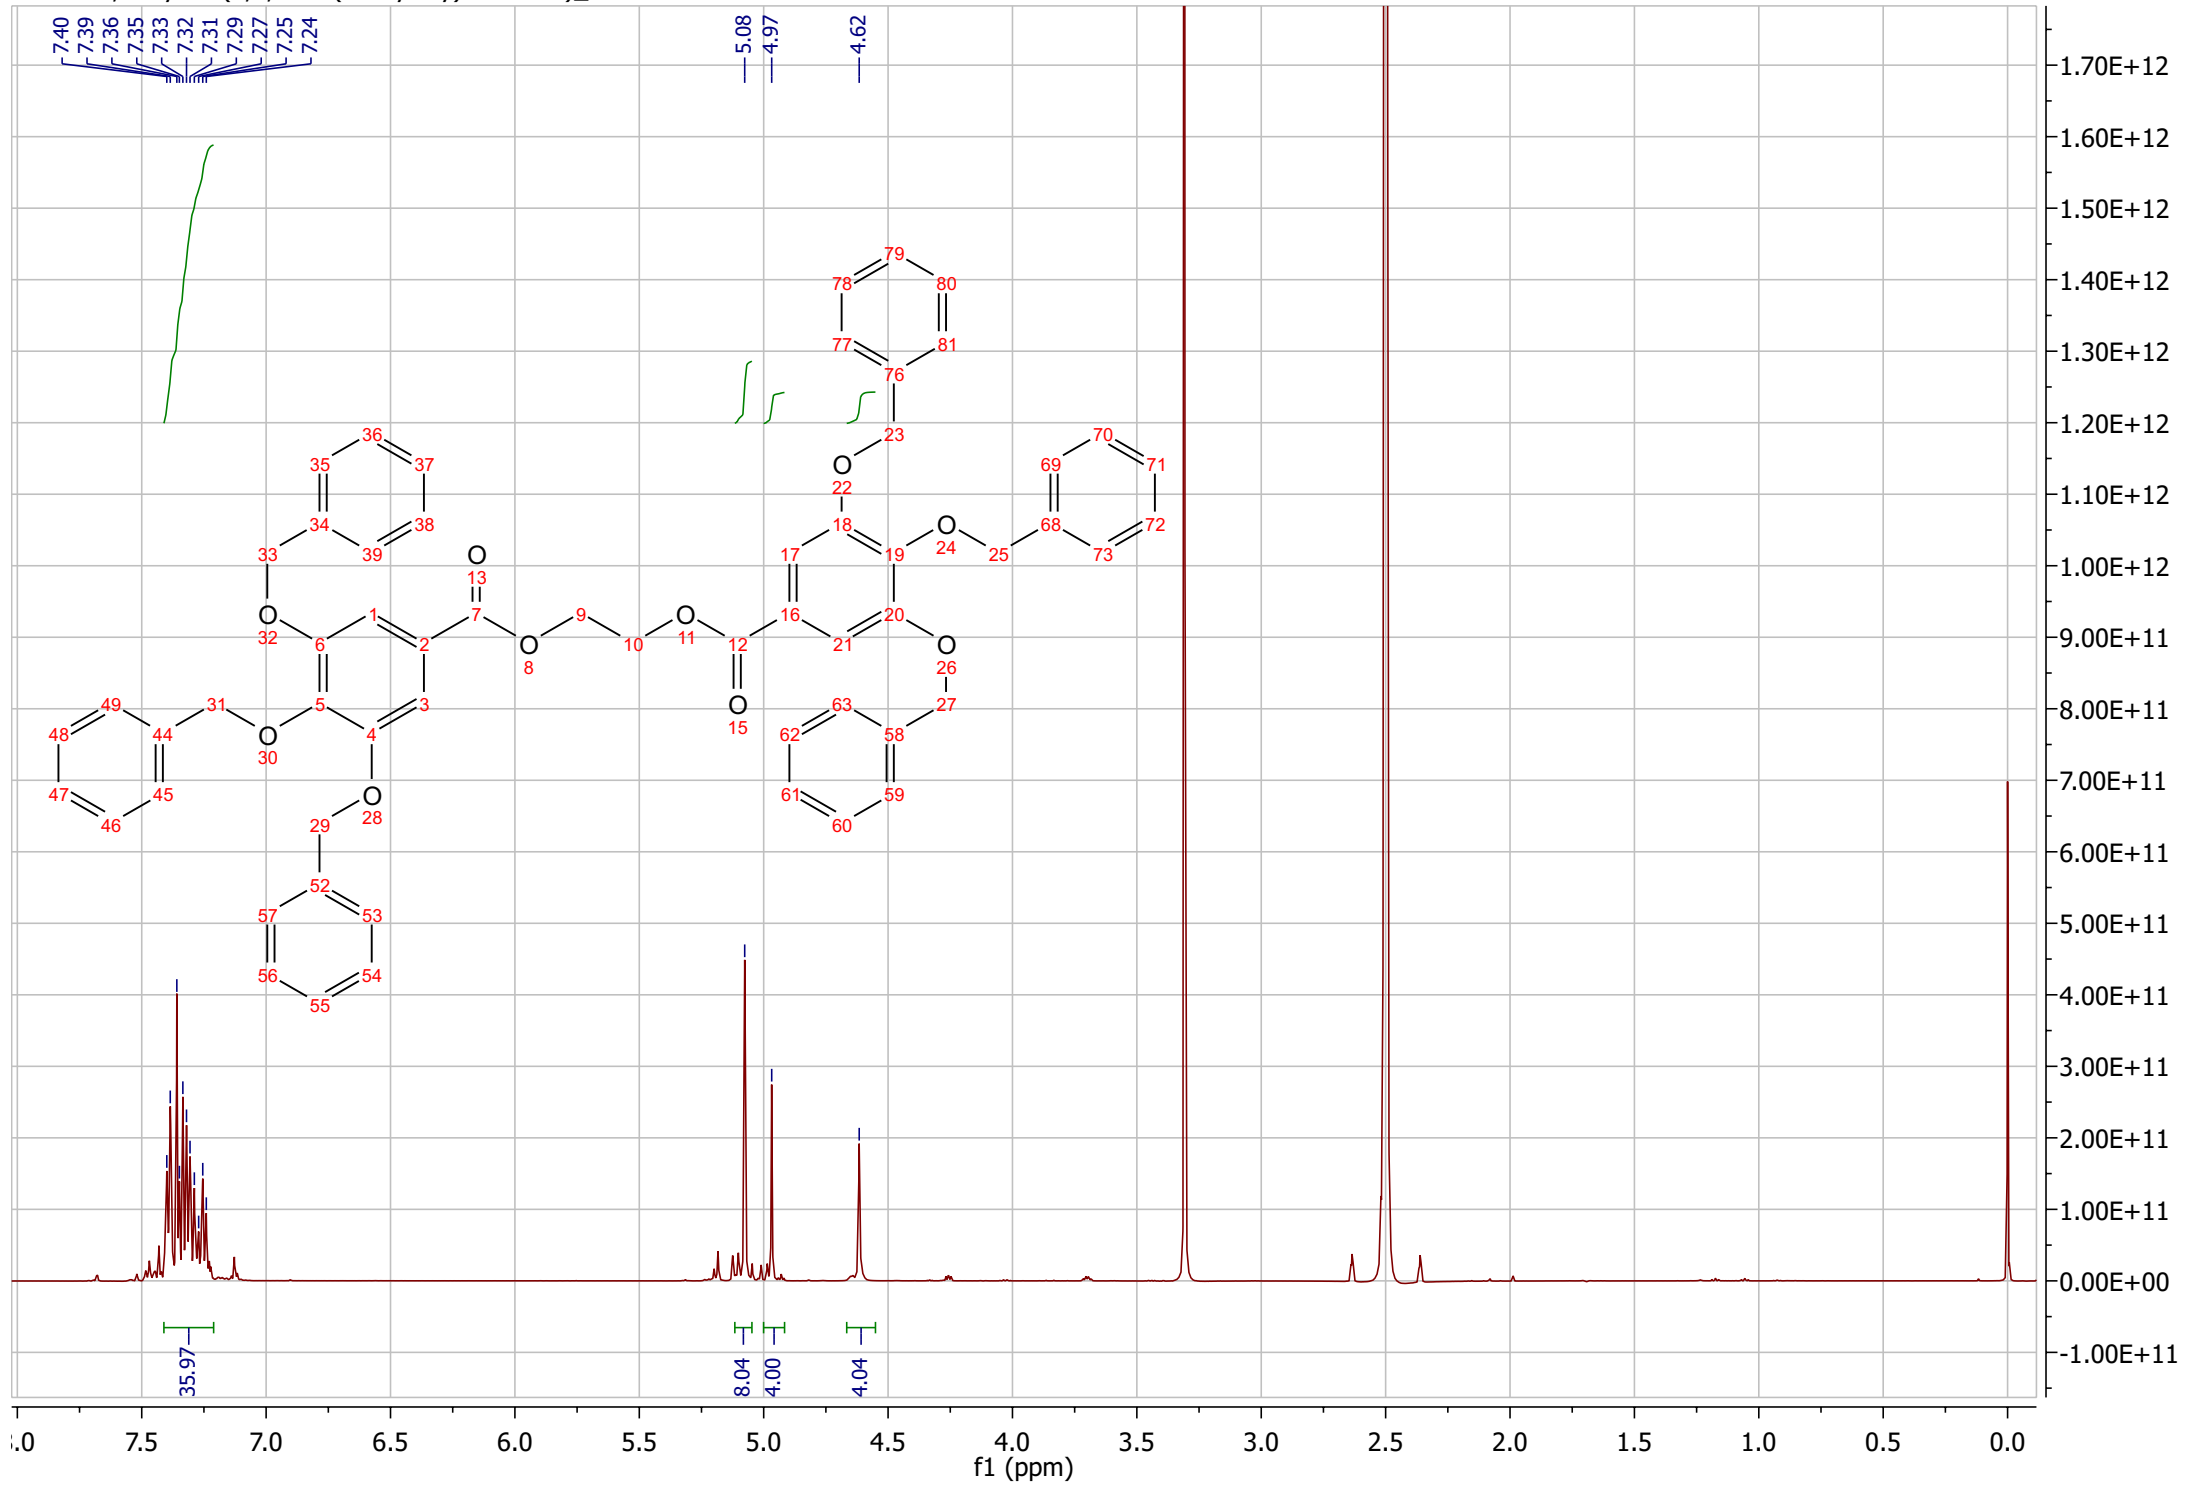

Ethane-1,2-diyl bis(3,4,5-tris(benzyloxy)benzoate)\_DMSO

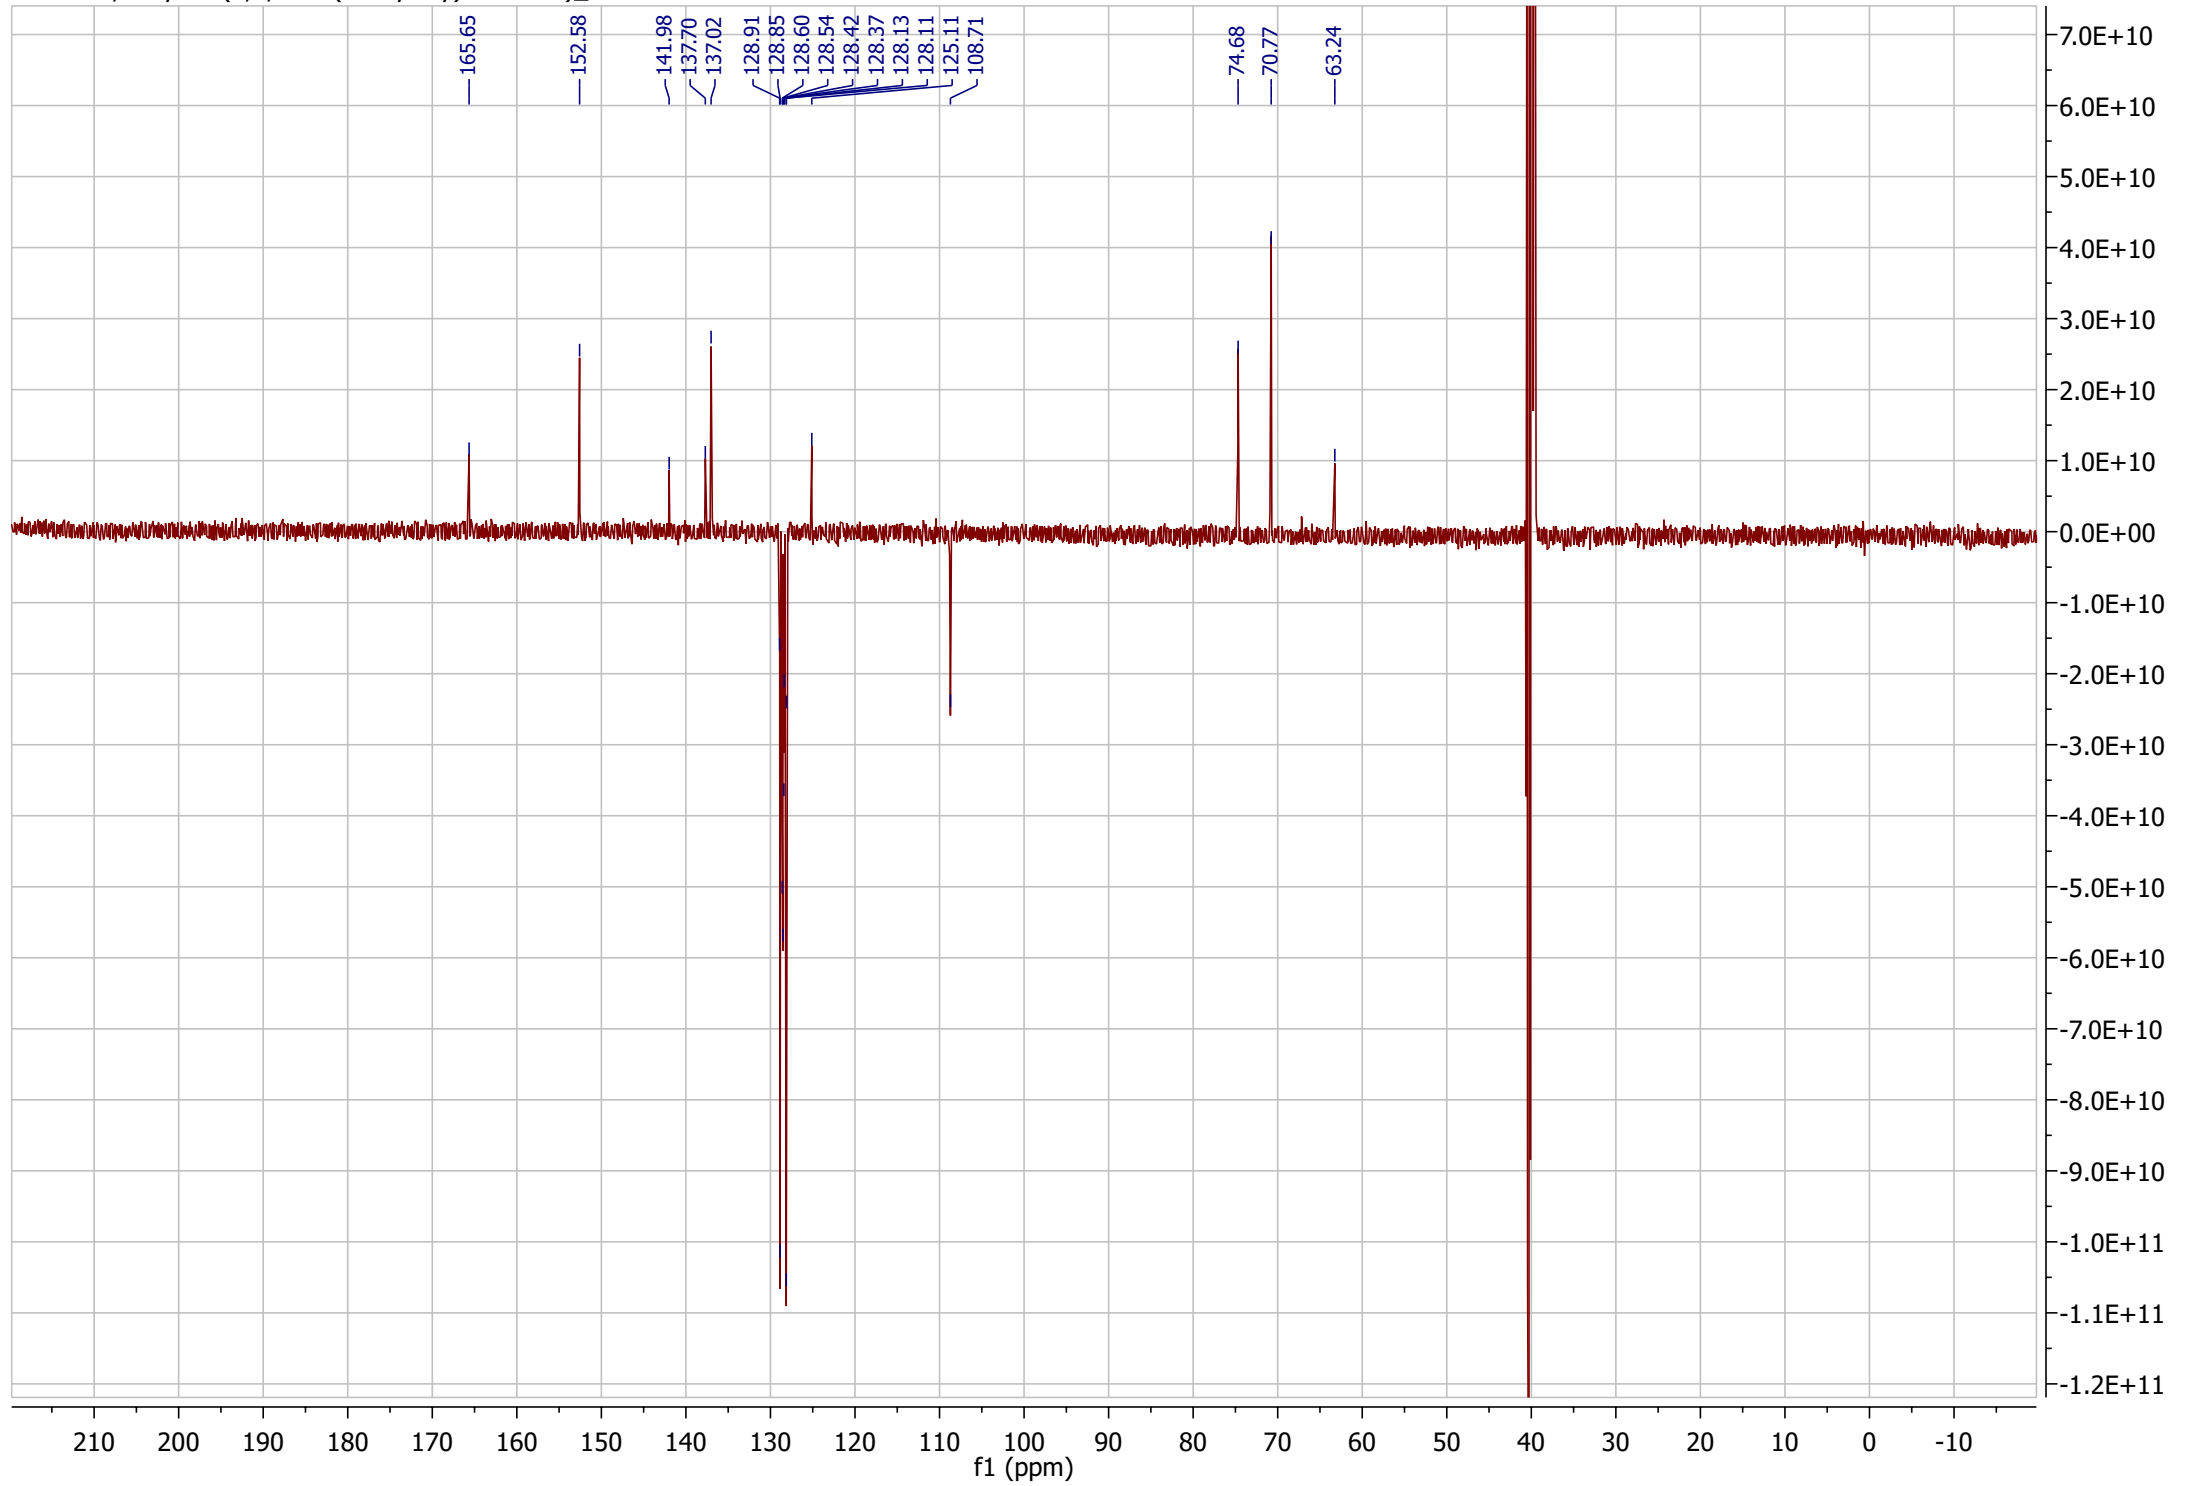

Propane-1,3-diyl bis(3,4,5-tris(benzyloxy)benzoate)\_DMSO

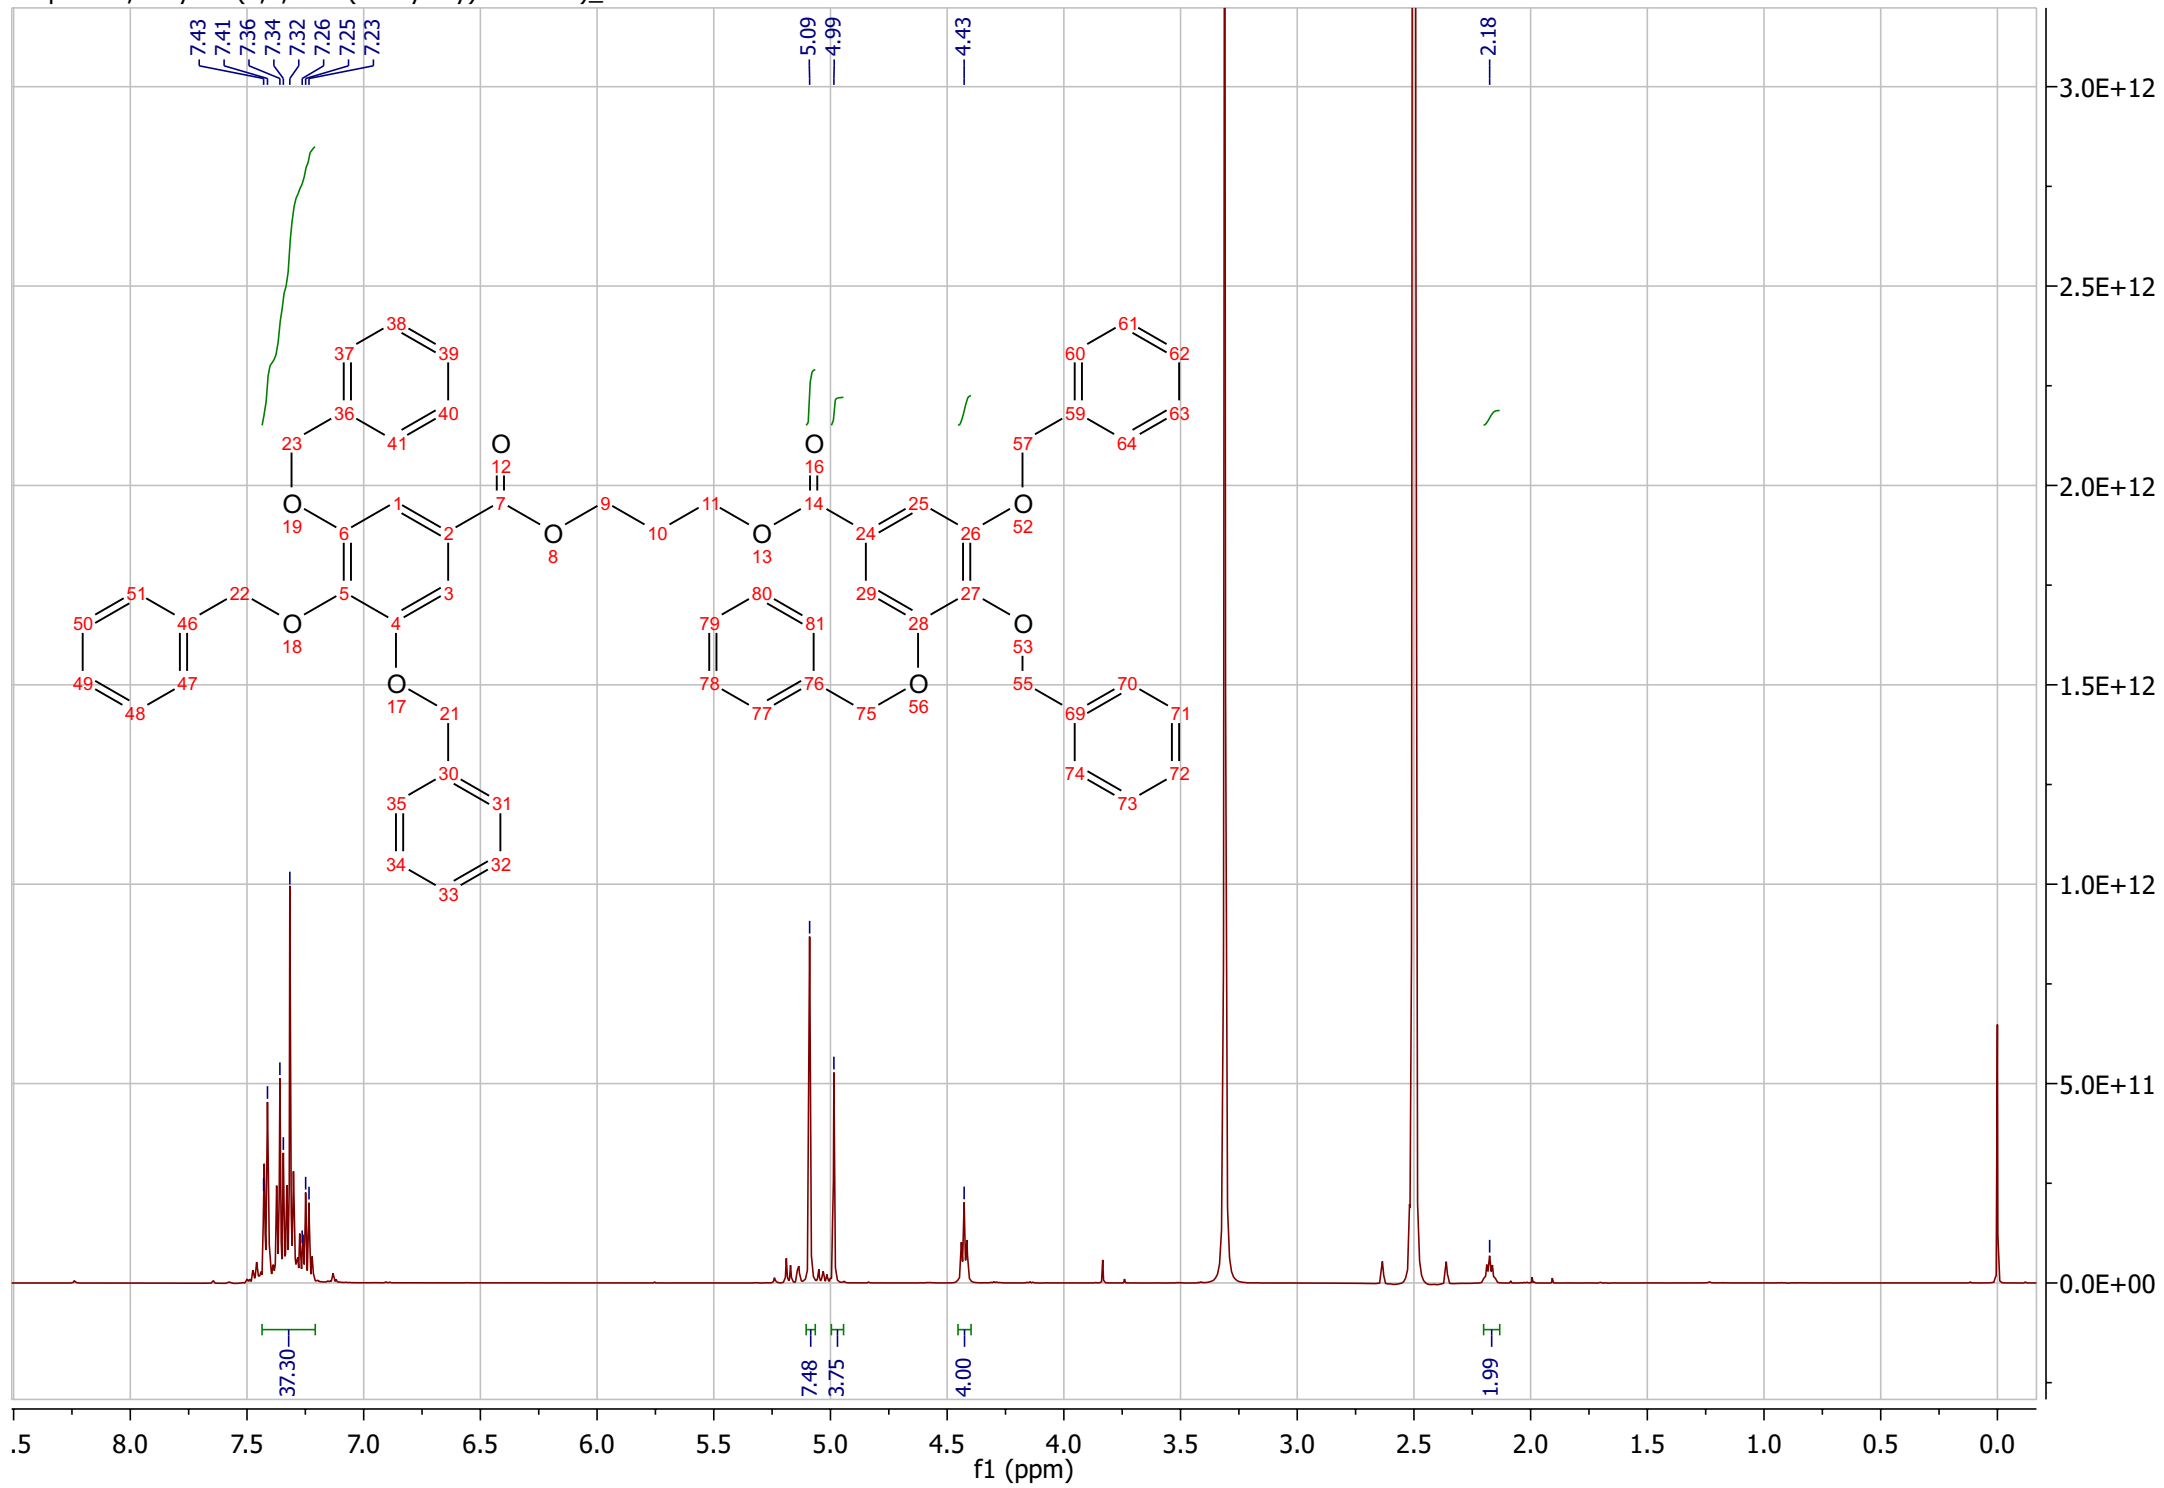

Propane-1,3-diyl bis(3,4,5-tris(benzyloxy)benzoate)\_DMSO

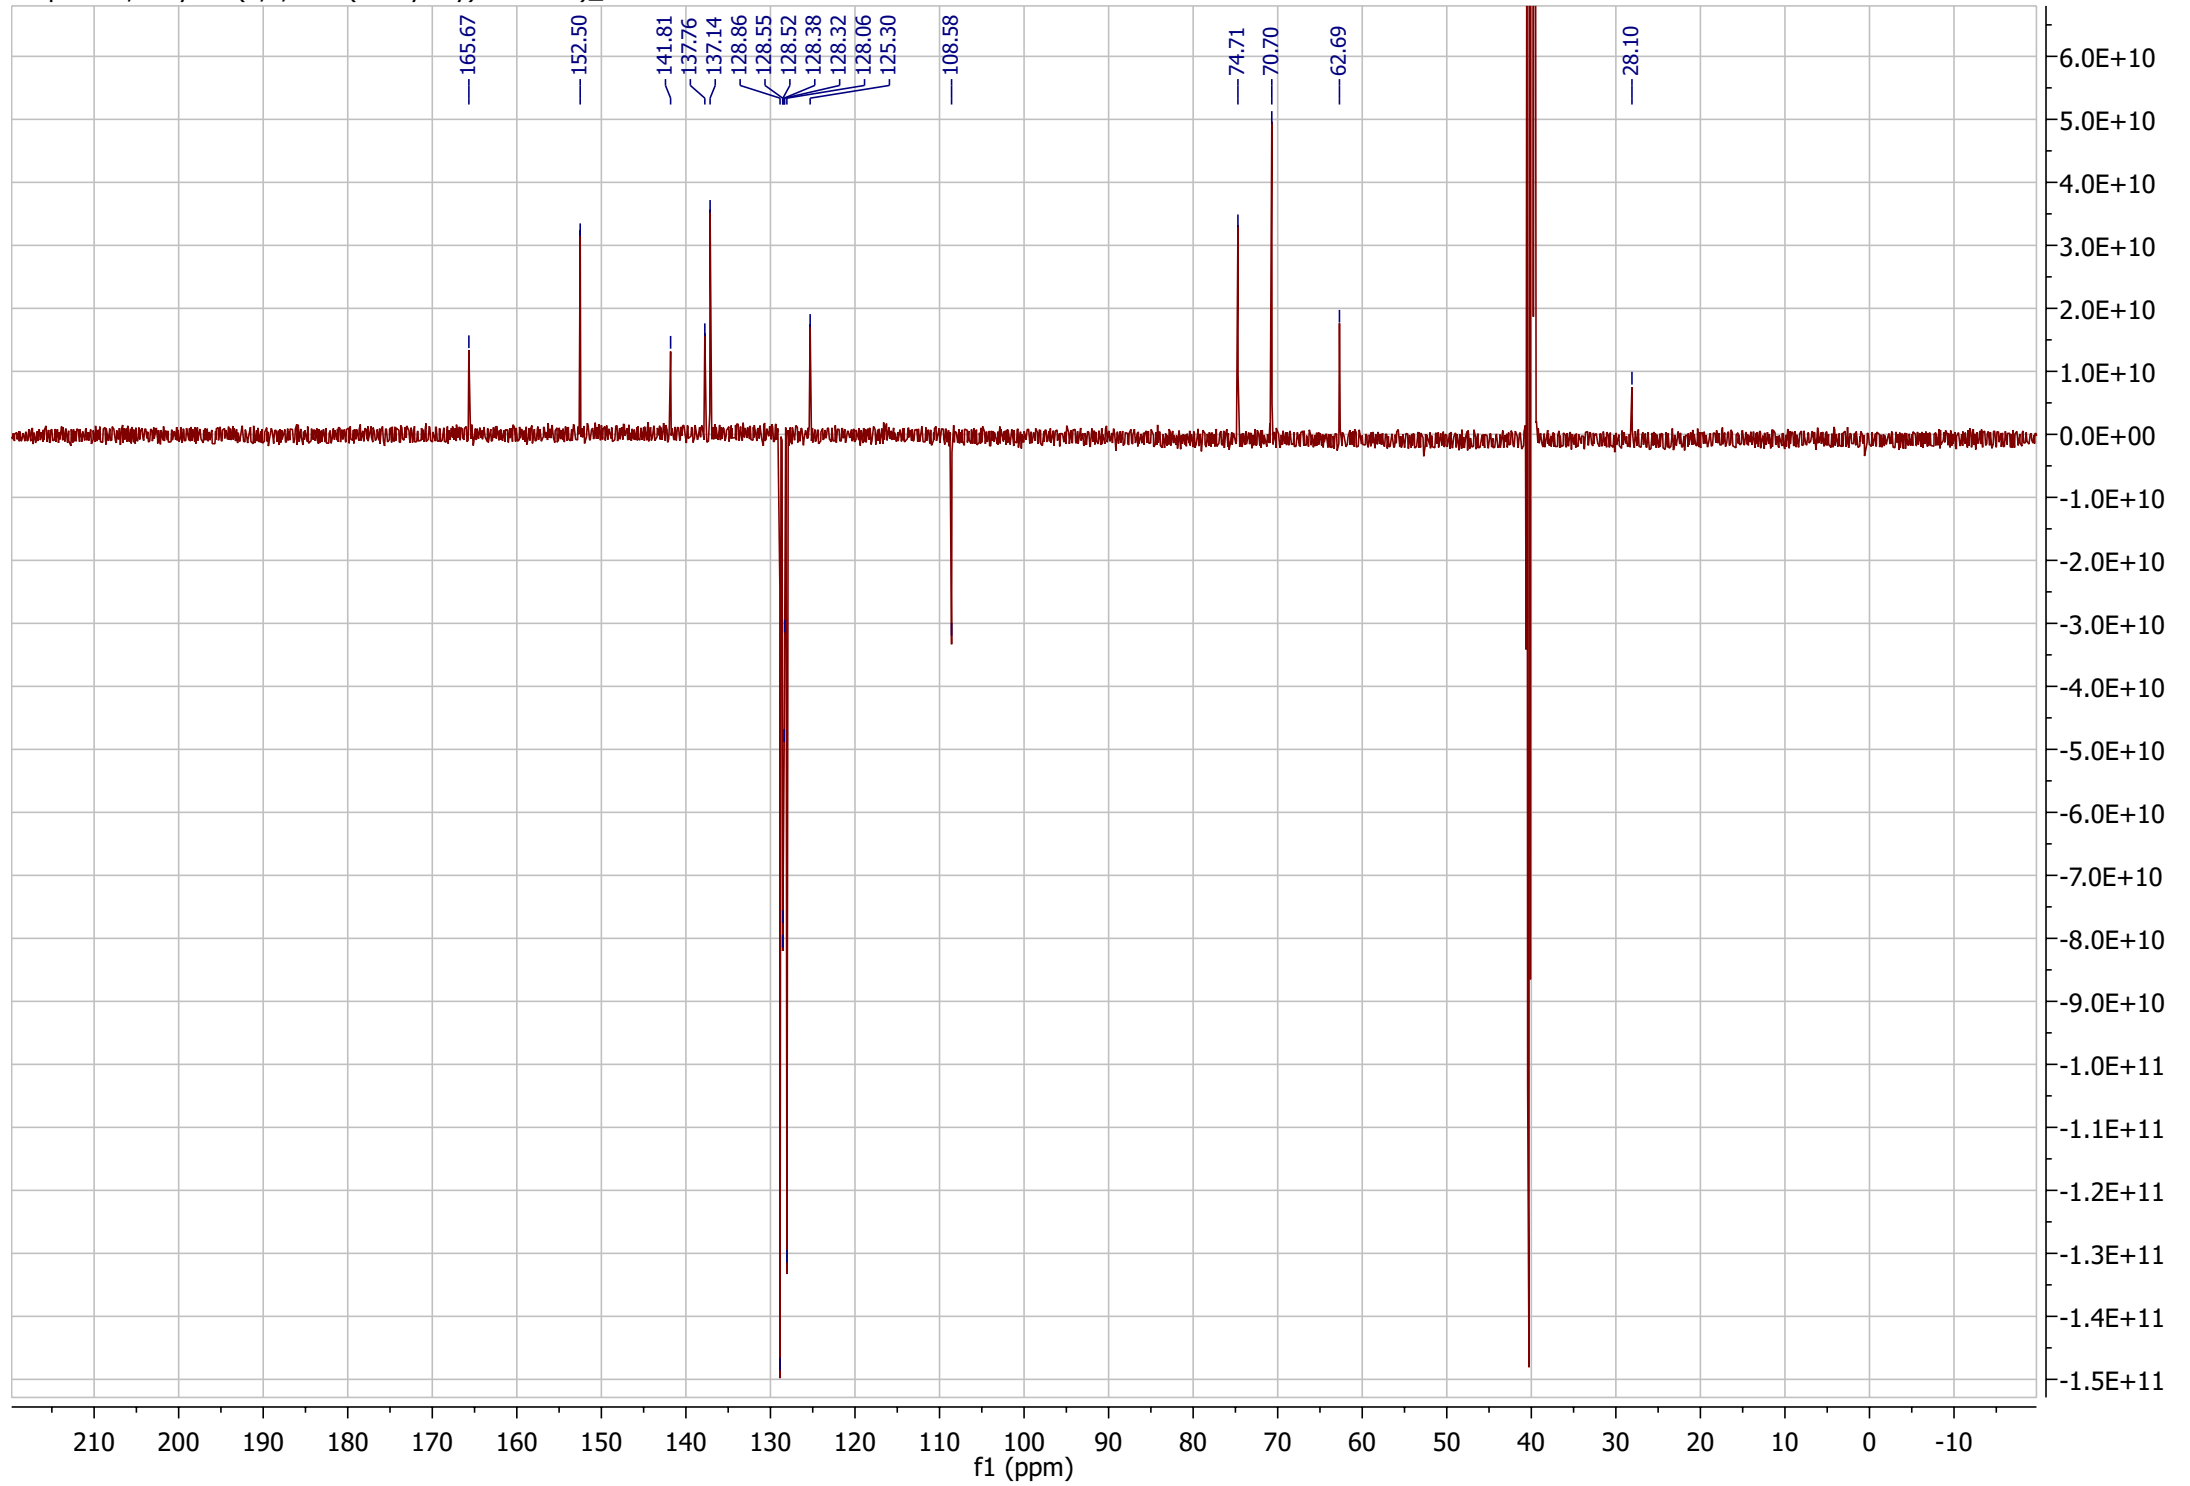

Butane-1,4-diyl bis(3,4,5-tris(benzyloxy)benzoate)\_DMSO

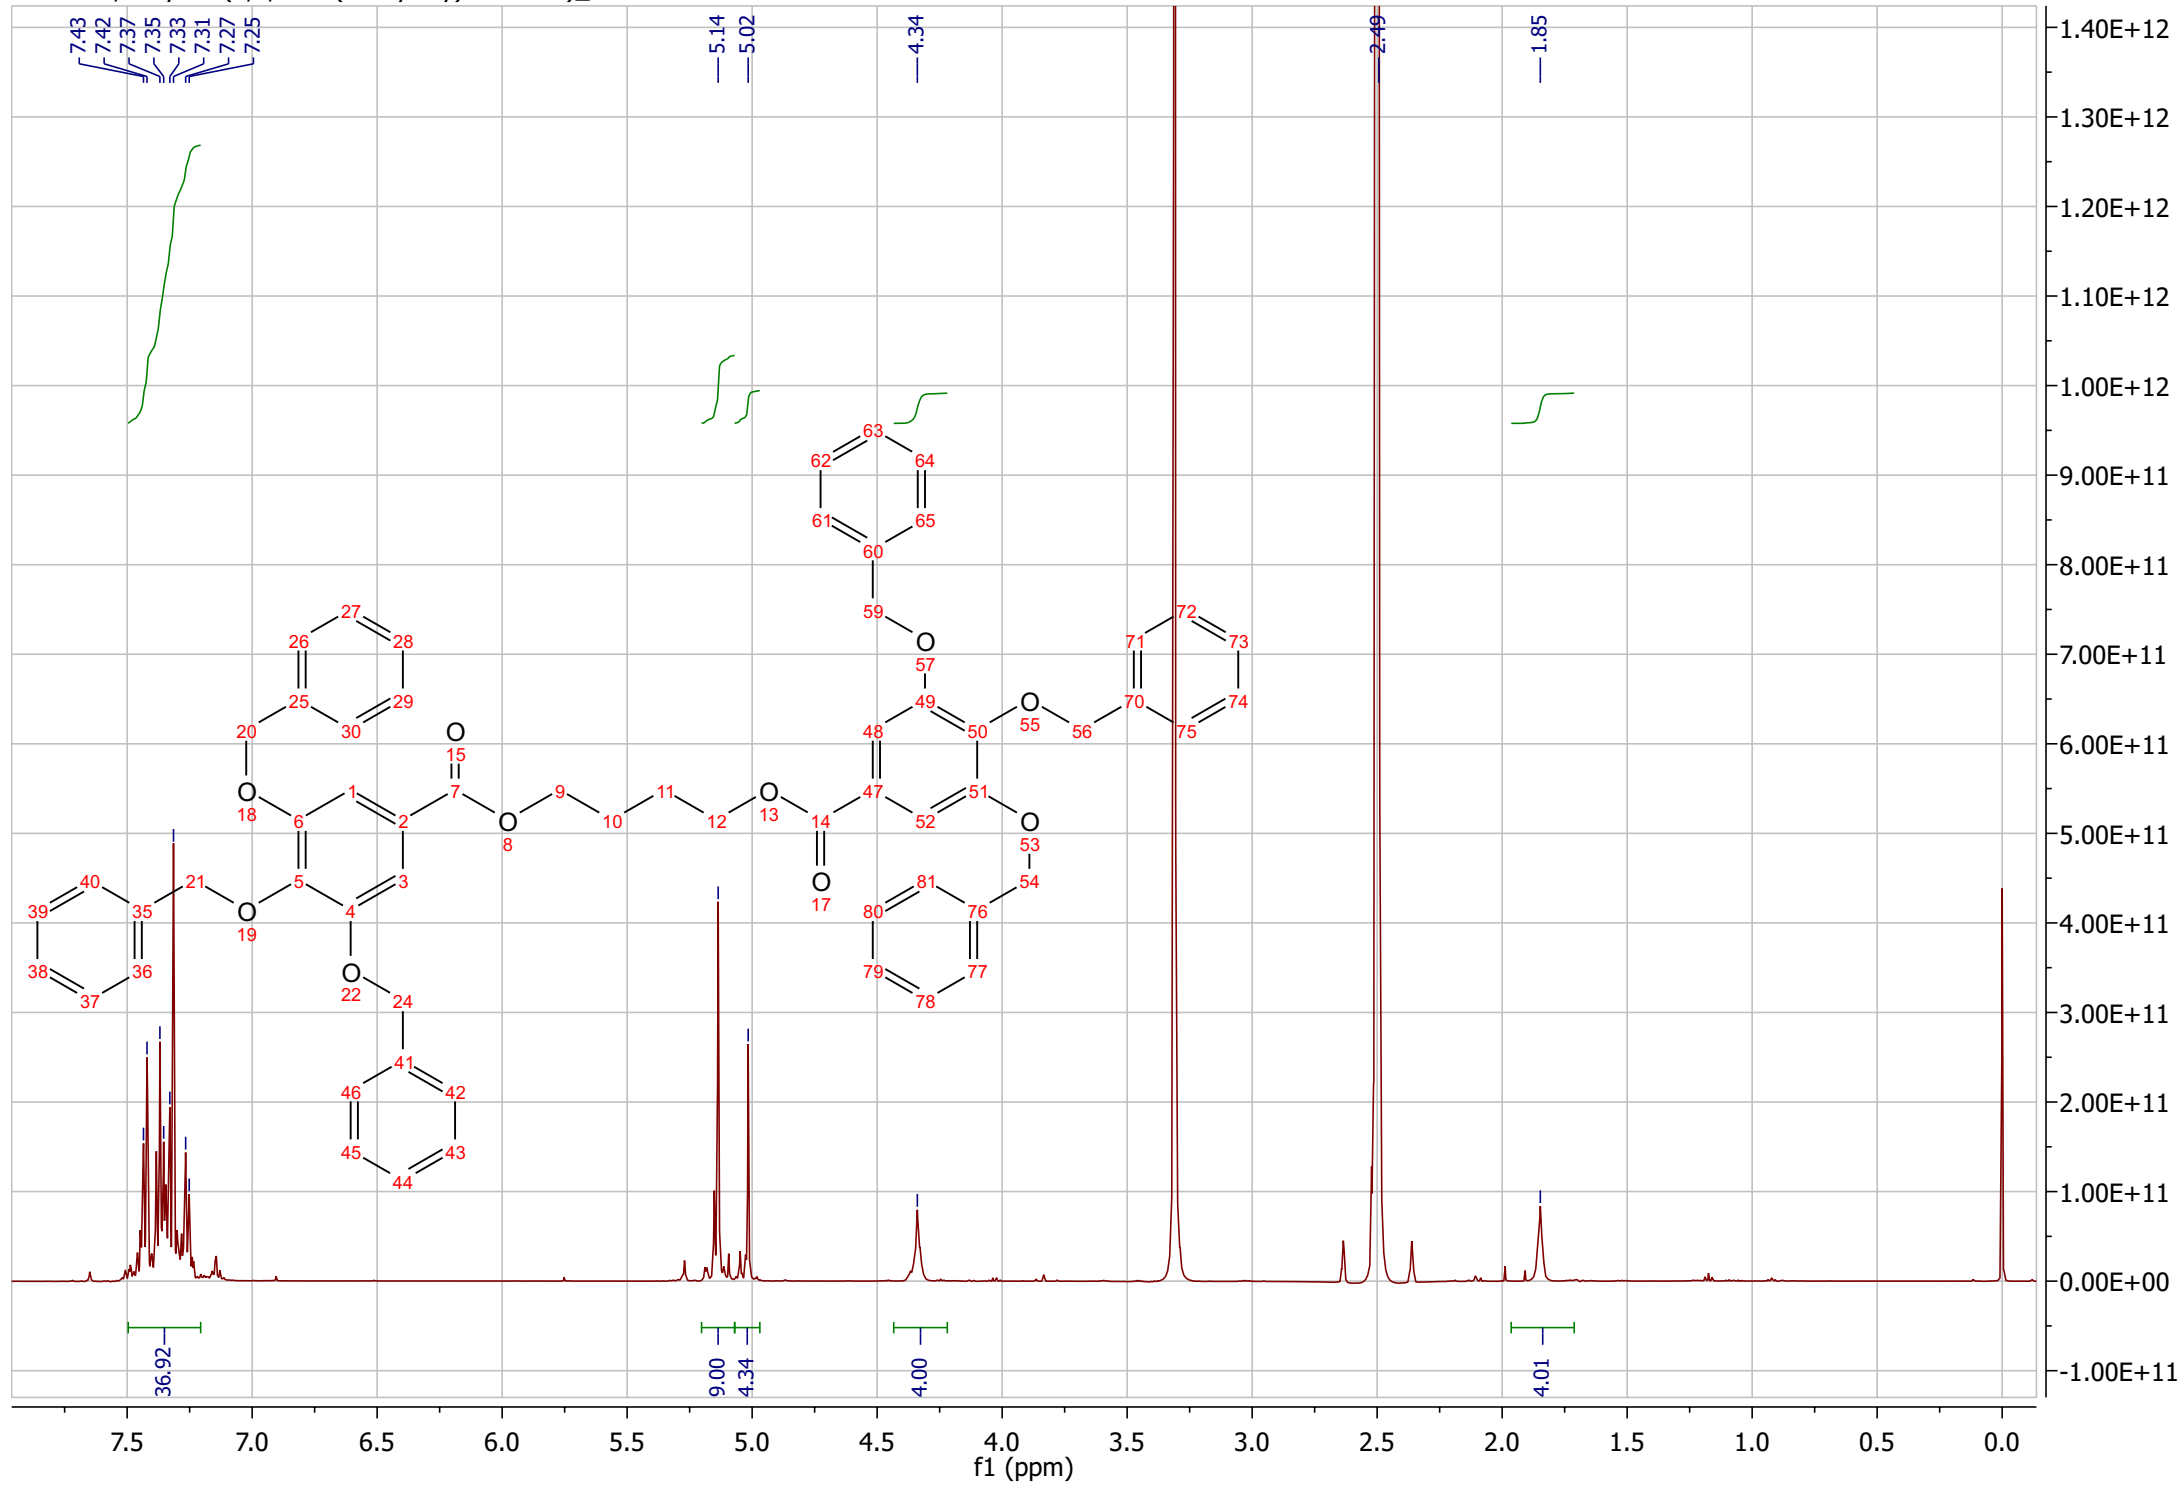

Butane-1,4-diyl bis(3,4,5-tris(benzyloxy)benzoate)\_DMSO

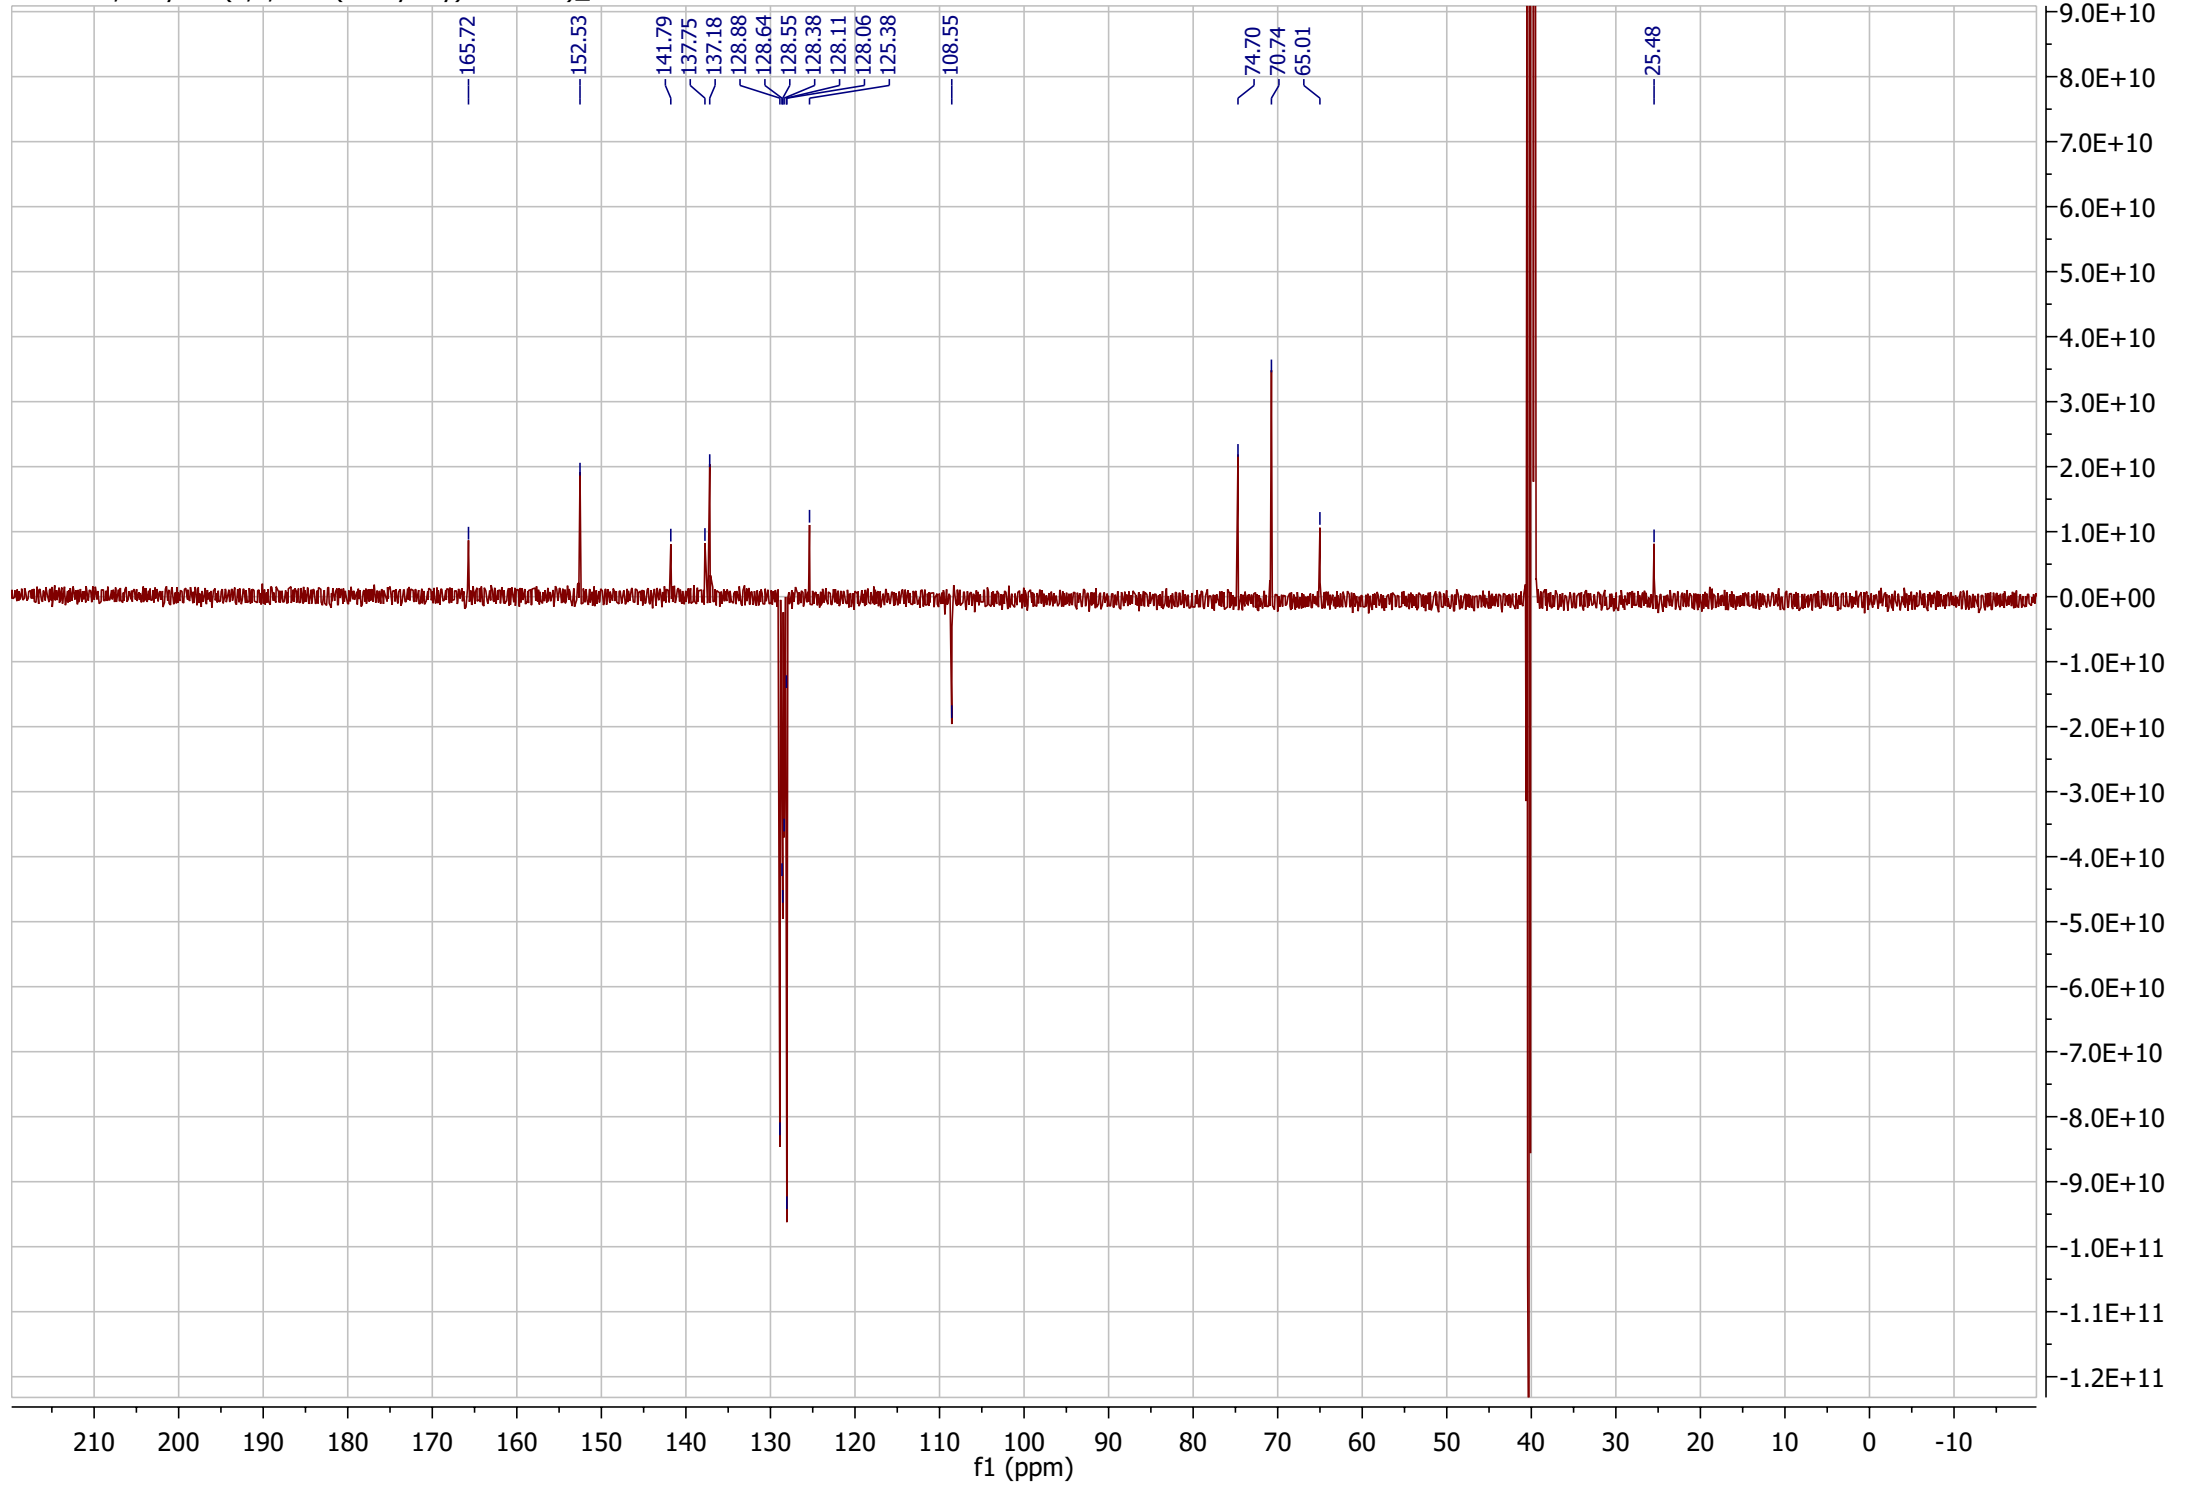

Propane-1,3-diyl bis(3,4-di(benzyloxy)benzoate)\_CDCl3

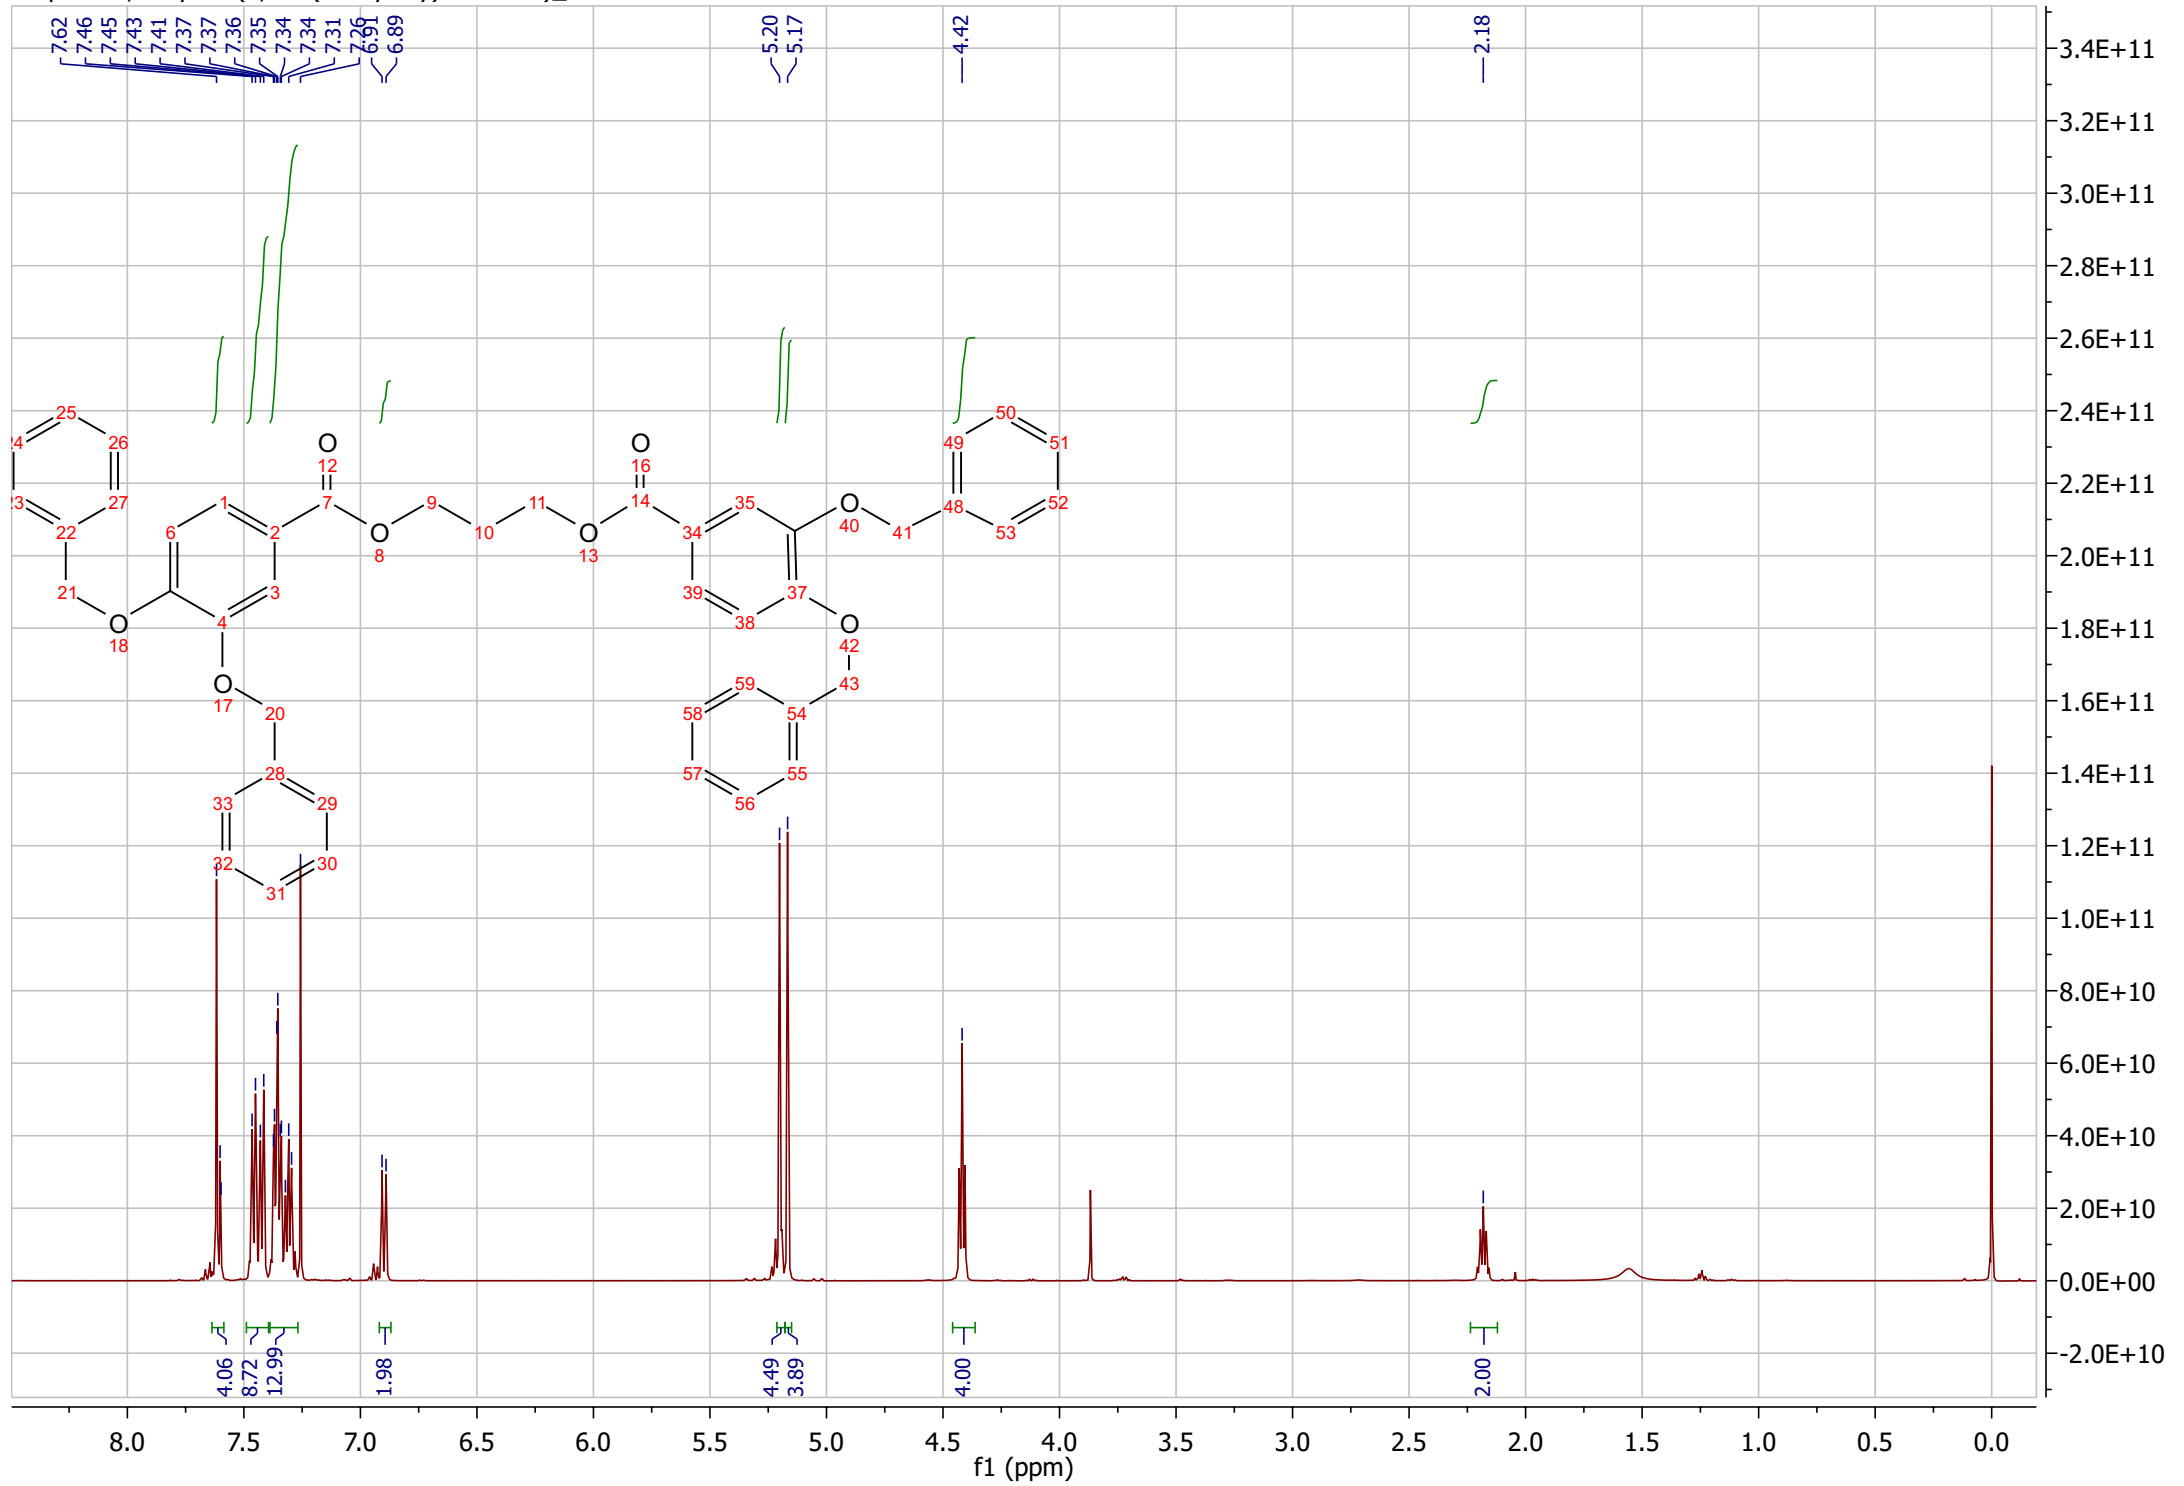



Propane-1,3-diyl bis(3,4-di(benzyloxy)benzoate)\_CDCl3

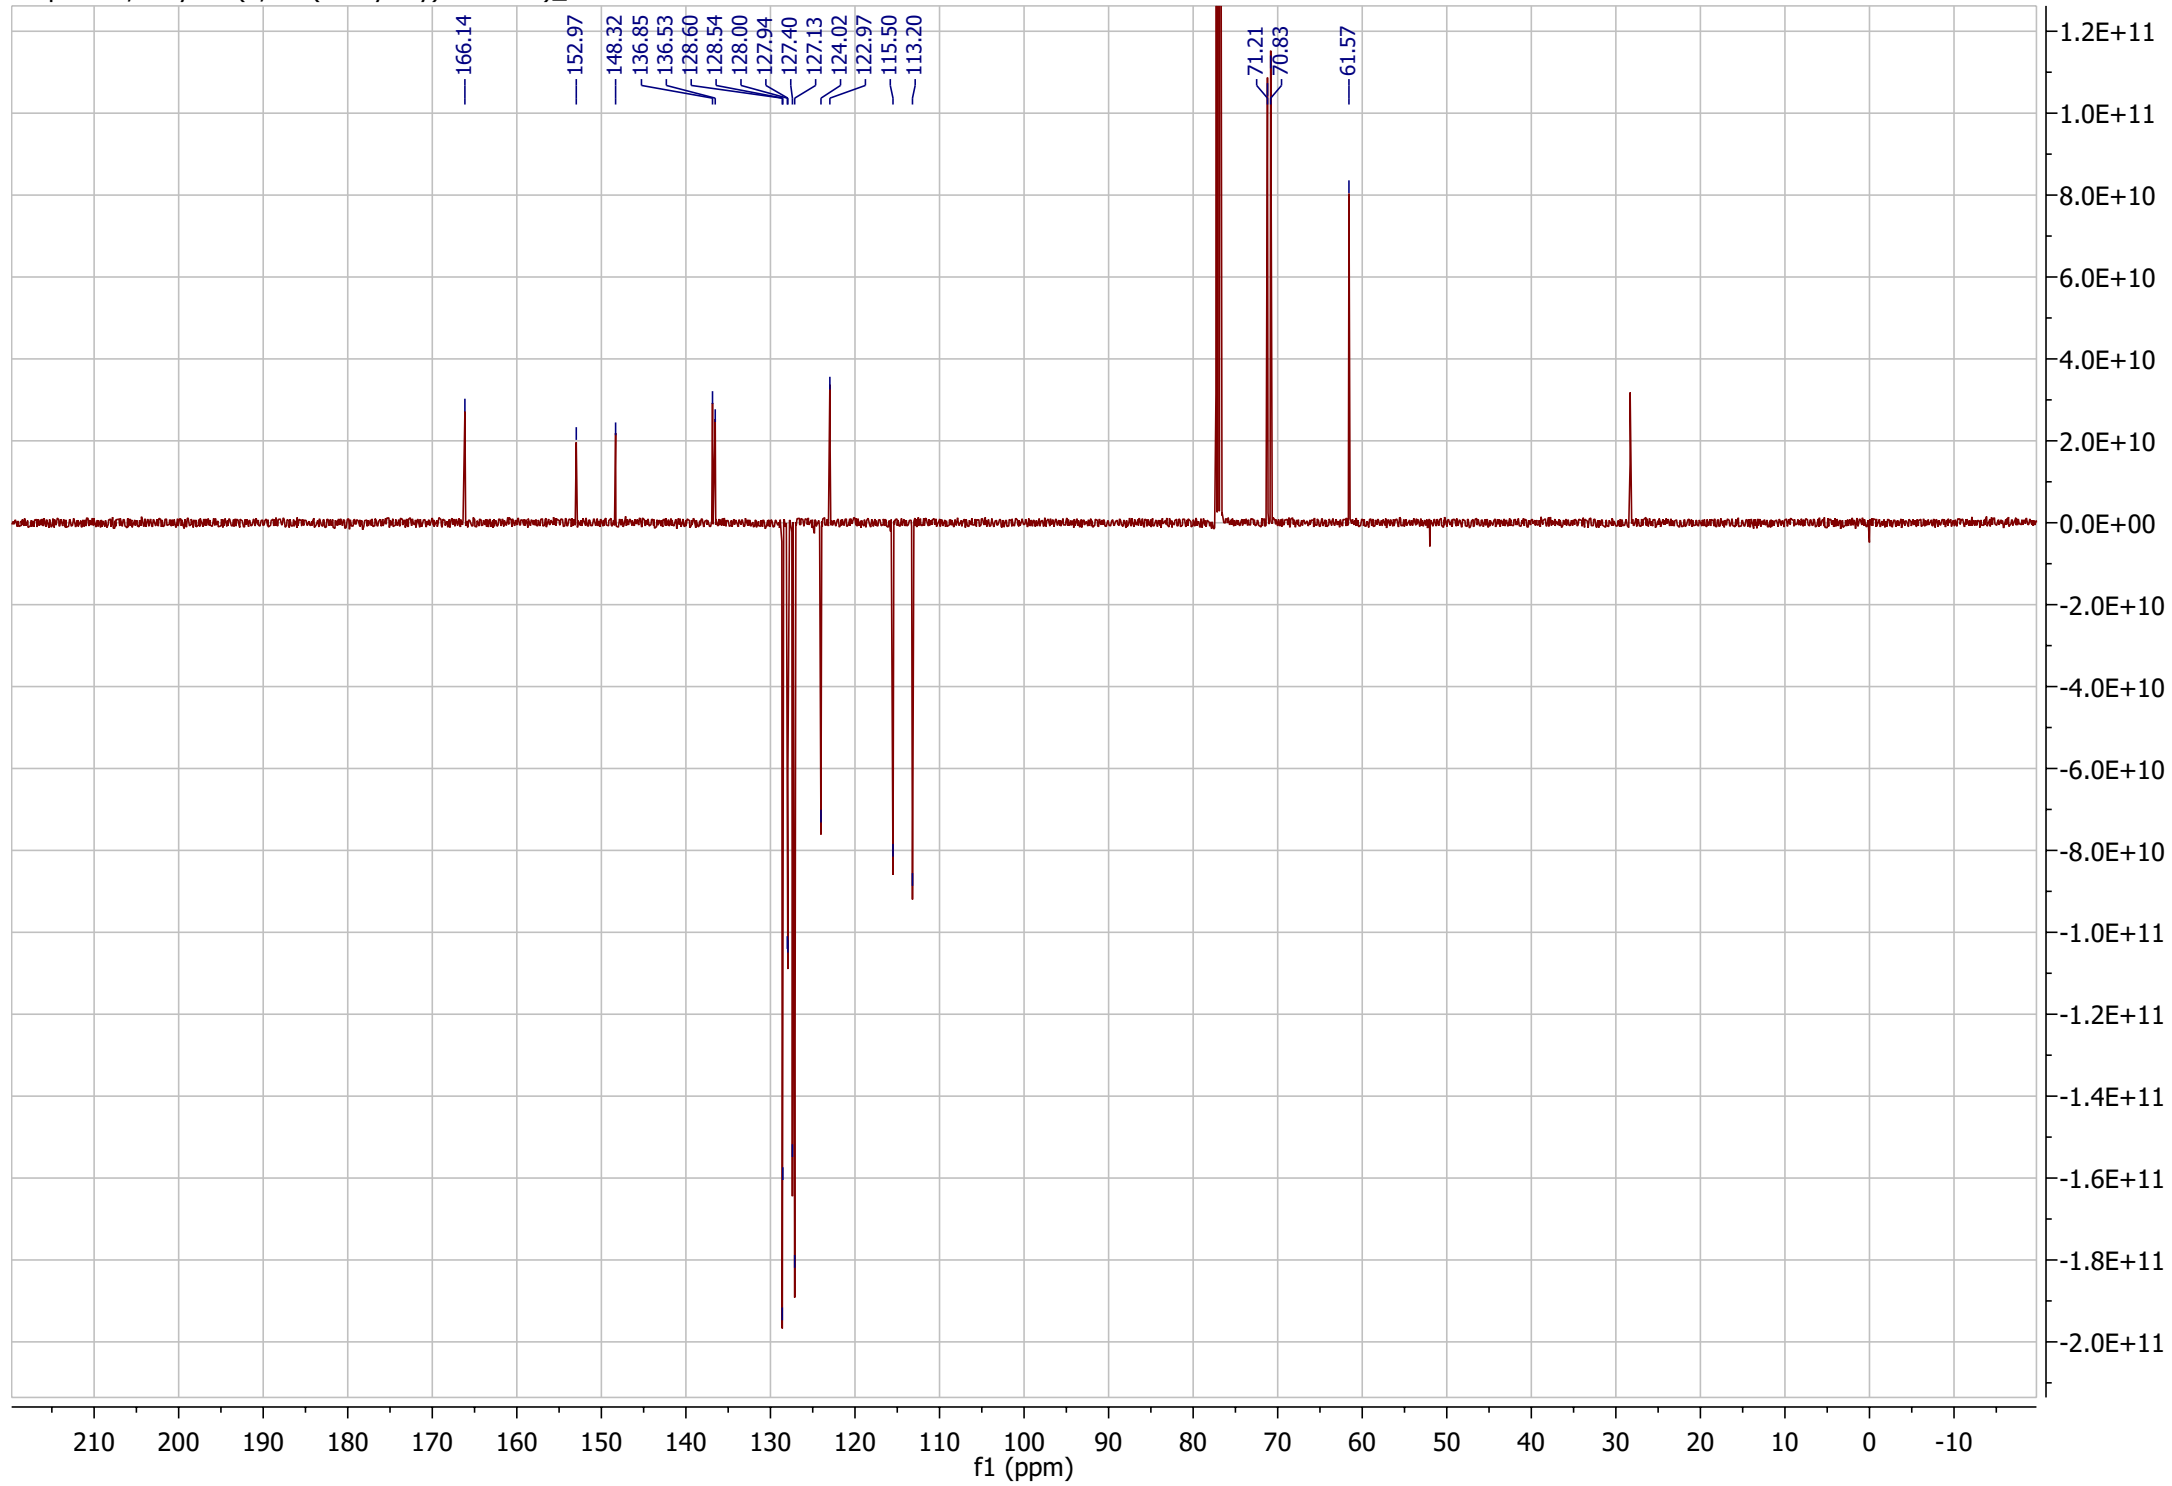

3-((3,5-bis(benzyloxy)benzoyl)oxy)propyl 3,4,5-tris(benzyloxy)benzoate\_CDCl3

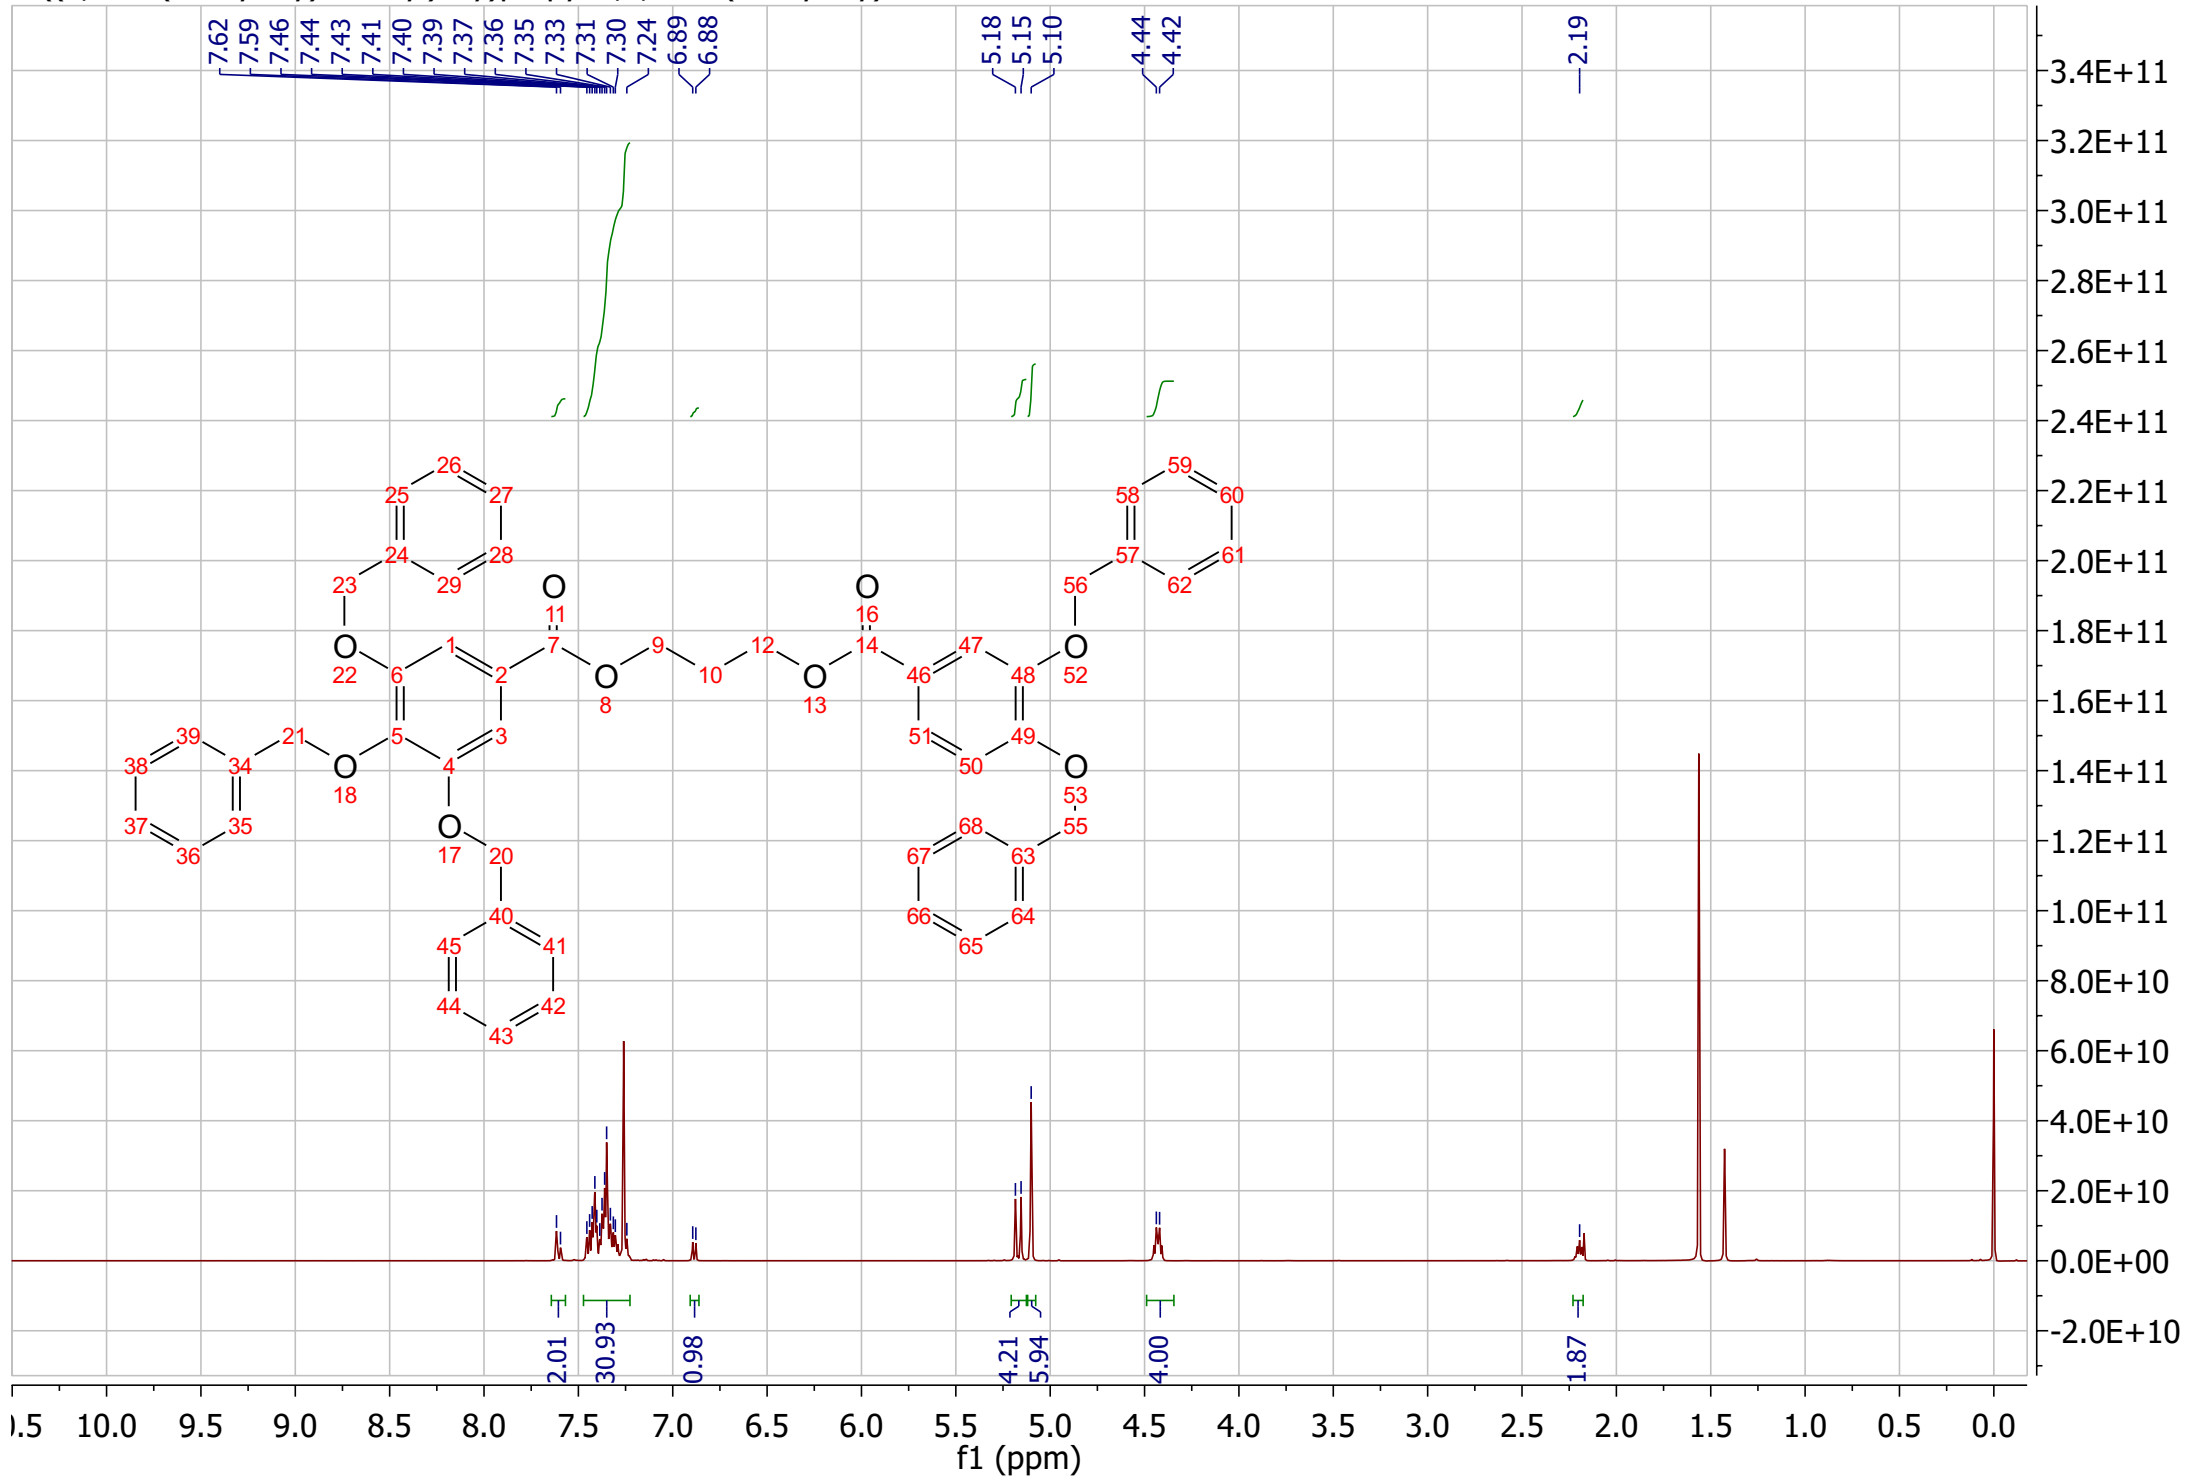

3-((3,5-bis(benzyloxy)benzoyl)oxy)propyl 3,4,5-tris(benzyloxy)benzoate\_CDCl3

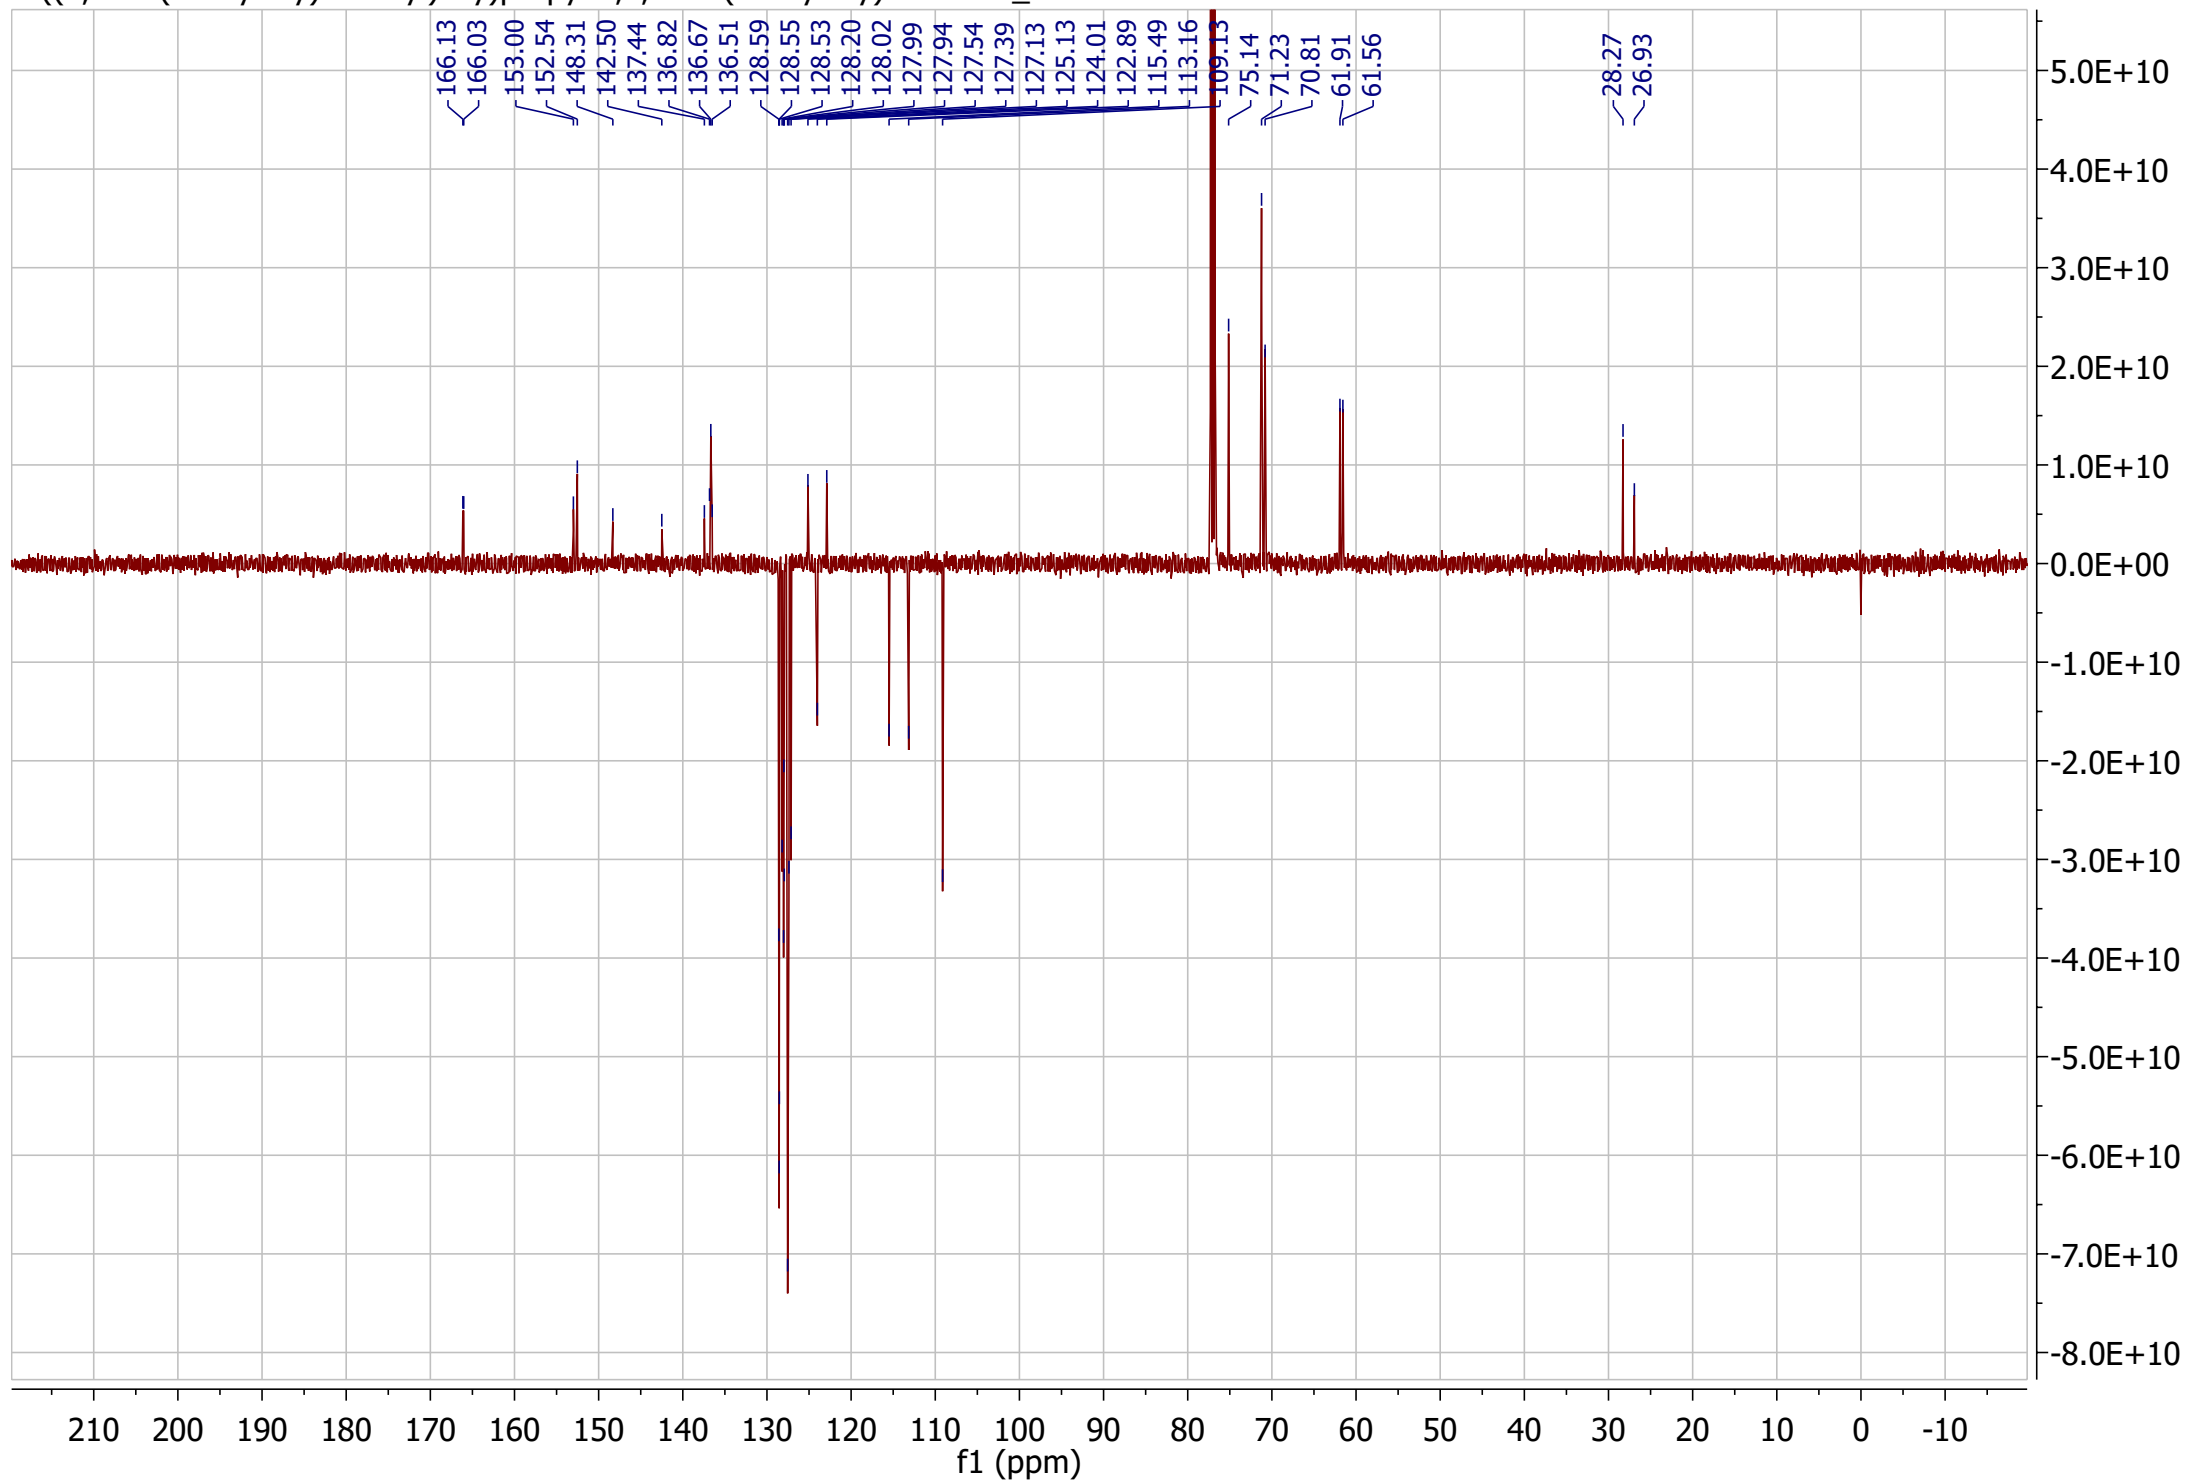

3-(benzyloxy)propyl 3,4,5-tris(benzyloxy)benzoate\_CDCl3

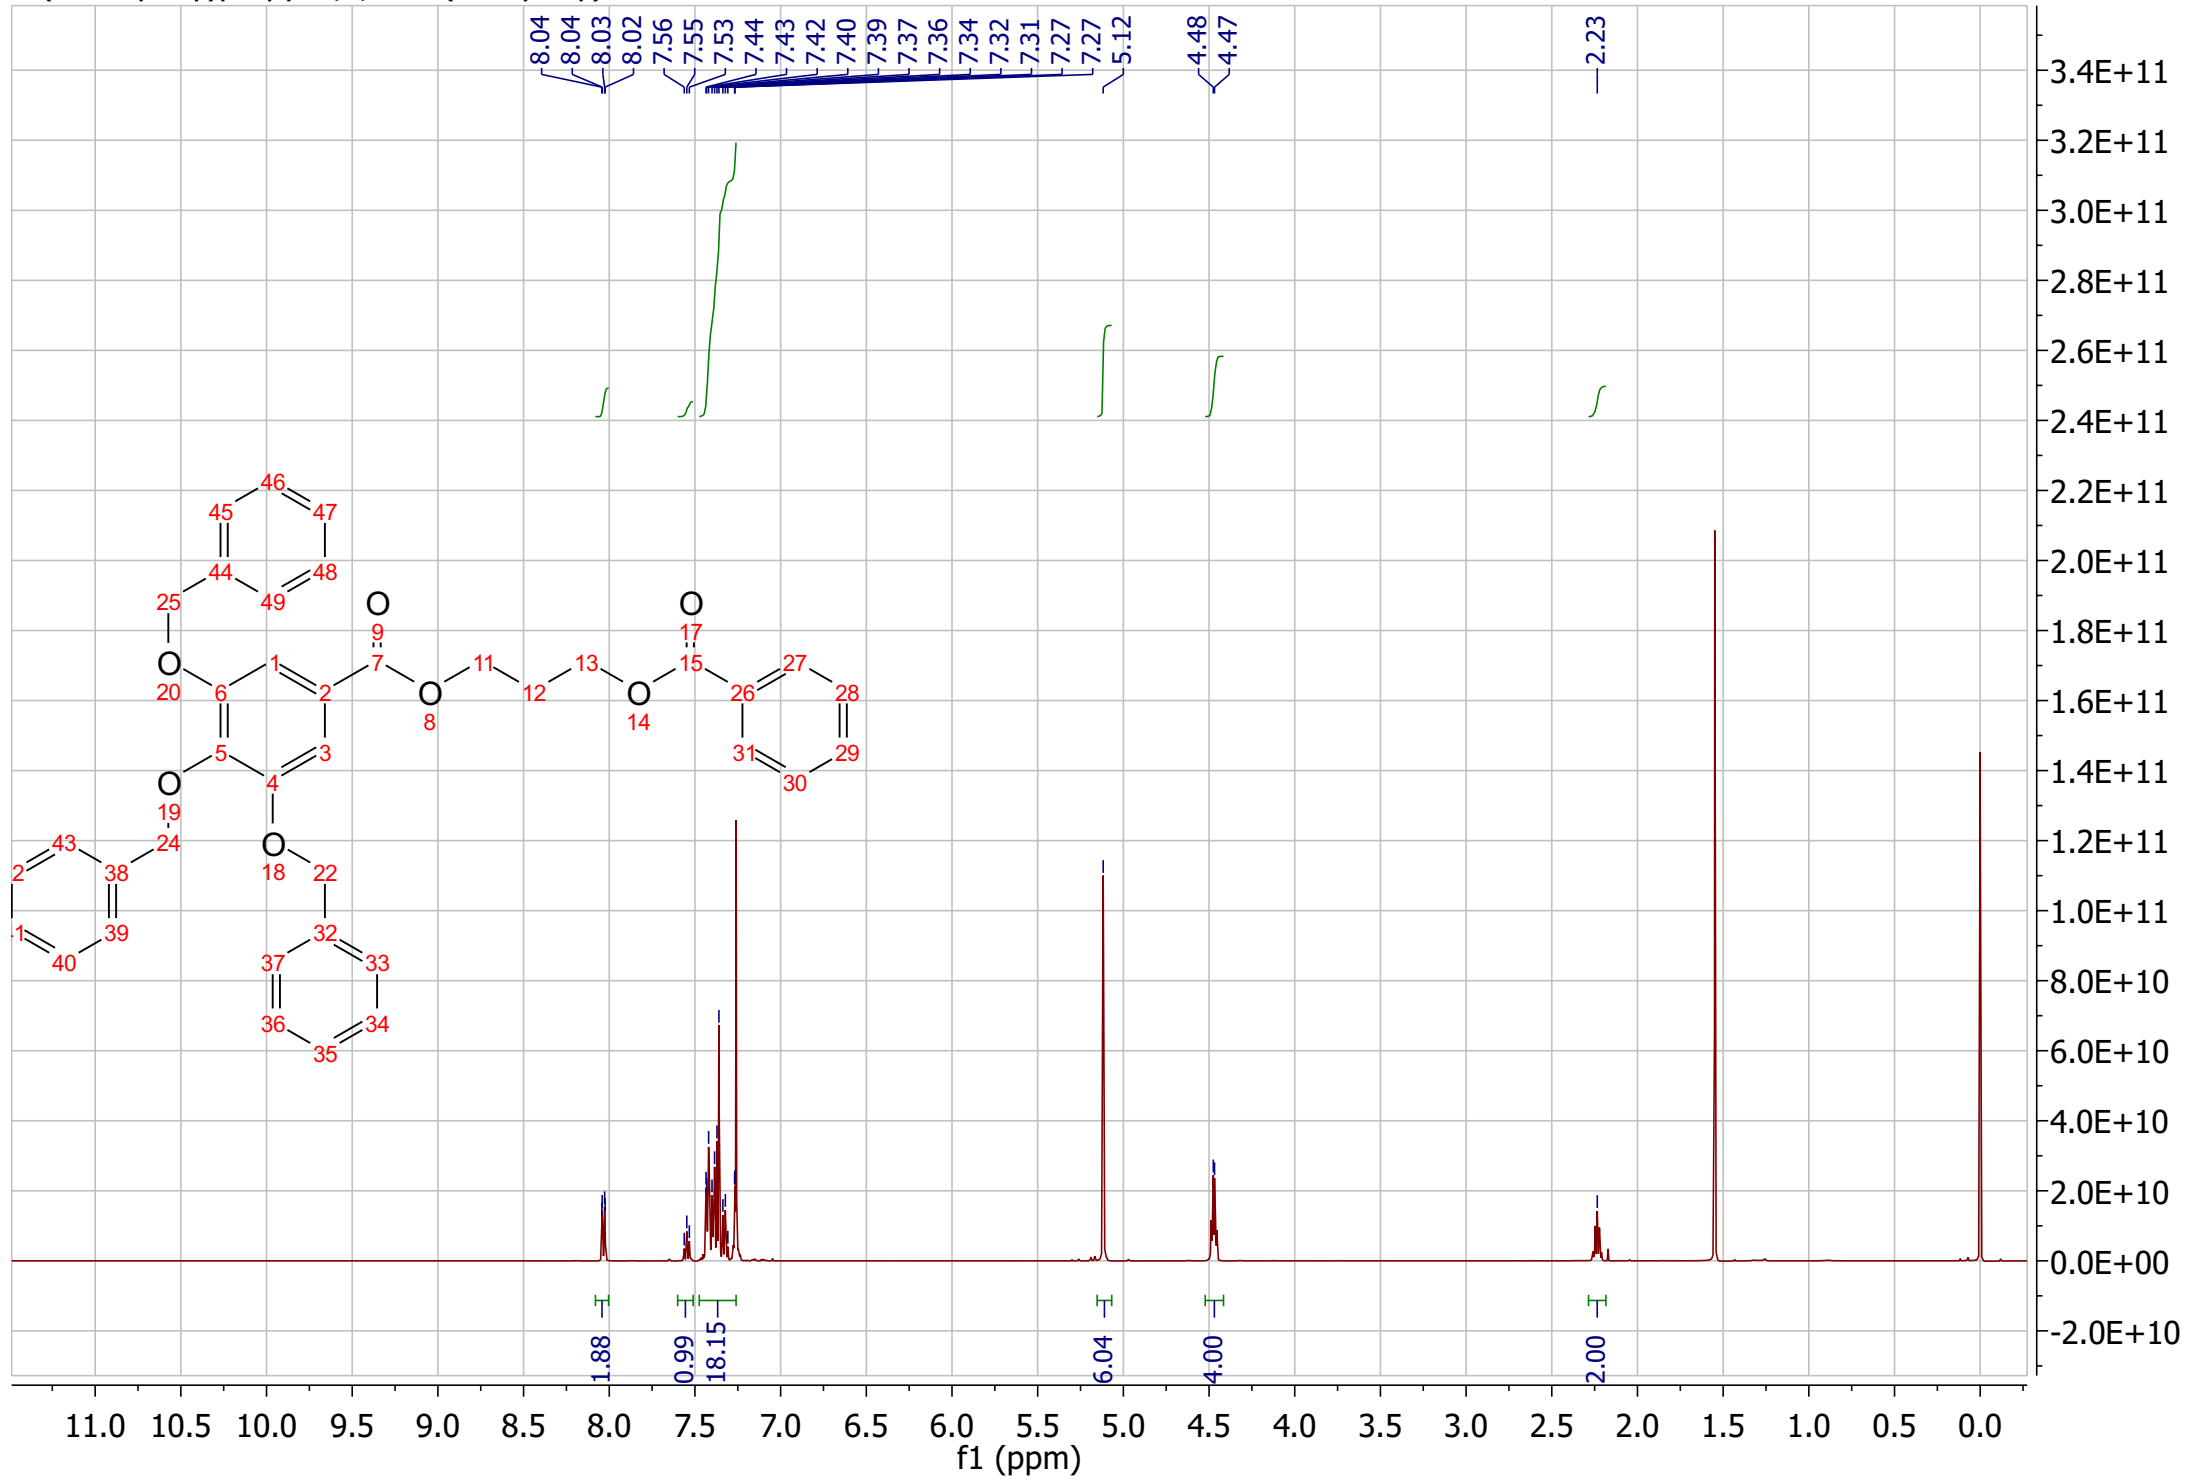

3-(benzyloxy)propyl 3,4,5-tris(benzyloxy)benzoate\_DMSO

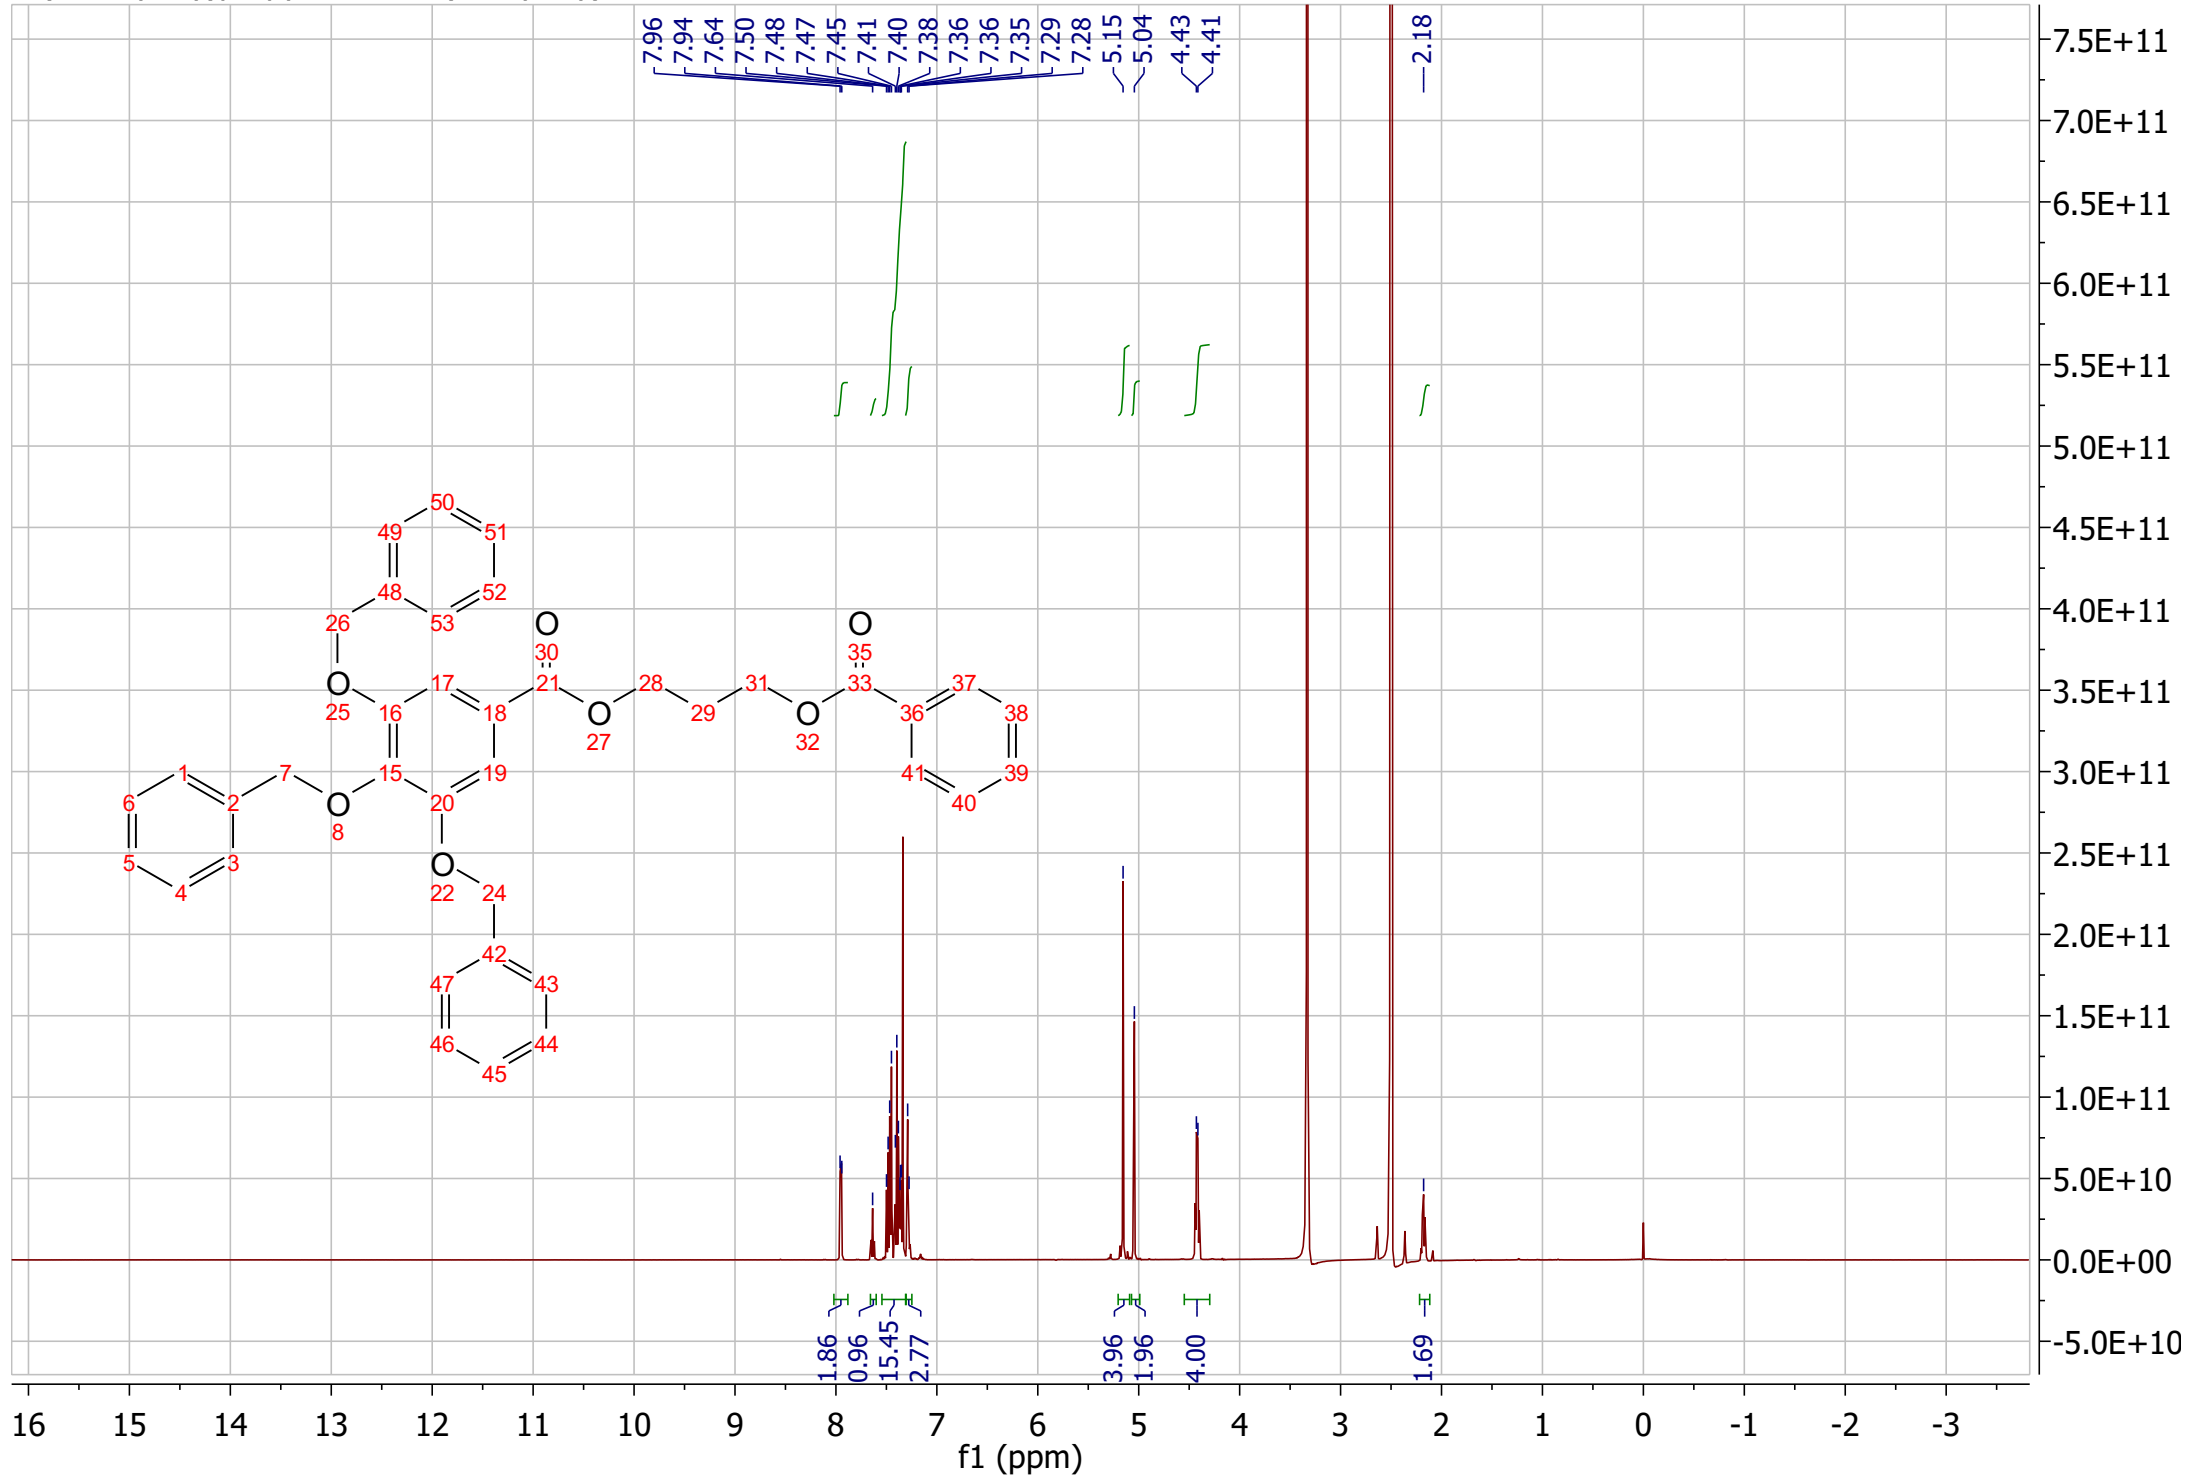

3-(benzyloxy)propyl 3,4,5-tris(benzyloxy)benzoate\_DMSO

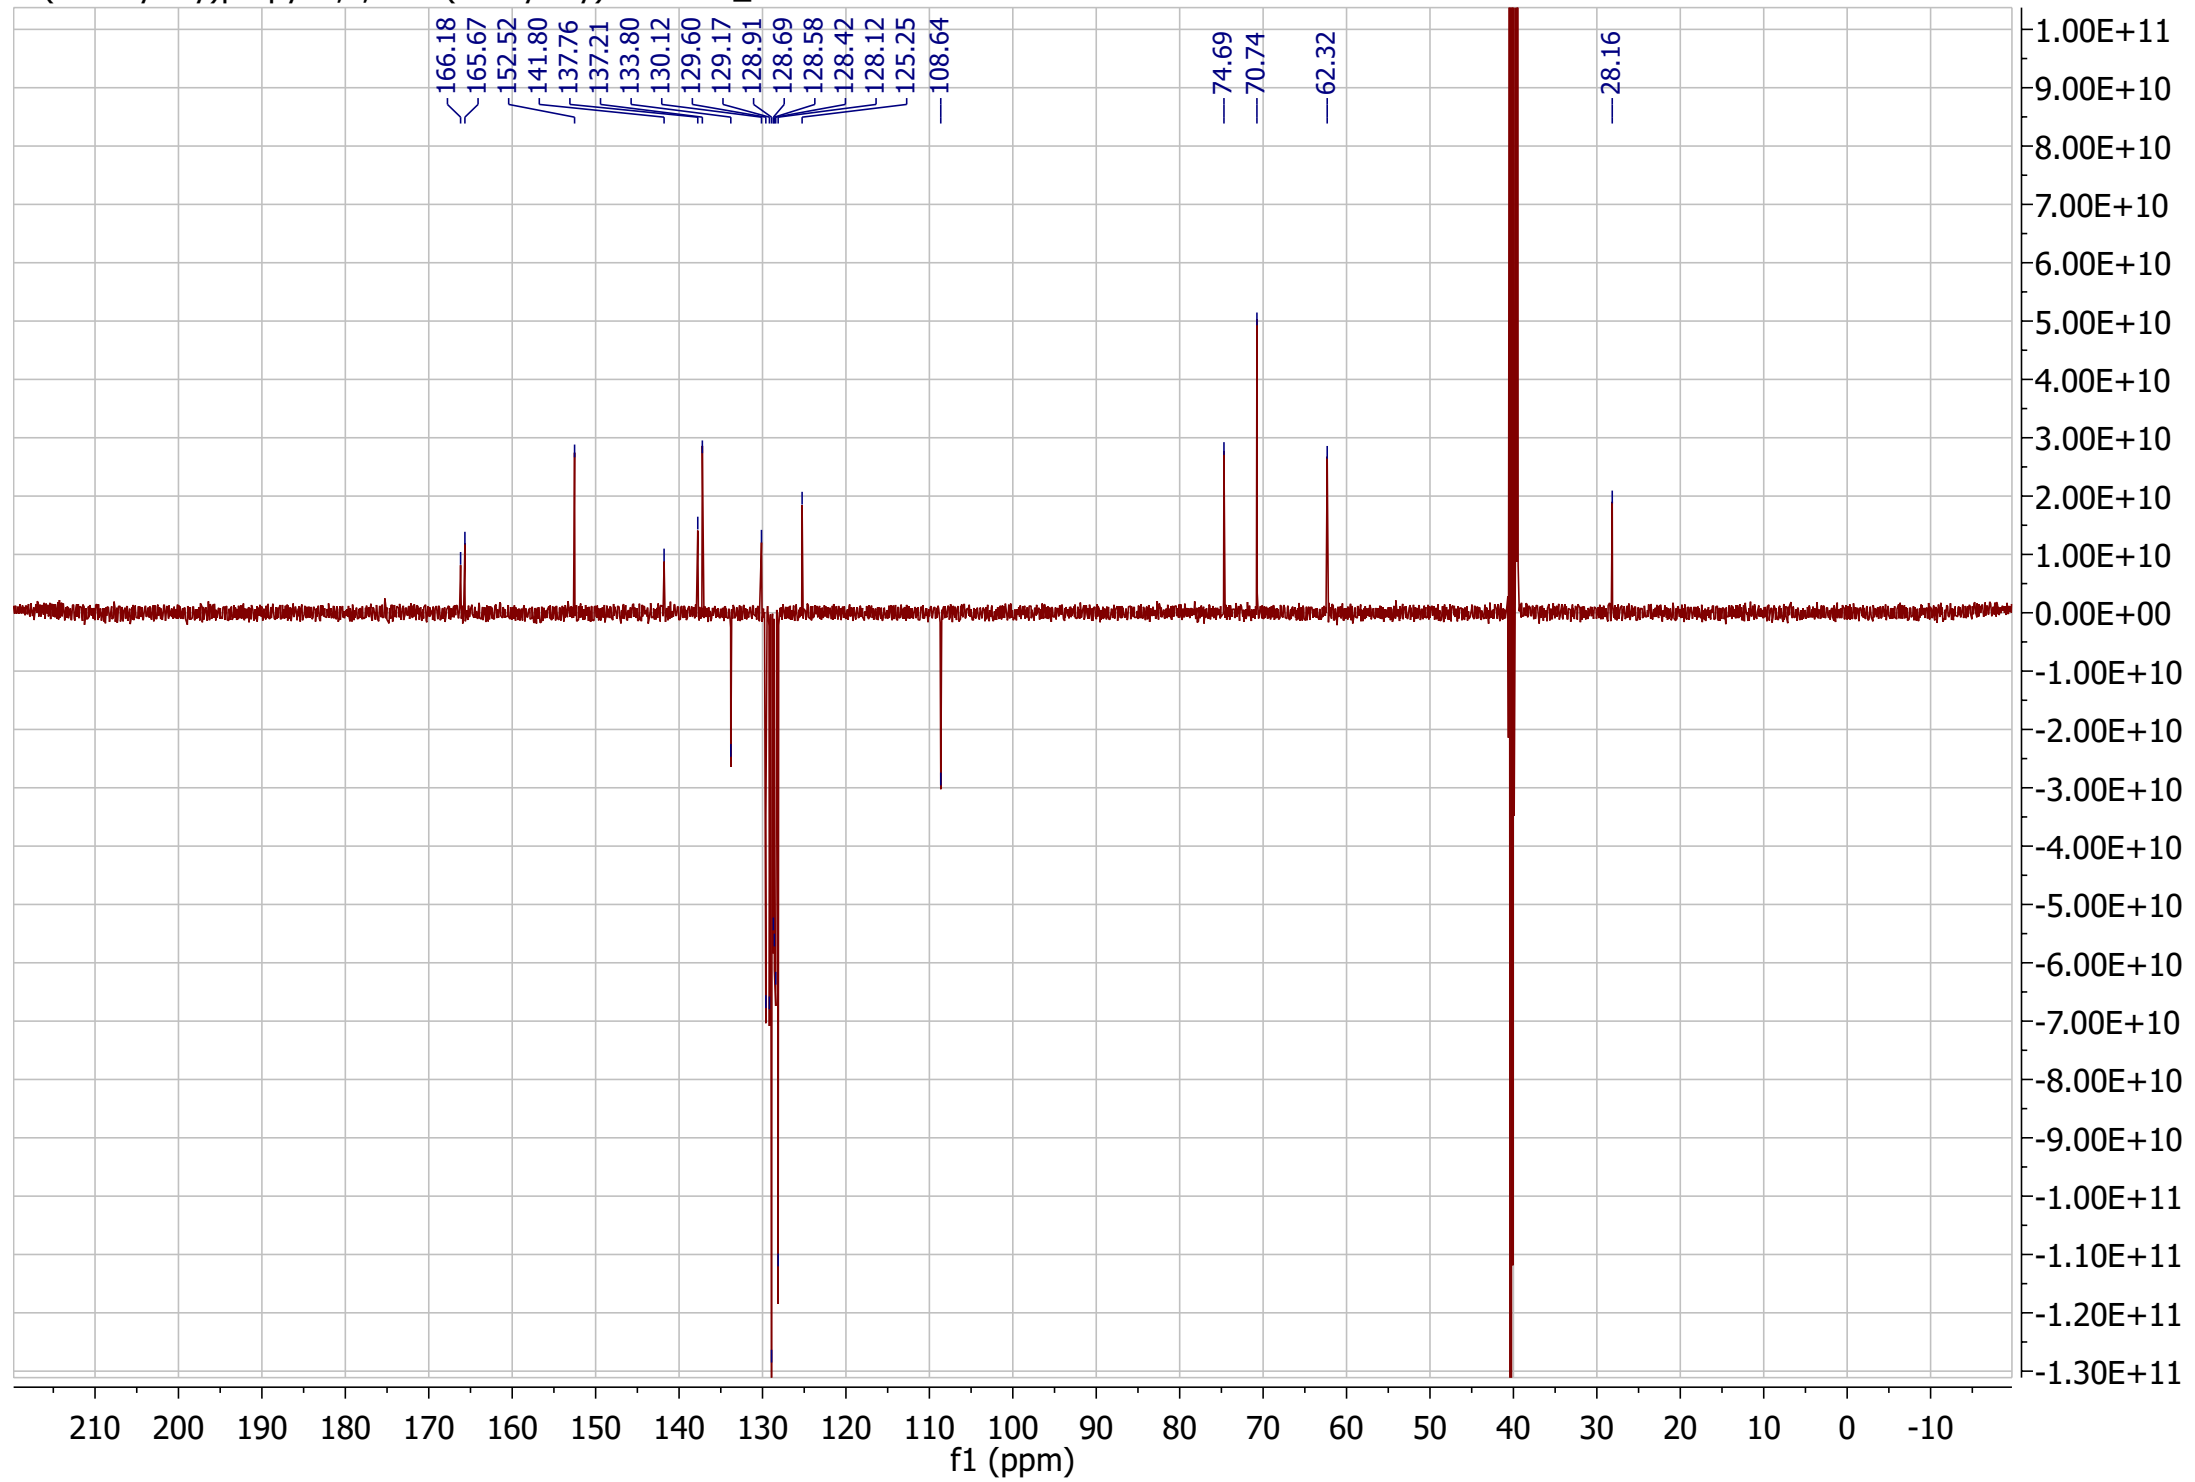

3-((3,5-bis(benzyloxy)benzoyl)oxy)propyl 3,4,5-tris(benzyloxy)benzoate\_DMSO

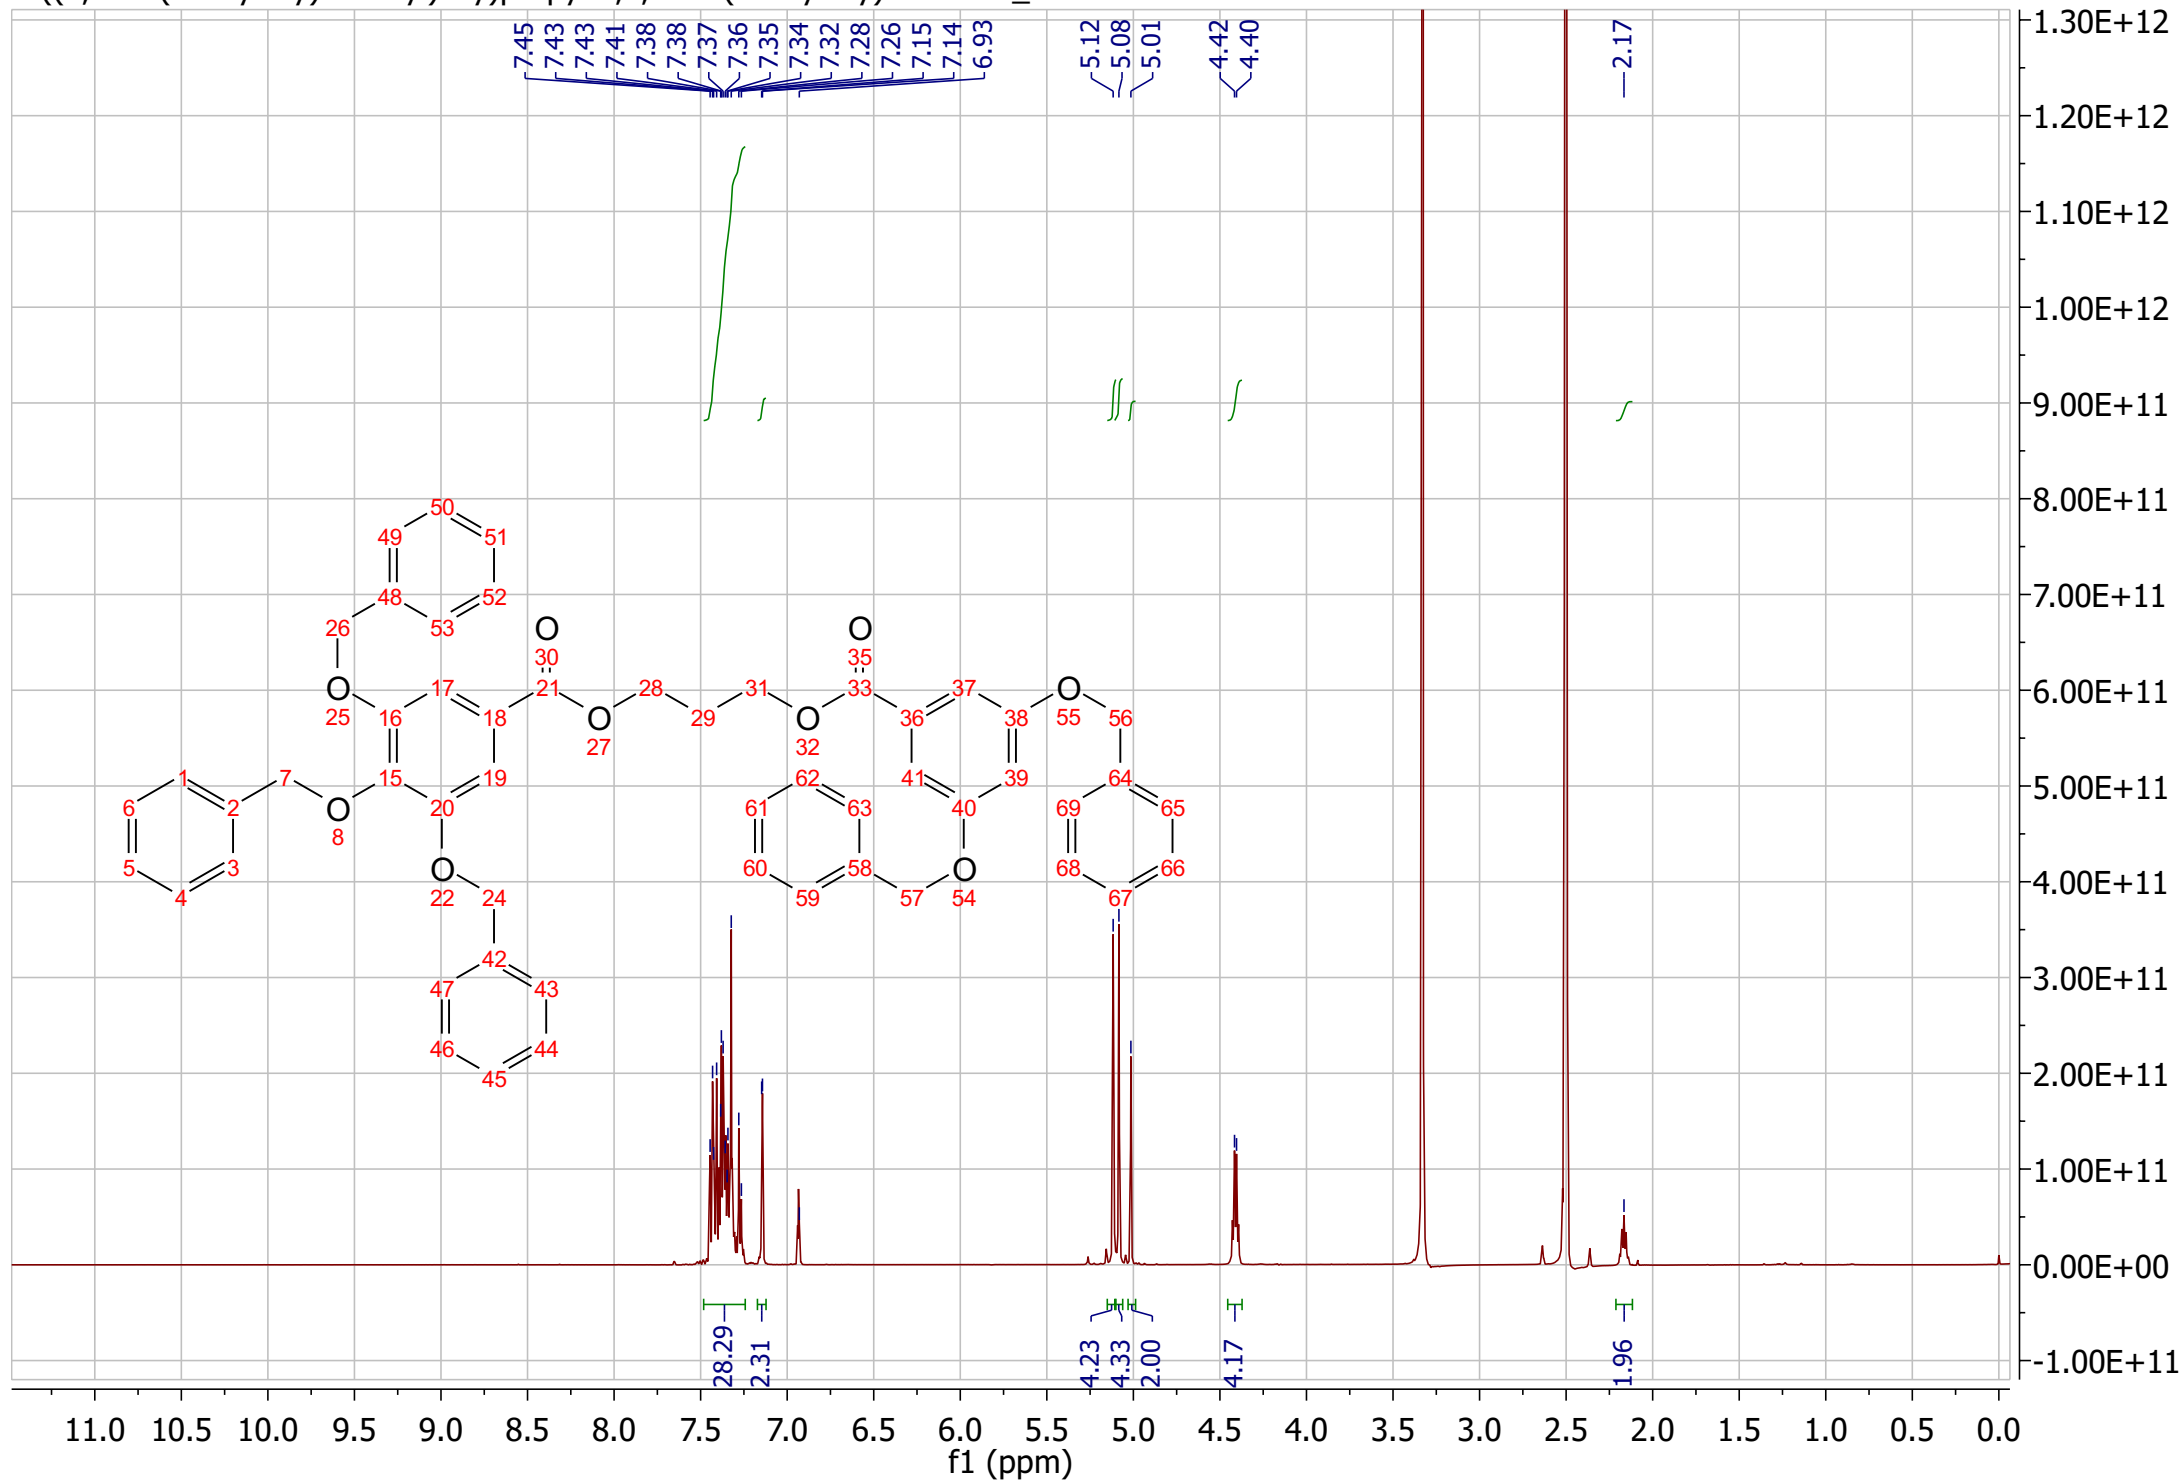

3-((3,5-bis(benzyloxy)benzoyl)oxy)propyl 3,4,5-tris(benzyloxy)benzoate\_DMSO

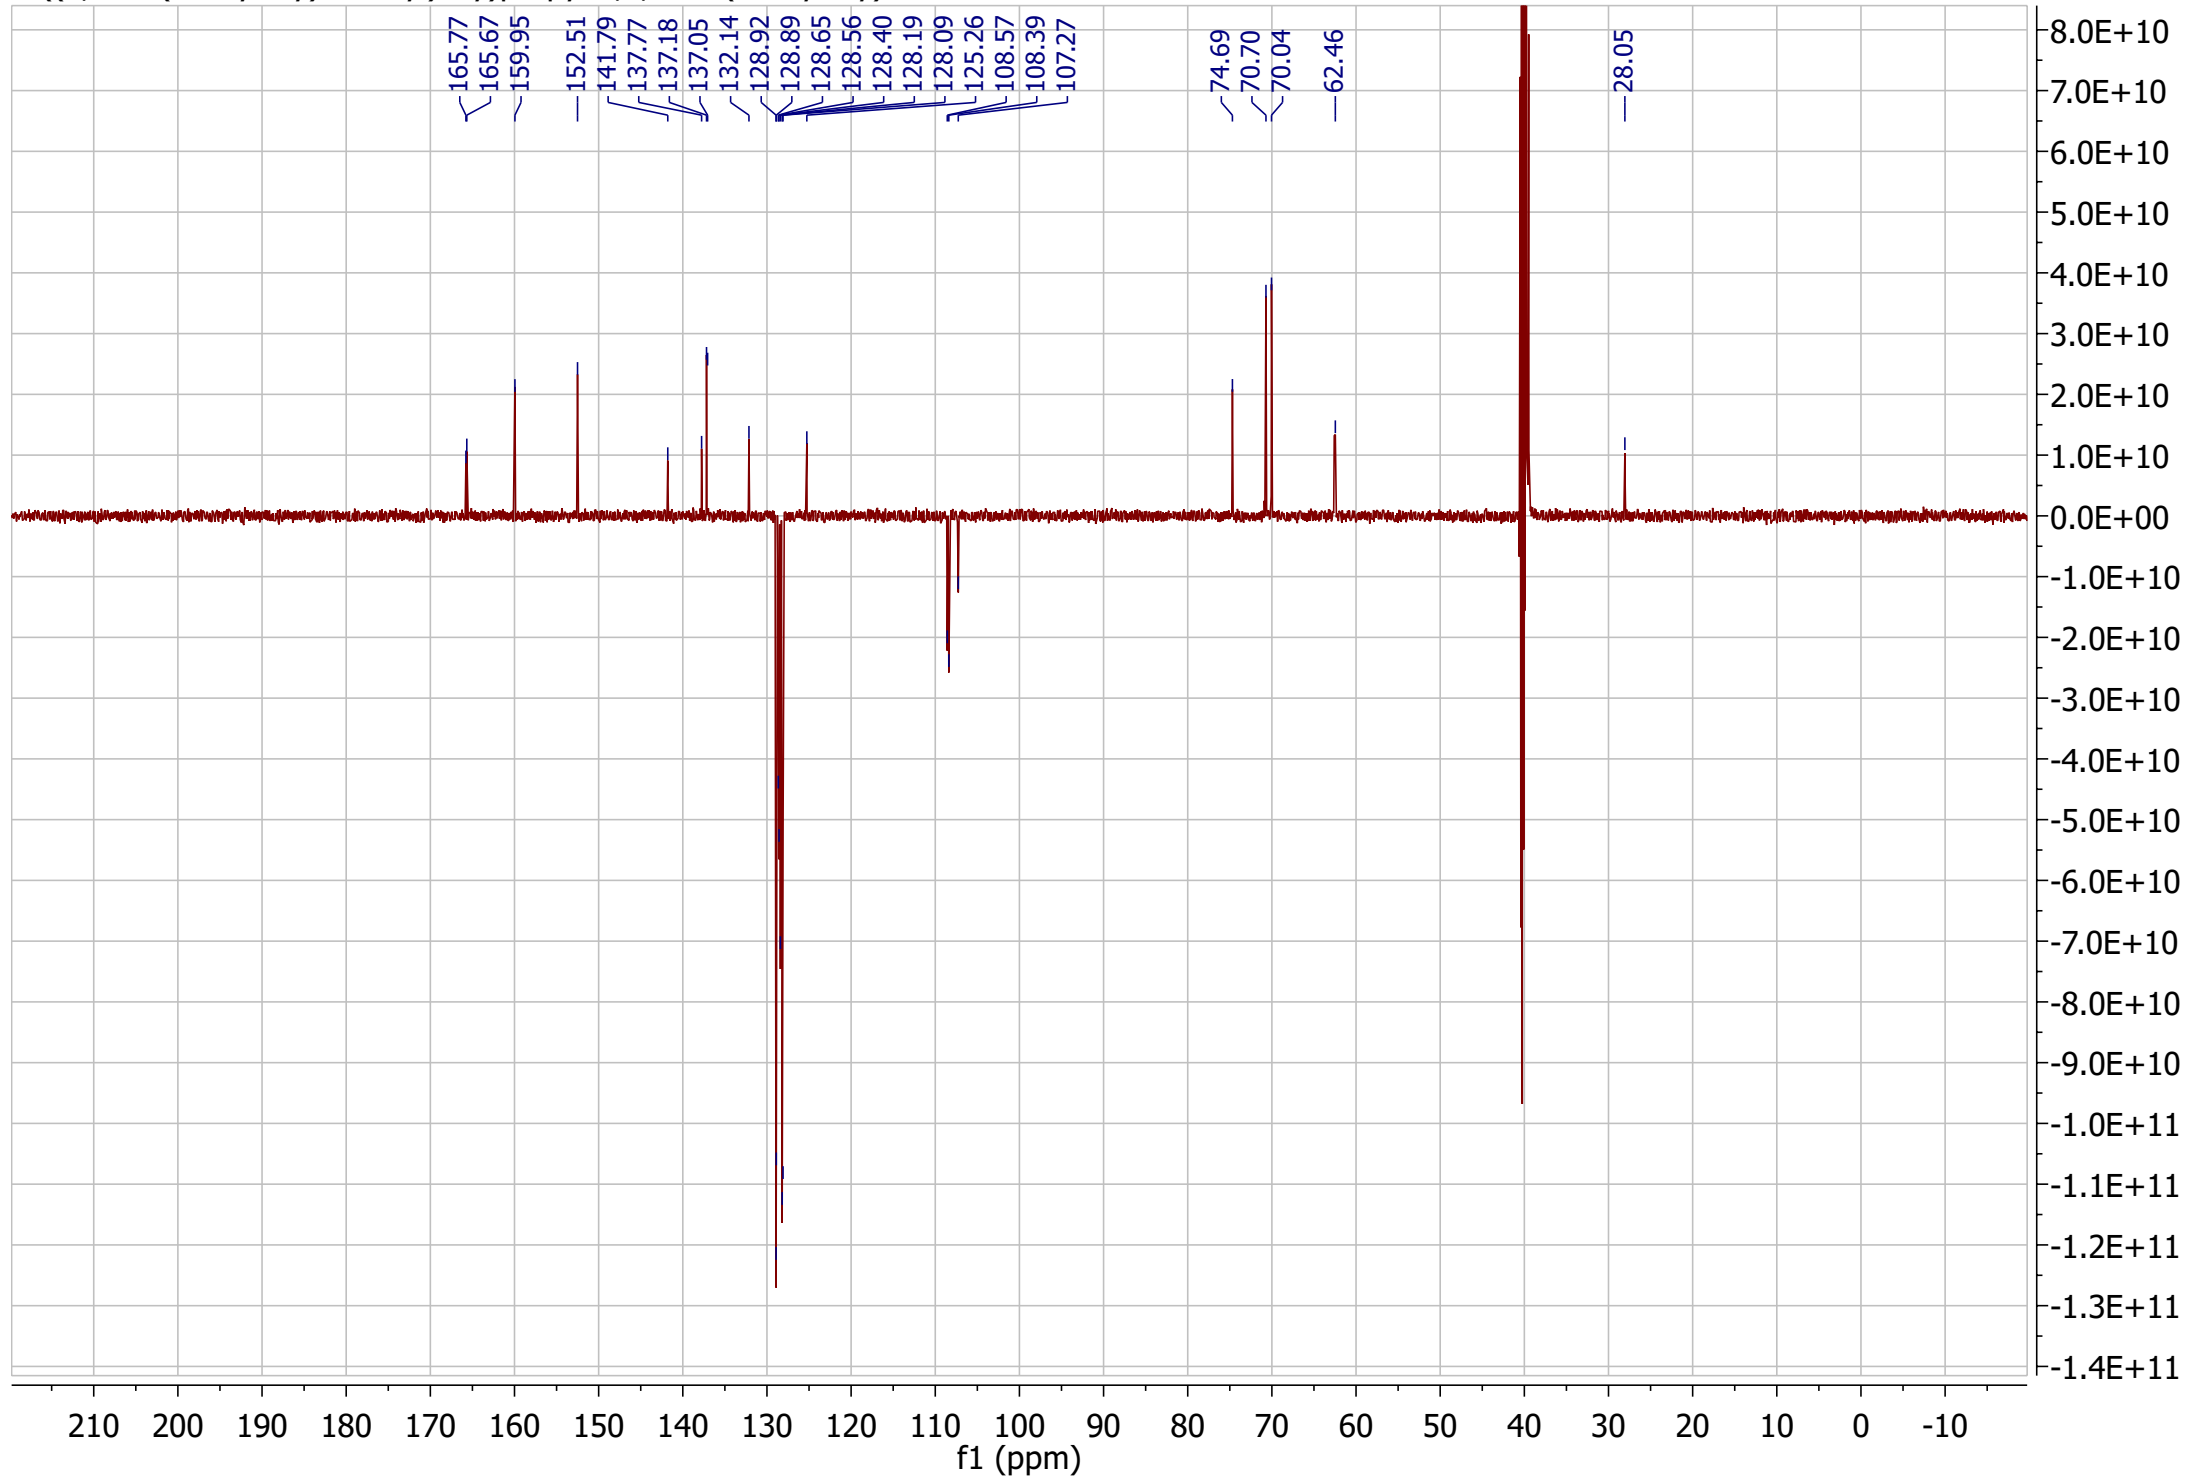



3-(3,4,5-tris(benzyloxy)benzamido)propyl 3,4,5-tris(benzyloxy)benzoate\_DMSO

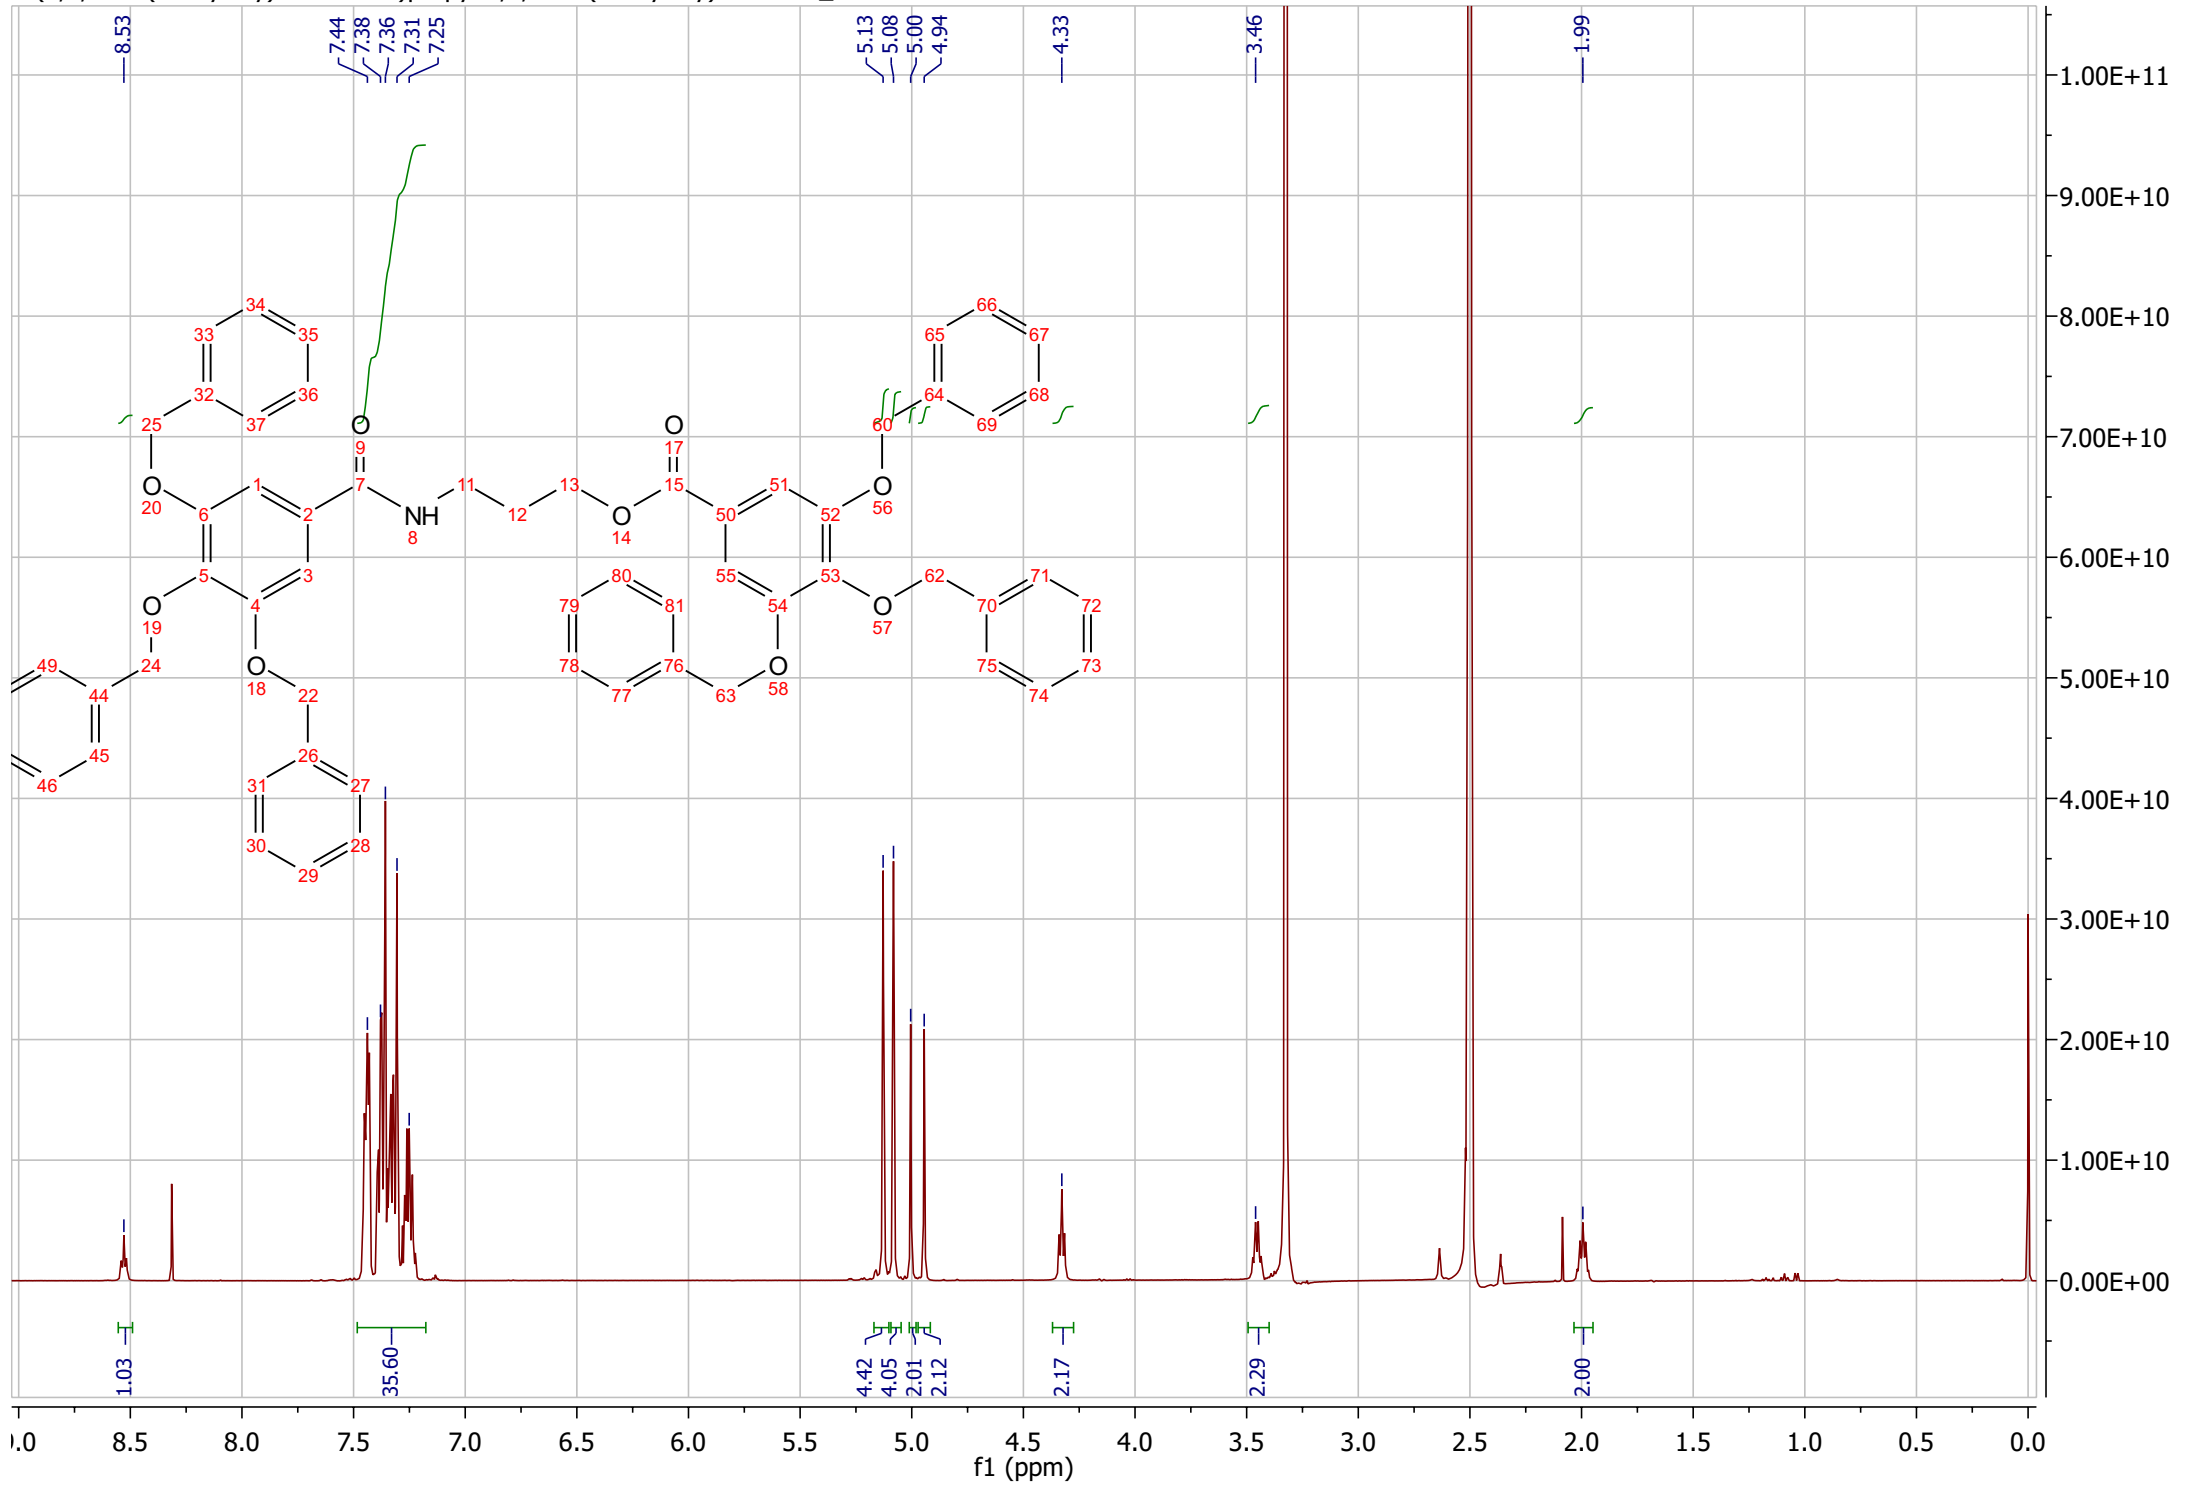

3-(3,4,5-tris(benzyloxy)benzamido)propyl 3,4,5-tris(benzyloxy)benzoate\_DMSO

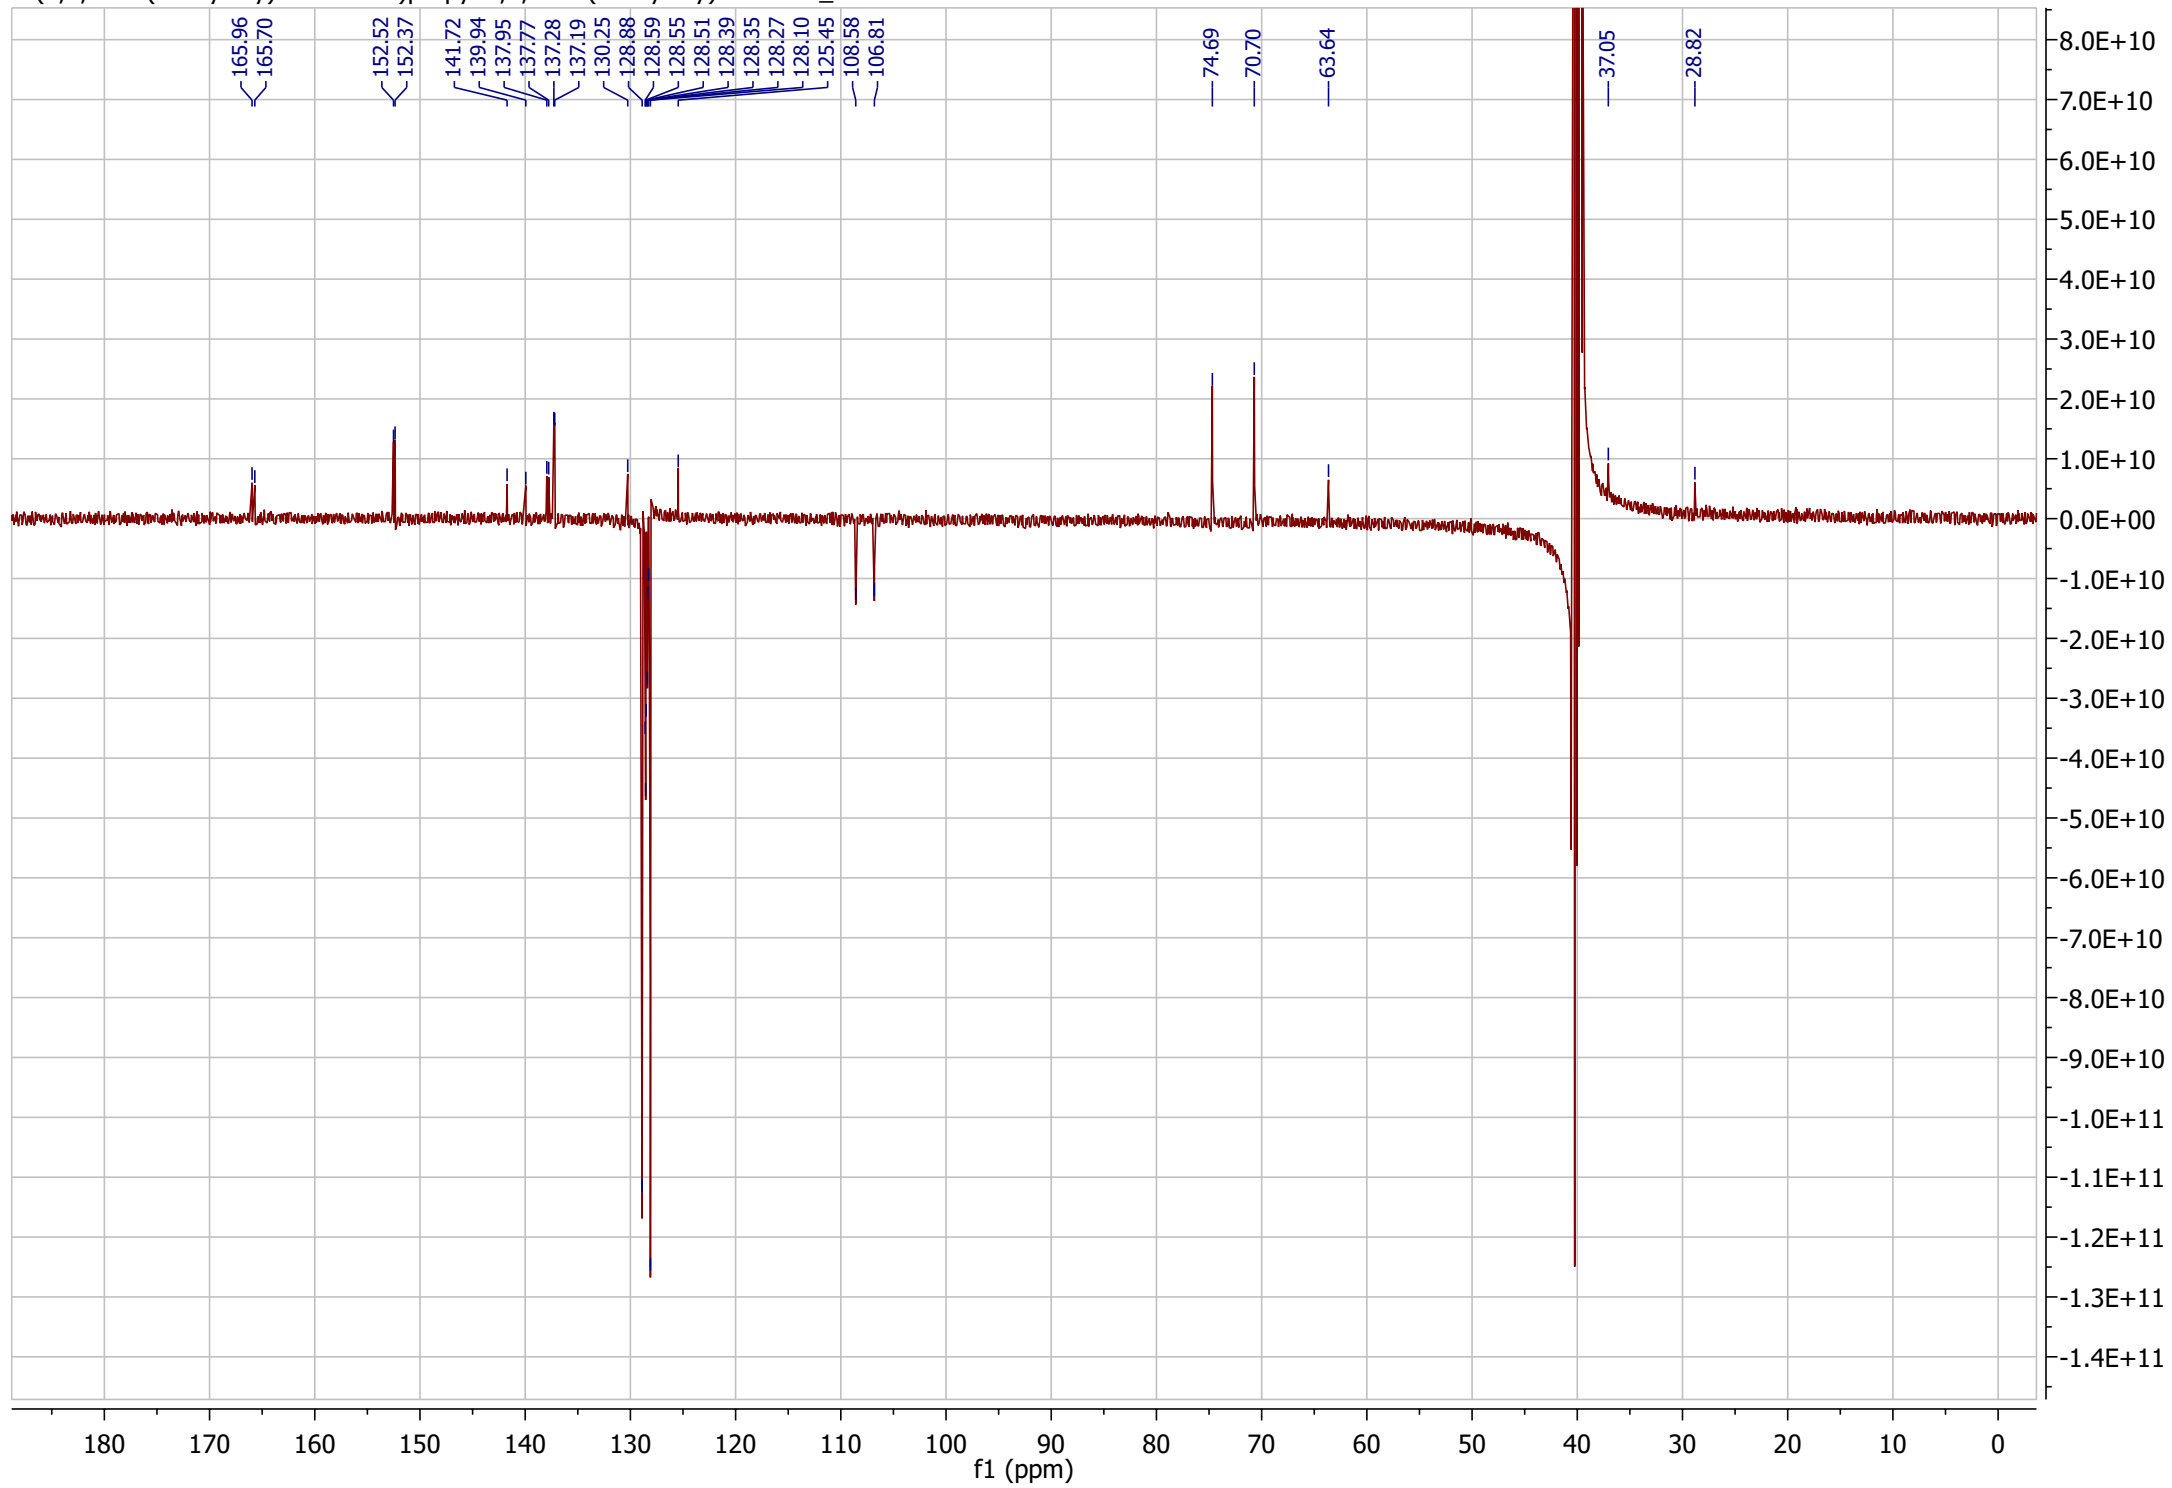

4-(3,4,5-tris(benzyloxy)benzamido)phenyl 3,4,5-tris(benzyloxy)benzoate\_CDCl3

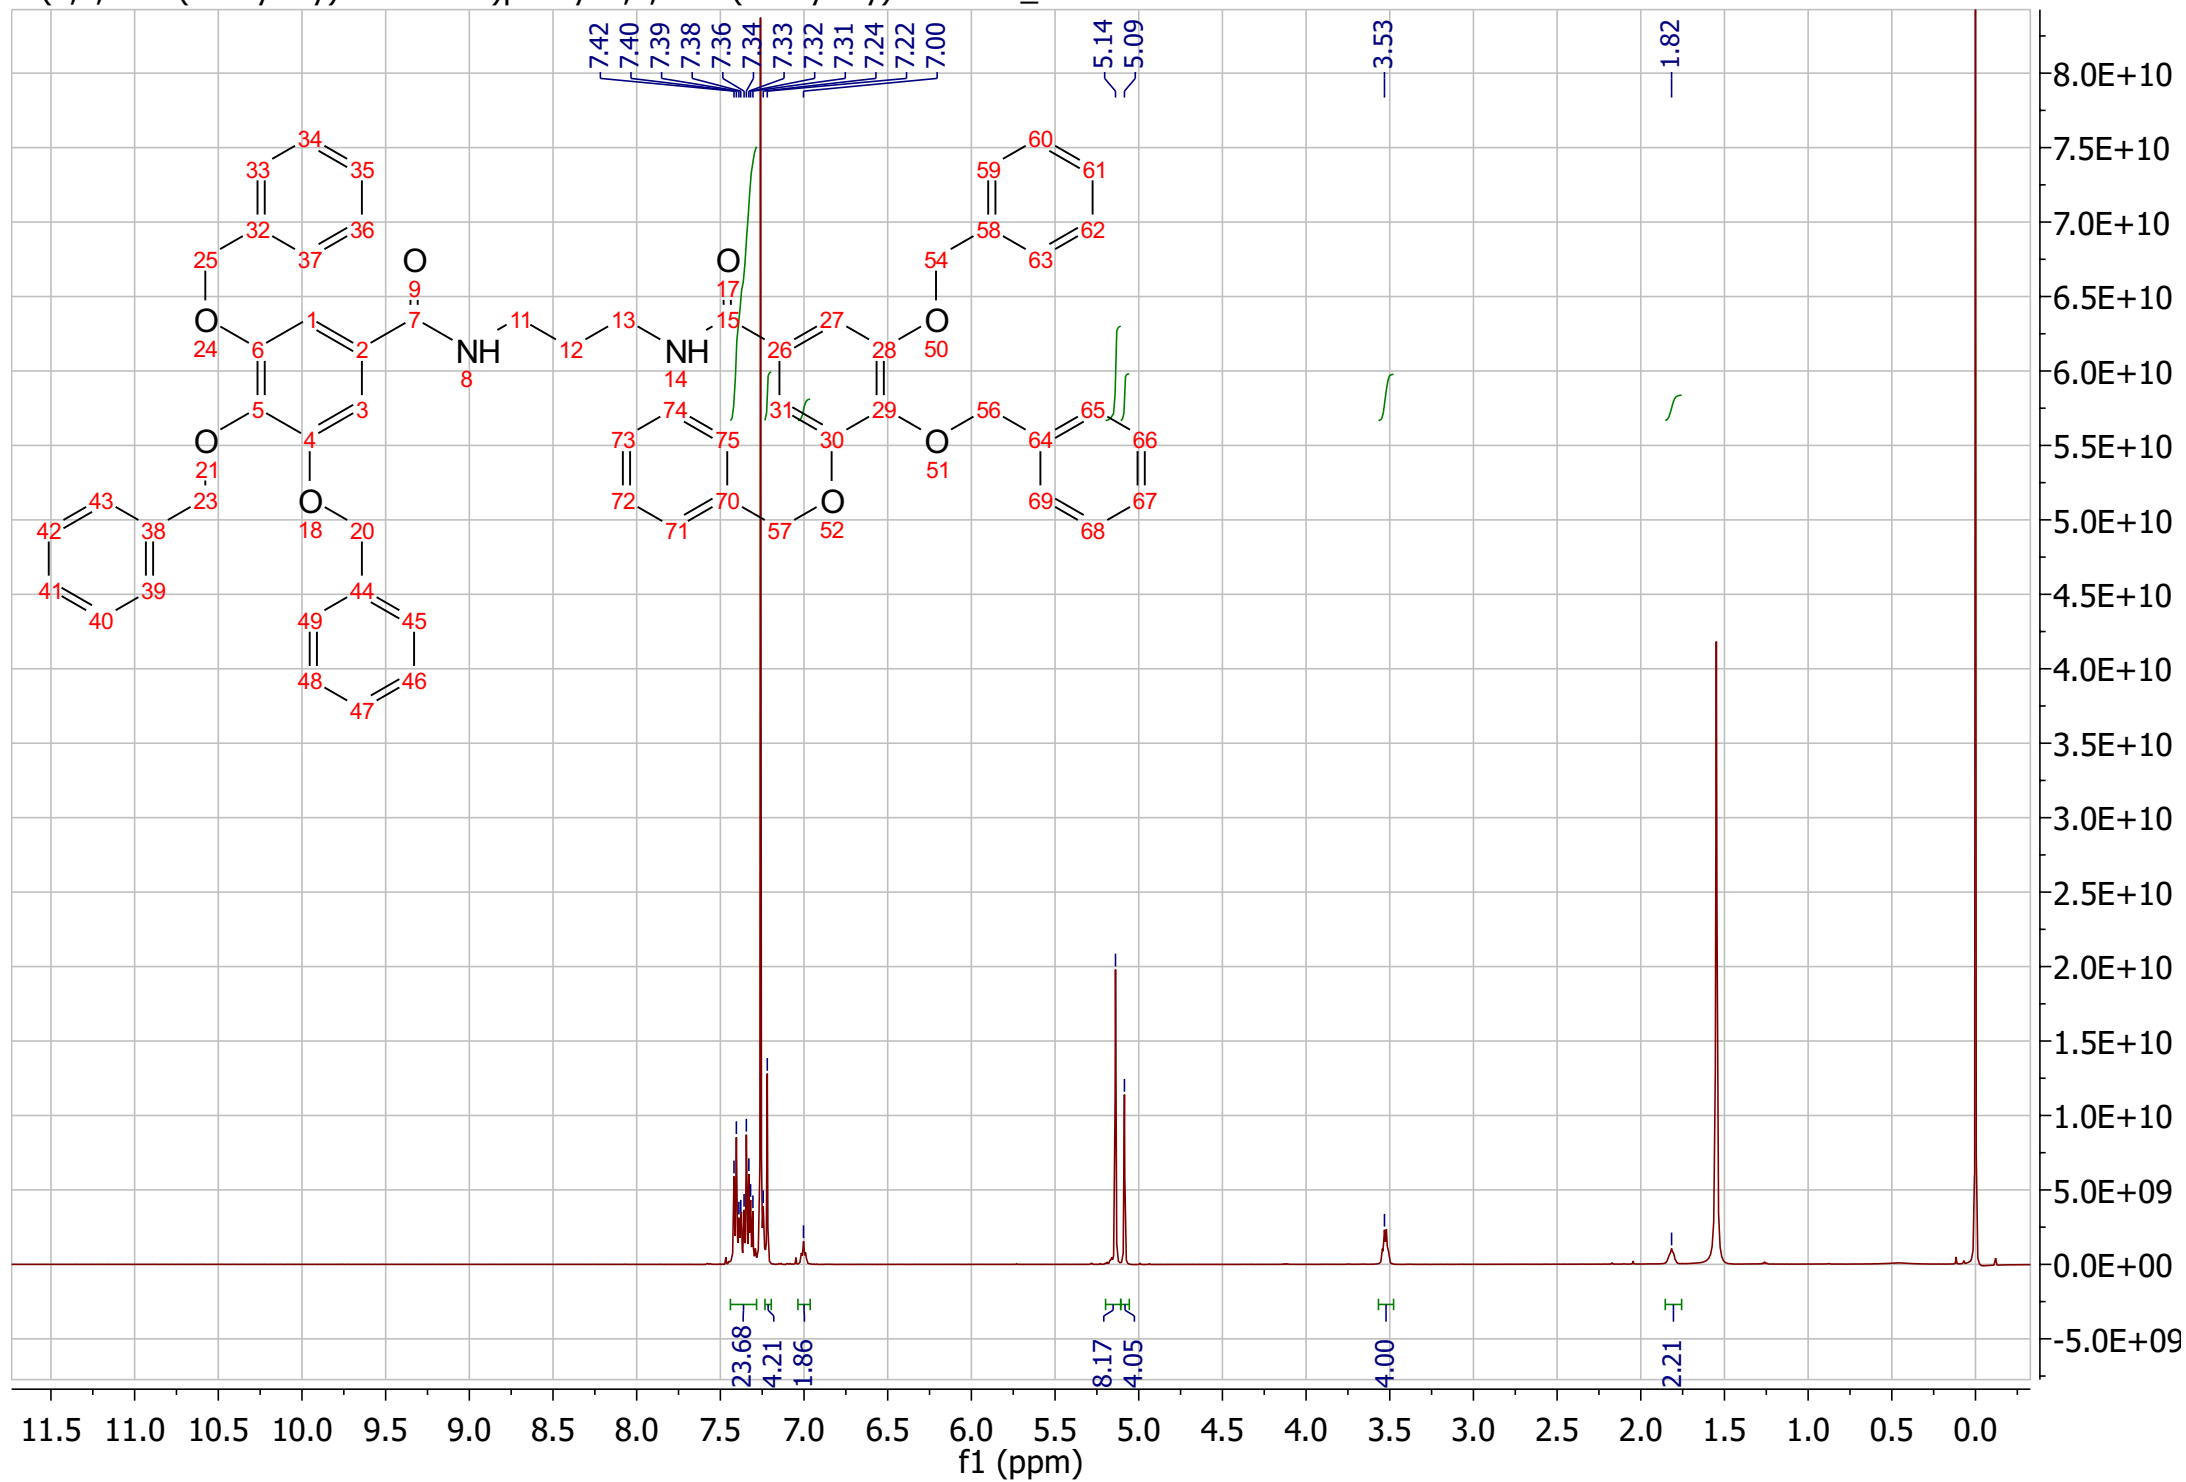

4-(3,4,5-tris(benzyloxy)benzamido)phenyl 3,4,5-tris(benzyloxy)benzoate\_CDCl3

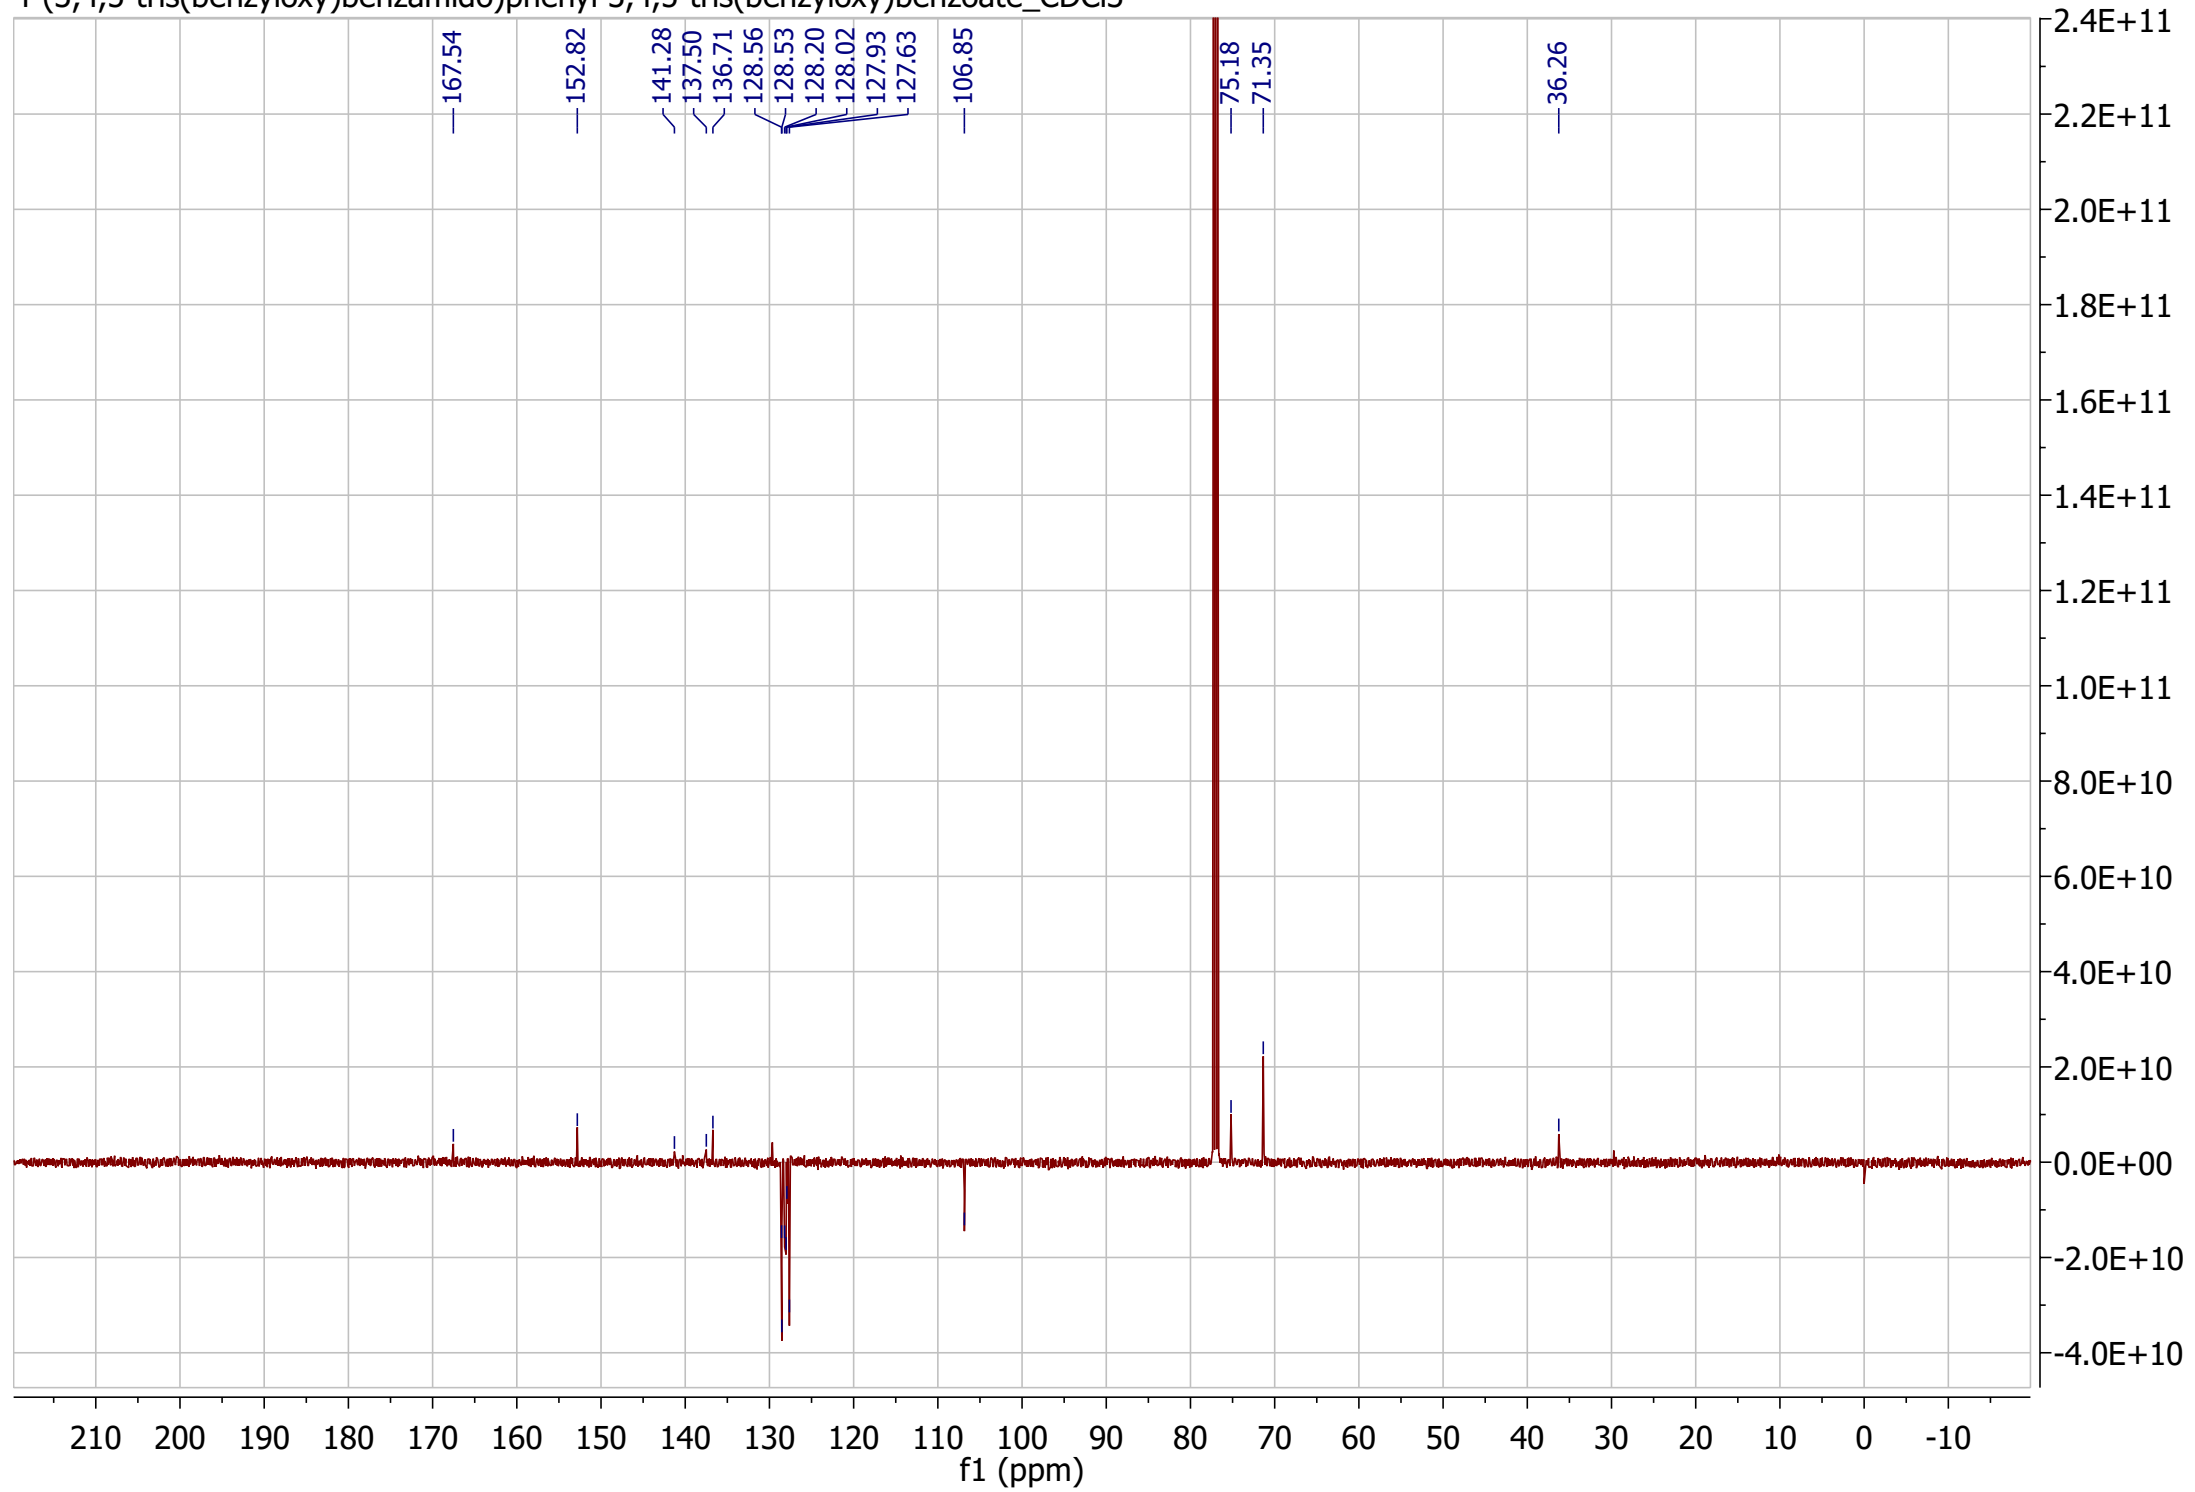

3-(3,4,5-trihydroxybenzamido)phenyl 3,4,5-trihydroxybenzoate\_DMSO

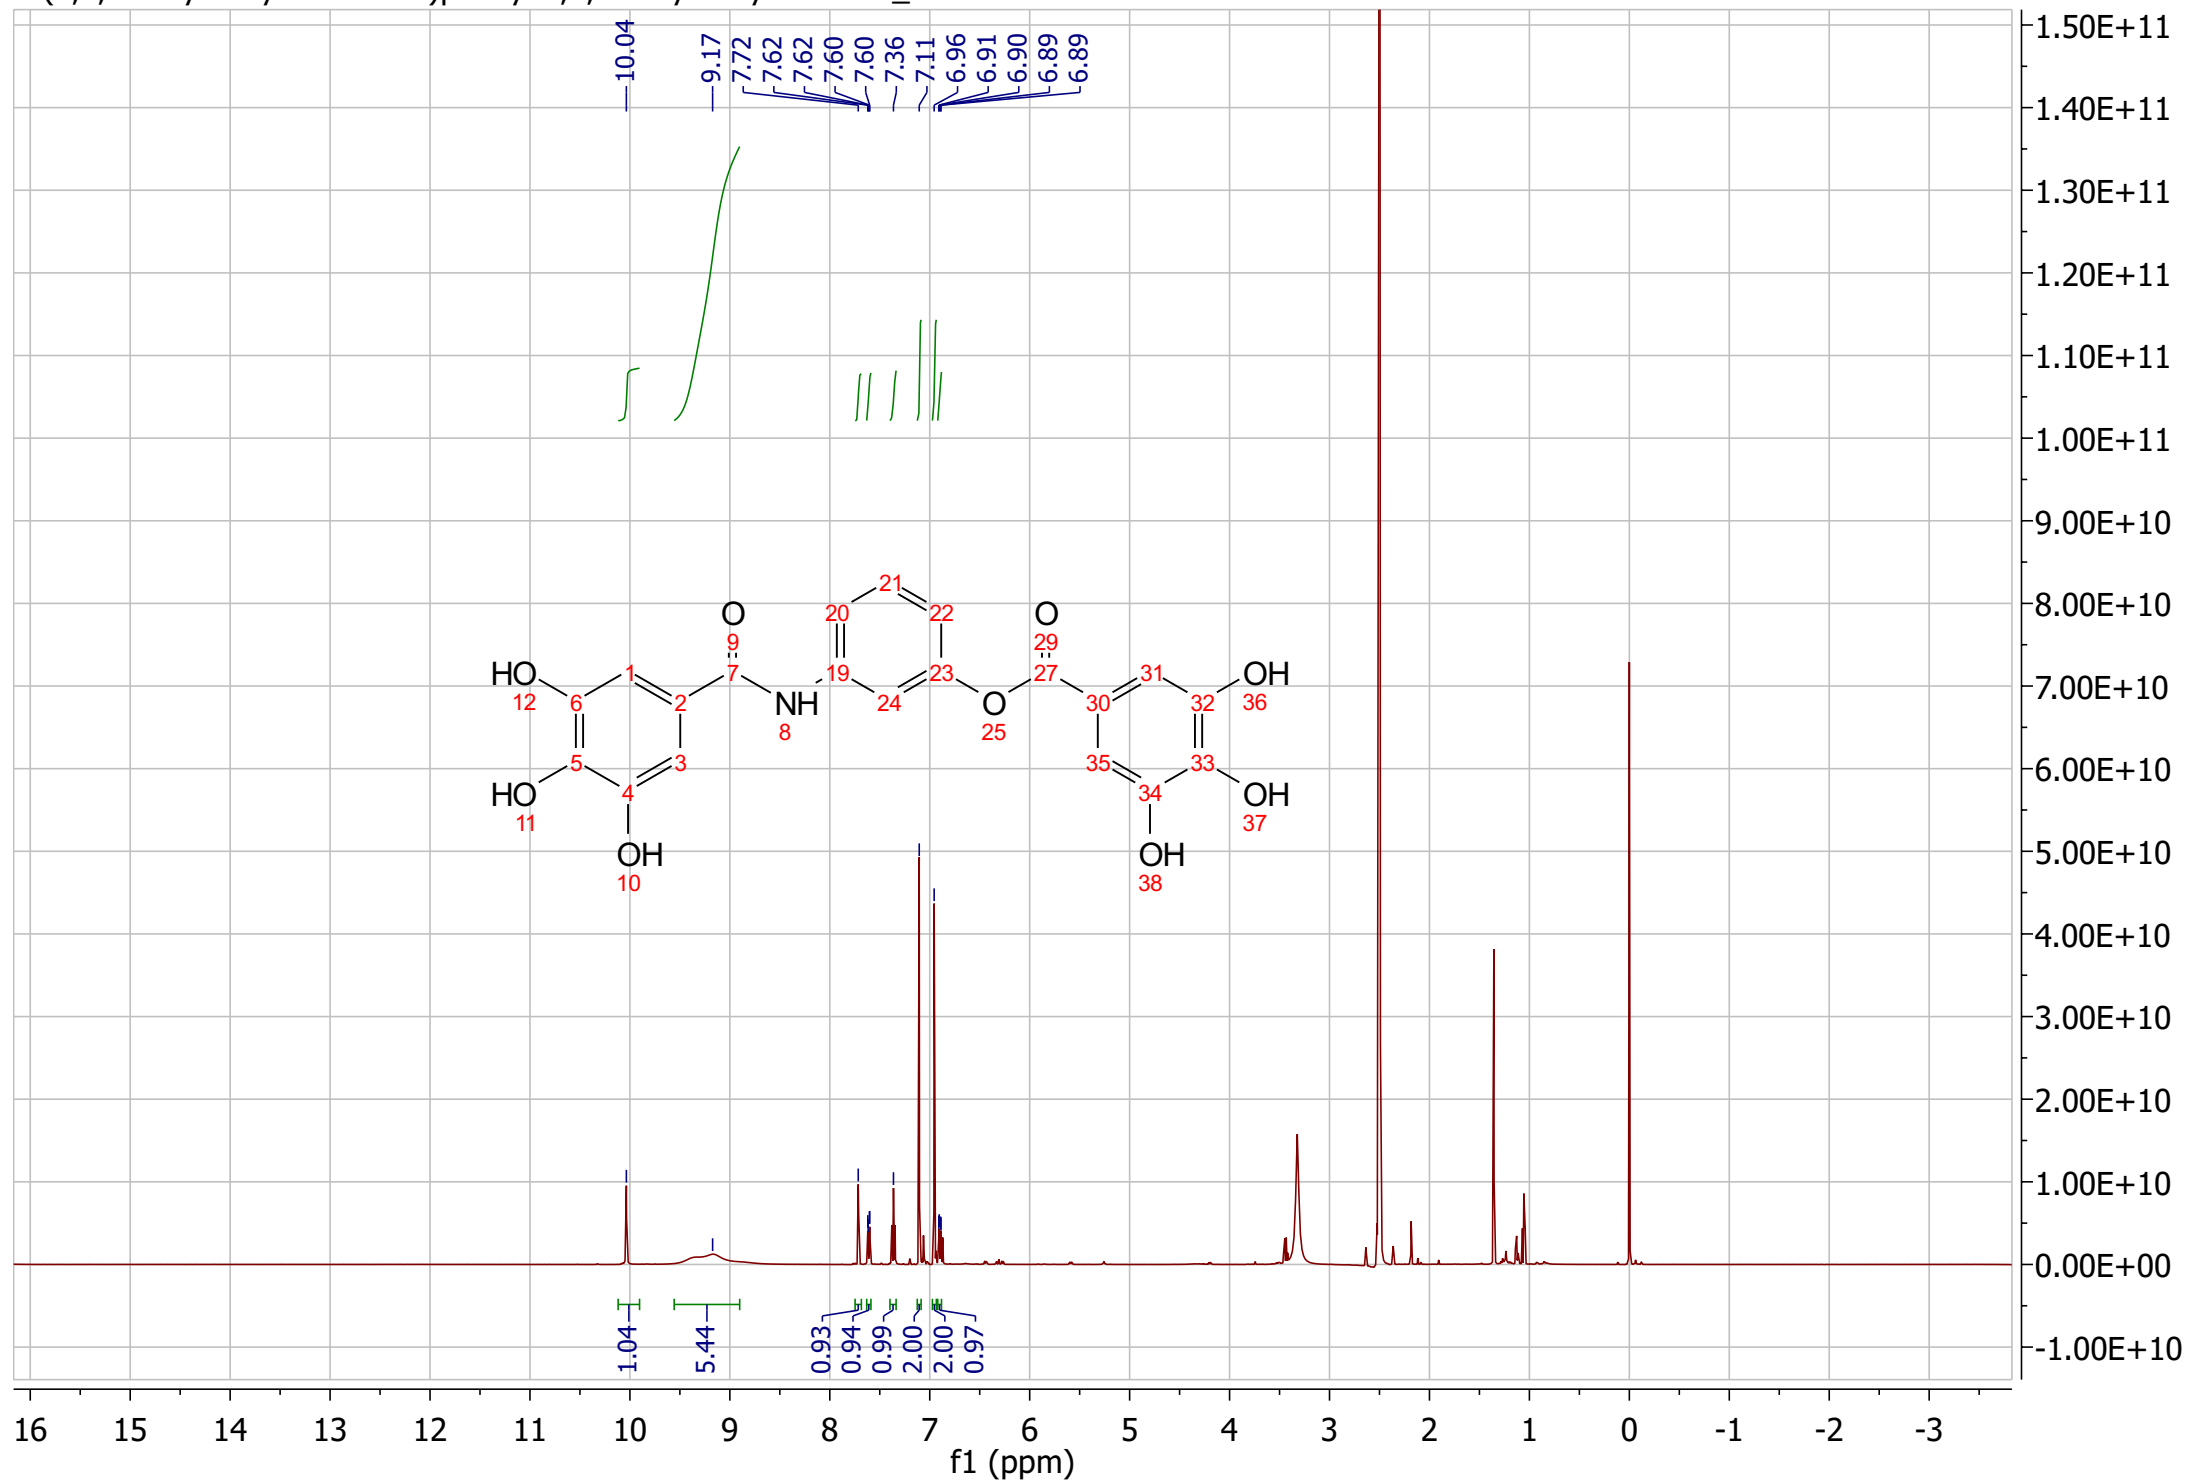

3-(3,4,5-trihydroxybenzamido)phenyl 3,4,5-trihydroxybenzoate\_DMSO

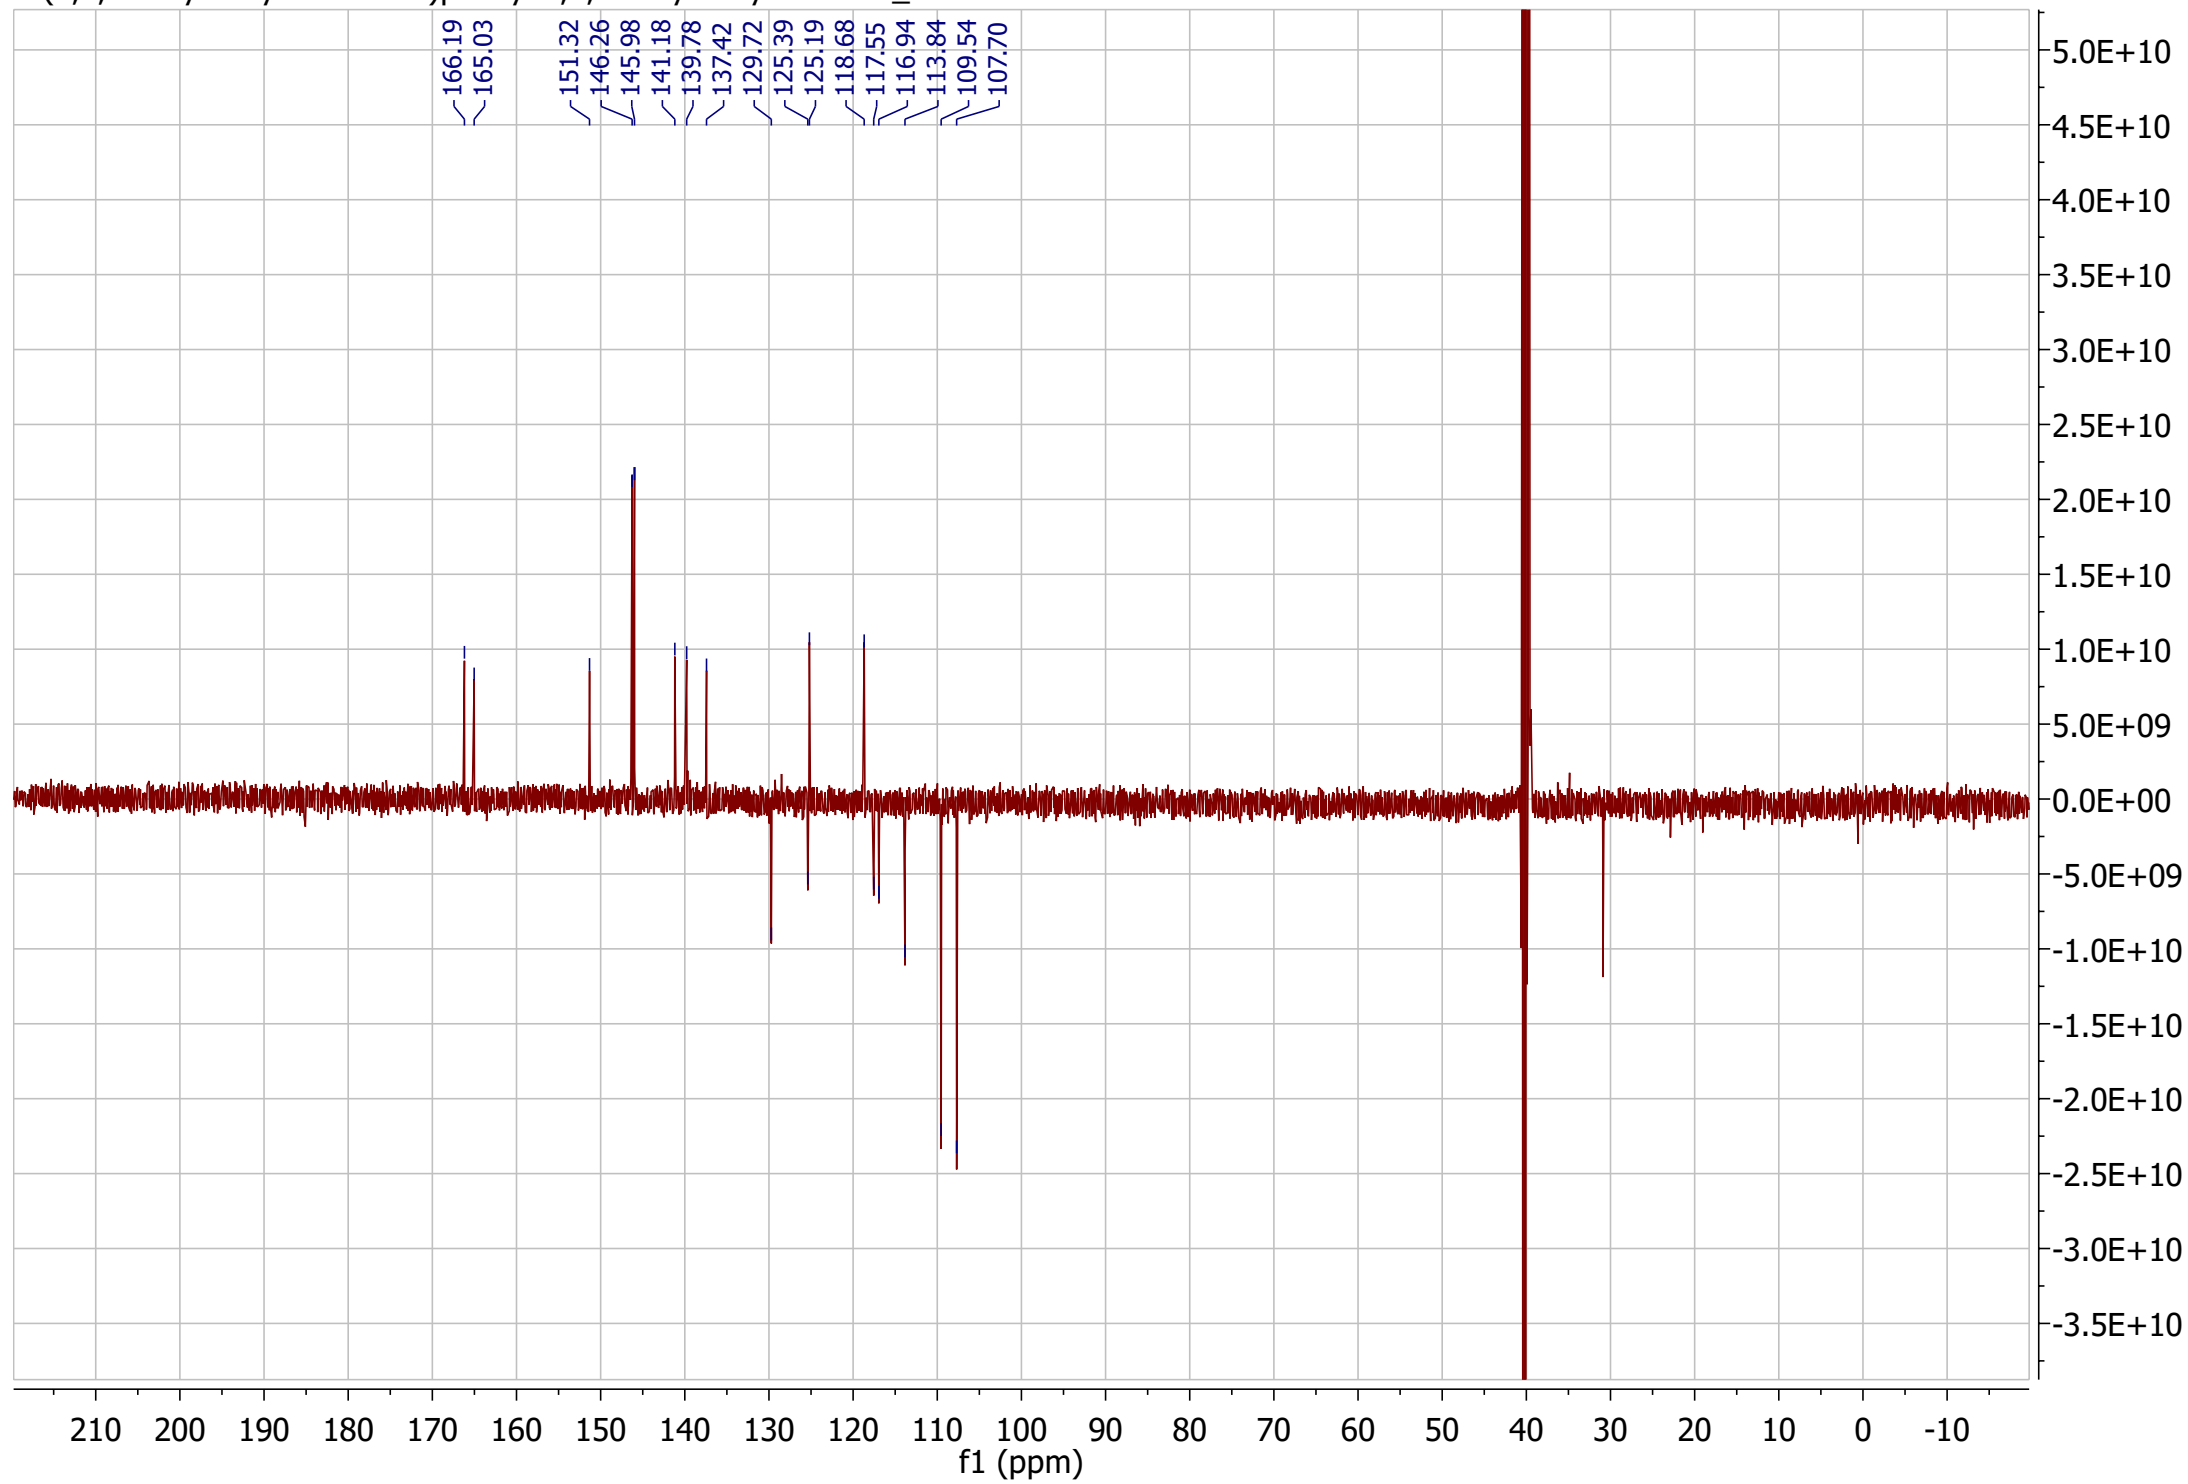

3-(3,4,5-tris(benzyloxy)benzamido)phenyl 3,4,5-tris(benzyloxy)benzoate\_CDCl3

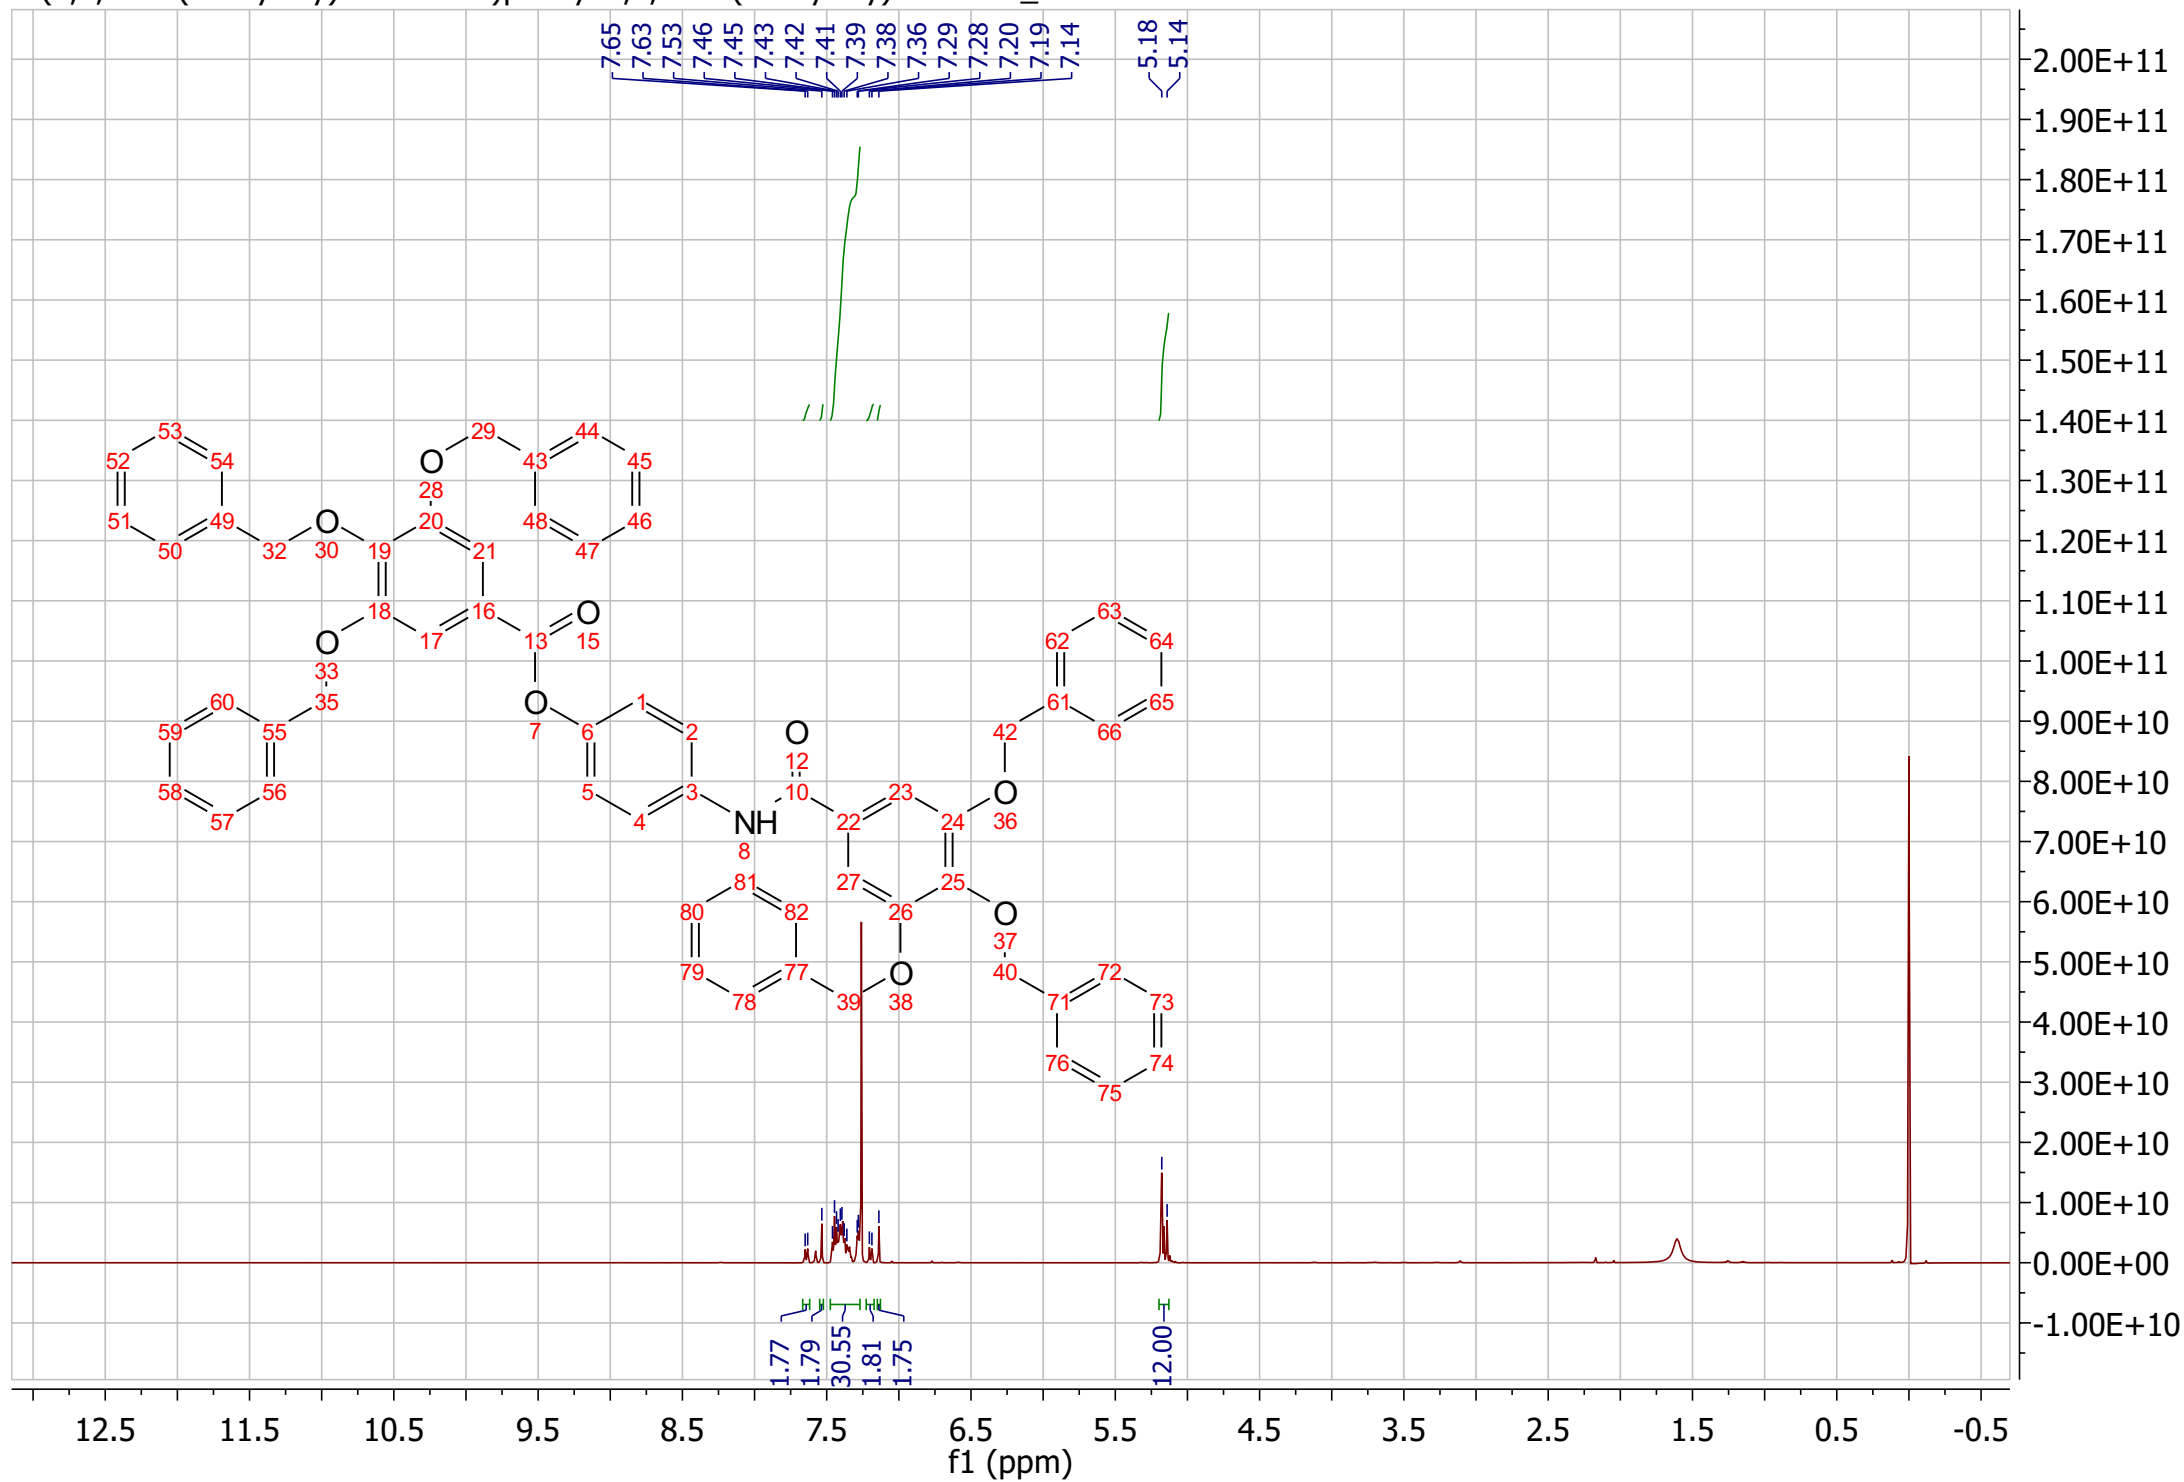

Ethane-1,2-diyl bis(3,4,5-trihydroxy)benzoate)\_DMSO

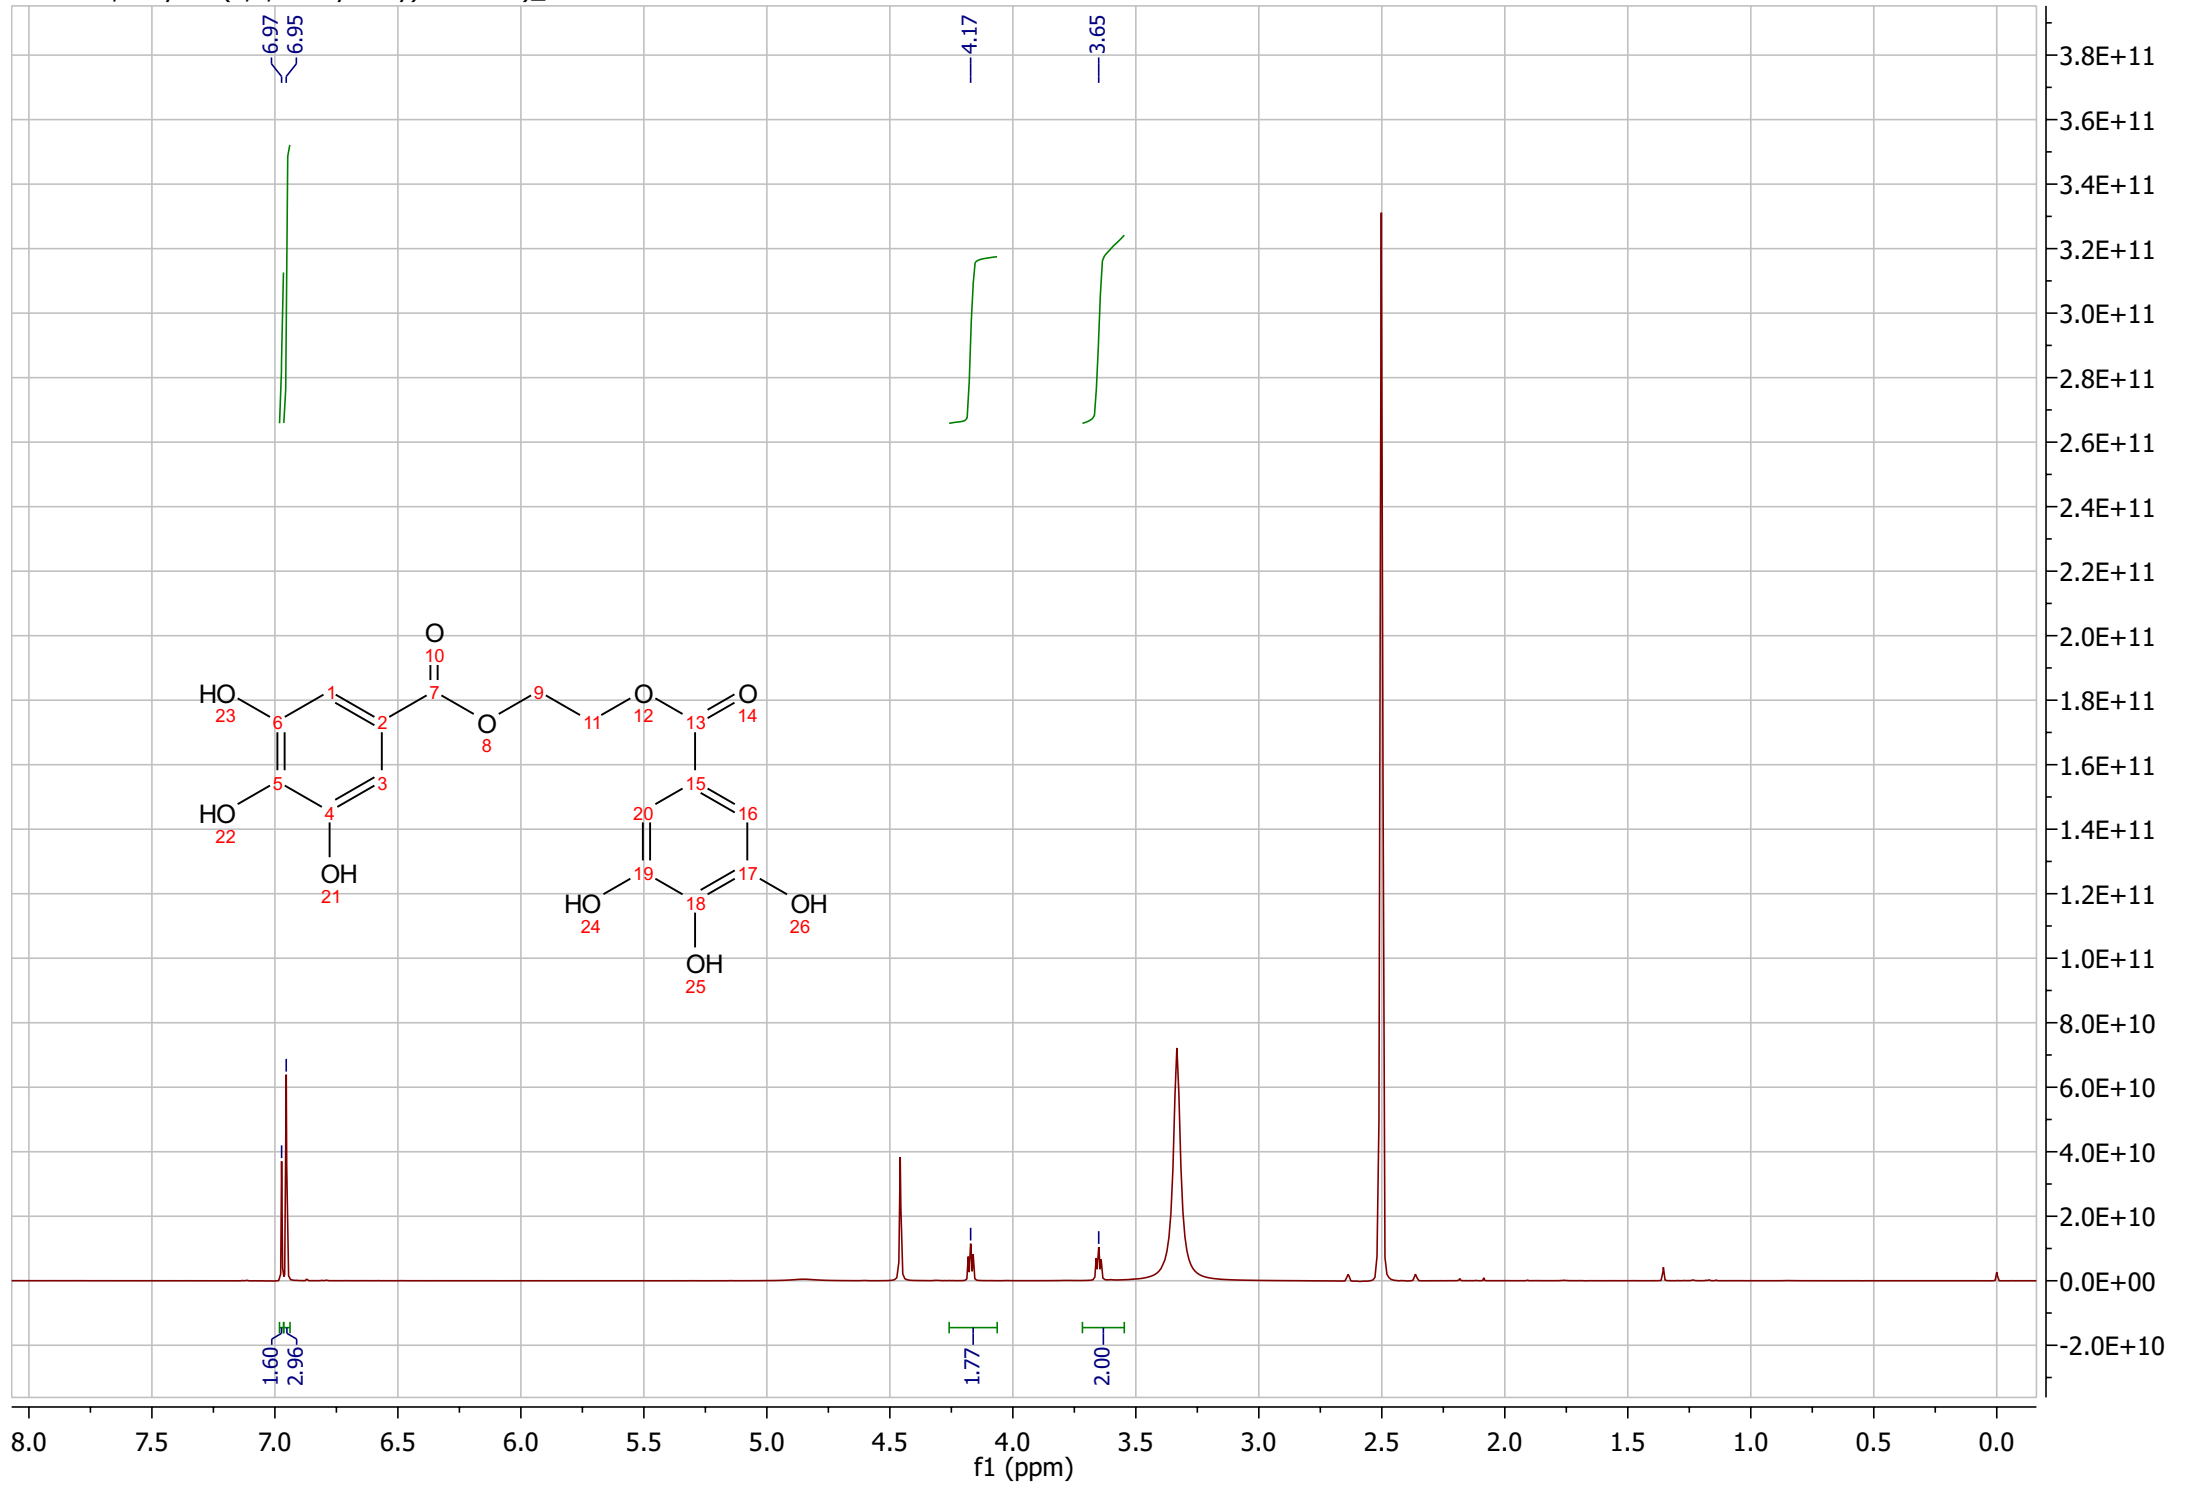



Ethane-1,2-diyl bis(3,4,5-trihydroxy)benzoate)\_DMSO

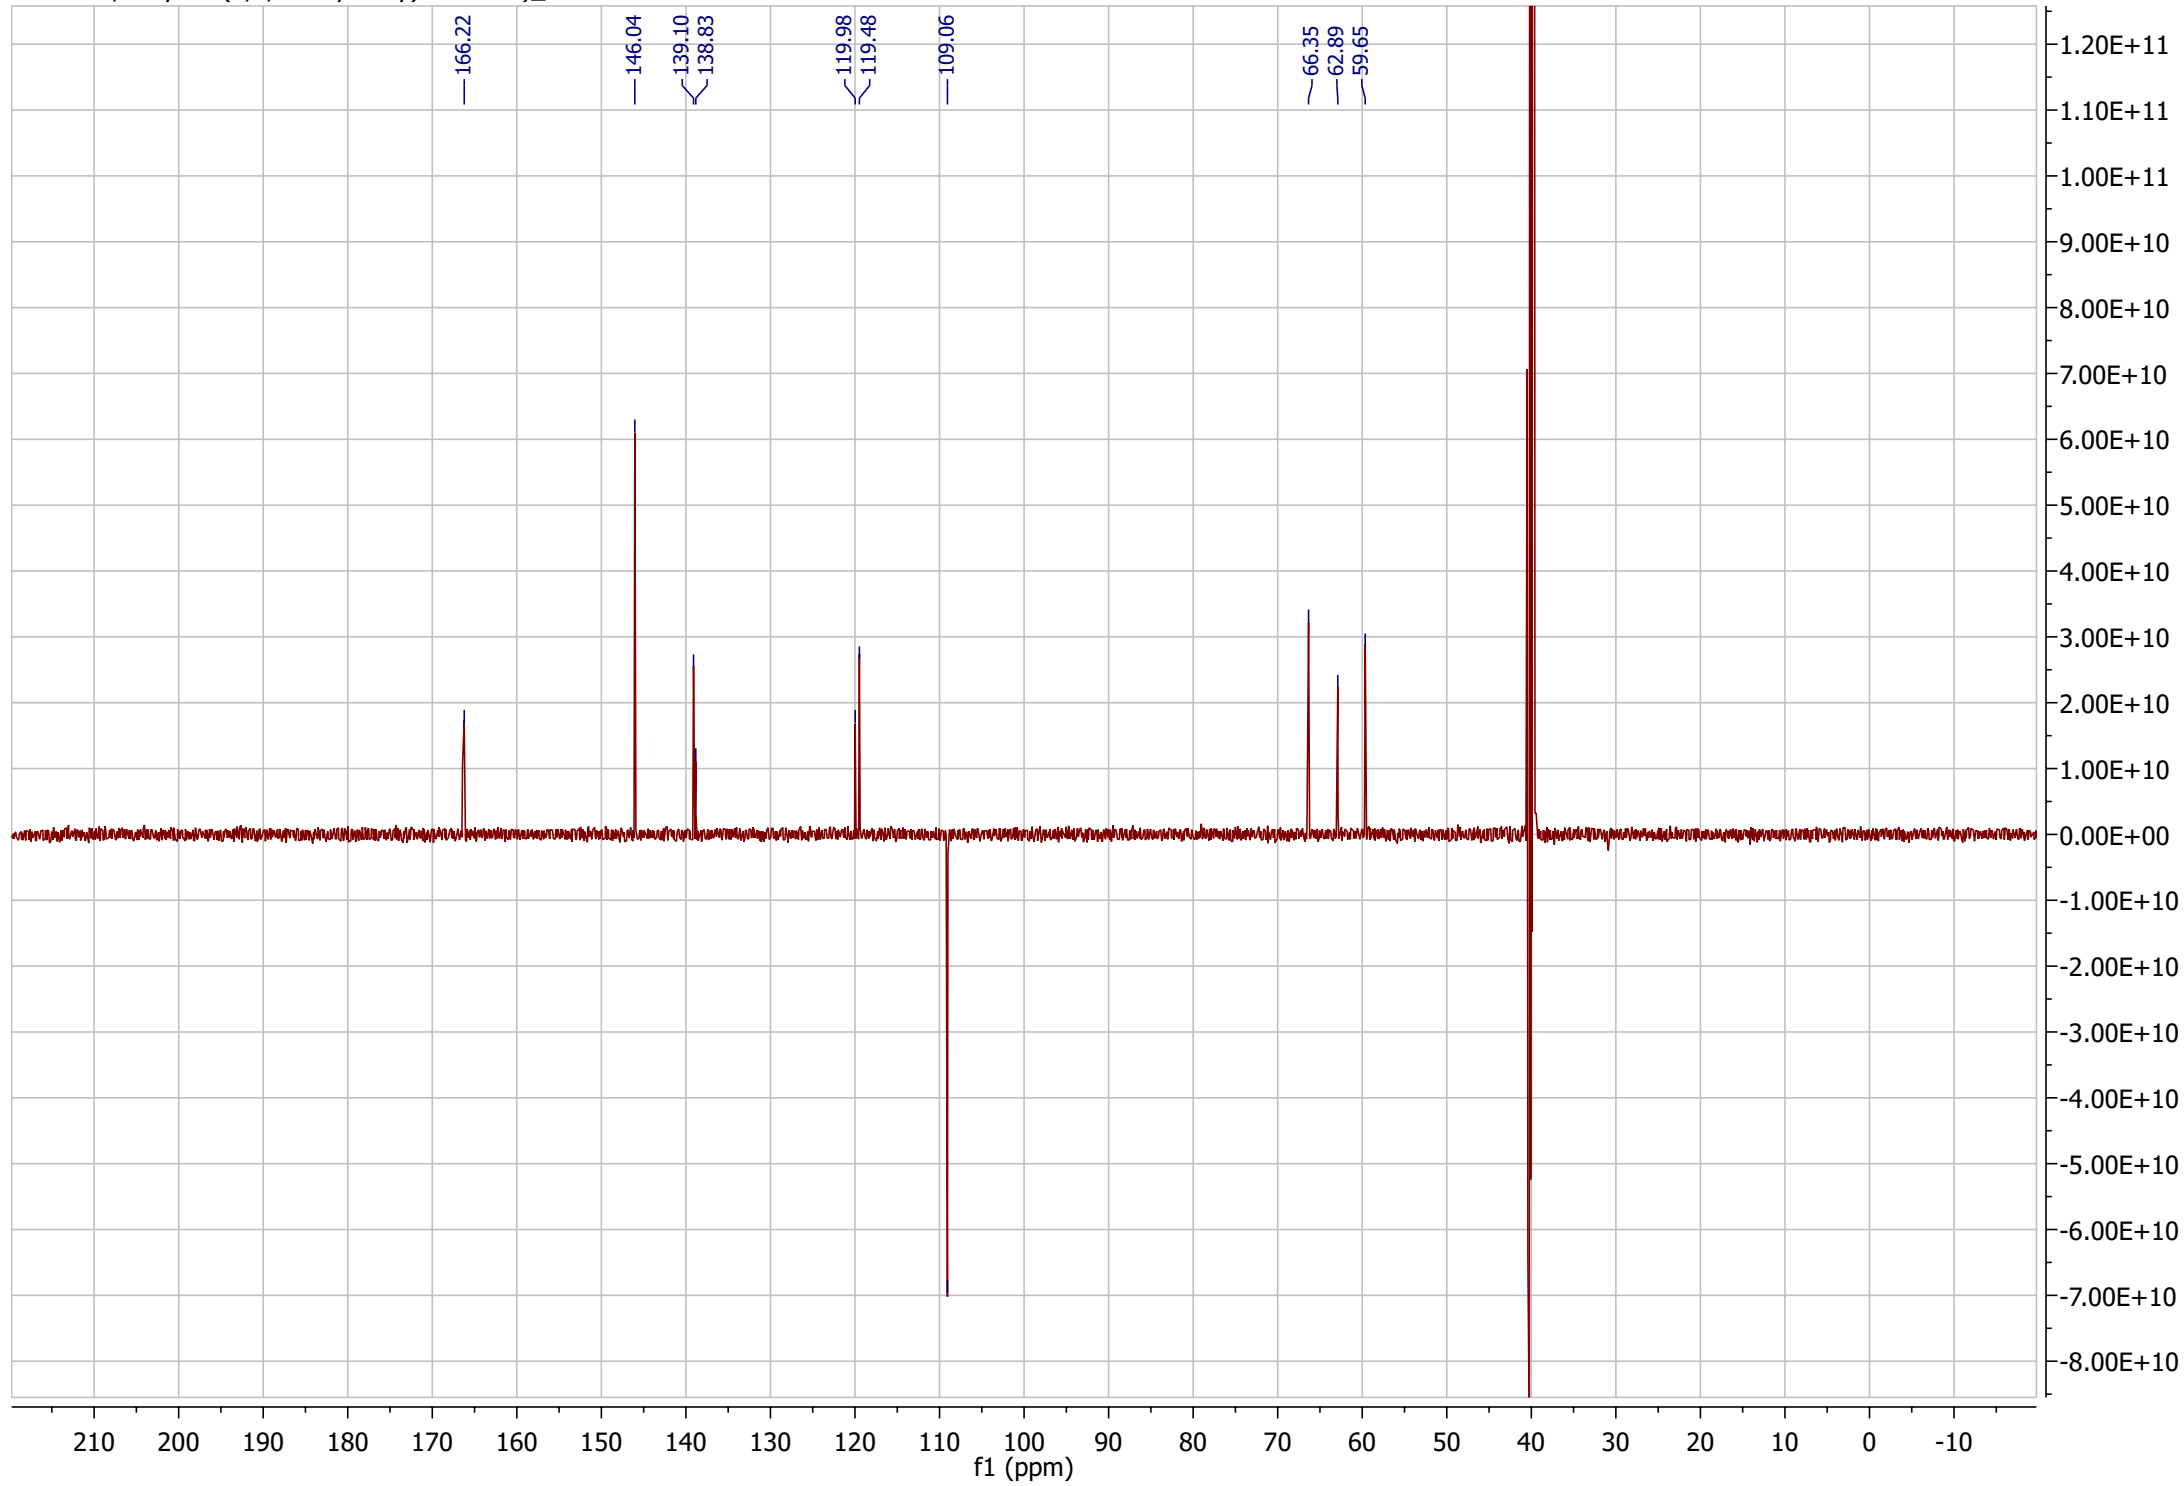

Propane-1,3-diyl bis(3,4,5-trihydroxybenzoate)\_DMSO

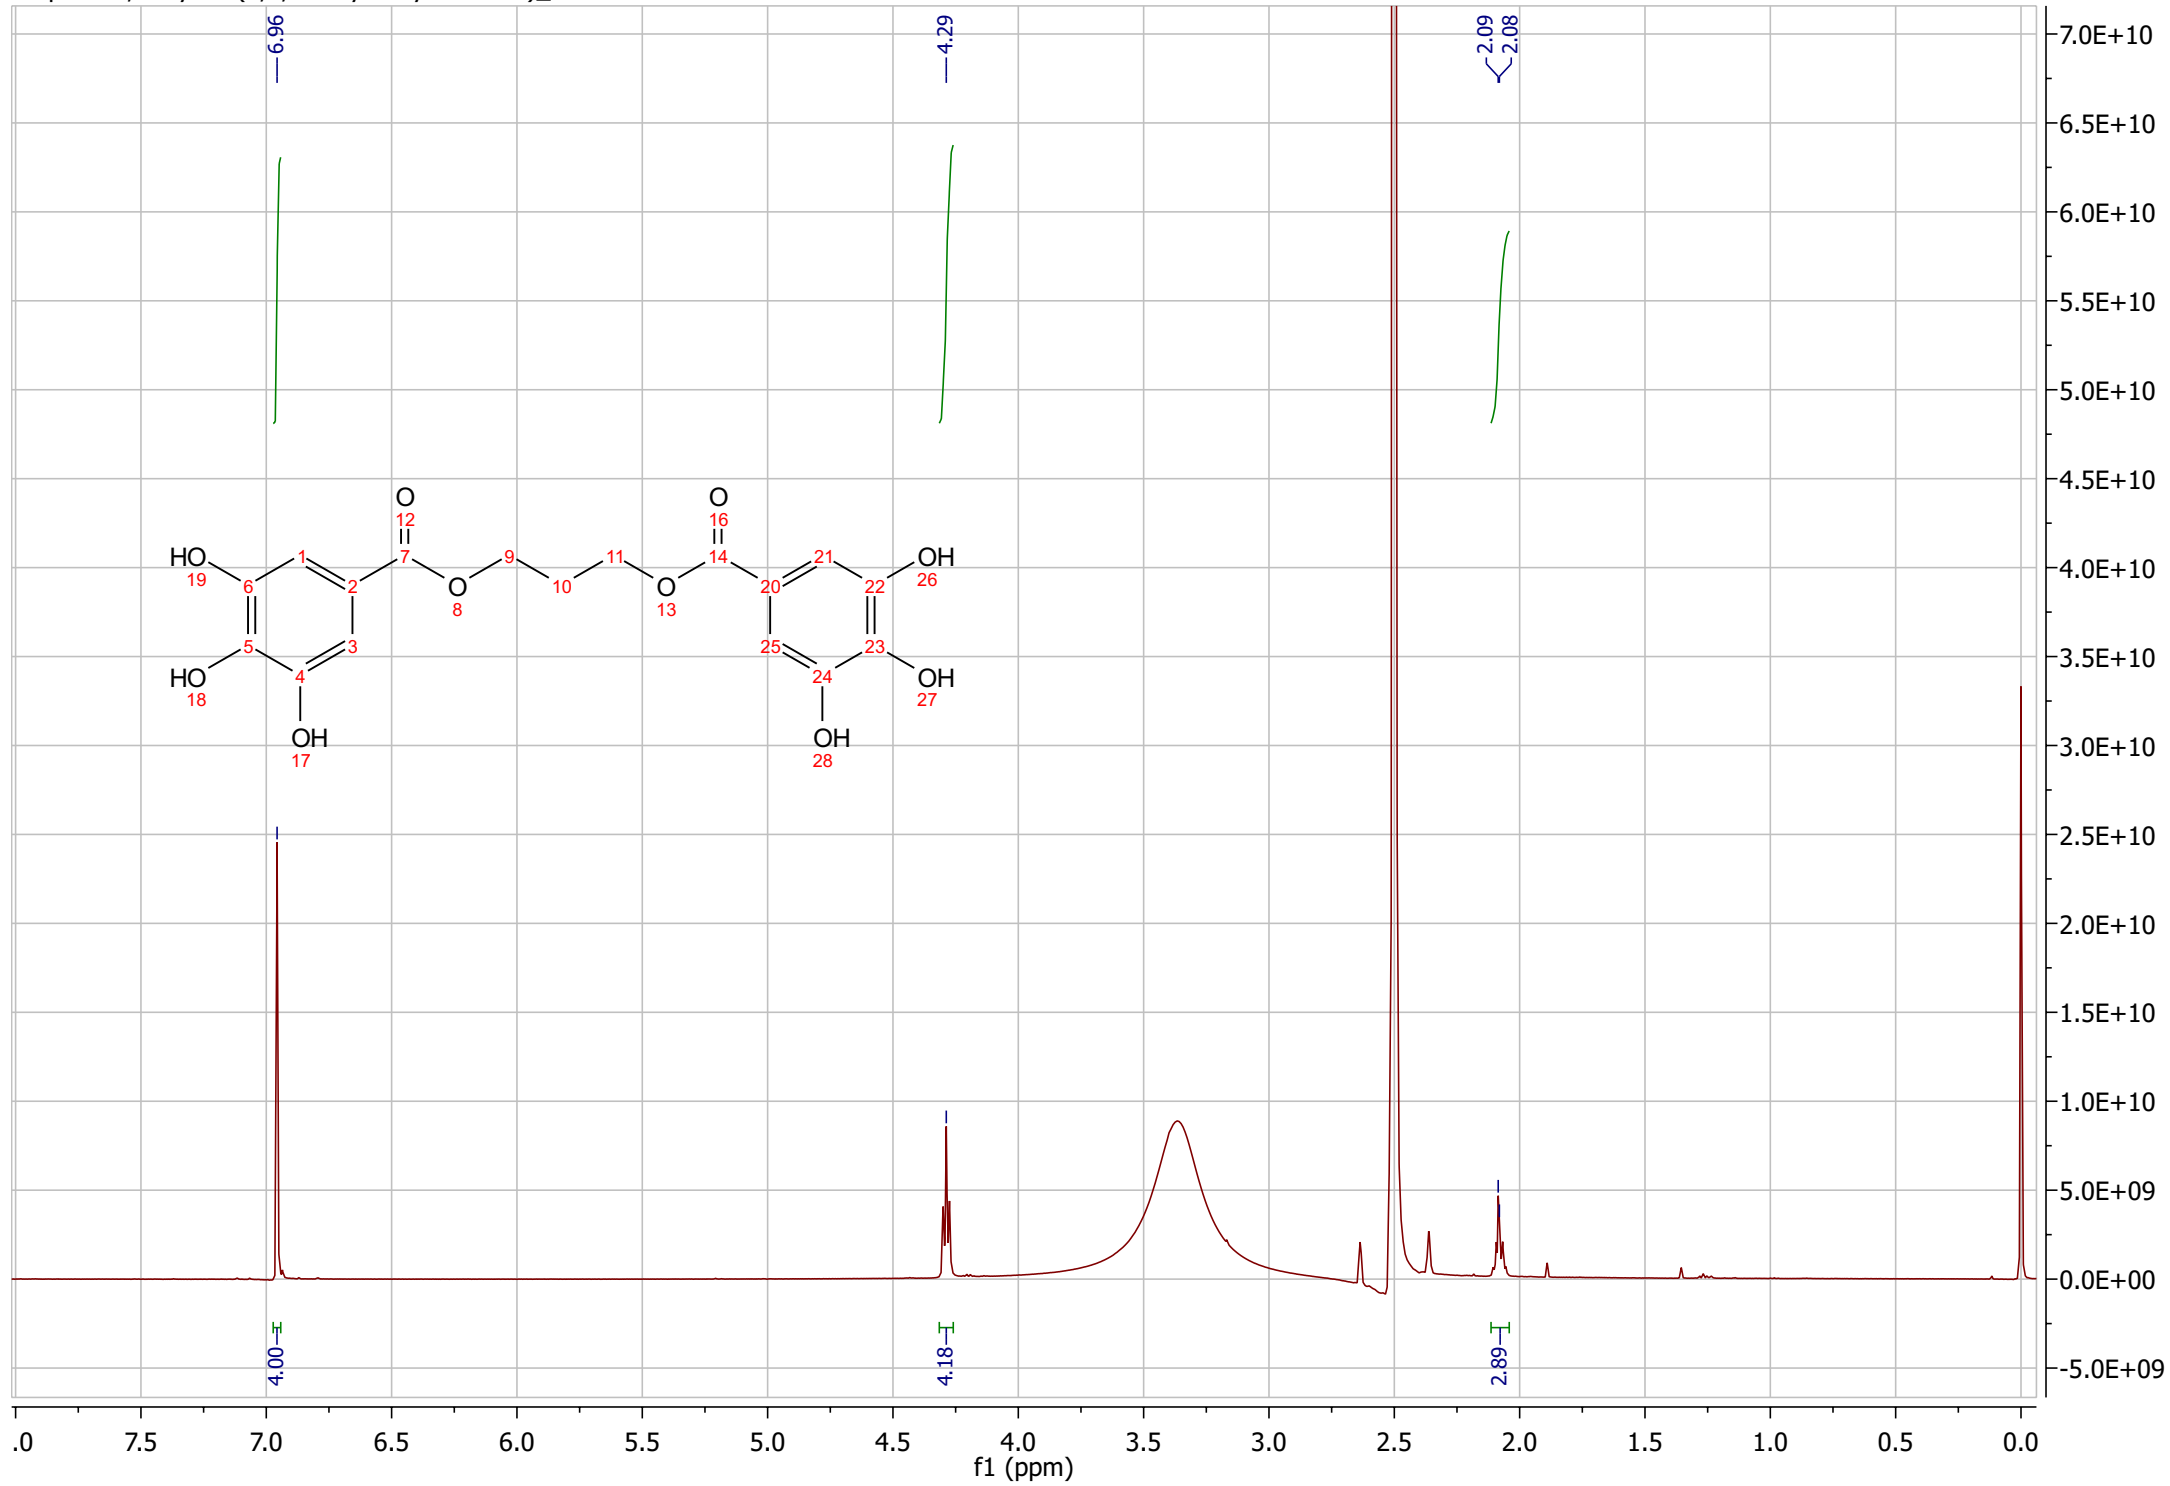

Propane-1,3-diyl bis(3,4,5-trihydroxybenzoate)\_DMSO

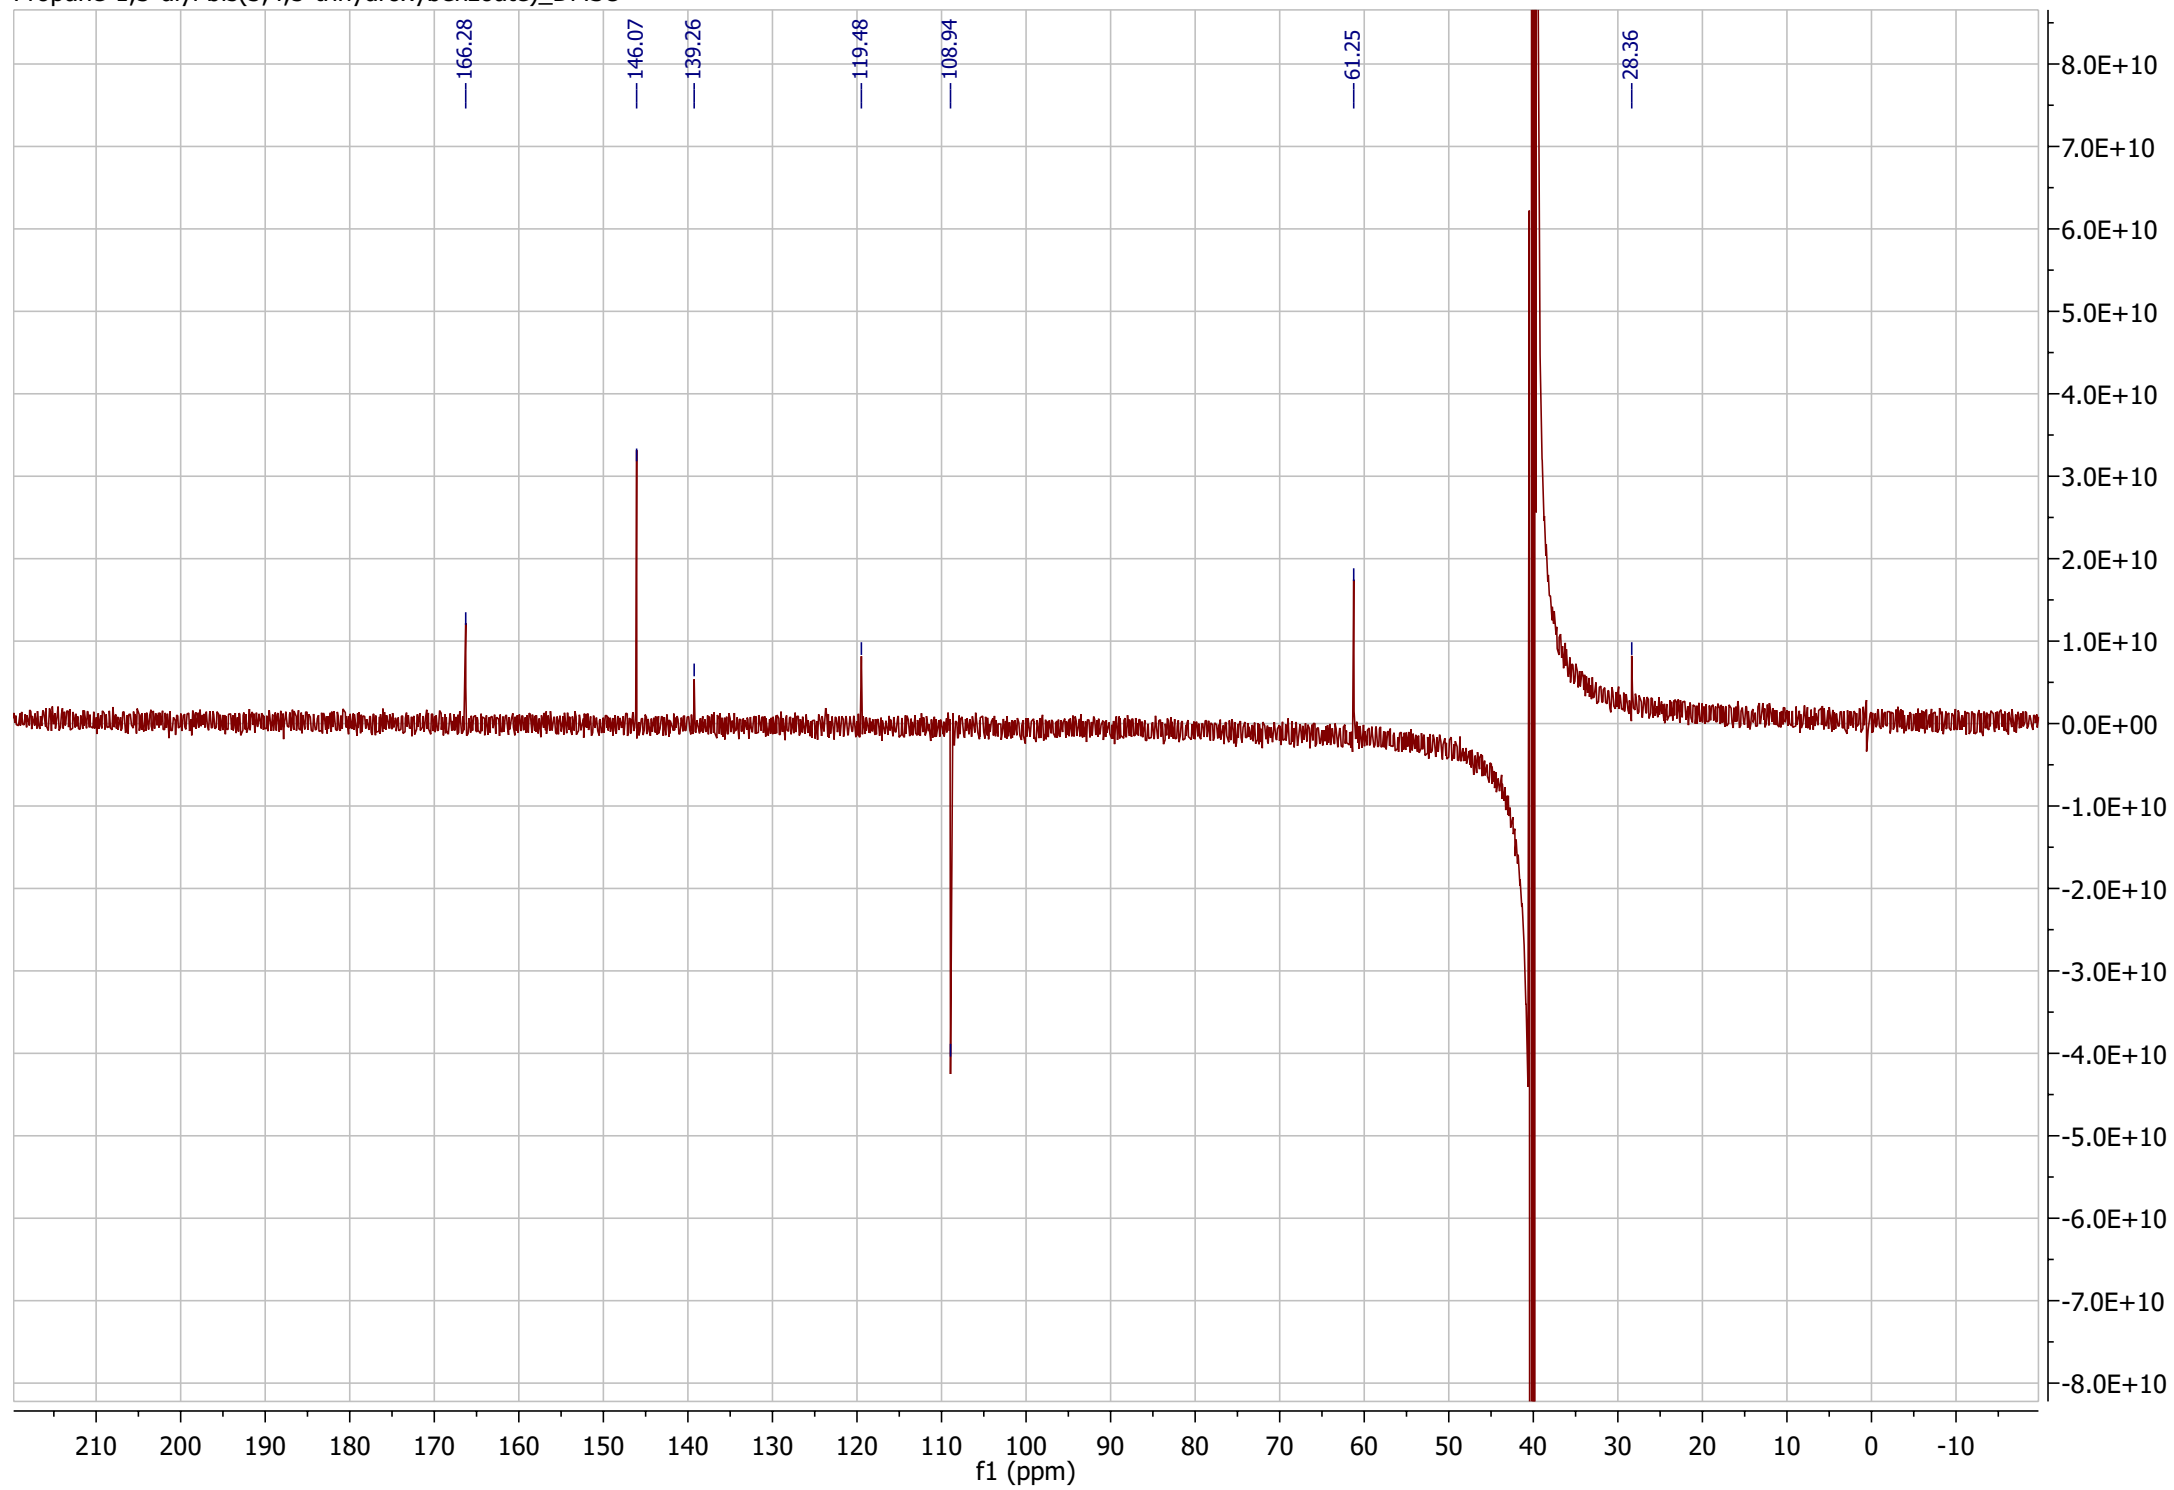

Butane-1,4-diyl bis(3,4,5-trihydroxybenzoate)\_DMSO

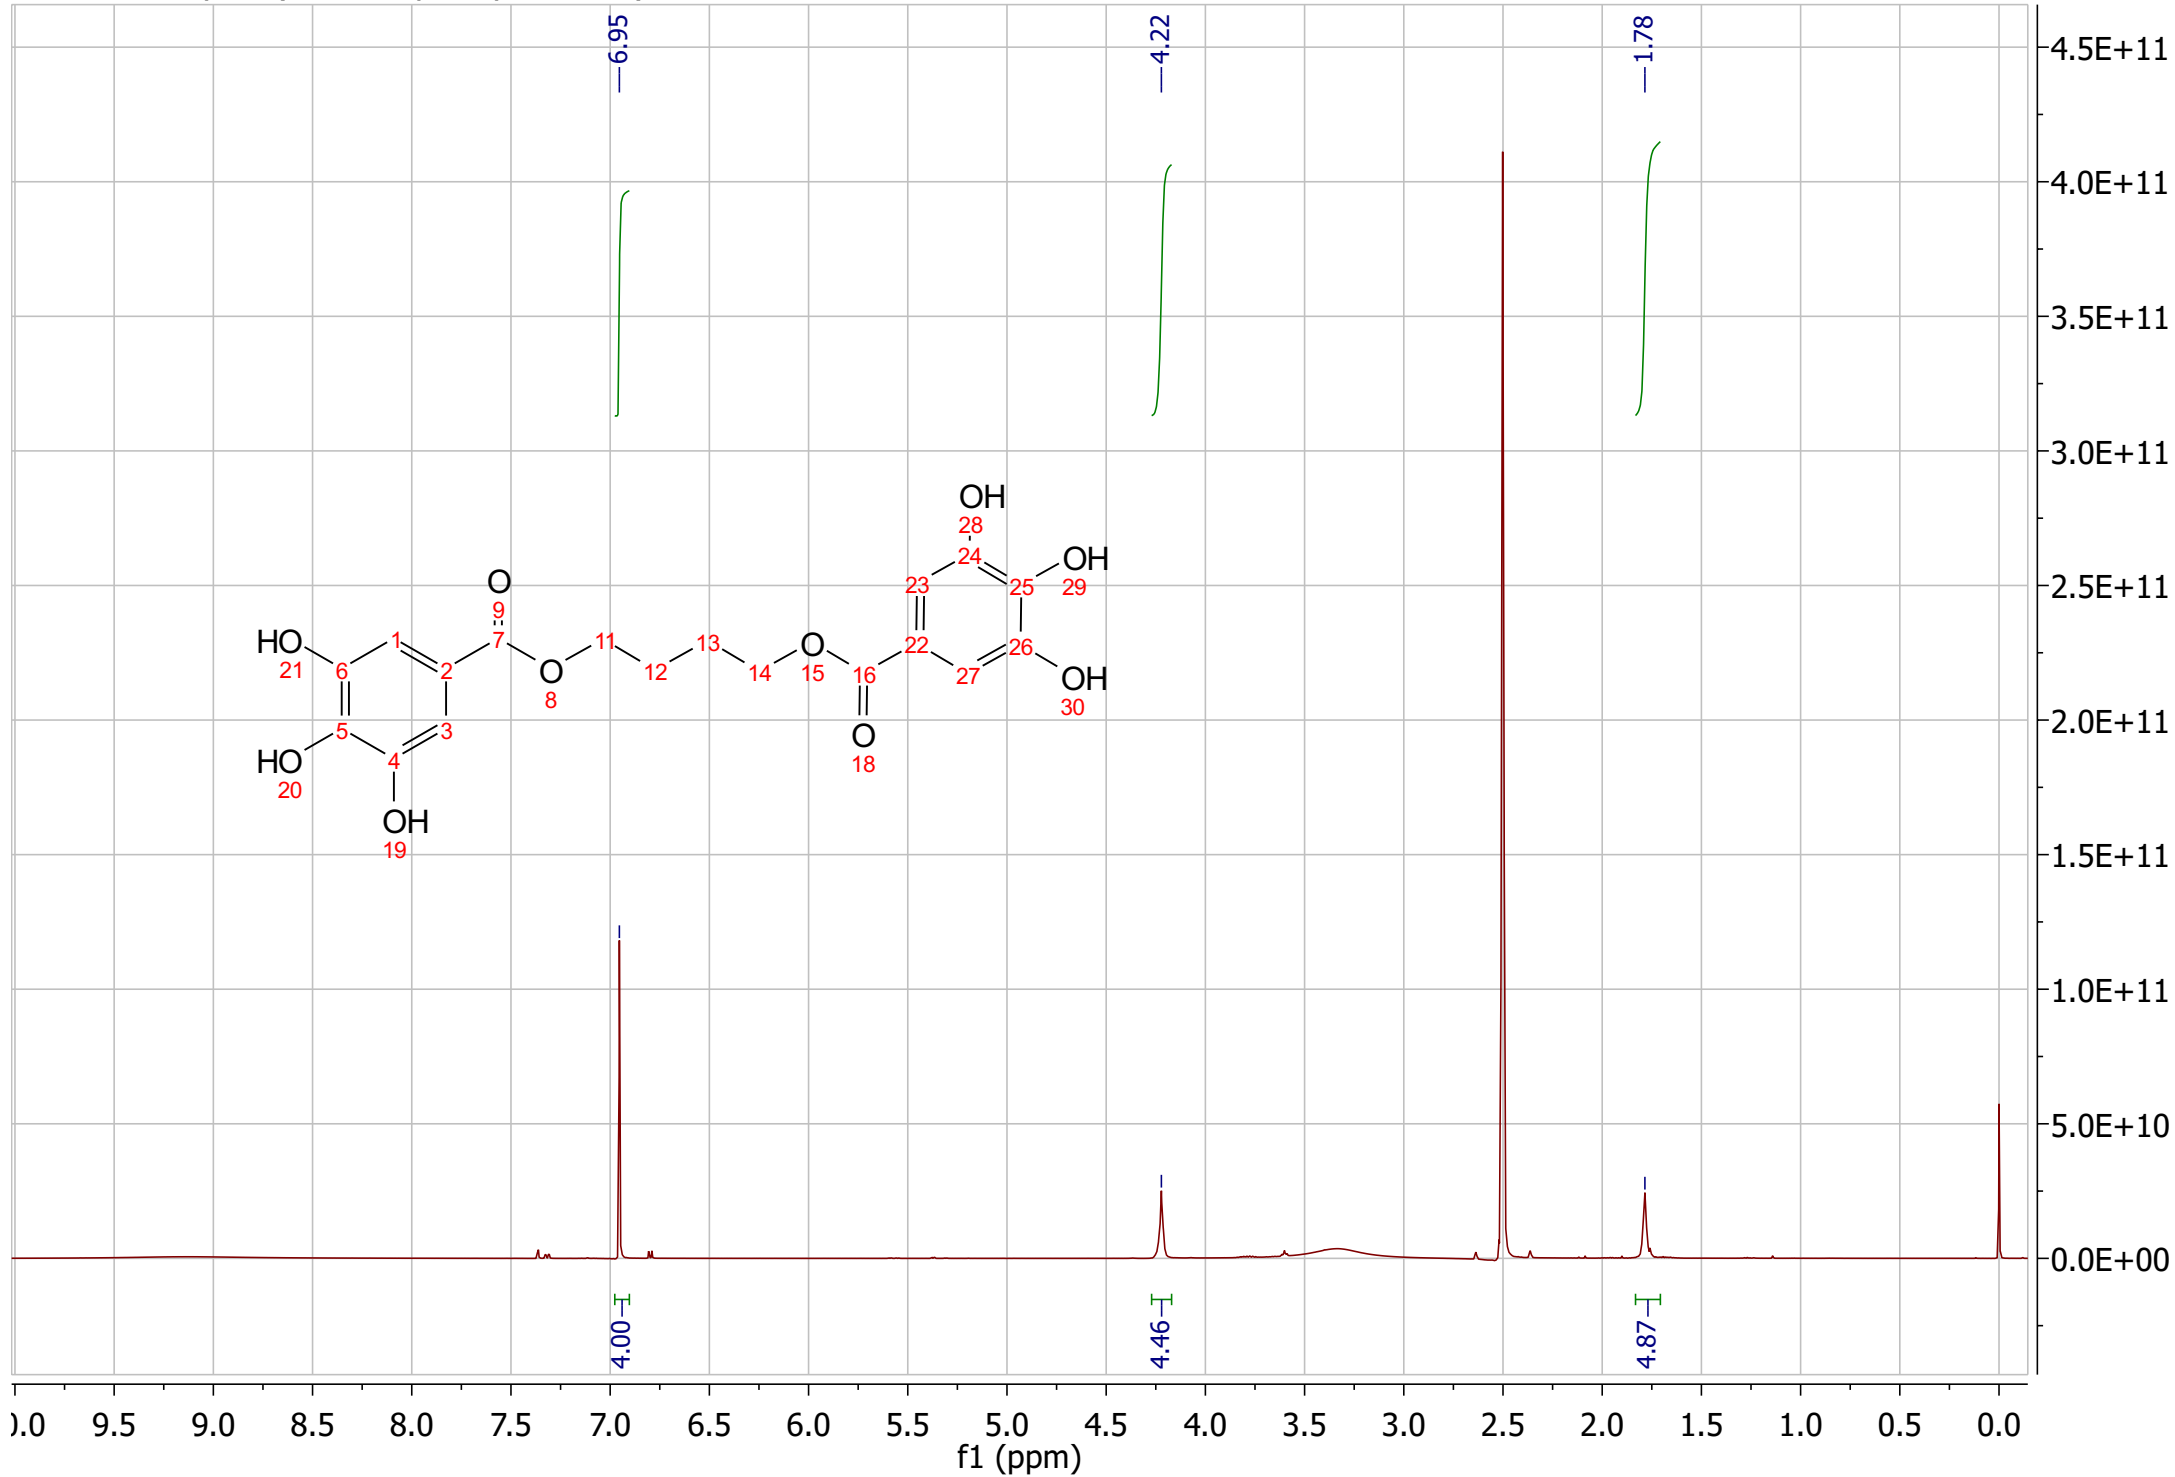

Butane-1,4-diyl bis(3,4,5-trihydroxybenzoate)\_DMSO

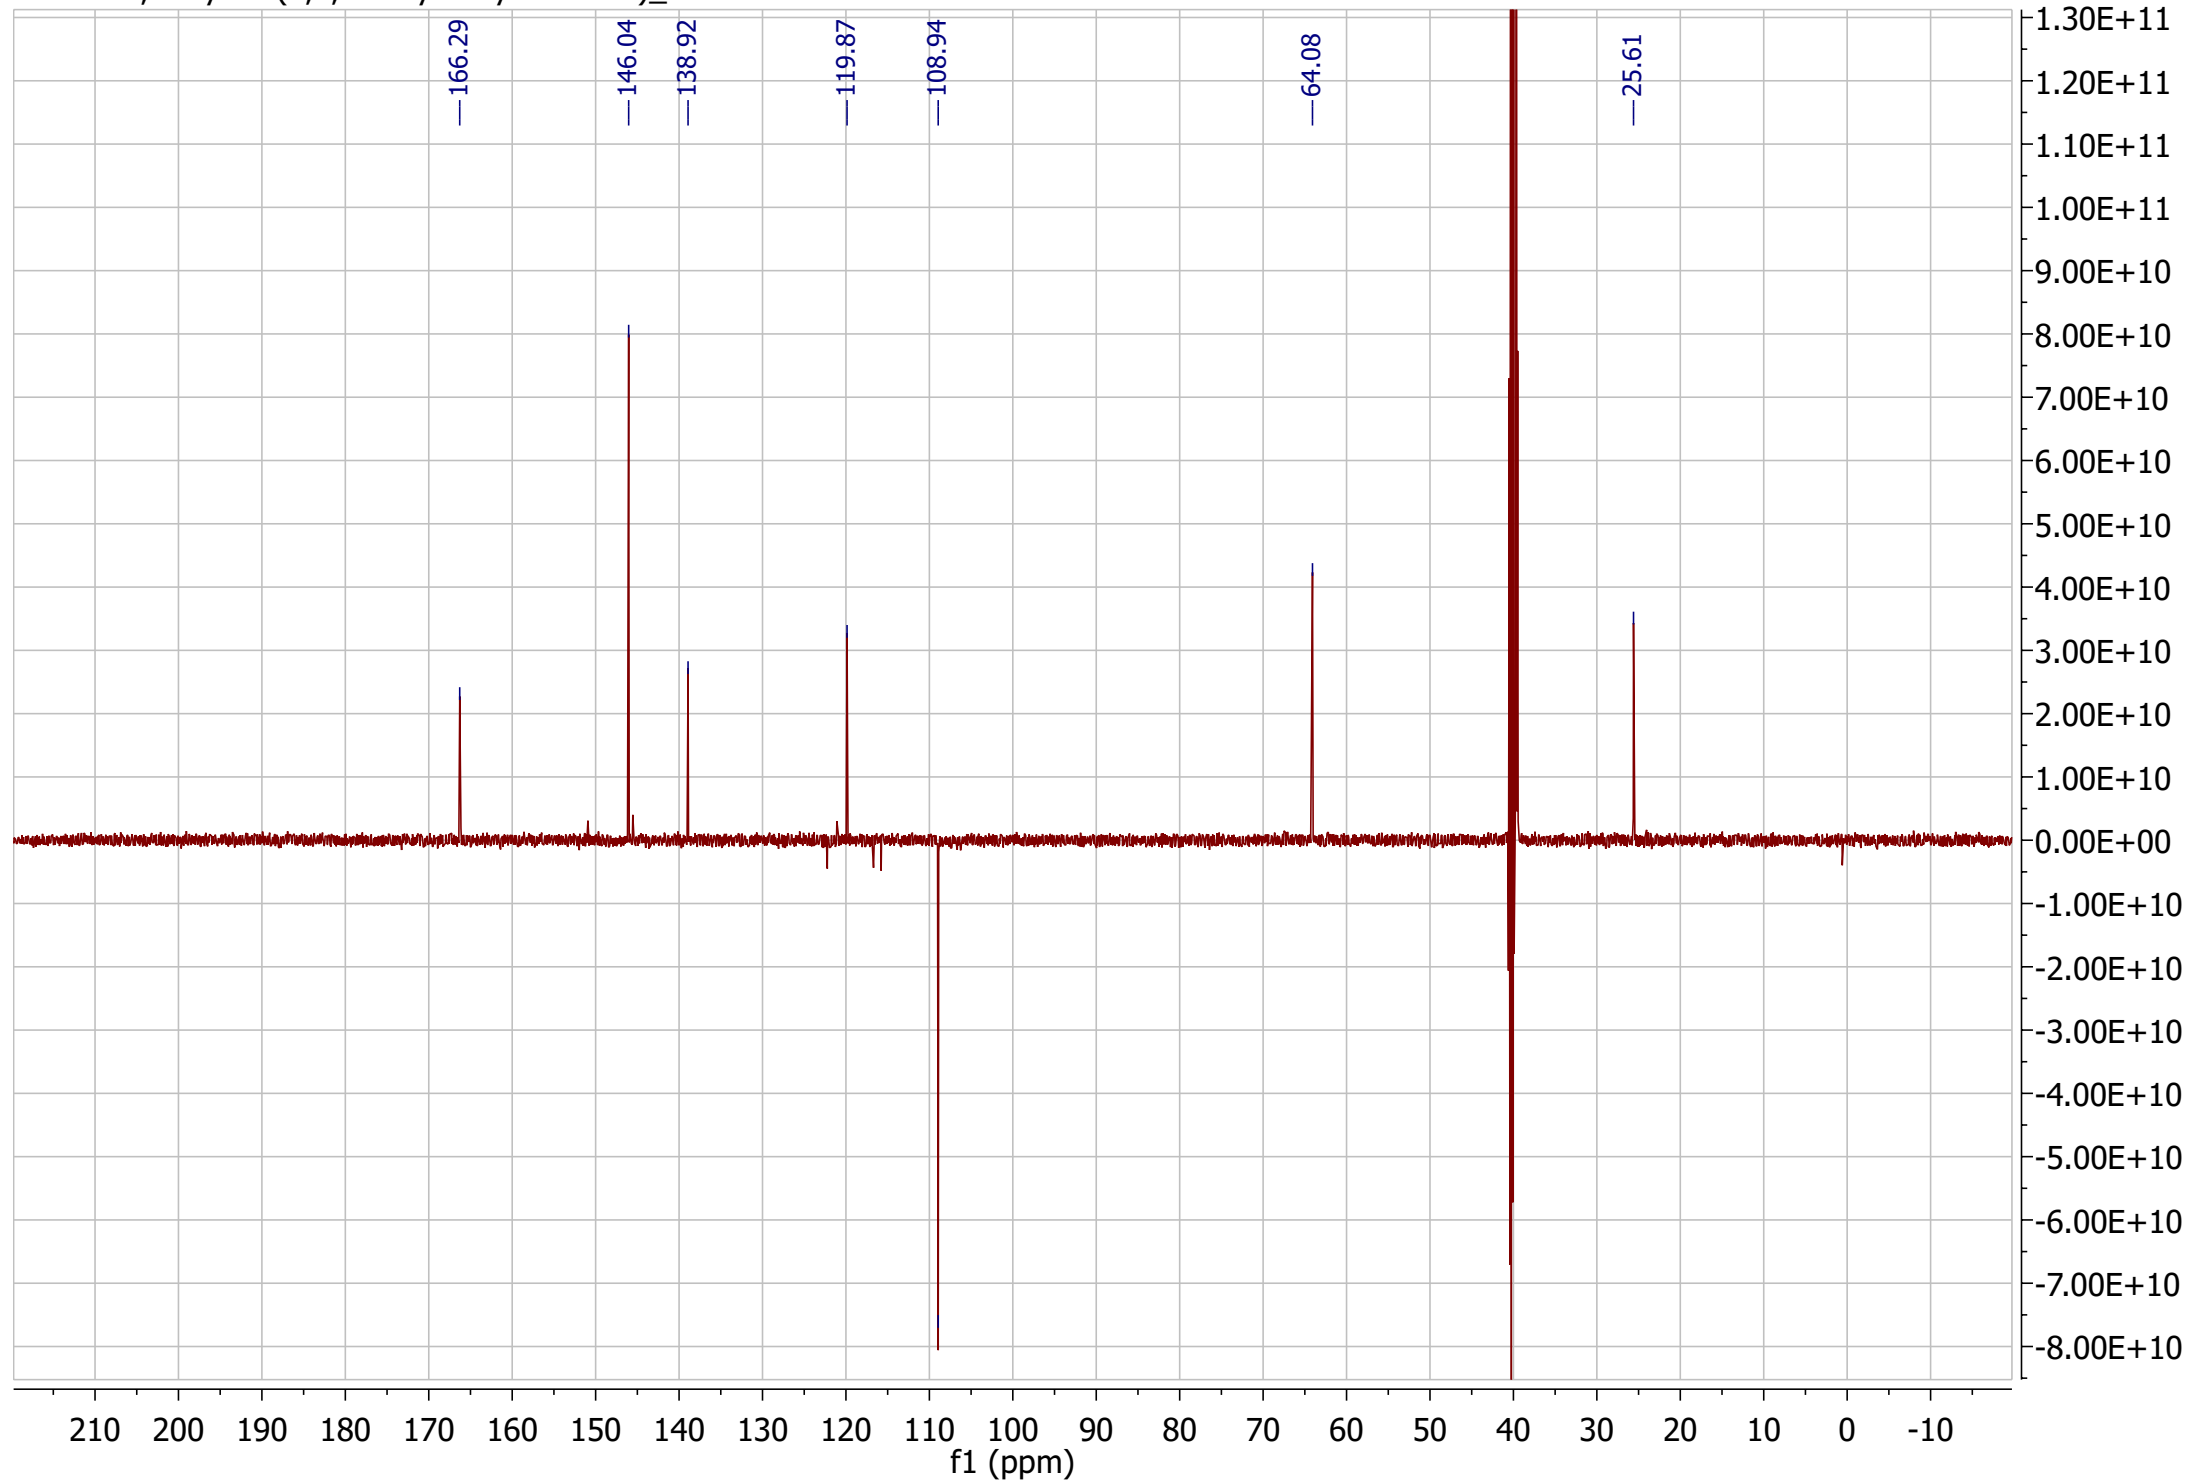

3-((3,4-dihydroxybenzoyl)oxy)propyl 3,4,5-trihydroxybenzoate\_DMSO

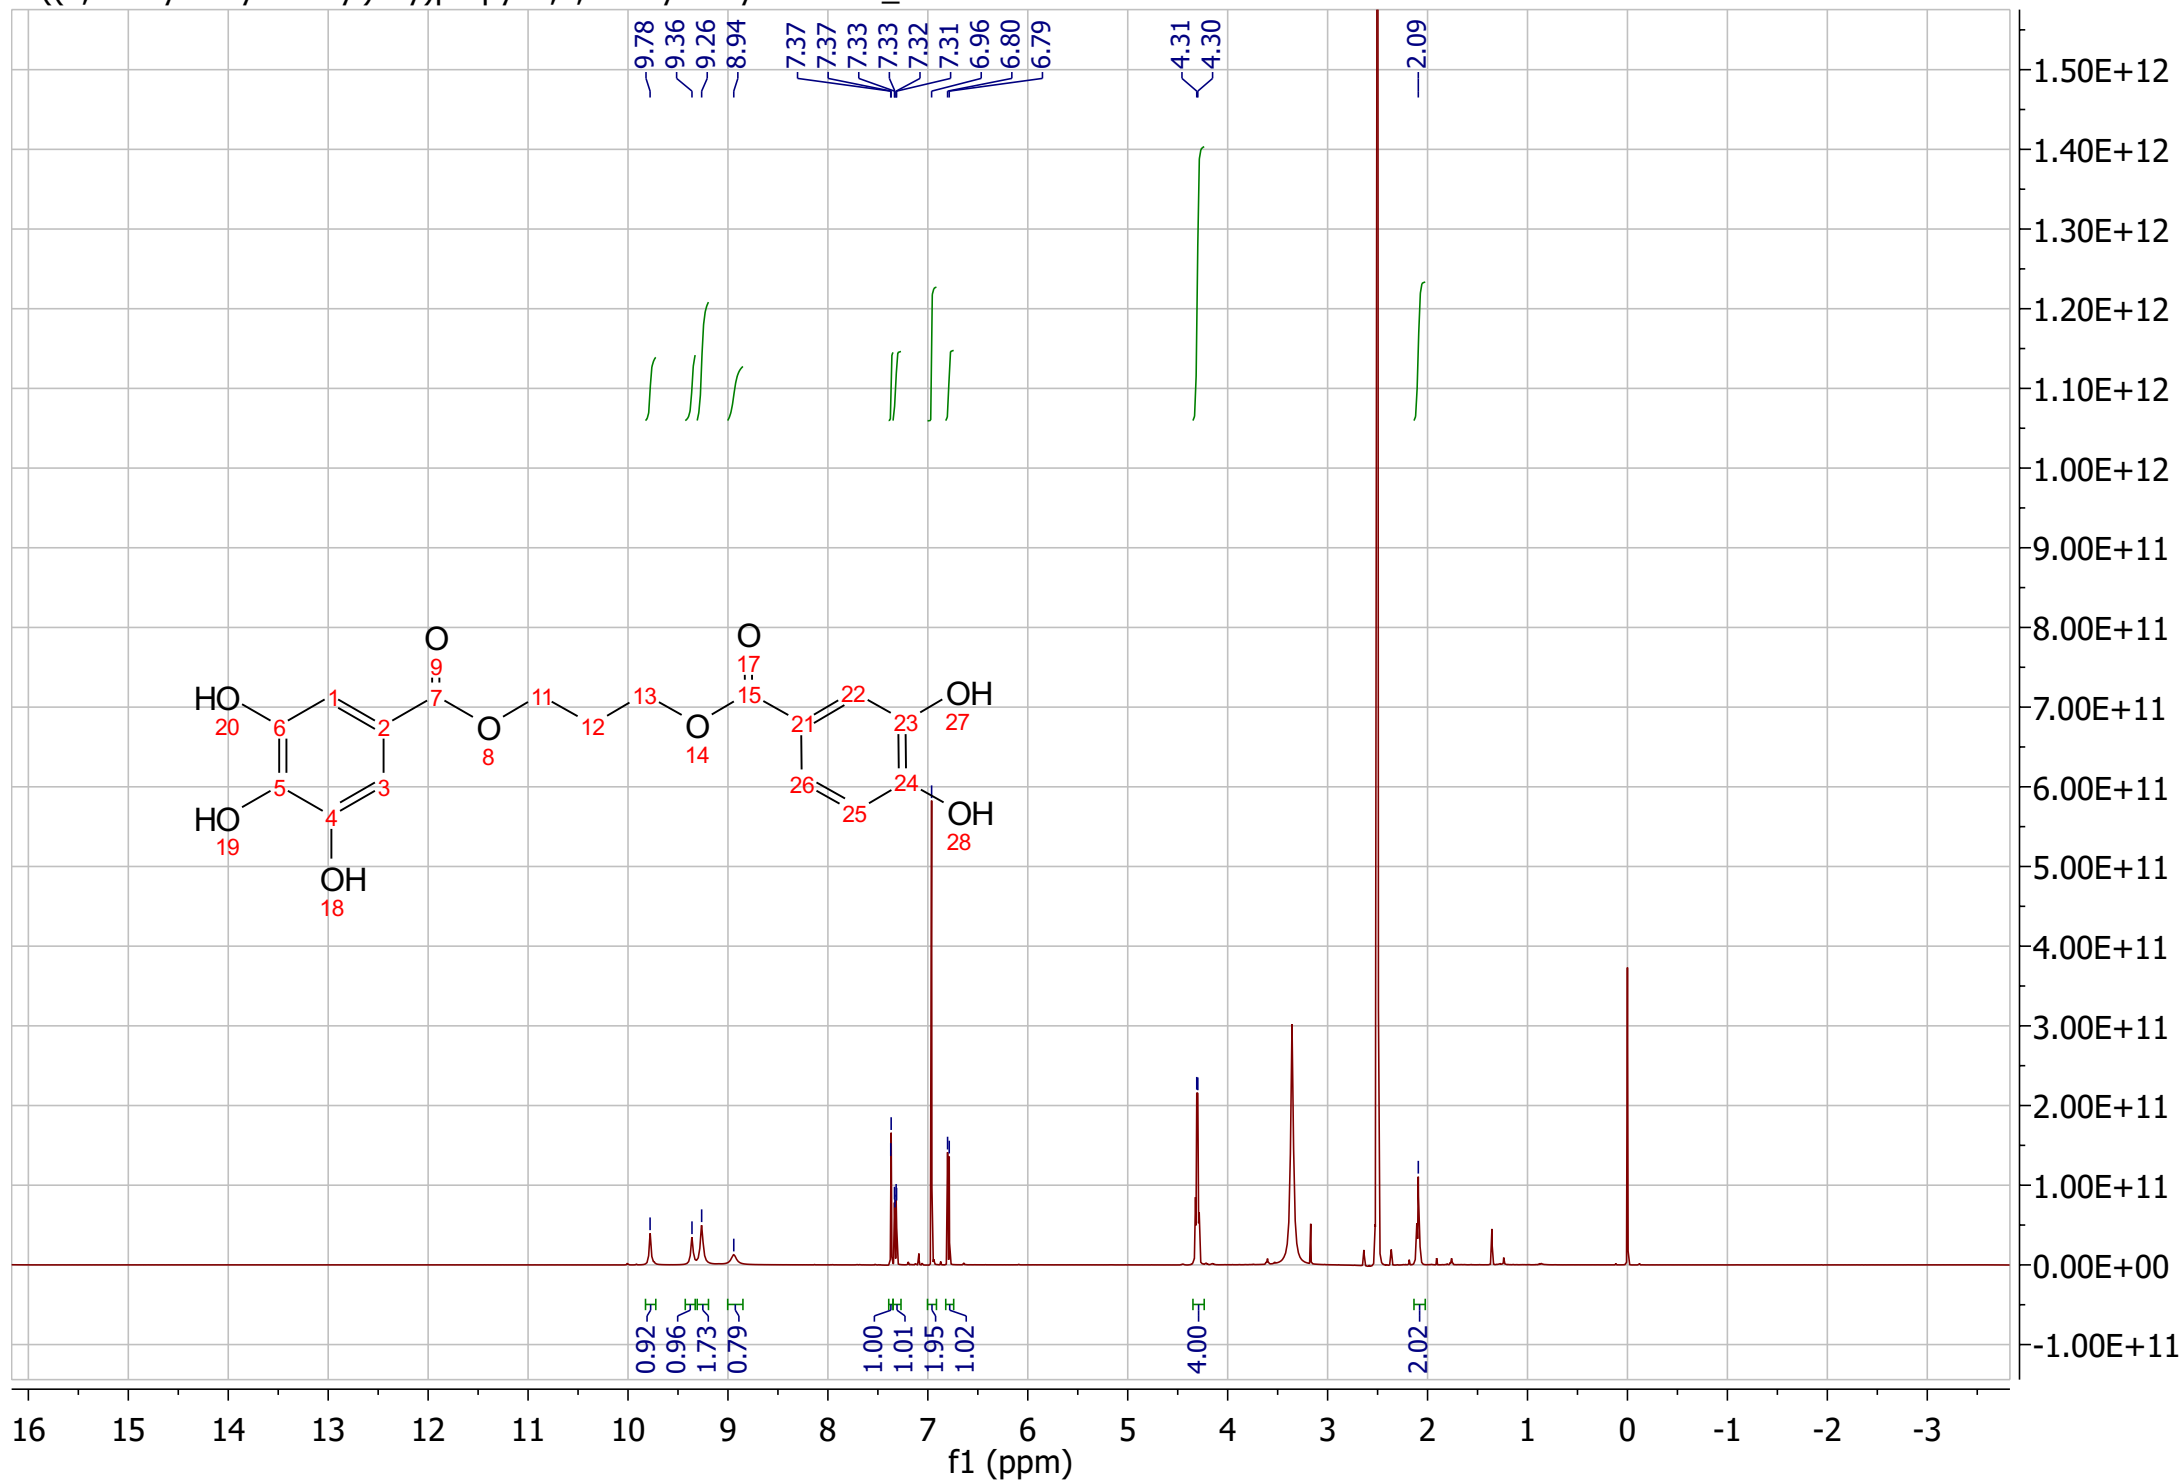

3-((3,4-dihydroxybenzoyl)oxy)propyl 3,4,5-trihydroxybenzoate\_DMSO

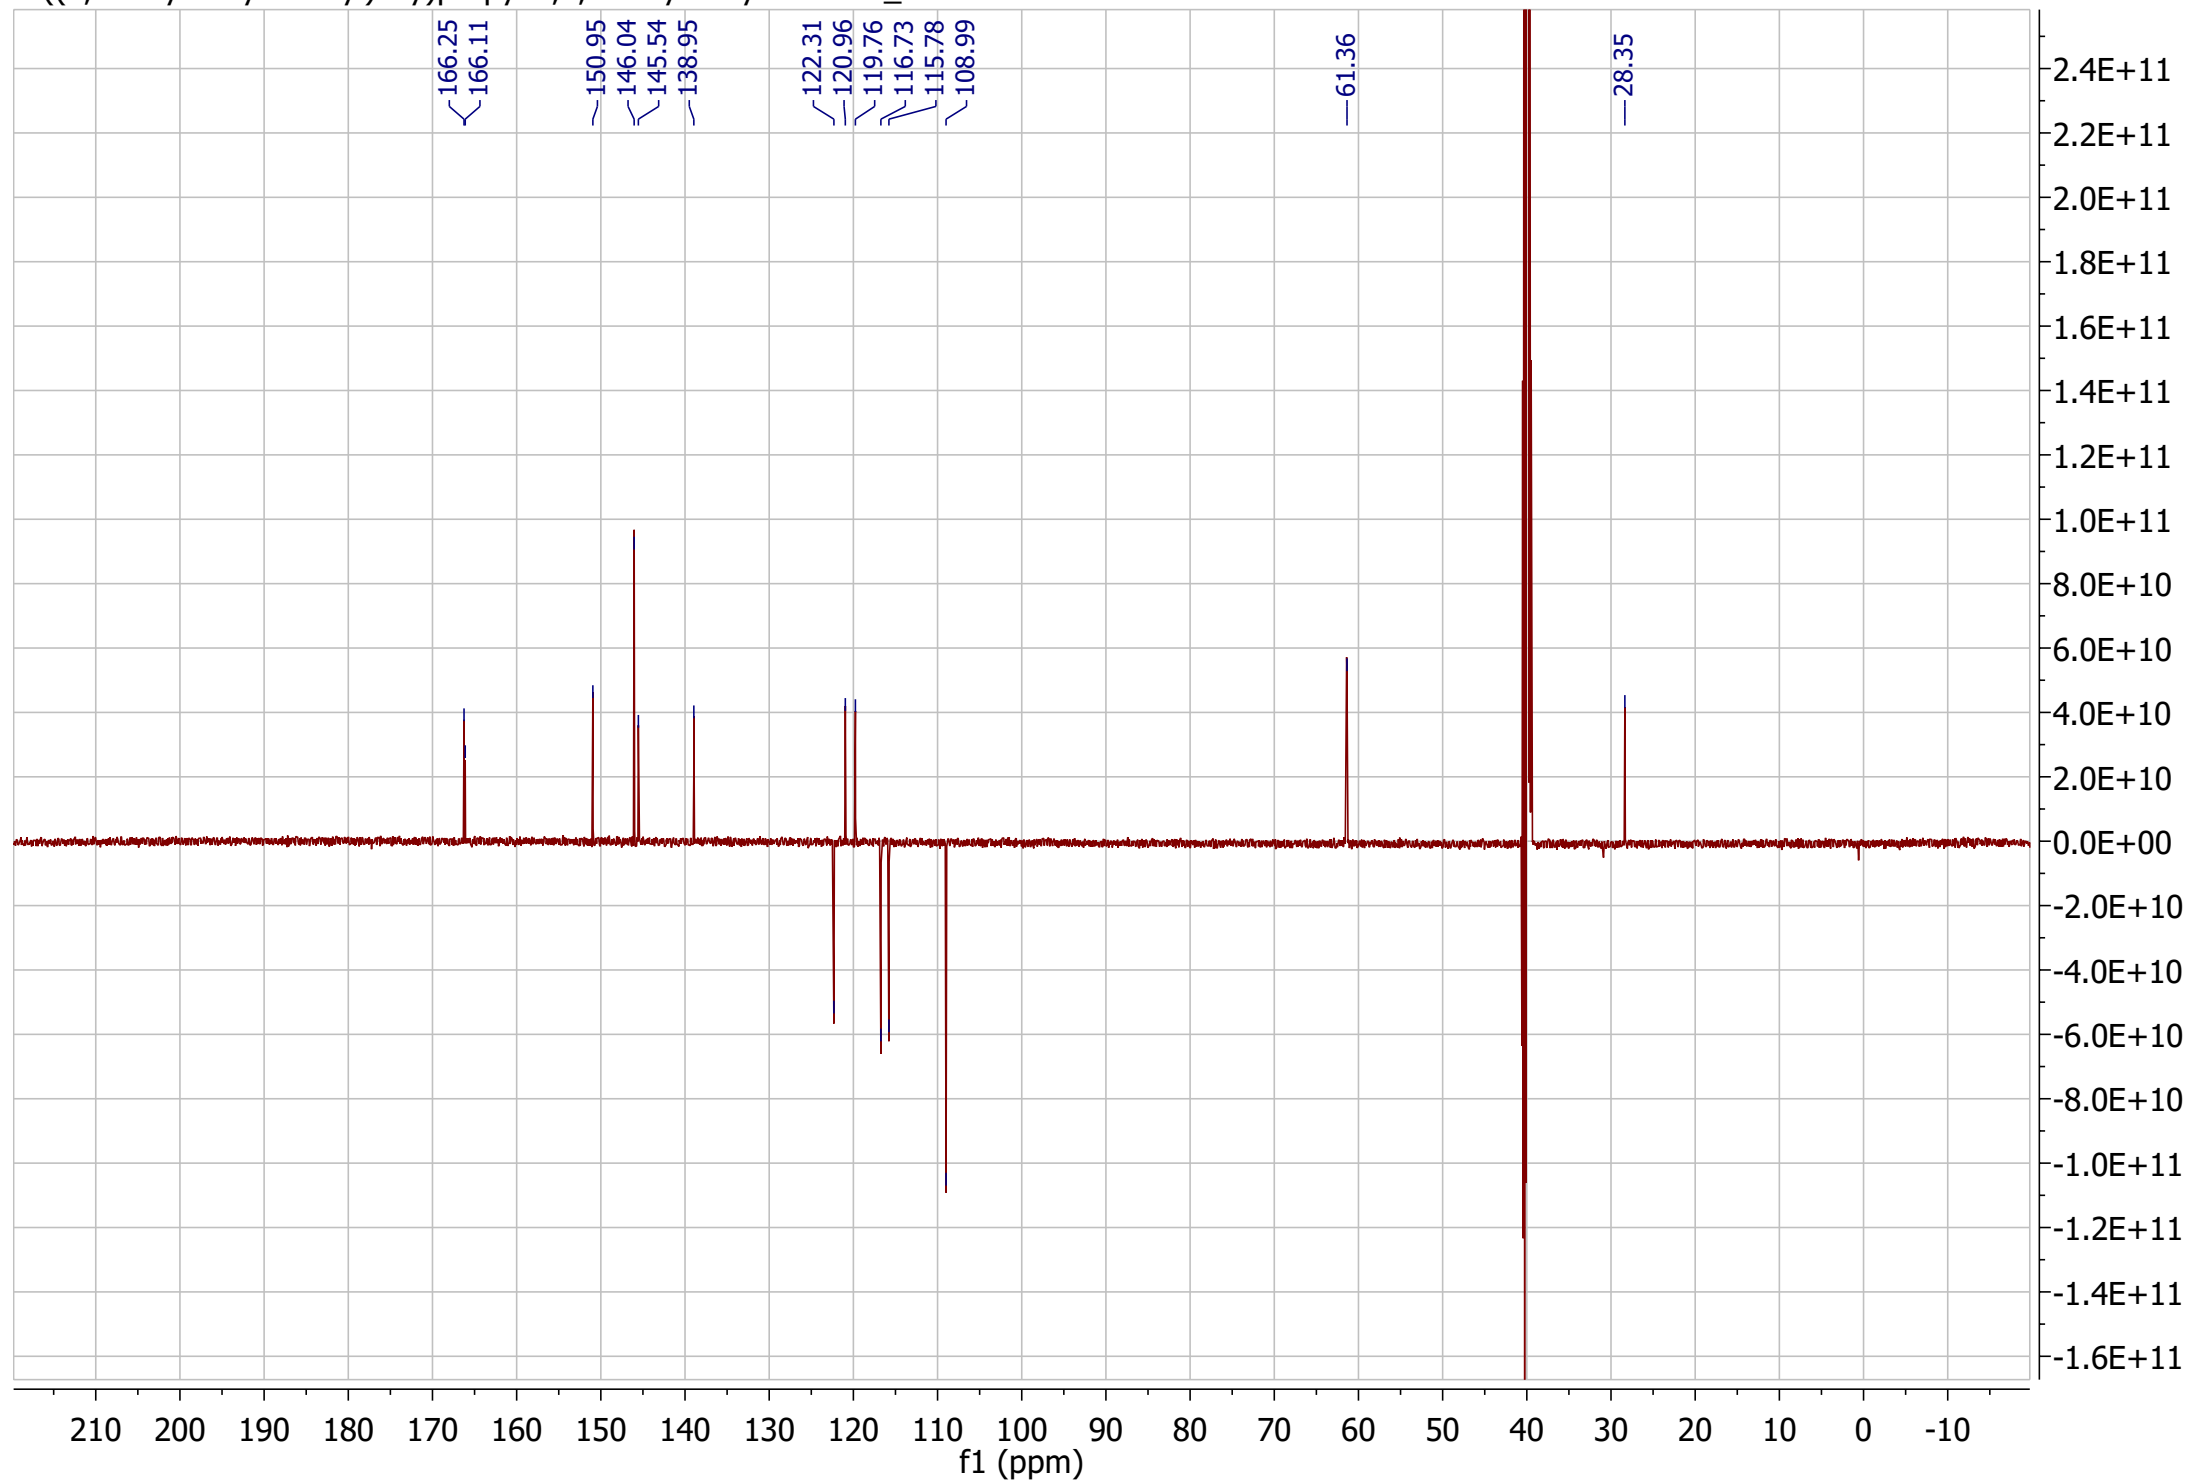

3-((3,5-dihydroxybenzoyl)oxy)propyl 3,4,5-trihydroxybenzoate\_DMSO

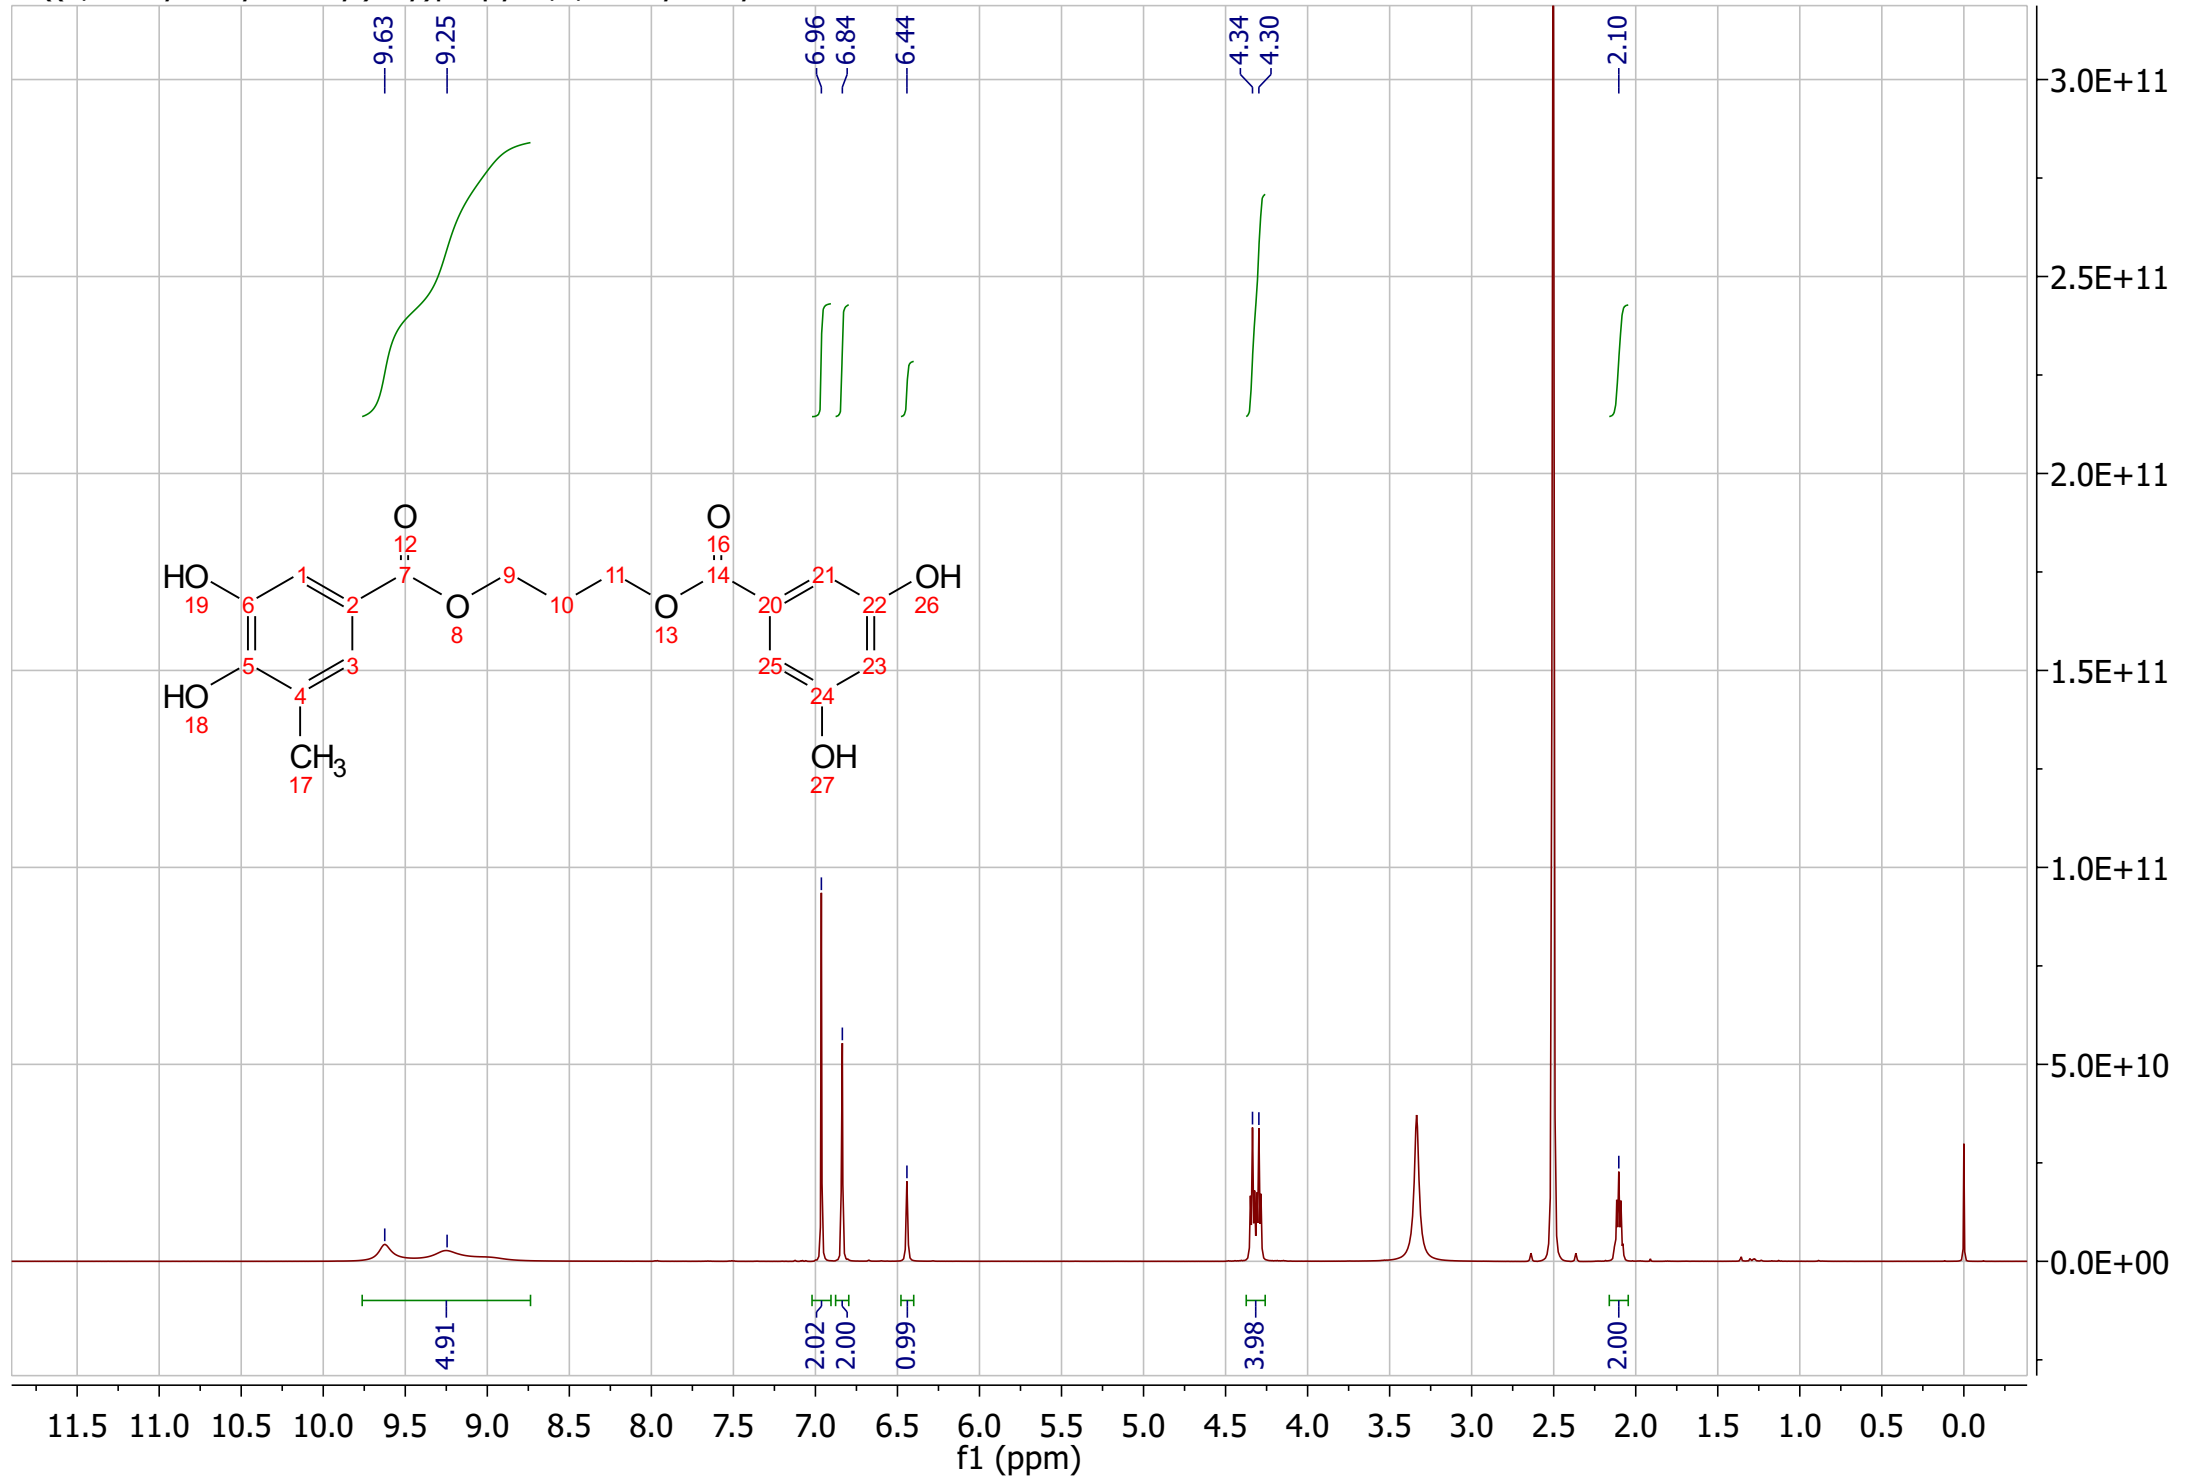



3-((3,5-dihydroxybenzoyl)oxy)propyl 3,4,5-trihydroxybenzoate\_DMSO

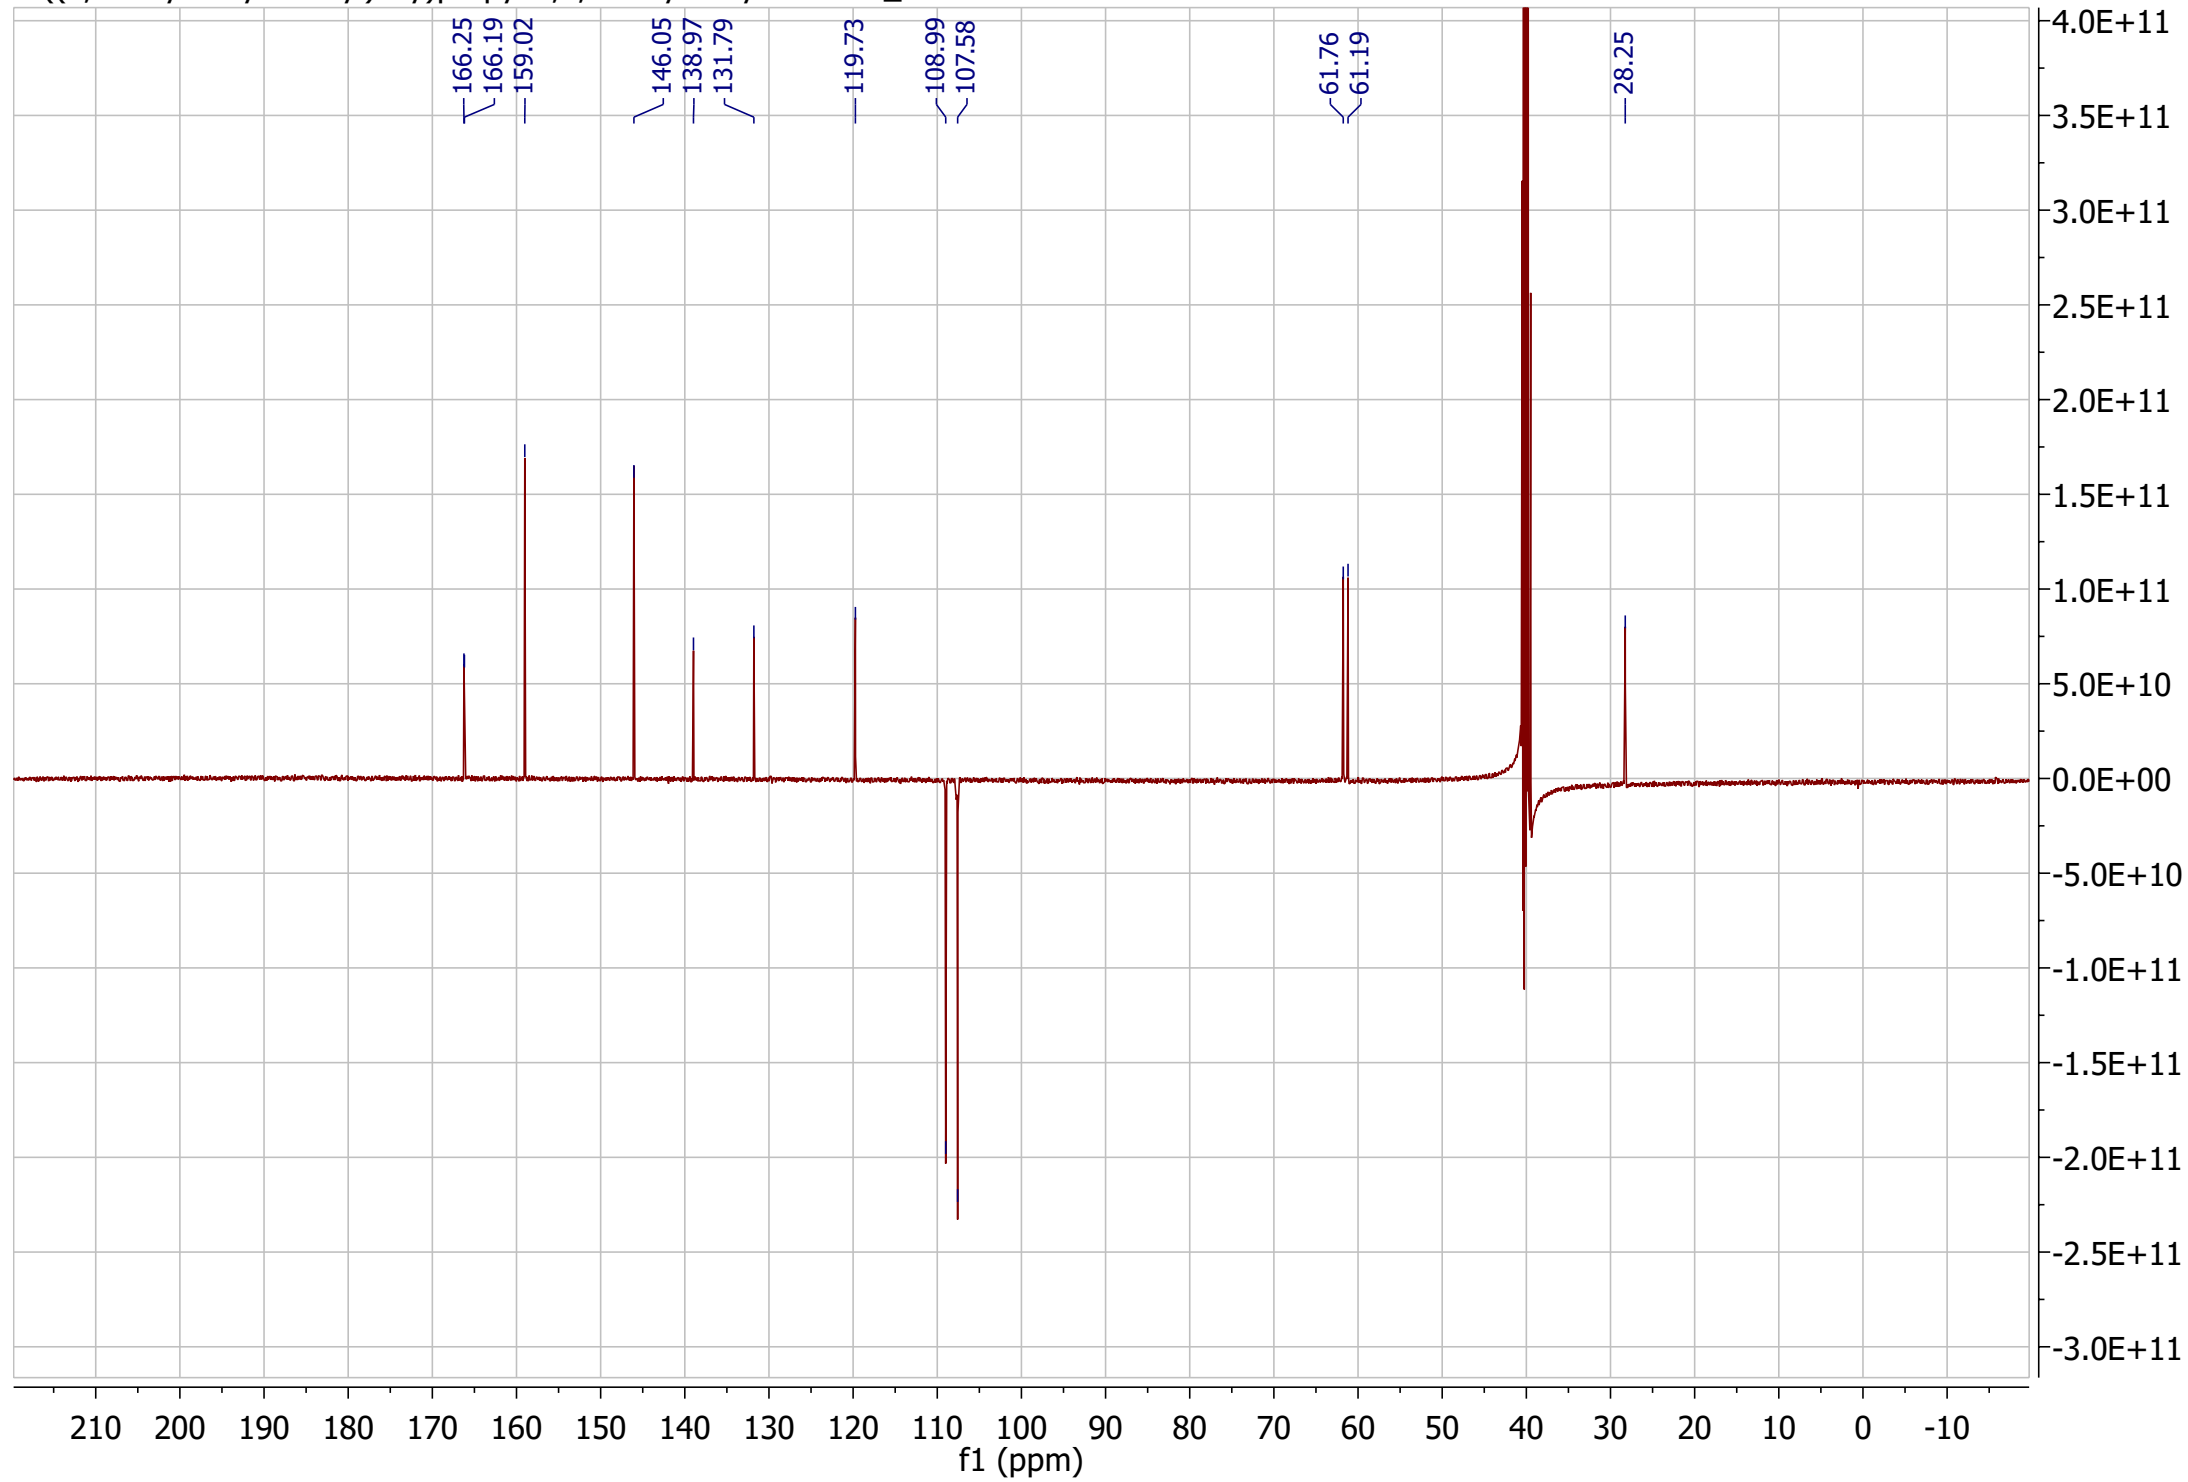

3-(benzyloxy)propyl-3,4,5-trihydroxybenzoate\_DMSO

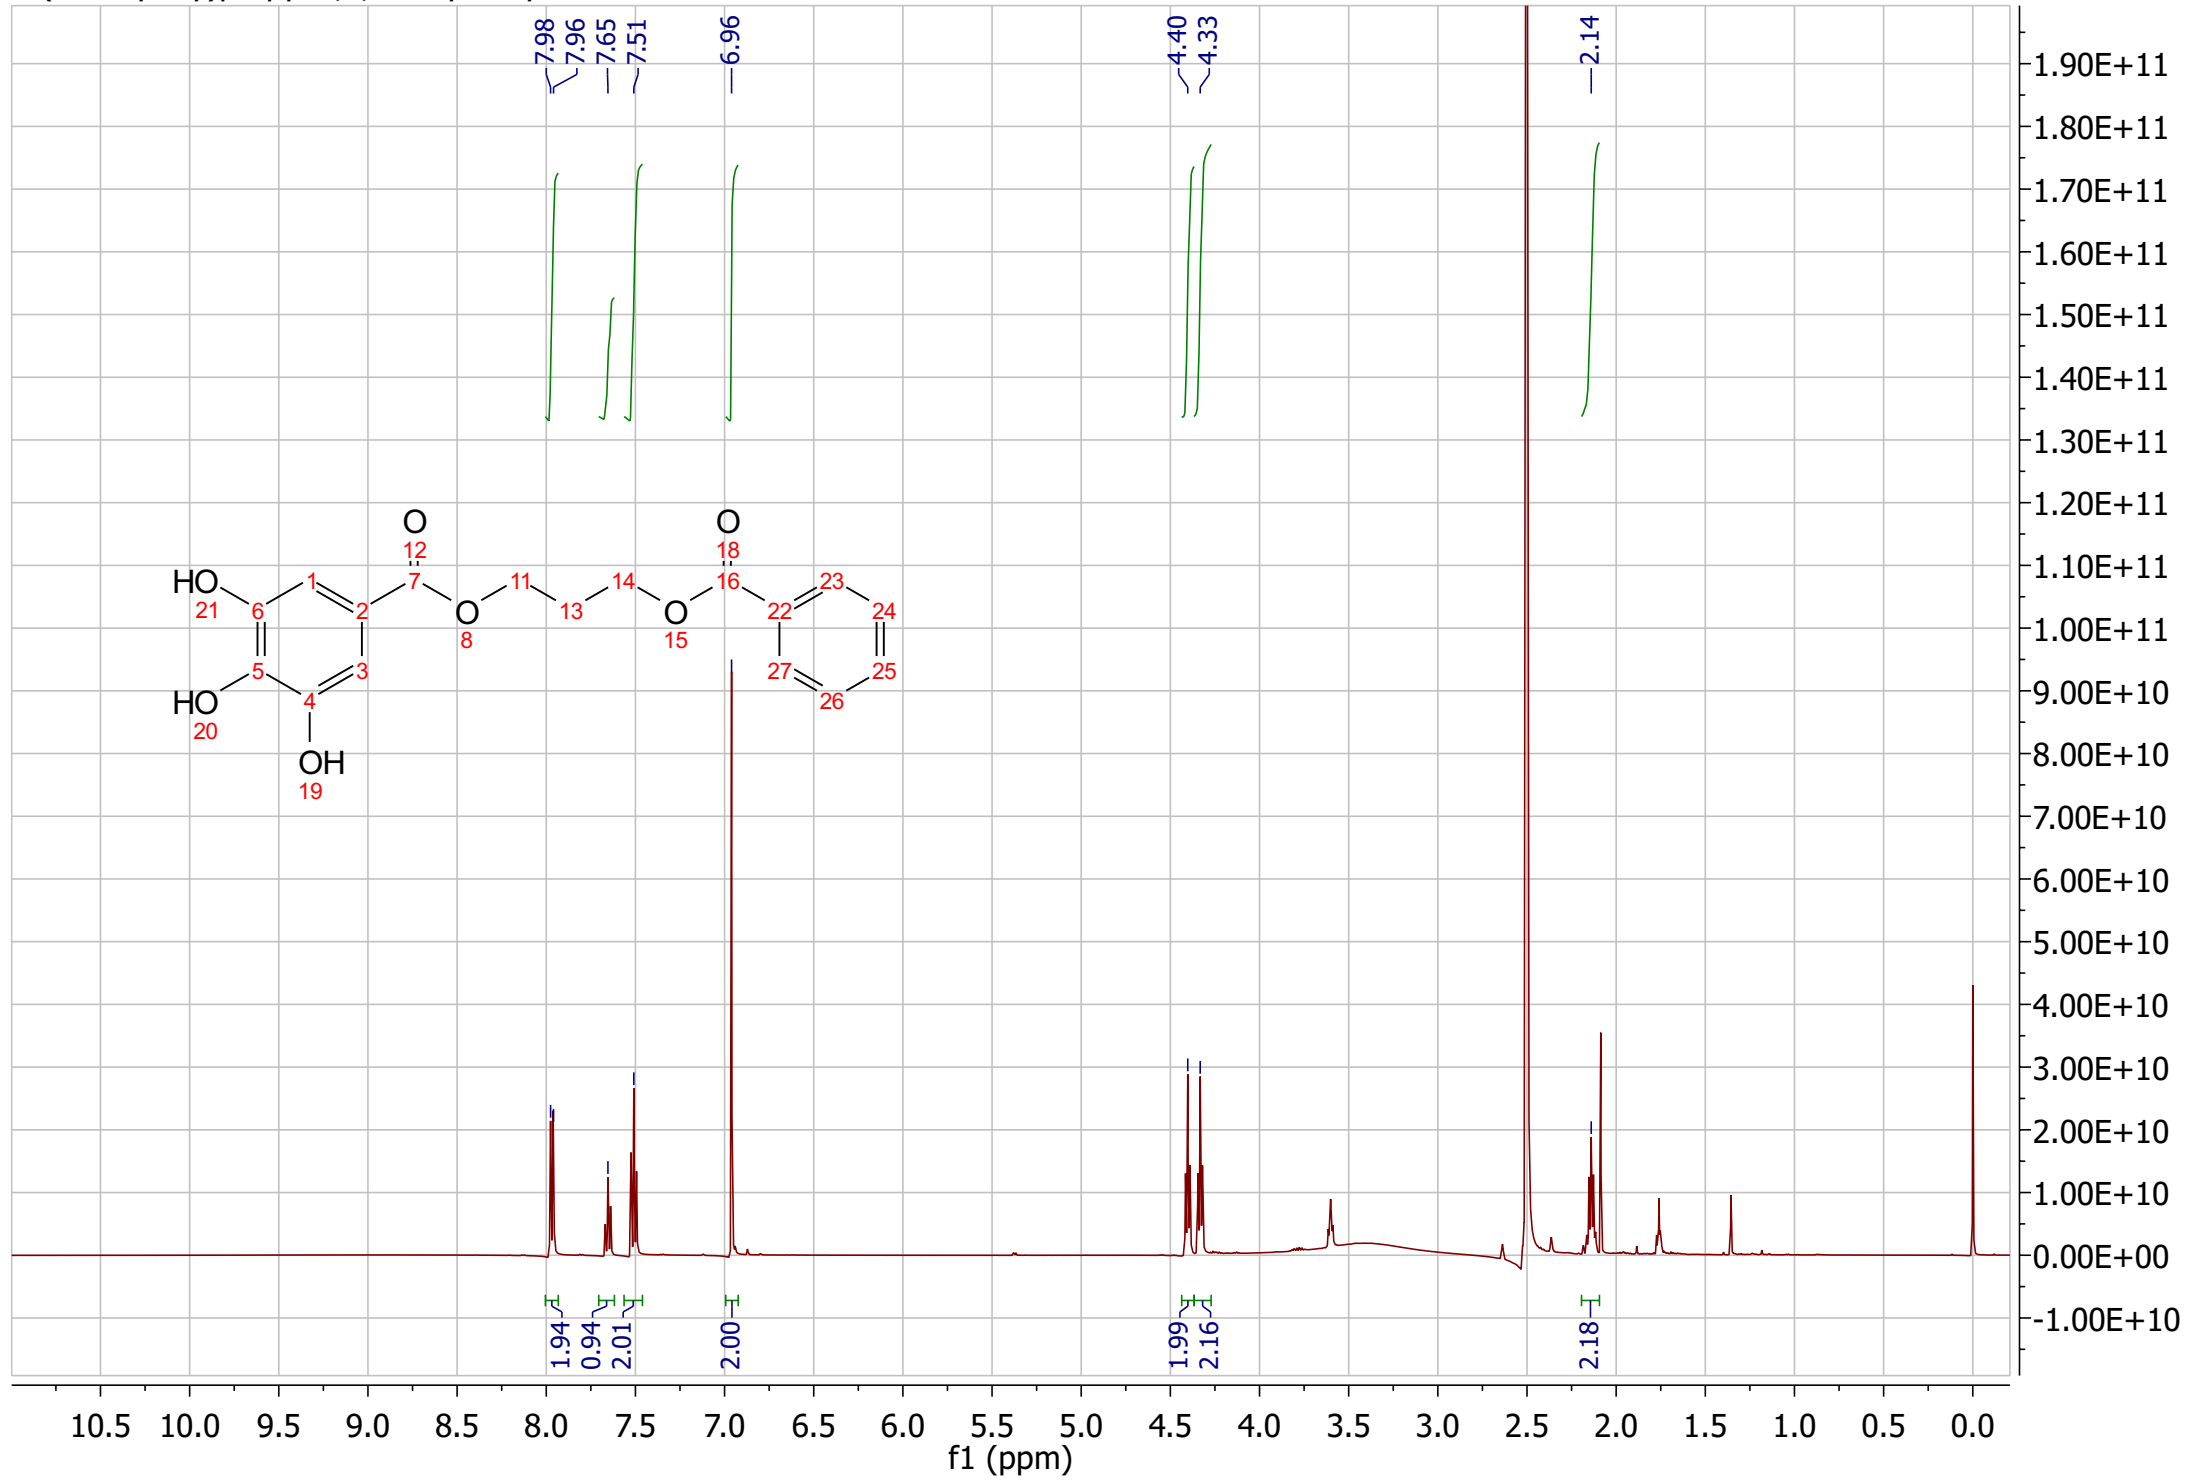

3-(benzyloxy)propyl-3,4,5-trihydroxybenzoate\_DMSO

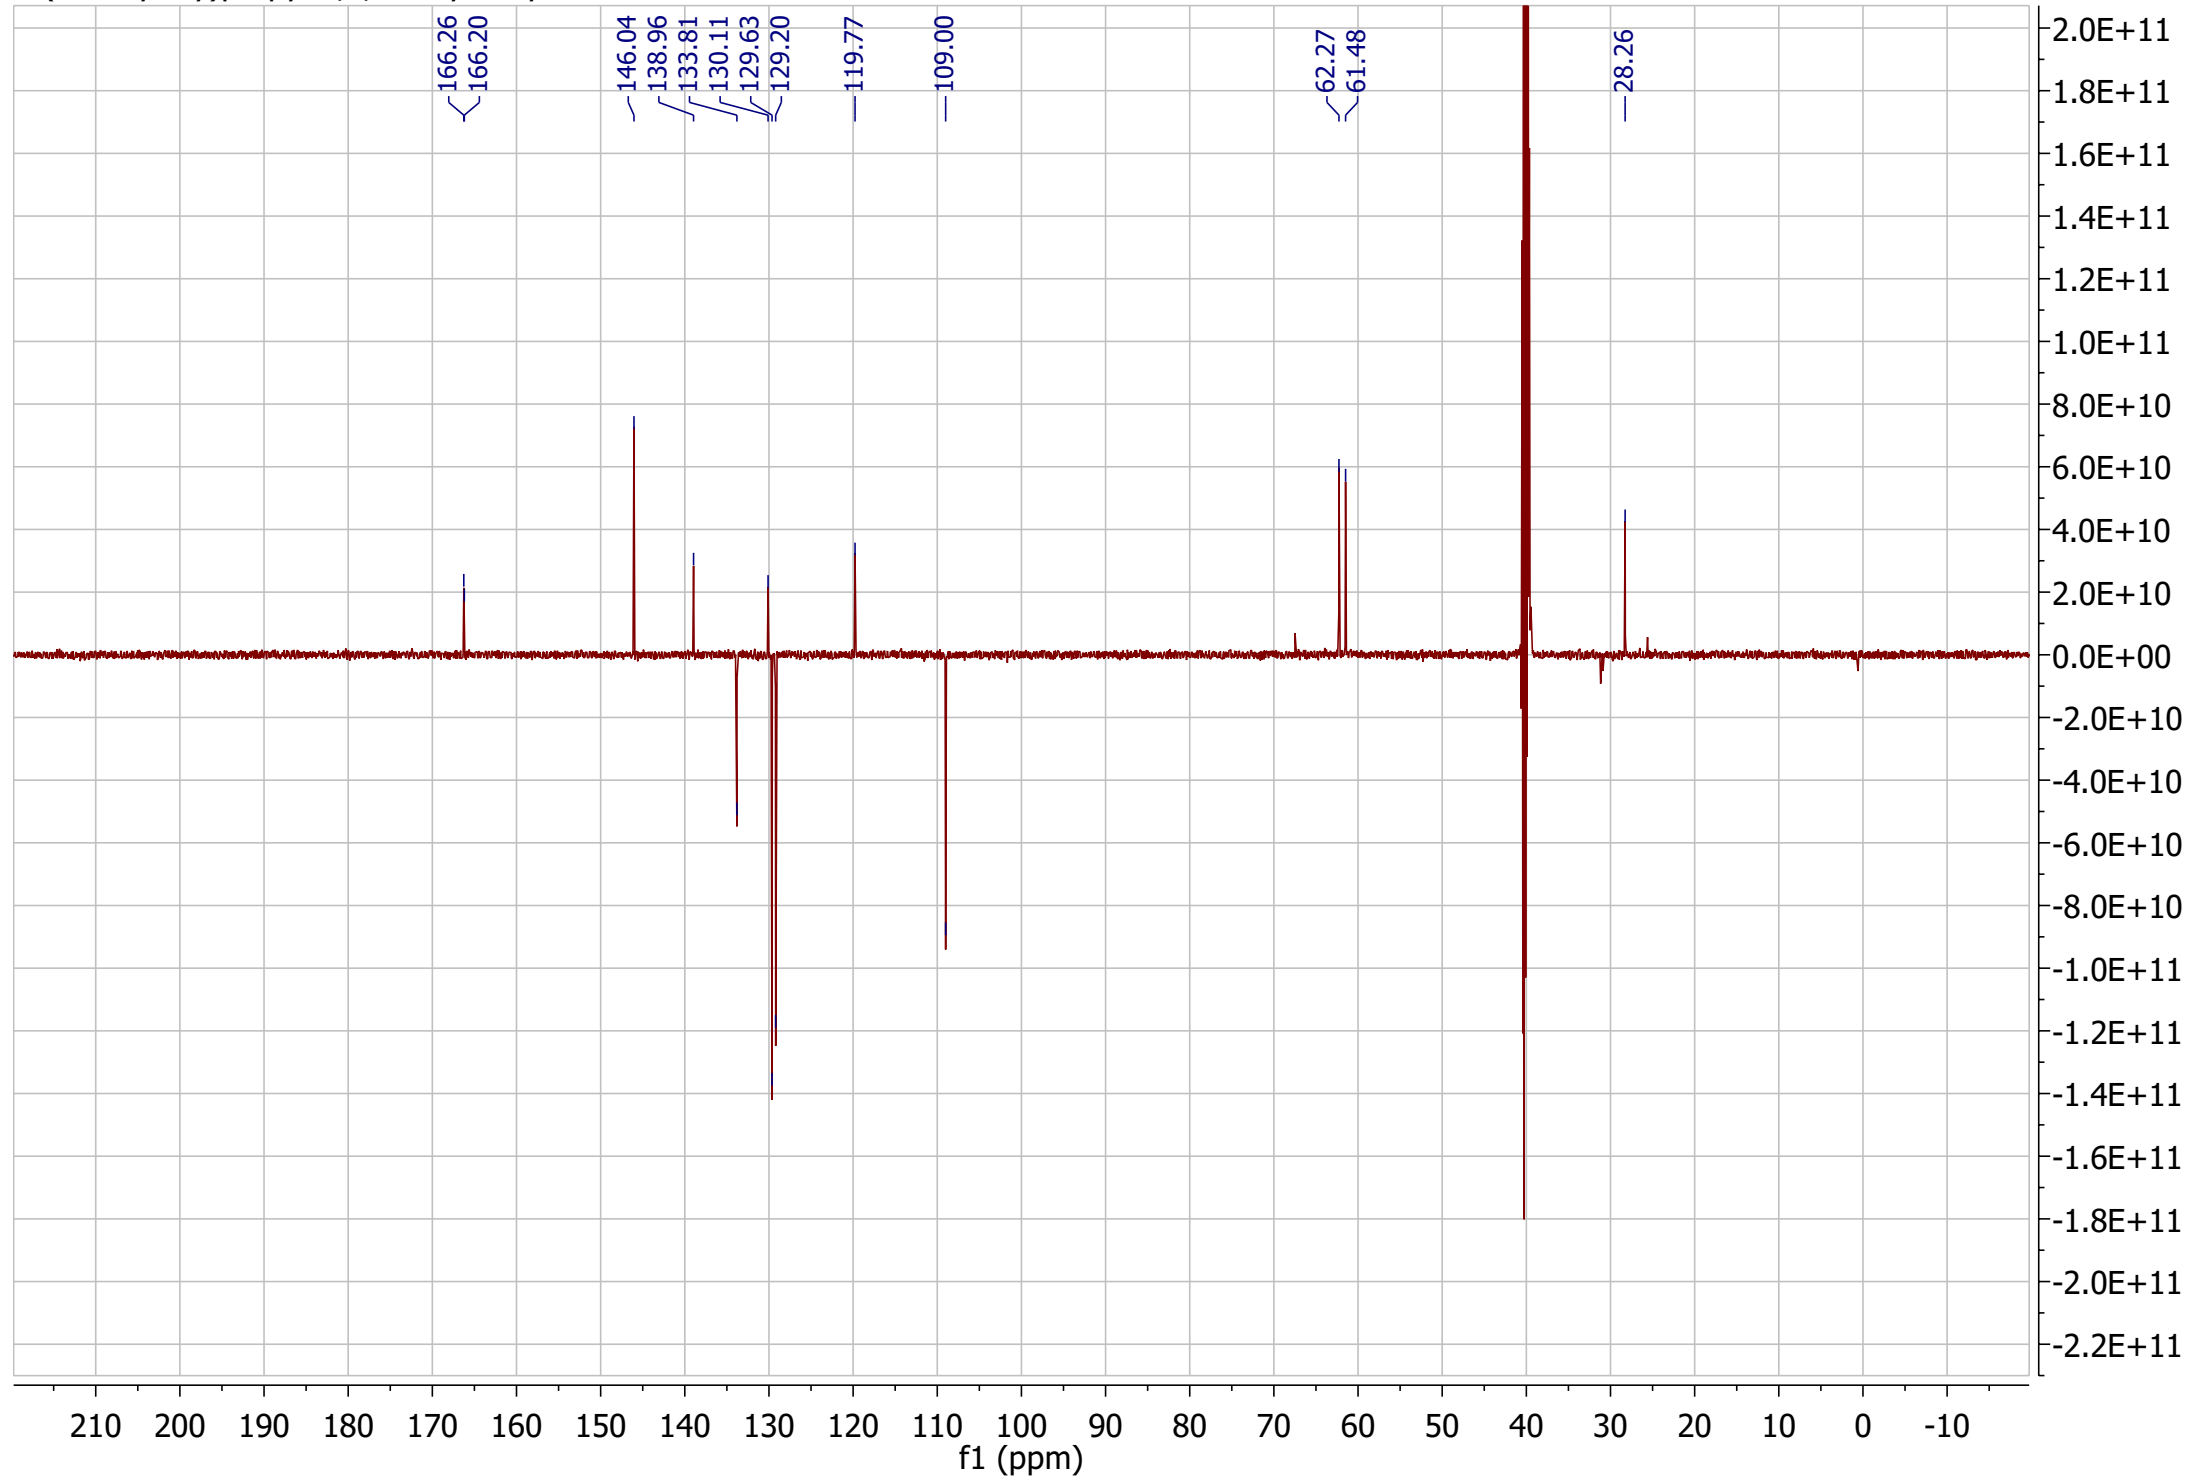

Propane-1,3-diyl dibenzoate\_CDC3

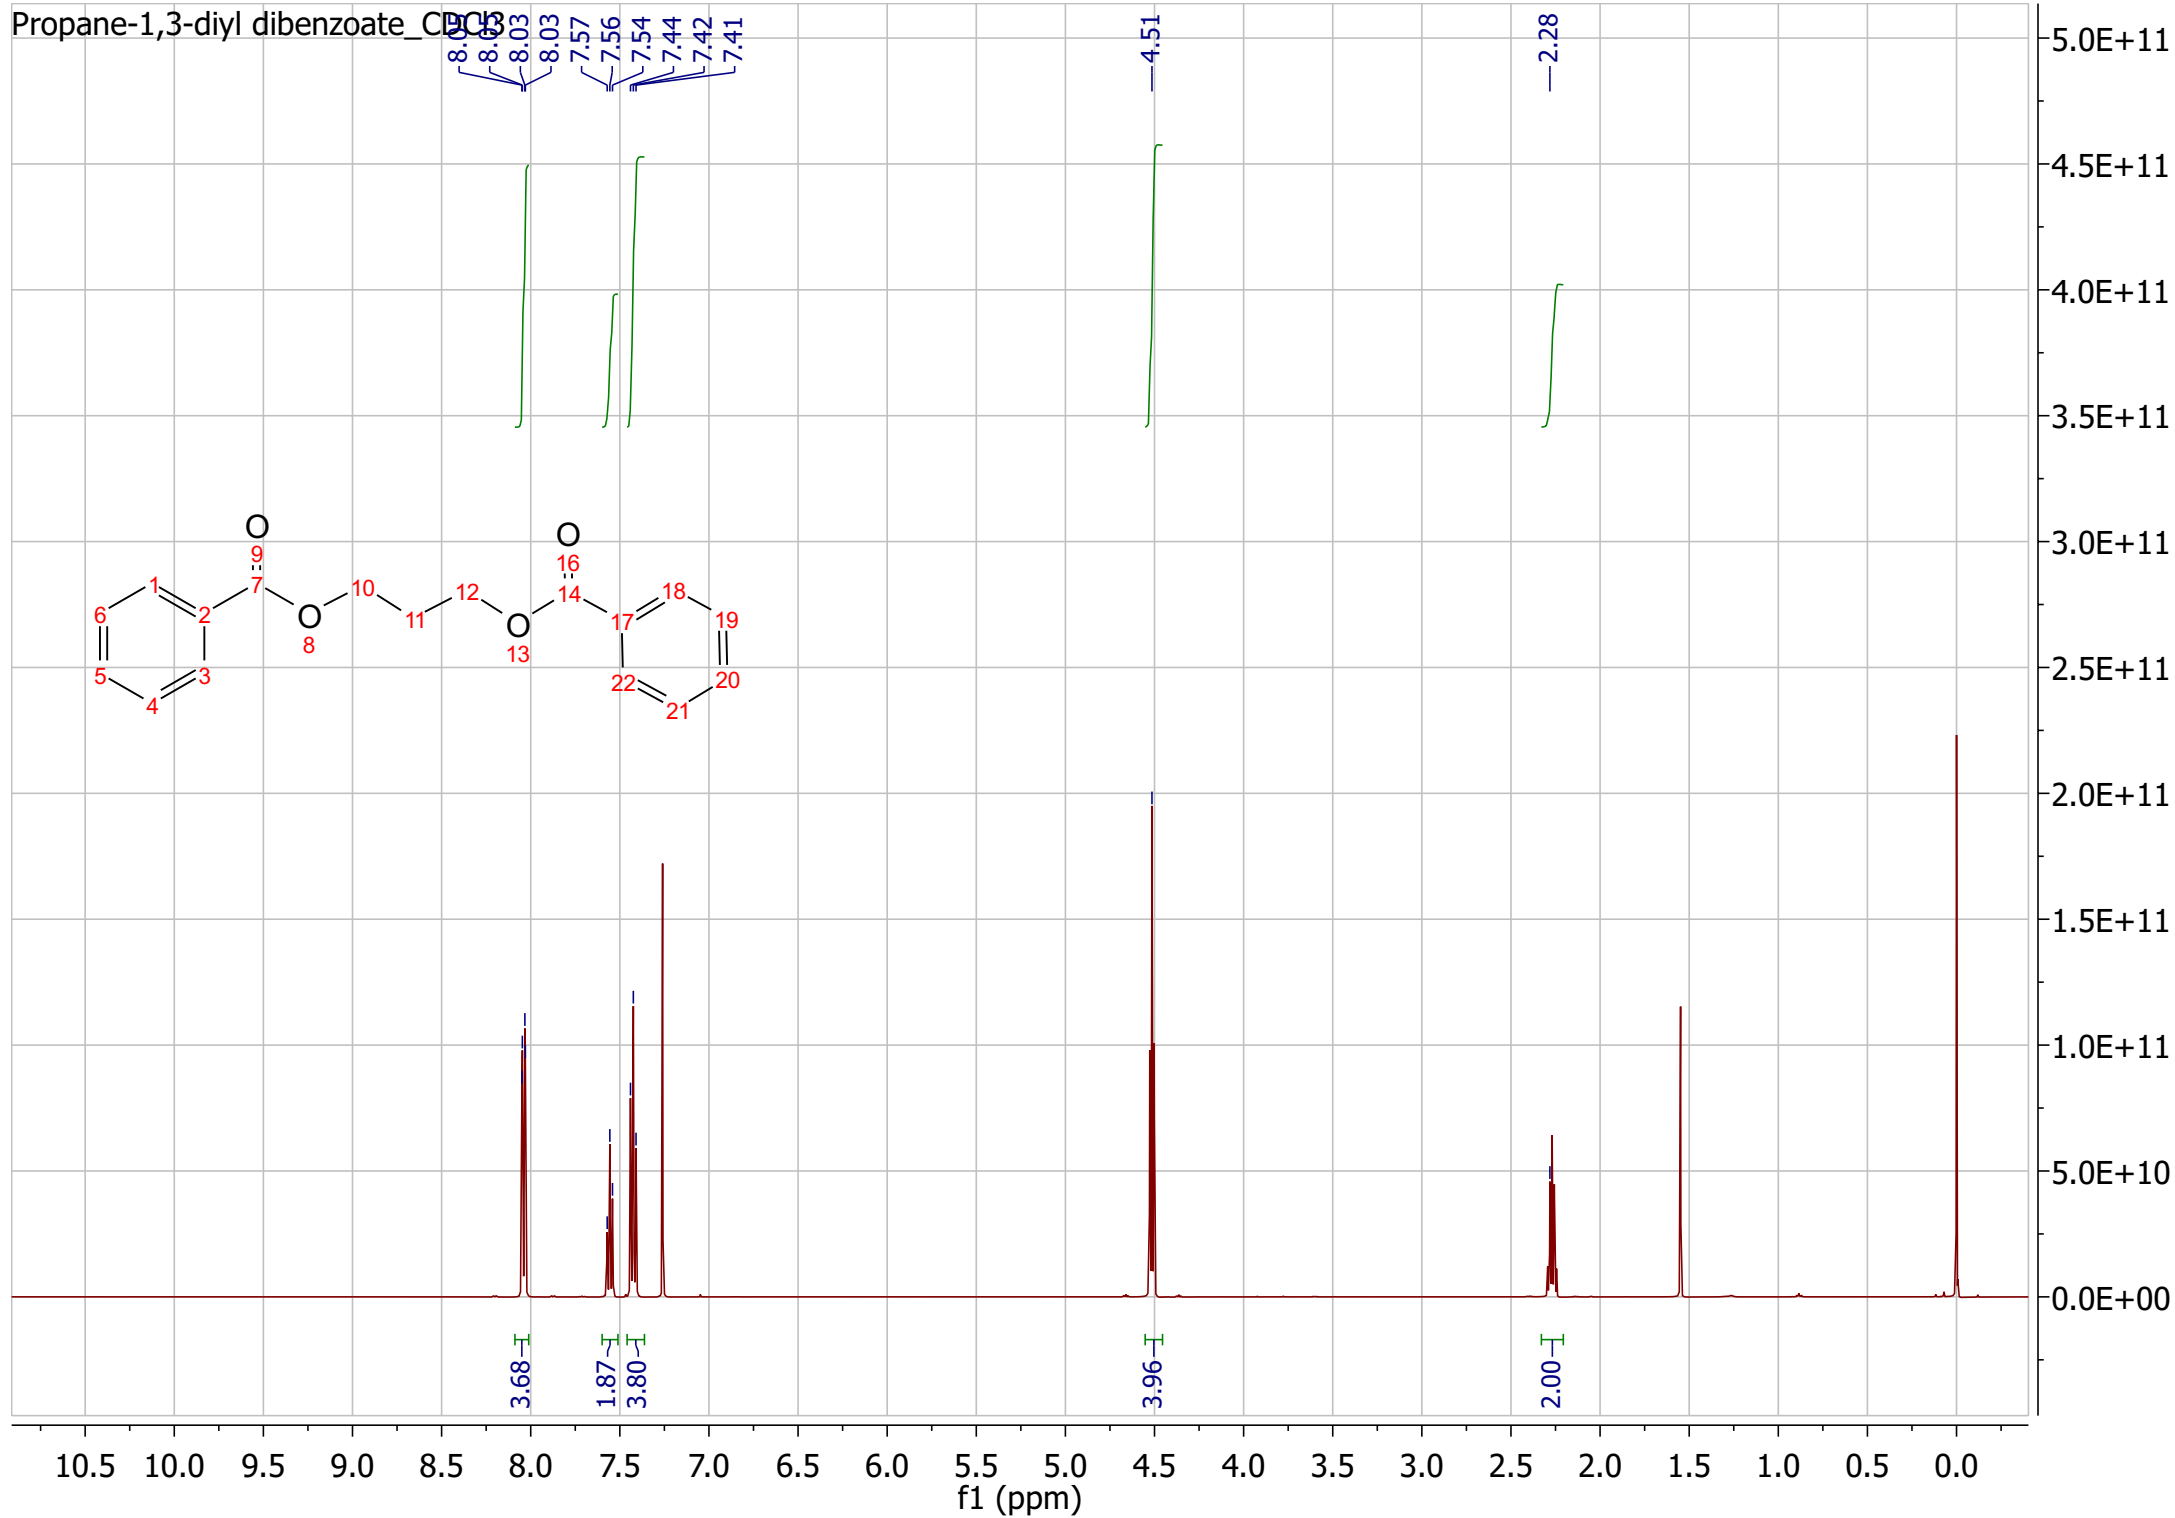

Propane-1,3-diyl dibenzoate\_CDCl3

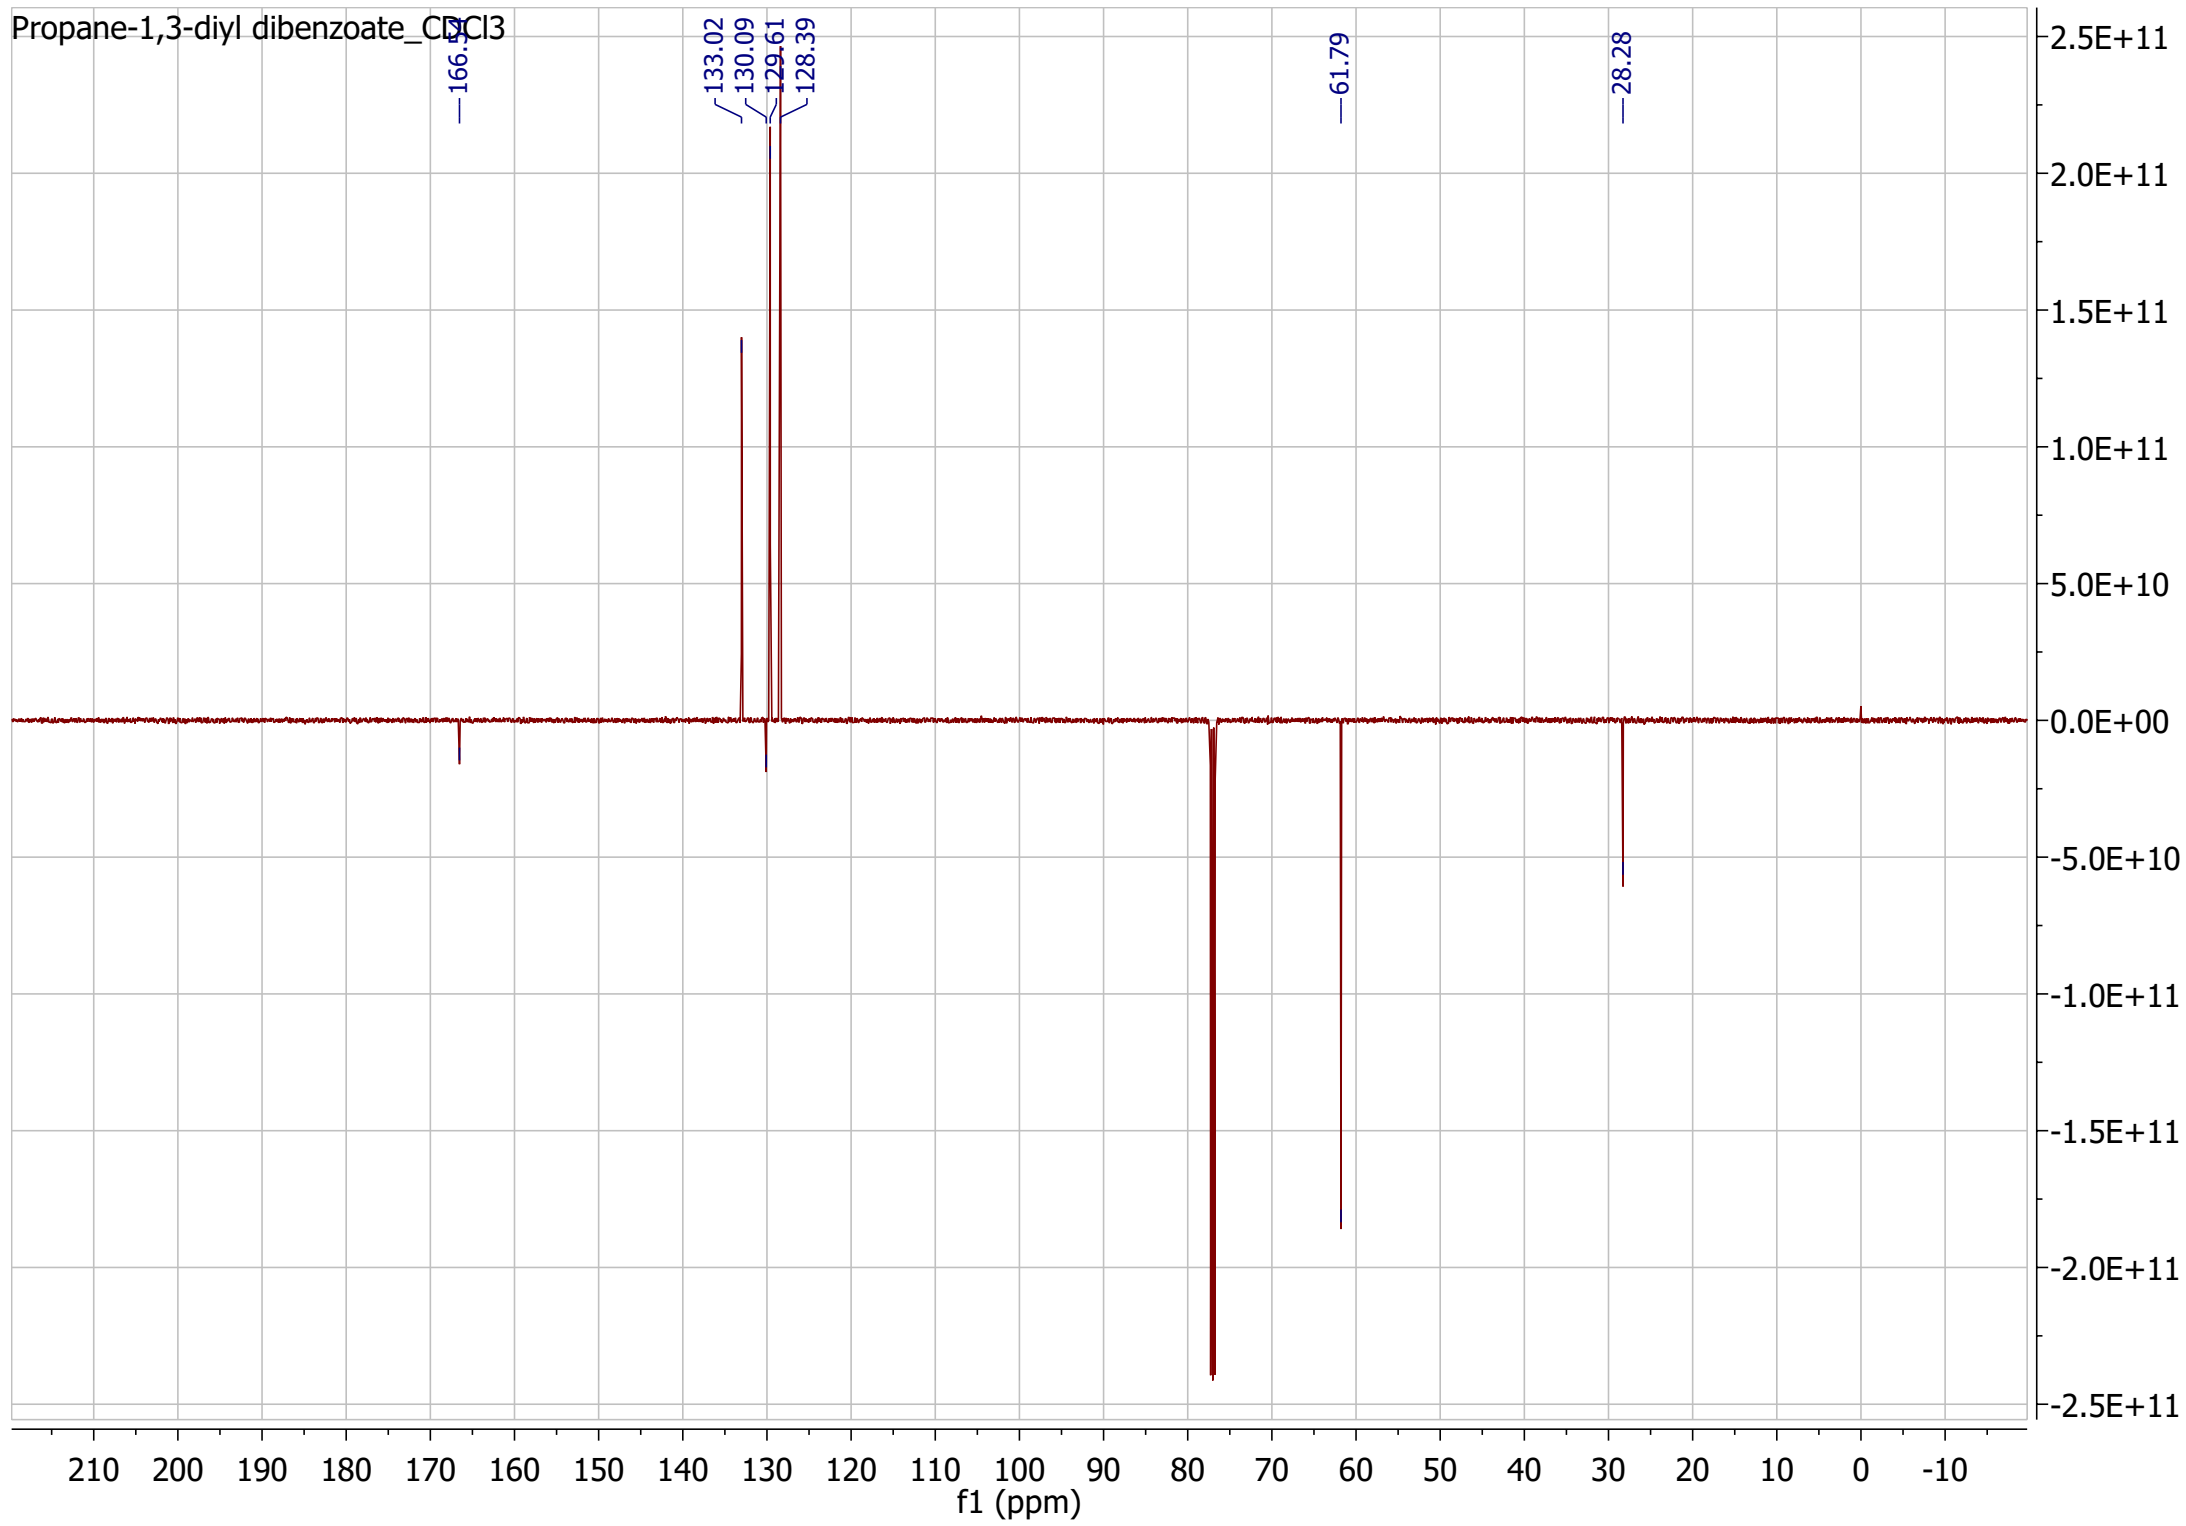

3-(3,4,5-trihydroxybenzamido)propyl 3,4,5-trihydroxybenzoate\_DMSO

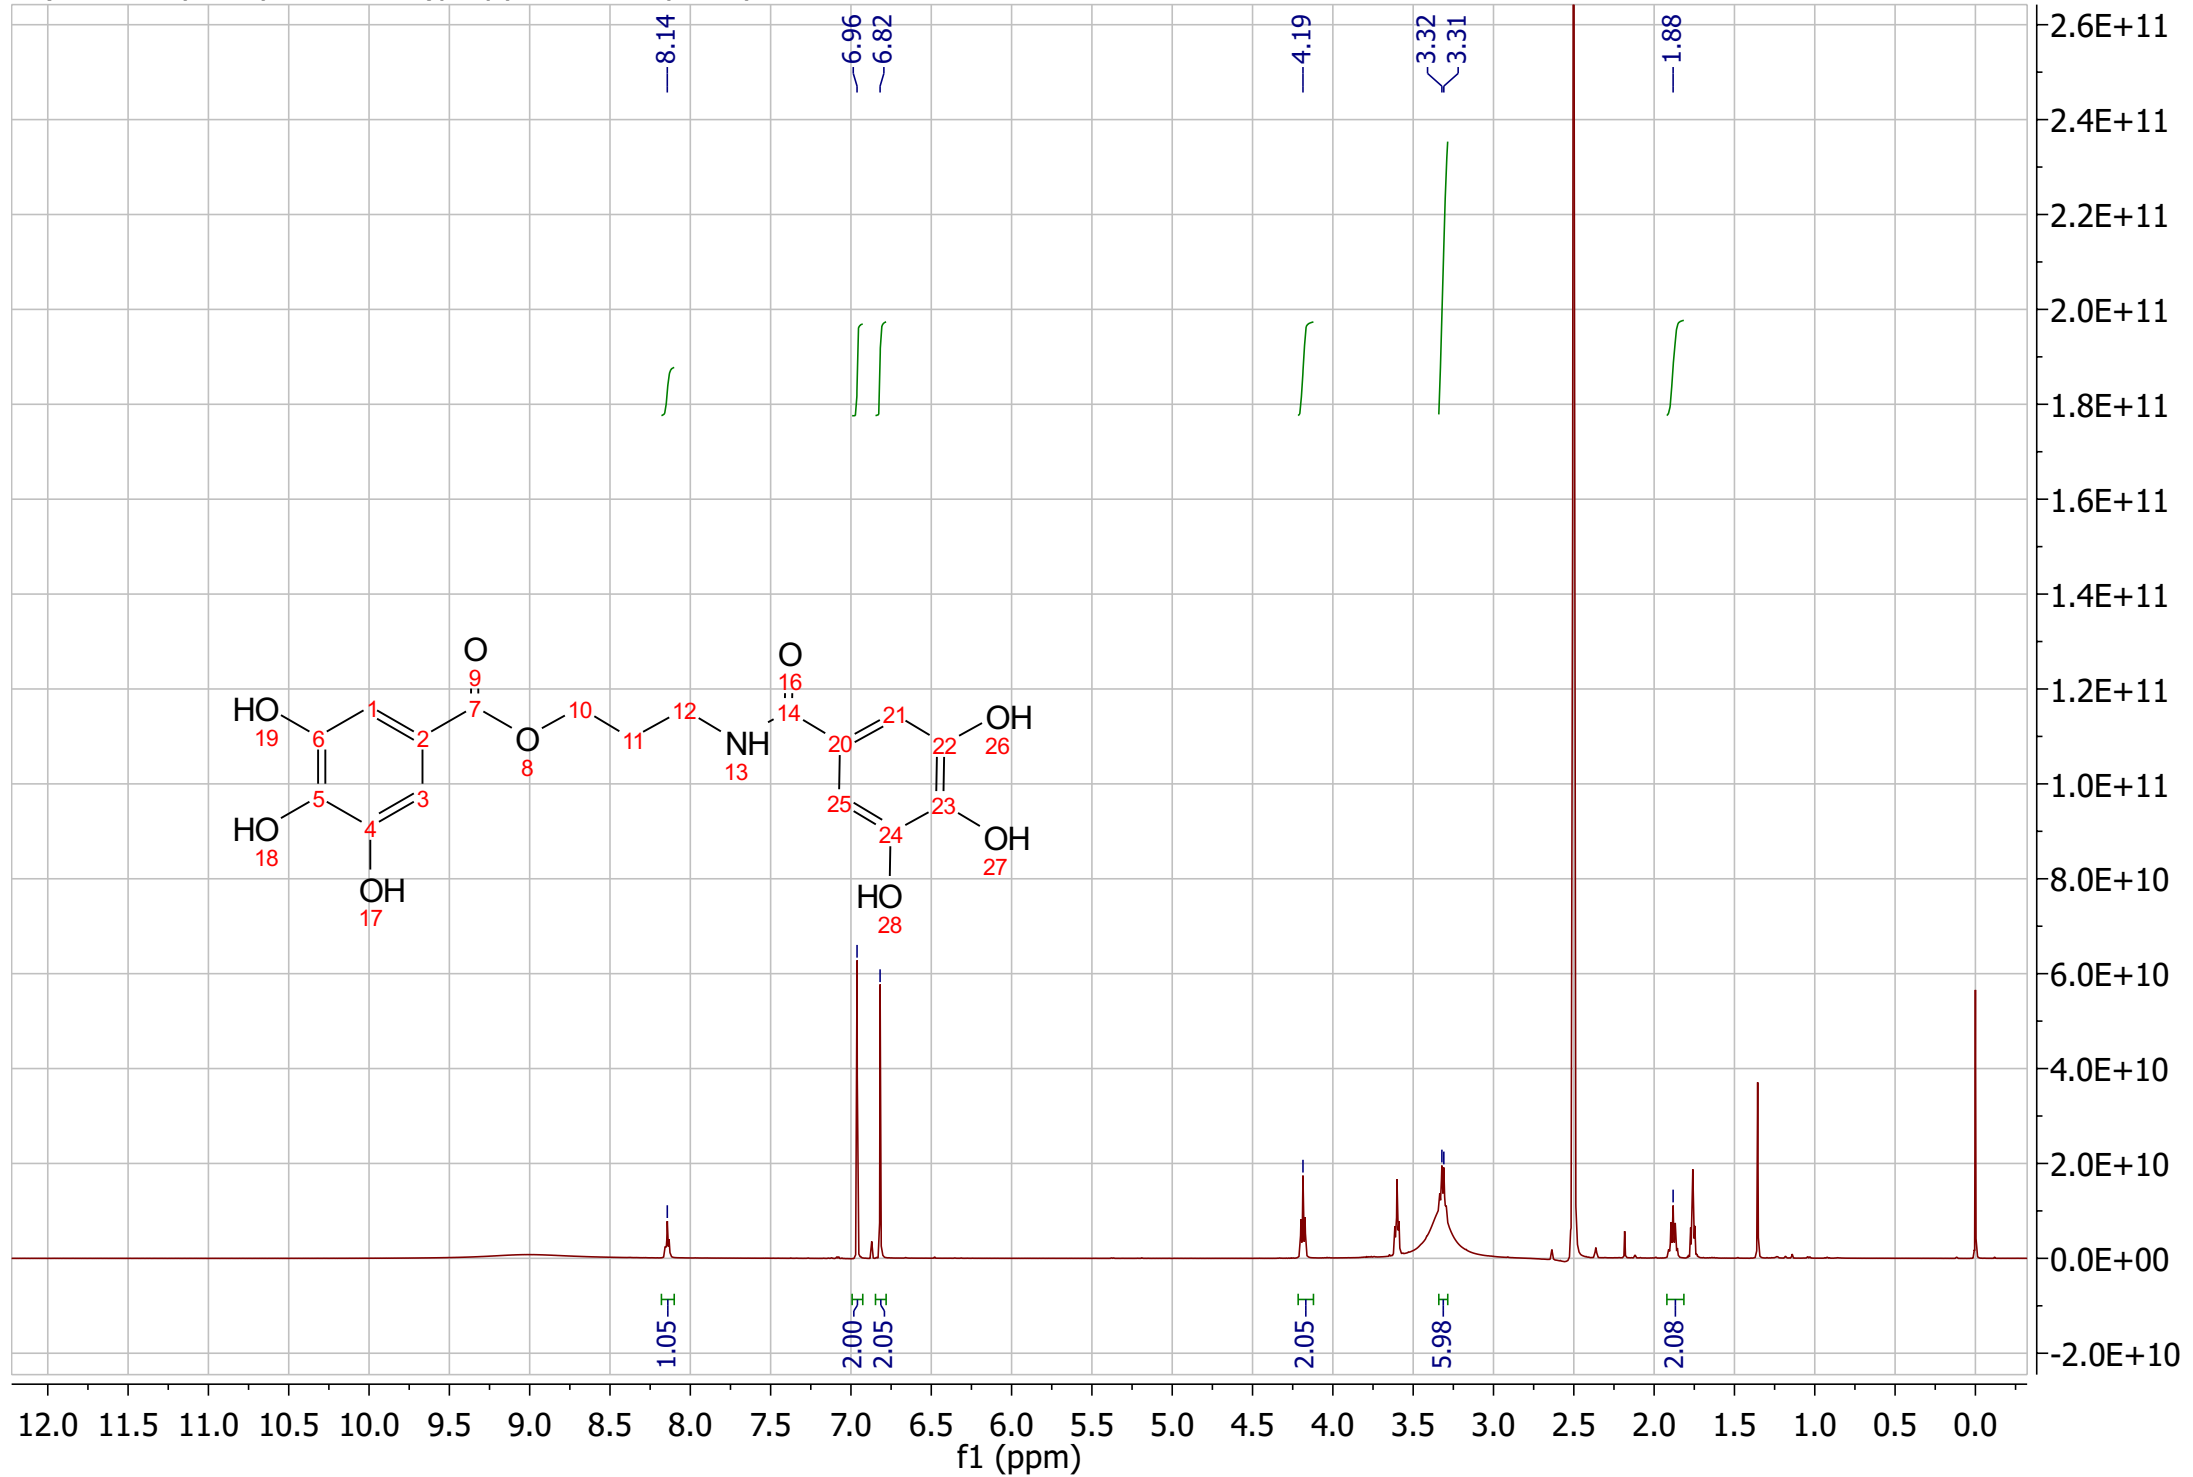

3-(3,4,5-trihydroxybenzamido)propyl 3,4,5-trihydroxybenzoate\_DMSO

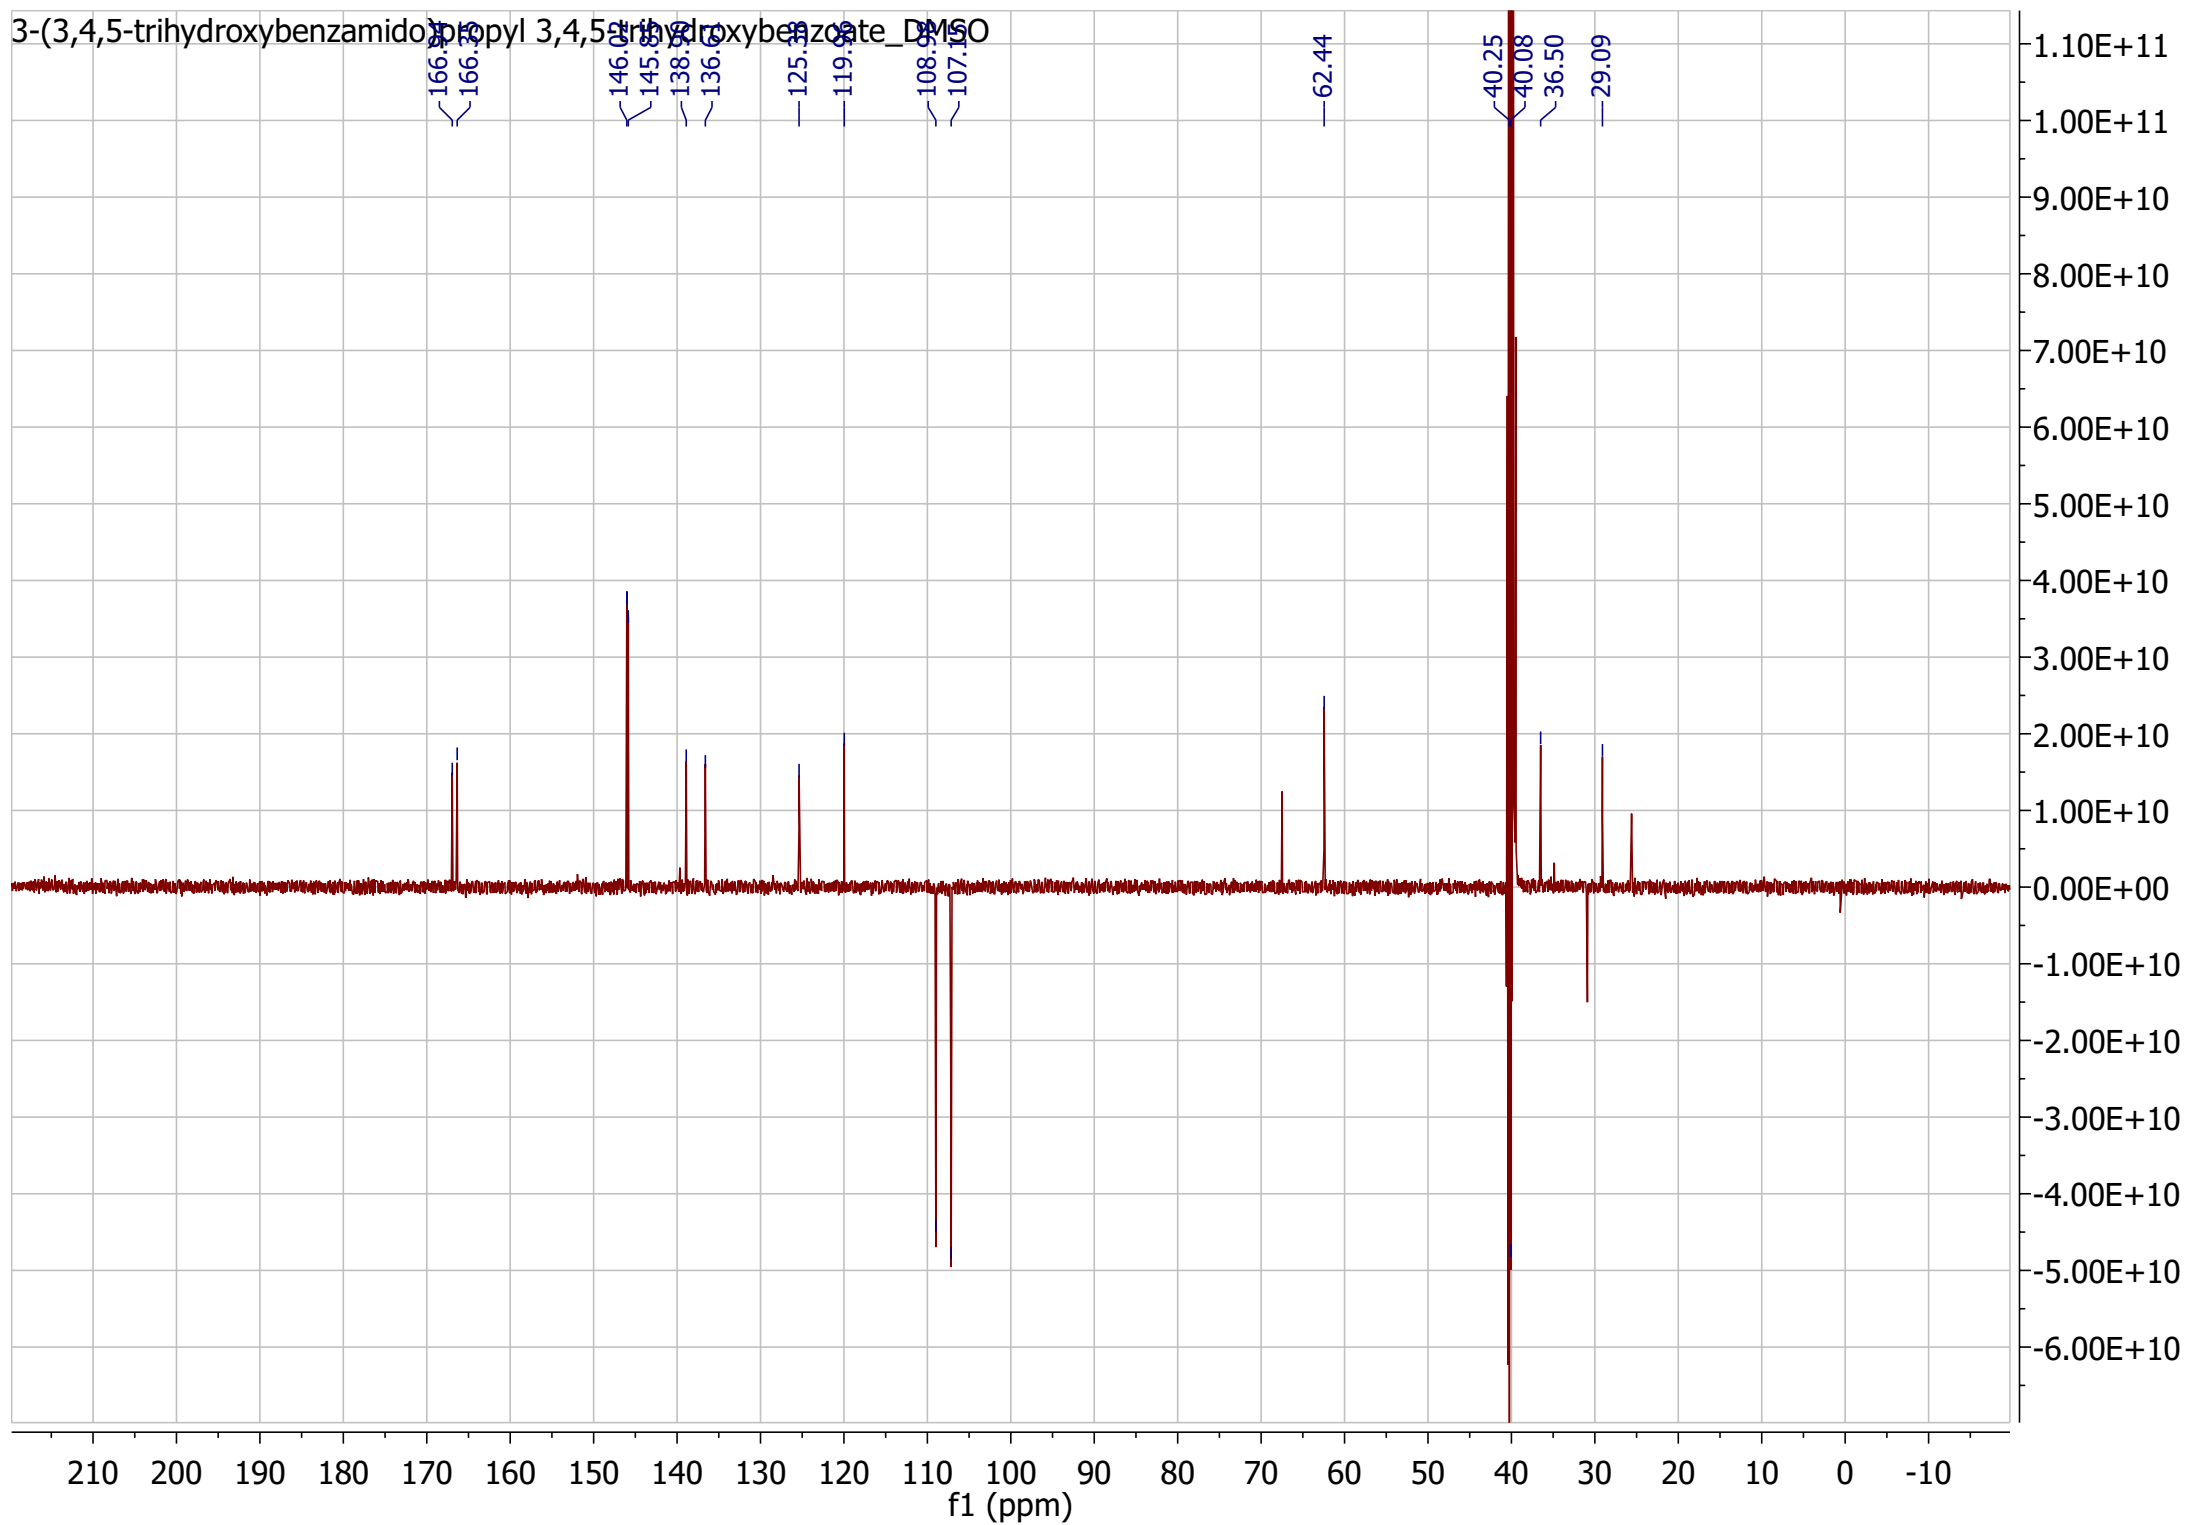

N,N'-(propane-1,3-diyl)bis(3,4,5-trihydroxybenzamide)\_DMSO

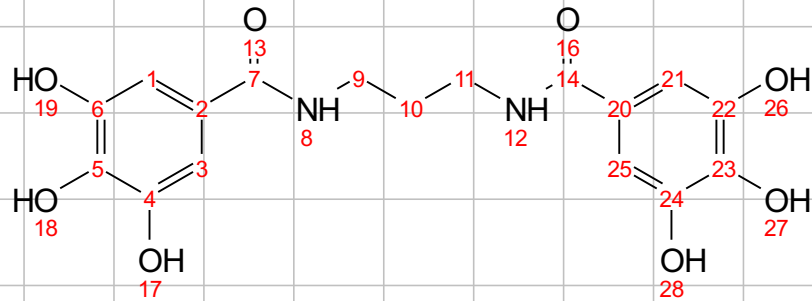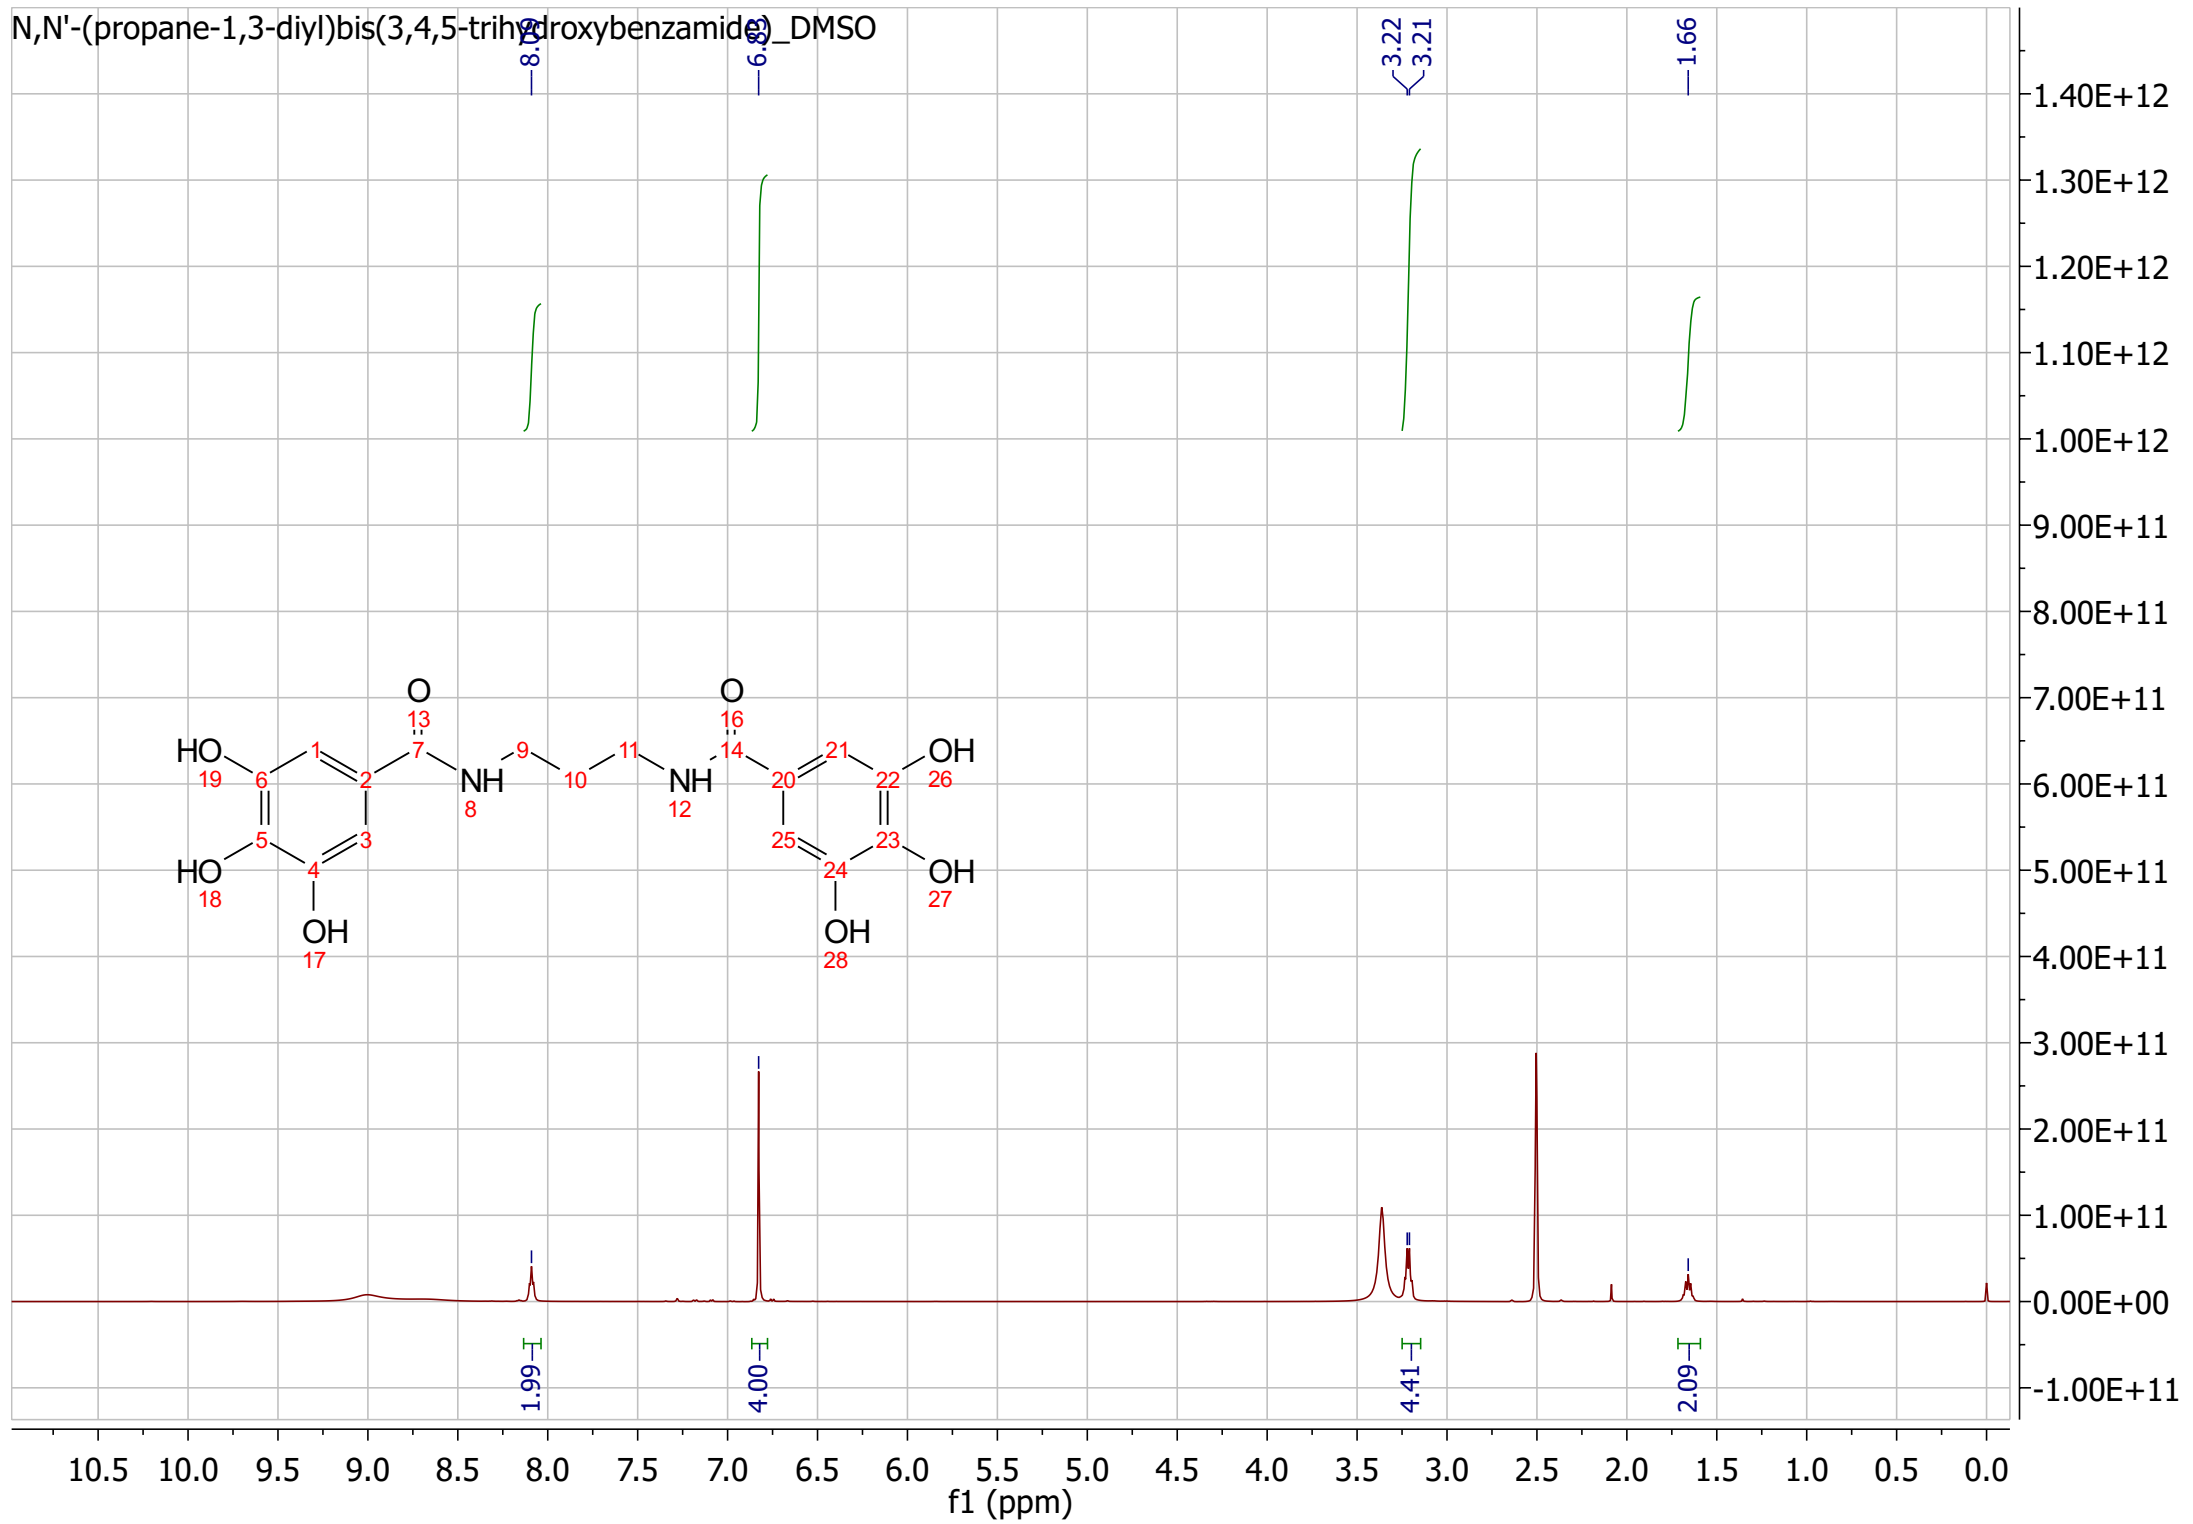



N,N'-(propane-1,3-diyl)bis(3,4,5-trihydroxybenzamide)\_DMSO

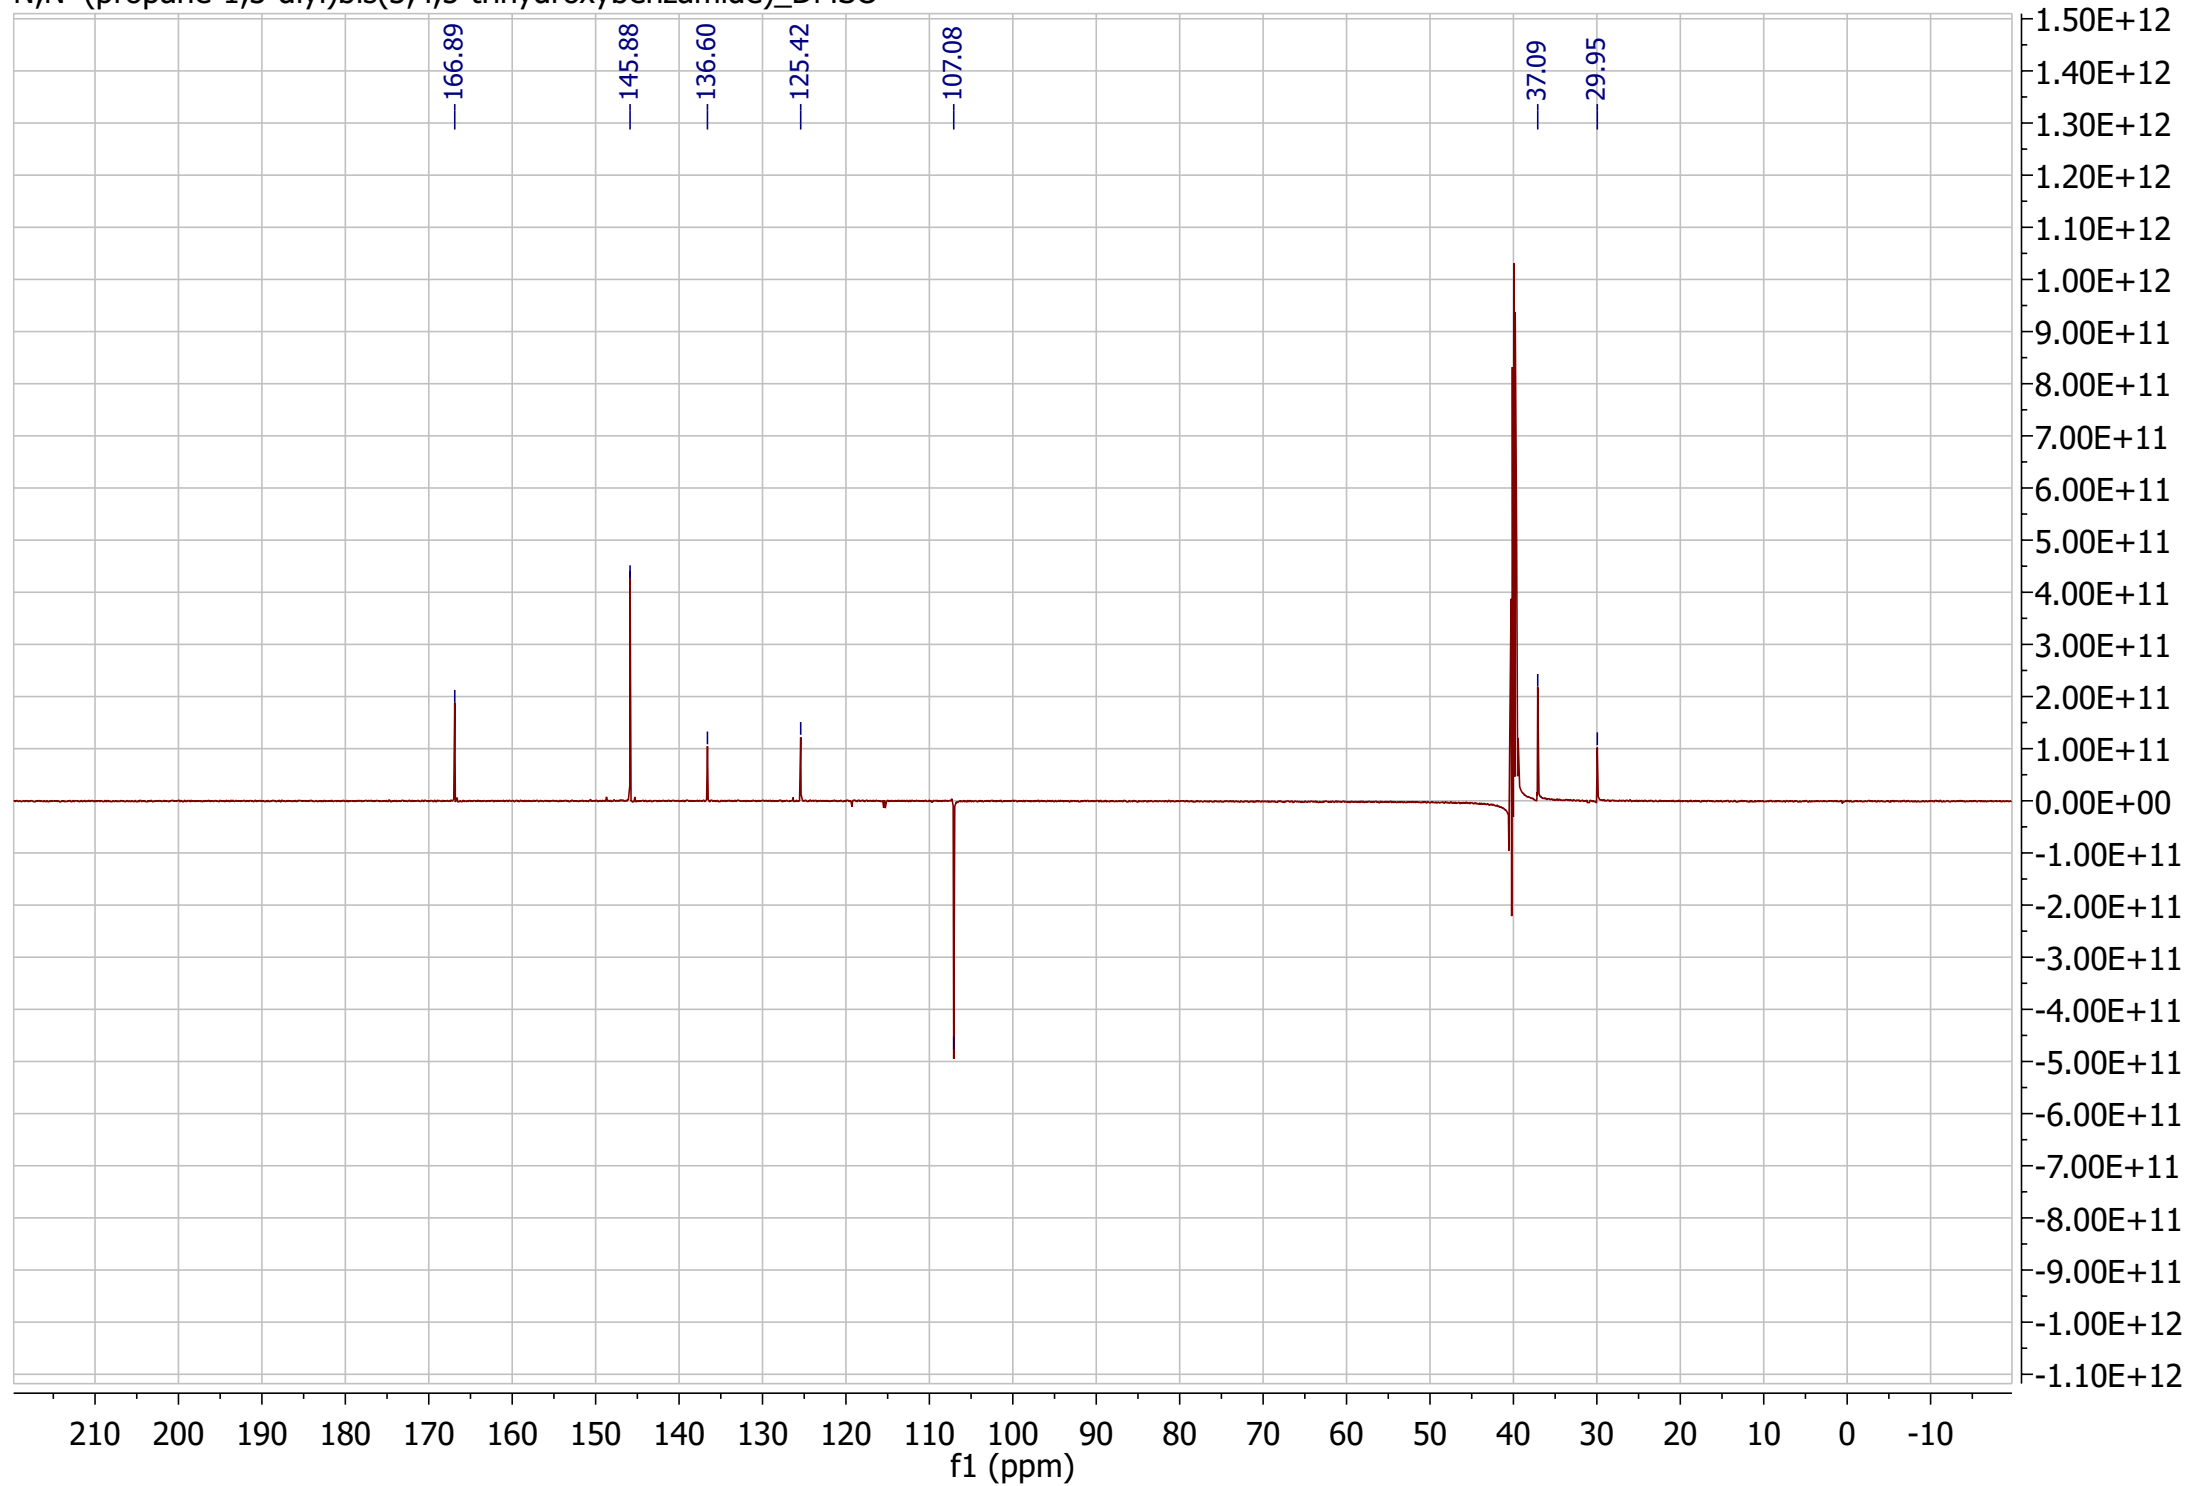

3-(3,4,5-trihydroxybenzamido)phenyl 3,4,5-trihydroxybenzoate\_DMSO



3-(3,4,5-trihydroxybenzamido)phenyl 3,4,5-trihydroxybenzoate\_DMSO



3-(3,4,5-trihydroxybenzamido)phenyl 3,4,5-trihydroxybenzoate\_DMSO

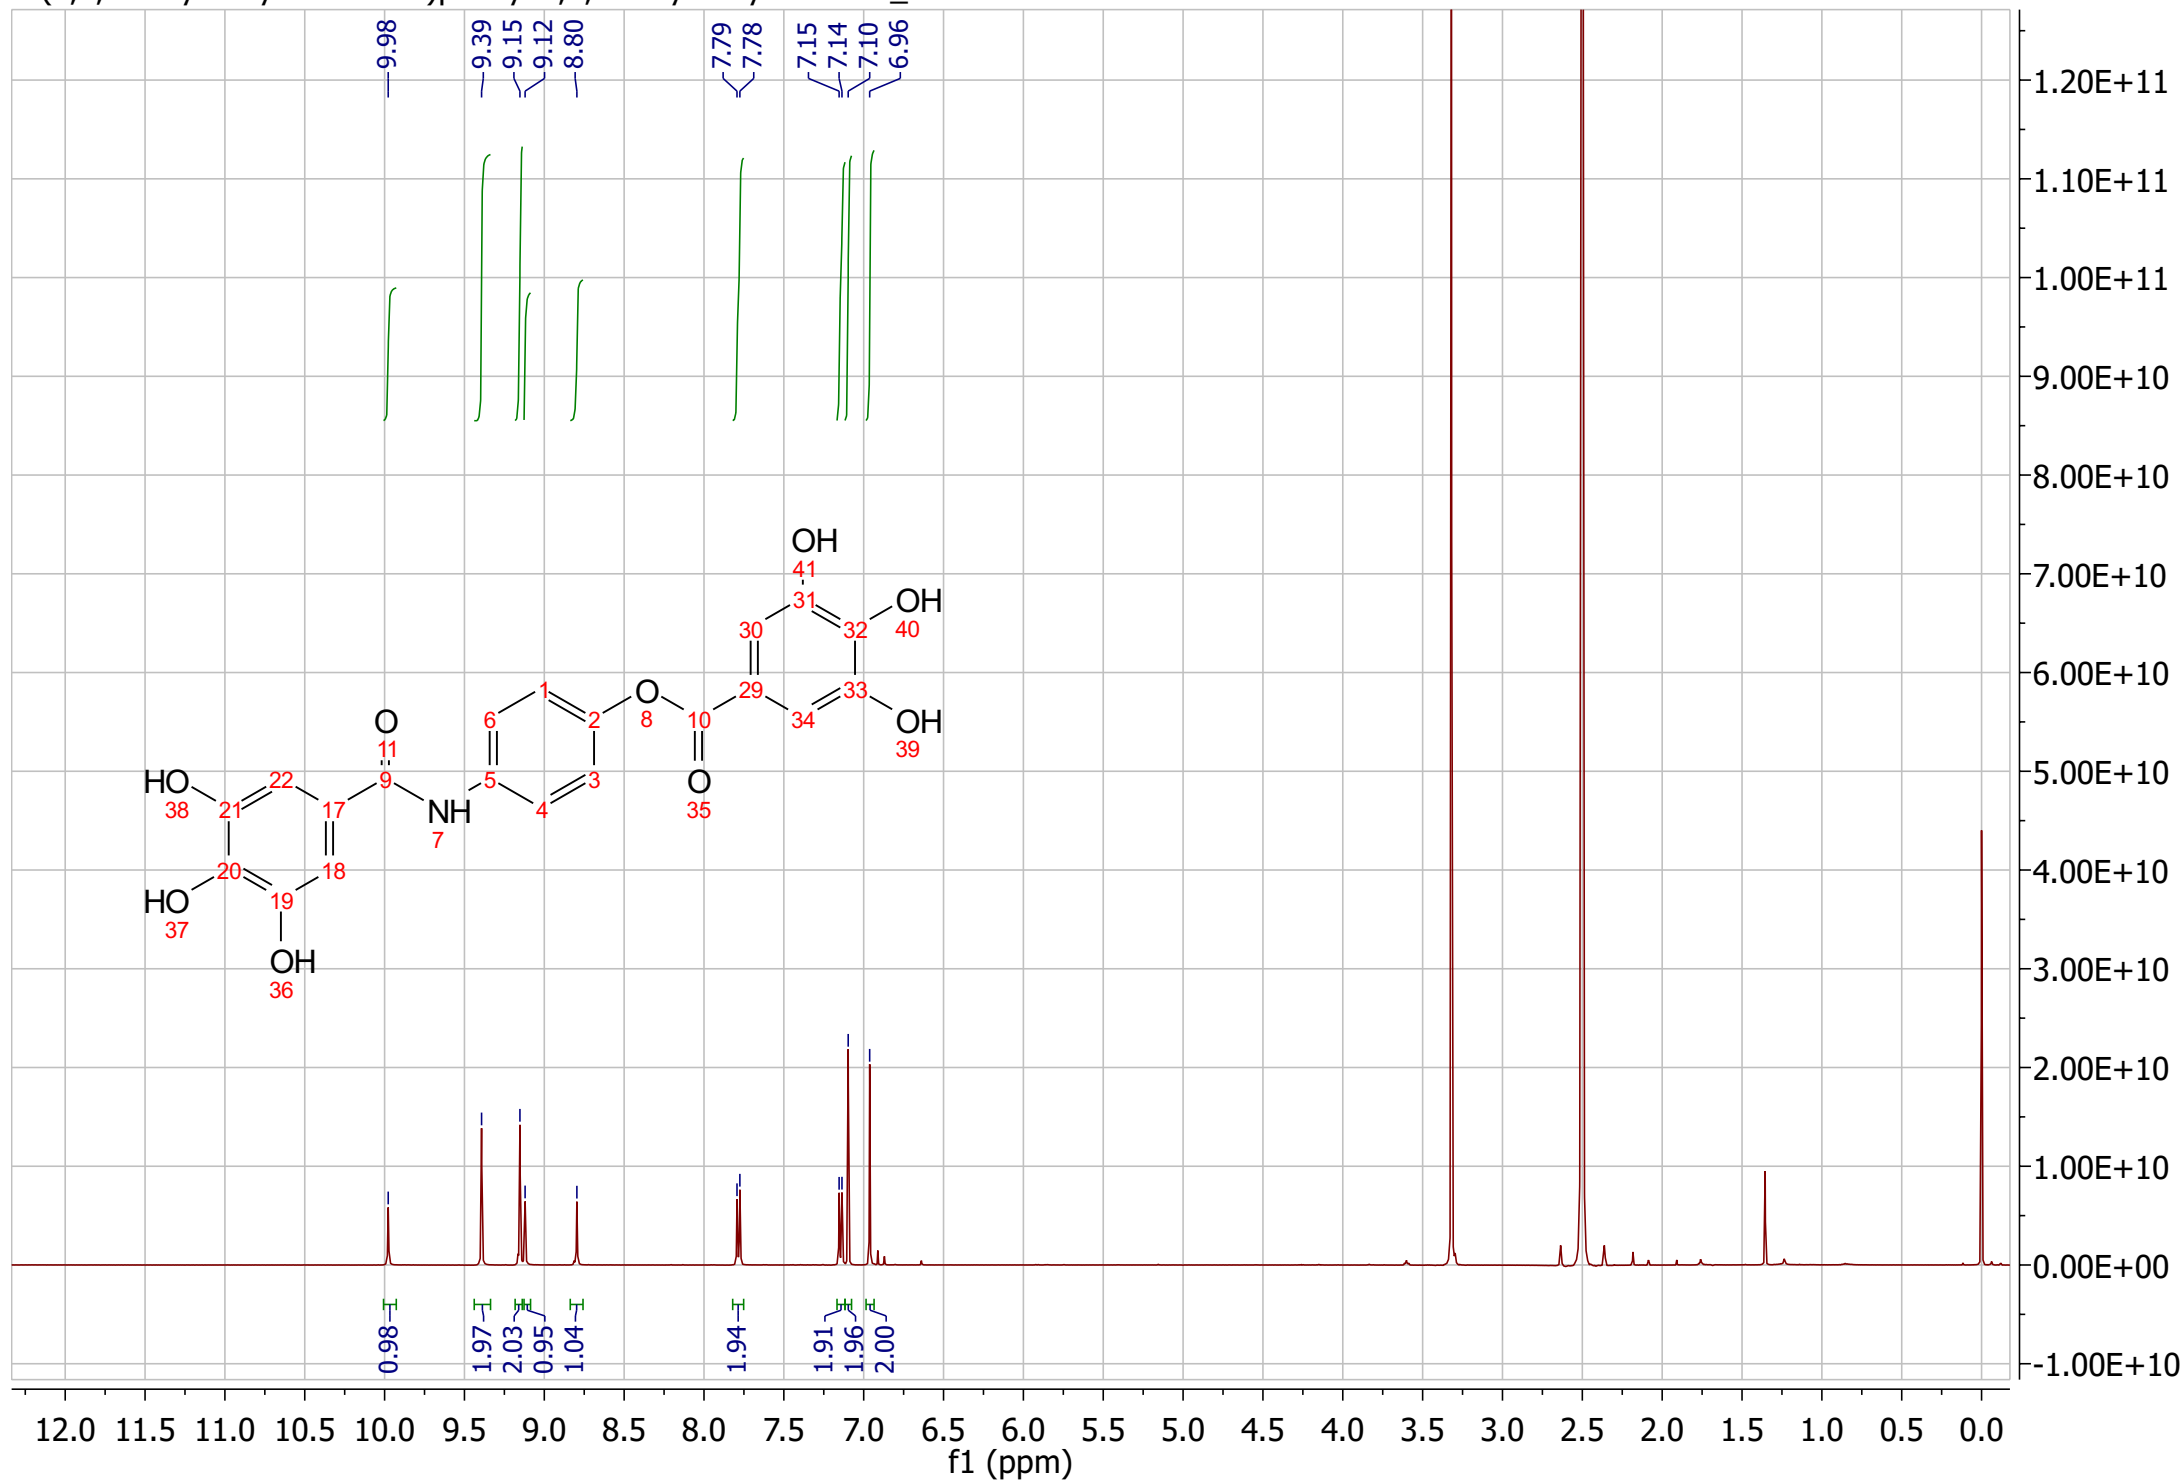

3-(3,4,5-trihydroxybenzamido)phenyl 3,4,5-trihydroxybenzoate\_DMSO

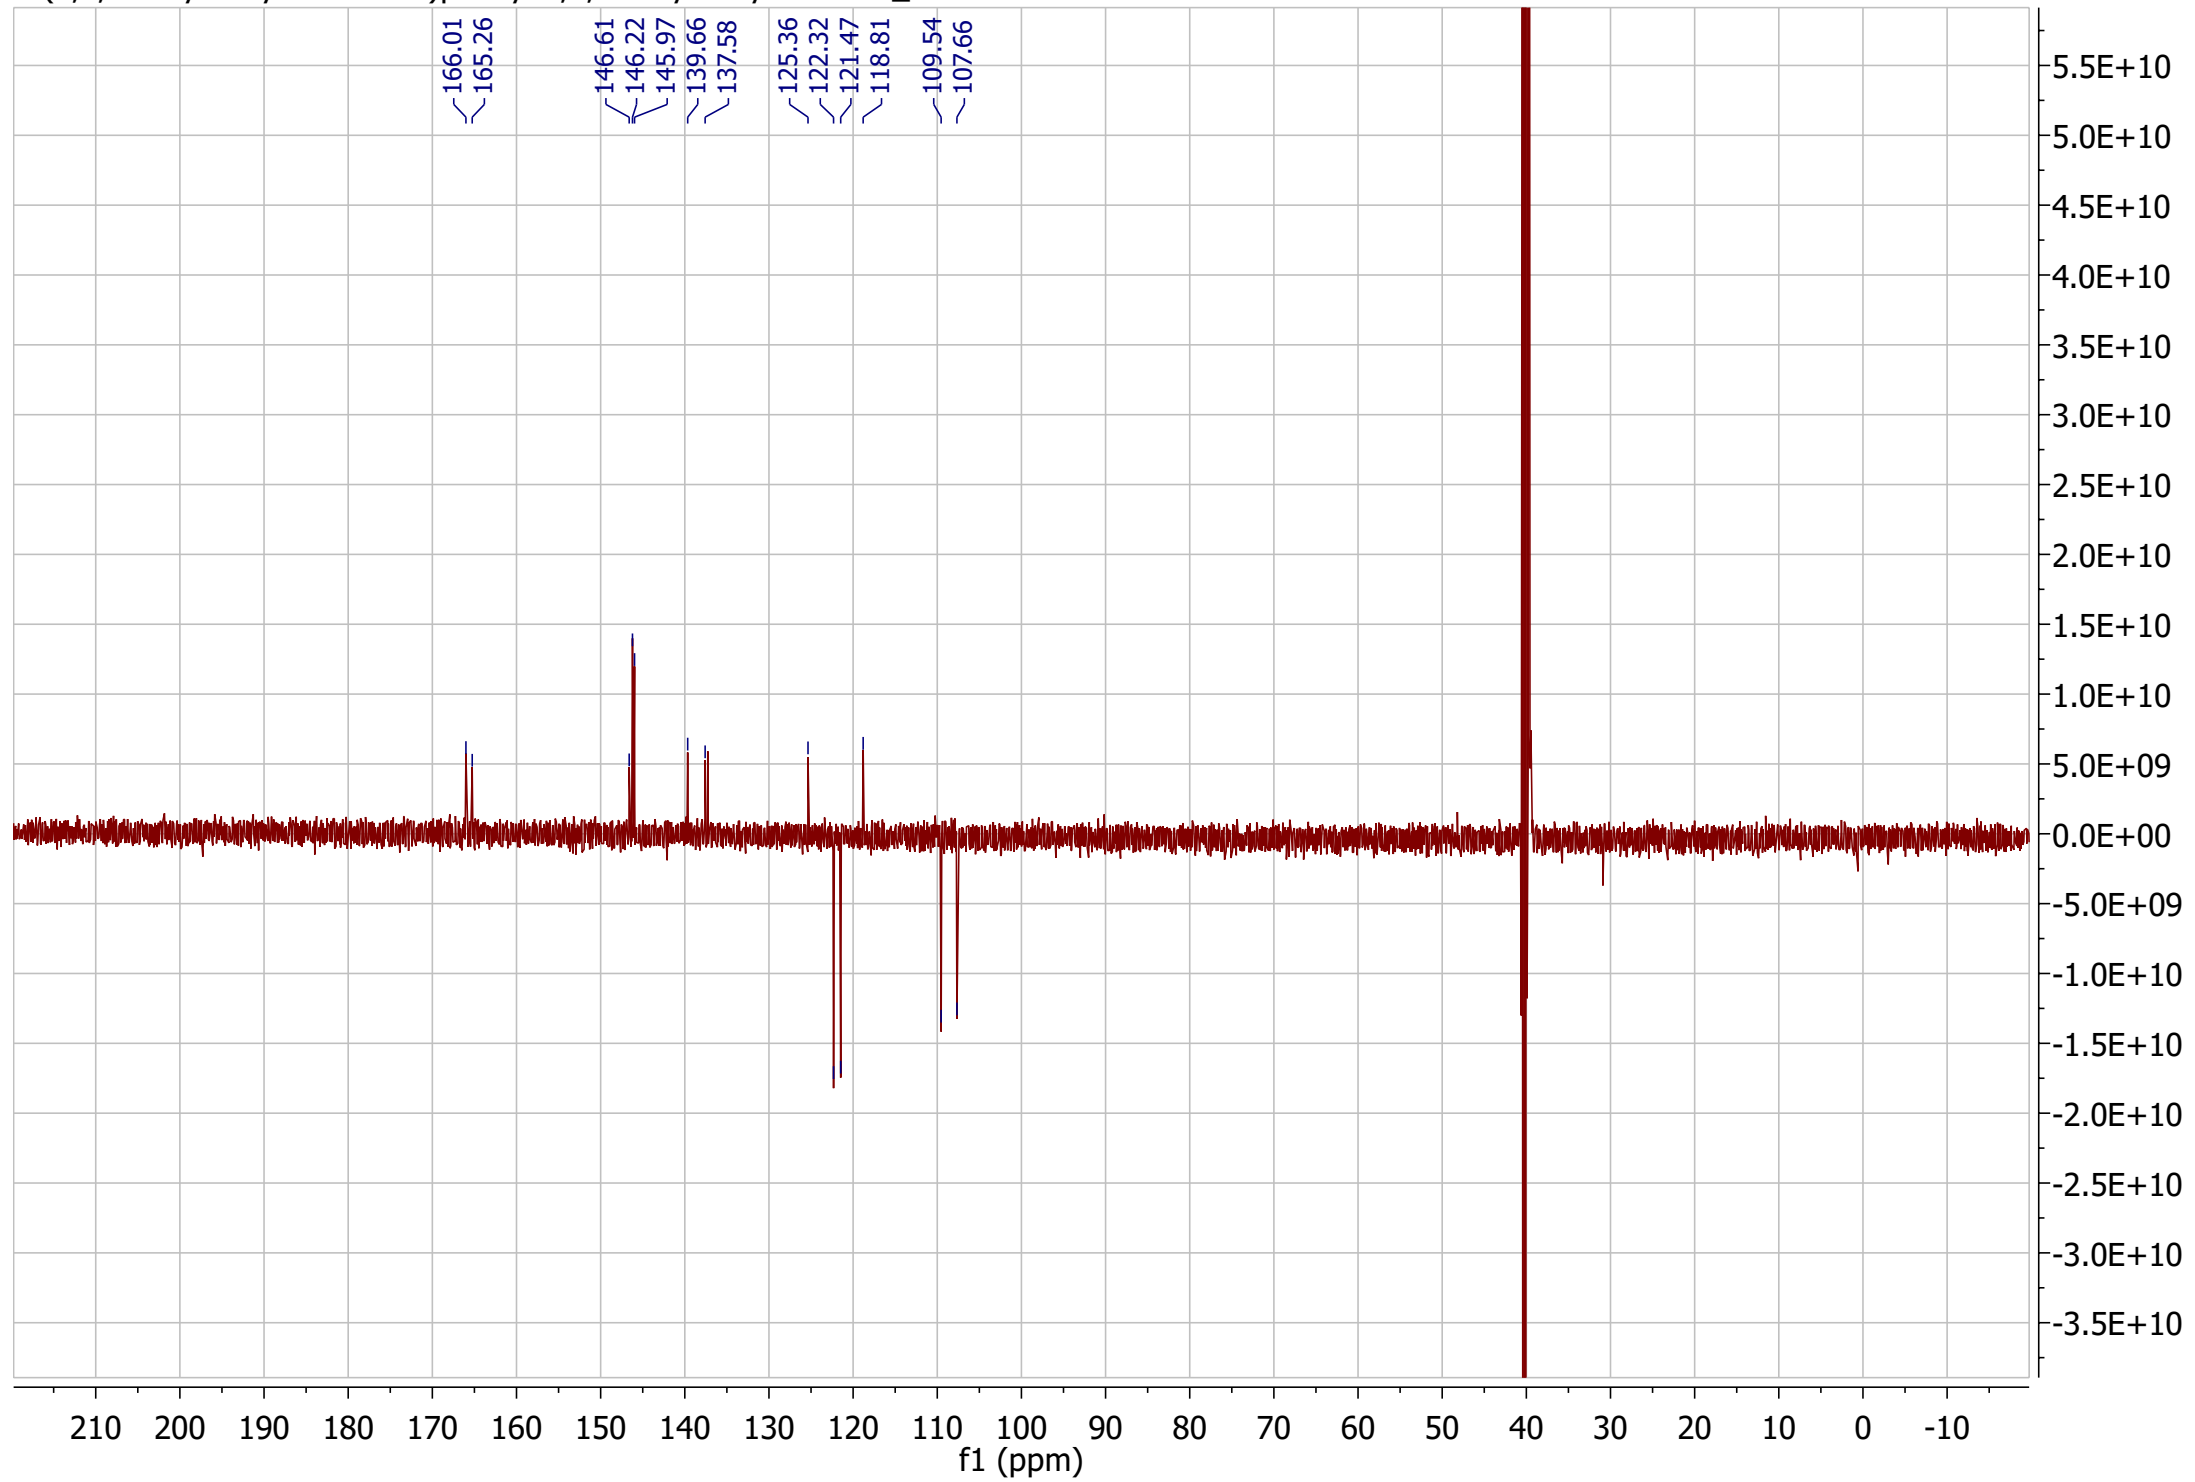

Propane-1,3-diyl bis(3,4-dihydroxybenzoate)\_DMSO

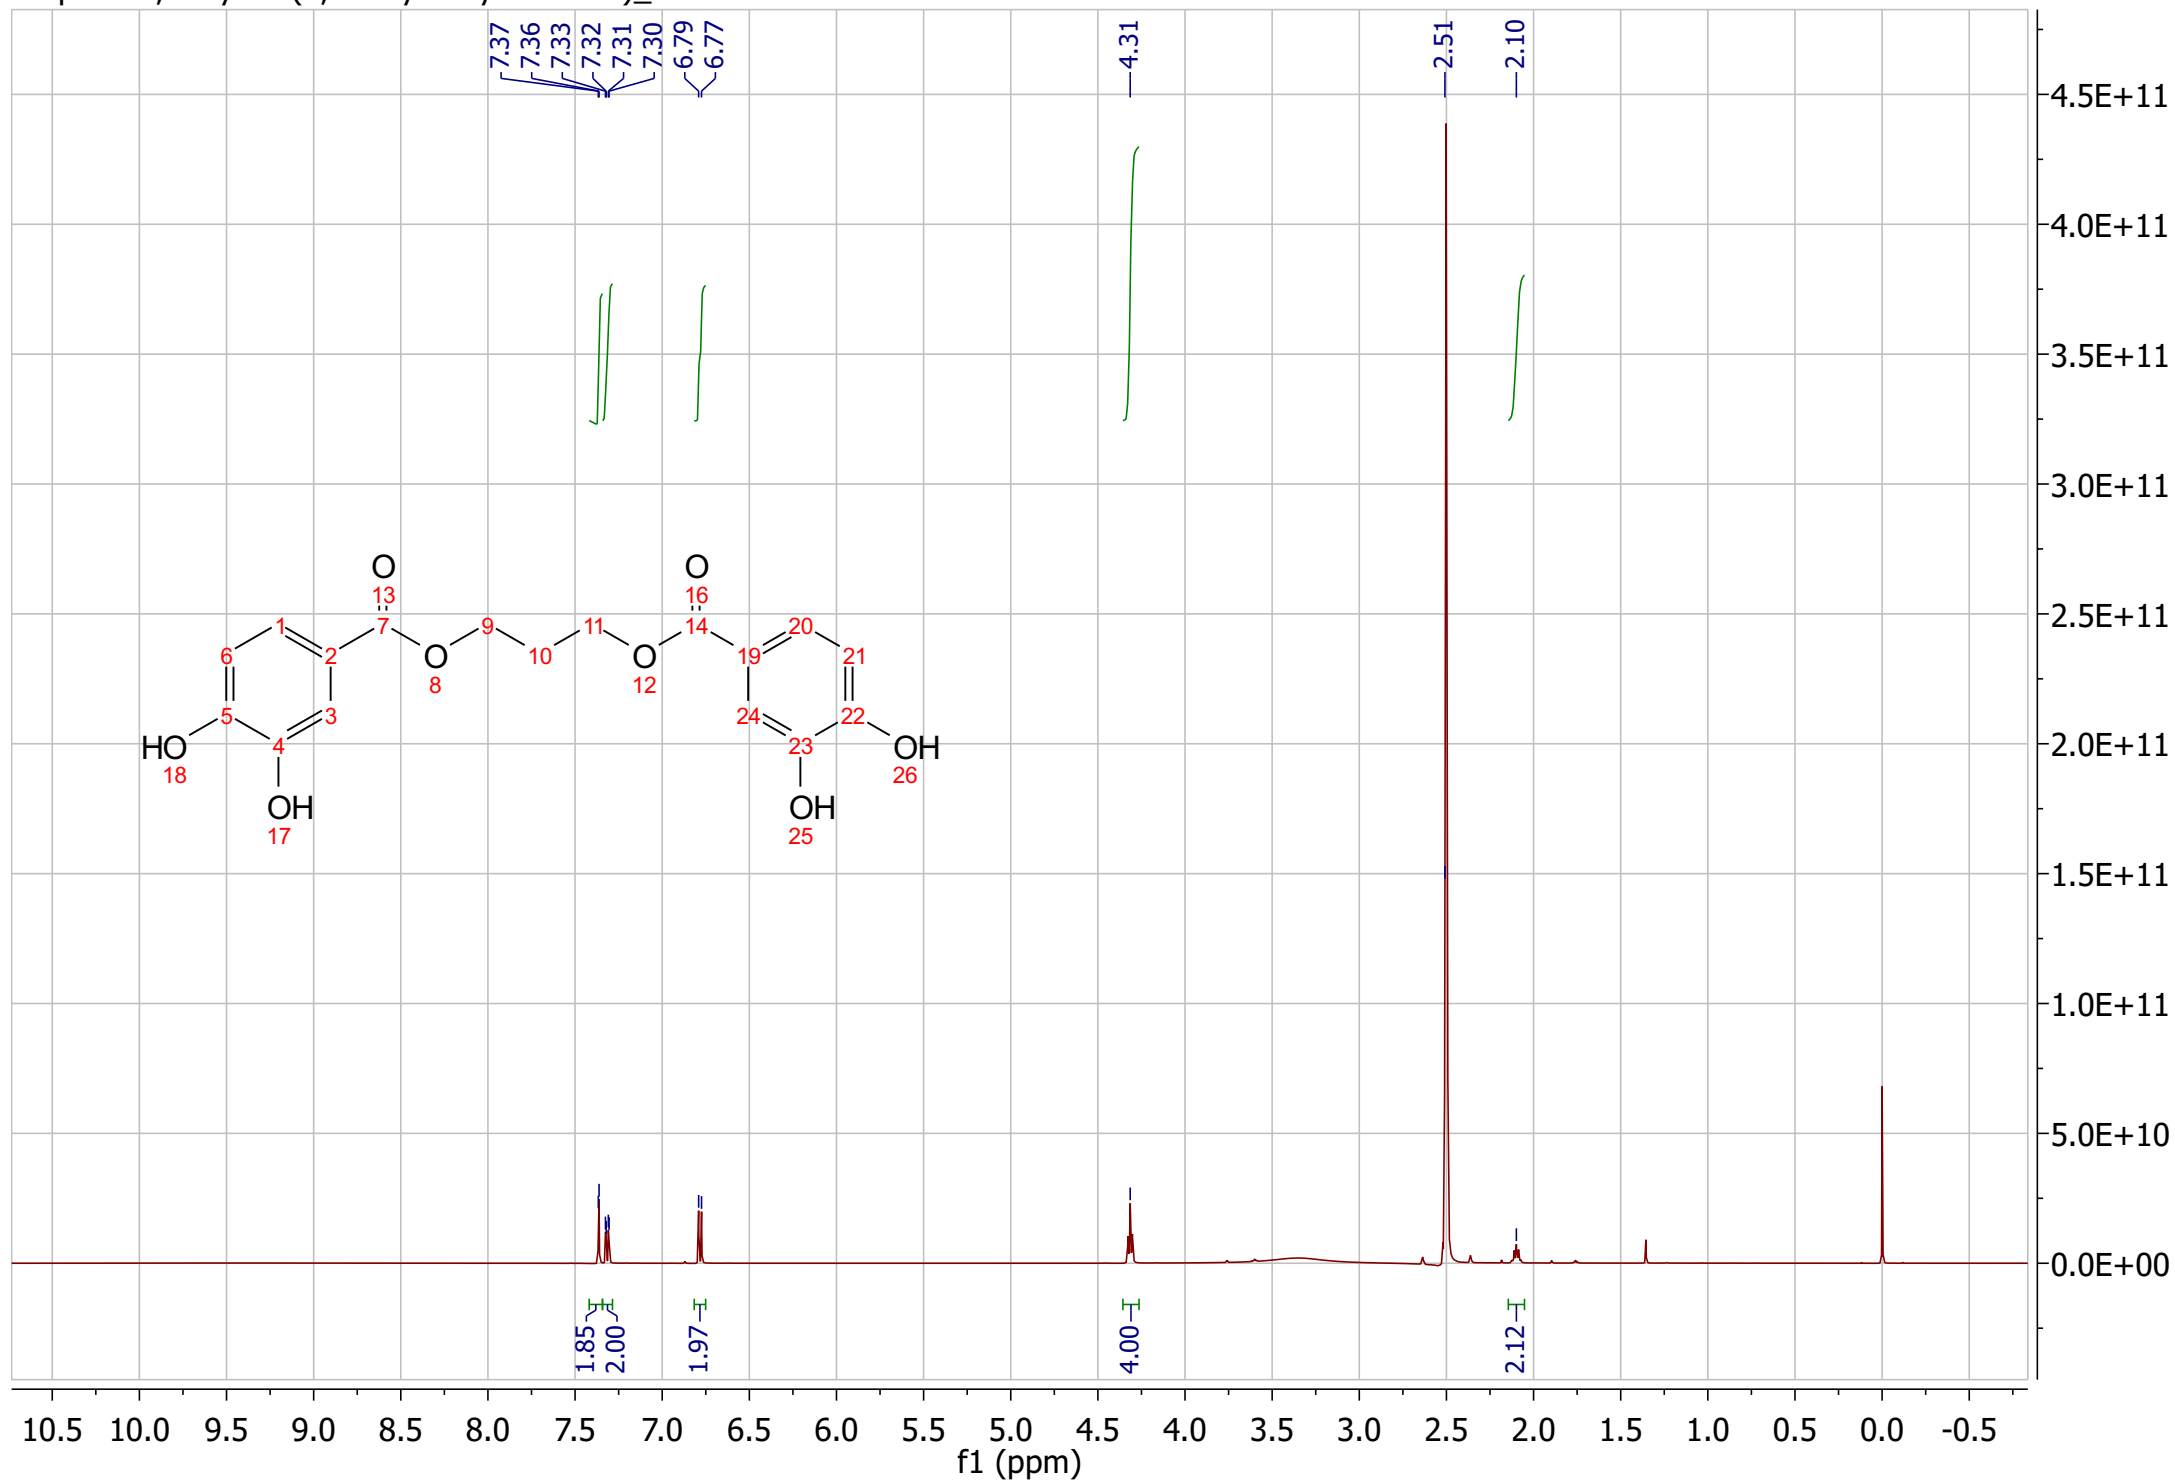

Propane-1,3-diyl bis(3,4-dihydroxybenzoate)\_DMSO

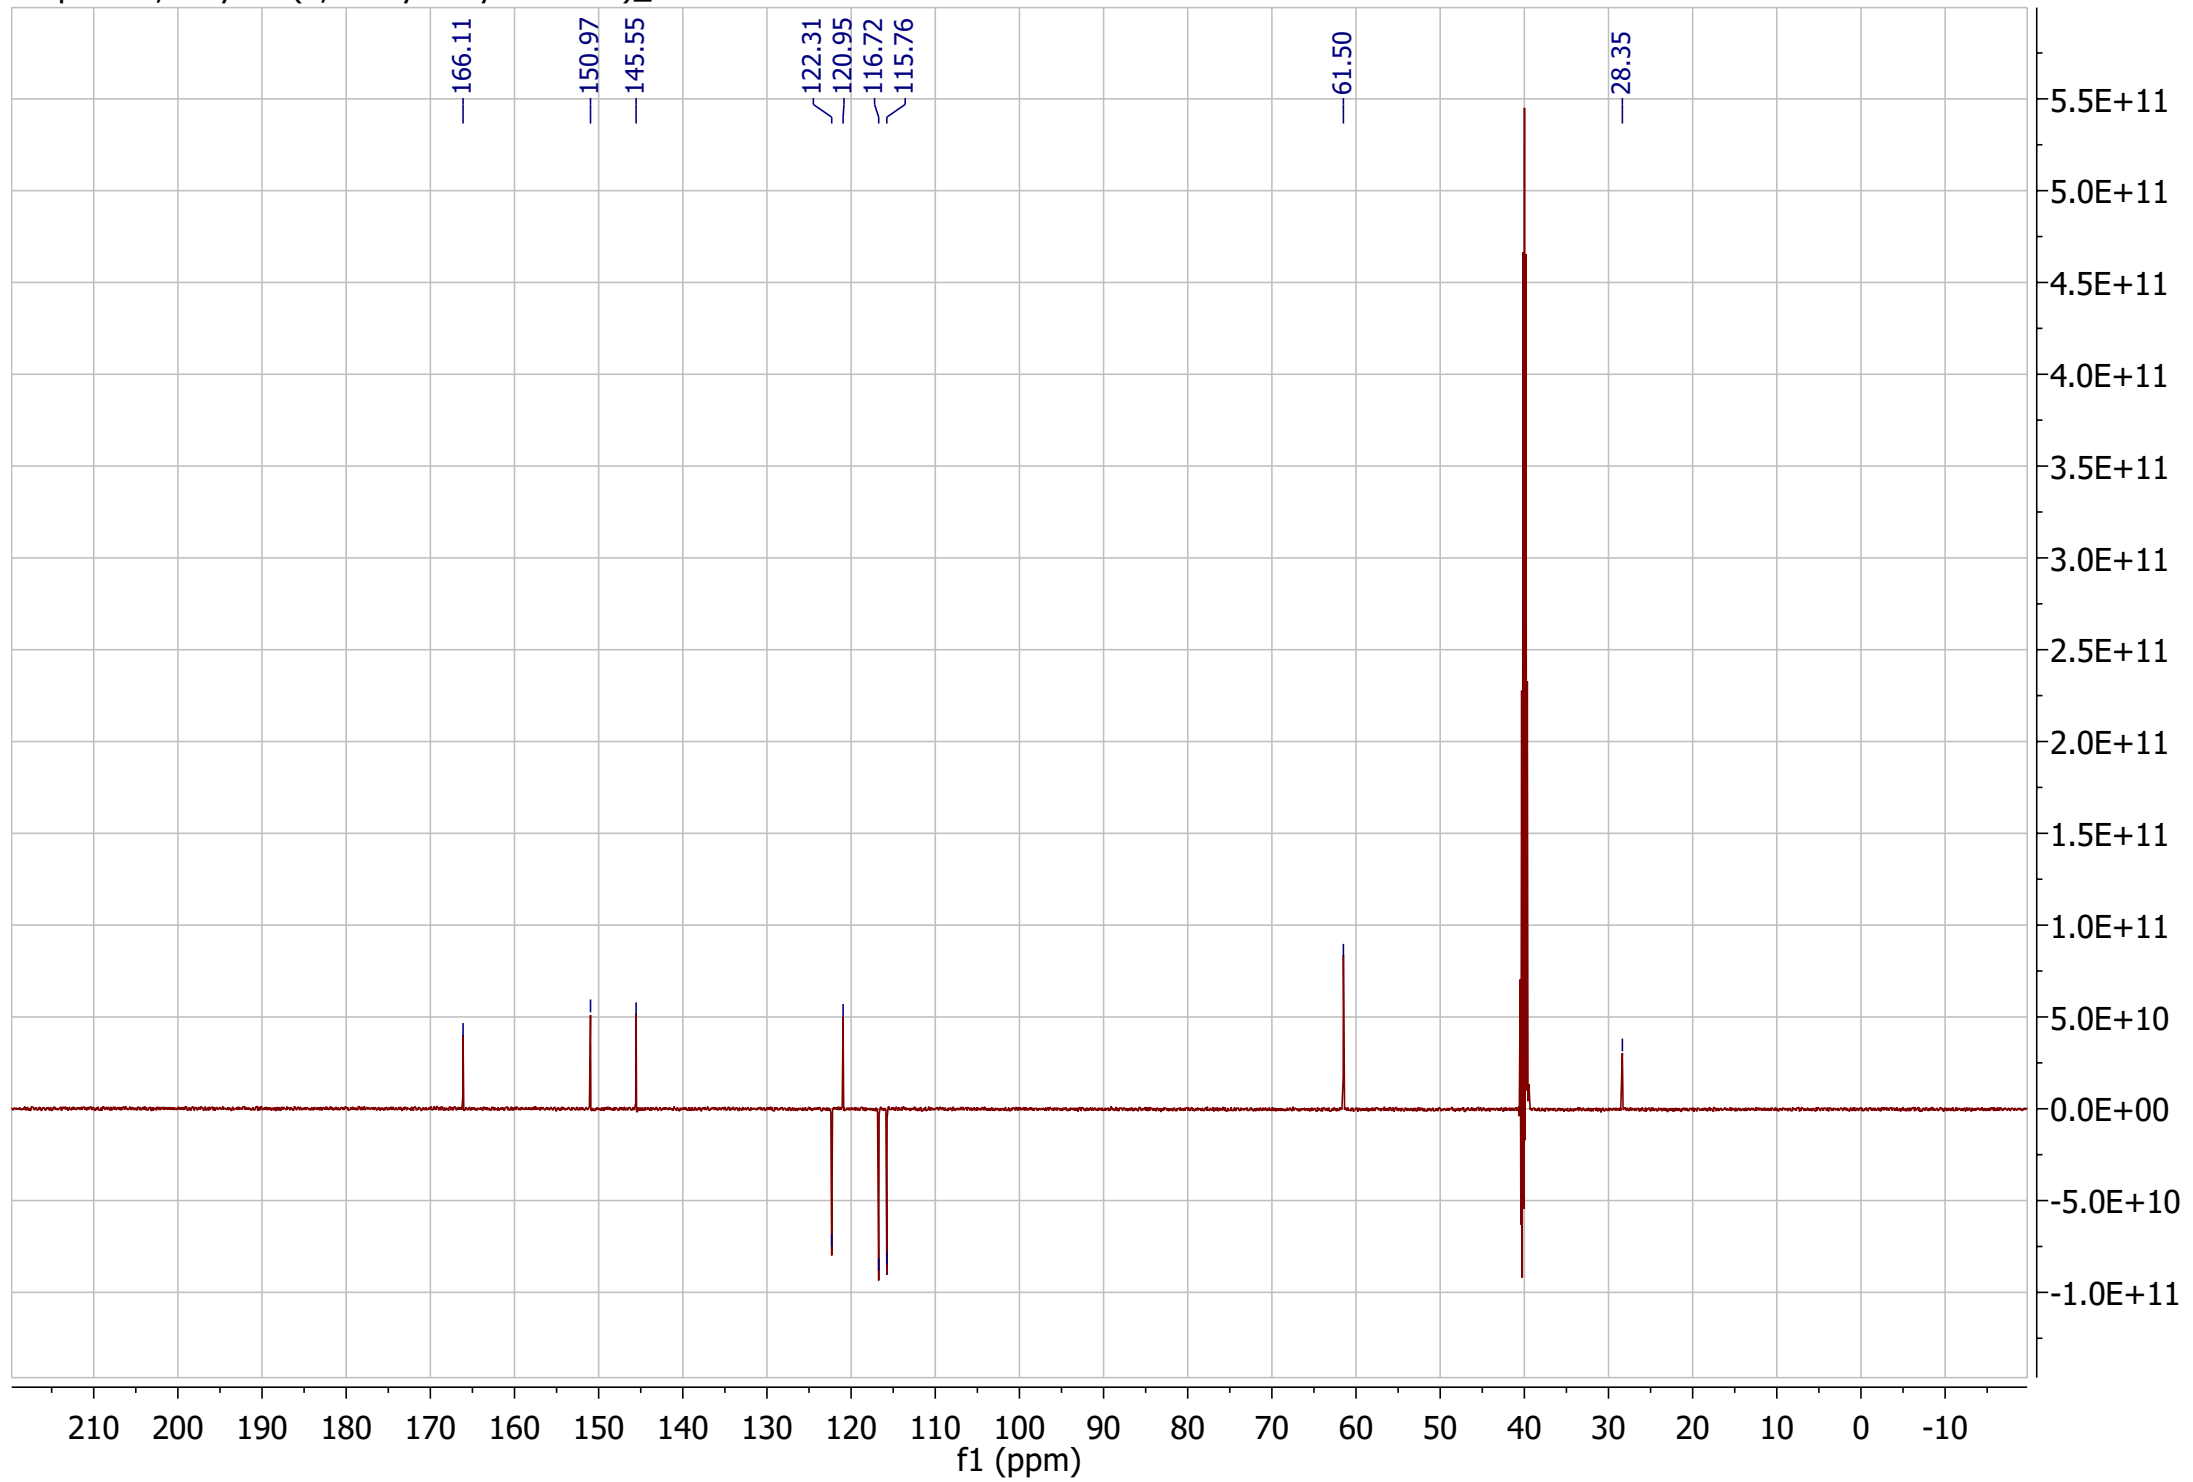

3-((3,5-dihydroxy-4-(2-hydroxyethoxy)benzoyl)oxy)propyl 3,4,5-trihydroxybenzoate\_MeOD

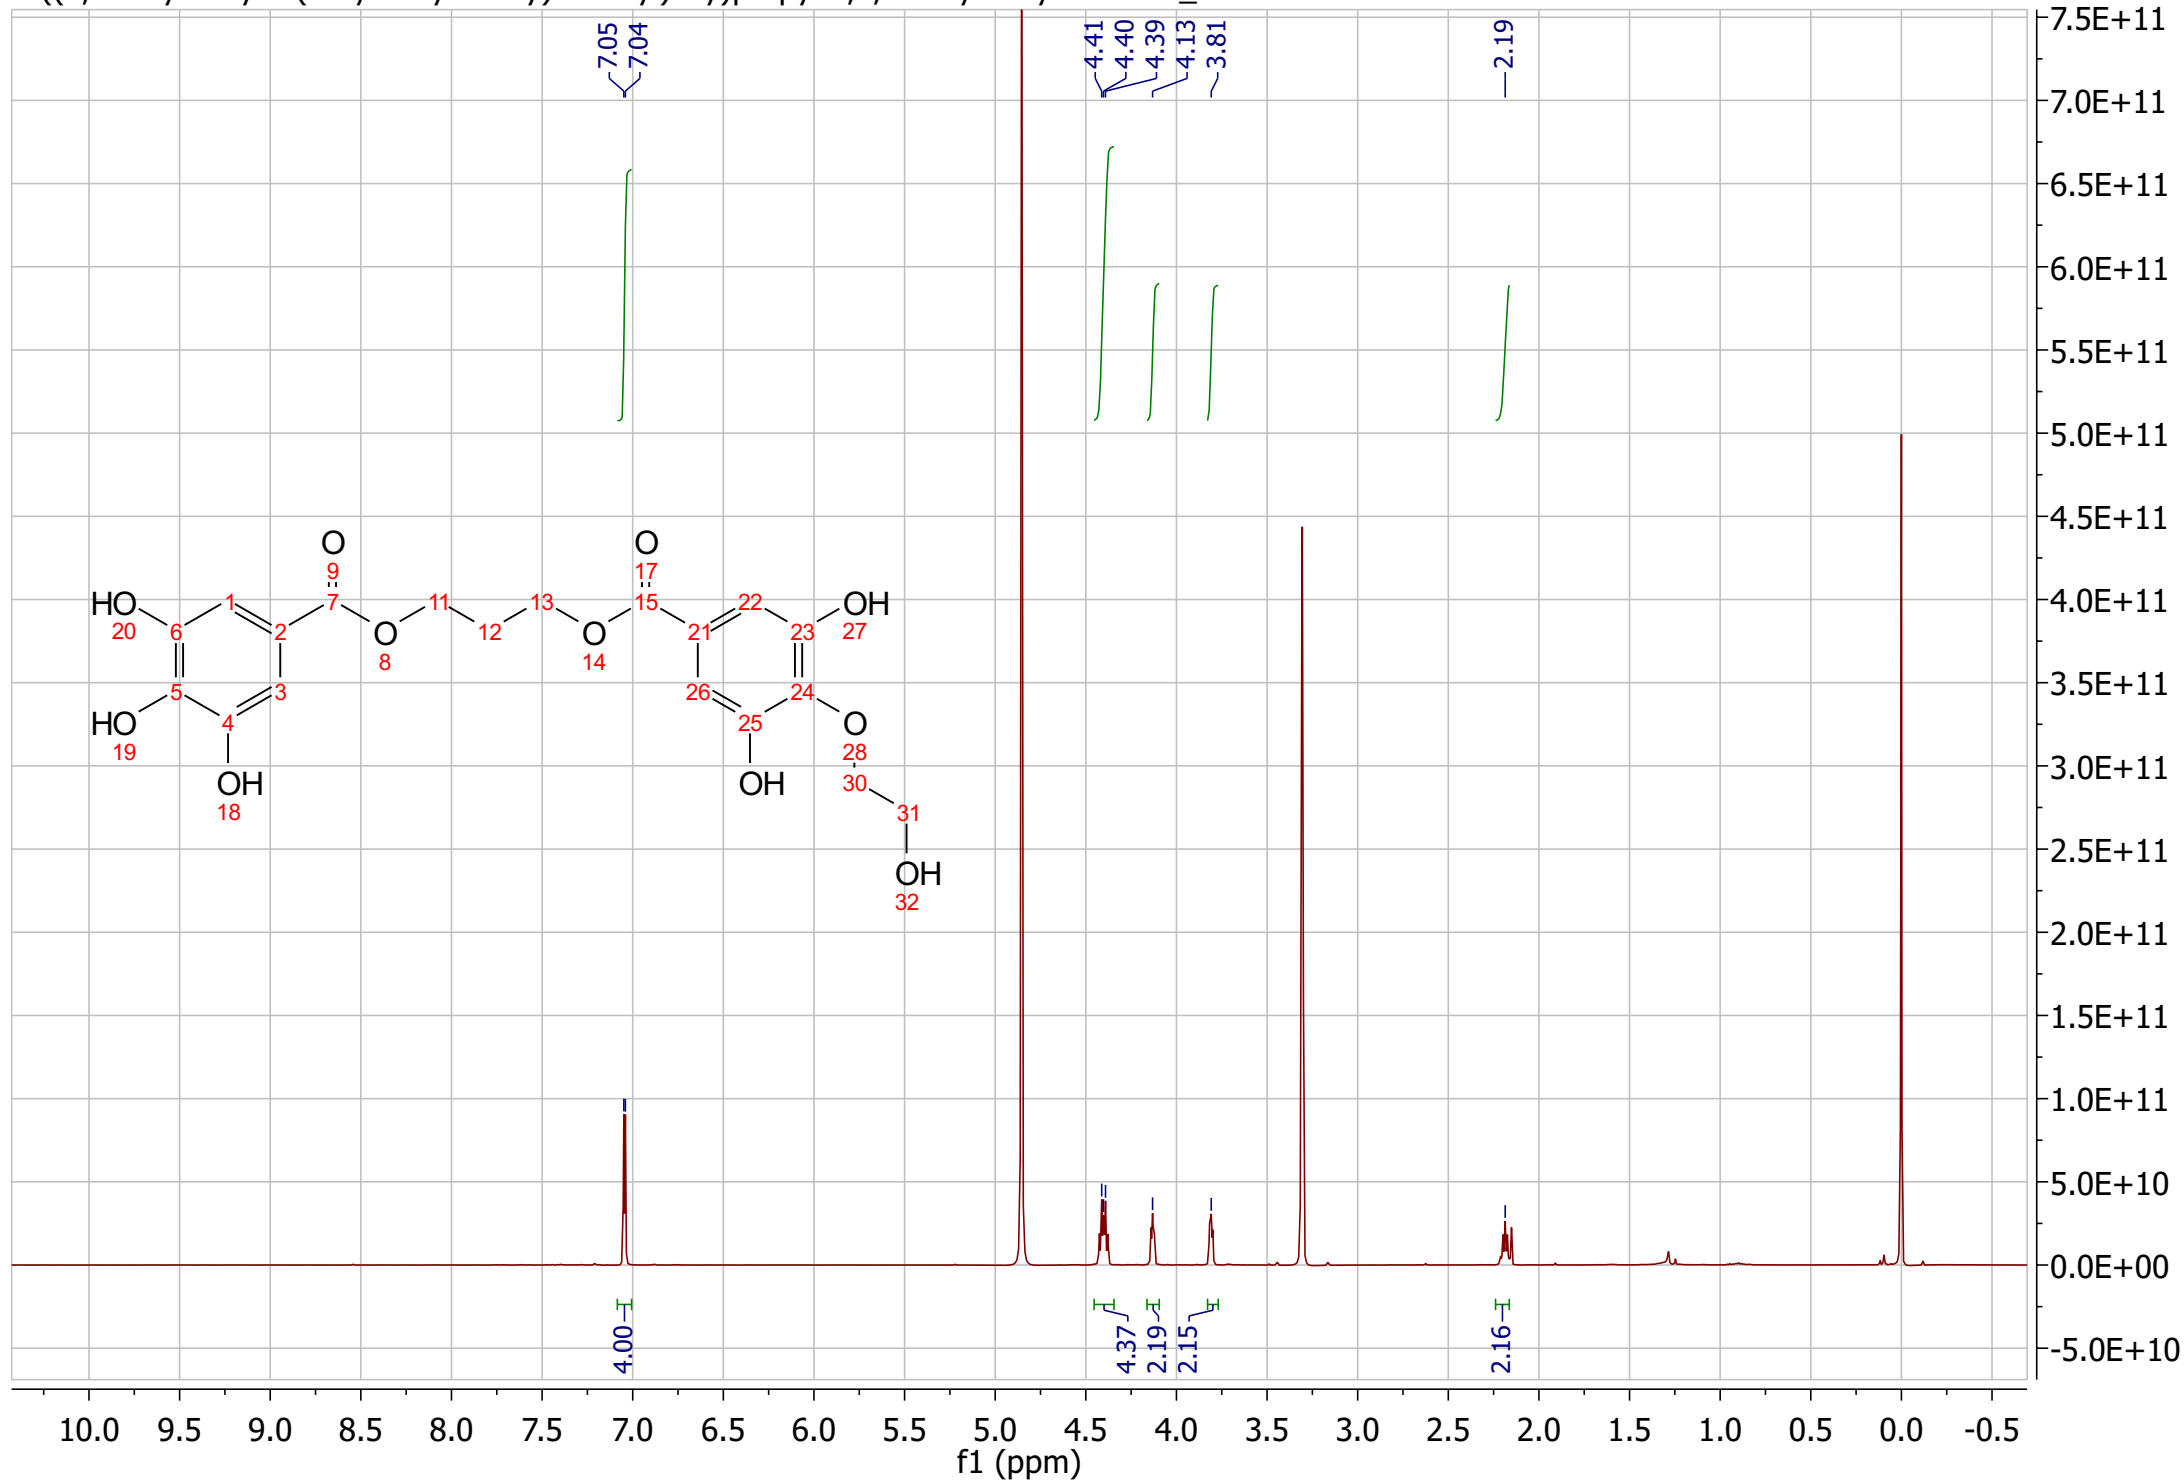



3-((3,5-dihydroxy-4-(2-hydroxyethoxy)benzoyl)oxy)propyl 3,4,5-trihydroxybenzoate\_MeOD

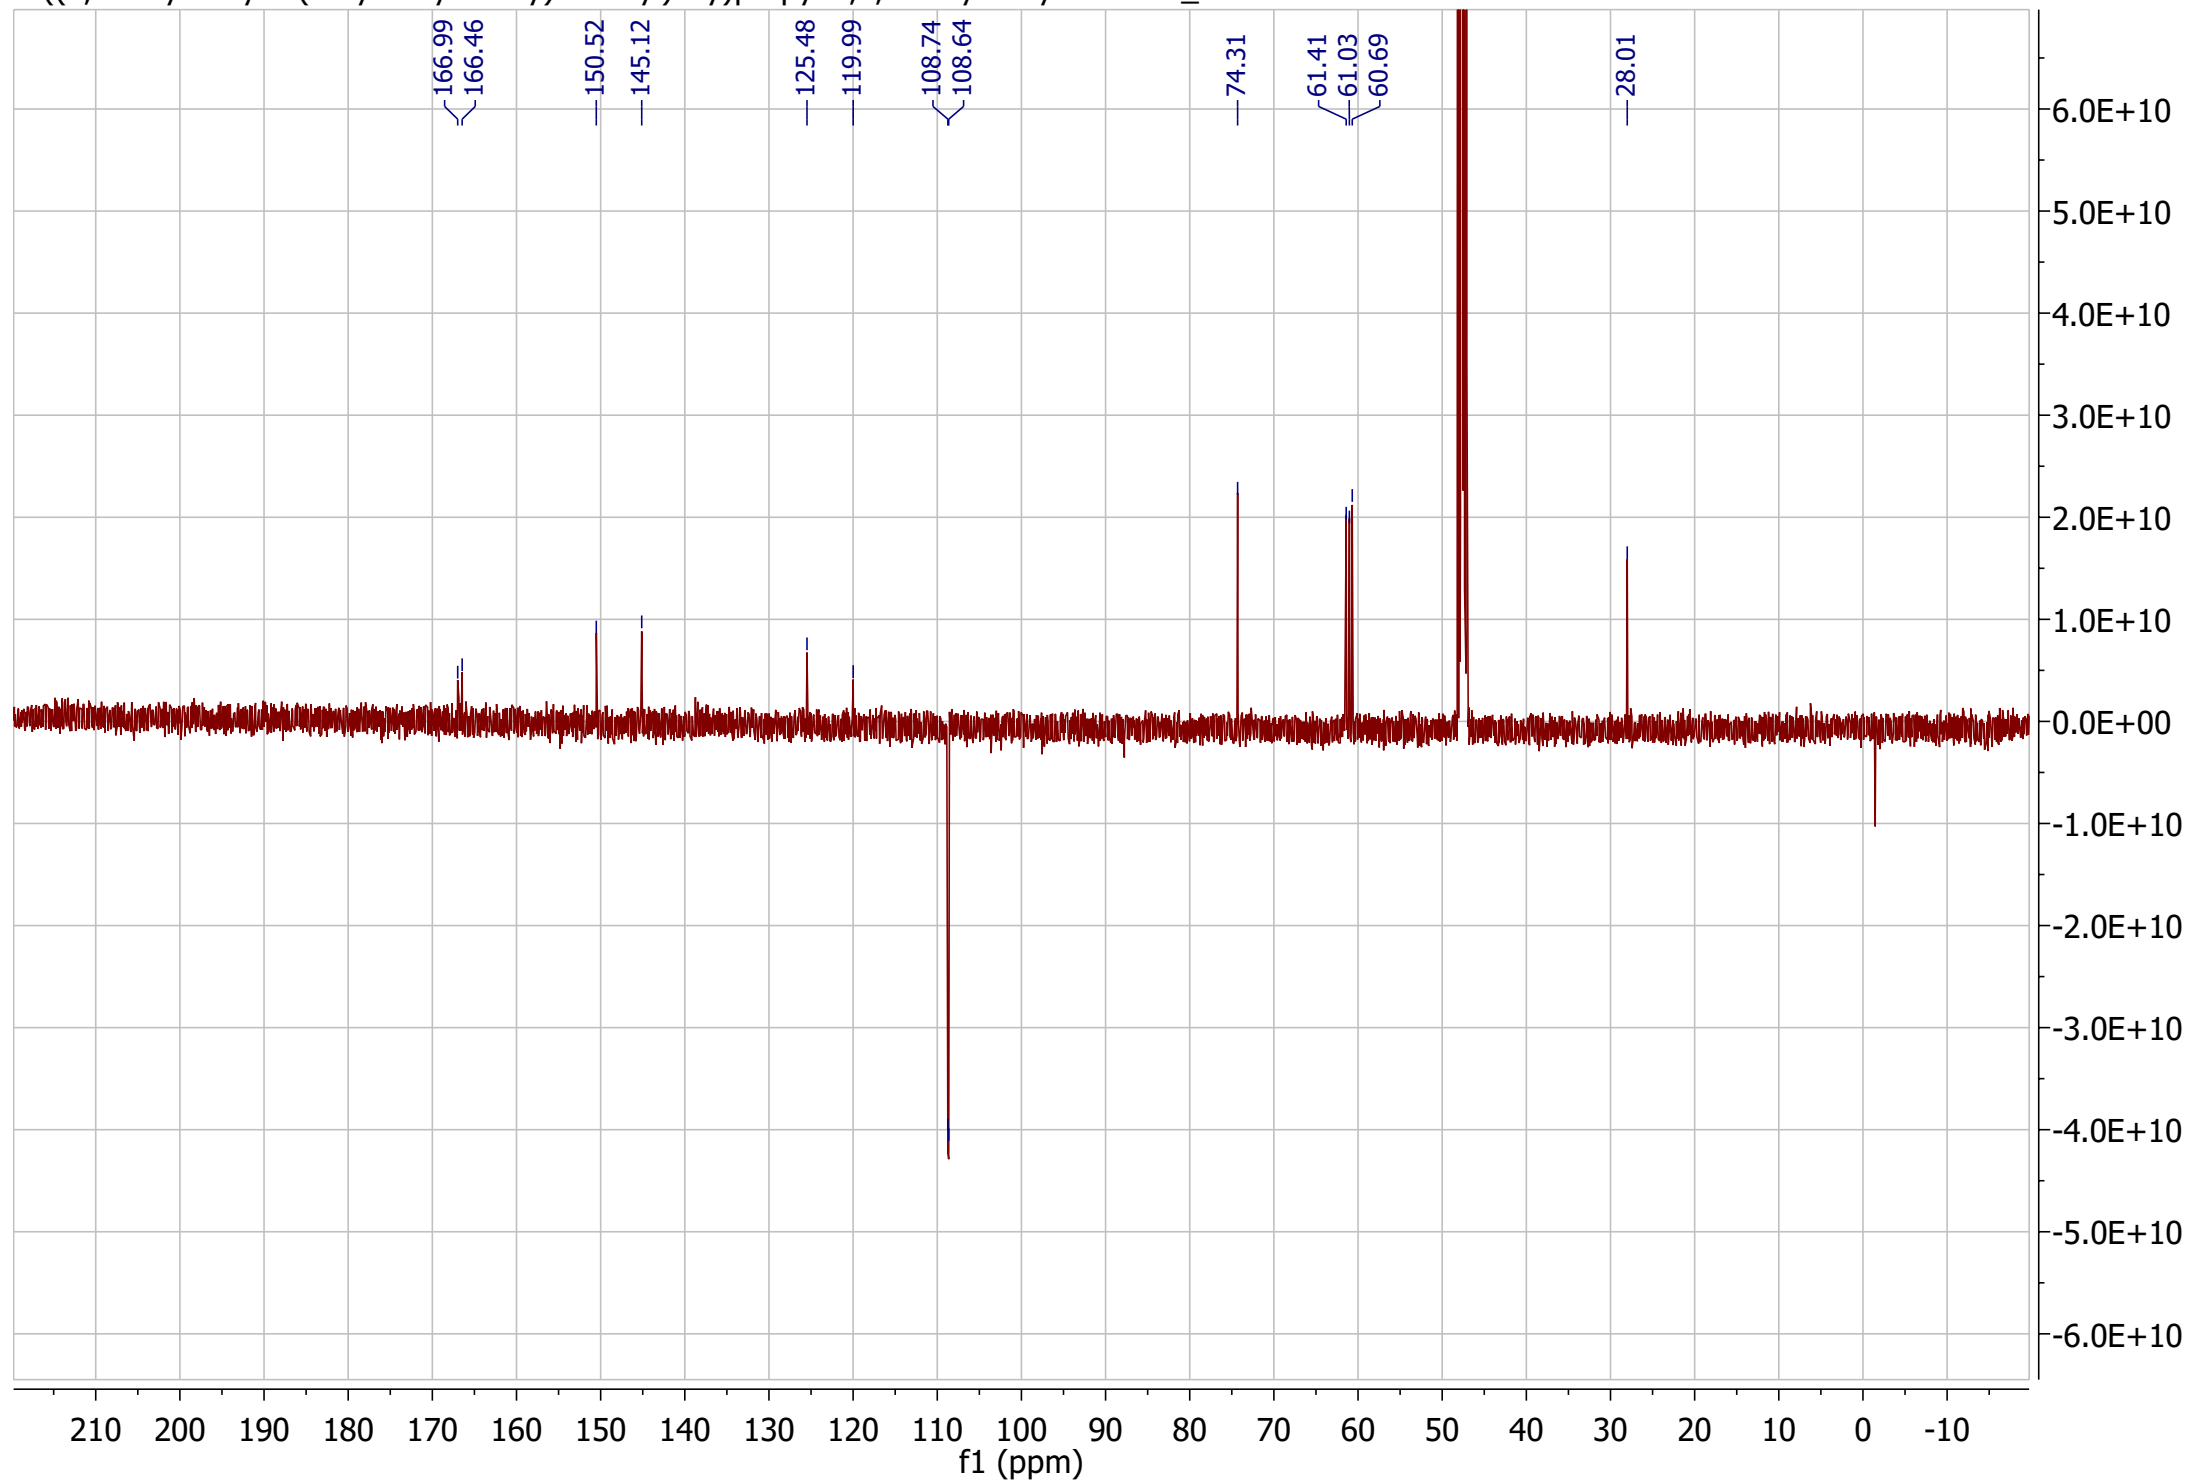

Supplement: d2md00392a1.pdf [file d2md00392a1.pdf]
